# Supplementary material for: Single-cell sequencing highlights heterogeneity and malignant progression in actinic keratosis and cutaneous squamous cell carcinoma
Source: eLife journal article supplement (doi:10.7554/elife.85270), 2023-12-15
Supplement: supp1 [file elife-85270-supp1-v2.zip]

## Sheet: Basal1
Table S17 The differentially accessible chromatin regions between cell types of poorly-differentiated cSCC sample in scATAC-seq data.
	p_val	avg_log2FC	pct.1	pct.2	p_val_adj	gene	distance
chr14-100320156-100335615	5.41955e-70	0.519275	0.243	0.08	7.50445e-65	WARS	0
chr12-52511525-52526326	1.30448e-90	0.460632	0.337	0.129	1.80631e-85	KRT5	0
chr8-94638674-94643341	3.34743e-58	0.345765	0.218	0.081	4.63519e-53	ESRP1	0
chr7-26346250-26348460	9.71414e-56	0.329331	0.211	0.077	1.34512e-50	SNX10	0
chr8-93873442-93876324	1.18932e-52	0.321875	0.22	0.09	1.64686e-47	PDP1	0
chr8-39939247-39944548	1.50315e-59	0.308047	0.248	0.117	2.08141e-54	IDO2	0
chr14-74565615-74575163	7.6693e-44	0.305464	0.255	0.138	1.06197e-38	LTBP2	0
chr7-20328961-20332902	3.58793e-39	0.281473	0.257	0.14	4.96821e-34	ITGB8	0
chr11-120121014-120125581	8.54112e-39	0.273068	0.2	0.087	1.18269e-33	TRIM29	0
chr8-102755792-102759504	1.02787e-41	0.269146	0.202	0.096	1.42329e-36	KB-1732A1.1	46012
chr14-85527826-85537112	1.37133e-41	0.263967	0.213	0.111	1.89888e-36	FLRT2	0
chr7-5418380-5430635	1.71051e-51	0.263073	0.341	0.22	2.36854e-46	TNRC18	0
chr14-64501062-64511699	0.0283209	-0.25002	0.236	0.325	1	ZBTB25	0
chr7-112448780-112452882	1.48088e-05	-0.250313	0.119	0.21	1	IFRD1	0
chr12-71661364-71665426	5.28347e-06	-0.250411	0.177	0.274	0.731602	ZFC3H1	0
chr17-50146098-50152818	0.000133055	-0.250446	0.116	0.206	1	PPP1R9B	0
chr3-38022206-38026270	3.55136e-05	-0.250502	0.148	0.242	1	PLCD1	0
chr6-27131293-27134844	2.93047e-07	-0.25127	0.114	0.204	0.0405782	HIST1H2BJ	0
chr5-173055347-173058060	1.08746e-05	-0.251364	0.127	0.222	1	CREBRF	0
chr3-31531333-31534701	2.06027e-05	-0.251511	0.138	0.233	1	STT3B	0
chr8-133567276-133576404	0.0482242	-0.252222	0.203	0.287	1	ST3GAL1	0
chr8-143947872-143954294	0.0408452	-0.252476	0.162	0.252	1	PLEC	0
chr11-95229342-95233058	4.61778e-06	-0.252485	0.127	0.22	0.639425	SESN3	0
chr5-151078198-151084161	2.60067e-06	-0.252878	0.124	0.214	0.360114	TNIP1	0
chr5-75336022-75338986	2.80507e-10	-0.252957	0.102	0.208	3.88418e-05	HMGCR	0
chr13-30615430-30620067	5.56059e-06	-0.253108	0.129	0.228	0.769974	USPL1	0
chr1-6598588-6604325	0.00868297	-0.253248	0.167	0.256	1	KLHL21	0
chr3-185933776-185938741	3.13136e-06	-0.254019	0.106	0.2	0.433599	TRA2B	0
chr11-106076416-106078585	6.58806e-09	-0.254324	0.109	0.209	0.000912249	AASDHPPT	0
chr9-99818646-99825899	0.0618093	-0.254365	0.272	0.365	1	NR4A3	0
chr5-179697661-179700850	7.68887e-06	-0.254624	0.119	0.21	1	CANX	0
chr1-179953591-179956353	1.00323e-08	-0.254661	0.105	0.2	0.00138917	CEP350	0
chr16-67561036-67564627	4.45937e-05	-0.255154	0.127	0.222	1	CTCF	0
chr19-10283100-10293910	0.402731	-0.255218	0.157	0.229	1	ICAM1	0
chr22-41443314-41449878	0.00116572	-0.255455	0.201	0.293	1	TOB2	0
chr11-61961491-61970564	0.010257	-0.255522	0.135	0.218	1	FTH1	0
chr18-51193893-51198790	0.000212133	-0.255664	0.162	0.249	1	MEX3C	0
chr18-80032975-80035373	5.25089e-07	-0.255798	0.114	0.209	0.072709	RP11-795F19.5	0
chr1-154998937-155008820	0.00709047	-0.256482	0.164	0.251	1	ZBTB7B	0
chr16-67243561-67249346	0.00591972	-0.257013	0.144	0.231	1	SLC9A5	0
chr13-97432204-97436282	0.000372796	-0.257185	0.187	0.286	1	RAP2A	0
chr19-40748337-40753438	3.00971e-05	-0.257693	0.118	0.211	1	SNRPA	0
chr5-154856953-154860949	2.92127e-05	-0.258131	0.124	0.215	1	CNOT8	0
chr1-156100129-156107783	4.65175e-05	-0.25879	0.135	0.228	1	LMNA	0
chr16-50740578-50745786	1.30187e-05	-0.259187	0.148	0.244	1	CYLD	0
chr5-176387534-176389836	2.33694e-08	-0.259438	0.109	0.206	0.00323596	NOP16	0
chr16-1609943-1615262	0.000134316	-0.259612	0.113	0.205	1	CRAMP1	0
chr8-100947442-100954214	0.00161621	-0.259965	0.209	0.316	1	YWHAZ	0
chr4-17576256-17581318	0.000155884	-0.259994	0.126	0.216	1	LAP3	0
chr1-198155295-198159858	9.18283e-06	-0.260037	0.122	0.213	1	NEK7	0
chr2-70083145-70090368	0.0003401	-0.260813	0.132	0.223	1	PCBP1	0
chr22-40042393-40045937	8.37861e-08	-0.260825	0.118	0.22	0.0116019	TNRC6B	0
chr19-43752908-43758009	0.000103675	-0.26093	0.122	0.219	1	SMG9	0
chr1-244833534-244838177	0.000111254	-0.261355	0.128	0.214	1	COX20	0
chr1-45582684-45587239	5.32065e-06	-0.261421	0.126	0.221	0.73675	NASP	0
chr3-36991993-36994801	2.78908e-06	-0.262436	0.168	0.264	0.386204	EPM2AIP1	0
chr2-54570746-54576329	3.88459e-09	-0.26248	0.106	0.2	0.000537899	SPTBN1	0
chr1-181086758-181093318	5.4197e-05	-0.262666	0.145	0.242	1	IER5	0
chr15-89087503-89092024	4.27157e-07	-0.262728	0.113	0.211	0.0591484	ABHD2	0
chr1-212284407-212287395	5.26511e-07	-0.263164	0.119	0.216	0.072906	PPP2R5A	0
chr11-62537347-62550144	0.0483778	-0.26343	0.223	0.319	1	AHNAK	0
chr5-140400164-140404094	0.000242381	-0.263462	0.191	0.29	1	ANKHD1	0
chr12-45989246-45992467	2.29557e-06	-0.263608	0.111	0.209	0.317868	SCAF11	0
chr16-53501190-53505074	8.64131e-07	-0.263784	0.126	0.223	0.119656	AKTIP	0
chr6-26155278-26160623	8.2554e-05	-0.263942	0.148	0.248	1	HIST1H2BD	0
chr10-43403082-43411961	0.00084403	-0.264342	0.147	0.234	1	HNRNPF	0
chr12-89706955-89710769	2.23732e-05	-0.26454	0.118	0.208	1	ATP2B1	0
chr6-31734275-31741242	0.0144917	-0.264582	0.166	0.257	1	CLIC1	0
chr4-2260583-2263721	2.29869e-08	-0.264664	0.105	0.206	0.003183	MXD4	0
chr2-128026539-128029371	1.93836e-06	-0.26485	0.127	0.225	0.268405	SAP130	0
chr8-100718712-100723381	3.9584e-05	-0.264867	0.14	0.238	1	PABPC1	0
chr9-3524289-3529083	5.98453e-07	-0.264906	0.158	0.266	0.0828678	RFX3	0
chr1-67682485-67687318	3.02799e-05	-0.265233	0.154	0.258	1	GADD45A	0
chr4-99948732-99951504	1.28726e-08	-0.265474	0.101	0.204	0.00178247	H2AFZ	0
chr1-85274911-85277586	1.81537e-07	-0.265925	0.105	0.206	0.0251374	BCL10	0
chr1-150627738-150630938	1.42189e-06	-0.265941	0.125	0.218	0.19689	ENSA	0
chr12-56115663-56120600	5.80316e-06	-0.266004	0.153	0.253	0.803564	ZC3H10	0
chr4-102824468-102829783	0.012097	-0.266092	0.254	0.35	1	UBE2D3	0
chr1-117059232-117062519	2.5925e-06	-0.266114	0.134	0.229	0.358983	TTF2	0
chr6-33248006-33250775	2.06981e-07	-0.266646	0.109	0.214	0.0286607	VPS52	0
chr2-63586573-63589960	7.54142e-10	-0.266687	0.103	0.205	0.000104426	MDH1	0
chr11-71786216-71788527	6.63459e-10	-0.266937	0.101	0.205	9.18692e-05	FAM86C1	0
chr3-9394745-9400254	0.00134126	-0.267168	0.215	0.321	1	SETD5	0
chr20-17679825-17683248	1.10852e-05	-0.267326	0.11	0.207	1	RRBP1	0
chr5-132494029-132501620	0.0455538	-0.267329	0.17	0.257	1	IRF1	3230
chr18-48936847-48953449	0.0598412	-0.267653	0.224	0.317	1	SMAD7	0
chr4-37684901-37687477	4.72543e-06	-0.268914	0.107	0.204	0.65433	RELL1	0
chr17-50864845-50868287	1.09521e-06	-0.270626	0.14	0.244	0.151654	TOB1	0
chr5-43312185-43314380	1.06438e-08	-0.270736	0.104	0.201	0.00147384	HMGCS1	0
chr6-35725356-35733433	2.13427e-05	-0.270955	0.13	0.229	1	FKBP5	0
chr20-41133645-41143705	1.60658e-07	-0.271152	0.109	0.202	0.0222463	PLCG1	0
chr2-130341488-130343729	6.16313e-06	-0.271242	0.115	0.211	0.853409	IMP4	0
chr6-2763837-2768789	2.52301e-06	-0.271444	0.106	0.2	0.349361	WRNIP1	0
chr2-68249935-68254044	6.2802e-07	-0.271587	0.118	0.215	0.086962	PPP3R1	0
chr19-11088892-11093571	2.65134e-07	-0.271766	0.102	0.2	0.036713	LDLR	0
chr2-55615072-55619332	6.52769e-08	-0.272472	0.133	0.24	0.00903889	PPP4R3B	0
chr1-45685312-45688939	9.22287e-08	-0.272899	0.127	0.23	0.0127709	TMEM69	0
chr4-56433814-56437997	1.62621e-06	-0.273241	0.146	0.25	0.225181	PAICS	0
chr17-45314090-45321528	0.00025562	-0.274058	0.17	0.273	1	MAP3K14	0
chr10-110917881-110921271	1.09429e-06	-0.27484	0.124	0.221	0.151527	BBIP1	0
chr1-183469996-183473688	5.78609e-07	-0.275001	0.122	0.227	0.08012	SMG7	0
chr1-93844168-93848507	3.99696e-08	-0.275497	0.102	0.204	0.00553459	BCAR3	0
chr6-31619724-31623140	8.89118e-08	-0.275827	0.105	0.203	0.0123116	PRRC2A	0
chr12-55972071-55975336	5.24504e-08	-0.275829	0.153	0.263	0.0072628	CDK2	0
chr2-231611171-231615675	0.000117178	-0.275855	0.113	0.206	1	C2orf57	16887
chr7-130892851-130906192	0.00706416	-0.277368	0.151	0.231	1	AC016831.7	0
chr7-100427903-100432737	1.32184e-06	-0.277369	0.129	0.229	0.183036	MEPCE	0
chr5-163502793-163507238	1.28487e-07	-0.27738	0.111	0.213	0.0177916	MAT2B	0
chr22-37606870-37611602	4.13965e-07	-0.277666	0.112	0.206	0.0573218	GGA1	0
chr16-31457800-31461096	1.14631e-07	-0.277773	0.11	0.21	0.0158729	ARMC5	0
chr17-63621395-63623520	2.3248e-09	-0.277834	0.105	0.214	0.000321915	MAP3K3	0
chr16-89487728-89492432	3.50907e-07	-0.277843	0.127	0.231	0.0485901	ANKRD11	0
chr11-118434186-118439130	4.05974e-08	-0.277901	0.104	0.211	0.00562152	KMT2A	0
chr2-64748646-64752769	0.000123541	-0.278208	0.182	0.28	1	SERTAD2	0
chr18-62521335-62527875	8.15718e-07	-0.278247	0.148	0.251	0.112952	ZCCHC2	0
chr2-99335397-99338689	5.86767e-06	-0.278378	0.114	0.21	0.812496	EIF5B	0
chr2-170928102-170930944	3.47196e-09	-0.278444	0.101	0.202	0.000480762	GORASP2	0
chr17-63772366-63776247	1.76719e-07	-0.278456	0.108	0.209	0.0244703	DDX42	0
chr16-29804103-29812666	7.66739e-05	-0.278471	0.156	0.263	1	MAZ	0
chr13-51450914-51455229	9.93827e-08	-0.278532	0.111	0.217	0.0137615	INTS6	0
chr3-71061996-71068549	1.13432e-07	-0.279592	0.107	0.205	0.015707	FOXP1	0
chr4-77817427-77822285	6.90857e-07	-0.279827	0.146	0.25	0.095663	CNOT6L	0
chr1-93177981-93181871	9.10515e-10	-0.280742	0.113	0.218	0.000126079	CCDC18	0
chr1-8873339-8881032	0.000232968	-0.280765	0.166	0.265	1	ENO1	0
chr20-5125945-5129024	4.18082e-08	-0.281106	0.111	0.213	0.00578918	CDS2	0
chr22-30422540-30427255	7.67209e-07	-0.281339	0.104	0.203	0.106235	MTFP1	0
chr11-64238928-64243787	1.47544e-06	-0.281794	0.124	0.227	0.204304	FKBP2	0
chr1-65419466-65424729	1.46884e-05	-0.282119	0.141	0.235	1	LEPROT	0
chr1-36223072-36225568	6.3788e-09	-0.282252	0.108	0.208	0.000883272	THRAP3	0
chr4-26318607-26323394	4.76768e-05	-0.2823	0.175	0.275	1	RBPJ	0
chr18-9135292-9138817	2.66706e-06	-0.282513	0.111	0.21	0.369308	ANKRD12	0
chr5-109408648-109412167	9.17664e-05	-0.282635	0.134	0.236	1	PJA2	0
chr12-53498382-53502138	8.90083e-09	-0.283341	0.127	0.236	0.0012325	TARBP2	0
chr1-77975118-77980472	3.51509e-09	-0.283881	0.135	0.246	0.000486735	FUBP1	0
chr15-92881006-92885332	2.17566e-09	-0.284156	0.102	0.209	0.000301264	RP11-437B10.1	0
chr4-145176560-145181389	3.98045e-08	-0.284667	0.118	0.225	0.00551173	OTUD4	0
chr2-135529937-135532522	4.44931e-07	-0.285179	0.169	0.268	0.0616096	ZRANB3	0
chr2-74456931-74459598	5.67665e-11	-0.285449	0.106	0.216	7.86046e-06	INO80B-WBP1	0
chr12-49740879-49743311	2.66458e-11	-0.285538	0.099	0.21	3.68964e-06	TMBIM6	0
chr11-86066300-86070265	1.15412e-08	-0.285664	0.097	0.205	0.00159811	PICALM	0
chr19-40776761-40779358	4.80003e-06	-0.285967	0.144	0.241	0.66466	RAB4B	0
chr1-172531839-172534677	8.65875e-07	-0.286264	0.146	0.252	0.119898	SUCO	0
chr2-97662422-97664976	5.56417e-10	-0.286338	0.1	0.205	7.70471e-05	ACTR1B	0
chr14-49998781-50004787	0.000235926	-0.286516	0.192	0.292	1	LINC01588	0
chr7-151057374-151061501	1.06181e-08	-0.286812	0.104	0.208	0.00147029	CDK5	0
chr19-38898219-38900997	9.54872e-11	-0.287001	0.094	0.201	1.32221e-05	NFKBIB	0
chr13-19957026-19962284	1.41468e-06	-0.287015	0.15	0.255	0.19589	ZMYM2	0
chr19-48991962-48994497	3.25609e-09	-0.287035	0.095	0.2	0.00045087	RUVBL2	0
chr17-59153498-59156272	2.97538e-07	-0.287071	0.15	0.253	0.0412	SKA2	0
chr11-108220911-108225688	9.47973e-08	-0.287462	0.138	0.242	0.0131266	NPAT	0
chr7-107167358-107170755	5.49416e-05	-0.287639	0.211	0.313	1	HBP1	0
chr19-18191479-18195249	1.12738e-09	-0.288036	0.099	0.205	0.000156108	MPV17L2	0
chr12-45725637-45731561	0.000584419	-0.288821	0.175	0.277	1	ARID2	0
chr10-62814690-62819850	1.5751e-07	-0.288831	0.118	0.216	0.0218105	EGR2	0
chr4-183503400-183507329	2.57544e-07	-0.288981	0.157	0.266	0.0356621	ING2	0
chr4-184472103-184477299	8.43996e-09	-0.289113	0.115	0.226	0.00116868	IRF2	0
chr20-33992343-33996224	3.55295e-06	-0.289517	0.153	0.267	0.491977	RALY	0
chr3-50333939-50341980	1.67733e-06	-0.289991	0.12	0.223	0.232261	RASSF1	0
chr19-14414796-14420005	3.24537e-10	-0.290709	0.093	0.201	4.49387e-05	DDX39A	0
chr2-112053804-112057333	2.90978e-07	-0.290792	0.141	0.251	0.0402918	TMEM87B	0
chr11-65856353-65861472	6.34505e-07	-0.290949	0.166	0.281	0.0878599	CFL1	0
chr17-47648620-47651214	7.12102e-07	-0.291123	0.12	0.224	0.0986047	KPNB1	0
chr15-52677313-52680387	1.32142e-08	-0.291632	0.102	0.205	0.00182977	FAM214A	0
chr17-35241486-35245758	9.45218e-10	-0.291752	0.105	0.21	0.000130884	SLFN5	0
chr6-36675952-36681244	1.38191e-06	-0.291788	0.1	0.202	0.191353	CDKN1A	0
chr1-9908893-9911447	9.83817e-11	-0.292235	0.107	0.218	1.36229e-05	CTNNBIP1	0
chr3-143970631-143975919	6.65876e-07	-0.292404	0.152	0.262	0.0922038	C3orf58	0
chr10-87860095-87866095	2.91155e-08	-0.292528	0.103	0.206	0.00403163	KLLN	0
chr11-62551455-62559686	0.00171295	-0.29293	0.203	0.315	1	EEF1G	0
chr11-63836986-63842079	6.68648e-11	-0.293938	0.096	0.206	9.25877e-06	MARK2	0
chr19-4470856-4472609	1.43027e-13	-0.294056	0.104	0.217	1.9805e-08	CTB-50L17.10	0
chr16-31873138-31878665	1.43597e-05	-0.294253	0.126	0.234	1	ZNF267	0
chr1-11802510-11807357	5.1898e-07	-0.294471	0.104	0.206	0.0718631	MTHFR	0
chr1-36384442-36388275	1.83027e-05	-0.294617	0.161	0.267	1	STK40	0
chr17-48891442-48893893	4.58932e-09	-0.295009	0.101	0.204	0.000635483	ATP5G1	0
chr16-79598022-79603113	3.74074e-09	-0.295426	0.097	0.201	0.00051798	MAF	0
chr15-68815563-68822522	2.79448e-08	-0.295728	0.095	0.202	0.00386951	ANP32A	0
chr5-143398869-143406052	1.58705e-06	-0.295864	0.148	0.26	0.219758	NR3C1	0
chr6-42744558-42748126	9.84508e-09	-0.295975	0.111	0.213	0.00136325	TBCC	0
chr11-57666470-57669400	3.29128e-10	-0.296371	0.118	0.227	4.55744e-05	ZDHHC5	0
chr2-88626193-88628680	2.51227e-08	-0.296454	0.131	0.242	0.00347874	EIF2AK3	0
chr15-44726080-44731215	1.15184e-06	-0.296887	0.172	0.279	0.159495	TRIM69	0
chr11-75812916-75817427	1.49523e-08	-0.29692	0.12	0.234	0.00207045	UVRAG	0
chr16-587738-590739	4.86315e-12	-0.297	0.092	0.205	6.734e-07	RAB40C	0
chr19-55383383-55387780	1.77612e-11	-0.297544	0.091	0.203	2.4594e-06	RPL28	0
chr5-181221291-181225331	9.81263e-11	-0.297771	0.093	0.206	1.35876e-05	TRIM41	0
chr1-154970500-154976430	0.00010979	-0.297841	0.184	0.292	1	SHC1	0
chr6-85640850-85645755	2.01417e-08	-0.297922	0.137	0.247	0.00278901	SYNCRIP	0
chr11-95788667-95792236	4.03844e-08	-0.297949	0.159	0.274	0.00559203	FAM76B	0
chr16-30367462-30371708	2.9687e-07	-0.298137	0.151	0.259	0.0411076	TBC1D10B	0
chr16-88451702-88457554	3.52619e-09	-0.298233	0.117	0.221	0.000488271	ZFPM1	0
chr6-30678896-30689188	0.00884956	-0.299567	0.201	0.304	1	PPP1R18	0
chr4-87005170-87010188	1.32271e-09	-0.300127	0.101	0.213	0.000183156	AFF1	0
chr19-40463144-40467372	4.81748e-10	-0.300565	0.102	0.214	6.67077e-05	BLVRB	0
chr20-17965021-17973994	1.02658e-05	-0.300617	0.138	0.241	1	SNX5	0
chr6-159788342-159791654	2.42553e-08	-0.300791	0.105	0.206	0.00335864	TCP1	0
chr5-40677963-40682999	2.94847e-08	-0.300815	0.101	0.209	0.00408275	PTGER4	0
chr5-150409375-150413923	1.82003e-09	-0.300863	0.131	0.247	0.00025202	CD74	0
chr19-15377624-15381008	3.85744e-12	-0.301003	0.092	0.204	5.3414e-07	AKAP8	0
chr1-244652180-244654933	7.12323e-12	-0.30101	0.091	0.2	9.86353e-07	DESI2	0
chr6-290372-293962	3.43235e-08	-0.30181	0.098	0.205	0.00475277	DUSP22	0
chr16-58627779-58630991	1.0992e-08	-0.301816	0.125	0.229	0.00152206	CNOT1	0
chr19-45583727-45585607	6.1598e-12	-0.30202	0.101	0.218	8.52947e-07	OPA3	0
chr1-167934618-167938441	9.03579e-09	-0.302287	0.13	0.235	0.00125119	DCAF6	0
chr1-11907590-11911180	6.03149e-11	-0.303047	0.097	0.214	8.35181e-06	KIAA2013	8410
chr5-179816721-179823336	4.05876e-06	-0.303973	0.108	0.211	0.562017	SQSTM1	0
chr5-163458959-163462891	2.29138e-08	-0.304023	0.127	0.232	0.00317287	NUDCD2	0
chr8-42151815-42156540	4.69991e-09	-0.304389	0.134	0.245	0.000650797	AP3M2	0
chr11-67504091-67509164	1.67018e-06	-0.304437	0.151	0.264	0.23127	PITPNM1	0
chr11-62838828-62842800	7.43764e-07	-0.30448	0.18	0.295	0.102989	WDR74	0
chr5-119328347-119342621	1.27552e-08	-0.304551	0.132	0.241	0.00176621	TNFAIP8	0
chr6-42043958-42051554	4.14962e-09	-0.304666	0.105	0.208	0.000574598	TAF8	0
chr17-77318478-77326265	0.010139	-0.305891	0.121	0.21	1	SEPT9	0
chr3-39145777-39154831	0.00903762	-0.306442	0.258	0.363	1	CSRNP1	0
chr6-32194907-32198436	5.19892e-11	-0.307305	0.09	0.205	7.19895e-06	NOTCH4	0
chr4-113759706-113763325	7.09816e-10	-0.307306	0.117	0.226	9.82883e-05	CAMK2D	0
chr17-75853331-75856663	1.19269e-10	-0.307794	0.092	0.2	1.65152e-05	WBP2	0
chr2-43223611-43229998	2.0558e-08	-0.308118	0.114	0.223	0.00284666	ZFP36L2	0
chr11-72812646-72816155	1.84647e-09	-0.308634	0.105	0.219	0.000255681	ATG16L2	0
chr17-81858361-81861983	1.00238e-11	-0.308729	0.098	0.218	1.388e-06	P4HB	0
chr11-64874149-64881959	1.02941e-08	-0.30883	0.118	0.229	0.00142543	EHD1	0
chr7-112203869-112207682	1.80449e-10	-0.309061	0.088	0.202	2.49868e-05	ZNF277	0
chr13-49443178-49445994	6.66317e-10	-0.309307	0.148	0.261	9.22649e-05	CAB39L	0
chr22-38704526-38707829	2.3443e-10	-0.309321	0.143	0.258	3.24616e-05	GTPBP1	0
chr2-61535912-61539588	2.57547e-08	-0.30938	0.175	0.298	0.00356625	XPO1	0
chr19-14136038-14138071	1.21036e-10	-0.309443	0.107	0.227	1.67598e-05	ASF1B	0
chr7-143378757-143386787	7.08054e-10	-0.31017	0.1	0.208	9.80443e-05	ZYX	0
chr6-109379919-109384940	1.8574e-12	-0.310791	0.085	0.202	2.57194e-07	CD164	0
chr12-124912773-124922214	0.00940141	-0.311593	0.304	0.408	1	UBC	0
chr17-17970741-17973335	8.63049e-14	-0.311802	0.094	0.207	1.19506e-08	TOM1L2	0
chr2-28389344-28397142	0.000720574	-0.311864	0.229	0.342	1	FOSL2	0
chr22-41284414-41287210	2.46038e-12	-0.312265	0.11	0.229	3.40688e-07	RANGAP1	0
chr20-35952748-35955412	1.7977e-13	-0.31303	0.09	0.208	2.48928e-08	CNBD2	0
chr2-69913755-69916336	3.66668e-09	-0.313438	0.12	0.236	0.000507725	MXD1	0
chr1-179881559-179884297	5.99983e-12	-0.313968	0.11	0.235	8.30797e-07	TOR1AIP1	0
chr12-92129670-92148008	0.000664491	-0.313988	0.308	0.413	1	BTG1	0
chr19-52188650-52191312	4.5088e-13	-0.314188	0.099	0.215	6.24334e-08	PPP2R1A	0
chr6-41071419-41074863	1.24375e-06	-0.314695	0.14	0.249	0.172222	OARD1	0
chr5-151770166-151774122	2.23918e-08	-0.314718	0.181	0.306	0.00310059	ATOX1	0
chr8-25457091-25460961	7.66025e-13	-0.314996	0.115	0.237	1.06071e-07	KCTD9	0
chr5-98926991-98930358	3.91365e-11	-0.317053	0.123	0.237	5.41923e-06	CHD1	0
chr22-42612794-42616547	1.1406e-10	-0.317269	0.098	0.21	1.57939e-05	POLDIP3	0
chr10-61898993-61905318	5.90595e-13	-0.317372	0.089	0.204	8.17797e-08	ARID5B	0
chr15-45197560-45201850	9.93195e-09	-0.317597	0.114	0.229	0.00137528	SHF	0
chr15-63500282-63507366	3.27855e-05	-0.318017	0.159	0.268	1	USP3	0
chr1-113903691-113907244	2.65119e-11	-0.318684	0.101	0.222	3.6711e-06	AP4B1	0
chr6-20400240-20405122	2.01499e-06	-0.318993	0.154	0.268	0.279016	E2F3	0
chr2-231461591-231465711	4.38513e-13	-0.319048	0.084	0.201	6.07209e-08	NCL	0
chr11-6233754-6235720	7.02417e-13	-0.319157	0.1	0.223	9.72637e-08	CNGA4	0
chr19-45638279-45643957	1.31219e-10	-0.320516	0.109	0.225	1.81698e-05	EML2	0
chr5-61327650-61335408	4.71156e-07	-0.320527	0.139	0.253	0.0652409	ZSWIM6	0
chr17-58516655-58519928	3.08178e-10	-0.321582	0.139	0.258	4.26734e-05	MTMR4	0
chr18-3446415-3455126	0.000388158	-0.321672	0.204	0.32	1	TGIF1	0
chr10-58265837-58270064	1.33858e-12	-0.321922	0.09	0.207	1.85353e-07	IPMK	0
chr6-27836553-27840118	4.50684e-12	-0.322467	0.1	0.221	6.24062e-07	HIST1H2AK	0
chr6-43170195-43175275	1.38897e-06	-0.323084	0.17	0.286	0.192331	SRF	0
chr1-151280853-151284405	1.39299e-08	-0.323684	0.148	0.269	0.00192887	ZNF687	0
chr11-67238766-67242754	1.52752e-12	-0.324512	0.103	0.224	2.11516e-07	KDM2A	0
chr17-80258166-80266370	4.22924e-12	-0.324619	0.099	0.216	5.85623e-07	RNF213	0
chr1-167219455-167223024	6.80557e-11	-0.325091	0.11	0.23	9.42367e-06	POU2F1	0
chr12-57519305-57524626	1.0402e-08	-0.325187	0.127	0.244	0.00144036	MBD6	0
chr1-58777289-58787125	1.53501e-05	-0.325315	0.243	0.366	1	JUN	0
chr6-89078926-89083582	3.78902e-12	-0.326278	0.098	0.215	5.24666e-07	PNRC1	0
chr13-51801586-51806910	2.57265e-11	-0.327167	0.118	0.233	3.56234e-06	DHRS12	0
chr7-104940502-104946792	7.96243e-11	-0.327436	0.132	0.254	1.10256e-05	RP11-325F22.2	0
chr2-86440456-86443623	3.21174e-12	-0.327634	0.105	0.225	4.4473e-07	KDM3A	0
chr22-24553580-24557091	3.65634e-13	-0.328097	0.088	0.204	5.06294e-08	GUCD1	0
chr1-235326538-235330659	9.2043e-10	-0.328569	0.135	0.256	0.000127452	ARID4B	0
chr1-37471059-37482221	0.00878204	-0.328627	0.244	0.358	1	ZC3H12A	0
chr17-43168815-43172646	1.64567e-14	-0.329086	0.087	0.21	2.27876e-09	BRCA1	0
chr11-65610908-65616917	2.79993e-09	-0.329124	0.14	0.265	0.000387706	MAP3K11	0
chr11-9459440-9462655	4.83502e-13	-0.330477	0.103	0.218	6.69505e-08	ZNF143	0
chr6-158867713-158870763	1.01185e-18	-0.330788	0.086	0.208	1.40111e-13	C6orf99	0
chr11-65571815-65578192	1.15251e-08	-0.330936	0.121	0.238	0.00159588	EHBP1L1	0
chr2-218269209-218273309	6.09618e-14	-0.332096	0.095	0.222	8.44138e-09	AAMP	0
chr7-130908510-130919681	4.55246e-08	-0.332246	0.168	0.284	0.0063038	AC016831.7	0
chr15-44710060-44717264	8.64207e-13	-0.332439	0.108	0.227	1.19667e-07	B2M	0
chr1-26692039-26698769	5.55005e-09	-0.332798	0.122	0.241	0.000768516	ARID1A	0
chr12-103928306-103931938	4.86832e-13	-0.332854	0.131	0.26	6.74116e-08	HSP90B1	0
chr2-207162966-207167876	2.36646e-07	-0.332961	0.116	0.227	0.0327684	KLF7	0
chr1-228161320-228167069	1.43292e-10	-0.333	0.118	0.241	1.98417e-05	IBA57	0
chr19-47225690-47233406	6.53714e-07	-0.333321	0.137	0.243	0.0905198	BBC3	0
chr19-49765343-49767948	9.75004e-15	-0.333415	0.104	0.233	1.35009e-09	AP2A1	0
chr1-110337507-110342254	8.70658e-08	-0.334034	0.195	0.312	0.012056	RBM15	0
chr1-174998414-175001607	3.75117e-11	-0.334157	0.117	0.236	5.19424e-06	CACYBP	0
chr2-177263194-177266839	5.44332e-19	-0.334212	0.068	0.202	7.53736e-14	NFE2L2	0
chr17-47894881-47897706	9.77612e-12	-0.334342	0.108	0.226	1.3537e-06	SP2	0
chr19-38335380-38337643	2.14369e-12	-0.334851	0.114	0.238	2.96836e-07	CATSPERG	0
chr13-31159023-31163241	1.82595e-10	-0.335106	0.132	0.248	2.5284e-05	HSPH1	0
chr7-139339853-139342350	1.5663e-16	-0.33598	0.078	0.201	2.16886e-11	C7orf55-LUC7L2	0
chr1-15831782-15837897	7.24298e-09	-0.336702	0.139	0.265	0.00100294	SPEN	9966
chr10-102501219-102505371	1.62089e-12	-0.33693	0.13	0.262	2.24444e-07	ACTR1A	0
chr14-91241161-91246893	3.12587e-14	-0.336978	0.081	0.203	4.32839e-09	GPR68	0
chr6-26195114-26200488	2.38775e-11	-0.337181	0.117	0.233	3.30632e-06	RP1-34B20.21	0
chr6-151389264-151393312	4.59998e-14	-0.337206	0.097	0.22	6.36959e-09	ZBTB2	0
chr19-10565130-10569816	4.16927e-16	-0.337471	0.084	0.208	5.77319e-11	KRI1	0
chr21-42973437-42976239	6.82734e-15	-0.337482	0.08	0.2	9.45381e-10	PKNOX1	0
chr5-176533571-176538542	8.46384e-12	-0.337628	0.127	0.249	1.17199e-06	RNF44	0
chr15-65790718-65793366	3.33052e-15	-0.337714	0.085	0.211	4.61177e-10	DENND4A	0
chr10-30432741-30438767	7.87804e-13	-0.338456	0.086	0.206	1.09087e-07	MAP3K8	0
chr17-45146713-45150577	1.96815e-14	-0.338661	0.094	0.22	2.7253e-09	HEXIM1	0
chr17-7685358-7689054	1.29257e-13	-0.340167	0.086	0.21	1.78982e-08	WRAP53	0
chr2-195655785-195660657	2.15338e-14	-0.340433	0.088	0.212	2.98179e-09	SLC39A10	0
chr10-1047895-1050985	1.22609e-15	-0.341229	0.079	0.2	1.69777e-10	IDI1	0
chr5-96932795-96937835	8.19586e-12	-0.341542	0.123	0.249	1.13488e-06	LNPEP	0
chr21-33541294-33544079	6.12089e-14	-0.341807	0.097	0.222	8.47559e-09	SON	0
chr10-130109030-130112226	6.9684e-15	-0.342187	0.104	0.233	9.64915e-10	LINC00959	0
chr19-42279182-42286005	2.57805e-12	-0.34237	0.126	0.252	3.56983e-07	CIC	0
chr16-81003522-81008602	2.98411e-12	-0.342997	0.099	0.218	4.1321e-07	CMC2	0
chr1-6783903-6786586	3.2227e-13	-0.344569	0.108	0.229	4.46248e-08	CAMTA1	0
chr12-25384972-25388847	4.30542e-15	-0.345362	0.1	0.227	5.96171e-10	RP11-707G18.1	0
chr7-130954206-130962748	8.969e-17	-0.345568	0.087	0.209	1.24194e-11	RP11-138A9.2	14544
chr2-47904104-47907799	9.95986e-14	-0.345583	0.099	0.225	1.37914e-08	FBXO11	0
chr11-64303365-64307195	2.09075e-14	-0.34563	0.084	0.206	2.89506e-09	TEX40	0
chr19-2092064-2097769	5.76484e-11	-0.345857	0.085	0.201	7.98257e-06	IZUMO4	0
chr20-35615345-35620194	1.71592e-09	-0.346082	0.139	0.265	0.000237604	SPAG4	0
chr14-68788587-68797338	0.00014837	-0.34684	0.232	0.352	1	ZFP36L1	0
chr2-30145825-30148668	8.26102e-14	-0.347258	0.124	0.252	1.1439e-08	YPEL5	0
chr11-64776883-64779912	5.01036e-15	-0.347434	0.103	0.232	6.93785e-10	SF1	0
chr15-50906830-50910965	3.48252e-17	-0.347502	0.086	0.213	4.82225e-12	AP4E1	0
chr19-17074171-17080799	3.36551e-08	-0.348039	0.119	0.236	0.00466022	HAUS8	0
chr7-108524412-108527349	5.61256e-15	-0.348161	0.104	0.231	7.77172e-10	PNPLA8	0
chr19-45691498-45693758	1.69606e-14	-0.348218	0.089	0.214	2.34854e-09	QPCTL	0
chr2-177211261-177213937	1.25423e-17	-0.348336	0.071	0.2	1.73673e-12	HNRNPA3	0
chr3-38164391-38169629	3.19512e-12	-0.349208	0.128	0.256	4.42428e-07	OXSR1	0
chr2-196166781-196174905	9.63341e-17	-0.351092	0.081	0.207	1.33394e-11	STK17B	0
chr6-134167583-134178928	3.59255e-08	-0.351373	0.112	0.226	0.0049746	SGK1	0
chr6-157760307-157765349	5.17514e-12	-0.351519	0.106	0.232	7.16602e-07	SNX9	0
chr2-197498532-197501570	2.26367e-18	-0.351535	0.075	0.203	3.1345e-13	HSPE1-MOB4	0
chr10-50621686-50625986	3.70043e-12	-0.351779	0.084	0.205	5.12399e-07	SGMS1	0
chr2-156340372-156343815	3.46662e-17	-0.351946	0.07	0.2	4.80023e-12	NR4A2	0
chr3-115145756-115148637	2.25382e-09	-0.35215	0.177	0.303	0.000312087	ZBTB20	0
chr17-76263999-76268982	2.06326e-13	-0.352628	0.088	0.214	2.857e-08	UBALD2	0
chr5-177425431-177432511	1.1988e-11	-0.352763	0.148	0.278	1.65998e-06	GRK6	0
chr6-12008023-12014479	8.51887e-12	-0.352939	0.142	0.285	1.17961e-06	HIVEP1	0
chr19-44889936-44891840	1.44218e-14	-0.353267	0.11	0.239	1.99699e-09	TOMM40	0
chr20-35739348-35744500	1.57515e-13	-0.353733	0.102	0.233	2.18111e-08	RBM39	0
chr12-750806-756038	2.86348e-11	-0.3549	0.125	0.251	3.96506e-06	WNK1	0
chr20-49275447-49280220	8.78573e-11	-0.35567	0.13	0.257	1.21656e-05	ZNFX1	0
chr8-30080985-30084079	2.73228e-20	-0.35598	0.074	0.206	3.78339e-15	SARAF	0
chr11-44563946-44570985	6.32881e-11	-0.356431	0.121	0.24	8.76351e-06	CD82	0
chr19-18519239-18523091	2.3982e-11	-0.356669	0.109	0.23	3.32079e-06	ELL	0
chr2-44167252-44171780	5.71542e-11	-0.356753	0.192	0.331	7.91414e-06	PPM1B	0
chr19-9818269-9820215	6.81608e-19	-0.357735	0.071	0.202	9.43822e-14	FBXL12	0
chr19-6423406-6425984	4.40396e-16	-0.357862	0.104	0.235	6.09816e-11	KHSRP	0
chr17-76734297-76739403	2.08732e-14	-0.358104	0.097	0.222	2.89031e-09	MFSD11	0
chr11-64184455-64187612	3.90413e-15	-0.358162	0.106	0.237	5.40605e-10	STIP1	0
chr2-173962738-173966503	7.41886e-15	-0.358212	0.102	0.23	1.02729e-09	SP3	0
chr21-33641087-33644825	7.84086e-14	-0.359478	0.129	0.263	1.08572e-08	CRYZL1	0
chr6-24717676-24722124	5.3544e-11	-0.359779	0.119	0.244	7.41423e-06	C6orf62	0
chr6-26122354-26127397	3.18994e-16	-0.360093	0.104	0.237	4.4171e-11	HIST1H2AC	0
chr19-49675557-49679655	8.44524e-11	-0.360896	0.132	0.262	1.16941e-05	PRMT1	0
chr2-218395509-218402121	2.44622e-10	-0.360934	0.105	0.231	3.38727e-05	CTDSP1	0
chr11-65496431-65511284	0.00331021	-0.361734	0.256	0.378	1	AP000769.1	0
chr19-49637661-49643924	1.51812e-08	-0.363255	0.177	0.307	0.00210215	RRAS	0
chr17-28725303-28729513	8.86896e-12	-0.364173	0.118	0.252	1.22808e-06	TLCD1	0
chr11-692621-698679	6.92188e-15	-0.366402	0.106	0.244	9.58473e-10	TMEM80	0
chr6-110813895-110816889	3.52289e-19	-0.366702	0.075	0.207	4.87815e-14	CDK19	0
chr1-159920868-159926726	1.19332e-09	-0.367207	0.154	0.286	0.000165239	TAGLN2	0
chr13-74131902-74136925	9.60101e-22	-0.368545	0.075	0.207	1.32945e-16	LINC00402	94531
chr17-7306557-7309537	2.00194e-15	-0.368545	0.078	0.206	2.77209e-10	EIF5A	0
chr1-150233225-150236791	6.89164e-18	-0.369251	0.088	0.222	9.54286e-13	ANP32E	0
chr16-30921481-30925475	7.34278e-11	-0.369363	0.158	0.293	1.01676e-05	FBXL19	0
chr1-234602626-234613919	9.59277e-07	-0.370067	0.24	0.376	0.132831	IRF2BP2	0
chr2-175167047-175169329	5.31125e-20	-0.370244	0.084	0.227	7.35448e-15	ATF2	0
chr6-142942764-142948313	1.69808e-13	-0.370362	0.101	0.236	2.35134e-08	HIVEP2	0
chr1-203286112-203291649	1.05272e-11	-0.371609	0.124	0.257	1.4577e-06	LINC01353	0
chr19-45177562-45180072	2.95203e-18	-0.371946	0.113	0.256	4.08768e-13	AC005779.2	0
chr11-96338075-96343914	5.74017e-17	-0.372178	0.079	0.212	7.94841e-12	MAML2	0
chr7-55531605-55539935	4.85959e-12	-0.372524	0.101	0.23	6.72908e-07	VOPP1	0
chr2-197452612-197454473	1.39949e-19	-0.372541	0.081	0.222	1.93787e-14	COQ10B	0
chr19-55598696-55601669	2.06843e-19	-0.372701	0.067	0.201	2.86415e-14	FIZ1	0
chr19-55338258-55341630	1.55817e-13	-0.373667	0.152	0.296	2.15759e-08	KMT5C	0
chr16-11250037-11259633	1.3508e-14	-0.373751	0.137	0.279	1.87046e-09	SOCS1	0
chr19-48632601-48639253	1.0226e-12	-0.373967	0.127	0.263	1.41599e-07	DBP	0
chr19-42241810-42245387	8.69507e-14	-0.374073	0.121	0.26	1.20401e-08	GSK3A	0
chr2-148642917-148646539	3.52379e-20	-0.375872	0.07	0.204	4.87939e-15	EPC2	0
chr19-2474448-2480130	2.9224e-12	-0.376062	0.09	0.221	4.04665e-07	GADD45B	0
chr17-8185456-8190836	1.84057e-18	-0.377089	0.089	0.232	2.54863e-13	AC129492.1	0
chr12-4268353-4275914	2.01389e-15	-0.377657	0.109	0.237	2.78863e-10	CCND2	0
chr11-59614279-59616990	6.48171e-17	-0.377797	0.144	0.292	8.97523e-12	OSBP	0
chr19-41348187-41356163	1.52127e-19	-0.378215	0.071	0.21	2.10651e-14	TMEM91	0
chr2-43127095-43134846	6.90928e-18	-0.378831	0.088	0.226	9.56729e-13	AC093609.1	24403
chr17-41687763-41690224	7.50569e-22	-0.379881	0.065	0.2	1.03931e-16	EIF1	0
chr19-1247843-1254621	9.40245e-11	-0.380143	0.113	0.24	1.30196e-05	MIDN	0
chr17-18182430-18188834	4.08879e-19	-0.380906	0.075	0.212	5.66174e-14	ALKBH5	0
chr1-149884531-149889313	3.84808e-12	-0.380952	0.159	0.306	5.32844e-07	HIST2H2BE	0
chr19-5902881-5905473	6.24114e-15	-0.381092	0.138	0.278	8.6421e-10	NDUFA11	0
chr6-44245083-44260808	9.83367e-05	-0.381278	0.253	0.387	1	HSP90AB1	0
chr6-32175378-32179274	1.22448e-14	-0.381786	0.127	0.27	1.69554e-09	RNF5	0
chr6-15244513-15250200	3.70343e-12	-0.381889	0.133	0.266	5.12814e-07	JARID2	0
chr17-46190053-46195374	5.90688e-18	-0.382223	0.084	0.223	8.17926e-13	KANSL1	0
chr2-207527408-207531876	4.27234e-17	-0.382583	0.104	0.242	5.91591e-12	CREB1	0
chr19-53865180-53871935	8.2202e-18	-0.382669	0.075	0.207	1.13825e-12	MYADM	0
chr6-32966645-32975245	2.35631e-06	-0.383237	0.216	0.352	0.326278	BRD2	0
chr6-108557493-108563089	9.62582e-13	-0.383972	0.108	0.244	1.33289e-07	FOXO3	0
chr17-4966114-4970212	1.50854e-16	-0.384127	0.104	0.245	2.08888e-11	SPAG7	0
chr17-42386796-42390057	7.83341e-24	-0.385492	0.071	0.212	1.08469e-18	STAT3	0
chr19-10717063-10720025	3.46432e-19	-0.386279	0.099	0.244	4.79705e-14	DNM2	0
chr11-62725377-62730409	1.22594e-14	-0.386454	0.109	0.251	1.69756e-09	TTC9C	0
chr11-58576720-58580556	8.36549e-15	-0.386805	0.144	0.293	1.15837e-09	LPXN	0
chr17-7571932-7575702	2.46626e-21	-0.387315	0.079	0.218	3.41503e-16	SENP3-EIF4A1	0
chr10-110495643-110504916	3.93102e-12	-0.387515	0.12	0.262	5.44329e-07	DUSP5	0
chr1-30717656-30719840	5.96569e-21	-0.387721	0.085	0.227	8.26068e-16	MATN1	0
chr17-38867370-38872975	1.1602e-18	-0.389003	0.073	0.207	1.60654e-13	LASP1	0
chr11-35138280-35147266	2.28382e-11	-0.391777	0.141	0.273	3.16241e-06	CD44	0
chr1-156113083-156131066	0.00649991	-0.391985	0.302	0.423	1	LMNA	0
chr2-8676467-8683837	5.96491e-13	-0.392194	0.122	0.265	8.2596e-08	ID2	0
chr1-3899350-3901854	1.17972e-19	-0.392334	0.1	0.244	1.63356e-14	C1orf174	0
chr17-1713770-1718092	1.53109e-15	-0.392709	0.122	0.267	2.1201e-10	WDR81	0
chr7-155203066-155207150	1.81352e-22	-0.393202	0.071	0.211	2.51118e-17	AC099552.3	0
chr10-74824001-74827662	1.37917e-20	-0.393238	0.104	0.245	1.90974e-15	KAT6B	0
chr19-47109296-47114769	4.51818e-19	-0.393534	0.106	0.256	6.25633e-14	ZC3H4	0
chr9-114381884-114391388	1.53264e-15	-0.394779	0.116	0.25	2.12225e-10	AKNA	0
chr13-32425809-32429528	7.04028e-20	-0.395458	0.061	0.201	9.74868e-15	N4BP2L1	0
chr19-14380187-14386019	2.92931e-23	-0.396149	0.069	0.209	4.05621e-18	ADGRE5	0
chr6-30612198-30618801	5.23843e-16	-0.396535	0.113	0.253	7.25365e-11	MRPS18B	0
chr17-78126844-78134931	1.90511e-21	-0.396555	0.069	0.208	2.63801e-16	TMC8	0
chr19-54462144-54465463	1.33528e-15	-0.397871	0.102	0.24	1.84896e-10	LENG9	0
chr6-73518619-73522340	1.90193e-18	-0.397923	0.083	0.222	2.63361e-13	EEF1A1	0
chr14-105485541-105492484	1.8633e-11	-0.399443	0.205	0.349	2.58011e-06	AL928654.7	0
chr19-54136085-54138976	4.76108e-18	-0.399909	0.124	0.275	6.59267e-13	CNOT3	0
chr17-64496039-64508293	1.75466e-08	-0.401352	0.237	0.381	0.00242968	DDX5	0
chr6-16758183-16765012	3.56328e-17	-0.401494	0.118	0.264	4.93407e-12	ATXN1	0
chr15-72226133-72232779	2.13872e-10	-0.401955	0.178	0.318	2.96149e-05	PKM	0
chr15-31323887-31330865	9.51234e-16	-0.402231	0.127	0.28	1.31717e-10	KLF13	0
chr10-62045337-62051610	1.24271e-21	-0.402585	0.079	0.221	1.72078e-16	ARID5B	0
chr17-64973887-64976577	6.2749e-23	-0.402798	0.073	0.219	8.68885e-18	RP11-583F2.7	19709
chr5-91379632-91385336	9.74762e-16	-0.403866	0.165	0.316	1.34975e-10	ARRDC3	0
chr2-219277436-219280445	1.10202e-19	-0.40418	0.087	0.231	1.52597e-14	DNAJB2	0
chr2-219386850-219389168	4.33864e-19	-0.404914	0.079	0.225	6.00771e-14	DNPEP	0
chr17-14297147-14304265	2.14968e-17	-0.405113	0.119	0.269	2.97666e-12	HS3ST3B1	0
chr11-65414875-65433409	0.000284797	-0.406414	0.393	0.54	1	NEAT1	0
chr2-191675530-191680709	1.29849e-22	-0.40918	0.081	0.229	1.79802e-17	NABP1	0
chr7-155296548-155300067	4.12721e-19	-0.409354	0.107	0.252	5.71495e-14	INSIG1	0
chr2-190879655-190884759	3.13806e-20	-0.411486	0.092	0.232	4.34527e-15	GLS	0
chr3-133572240-133576444	8.14795e-17	-0.412132	0.12	0.264	1.12825e-11	CDV3	0
chr6-37168719-37174632	2.11712e-16	-0.412514	0.114	0.264	2.93158e-11	PIM1	0
chr9-120924515-120929812	7.35957e-17	-0.41498	0.084	0.22	1.01908e-11	TRAF1	0
chr12-108628159-108636308	1.13971e-20	-0.41504	0.097	0.243	1.57815e-15	SELPLG	0
chr19-55653359-55657819	3.93193e-20	-0.415364	0.098	0.253	5.44454e-15	U2AF2	0
chr10-99618775-99622131	1.03192e-23	-0.416312	0.097	0.255	1.4289e-18	SLC25A28	0
chr17-7011908-7016118	2.23115e-22	-0.41711	0.079	0.232	3.08948e-17	RNASEK	0
chr15-70094643-70102460	4.76503e-16	-0.417233	0.121	0.275	6.59813e-11	TLE3	0
chr19-14004725-14007374	1.15397e-24	-0.41729	0.071	0.224	1.5979e-19	RFX1	0
chr22-49959418-49968955	7.29762e-18	-0.418684	0.088	0.234	1.0105e-12	PIM3	0
chr2-239399317-239402342	3.74029e-27	-0.419839	0.067	0.222	5.17918e-22	HDAC4	0
chr2-156331551-156336132	1.10573e-18	-0.421948	0.107	0.266	1.53111e-13	NR4A2	0
chr3-187735813-187747308	2.47573e-09	-0.427612	0.169	0.315	0.000342814	RP11-211G3.2	0
chr16-30657168-30661511	5.2576e-17	-0.428186	0.173	0.335	7.28019e-12	FBRS	0
chr19-41321558-41329381	1.62897e-19	-0.429386	0.078	0.221	2.25564e-14	CCDC97	0
chr1-150558471-150580530	6.72433e-05	-0.429969	0.372	0.508	1	MCL1	0
chr19-6736039-6741649	1.42454e-16	-0.430071	0.115	0.271	1.97256e-11	GPR108	0
chr8-29345474-29354267	5.47086e-24	-0.430559	0.064	0.21	7.5755e-19	DUSP4	0
chr16-22188293-22193103	9.16835e-14	-0.430954	0.174	0.341	1.26954e-08	SDR42E2	0
chr16-88700100-88707620	1.84835e-29	-0.431705	0.058	0.207	2.55942e-24	CTU2	0
chr1-156498331-156505987	5.45417e-16	-0.431941	0.138	0.296	7.55239e-11	MEF2D	0
chr3-14431096-14435824	1.24415e-32	-0.432424	0.053	0.209	1.72278e-27	SLC6A6	0
chr17-7237106-7243618	5.24868e-21	-0.432441	0.072	0.221	7.26785e-16	PHF23	0
chr2-152715854-152719586	1.44508e-22	-0.434755	0.114	0.28	2.00101e-17	PRPF40A	0
chr19-42267626-42271591	4.03589e-15	-0.435959	0.161	0.315	5.5885e-10	CIC	0
chr17-7482965-7486612	2.0259e-32	-0.436052	0.049	0.206	2.80527e-27	POLR2A	0
chr14-22554594-22562679	1.16734e-29	-0.43643	0.062	0.208	1.61641e-24	AE000662.92	0
chr19-58572219-58576485	3.56323e-19	-0.436735	0.112	0.271	4.93401e-14	MZF1	0
chr10-102393582-102396578	4.12839e-23	-0.439132	0.078	0.231	5.71658e-18	NFKB2	0
chr19-49874687-49878867	4.41163e-20	-0.43942	0.128	0.291	6.10878e-15	TBC1D17	0
chr17-78349488-78361393	9.17905e-09	-0.440103	0.2	0.351	0.00127102	SOCS3	0
chr2-237690901-237698391	1.90068e-21	-0.442374	0.093	0.259	2.63188e-16	LRRFIP1	0
chr19-35898360-35905749	9.15385e-24	-0.442486	0.058	0.206	1.26753e-18	TYROBP	0
chr12-12714084-12727188	1.80245e-11	-0.444326	0.226	0.381	2.49585e-06	APOLD1	0
chr17-2395847-2402869	1.36755e-14	-0.445018	0.145	0.309	1.89365e-09	MNT	0
chr1-221735862-221744121	9.34448e-19	-0.445513	0.135	0.298	1.29393e-13	DUSP10	0
chr1-156133598-156158080	1.89867e-11	-0.446326	0.163	0.307	2.62909e-06	SEMA4A	0
chr19-12788369-12797313	9.41703e-12	-0.447337	0.2	0.36	1.30398e-06	PRDX2	0
chr19-18276994-18283171	1.45055e-19	-0.449031	0.111	0.272	2.00857e-14	JUND	0
chr19-38848262-38853207	2.19635e-20	-0.451366	0.155	0.328	3.04129e-15	HNRNPL	0
chr6-136287843-136291179	3.09925e-23	-0.452692	0.101	0.263	4.29153e-18	BCLAF1	0
chr17-4944055-4950688	4.88396e-24	-0.452729	0.079	0.239	6.76282e-19	RNF167	0
chr22-50522683-50534831	5.76487e-12	-0.452787	0.178	0.331	7.98262e-07	SCO2	0
chr2-234488140-234497846	3.14972e-31	-0.453177	0.052	0.206	4.36142e-26	ARL4C	0
chr19-51365299-51369602	4.78449e-34	-0.453703	0.039	0.201	6.62509e-29	CLDND2	0
chr2-96140953-96149311	8.50783e-20	-0.456099	0.129	0.29	1.17808e-14	DUSP2	0
chr13-50121576-50131737	5.38979e-17	-0.461159	0.135	0.295	7.46324e-12	DLEU1	0
chr2-240564686-240570013	1.61697e-31	-0.462617	0.062	0.222	2.23902e-26	RNPEPL1	0
chr9-129883906-129891273	3.74198e-16	-0.463261	0.176	0.333	5.18153e-11	FNBP1	0
chr1-15523685-15527917	1.83846e-19	-0.463319	0.123	0.299	2.54572e-14	CASP9	0
chr19-45467061-45479515	2.8465e-12	-0.46474	0.212	0.375	3.94155e-07	FOSB	0
chr2-96527103-96540585	2.1999e-18	-0.46519	0.148	0.316	3.0462e-13	ARID5A	0
chr19-13829157-13844947	1.49683e-10	-0.478005	0.229	0.391	2.07267e-05	ZSWIM4	0
chr17-38698716-38707344	1.16528e-22	-0.479368	0.109	0.279	1.61356e-17	MLLT6	0
chr19-13149388-13157516	7.48135e-15	-0.4798	0.176	0.349	1.03594e-09	STX10	0
chr19-41261681-41267128	7.13e-25	-0.484491	0.128	0.308	9.8729e-20	HNRNPUL1	0
chr8-133065995-133076822	8.2231e-38	-0.487041	0.043	0.213	1.13865e-32	SLA	0
chr10-102641717-102649636	4.44174e-23	-0.489128	0.121	0.295	6.15047e-18	TRIM8	0
chr1-2544552-2549691	3.92727e-39	-0.489267	0.04	0.208	5.43809e-34	RP3-395M20.12	0
chr17-21283417-21288939	5.09943e-22	-0.490235	0.129	0.308	7.06118e-17	MAP2K3	0
chr19-10415698-10426967	9.154e-25	-0.490979	0.085	0.252	1.26755e-19	PDE4A	0
chr15-75449666-75456690	1.72588e-13	-0.491692	0.3	0.476	2.38982e-08	SIN3A	0
chr19-54187988-54192289	1.79547e-21	-0.498586	0.197	0.388	2.48618e-16	TSEN34	0
chr16-27400520-27409165	5.26294e-42	-0.500223	0.036	0.201	7.2876e-37	IL21R	0
chr10-79241487-79250825	1.0688e-27	-0.501583	0.053	0.21	1.47996e-22	ZMIZ1	0
chr17-8150379-8157478	6.62397e-28	-0.504149	0.117	0.304	9.17222e-23	PER1	0
chr1-44799462-44814302	8.57337e-13	-0.513623	0.259	0.428	1.18715e-07	BTBD19	0
chr11-3836789-3842416	2.92671e-37	-0.51735	0.049	0.224	4.05261e-32	RHOG	0
chr1-66330216-66337618	7.46277e-46	-0.523678	0.028	0.207	1.03337e-40	PDE4B	0
chr7-131102432-131111678	7.50702e-34	-0.526508	0.083	0.271	1.0395e-28	MKLN1	0
chr21-35044722-35052001	1.7409e-34	-0.527482	0.071	0.256	2.41062e-29	RUNX1	0
chr7-130929928-130945902	1.50202e-34	-0.530258	0.074	0.249	2.07985e-29	RP11-138A9.2	0
chr19-18288984-18295226	9.90934e-45	-0.531016	0.029	0.207	1.37215e-39	JUND	7361
chr17-28948293-28954274	9.3457e-35	-0.53106	0.077	0.269	1.2941e-29	PHF12	0
chr19-48871841-48885607	1.06066e-19	-0.534937	0.165	0.353	1.4687e-14	PPP1R15A	0
chr5-100899872-100905687	2.0667e-45	-0.548961	0.054	0.246	2.86176e-40	ST8SIA4	0
chr1-12165252-12175560	1.9746e-47	-0.54956	0.034	0.22	2.73422e-42	TNFRSF1B	0
chr2-201114854-201128091	2.44535e-25	-0.579278	0.165	0.371	3.38608e-20	CFLAR	0
chr10-11162741-11171970	8.58796e-71	-0.593802	0.012	0.211	1.18918e-65	CELF2	0
chr15-64891427-64897994	1.1547e-59	-0.60622	0.029	0.237	1.59892e-54	AC069368.3	0
chr15-85578895-85586663	3.32715e-58	-0.606365	0.02	0.217	4.6071e-53	AKAP13	0
chr17-45221264-45232108	3.78124e-54	-0.607128	0.059	0.277	5.23589e-49	FMNL1	0
chr2-231705316-231718180	4.54969e-30	-0.61196	0.173	0.392	6.29996e-25	PTMA	0
chr5-172763619-172774146	1.29676e-26	-0.614743	0.222	0.446	1.79562e-21	DUSP1	0
chr10-17226900-17235825	2.33161e-52	-0.629346	0.065	0.287	3.22857e-47	VIM	0
chr6-137866051-137885785	4.63045e-24	-0.65001	0.218	0.424	6.41178e-19	TNFAIP3	0
chr19-39401015-39415204	1.72911e-23	-0.658409	0.319	0.538	2.3943e-18	ZFP36	0
chr10-3773592-3787283	5.07546e-37	-0.672846	0.171	0.412	7.028e-32	KLF6	0
chr17-7833426-7845483	4.61531e-31	-0.698633	0.225	0.458	6.39083e-26	DNAH2	0
chr17-40316271-40328104	4.1559e-52	-0.723212	0.084	0.329	5.75468e-47	RARA	0
chr17-58327653-58340507	2.66298e-66	-0.730156	0.068	0.314	3.68743e-61	TSPOAP1	0

## Sheet: Basal2
	p_val	avg_log2FC	pct.1	pct.2	p_val_adj	gene	distance
chr1-209606824-209636948	8.96192e-110	1.0946	0.617	0.222	1.24096e-104	LAMB3	0
chr1-153607928-153617769	8.65817e-48	0.621099	0.384	0.123	1.1989e-42	S100A14	0
chr17-50054902-50065400	1.12359e-37	0.605884	0.36	0.14	1.55583e-32	ITGA3	0
chr17-81080227-81098476	1.17303e-29	0.604422	0.462	0.246	1.62429e-24	BAIAP2	0
chr19-46192766-46199605	3.71431e-60	0.562061	0.23	0.036	5.14321e-55	AC006262.5	0
chr1-16619880-16626800	1.86568e-31	0.556439	0.351	0.14	2.58341e-26	RP5-1182A14.5	2150
chr14-51532746-51535199	6.8134e-53	0.548265	0.254	0.049	9.43452e-48	FRMD6-AS2	0
chr12-52511525-52526326	1.50447e-24	0.525777	0.353	0.149	2.08325e-19	KRT5	0
chr1-58571954-58579395	1.65829e-32	0.518784	0.335	0.131	2.29623e-27	TACSTD2	0
chr14-50006955-50009520	1.40923e-41	0.514438	0.257	0.064	1.95136e-36	LINC01588	0
chr20-45336372-45349001	1.26909e-25	0.500119	0.378	0.184	1.75731e-20	SDC4	0
chr2-46845614-46851336	1.20068e-39	0.492588	0.268	0.075	1.66258e-34	LINC01119	0
chr1-201304856-201312933	1.03951e-26	0.49035	0.309	0.123	1.4394e-21	PKP1	0
chr14-51487932-51492548	3.74471e-44	0.481945	0.244	0.051	5.1853e-39	FRMD6	0
chr7-26177257-26189500	1.00217e-23	0.481586	0.328	0.15	1.3877e-18	NFE2L3	0
chr17-72586763-72593142	8.66006e-39	0.480852	0.261	0.071	1.19916e-33	LINC00511	0
chr3-13849675-13854637	1.79929e-35	0.469095	0.242	0.064	2.49148e-30	WNT7A	0
chr8-93873442-93876324	1.33705e-28	0.467832	0.28	0.094	1.85141e-23	PDP1	0
chr5-149438507-149443111	7.26415e-31	0.464911	0.264	0.085	1.00587e-25	CARMN	5671
chr1-10897436-10902165	1.47317e-29	0.462012	0.248	0.076	2.03989e-24	C1orf127	44305
chr14-50954757-50957739	2.59809e-31	0.457561	0.245	0.076	3.59758e-26	RP11-218E20.3	0
chr11-65433938-65450914	1.17575e-15	0.454567	0.365	0.219	1.62805e-10	NEAT1	0
chr8-102755792-102759504	1.42144e-25	0.45456	0.273	0.096	1.96827e-20	KB-1732A1.1	46012
chr11-122802816-122805434	1.13305e-32	0.452045	0.24	0.07	1.56894e-27	UBASH3B	0
chr13-31092688-31095339	5.18957e-34	0.438663	0.218	0.056	7.186e-29	HSPH1	39634
chr14-51394650-51397343	7.12214e-35	0.437171	0.209	0.049	9.86203e-30	RP11-255G12.3	0
chr6-54846102-54850090	2.67602e-31	0.434111	0.236	0.065	3.70549e-26	FAM83B	0
chr14-50037808-50041088	7.8177e-19	0.431646	0.368	0.197	1.08252e-13	LINC01588	0
chr22-27473268-27475978	2.50446e-29	0.42903	0.21	0.059	3.46792e-24	RP11-46E17.6	13207
chr1-155123866-155130825	2.82924e-22	0.424368	0.276	0.121	3.91765e-17	EFNA1	0
chr11-120121014-120125581	4.3777e-24	0.417382	0.25	0.091	6.06181e-19	TRIM29	0
chr1-235067221-235070844	7.88173e-23	0.416955	0.245	0.095	1.09138e-17	LINC01348	0
chr3-194321632-194324827	9.79552e-25	0.413494	0.218	0.074	1.35639e-19	LINC00887	8828
chr4-168587077-168590052	7.13823e-26	0.410028	0.22	0.071	9.88431e-21	PALLD	0
chr1-209648256-209656433	1.28207e-19	0.409427	0.292	0.131	1.77528e-14	LAMB3	0
chr9-133873244-133877598	1.0713e-25	0.408098	0.229	0.077	1.48342e-20	VAV2	0
chr8-133247179-133280717	2.19913e-12	0.407066	0.386	0.237	3.04514e-07	NDRG1	0
chr5-32504374-32509501	5.53066e-28	0.405898	0.233	0.069	7.6583e-23	SUB1	22131
chr1-201282986-201290227	4.7466e-27	0.403601	0.23	0.073	6.57262e-22	PKP1	0
chr17-77474929-77478652	8.29012e-32	0.402815	0.214	0.056	1.14793e-26	SEPT9	0
chr14-104965858-104971069	4.50779e-22	0.402732	0.242	0.091	6.24194e-17	AHNAK2	0
chr5-149631817-149634431	2.10915e-31	0.397543	0.201	0.052	2.92054e-26	ARHGEF37	0
chr3-159761432-159767006	4.19924e-16	0.396082	0.292	0.149	5.81469e-11	IQCJ-SCHIP1	0
chr7-18508198-18510048	1.01541e-22	0.396041	0.233	0.087	1.40603e-17	HDAC9	0
chr2-172094408-172099511	6.93022e-23	0.395877	0.257	0.102	9.59627e-18	DLX2	0
chr17-48045207-48056248	6.26081e-12	0.394942	0.406	0.264	8.66935e-07	NFE2L1	0
chr6-52503236-52505138	1.80655e-26	0.394013	0.236	0.077	2.50153e-21	TRAM2	0
chr17-41578572-41583788	3.55465e-30	0.393839	0.207	0.063	4.92213e-25	KRT14	0
chr11-129639029-129644011	6.88435e-25	0.392199	0.209	0.067	9.53276e-20	LINC01395	21759
chr11-67053586-67058030	2.03616e-25	0.387856	0.232	0.079	2.81947e-20	RHOD	0
chr17-77284839-77289448	7.10995e-19	0.384062	0.246	0.104	9.84514e-14	SEPT9	0
chr18-23870706-23873629	3.35936e-24	0.382784	0.218	0.071	4.65171e-19	LAMA3	0
chr7-27110541-27116749	2.80248e-23	0.380949	0.212	0.068	3.8806e-18	HOXA3	0
chr5-148912140-148915858	7.87763e-26	0.379654	0.206	0.06	1.09082e-20	SH3TC2	7780
chr6-10411464-10420771	5.33664e-14	0.378655	0.256	0.122	7.38965e-09	TFAP2A	0
chr4-30716121-30724762	5.29493e-18	0.378352	0.23	0.095	7.33189e-13	PCDH7	0
chr13-110345855-110348631	6.655e-20	0.378173	0.229	0.084	9.21518e-15	COL4A2	0
chr7-538052-540641	4.2057e-24	0.374532	0.201	0.065	5.82364e-19	PRKAR1B	8555
chr6-11769220-11773392	6.55173e-19	0.371089	0.262	0.122	9.07217e-14	ADTRP	0
chr2-20576107-20580262	3.03762e-20	0.365279	0.254	0.109	4.20619e-15	HS1BP3	0
chr5-107668639-107674086	2.50088e-17	0.364227	0.221	0.088	3.46296e-12	EFNA5	0
chr14-50342182-50344890	1.92522e-22	0.362931	0.207	0.071	2.66585e-17	CDKL1	0
chr2-20230680-20233403	8.80239e-23	0.360727	0.205	0.066	1.21887e-17	SDC1	5246
chr17-50949550-50954922	3.64629e-20	0.357986	0.217	0.085	5.04902e-15	RP11-700H6.2	799
chr9-121716553-121722224	4.20214e-21	0.357708	0.205	0.068	5.8187e-16	DAB2IP	0
chr1-202007313-202012447	3.50363e-20	0.356598	0.207	0.075	4.85148e-15	ELF3	0
chr6-3207718-3210306	4.78724e-16	0.356043	0.209	0.084	6.6289e-11	RP1-40E16.9	11961
chr17-75720497-75724324	4.98771e-22	0.355653	0.206	0.071	6.90648e-17	ITGB4	0
chr3-193828308-193832917	1.8203e-19	0.355393	0.222	0.084	2.52057e-14	RP11-528A4.2	9642
chr15-67105026-67111338	1.06472e-17	0.35516	0.254	0.11	1.47431e-12	SMAD3	0
chr1-161082439-161089857	9.80385e-17	0.351883	0.241	0.103	1.35754e-11	NECTIN4	0
chr22-20530140-20534270	2.49798e-21	0.351439	0.201	0.069	3.45895e-16	MED15	0
chr1-234996913-234999008	1.75168e-19	0.350194	0.212	0.077	2.42555e-14	RP11-443B7.3	16108
chr16-30739577-30742474	7.29154e-21	0.349357	0.202	0.067	1.00966e-15	TMEM265	0
chr1-209777156-209787921	9.8598e-16	0.347319	0.264	0.126	1.36529e-10	TRAF3IP3	0
chr8-48919517-48924247	1.20507e-15	0.346211	0.217	0.088	1.66866e-10	SNAI2	0
chr2-113238800-113242094	8.47718e-20	0.344262	0.25	0.113	1.17384e-14	PAX8	0
chr1-161196796-161203163	1.89779e-11	0.339245	0.303	0.18	2.62787e-06	NDUFS2	0
chr1-26997530-27003682	9.13249e-16	0.338249	0.25	0.117	1.26458e-10	TRNP1	0
chr11-120130775-120138761	2.40154e-13	0.336631	0.216	0.09	3.32541e-08	TRIM29	0
chr8-127667951-127671494	9.12707e-16	0.336372	0.201	0.077	1.26383e-10	CASC11	14848
chr8-141151879-141154715	4.72231e-17	0.333854	0.216	0.087	6.53898e-12	DENND3	0
chr7-26346250-26348460	5.54708e-17	0.328765	0.22	0.09	7.68104e-12	SNX10	0
chr8-94638674-94643341	7.4307e-13	0.328739	0.217	0.096	1.02893e-07	ESRP1	0
chr17-77318478-77326265	8.76749e-13	0.32782	0.3	0.17	1.21403e-07	SEPT9	0
chr1-93691226-93696119	8.21075e-16	0.327367	0.229	0.1	1.13694e-10	BCAR3	0
chr11-118618183-118623990	1.74819e-15	0.323951	0.217	0.094	2.42071e-10	PHLDB1	0
chr8-100867837-100870369	1.4034e-18	0.323867	0.217	0.083	1.94328e-13	YWHAZ	46155
chr1-27007688-27013563	1.08823e-13	0.322503	0.218	0.103	1.50688e-08	FAM46B	0
chr1-209804448-209811098	9.48437e-15	0.322467	0.24	0.117	1.3133e-09	IRF6	0
chr8-127851047-127855136	1.99089e-14	0.321003	0.244	0.11	2.75679e-09	PVT1	0
chr7-20328961-20332902	5.3155e-11	0.320522	0.273	0.15	7.36037e-06	ITGB8	0
chr7-5418380-5430635	1.04073e-09	0.319608	0.367	0.229	0.000144109	TNRC18	0
chr4-145732707-145735957	1.39836e-14	0.319337	0.23	0.107	1.9363e-09	C4orf51	0
chr13-31127216-31138645	2.05122e-14	0.318621	0.217	0.099	2.84033e-09	HSPH1	0
chr9-115113920-115119480	1.54391e-14	0.31835	0.214	0.091	2.13785e-09	TNC	0
chr5-172417983-172421717	1.14945e-16	0.316078	0.21	0.082	1.59164e-11	SH3PXD2B	0
chr9-121285673-121290287	2.11656e-12	0.315808	0.265	0.137	2.9308e-07	GSN	0
chr8-141237175-141240987	1.08863e-12	0.315601	0.224	0.109	1.50742e-07	SLC45A4	0
chr1-24318160-24323714	5.12743e-16	0.31358	0.205	0.083	7.09996e-11	GRHL3	0
chr8-118107074-118113791	8.81702e-10	0.310368	0.301	0.189	0.000122089	EXT1	0
chr3-38028082-38032463	6.94901e-16	0.309576	0.201	0.082	9.6223e-11	PLCD1	0
chr14-35331537-35338223	2.09832e-08	0.306695	0.27	0.16	0.00290555	PSMA6	14043
chr4-3384242-3389822	3.54023e-11	0.303085	0.225	0.116	4.90215e-06	RGS12	0
chr15-70491057-70496146	1.37726e-12	0.299681	0.225	0.109	1.90709e-07	RP11-96C21.1	7760
chr20-35302639-35308856	1.75208e-13	0.299211	0.226	0.109	2.4261e-08	UQCC1	0
chr1-16152485-16159674	1.93863e-11	0.298385	0.22	0.104	2.68442e-06	EPHA2	0
chr18-3622171-3625642	1.87545e-10	0.298196	0.217	0.115	2.59693e-05	DLGAP1	0
chr8-95112546-95116600	4.59362e-15	0.297139	0.21	0.09	6.36078e-10	NDUFAF6	0
chr11-118908941-118915852	1.72244e-08	0.295656	0.277	0.16	0.00238506	BCL9L	0
chr5-132468821-132493402	0.000110938	0.294321	0.51	0.423	1	IRF1	0
chr8-124626462-124630769	1.98091e-11	0.289828	0.229	0.12	2.74297e-06	MTSS1	0
chr5-177299806-177305276	3.00541e-07	0.288339	0.274	0.169	0.041616	PRELID1	0
chr3-194132289-194142788	1.14823e-07	0.288225	0.331	0.217	0.0158995	HES1	0
chr18-79959659-79965896	1.36211e-08	0.287621	0.233	0.133	0.00188611	HSBP1L1	0
chr17-50423650-50430247	6.5527e-12	0.285084	0.217	0.11	9.07353e-07	ACSF2	0
chr20-50438788-50441903	5.32601e-12	0.285059	0.226	0.117	7.37493e-07	PTPN1	68417
chr14-85527826-85537112	1.50454e-10	0.281706	0.237	0.118	2.08334e-05	FLRT2	0
chr2-218892155-218898813	1.02476e-09	0.27919	0.269	0.155	0.000141898	WNT10A	0
chr5-145936114-145942771	3.44499e-11	0.276343	0.213	0.105	4.77028e-06	SH3RF2	0
chr14-67409293-67414921	2.16587e-08	0.276209	0.228	0.127	0.00299908	PLEK2	0
chr5-140344522-140349935	1.3247e-10	0.275628	0.209	0.104	1.83431e-05	HBEGF	0
chr1-156703437-156713652	8.69867e-09	0.27559	0.203	0.107	0.00120451	CRABP2	0
chr1-153562384-153569153	7.42405e-08	0.274883	0.277	0.169	0.0102801	S100A2	0
chr14-102069030-102084339	2.01696e-08	0.272548	0.258	0.159	0.00279289	HSP90AA1	0
chr3-49899836-49904598	6.14884e-09	0.271405	0.213	0.111	0.00085143	MST1R	0
chr7-1566751-1572625	5.14648e-07	0.270955	0.256	0.154	0.0712632	PSMG3	0
chr7-70594952-70600394	3.56827e-12	0.269685	0.202	0.091	4.94098e-07	AUTS2	0
chr16-21300237-21303436	5.89682e-11	0.265263	0.217	0.11	8.16532e-06	CRYM	0
chr17-45314090-45321528	1.94587e-05	0.264632	0.341	0.232	1	MAP3K14	0
chr20-57617759-57623159	3.43073e-08	0.262474	0.245	0.144	0.00475054	ZBP1	0
chr7-30167966-30173965	3.76281e-09	0.260958	0.224	0.121	0.000521036	AC007036.6	2421
chr11-59171343-59175711	8.69468e-07	0.259383	0.233	0.141	0.120395	DTX4	0
chr8-100414190-100418456	4.55991e-10	0.259115	0.213	0.109	6.31411e-05	KB-173C10.2	0
chr7-76301804-76308290	3.52538e-07	0.258076	0.261	0.163	0.048816	HSPB1	0
chr1-234655248-234659980	6.40259e-08	0.25482	0.224	0.121	0.00886566	RP4-781K5.4	0
chr11-57321143-57326267	7.05997e-06	0.254662	0.273	0.176	0.977594	TNKS1BP1	0
chr13-73057521-73063681	2.47713e-07	0.252982	0.22	0.128	0.0343008	KLF5	0
chr4-99815106-99818874	1.36963e-07	0.251311	0.234	0.138	0.0189653	DAPP1	0
chr16-11250037-11259633	6.76293e-15	-0.250464	0.163	0.259	9.36462e-10	SOCS1	0
chr17-4966114-4970212	1.12388e-14	-0.252084	0.131	0.225	1.55624e-09	SPAG7	0
chr12-108628159-108636308	6.21596e-12	-0.25355	0.138	0.22	8.60724e-07	SELPLG	0
chr2-30145825-30148668	3.24486e-13	-0.25375	0.149	0.234	4.49316e-08	YPEL5	0
chr19-40776761-40779358	3.25387e-13	-0.255655	0.147	0.23	4.50564e-08	RAB4B	0
chr6-134167583-134178928	1.17641e-12	-0.256329	0.138	0.209	1.62897e-07	SGK1	0
chr12-103928306-103931938	3.40058e-14	-0.259347	0.146	0.243	4.70878e-09	HSP90B1	0
chr6-108557493-108563089	1.71418e-18	-0.260831	0.119	0.227	2.37363e-13	FOXO3	0
chr8-42151815-42156540	2.92556e-14	-0.264995	0.135	0.233	4.05103e-09	AP3M2	0
chr19-38848262-38853207	1.44926e-17	-0.265833	0.195	0.302	2.00679e-12	HNRNPL	0
chr2-201114854-201128091	3.07298e-11	-0.265922	0.261	0.332	4.25515e-06	CFLAR	0
chr2-8676467-8683837	1.32782e-13	-0.26645	0.151	0.244	1.83863e-08	ID2	0
chr19-10415698-10426967	9.89137e-15	-0.269602	0.139	0.225	1.36966e-09	PDE4A	0
chr11-9459440-9462655	1.35011e-15	-0.270213	0.11	0.204	1.8695e-10	ZNF143	0
chr10-102393582-102396578	1.00298e-14	-0.272837	0.118	0.207	1.38882e-09	NFKB2	0
chr17-35241486-35245758	1.31943e-18	-0.27455	0.095	0.2	1.82702e-13	SLFN5	0
chr16-88451702-88457554	3.93987e-15	-0.27486	0.114	0.21	5.45554e-10	ZFPM1	0
chr5-177425431-177432511	9.91766e-16	-0.281762	0.163	0.261	1.3733e-10	GRK6	0
chr19-54462144-54465463	1.33346e-18	-0.282044	0.12	0.222	1.84644e-13	LENG9	0
chr6-157760307-157765349	1.89921e-17	-0.285142	0.116	0.217	2.62984e-12	SNX9	0
chr14-105485541-105492484	4.95304e-15	-0.28772	0.224	0.33	6.85847e-10	AL928654.7	0
chr6-73518619-73522340	3.93583e-18	-0.289888	0.103	0.203	5.44995e-13	EEF1A1	0
chr10-43403082-43411961	1.44824e-18	-0.295953	0.123	0.228	2.00537e-13	HNRNPF	0
chr17-28948293-28954274	1.18155e-16	-0.302691	0.138	0.237	1.63609e-11	PHF12	0
chr17-14297147-14304265	2.15906e-20	-0.30304	0.134	0.25	2.98965e-15	HS3ST3B1	0
chr8-25457091-25460961	6.64066e-19	-0.305596	0.116	0.223	9.19532e-14	KCTD9	0
chr17-7571932-7575702	3.45513e-19	-0.306455	0.088	0.201	4.78431e-14	SENP3-EIF4A1	0
chr7-130929928-130945902	2.1181e-14	-0.307994	0.127	0.221	2.93294e-09	RP11-138A9.2	0
chr10-102501219-102505371	3.25861e-18	-0.308322	0.138	0.246	4.5122e-13	ACTR1A	0
chr17-7011908-7016118	6.13032e-21	-0.311981	0.099	0.211	8.48866e-16	RNASEK	0
chr6-151389264-151393312	2.85035e-21	-0.316137	0.09	0.207	3.94688e-16	ZBTB2	0
chr7-155296548-155300067	2.56988e-18	-0.316701	0.126	0.232	3.55851e-13	INSIG1	0
chr19-18276994-18283171	1.90744e-16	-0.317452	0.15	0.247	2.64123e-11	JUND	0
chr17-38698716-38707344	1.97052e-16	-0.320023	0.15	0.254	2.72858e-11	MLLT6	0
chr19-39401015-39415204	5.03568e-18	-0.328031	0.399	0.5	6.9729e-13	ZFP36	0
chr11-692621-698679	4.62856e-23	-0.328581	0.111	0.228	6.40916e-18	TMEM80	0
chr9-114381884-114391388	4.69301e-20	-0.332318	0.119	0.235	6.49841e-15	AKNA	0
chr21-35044722-35052001	7.38927e-21	-0.336327	0.115	0.228	1.02319e-15	RUNX1	0
chr6-89078926-89083582	8.07396e-25	-0.339092	0.08	0.205	1.118e-19	PNRC1	0
chr10-99618775-99622131	5.42869e-25	-0.343775	0.104	0.236	7.51711e-20	SLC25A28	0
chr17-8150379-8157478	9.92446e-22	-0.345871	0.15	0.278	1.37424e-16	PER1	0
chr19-4470856-4472609	1.16007e-28	-0.35196	0.076	0.209	1.60635e-23	CTB-50L17.10	0
chr12-12714084-12727188	6.39246e-20	-0.352967	0.241	0.362	8.85165e-15	APOLD1	0
chr19-2474448-2480130	6.36579e-25	-0.356269	0.091	0.206	8.8147e-20	GADD45B	0
chr10-62045337-62051610	7.16441e-25	-0.356544	0.082	0.205	9.92056e-20	ARID5B	0
chr19-1247843-1254621	1.12415e-25	-0.371532	0.102	0.228	1.55661e-20	MIDN	0
chr19-6423406-6425984	4.34088e-29	-0.380693	0.083	0.224	6.01082e-24	KHSRP	0
chr10-74824001-74827662	4.37761e-26	-0.392878	0.095	0.231	6.06167e-21	KAT6B	0
chr6-136287843-136291179	6.75967e-28	-0.404468	0.104	0.245	9.36011e-23	BCLAF1	0
chr10-102641717-102649636	3.10968e-27	-0.411898	0.131	0.274	4.30597e-22	TRIM8	0
chr5-100899872-100905687	4.40309e-29	-0.420194	0.08	0.22	6.09696e-24	ST8SIA4	0
chr10-3773592-3787283	5.34859e-24	-0.429796	0.242	0.373	7.40619e-19	KLF6	0
chr9-129883906-129891273	1.19786e-30	-0.444826	0.169	0.317	1.65867e-25	FNBP1	0
chr17-7833426-7845483	6.1085e-26	-0.448166	0.281	0.422	8.45843e-21	DNAH2	0
chr19-5902881-5905473	4.35379e-37	-0.459925	0.098	0.269	6.02869e-32	NDUFA11	0
chr15-64891427-64897994	1.29928e-37	-0.467283	0.055	0.21	1.79911e-32	AC069368.3	0
chr7-131102432-131111678	4.95585e-36	-0.490682	0.086	0.249	6.86237e-31	MKLN1	0
chr10-17226900-17235825	6.72728e-37	-0.496965	0.09	0.258	9.31527e-32	VIM	0
chr6-137866051-137885785	8.12772e-33	-0.515662	0.237	0.398	1.12545e-27	TNFAIP3	0
chr12-4268353-4275914	3.93044e-43	-0.519502	0.055	0.232	5.44248e-38	CCND2	0
chr17-40316271-40328104	8.76698e-41	-0.524126	0.124	0.296	1.21396e-35	RARA	0
chr17-58327653-58340507	8.31329e-47	-0.590315	0.084	0.284	1.15114e-41	TSPOAP1	0

## Sheet: Spinous2
	p_val	avg_log2FC	pct.1	pct.2	p_val_adj	gene	distance
chr12-52511525-52526326	5.36015e-10	0.716814	0.426	0.172	7.4222e-05	KRT5	0
chr1-58571954-58579395	9.6997e-12	0.684817	0.434	0.154	1.34312e-06	TACSTD2	0
chr1-201304856-201312933	1.03311e-09	0.647057	0.382	0.144	0.000143054	PKP1	0
chr6-10411464-10420771	7.13743e-10	0.638277	0.382	0.135	9.8832e-05	TFAP2A	0
chr10-73885967-73889848	3.41732e-11	0.620088	0.353	0.108	4.73197e-06	CAMK2G	11375
chr1-153607928-153617769	1.69445e-08	0.575738	0.412	0.154	0.00234631	S100A14	0
chr11-120130775-120138761	2.41773e-05	0.546825	0.265	0.104	1	TRIM29	0
chr2-215105482-215108129	2.67633e-17	0.538332	0.228	0.028	3.70592e-12	ABCA12	0
chr17-39737598-39741791	1.42467e-09	0.530609	0.294	0.089	0.000197275	GRB7	0
chr6-138086497-138089912	2.89741e-11	0.525757	0.206	0.039	4.01204e-06	PERP	0
chr4-186723013-186729519	3.60718e-10	0.523862	0.301	0.087	4.99487e-05	FAT1	0
chr3-190318357-190323764	4.66442e-10	0.520492	0.301	0.088	6.45882e-05	CLDN1	0
chr6-138030847-138033156	1.28381e-14	0.510485	0.243	0.04	1.77769e-09	PERP	55348
chr11-120121014-120125581	1.56107e-07	0.506166	0.301	0.109	0.0216162	TRIM29	0
chr10-86966114-86973349	2.5634e-05	0.499859	0.36	0.173	1	ADIRF	0
chr2-73980739-73988513	1.22256e-06	0.492799	0.419	0.183	0.169288	TET3	0
chr6-30882278-30886998	1.65245e-08	0.481903	0.309	0.099	0.00228815	DDR1	0
chr2-215136521-215138943	7.84274e-10	0.479286	0.206	0.041	0.000108598	ABCA12	0
chr1-161017779-161022963	7.7788e-05	0.477178	0.324	0.159	1	F11R	0
chr7-55052079-55056145	7.45316e-07	0.475694	0.213	0.068	0.103204	EGFR	0
chr15-60369972-60377167	0.000115684	0.472134	0.235	0.098	1	ANXA2	0
chr20-19047013-19048349	1.57595e-13	0.463243	0.213	0.029	2.18222e-08	RP11-97N19.3	0
chr7-130292517-130295318	3.19669e-11	0.462294	0.213	0.04	4.42646e-06	CPA4	0
chr10-75399185-75404789	4.85356e-06	0.457941	0.25	0.098	0.672072	ZNF503	0
chr11-67053586-67058030	5.04124e-06	0.448819	0.272	0.096	0.69806	RHOD	0
chr15-91865991-91868292	3.4045e-08	0.447733	0.235	0.067	0.00471421	SLCO3A1	0
chr1-10897436-10902165	4.54856e-07	0.447165	0.272	0.097	0.0629839	C1orf127	44305
chr17-37487865-37491661	4.31637e-06	0.442466	0.257	0.104	0.597688	DUSP14	0
chr5-145936114-145942771	3.73492e-05	0.440781	0.272	0.117	1	SH3RF2	0
chr1-201282986-201290227	7.82757e-07	0.438377	0.272	0.091	0.108388	PKP1	0
chr17-77284839-77289448	5.86301e-05	0.438168	0.272	0.121	1	SEPT9	0
chr17-789143-791198	7.88169e-13	0.437801	0.206	0.031	1.09138e-07	MRM3	0
chr6-138817627-138819241	6.006e-14	0.431235	0.221	0.031	8.31651e-09	ECT2L	0
chr2-203533321-203536305	1.27788e-07	0.430286	0.272	0.094	0.0176948	RAPH1	0
chr5-6631421-6638739	3.45473e-05	0.42678	0.375	0.187	1	SRD5A1	0
chr1-32715761-32717245	8.96098e-10	0.426661	0.206	0.04	0.000124083	SYNC	12164
chr1-24318160-24323714	7.67986e-06	0.425201	0.25	0.097	1	GRHL3	0
chr7-151113175-151117944	3.36583e-06	0.424961	0.221	0.074	0.466067	AGAP3	0
chr18-54827980-54830693	9.66247e-09	0.423689	0.235	0.06	0.00133796	RAB27B	0
chr8-102755792-102759504	2.26711e-05	0.420428	0.272	0.118	1	KB-1732A1.1	46012
chr6-113854614-113860119	0.000172563	0.419197	0.279	0.123	1	MARCKS	0
chr19-46371554-46374483	1.66546e-07	0.417582	0.221	0.059	0.0230616	PPP5C	0
chr7-5418380-5430635	0.00106594	0.416824	0.419	0.244	1	TNRC18	0
chr5-148912140-148915858	2.04347e-07	0.415308	0.257	0.076	0.0282959	SH3TC2	7780
chr1-209804448-209811098	6.05106e-06	0.414208	0.301	0.13	0.83789	IRF6	0
chr6-52503236-52505138	4.97191e-06	0.412382	0.257	0.096	0.68846	TRAM2	0
chr5-67009862-67012783	1.921e-07	0.410059	0.25	0.079	0.0266001	MAST4	0
chr4-140149933-140154922	9.57762e-05	0.409213	0.301	0.136	1	MAML3	0
chr5-3309518-3311723	1.16835e-08	0.405198	0.213	0.049	0.00161782	LINC01019	105428
chr11-44572791-44575754	3.76678e-07	0.402038	0.221	0.069	0.0521586	CD82	0
chr1-201394692-201402359	3.82105e-07	0.399308	0.265	0.086	0.0529101	LAD1	0
chr5-116572415-116576655	1.53292e-07	0.3993	0.221	0.066	0.0212264	SEMA6A	0
chr14-85527826-85537112	2.3121e-05	0.397025	0.316	0.131	1	FLRT2	0
chr3-42514601-42516809	5.75447e-09	0.396824	0.235	0.057	0.000796821	VIPR1	0
chr10-79066367-79072596	0.000192671	0.396625	0.279	0.131	1	ZMIZ1	0
chr12-53695280-53697450	1.43602e-07	0.39273	0.206	0.057	0.0198845	CALCOCO1	11066
chr12-52145473-52150414	5.11572e-05	0.392106	0.228	0.094	1	KRT80	18581
chr19-38263592-38268989	6.97294e-05	0.391634	0.243	0.098	1	SPINT2	0
chr10-3467011-3469783	2.25232e-05	0.390329	0.228	0.079	1	RP11-482E14.1	17110
chr3-47442897-47444641	9.16377e-11	0.38974	0.206	0.038	1.26891e-05	SCAP	0
chr2-160219970-160226423	1.11683e-05	0.388181	0.235	0.083	1	ITGB6	0
chr17-15944579-15948138	1.61048e-07	0.387681	0.228	0.066	0.0223003	ADORA2B	0
chr1-234655248-234659980	7.15541e-05	0.385821	0.301	0.132	1	RP4-781K5.4	0
chr2-29063020-29067785	4.3811e-08	0.385796	0.213	0.058	0.00606651	C2orf71	0
chr16-30739577-30742474	2.80729e-05	0.384954	0.235	0.082	1	TMEM265	0
chr6-75204134-75209378	0.000138985	0.382761	0.221	0.087	1	COL12A1	0
chr5-154828951-154831147	1.3307e-08	0.381385	0.221	0.057	0.00184262	FAXDC2	0
chr1-6414046-6417154	1.66057e-05	0.381308	0.213	0.073	1	HES2	0
chr17-41771924-41774347	6.65851e-09	0.380936	0.213	0.051	0.000922004	JUP	0
chr6-42099159-42101828	5.00953e-08	0.380873	0.235	0.066	0.0069367	C6orf132	0
chr18-3622171-3625642	9.85007e-05	0.380264	0.279	0.126	1	DLGAP1	0
chr14-64702992-64709165	0.000993949	0.379795	0.287	0.139	1	PLEKHG3	0
chr6-138689748-138694010	2.18015e-07	0.378935	0.221	0.072	0.0301885	NHSL1	0
chr20-45336372-45349001	0.00734288	0.378385	0.338	0.208	1	SDC4	0
chr4-5707803-5713261	9.76667e-06	0.376279	0.235	0.08	1	EVC	0
chr2-100817942-100821566	8.97532e-08	0.375903	0.206	0.051	0.0124281	NPAS2	0
chr18-31098860-31104890	2.94337e-05	0.3753	0.221	0.08	1	DSC2	0
chr5-138724330-138726226	1.02056e-06	0.375007	0.221	0.067	0.141317	CTNNA1	0
chr11-94148902-94153033	0.000464147	0.369431	0.206	0.086	1	PANX1	0
chr6-42043958-42051554	0.00985918	0.368426	0.301	0.18	1	TAF8	0
chr20-19757090-19760323	4.92636e-08	0.368225	0.206	0.053	0.00682153	RP1-122P22.2	0
chr2-150484050-150488064	1.56198e-07	0.367608	0.25	0.074	0.0216288	RND3	0
chr2-63047596-63051693	3.75114e-06	0.36074	0.213	0.065	0.519421	OTX1	0
chr3-52045237-52048874	0.000228925	0.360052	0.221	0.087	1	DUSP7	44
chr4-87118843-87122707	2.66527e-07	0.358542	0.206	0.062	0.036906	AFF1	0
chr6-54846102-54850090	5.8209e-06	0.357968	0.235	0.086	0.80602	FAM83B	0
chr7-30167966-30173965	0.000550596	0.357481	0.272	0.132	1	AC007036.6	2421
chr22-20530140-20534270	3.11928e-05	0.355685	0.213	0.084	1	MED15	0
chr16-54926352-54933952	0.000362617	0.355574	0.324	0.166	1	IRX5	0
chr11-33633052-33637197	1.1075e-06	0.355052	0.206	0.059	0.153355	KIAA1549L	0
chr3-50154344-50159465	0.00012932	0.35455	0.228	0.093	1	SEMA3F	0
chr7-142853624-142857390	7.71758e-05	0.353071	0.25	0.099	1	EPHB6	0
chr10-24463463-24468630	5.83716e-06	0.351779	0.221	0.074	0.808271	KIAA1217	0
chr18-49019310-49022399	0.000235915	0.351244	0.206	0.075	1	DYM	19074
chr6-11769220-11773392	0.00129365	0.350228	0.279	0.138	1	ADTRP	0
chr18-32468427-32471768	0.00025911	0.348831	0.221	0.096	1	GAREM1	0
chr1-32758150-32762250	9.11676e-05	0.348019	0.206	0.079	1	KIAA1522	0
chr6-111602035-111607056	0.00106132	0.347934	0.243	0.115	1	TRAF3IP2	0
chr6-73694623-73698000	8.4805e-05	0.347003	0.213	0.086	1	CD109	0
chr1-27007688-27013563	0.00113235	0.34609	0.243	0.116	1	FAM46B	0
chr9-2621024-2624342	3.15578e-05	0.345859	0.206	0.076	1	VLDLR	0
chr8-133247179-133280717	0.266355	0.345696	0.331	0.257	1	NDRG1	0
chr11-65433938-65450914	0.0165903	0.34564	0.39	0.237	1	NEAT1	0
chr1-114668820-114672204	0.000157553	0.345623	0.279	0.123	1	DENND2C	0
chr1-203649013-203650972	6.87405e-05	0.34503	0.257	0.099	1	ATP2B4	0
chr2-235025542-235028826	1.82825e-05	0.344391	0.206	0.065	1	SH3BP4	0
chr6-156718578-156721803	2.95726e-05	0.344096	0.235	0.093	1	RP11-230C9.4	52413
chr1-235067221-235070844	1.74617e-05	0.342907	0.279	0.113	1	LINC01348	0
chr21-38804164-38811850	0.002026	0.340384	0.338	0.193	1	ETS2	0
chr12-52873098-52880378	0.0119852	0.339553	0.243	0.127	1	KRT8	16808
chr2-61014605-61018776	0.000556429	0.338618	0.257	0.126	1	PEX13	0
chr16-57618281-57624001	5.17192e-05	0.338265	0.213	0.084	1	ADGRG1	0
chr12-52492356-52497337	0.000274495	0.337882	0.221	0.091	1	KRT6A	0
chr1-218344764-218348895	2.12339e-06	0.337086	0.213	0.067	0.294026	TGFB2	0
chr6-3207718-3210306	0.0016148	0.336578	0.228	0.099	1	RP1-40E16.9	11961
chr1-156133598-156158080	0.519944	0.336569	0.324	0.271	1	SEMA4A	0
chr1-155123866-155130825	0.000825071	0.336444	0.287	0.14	1	EFNA1	0
chr15-70194298-70198789	0.000114291	0.336011	0.243	0.095	1	AC011648.1	0
chr17-81417034-81420663	0.000509535	0.334381	0.206	0.084	1	BAHCC1	0
chr19-35114438-35121374	0.000924847	0.33317	0.213	0.087	1	FXYD3	0
chr1-26856923-26859779	7.62153e-06	0.332672	0.213	0.074	1	ZDHHC18	0
chr12-106245066-106250095	0.000805513	0.332399	0.257	0.118	1	CKAP4	0
chr1-46182692-46185510	9.49436e-07	0.331581	0.206	0.059	0.131468	TSPAN1	0
chr14-22977078-22983735	0.0579966	0.331072	0.243	0.149	1	RP11-298I3.5	0
chr17-29176240-29181768	0.00142306	0.329944	0.243	0.113	1	MYO18A	0
chr5-96700655-96704424	0.000892912	0.327858	0.309	0.156	1	CAST	0
chr10-119678193-119682938	0.000171759	0.326401	0.206	0.081	1	BAG3	373
chr1-109239358-109241469	6.27705e-05	0.326149	0.206	0.072	1	SARS	1188
chr2-222423331-222428480	0.00042687	0.325862	0.235	0.103	1	SGPP2	0
chr14-68546605-68549404	0.00106299	0.325626	0.221	0.099	1	RAD51B	0
chr19-45467061-45479515	0.202527	0.32557	0.434	0.333	1	FOSB	0
chr3-12756236-12761464	4.81306e-05	0.325089	0.213	0.078	1	TMEM40	0
chr4-86592758-86597239	0.00046844	0.323996	0.206	0.091	1	MAPK10	0
chr1-16152485-16159674	0.00161112	0.321872	0.235	0.117	1	EPHA2	0
chr1-235073211-235076442	0.0218471	0.321435	0.243	0.134	1	LINC01348	0
chr18-75207262-75213102	0.0209877	0.320888	0.279	0.162	1	TSHZ1	0
chr8-141037636-141044220	0.00129956	0.320569	0.213	0.1	1	RP11-128L5.1	11069
chr19-44843766-44850612	0.00556429	0.320189	0.265	0.14	1	NECTIN2	0
chr8-100414190-100418456	0.000423378	0.318698	0.257	0.121	1	KB-173C10.2	0
chr6-3748041-3752706	0.000542006	0.318696	0.265	0.123	1	PXDC1	0
chr10-3773592-3787283	0.30803	0.317838	0.441	0.352	1	KLF6	0
chr4-151407495-151410805	0.000649323	0.317621	0.206	0.085	1	FAM160A1	0
chr4-48015165-48017779	0.000146478	0.316139	0.206	0.08	1	NIPAL1	0
chr1-26997530-27003682	0.0155851	0.316072	0.235	0.134	1	TRNP1	0
chr1-38025316-38031117	0.00112415	0.315809	0.243	0.112	1	UTP11	491
chr11-121464079-121468502	0.000781349	0.315626	0.221	0.096	1	SORL1	0
chr1-161082439-161089857	0.00595679	0.314628	0.243	0.12	1	NECTIN4	0
chr19-7868196-7872558	0.0051156	0.314582	0.257	0.145	1	PRR36	0
chr4-30716121-30724762	0.000232485	0.314364	0.257	0.111	1	PCDH7	0
chr17-41965491-41968526	0.000614843	0.312549	0.221	0.102	1	CNP	0
chr19-42419894-42424319	0.00153772	0.31102	0.243	0.125	1	LIPE	0
chr9-95505690-95512094	0.0045868	0.310273	0.287	0.152	1	PTCH1	0
chr6-158849542-158851122	4.31391e-05	0.308423	0.206	0.071	1	C6orf99	18816
chr6-30100462-30103896	0.00131114	0.30742	0.265	0.126	1	TRIM31	0
chr11-73191888-73195872	0.000128662	0.306175	0.206	0.081	1	RP11-800A3.3	10191
chr22-37559890-37565485	0.00090164	0.305347	0.213	0.095	1	CDC42EP1	0
chr17-72586763-72593142	0.0018075	0.305238	0.213	0.095	1	LINC00511	0
chr8-127667951-127671494	0.00193647	0.304872	0.221	0.091	1	CASC11	14848
chr1-6598588-6604325	0.0713296	0.304788	0.368	0.231	1	KLHL21	0
chr1-1888110-1892992	0.00952959	0.304566	0.213	0.114	1	GNB1	0
chr1-42940683-42947579	0.009405	0.304298	0.206	0.103	1	SLC2A1	0
chr16-85610181-85617372	0.0890231	0.302939	0.279	0.173	1	GSE1	0
chr9-106859888-106865163	0.00155307	0.302458	0.221	0.095	1	ZNF462	0
chr11-61157795-61163020	0.00193137	0.301765	0.235	0.118	1	VPS37C	0
chr1-205315964-205322277	0.0473872	0.301301	0.228	0.131	1	NUAK2	0
chr2-55518839-55521004	0.00536404	0.300636	0.25	0.135	1	CFAP36	0
chr1-159944083-159946808	4.46885e-05	0.299937	0.206	0.075	1	IGSF9	0
chr18-79959659-79965896	0.0064392	0.298955	0.257	0.144	1	HSBP1L1	0
chr20-41339520-41341684	0.000270504	0.298603	0.221	0.087	1	LPIN3	0
chr11-130178019-130182601	0.000294564	0.298096	0.213	0.084	1	ST14	0
chr12-6312172-6313815	9.30115e-05	0.297699	0.206	0.072	1	PLEKHG6	0
chr7-70594952-70600394	0.00167619	0.296782	0.228	0.104	1	AUTS2	0
chr4-3384242-3389822	0.00227527	0.296631	0.265	0.129	1	RGS12	0
chr4-153485977-153490333	0.00121652	0.294672	0.265	0.128	1	KIAA0922	0
chr11-130159324-130164373	0.000113937	0.293734	0.206	0.079	1	ST14	0
chr14-90443355-90445094	3.7158e-05	0.293729	0.206	0.076	1	RP11-1078H9.1	6968
chr12-53053355-53054996	0.000163515	0.293503	0.221	0.094	1	TNS2	0
chr17-41578572-41583788	0.000677436	0.293492	0.206	0.08	1	KRT14	0
chr16-30893247-30897646	0.00352331	0.292652	0.25	0.128	1	BCL7C	0
chr17-2708939-2712705	0.000910638	0.291569	0.206	0.091	1	CLUH	0
chr20-10670060-10675444	0.0209767	0.291274	0.265	0.155	1	JAG1	0
chr14-104965858-104971069	0.00270074	0.290565	0.228	0.11	1	AHNAK2	0
chr15-40843518-40847910	0.00274168	0.289517	0.213	0.1	1	SPINT1	0
chr22-31342971-31348271	0.0298135	0.289423	0.206	0.12	1	PATZ1	0
chr1-209777156-209787921	0.00823323	0.289058	0.272	0.143	1	TRAF3IP3	0
chr5-107668639-107674086	0.00315514	0.287703	0.206	0.105	1	EFNA5	0
chr2-9752226-9755448	0.0125754	0.286996	0.272	0.14	1	RP11-521D12.5	2047
chr12-79688714-79693542	0.00259671	0.286541	0.221	0.104	1	PAWR	0
chr3-171808900-171812408	0.00666046	0.286459	0.228	0.118	1	PLD1	0
chr3-11769644-11772477	0.0026531	0.28525	0.213	0.101	1	VGLL4	0
chr12-10360877-10366580	0.0145891	0.285136	0.213	0.119	1	RP11-277P12.9	0
chr8-28889014-28891887	0.0083734	0.283743	0.272	0.154	1	INTS9	0
chr17-1397554-1400783	0.00330353	0.282854	0.206	0.091	1	YWHAE	0
chr17-7557918-7562742	0.0150854	0.28271	0.213	0.114	1	TNFSF13	0
chr3-184560819-184564305	0.00108825	0.282663	0.243	0.104	1	EPHB3	0
chr16-21300237-21303436	0.00303718	0.28186	0.25	0.123	1	CRYM	0
chr9-126791088-126794936	0.000848257	0.281586	0.213	0.082	1	ZBTB43	10069
chr4-70703611-70706941	0.00368216	0.28138	0.221	0.109	1	RUFY3	0
chr13-73057521-73063681	0.0893976	0.281049	0.221	0.139	1	KLF5	0
chr7-140058234-140063572	0.0964127	0.280427	0.228	0.149	1	PARP12	0
chr7-66098733-66100779	0.000229732	0.280164	0.206	0.077	1	AC068533.7	0
chr1-212605242-212610046	0.039556	0.279749	0.287	0.185	1	ATF3	0
chr6-158757559-158778866	0.0236145	0.278888	0.353	0.219	1	SYTL3	0
chr15-67146232-67151100	0.00255383	0.27789	0.213	0.101	1	SMAD3	0
chr8-127851047-127855136	0.00523753	0.277024	0.243	0.127	1	PVT1	0
chr18-48538347-48541856	0.00203903	0.276302	0.206	0.096	1	CTIF	0
chr4-36241368-36245483	0.0117318	0.275655	0.243	0.124	1	ARAP2	0
chr17-75720497-75724324	0.000755157	0.274586	0.206	0.087	1	ITGB4	0
chr1-153562384-153569153	0.0451117	0.274308	0.287	0.182	1	S100A2	0
chr18-63969491-63971859	0.019827	0.274233	0.235	0.138	1	SERPINB8	0
chr19-38647010-38653437	0.0364413	0.274176	0.221	0.128	1	ACTN4	0
chr11-57321143-57326267	0.0546735	0.272785	0.287	0.187	1	TNKS1BP1	0
chr3-46978819-46982763	0.0479368	0.272733	0.213	0.131	1	NBEAL2	0
chr1-26274649-26282205	0.0142043	0.272271	0.36	0.219	1	CEP85	0
chr5-172417983-172421717	0.00452233	0.271561	0.206	0.097	1	SH3PXD2B	0
chr17-16213785-16217990	0.0107328	0.271526	0.213	0.117	1	PIGL	0
chr17-73231232-73233606	0.000694267	0.271109	0.206	0.085	1	FAM104A	0
chr7-13988908-13992011	0.00165636	0.270614	0.213	0.096	1	ETV1	0
chr16-28923835-28926449	0.0459415	0.270269	0.235	0.142	1	RABEP2	0
chr1-50958804-50960962	0.0128473	0.270143	0.206	0.105	1	FAF1	0
chr5-149438507-149443111	0.00421761	0.267598	0.228	0.108	1	CARMN	5671
chr16-75564619-75567258	0.0178728	0.267396	0.221	0.115	1	GABARAPL2	0
chr1-32330904-32340142	0.0106016	0.266044	0.257	0.146	1	HDAC1	0
chr17-7237106-7243618	0.0614742	0.265375	0.272	0.183	1	PHF23	0
chr16-68753890-68757575	0.000508331	0.26204	0.228	0.093	1	CDH1	0
chr14-74565615-74575163	0.0174794	0.261897	0.287	0.163	1	LTBP2	0
chr1-16619880-16626800	0.0718826	0.259723	0.265	0.168	1	RP5-1182A14.5	2150
chr4-184811836-184816246	0.00558618	0.259052	0.243	0.119	1	ACSL1	0
chr14-68974665-68980657	0.0298375	0.2586	0.25	0.138	1	ACTN1	0
chr2-20446381-20453144	0.0926457	0.258546	0.221	0.145	1	RHOB	0
chr8-60651080-60654262	0.0524561	0.258211	0.228	0.132	1	RP11-91I20.2	0
chr1-44028340-44032982	0.0179516	0.257767	0.235	0.13	1	SLC6A9	0
chr5-140563605-140566282	0.0986277	0.257108	0.243	0.154	1	SLC35A4	0
chr1-211257195-211261568	0.0433532	0.25634	0.265	0.165	1	RCOR3	0
chr13-44434853-44438424	0.0155519	0.253615	0.206	0.112	1	TSC22D1	0
chr6-166626203-166628873	0.0129686	0.253551	0.235	0.135	1	RPS6KA2	0
chr15-60388751-60399288	0.448517	0.253462	0.353	0.275	1	ANXA2	0
chr12-39441796-39444564	0.040153	0.253258	0.206	0.123	1	KIF21A	0
chr21-34807148-34809433	0.0130206	0.253091	0.221	0.114	1	RUNX1	0
chr17-2510883-2512559	0.00317071	0.251675	0.206	0.097	1	METTL16	0
chr10-119650706-119660343	0.130681	0.251234	0.235	0.144	1	BAG3	0
chr20-23046486-23052027	0.0191525	0.250263	0.213	0.121	1	THBD	0
chr4-10018519-10024777	0.0587368	0.250184	0.228	0.141	1	SLC2A9	0
chr19-17074171-17080799	0.000959071	-0.256431	0.14	0.21	1	HAUS8	0
chr16-11250037-11259633	1.61101e-05	-0.268138	0.154	0.247	1	SOCS1	0
chr14-105485541-105492484	0.000195662	-0.274151	0.235	0.317	1	AL928654.7	0
chr7-44976959-44983291	7.46645e-06	-0.293797	0.132	0.241	1	MYO1G	0
chr8-143947872-143954294	2.79058e-06	-0.316306	0.125	0.233	0.386411	PLEC	0
chr5-43036374-43043685	8.74177e-06	-0.322258	0.096	0.214	1	ANXA2R	0
chr9-114381884-114391388	7.03208e-05	-0.327236	0.11	0.221	1	AKNA	0
chr9-129883906-129891273	5.05115e-07	-0.350147	0.169	0.299	0.0699433	FNBP1	0
chr5-100899872-100905687	2.92799e-07	-0.387078	0.081	0.203	0.0405438	ST8SIA4	0
chr17-45221264-45232108	2.00151e-10	-0.44566	0.066	0.229	2.77149e-05	FMNL1	0
chr17-58327653-58340507	1.4242e-09	-0.491542	0.088	0.26	0.000197209	TSPOAP1	0

## Sheet: Pro KC
	p_val	avg_log2FC	pct.1	pct.2	p_val_adj	gene	distance
chr1-209606824-209636948	4.41689e-14	0.868931	0.606	0.268	6.11607e-09	LAMB3	0
chr12-52511525-52526326	1.4368e-14	0.866949	0.483	0.168	1.98953e-09	KRT5	0
chr7-26177257-26189500	8.28199e-13	0.827049	0.444	0.166	1.14681e-07	NFE2L3	0
chr7-5418380-5430635	3.73418e-09	0.751703	0.533	0.239	0.000517071	TNRC18	0
chr17-81080227-81098476	4.50879e-09	0.696851	0.539	0.268	0.000624332	BAIAP2	0
chr8-127851047-127855136	8.85223e-15	0.6931	0.4	0.12	1.22577e-09	PVT1	0
chr8-143932885-143947259	2.4824e-05	0.692107	0.633	0.392	1	PLEC	0
chr1-153607928-153617769	1.26116e-07	0.685039	0.372	0.153	0.0174632	S100A14	0
chr1-16619880-16626800	1.39286e-12	0.676083	0.444	0.161	1.92869e-07	RP5-1182A14.5	2150
chr6-10411464-10420771	2.68208e-10	0.664765	0.378	0.133	3.71387e-05	TFAP2A	0
chr8-93873442-93876324	1.00669e-13	0.662274	0.389	0.111	1.39396e-08	PDP1	0
chr13-110345855-110348631	2.86699e-15	0.661484	0.367	0.096	3.96992e-10	COL4A2	0
chr7-538052-540641	2.48565e-14	0.656934	0.328	0.076	3.44188e-09	PRKAR1B	8555
chr1-155123866-155130825	8.33834e-11	0.656127	0.389	0.135	1.15461e-05	EFNA1	0
chr7-830368-833915	2.44941e-10	0.630686	0.356	0.109	3.3917e-05	SUN1	0
chr17-50054902-50065400	6.17969e-10	0.62063	0.422	0.163	8.55702e-05	ITGA3	0
chr14-50954757-50957739	4.99986e-13	0.620031	0.339	0.092	6.9233e-08	RP11-218E20.3	0
chr14-74565615-74575163	8.51008e-08	0.617425	0.394	0.158	0.0117839	LTBP2	0
chr8-133281263-133298701	5.55682e-06	0.614055	0.55	0.293	0.769453	NDRG1	0
chr2-105403206-105406633	2.00107e-15	0.602201	0.278	0.051	2.77088e-10	FHL2	0
chr2-20576107-20580262	5.79143e-12	0.599805	0.378	0.121	8.01939e-07	HS1BP3	0
chr20-45336372-45349001	9.23241e-09	0.597998	0.456	0.203	0.00127841	SDC4	0
chr11-118908941-118915852	1.09924e-07	0.581766	0.372	0.17	0.0152211	BCL9L	0
chr1-10897436-10902165	2.68736e-11	0.578336	0.328	0.093	3.72118e-06	C1orf127	44305
chr3-44883230-44887344	2.36037e-12	0.573149	0.278	0.072	3.2684e-07	TGM4	0
chr11-65433938-65450914	0.000190293	0.572225	0.433	0.234	1	NEAT1	0
chr17-72586763-72593142	2.4846e-11	0.569481	0.317	0.091	3.44042e-06	LINC00511	0
chr7-70594952-70600394	4.86544e-13	0.567509	0.356	0.098	6.73718e-08	AUTS2	0
chr2-113238800-113242094	5.09419e-08	0.564587	0.333	0.125	0.00705392	PAX8	0
chr18-79959659-79965896	2.06027e-07	0.561734	0.333	0.141	0.0285286	HSBP1L1	0
chr9-81686202-81691058	5.23771e-06	0.560047	0.328	0.137	0.725265	TLE1	0
chr7-27110541-27116749	5.58384e-11	0.56004	0.306	0.081	7.73195e-06	HOXA3	0
chr1-201282986-201290227	5.42992e-09	0.558773	0.278	0.089	0.000751881	PKP1	0
chr12-52903190-52908801	1.60499e-10	0.550986	0.328	0.097	2.22243e-05	KRT8	0
chr8-101490687-101495470	1.71972e-10	0.549947	0.289	0.082	2.38129e-05	GRHL2	0
chr9-121285673-121290287	1.17425e-05	0.548193	0.339	0.149	1	GSN	0
chr20-57990397-57992173	2.95356e-13	0.545163	0.278	0.065	4.08979e-08	RP13-379L11.4	11730
chr7-1456830-1464247	0.00150529	0.545048	0.367	0.209	1	MICALL2	0
chr7-16644102-16649460	0.00597	0.544239	0.372	0.224	1	ANKMY2	0
chr1-209804448-209811098	6.02732e-09	0.542563	0.339	0.127	0.000834603	IRF6	0
chr14-85527826-85537112	3.27206e-07	0.540917	0.333	0.128	0.0453082	FLRT2	0
chr1-201304856-201312933	4.86407e-06	0.540766	0.344	0.143	0.673528	PKP1	0
chr3-194132289-194142788	0.000172369	0.540277	0.444	0.226	1	HES1	0
chr8-102755792-102759504	5.30039e-09	0.539239	0.328	0.114	0.000733946	KB-1732A1.1	46012
chr14-50037808-50041088	3.92459e-06	0.537389	0.433	0.214	0.543438	LINC01588	0
chr7-26346250-26348460	3.8956e-08	0.536761	0.289	0.102	0.00539424	SNX10	0
chr9-33128157-33133985	5.96708e-07	0.535104	0.289	0.103	0.0826262	B4GALT1	0
chr1-202105439-202108928	4.83272e-14	0.534788	0.289	0.067	6.69187e-09	GPR37L1	13929
chr1-47188652-47193453	2.07422e-09	0.534574	0.278	0.081	0.000287218	PDZK1IP1	0
chr20-50438788-50441903	2.19731e-07	0.530381	0.333	0.125	0.0304261	PTPN1	68417
chr8-38994821-39000800	0.000283764	0.530307	0.433	0.249	1	TM2D2	0
chr8-98163665-98168987	2.01575e-07	0.529903	0.25	0.082	0.0279122	POP1	3830
chr8-119206520-119210051	1.57272e-13	0.529412	0.322	0.079	2.17774e-08	MAL2	0
chr1-234655248-234659980	1.07615e-08	0.528658	0.361	0.128	0.00149014	RP4-781K5.4	0
chr7-21943914-21946707	2.60735e-09	0.527887	0.267	0.081	0.00036104	CDCA7L	0
chr1-202007313-202012447	3.89189e-10	0.527505	0.294	0.087	5.3891e-05	ELF3	0
chr8-118107074-118113791	0.000108684	0.526593	0.378	0.199	1	EXT1	0
chr9-126791088-126794936	6.65963e-09	0.526408	0.272	0.079	0.000922159	ZBTB43	10069
chr17-77318478-77326265	3.29734e-07	0.525331	0.422	0.18	0.0456582	SEPT9	0
chr17-48045207-48056248	0.000368592	0.525125	0.489	0.277	1	NFE2L1	0
chr1-235067221-235070844	2.51189e-07	0.524223	0.306	0.11	0.0347821	LINC01348	0
chr7-20328961-20332902	8.49315e-08	0.523837	0.378	0.16	0.0117605	ITGB8	0
chr8-48919517-48924247	1.13962e-09	0.523767	0.322	0.099	0.000157803	SNAI2	0
chr16-54926352-54933952	4.70683e-05	0.521612	0.344	0.164	1	IRX5	0
chr11-67053586-67058030	2.84316e-09	0.52042	0.289	0.094	0.000393692	RHOD	0
chr8-141151879-141154715	7.81175e-09	0.51933	0.294	0.099	0.00108169	DENND3	0
chr12-95203187-95207056	4.58371e-09	0.518855	0.317	0.098	0.000634706	FGD6	0
chr12-96218981-96221861	1.75938e-07	0.51818	0.25	0.08	0.0243622	ELK3	0
chr7-21426219-21428912	0.00145051	0.516979	0.433	0.272	1	SP4	0
chr4-30716121-30724762	3.66404e-08	0.516208	0.317	0.107	0.0050736	PCDH7	0
chr16-57618281-57624001	3.27938e-11	0.516143	0.3	0.08	4.54096e-06	ADGRG1	0
chr1-33218666-33222920	4.28339e-11	0.515398	0.244	0.061	5.93121e-06	ZNF362	33624
chr3-48597347-48600100	2.72659e-12	0.515213	0.278	0.064	3.77551e-07	UQCRC1	0
chr14-22977078-22983735	1.12639e-06	0.514956	0.361	0.144	0.155971	RP11-298I3.5	0
chr7-24978357-24983145	9.47859e-05	0.514911	0.444	0.243	1	OSBPL3	0
chr3-189936137-189938326	8.8775e-11	0.514668	0.239	0.056	1.22927e-05	P3H2	18401
chr20-35302639-35308856	9.38807e-08	0.514487	0.311	0.12	0.0129997	UQCC1	0
chr4-99815106-99818874	1.47793e-05	0.514364	0.322	0.146	1	DAPP1	0
chr7-100762580-100765751	1.24368e-10	0.512298	0.256	0.072	1.72213e-05	ZAN	0
chr1-32758150-32762250	5.30834e-09	0.510962	0.267	0.076	0.000735046	KIAA1522	0
chr14-32075010-32079350	1.57087e-06	0.510164	0.35	0.146	0.217518	ARHGAP5	0
chr1-209648256-209656433	1.6027e-05	0.509676	0.344	0.147	1	LAMB3	0
chr11-120121014-120125581	1.0208e-08	0.508639	0.306	0.107	0.00141351	TRIM29	0
chr17-77284839-77289448	1.02674e-06	0.50862	0.317	0.118	0.142173	SEPT9	0
chr8-133247179-133280717	0.00300839	0.507428	0.417	0.253	1	NDRG1	0
chr16-81530134-81534013	5.13458e-09	0.506046	0.267	0.075	0.000710985	CMIP	0
chr9-107486739-107491469	1.47465e-06	0.505679	0.317	0.123	0.204195	KLF4	0
chr7-1074883-1077090	7.28962e-12	0.502952	0.256	0.059	1.00939e-06	C7orf50	0
chr1-9699160-9702658	5.53112e-11	0.501686	0.244	0.056	7.65894e-06	PIK3CD	0
chr17-81114806-81120567	2.44859e-06	0.50077	0.228	0.086	0.339056	BAIAP2	0
chr6-31829600-31837908	0.00209715	0.500656	0.372	0.215	1	C6orf48	0
chr2-9797556-9803881	5.32802e-06	0.499239	0.344	0.138	0.737771	RP11-521D12.5	27214
chr1-58571954-58579395	2.83504e-05	0.498473	0.344	0.154	1	TACSTD2	0
chr8-124626462-124630769	1.68779e-05	0.497906	0.306	0.13	1	MTSS1	0
chr14-51532746-51535199	1.0288e-11	0.49683	0.283	0.072	1.42457e-06	FRMD6-AS2	0
chr2-108921582-108923794	4.16722e-09	0.496743	0.211	0.051	0.000577035	EDAR	0
chr14-35331537-35338223	7.28279e-05	0.496709	0.356	0.17	1	PSMA6	14043
chr4-186723013-186729519	7.46572e-07	0.49626	0.267	0.087	0.103378	FAT1	0
chr5-132468821-132493402	0.00287868	0.495641	0.633	0.429	1	IRF1	0
chr12-52145473-52150414	2.89335e-08	0.49498	0.289	0.09	0.00400643	KRT80	18581
chr12-12898275-12902444	9.90919e-09	0.494834	0.256	0.074	0.00137213	GPRC5A	0
chr8-41306283-41310084	1.03856e-09	0.493739	0.244	0.067	0.000143809	SFRP1	0
chr15-83377417-83381192	2.07637e-09	0.493015	0.233	0.069	0.000287514	SH3GL3	66035
chr4-168587077-168590052	3.2338e-10	0.492992	0.306	0.085	4.47785e-05	PALLD	0
chr7-6382160-6388444	2.36172e-05	0.491837	0.306	0.121	1	RAC1	0
chr1-31572643-31578235	3.0097e-10	0.491543	0.294	0.08	4.16753e-05	TINAGL1	0
chr5-151568943-151573888	3.31911e-08	0.491444	0.261	0.081	0.00459597	FAT2	0
chr22-27473268-27475978	4.28888e-10	0.491348	0.272	0.074	5.93881e-05	RP11-46E17.6	13207
chr20-45778716-45782131	8.3414e-10	0.490324	0.233	0.059	0.000115503	WFDC3	0
chr3-11136116-11138287	3.1733e-10	0.489821	0.289	0.081	4.39407e-05	HRH1	0
chr1-153562384-153569153	6.83866e-05	0.489514	0.372	0.178	1	S100A2	0
chr6-54846102-54850090	5.89004e-09	0.48939	0.272	0.083	0.000815594	FAM83B	0
chr3-58048021-58053067	2.73416e-05	0.48933	0.25	0.094	1	FLNB	0
chr9-114276458-114279762	8.31088e-07	0.488706	0.228	0.073	0.115081	COL27A1	0
chr8-117946113-117948420	8.36533e-11	0.488501	0.256	0.066	1.15835e-05	EXT1	0
chr7-22355561-22358455	1.20179e-08	0.487561	0.244	0.071	0.00166412	RAPGEF5	0
chr16-29943505-29945187	1.97517e-11	0.487251	0.244	0.057	2.73501e-06	TMEM219	0
chr8-94638674-94643341	9.59793e-08	0.486919	0.306	0.107	0.0132903	ESRP1	0
chr7-18508198-18510048	1.42948e-07	0.48685	0.3	0.101	0.019794	HDAC9	0
chr8-39939247-39944548	0.00070929	0.485726	0.3	0.143	1	IDO2	0
chr6-11769220-11773392	1.76802e-05	0.485497	0.339	0.135	1	ADTRP	0
chr7-94655213-94658854	1.16261e-07	0.484858	0.317	0.124	0.0160986	PEG10	0
chr1-24282551-24287047	8.0956e-07	0.478425	0.211	0.068	0.1121	GRHL3	32274
chr17-82874298-82877343	9.28975e-09	0.478227	0.272	0.079	0.00128635	TBCD	0
chr3-13849675-13854637	6.63095e-06	0.478064	0.228	0.085	0.918188	WNT7A	0
chr18-31486103-31490891	7.05731e-09	0.477809	0.25	0.07	0.000977226	RP11-650P15.1	5753
chr9-115113920-115119480	9.59338e-07	0.477677	0.289	0.102	0.13284	TNC	0
chr8-66521441-66523737	1.17997e-09	0.477435	0.283	0.08	0.00016339	C8orf46	2916
chr7-2518751-2524685	0.00564951	0.477378	0.383	0.224	1	LFNG	0
chr7-26196189-26204955	0.0013154	0.477291	0.45	0.26	1	HNRNPA2B1	0
chr9-92714628-92718667	3.68537e-10	0.477054	0.267	0.072	5.10314e-05	BICD2	0
chr9-133990398-133995192	2.2559e-05	0.476688	0.317	0.127	1	VAV2	0
chr7-76301804-76308290	0.00243639	0.475976	0.328	0.172	1	HSPB1	0
chr14-67409293-67414921	1.18446e-07	0.47553	0.367	0.133	0.0164013	PLEK2	0
chr3-52045237-52048874	2.89146e-07	0.474166	0.256	0.085	0.0400381	DUSP7	44
chr2-46845614-46851336	5.35716e-10	0.470354	0.317	0.095	7.41806e-05	LINC01119	0
chr14-53953045-53957500	6.86091e-08	0.468602	0.244	0.068	0.0095003	BMP4	0
chr8-100414190-100418456	2.95284e-07	0.468479	0.3	0.118	0.040888	KB-173C10.2	0
chr18-31098860-31104890	5.09092e-09	0.468241	0.261	0.077	0.00070494	DSC2	0
chr9-134355176-134359939	1.96957e-07	0.467668	0.256	0.081	0.0272726	RXRA	0
chr7-74475339-74484097	0.000229024	0.467292	0.306	0.136	1	GTF2IRD1	0
chr7-36387548-36394002	0.0002882	0.466899	0.306	0.141	1	KIAA0895	0
chr1-16152485-16159674	1.64128e-06	0.466885	0.294	0.114	0.227267	EPHA2	0
chr7-16914751-16918933	1.38641e-07	0.465712	0.261	0.084	0.0191977	AGR3	32763
chr12-10360877-10366580	4.18162e-06	0.465042	0.289	0.115	0.579029	RP11-277P12.9	0
chr7-30167966-30173965	0.000178482	0.46471	0.3	0.13	1	AC007036.6	2421
chr7-42235731-42239516	1.85358e-07	0.463984	0.278	0.089	0.0256666	GLI3	0
chr5-122180306-122184092	2.58258e-09	0.463318	0.261	0.069	0.00035761	CTC-441N14.4	0
chr20-62364356-62370839	4.54496e-05	0.462052	0.217	0.078	1	LAMA5	0
chr1-212615417-212623957	1.28108e-07	0.461808	0.233	0.079	0.0177391	ATF3	0
chr3-129793008-129796074	2.57152e-10	0.461797	0.25	0.064	3.56079e-05	TMCC1	0
chr7-1566751-1572625	0.00396457	0.461634	0.3	0.164	1	PSMG3	0
chr8-102787762-102791811	1.45801e-05	0.461157	0.306	0.129	1	KB-1732A1.1	13705
chr11-120130775-120138761	5.522e-06	0.461119	0.278	0.102	0.764631	TRIM29	0
chr11-122802816-122805434	9.70353e-07	0.461081	0.256	0.089	0.134365	UBASH3B	0
chr9-14312158-14316449	8.17144e-07	0.461078	0.261	0.086	0.11315	NFIB	0
chr9-133873244-133877598	2.87816e-06	0.460615	0.261	0.093	0.398539	VAV2	0
chr2-20230680-20233403	1.65717e-06	0.460576	0.25	0.08	0.229468	SDC1	5246
chr13-31127216-31138645	1.77823e-05	0.460221	0.267	0.111	1	HSPH1	0
chr17-81068768-81077035	8.05779e-09	0.45946	0.2	0.051	0.00111576	BAIAP2	0
chr8-125543754-125547588	7.16138e-07	0.458132	0.25	0.084	0.0991636	RP11-136O12.2	2380
chr12-127059975-127063955	4.84006e-11	0.456739	0.222	0.046	6.70203e-06	RP11-575F12.1	0
chr12-2957831-2961108	7.19313e-07	0.456054	0.233	0.077	0.0996032	TEAD4	0
chr7-17937262-17941562	0.000299331	0.455409	0.311	0.143	1	SNX13	0
chr17-80898767-80902028	1.49484e-08	0.454857	0.217	0.061	0.0020699	RPTOR	0
chr1-208183878-208185268	5.06529e-12	0.453854	0.222	0.048	7.0139e-07	PLXNA2	0
chr14-51394650-51397343	1.24652e-08	0.452969	0.244	0.066	0.00172605	RP11-255G12.3	0
chr7-25861655-25863175	0.00036375	0.451984	0.239	0.11	1	CTD-2227E11.1	85481
chr9-97802113-97804724	1.20819e-07	0.451968	0.217	0.06	0.0167298	PTCSC2	1210
chr8-127667951-127671494	1.08774e-09	0.451887	0.294	0.088	0.00015062	CASC11	14848
chr1-202282144-202285086	1.83271e-09	0.45008	0.2	0.046	0.000253775	LGR6	0
chr13-106471632-106473242	8.02753e-08	0.449996	0.244	0.073	0.0111157	EFNB2	16488
chr17-39737598-39741791	6.6721e-07	0.449635	0.256	0.088	0.0923886	GRB7	0
chr7-5591147-5597183	0.0011351	0.449495	0.3	0.137	1	FSCN1	0
chr2-235025542-235028826	1.43945e-08	0.447952	0.228	0.063	0.00199321	SH3BP4	0
chr8-127034776-127036681	2.2794e-08	0.447446	0.239	0.071	0.00315628	PCAT1	13761
chr7-3955694-3958975	1.26573e-08	0.446677	0.222	0.064	0.00175266	SDK1	0
chr16-10616224-10620076	8.99208e-09	0.446659	0.261	0.076	0.00124513	TEKT5	7424
chr9-121972001-121973418	7.26384e-11	0.445847	0.222	0.049	1.00582e-05	TTLL11	0
chr17-81417034-81420663	1.0289e-07	0.445728	0.256	0.081	0.0142472	BAHCC1	0
chr20-50761281-50763171	4.20145e-09	0.445301	0.222	0.053	0.000581774	PARD6B	4485
chr22-37524937-37527822	1.82424e-08	0.444762	0.239	0.069	0.00252602	CARD10	5394
chr3-11769644-11772477	6.51999e-08	0.444489	0.278	0.098	0.00902822	VGLL4	0
chr9-137611010-137612911	2.59285e-08	0.444457	0.211	0.054	0.00359032	ARRDC1	0
chr9-130444395-130448637	2.35235e-07	0.442894	0.25	0.078	0.032573	ASS1	0
chr7-4005468-4007840	4.5232e-08	0.442237	0.244	0.07	0.00626327	SDK1	0
chr11-118916562-118930895	0.0271685	0.441489	0.561	0.382	1	BCL9L	0
chr9-121698803-121703616	7.25985e-06	0.441352	0.267	0.099	1	DAB2IP	0
chr12-95114981-95119047	7.77413e-08	0.440475	0.261	0.088	0.0107648	FGD6	0
chr1-227945830-227948947	7.27905e-09	0.440106	0.222	0.057	0.00100793	WNT9A	0
chr2-17538045-17541884	1.40433e-10	0.439304	0.25	0.065	1.94458e-05	VSNL1	0
chr16-4942974-4946377	4.14247e-08	0.439132	0.239	0.068	0.00573608	PPL	0
chr18-49019310-49022399	3.94677e-07	0.438622	0.233	0.073	0.0546509	DYM	19074
chr14-64722497-64727332	2.48637e-07	0.437467	0.25	0.081	0.0344288	PLEKHG3	0
chr8-92964702-92966603	0.000183253	0.436928	0.239	0.094	1	TRIQK	0
chr1-206512362-206514209	2.27158e-11	0.436367	0.233	0.052	3.14546e-06	RASSF5	0
chr1-151991753-151996281	0.00901618	0.436207	0.317	0.177	1	S100A10	0
chr14-102069030-102084339	0.0203962	0.435655	0.283	0.169	1	HSP90AA1	0
chr5-145936114-145942771	4.10867e-07	0.435453	0.3	0.114	0.0568927	SH3RF2	0
chr1-26997530-27003682	0.00786853	0.434589	0.261	0.132	1	TRNP1	0
chr5-149438507-149443111	1.69548e-05	0.434282	0.272	0.105	1	CARMN	5671
chr1-34779414-34784174	4.53201e-07	0.434023	0.244	0.081	0.0627548	GJB3	0
chr7-5522350-5533466	0.0098095	0.433229	0.394	0.234	1	ACTB	0
chr9-137082980-137087975	0.0158739	0.432367	0.394	0.23	1	MAN1B1	0
chr9-109315925-109321547	8.62864e-07	0.432185	0.261	0.094	0.119481	EPB41L4B	0
chr9-106859888-106865163	4.13056e-05	0.431806	0.244	0.093	1	ZNF462	0
chr8-89756030-89760545	0.000293293	0.431783	0.294	0.129	1	RIPK2	0
chr8-125173121-125177150	3.81276e-08	0.4315	0.222	0.067	0.00527953	NSMCE2	0
chr14-64702992-64709165	0.00688693	0.43137	0.272	0.138	1	PLEKHG3	0
chr10-69446251-69454235	0.00172635	0.431075	0.272	0.121	1	TSPAN15	0
chr9-4738871-4743901	1.10716e-05	0.431005	0.294	0.123	1	AK3	0
chr14-81399830-81402592	0.000148649	0.429915	0.228	0.093	1	STON2	0
chr6-2809516-2810872	9.96574e-06	0.429676	0.217	0.073	1	SERPINB1	21459
chr5-177299806-177305276	0.000742624	0.429279	0.344	0.179	1	PRELID1	0
chr6-48826732-48828018	1.24381e-10	0.428898	0.228	0.054	1.7223e-05	MUT	602341
chr22-37544072-37547521	8.89065e-06	0.42876	0.233	0.08	1	CDC42EP1	12925
chr7-812310-813940	4.38111e-07	0.428544	0.239	0.078	0.0606653	SUN1	2674
chr8-53879508-53882648	7.5698e-07	0.428081	0.228	0.065	0.104819	RGS20	0
chr3-157127459-157133020	1.77284e-05	0.427627	0.333	0.143	1	LINC00880	4454
chr16-56605911-56612087	0.0157029	0.427256	0.378	0.231	1	MT2A	0
chr2-74439273-74442790	1.81727e-06	0.426911	0.261	0.095	0.251637	RTKN	0
chr12-53228986-53234580	4.07195e-05	0.426895	0.272	0.113	1	RARG	0
chr12-94560492-94562598	2.87745e-08	0.426553	0.239	0.075	0.00398441	TMCC3	4525
chr5-122162887-122164825	3.59943e-08	0.42526	0.211	0.055	0.00498413	CTC-441N14.4	0
chr3-141366115-141370823	2.52446e-05	0.425256	0.267	0.106	1	PXYLP1	0
chr9-128890117-128893192	4.45813e-06	0.425181	0.217	0.076	0.617317	LRRC8A	0
chr8-85834906-85837948	1.56869e-07	0.424683	0.239	0.076	0.0217217	CTA-392E5.1	1756
chr1-26861116-26866508	0.00531896	0.423589	0.367	0.207	1	SFN	0
chr8-102804494-102811694	0.201962	0.422265	0.428	0.291	1	KB-1732A1.1	0
chr1-154430869-154433820	1.91972e-08	0.421784	0.311	0.098	0.00265824	IL6R	0
chr7-101880342-101883545	8.54957e-07	0.421479	0.267	0.091	0.118386	CUX1	0
chr6-52503236-52505138	4.00105e-05	0.420896	0.256	0.094	1	TRAM2	0
chr12-57164828-57167781	1.31125e-06	0.419766	0.2	0.064	0.181569	LRP1	0
chr7-20351713-20353560	3.96496e-09	0.418731	0.217	0.055	0.000549028	ITGB8	0
chr19-48501173-48502809	9.63825e-09	0.418546	0.239	0.067	0.00133461	LMTK3	0
chr16-31197516-31205376	0.00758938	0.417913	0.239	0.121	1	PYCARD	0
chr6-7540405-7543519	2.79193e-09	0.417818	0.233	0.061	0.000386599	DSP	0
chr12-53427606-53428975	3.32185e-12	0.417758	0.222	0.044	4.59976e-07	AMHR2	0
chr7-27094778-27099383	0.0019215	0.417658	0.267	0.133	1	HOXA1	0
chr11-33633052-33637197	1.34118e-07	0.416981	0.206	0.058	0.0185713	KIAA1549L	0
chr22-33919207-33922933	1.36967e-05	0.416175	0.211	0.071	1	LARGE1	0
chr6-30882278-30886998	3.28671e-05	0.416018	0.261	0.099	1	DDR1	0
chr5-151612828-151616244	3.60618e-05	0.415489	0.217	0.077	1	FAT2	43883
chr11-119691013-119695639	1.91812e-06	0.415326	0.228	0.076	0.265602	NECTIN1	0
chr11-130178019-130182601	2.94051e-05	0.414829	0.239	0.082	1	ST14	0
chr14-93936225-93942264	0.00201219	0.41444	0.244	0.12	1	ASB2	0
chr15-40238569-40242054	1.33009e-07	0.413724	0.217	0.064	0.0184178	BUB1B-PAK6	0
chr7-55018601-55022982	2.23079e-07	0.413483	0.228	0.068	0.0308898	EGFR	0
chr6-30489007-30497287	0.00978708	0.413045	0.394	0.223	1	HLA-E	0
chr1-234996913-234999008	8.5716e-07	0.412976	0.267	0.09	0.118691	RP11-443B7.3	16108
chr1-63661695-63663899	2.03115e-09	0.412879	0.233	0.066	0.000281253	PGM1	1449
chr9-137310091-137312696	9.98363e-06	0.411715	0.206	0.069	1	EXD3	0
chr16-82626674-82631038	2.09938e-05	0.411532	0.228	0.079	1	CDH13	0
chr17-82528524-82532054	7.75585e-07	0.411354	0.206	0.064	0.107395	FOXK2	0
chr1-1162504-1166362	2.60139e-07	0.410976	0.2	0.05	0.0360214	RP11-465B22.8	2994
chr16-88767672-88771564	2.1383e-07	0.410545	0.217	0.063	0.029609	PIEZO1	0
chr12-122886740-122890845	0.000292202	0.410085	0.267	0.122	1	VPS37B	0
chr20-6121523-6123872	1.75271e-07	0.409697	0.233	0.069	0.0242697	FERMT1	0
chr2-240433399-240436976	2.68401e-05	0.409665	0.239	0.093	1	GPC1	0
chr7-106064189-106066410	3.3497e-10	0.409527	0.217	0.055	4.63832e-05	SYPL1	24092
chr8-103498327-103502156	2.57895e-05	0.409301	0.25	0.094	1	RIMS2	0
chr20-57617759-57623159	0.000257008	0.408674	0.317	0.153	1	ZBP1	0
chr2-29063020-29067785	2.58095e-08	0.408422	0.217	0.056	0.00357384	C2orf71	0
chr11-73113287-73115370	1.01819e-07	0.408422	0.206	0.053	0.0140988	FCHSD2	0
chr7-2553567-2556245	0.000370767	0.408407	0.244	0.103	1	BRAT1	0
chr1-202014791-202019754	1.70593e-07	0.4078	0.228	0.064	0.0236221	ELF3	0
chr7-27739164-27742688	0.00214711	0.407715	0.35	0.181	1	TAX1BP1	0
chr1-109239358-109241469	3.68183e-07	0.407682	0.222	0.07	0.0509822	SARS	1188
chr11-120107916-120112996	4.98818e-07	0.407663	0.217	0.064	0.0690714	TRIM29	0
chr5-140344522-140349935	0.0004418	0.407267	0.25	0.115	1	HBEGF	0
chr9-69172431-69177393	0.00628273	0.406844	0.289	0.149	1	TJP2	0
chr7-2819233-2822543	4.88734e-06	0.40677	0.256	0.093	0.67675	GNA12	0
chr18-48936847-48953449	0.0650642	0.406754	0.461	0.288	1	SMAD7	0
chr21-45403035-45406647	1.03816e-05	0.406621	0.217	0.073	1	COL18A1	0
chr21-38804164-38811850	0.00353503	0.406304	0.356	0.192	1	ETS2	0
chr9-134322613-134330454	0.00348111	0.406093	0.267	0.131	1	RXRA	0
chr8-127948704-127951059	4.96308e-06	0.405419	0.228	0.08	0.687238	PVT1	0
chr9-100425809-100430761	0.000763788	0.404725	0.3	0.142	1	MSANTD3	0
chr14-105090202-105095314	0.00164071	0.404645	0.25	0.121	1	RP11-44N21.1	0
chr13-113836820-113839008	1.77056e-09	0.404471	0.217	0.051	0.00024517	GAS6	0
chr12-52492356-52497337	0.000169753	0.404164	0.211	0.09	1	KRT6A	0
chr5-150640103-150643189	3.15214e-08	0.404117	0.244	0.072	0.00436476	SYNPO	0
chr7-76422969-76424969	3.12987e-09	0.403332	0.217	0.055	0.000433393	ZP3	0
chr9-108550995-108553780	5.58088e-05	0.402513	0.228	0.088	1	RP11-339N8.1	147589
chr7-80940382-80942978	3.59628e-07	0.40235	0.228	0.064	0.0497977	SEMA3C	18022
chr3-12756236-12761464	1.64046e-06	0.402329	0.228	0.077	0.227155	TMEM40	0
chr1-8002488-8007201	5.34077e-06	0.402232	0.217	0.07	0.739537	ERRFI1	0
chr11-118262015-118266460	5.3525e-07	0.402117	0.233	0.076	0.074116	MPZL2	0
chr12-120228084-120233246	0.00333668	0.401795	0.289	0.138	1	PXN	0
chr6-84762402-84765124	5.85823e-10	0.4017	0.211	0.046	8.1119e-05	TBX18	0
chr9-112165930-112170950	2.22089e-06	0.401476	0.244	0.081	0.307527	SUSD1	0
chr3-193828308-193832917	1.64761e-06	0.40117	0.278	0.098	0.228144	RP11-528A4.2	9642
chr2-219272782-219275090	5.09216e-08	0.400731	0.211	0.055	0.00705111	TUBA4A	0
chr20-50320253-50322457	0.000370901	0.400555	0.206	0.079	1	LINC01271	0
chr14-51487932-51492548	5.52283e-06	0.40037	0.217	0.074	0.764746	FRMD6	0
chr3-5021409-5024320	7.86547e-06	0.400065	0.261	0.093	1	BHLHE40	36085
chr9-27527383-27533705	0.00286061	0.400001	0.283	0.138	1	MOB3B	0
chr1-201459938-201463413	4.37059e-06	0.399457	0.206	0.071	0.605196	PHLDA3	969
chr7-17598737-17600955	1.63169e-09	0.399317	0.206	0.046	0.00022594	AC017060.1	39827
chr3-61560415-61563337	2.52237e-06	0.399144	0.206	0.058	0.349273	PTPRG	0
chr8-101006970-101008643	3.10418e-12	0.39874	0.2	0.033	4.29835e-07	FLJ42969	43410
chr14-104965858-104971069	0.000129855	0.398596	0.267	0.107	1	AHNAK2	0
chr3-49899836-49904598	0.00864662	0.398459	0.233	0.122	1	MST1R	0
chr3-159761432-159767006	0.00302815	0.39824	0.333	0.164	1	IQCJ-SCHIP1	0
chr1-156745915-156752597	0.00198221	0.39813	0.406	0.22	1	HDGF	0
chr14-104972077-104974861	6.53855e-06	0.397297	0.233	0.08	0.905394	AHNAK2	0
chr16-68233046-68238314	0.00125966	0.39704	0.311	0.151	1	ESRP2	0
chr16-48606839-48614060	0.0373724	0.396627	0.422	0.279	1	N4BP1	0
chr13-106532071-106536884	0.00169438	0.396335	0.317	0.158	1	EFNB2	0
chr1-26856923-26859779	7.31231e-07	0.39568	0.228	0.072	0.101254	ZDHHC18	0
chr1-206889743-206891666	6.32608e-05	0.394664	0.206	0.074	1	IL24	5776
chr7-99616143-99619435	0.000179974	0.393889	0.211	0.083	1	ZSCAN25	0
chr5-73653800-73655350	2.67524e-08	0.393493	0.206	0.051	0.00370441	ARHGEF28	0
chr14-94109032-94116766	4.19124e-05	0.393382	0.222	0.08	1	IFI27	0
chr2-132415313-132419694	2.06734e-06	0.39319	0.211	0.065	0.286265	GPR39	0
chr14-55446114-55448925	5.56506e-06	0.393152	0.222	0.077	0.770594	TBPL2	0
chr6-12287174-12292574	0.000167358	0.392617	0.25	0.097	1	EDN1	0
chr12-49264006-49270387	0.00158125	0.392067	0.356	0.185	1	TUBA1C	0
chr8-125429040-125437118	0.0352862	0.391829	0.439	0.286	1	TRIB1	0
chr17-73303555-73308978	4.47338e-05	0.391663	0.2	0.064	1	CDC42EP4	0
chr4-110620515-110623552	8.49488e-08	0.391406	0.222	0.06	0.0117629	PITX2	0
chr7-44998963-45003041	0.00145197	0.391265	0.367	0.194	1	CCM2	0
chr9-127565629-127571110	0.0168831	0.391003	0.267	0.14	1	FAM129B	0
chr9-136575965-136579892	8.60177e-06	0.3909	0.217	0.068	1	NOTCH1	30102
chr20-44495168-44497532	2.4883e-05	0.390445	0.222	0.087	1	SERINC3	0
chr3-177447837-177450193	1.97371e-05	0.390176	0.228	0.079	1	LINC00578	0
chr9-98248043-98257070	0.0912304	0.389832	0.361	0.234	1	TBC1D2	0
chr1-206000546-206004026	1.42978e-05	0.388783	0.261	0.094	1	RAB7B	0
chr9-70418004-70422858	0.00995667	0.388766	0.417	0.241	1	KLF9	3379
chr1-116909265-116913870	6.17369e-06	0.388646	0.222	0.077	0.854871	PTGFRN	0
chr14-24309449-24317983	0.00515519	0.388505	0.311	0.163	1	LTB4R	0
chr9-136557690-136559200	3.44652e-08	0.388024	0.211	0.057	0.0047724	NOTCH1	11827
chr5-67009862-67012783	7.39362e-06	0.3877	0.222	0.078	1	MAST4	0
chr17-58516655-58519928	0.00840667	0.387482	0.356	0.225	1	MTMR4	0
chr7-6503119-6506544	0.000274907	0.386987	0.3	0.141	1	GRID2IP	0
chr7-48084558-48090704	0.0987891	0.38697	0.372	0.248	1	UPP1	0
chr10-24463463-24468630	7.05334e-06	0.38689	0.217	0.073	0.976676	KIAA1217	0
chr1-202964308-202969482	0.000215634	0.386388	0.311	0.143	1	CYB5R1	0
chr11-70139657-70142938	2.30957e-07	0.386229	0.211	0.058	0.0319806	ANO1	0
chr5-52987454-52991148	6.82113e-07	0.385909	0.267	0.098	0.0944521	ITGA2	0
chr4-145732707-145735957	0.0341441	0.385721	0.222	0.122	1	C4orf51	0
chr6-13479796-13482032	5.57527e-09	0.385645	0.211	0.053	0.000772008	GFOD1	0
chr6-33619096-33623618	0.000937775	0.385534	0.289	0.129	1	ITPR3	0
chr20-50979765-50982819	4.01555e-06	0.385362	0.228	0.071	0.556033	MOCS3	15833
chr15-31396482-31400758	1.01722e-05	0.384906	0.244	0.093	1	KLF13	0
chr1-36133357-36137018	1.35751e-06	0.384732	0.206	0.063	0.187975	TRAPPC3	0
chr12-13194212-13199422	0.000133703	0.384581	0.283	0.121	1	EMP1	0
chr3-134325431-134328812	1.47468e-06	0.384248	0.206	0.064	0.204198	RP11-200A1.1	4259
chr12-12890294-12893315	3.85151e-06	0.383967	0.222	0.079	0.533319	GPRC5A	0
chr5-32504374-32509501	0.000104219	0.383646	0.222	0.089	1	SUB1	22131
chr14-51093615-51096327	1.53776e-05	0.382894	0.25	0.101	1	TRIM9	0
chr3-120144263-120146486	1.09803e-07	0.382785	0.228	0.068	0.0152044	RP11-18H7.1	7479
chr1-94862514-94865775	2.44655e-07	0.382618	0.2	0.06	0.0338774	SLC44A3	0
chr2-29747709-29750414	4.1231e-07	0.382325	0.2	0.056	0.0570926	ALK	0
chr2-127399999-127402585	3.79254e-06	0.382062	0.217	0.07	0.525154	AC068282.3	0
chr19-8525155-8526747	4.10332e-07	0.381882	0.211	0.061	0.0568187	MYO1F	0
chr14-77031127-77034711	0.00358497	0.381786	0.272	0.135	1	IRF2BPL	2427
chr9-115034842-115037432	3.44188e-06	0.381774	0.211	0.067	0.476597	TNC	0
chr3-58214274-58217936	0.00604637	0.381418	0.228	0.112	1	DNASE1L3	0
chr2-96556447-96557519	1.26433e-06	0.380763	0.222	0.071	0.175072	ARID5A	3808
chr18-51613853-51618428	5.54178e-07	0.380131	0.211	0.063	0.0767371	LINC01630	0
chr2-110100922-110102488	2.3698e-06	0.37962	0.206	0.064	0.328146	MALL	0
chr19-10283100-10293910	0.140063	0.379327	0.322	0.208	1	ICAM1	0
chr7-22858241-22861185	1.06687e-05	0.379203	0.2	0.067	1	AC005682.5	0
chr9-94553089-94555682	7.48293e-08	0.379179	0.206	0.058	0.0103616	FBP2	3037
chr11-73185117-73188427	2.76535e-06	0.379063	0.211	0.064	0.382918	RP11-800A3.3	3420
chr11-64867809-64871535	0.000174493	0.378567	0.228	0.093	1	EHD1	0
chr7-29562774-29566517	7.37428e-06	0.37838	0.244	0.087	1	PRR15	0
chr1-224211544-224214635	1.35414e-09	0.378352	0.211	0.055	0.000187508	NVL	12698
chr9-69120118-69123301	0.000350804	0.378279	0.222	0.089	1	TJP2	0
chr14-68945472-68953532	0.000386813	0.377988	0.256	0.104	1	ACTN1	0
chr14-103125698-103133536	6.87325e-06	0.377894	0.261	0.097	0.951739	TNFAIP2	0
chr8-101062738-101065194	1.11706e-07	0.377838	0.233	0.072	0.0154679	FLJ42969	0
chr14-100029329-100032468	3.66754e-06	0.377835	0.206	0.066	0.507844	EVL	0
chr11-94127580-94132709	0.00590106	0.377826	0.328	0.18	1	PANX1	0
chr8-127732488-127740731	0.0194988	0.377802	0.383	0.225	1	MYC	0
chr9-129331919-129337441	9.66453e-05	0.377745	0.233	0.09	1	LINC01503	0
chr3-38028082-38032463	9.57304e-05	0.377651	0.228	0.094	1	PLCD1	0
chr1-207028829-207033564	5.64704e-06	0.377502	0.233	0.085	0.781946	C1orf116	0
chr2-218892155-218898813	0.00364148	0.376986	0.317	0.166	1	WNT10A	0
chr9-72575870-72580639	3.4009e-06	0.376911	0.239	0.085	0.470922	TMC1	0
chr8-48318014-48319916	6.4215e-06	0.376505	0.206	0.066	0.889185	5S_rRNA	1243
chr12-26121658-26126947	0.0014354	0.375913	0.25	0.117	1	BHLHE41	0
chr17-77420287-77424335	2.92893e-07	0.375816	0.206	0.058	0.0405569	SEPT9	0
chr7-2353598-2357716	0.00186832	0.375795	0.294	0.142	1	EIF3B	0
chr1-181042839-181045158	9.52055e-06	0.375218	0.222	0.074	1	MR1	0
chr17-59836967-59849434	0.0553743	0.374589	0.544	0.375	1	VMP1	0
chr21-17688849-17691518	7.21472e-10	0.374388	0.2	0.04	9.99022e-05	AP000432.2	28464
chr7-47785340-47787549	3.31414e-07	0.373932	0.2	0.048	0.0458909	HUS1	0
chr1-161196796-161203163	0.0897179	0.3738	0.311	0.194	1	NDUFS2	0
chr15-43253312-43254589	5.85426e-08	0.373614	0.211	0.056	0.00810639	TGM5	0
chr2-20220334-20226001	1.08114e-05	0.373025	0.244	0.092	1	SDC1	0
chr4-105894295-105898602	1.72423e-05	0.372843	0.222	0.074	1	NPNT	0
chr9-72476666-72478806	2.54458e-08	0.372677	0.228	0.066	0.00352348	TMC1	42994
chr12-6213890-6217320	5.5357e-06	0.372554	0.228	0.08	0.766529	CD9	0
chr1-6488207-6492105	0.000154451	0.372377	0.211	0.084	1	PLEKHG5	0
chr17-66673485-66676978	1.39642e-07	0.37202	0.206	0.063	0.0193362	PRKCA	0
chr5-78699307-78700607	8.25041e-08	0.371905	0.2	0.053	0.0114243	LHFPL2	0
chr17-50949550-50954922	0.000111607	0.371793	0.233	0.099	1	RP11-700H6.2	799
chr19-38263592-38268989	4.63229e-05	0.371724	0.25	0.097	1	SPINT2	0
chr5-32709660-32715303	8.2335e-06	0.371422	0.228	0.08	1	NPR3	0
chr17-59782671-59784630	2.39722e-06	0.371403	0.206	0.068	0.331943	VMP1	0
chr19-45467061-45479515	0.214988	0.371169	0.45	0.331	1	FOSB	0
chr9-33184576-33187963	4.47568e-07	0.371148	0.211	0.066	0.0619748	B4GALT1	17219
chr2-172426959-172431685	2.1379e-05	0.371047	0.211	0.071	1	ITGA6	0
chr1-27007688-27013563	0.00117995	0.371015	0.244	0.115	1	FAM46B	0
chr14-77022097-77029656	0.000736352	0.370432	0.317	0.163	1	IRF2BPL	0
chr7-2629682-2634707	0.0302447	0.370023	0.311	0.182	1	TTYH3	0
chr8-125029736-125032664	1.22327e-07	0.369196	0.228	0.065	0.0169386	KIAA0196	0
chr7-7565748-7570234	0.00105846	0.369016	0.306	0.146	1	MIOS	0
chr21-17511323-17514543	6.13733e-06	0.368943	0.211	0.072	0.849837	CXADR	0
chr5-911585-913328	3.83629e-05	0.368375	0.233	0.086	1	TRIP13	0
chr16-21300237-21303436	0.00498628	0.368338	0.256	0.121	1	CRYM	0
chr5-172903721-172905709	2.20353e-07	0.367037	0.2	0.056	0.0305123	ERGIC1	0
chr16-85610181-85617372	0.0100971	0.366951	0.328	0.17	1	GSE1	0
chr16-50695290-50700545	0.00288668	0.365976	0.356	0.185	1	NOD2	0
chr3-52059163-52063422	0.000517209	0.365913	0.217	0.082	1	DUSP7	2612
chr12-89348933-89355575	0.0198571	0.365872	0.311	0.176	1	DUSP6	0
chr14-31023867-31027606	0.00564515	0.365644	0.3	0.154	1	STRN3	0
chr11-73191888-73195872	2.78105e-06	0.365384	0.222	0.079	0.385091	RP11-800A3.3	10191
chr8-47959411-47962370	0.0199593	0.365276	0.261	0.144	1	MCM4	0
chr22-45975487-45979589	0.00123945	0.364843	0.2	0.075	1	WNT7B	0
chr3-150468493-150470864	3.03959e-08	0.364701	0.2	0.055	0.00420893	TSC22D2	2061
chr3-195913275-195915634	4.68944e-05	0.364633	0.25	0.099	1	RP11-352G9.1	0
chr7-28955630-28959500	2.77002e-06	0.36424	0.211	0.07	0.383564	TRIL	0
chr8-124471592-124477012	0.0564209	0.363949	0.339	0.225	1	RNF139	0
chr2-150484050-150488064	7.64959e-06	0.363942	0.217	0.074	1	RND3	0
chr17-74757427-74761262	2.52638e-06	0.363886	0.206	0.071	0.349827	SLC9A3R1	0
chr5-172799629-172801838	0.000170447	0.363461	0.211	0.083	1	RP11-536N17.1	14782
chr17-75720497-75724324	0.000466707	0.363074	0.206	0.086	1	ITGB4	0
chr15-67105026-67111338	0.000196248	0.362869	0.272	0.126	1	SMAD3	0
chr20-53899190-53901455	0.000330635	0.36283	0.211	0.085	1	BCAS1	35321
chr9-128683184-128686833	0.00112538	0.36274	0.278	0.133	1	SET	0
chr13-73057521-73063681	0.00107736	0.36258	0.289	0.136	1	KLF5	0
chr11-114294653-114298775	2.36165e-06	0.362088	0.222	0.073	0.327018	NNMT	0
chr11-76781155-76786014	3.84841e-06	0.361476	0.217	0.073	0.532889	TSKU	0
chr8-102236552-102240626	0.106316	0.361363	0.339	0.216	1	RRM2B	0
chr2-9178075-9180668	9.71759e-06	0.361062	0.222	0.076	1	ASAP2	26096
chr8-123271892-123275768	0.181646	0.360662	0.317	0.2	1	ZHX1-C8orf76	0
chr2-112876306-112878173	3.41507e-08	0.360579	0.206	0.054	0.00472884	IL37	34797
chr9-21993302-21997332	0.0112216	0.360316	0.278	0.15	1	CDKN2A	0
chr6-35391172-35394490	1.6635e-05	0.360167	0.233	0.082	1	PPARD	0
chr20-23046486-23052027	9.12584e-05	0.359864	0.289	0.117	1	THBD	0
chr11-59171343-59175711	0.000666372	0.359767	0.317	0.149	1	DTX4	0
chr12-54016544-54022233	4.4205e-07	0.359705	0.233	0.078	0.0612107	HOXC6	0
chr1-54541722-54544606	6.13871e-05	0.359705	0.211	0.077	1	ACOT11	0
chr3-138593176-138595325	0.00409365	0.359594	0.239	0.111	1	CEP70	0
chr1-175190633-175196386	0.000429681	0.359314	0.256	0.125	1	KIAA0040	0
chr14-52551227-52554592	0.0728646	0.359268	0.339	0.209	1	GPR137C	0
chr18-63443385-63445599	3.45137e-05	0.358959	0.217	0.074	1	VPS4B	20901
chr8-143571113-143575380	0.000368632	0.358558	0.233	0.094	1	MROH6	0
chr3-184764836-184767159	8.14497e-06	0.358217	0.206	0.072	1	RP11-329B9.1	0
chr7-516724-520925	0.00231844	0.357595	0.233	0.095	1	PDGFA	0
chr8-66427836-66433330	0.07715	0.35751	0.289	0.175	1	ADHFE1	0
chr2-172094408-172099511	0.000124816	0.357259	0.272	0.12	1	DLX2	0
chr2-191244140-191248241	5.2646e-05	0.357226	0.233	0.083	1	MYO1B	0
chr11-33689088-33692621	5.79656e-06	0.3572	0.2	0.057	0.80265	CD59	5639
chr16-69513132-69515901	2.94501e-07	0.357196	0.206	0.054	0.0407796	CYB5B	46865
chr1-183277728-183280549	9.10902e-05	0.356836	0.206	0.072	1	NMNAT2	0
chr7-77796534-77800967	0.0397096	0.356825	0.339	0.2	1	PHTF2	0
chr17-64496039-64508293	0.296234	0.356518	0.456	0.343	1	DDX5	0
chr8-61710455-61715436	0.013637	0.356067	0.272	0.143	1	ASPH	0
chr12-104602595-104606228	0.00395564	0.355878	0.256	0.117	1	CHST11	0
chrX-65642659-65645669	4.38926e-08	0.355774	0.211	0.058	0.00607781	MSN	0
chr6-4280562-4282522	8.34718e-07	0.355699	0.222	0.069	0.115583	RP3-527G5.1	63220
chr8-98943850-98948985	0.00086254	0.355404	0.239	0.114	1	OSR2	0
chr17-45170468-45173570	0.000123824	0.35533	0.2	0.074	1	HEXIM2	427
chr15-60388751-60399288	0.0723534	0.355242	0.428	0.272	1	ANXA2	0
chr7-28853721-28856471	8.84673e-06	0.354488	0.217	0.077	1	CREB5	27826
chr5-149631817-149634431	5.89923e-08	0.354049	0.228	0.068	0.00816867	ARHGEF37	0
chr7-105438795-105440038	6.41855e-07	0.353964	0.206	0.058	0.0888776	PUS7	0
chr11-57321143-57326267	0.00791429	0.353744	0.333	0.185	1	TNKS1BP1	0
chr11-69008133-69011761	3.05836e-06	0.353512	0.217	0.064	0.423492	MRGPRF	0
chr7-55132488-55134262	1.79158e-05	0.353216	0.211	0.073	1	EGFR	0
chr9-93450171-93455161	0.0113424	0.35275	0.289	0.165	1	FAM120AOS	0
chr20-31603892-31609288	0.00329951	0.352741	0.278	0.136	1	ID1	0
chr1-203692336-203694175	6.25286e-06	0.352602	0.2	0.063	0.865834	ATP2B4	0
chr16-3019894-3024788	0.146385	0.352409	0.361	0.238	1	TNFRSF12A	0
chr4-169268806-169272793	3.93598e-05	0.351822	0.222	0.074	1	SH3RF1	0
chr1-156113083-156131066	0.0482849	0.351713	0.589	0.387	1	LMNA	0
chr11-75560686-75566425	0.00730497	0.351112	0.256	0.124	1	SERPINH1	0
chr8-141037636-141044220	6.28616e-06	0.350974	0.261	0.097	0.870444	RP11-128L5.1	11069
chr13-31092688-31095339	6.75484e-06	0.350872	0.211	0.074	0.935343	HSPH1	39634
chr14-50006955-50009520	0.000205936	0.350778	0.206	0.088	1	LINC01588	0
chr14-61560353-61567214	0.0169035	0.350468	0.267	0.153	1	RP11-47I22.4	0
chr21-33428505-33430082	3.17876e-07	0.350075	0.2	0.05	0.0440163	IFNGR2	0
chr18-3622171-3625642	0.00424772	0.349889	0.256	0.125	1	DLGAP1	0
chr9-2013723-2019545	0.0566628	0.349438	0.422	0.279	1	SMARCA2	0
chr9-38062233-38070904	0.00271313	0.34941	0.25	0.118	1	RP11-613M10.9	0
chr15-90209600-90215020	4.8695e-05	0.34929	0.217	0.077	1	SEMA4B	0
chr2-26008418-26009761	1.85649e-05	0.349198	0.228	0.081	1	RAB10	24345
chr12-26317838-26320263	0.000123821	0.34917	0.217	0.09	1	RP11-612B6.1	24
chr2-10407599-10409736	6.9529e-05	0.349107	0.228	0.086	1	HPCAL1	0
chr20-51456203-51458162	3.75778e-07	0.348967	0.2	0.058	0.0520339	NFATC2	0
chr1-161017779-161022963	0.0155701	0.348479	0.3	0.159	1	F11R	0
chr17-49414101-49415678	0.00133758	0.347744	0.25	0.114	1	PHB	0
chr15-68270825-68273618	1.91779e-05	0.347673	0.2	0.067	1	RP11-315D16.4	0
chr14-68546605-68549404	0.00259884	0.347209	0.222	0.098	1	RAD51B	0
chr20-19973856-19979149	8.5337e-05	0.346575	0.211	0.08	1	RIN2	0
chr8-142815482-142816778	9.62094e-07	0.346228	0.2	0.055	0.133221	GML	17468
chr8-141237175-141240987	9.76365e-05	0.345587	0.267	0.121	1	SLC45A4	0
chr19-17931417-17934465	0.000233811	0.345522	0.217	0.091	1	CCDC124	0
chr12-27330847-27336884	0.0101776	0.344801	0.261	0.135	1	ARNTL2	0
chr6-89032574-89038045	0.0127978	0.344607	0.256	0.119	1	PNRC1	42705
chr16-87789443-87791143	1.05317e-06	0.343814	0.2	0.056	0.145832	RP4-536B24.3	0
chr8-22577955-22583140	0.000495811	0.343544	0.239	0.099	1	PDLIM2	0
chr1-212605242-212610046	0.0507895	0.343466	0.311	0.184	1	ATF3	0
chr8-38379583-38387477	0.48102	0.343061	0.422	0.303	1	WHSC1L1	0
chr14-50310781-50313311	0.00750685	0.342643	0.294	0.158	1	L2HGDH	0
chr14-51650706-51653621	0.0278442	0.342628	0.239	0.123	1	FRMD6	0
chr3-11716512-11721329	0.0018283	0.342143	0.244	0.112	1	VGLL4	0
chr1-223704819-223708435	0.000793029	0.342013	0.211	0.086	1	CAPN2	0
chr7-27661744-27664426	0.0148519	0.341667	0.294	0.17	1	HIBADH	0
chr8-100867837-100870369	0.00154657	0.341156	0.222	0.098	1	YWHAZ	46155
chr8-144461600-144468150	0.0385182	0.341134	0.35	0.209	1	CYHR1	0
chr5-176410600-176417351	0.00522684	0.340601	0.283	0.146	1	CLTB	0
chr3-72338120-72339803	0.00129701	0.340295	0.2	0.079	1	RP11-447M4.1	14092
chr17-72419876-72423569	2.1697e-07	0.340017	0.211	0.063	0.0300438	LINC00511	0
chr7-27147188-27151500	7.35894e-05	0.3398	0.211	0.08	1	HOXA6	0
chr7-12685430-12688367	0.0430712	0.339705	0.389	0.238	1	ARL4A	0
chr18-26547208-26550835	5.59747e-05	0.339336	0.206	0.073	1	KCTD1	0
chr12-121796796-121806967	0.0232901	0.338306	0.4	0.24	1	SETD1B	0
chr5-172417983-172421717	0.000219708	0.337197	0.233	0.095	1	SH3PXD2B	0
chr9-21830294-21834089	0.00240669	0.337171	0.244	0.115	1	MTAP	0
chr8-128175184-128177897	0.00128748	0.336726	0.2	0.074	1	AC026248.1	56798
chr9-124867890-124874201	0.0502427	0.336575	0.333	0.198	1	ARPC5L	0
chr19-49148516-49152506	0.00087108	0.336349	0.233	0.103	1	PPFIA3	0
chr5-107668639-107674086	0.000229352	0.336029	0.239	0.103	1	EFNA5	0
chr19-29662267-29669434	0.016937	0.33552	0.294	0.161	1	PLEKHF1	0
chr3-107985405-107990118	0.000901653	0.335399	0.222	0.091	1	CD47	53179
chr9-33034810-33045681	0.121707	0.335378	0.25	0.152	1	DNAJA1	0
chr1-23554276-23562799	0.0465071	0.335323	0.333	0.194	1	ID3	0
chr17-77474929-77478652	3.49772e-05	0.335019	0.206	0.074	1	SEPT9	0
chr4-184811836-184816246	0.0118534	0.334796	0.233	0.118	1	ACSL1	0
chr19-14509506-14519176	0.247961	0.334755	0.344	0.248	1	DNAJB1	0
chr6-42139197-42143435	6.99861e-05	0.334343	0.206	0.071	1	C6orf132	0
chr4-84582088-84584685	8.32638e-05	0.333983	0.222	0.077	1	CDS1	0
chr9-35113766-35117457	0.208861	0.333737	0.35	0.241	1	FAM214B	0
chr8-143218179-143221448	0.000804491	0.333563	0.211	0.082	1	GPIHBP1	1008
chr2-72114755-72116567	2.9815e-06	0.333472	0.2	0.065	0.412848	CYP26B1	12670
chr11-95149465-95154917	0.00733905	0.332847	0.317	0.168	1	SESN3	10595
chr12-569408-572984	4.16484e-05	0.332527	0.239	0.091	1	NINJ2	0
chr17-41578572-41583788	1.33137e-05	0.332183	0.217	0.079	1	KRT14	0
chr2-164839433-164844026	0.000132252	0.332183	0.217	0.079	1	COBLL1	0
chr4-151407495-151410805	3.23479e-05	0.331908	0.211	0.084	1	FAM160A1	0
chr10-86966114-86973349	0.0895939	0.331717	0.272	0.175	1	ADIRF	0
chr14-73751133-73763262	0.143398	0.331409	0.444	0.308	1	ELMSAN1	0
chr1-235917037-235921298	0.00167612	0.33129	0.211	0.091	1	RP5-940F7.2	21254
chr2-64606157-64610073	0.00158794	0.331229	0.3	0.151	1	AC007365.1	0
chr3-45143570-45146752	4.10543e-06	0.330758	0.2	0.057	0.568478	CDCP1	0
chr11-65789451-65794754	2.78244e-05	0.330592	0.2	0.068	1	OVOL1	0
chr15-70194298-70198789	0.00117134	0.330523	0.217	0.095	1	AC011648.1	0
chr7-74451819-74454659	0.00380013	0.330146	0.211	0.089	1	GTF2IRD1	0
chr1-156703437-156713652	0.00428742	0.329795	0.233	0.117	1	CRABP2	0
chr3-126081504-126085018	0.000891215	0.329658	0.206	0.092	1	SLC41A3	0
chr3-79015399-79020100	9.61265e-06	0.328944	0.222	0.084	1	ROBO1	0
chr3-9394745-9400254	0.0592437	0.32885	0.433	0.29	1	SETD5	0
chr20-853872-861296	0.000289762	0.328369	0.239	0.096	1	FAM110A	0
chr12-10720930-10724409	0.00802786	0.328054	0.222	0.11	1	YBX3	0
chr15-60369972-60377167	0.00211867	0.327867	0.222	0.097	1	ANXA2	0
chr9-95505690-95512094	0.0303333	0.327767	0.267	0.151	1	PTCH1	0
chr3-15982477-15983917	2.40346e-05	0.327315	0.2	0.07	1	ANKRD28	122705
chr4-86592758-86597239	4.00662e-05	0.327223	0.228	0.09	1	MAPK10	0
chr14-90443355-90445094	2.68245e-05	0.327054	0.2	0.075	1	RP11-1078H9.1	6968
chr6-31944792-31946825	2.8361e-05	0.326584	0.2	0.067	1	C2	0
chr15-62118365-62120235	1.39732e-05	0.326568	0.206	0.068	1	C2CD4B	43299
chr1-37471059-37482221	0.170279	0.326078	0.483	0.325	1	ZC3H12A	0
chr8-93914415-93918776	0.0694351	0.326002	0.278	0.171	1	PDP1	0
chr8-66664214-66669698	0.0275391	0.325797	0.389	0.26	1	VCPIP1	0
chr1-19643012-19649080	0.00125498	0.325473	0.25	0.116	1	NBL1	0
chr14-105472628-105477941	0.00491212	0.324782	0.233	0.109	1	CRIP2	0
chr2-109611551-109616346	0.000401572	0.323625	0.272	0.111	1	SEPT10	0
chr20-63552458-63555606	0.00654024	0.323348	0.206	0.099	1	FNDC11	0
chr9-121267508-121270399	9.61659e-05	0.323048	0.211	0.075	1	GSN	0
chr2-160219970-160226423	0.00079725	0.322837	0.206	0.082	1	ITGB6	0
chr7-10939208-10941512	0.0168295	0.322722	0.239	0.125	1	NDUFA4	0
chr16-30739577-30742474	0.000625553	0.322578	0.2	0.082	1	TMEM265	0
chr18-79245131-79247050	0.015038	0.32257	0.256	0.142	1	ATP9B	0
chr7-2757197-2761406	0.119167	0.322465	0.344	0.219	1	GNA12	0
chr11-130068373-130072738	0.0267604	0.322231	0.289	0.165	1	APLP2	0
chr17-60676885-60678563	0.0255522	0.321348	0.289	0.158	1	BCAS3	0
chr19-40600711-40606754	0.0940965	0.320744	0.311	0.19	1	LTBP4	0
chr7-66653135-66656441	0.0397879	0.320567	0.244	0.141	1	KCTD7	0
chr21-43810017-43813329	1.01256e-05	0.320503	0.211	0.072	1	RRP1	4723
chr17-41785329-41787461	0.000370675	0.320068	0.2	0.078	1	JUP	0
chr14-75276552-75285117	0.648378	0.319424	0.367	0.28	1	FOS	0
chr7-73849146-73852233	0.00124692	0.319274	0.228	0.096	1	WBSCR27	6610
chr1-183021921-183026857	0.0142982	0.319035	0.206	0.095	1	LAMC1	0
chr7-80917056-80920554	0.000196034	0.318461	0.2	0.068	1	SEMA3C	0
chr7-26863410-26865500	0.0221565	0.318075	0.244	0.117	1	SKAP2	0
chr7-16419935-16422450	0.00260502	0.317548	0.217	0.096	1	ISPD	0
chr9-35813428-35816030	0.107426	0.316929	0.267	0.164	1	HINT2	0
chr9-127915244-127919965	0.0913543	0.316763	0.244	0.139	1	ST6GALNAC4	0
chr14-61523774-61529410	0.0733932	0.315596	0.3	0.169	1	RP11-47I22.4	0
chr14-73025596-73027974	0.0044571	0.315463	0.278	0.142	1	ZFYVE1	0
chr14-100371287-100378278	0.383005	0.315267	0.283	0.198	1	WARS	0
chr6-3207718-3210306	0.00488586	0.315076	0.206	0.098	1	RP1-40E16.9	11961
chr5-14142399-14146345	0.0053563	0.314875	0.233	0.106	1	TRIO	0
chr6-31817396-31824207	0.272161	0.314481	0.306	0.203	1	HSPA1A	0
chr11-62537347-62550144	0.26477	0.314369	0.411	0.292	1	AHNAK	0
chr17-81046916-81052263	0.00312201	0.314075	0.2	0.078	1	BAIAP2	0
chr3-194571679-194576117	0.00751534	0.313581	0.222	0.095	1	TMEM44	11555
chr20-6005575-6009095	0.000400253	0.312921	0.211	0.083	1	CRLS1	0
chr3-194321632-194324827	0.000224719	0.312697	0.211	0.09	1	LINC00887	8828
chr3-5121899-5126975	0.0278658	0.312591	0.222	0.121	1	ARL8B	0
chr14-50319203-50321792	0.00728873	0.312447	0.25	0.124	1	ATP5S	0
chr12-6763563-6769345	0.0496761	0.31205	0.272	0.152	1	PTMS	0
chr14-23055828-23058676	0.0109838	0.311729	0.222	0.107	1	CDH24	0
chr1-114668820-114672204	0.0165585	0.311447	0.244	0.123	1	DENND2C	0
chr9-99818646-99825899	0.400861	0.311311	0.444	0.339	1	NR4A3	0
chr7-5554452-5559549	0.0529288	0.311197	0.311	0.164	1	ACTB	0
chr5-113487304-113490054	0.0001009	0.311192	0.206	0.074	1	MCC	0
chr1-93691226-93696119	0.010359	0.310797	0.239	0.115	1	BCAR3	0
chr7-23011600-23014644	0.0527051	0.310417	0.278	0.178	1	FAM126A	0
chr20-10670060-10675444	0.291657	0.310215	0.25	0.154	1	JAG1	0
chr19-16568673-16573432	0.0138471	0.309897	0.233	0.125	1	SLC35E1	0
chr6-35725356-35733433	0.241815	0.30981	0.311	0.202	1	FKBP5	0
chr15-75693532-75698244	0.000240742	0.309186	0.2	0.074	1	CSPG4	0
chr12-114681267-114685331	0.00685013	0.308973	0.206	0.09	1	TBX3	0
chr2-113077411-113080637	3.99844e-05	0.308746	0.2	0.076	1	IL1F10	1560
chr16-67393193-67398293	0.000319316	0.308685	0.2	0.074	1	ZDHHC1	0
chr13-99494528-99497350	0.00494956	0.308597	0.239	0.112	1	LINC01232	0
chr9-33157907-33169500	0.964598	0.308536	0.439	0.353	1	B4GALT1	0
chr13-36343777-36347273	0.000480234	0.308369	0.211	0.087	1	SPG20	0
chr4-74444577-74447114	0.000864666	0.308247	0.2	0.085	1	AREG	0
chr9-682898-687020	0.000611318	0.307756	0.2	0.083	1	KANK1	0
chr16-84500965-84505482	0.0379336	0.307616	0.294	0.162	1	TLDC1	0
chr20-40686389-40691006	0.0288562	0.307227	0.244	0.12	1	MAFB	0
chr14-105015835-105022151	0.0295359	0.306933	0.272	0.149	1	CDCA4	0
chr8-102410101-102413458	0.000982682	0.306874	0.294	0.143	1	UBR5	0
chr21-36428686-36431634	0.00720189	0.306858	0.233	0.112	1	CHAF1B	9670
chr10-119678193-119682938	0.000795396	0.306639	0.2	0.08	1	BAG3	373
chr3-19945333-19948569	0.0100927	0.305684	0.278	0.147	1	RAB5A	0
chr6-56953203-56956276	0.000311495	0.305579	0.206	0.078	1	DST	0
chr7-16753183-16756667	0.00287894	0.305488	0.228	0.096	1	TSPAN13	0
chr22-50298634-50309817	0.185431	0.305217	0.267	0.157	1	PLXNB2	0
chr9-104925130-104928736	0.023783	0.305151	0.217	0.102	1	ABCA1	0
chr5-6631421-6638739	0.0912442	0.305151	0.283	0.189	1	SRD5A1	0
chr5-132494029-132501620	0.0445455	0.305119	0.367	0.231	1	IRF1	3230
chr1-39102288-39108965	0.139115	0.304478	0.272	0.155	1	MACF1	0
chr17-45314090-45321528	0.180409	0.304246	0.361	0.244	1	MAP3K14	0
chr2-218288756-218295726	0.0120128	0.304046	0.256	0.131	1	TMBIM1	0
chr11-65180435-65184467	0.00185476	0.303811	0.217	0.098	1	CAPN1	0
chr7-101084666-101087757	0.00398173	0.302617	0.228	0.106	1	TRIM56	0
chr12-79688714-79693542	0.00922861	0.302306	0.222	0.103	1	PAWR	0
chr8-102653488-102659140	0.690632	0.301865	0.356	0.259	1	KLF10	0
chr4-124710105-124713756	0.00576738	0.301574	0.211	0.096	1	ANKRD50	0
chr1-205315964-205322277	0.0393544	0.301509	0.239	0.129	1	NUAK2	0
chr1-12615050-12620840	0.0382312	0.301159	0.25	0.136	1	DHRS3	0
chr9-133132975-133136143	0.202261	0.300645	0.244	0.157	1	RALGDS	0
chr16-3149462-3153226	0.0311743	0.300515	0.217	0.109	1	RP11-473M20.16	3509
chr19-13162337-13165609	0.0250597	0.300336	0.228	0.122	1	IER2	7428
chr6-44245083-44260808	0.762832	0.300236	0.45	0.351	1	HSP90AB1	0
chr1-203662743-203664348	6.22088e-05	0.300102	0.206	0.076	1	ATP2B4	0
chr9-137239998-137246057	0.15351	0.299139	0.317	0.204	1	FAM166A	0
chr20-37177910-37180712	0.0552057	0.298727	0.267	0.147	1	MROH8	0
chr6-31493680-31499088	0.0441773	0.297232	0.278	0.16	1	MICB	0
chr9-21801592-21804376	0.00892144	0.297077	0.233	0.118	1	MTAP	0
chr12-95213863-95219283	0.576272	0.296822	0.3	0.229	1	VEZT	0
chr7-6373057-6378696	0.0325637	0.296623	0.272	0.154	1	RAC1	0
chr2-9777879-9782977	0.00349424	0.295155	0.2	0.091	1	RP11-521D12.5	7537
chr1-94539306-94543387	0.00109249	0.295067	0.2	0.087	1	F3	0
chr9-113577501-113583221	0.047206	0.294946	0.261	0.145	1	RGS3	0
chr8-85461616-85465733	0.000512992	0.294596	0.206	0.082	1	CA2	0
chr11-130159324-130164373	0.00030026	0.294233	0.206	0.078	1	ST14	0
chr17-73309568-73313169	0.0156631	0.294146	0.25	0.13	1	CDC42EP4	0
chr8-11801821-11809274	0.185851	0.29359	0.311	0.203	1	FDFT1	0
chr4-3384242-3389822	0.017506	0.293455	0.25	0.128	1	RGS12	0
chr9-100097854-100100456	0.00662839	0.292944	0.328	0.184	1	ERP44	0
chr9-33442836-33448628	0.0279527	0.292915	0.244	0.128	1	AQP3	0
chr1-9821783-9828268	0.00647506	0.292791	0.272	0.137	1	AL357140.1	0
chr20-34875642-34877449	0.00793264	0.291898	0.244	0.119	1	ACSS2	0
chr19-7868196-7872558	0.189344	0.291691	0.239	0.145	1	PRR36	0
chr7-23297950-23301041	0.00570433	0.291185	0.222	0.106	1	MALSU1	0
chr3-100708495-100711203	0.0277373	0.290999	0.233	0.132	1	TFG	0
chr14-73236949-73243010	0.0108691	0.290724	0.228	0.106	1	PAPLN	0
chr3-172707045-172711815	0.118231	0.290706	0.244	0.141	1	NCEH1	0
chr7-23104623-23107791	0.00220069	0.290525	0.25	0.122	1	KLHL7	0
chr12-6276942-6280718	0.00990825	0.290007	0.217	0.106	1	PLEKHG6	29717
chr11-107856375-107860222	0.00600378	0.289789	0.228	0.11	1	SLC35F2	0
chr12-6960575-6965691	0.0415315	0.289663	0.278	0.16	1	PHB2	0
chr12-107091105-107094614	0.0537078	0.289631	0.294	0.173	1	CRY1	0
chr15-59368911-59373451	0.0241576	0.289409	0.211	0.102	1	MYO1E	0
chr14-52694413-52697434	0.133173	0.289362	0.211	0.121	1	ERO1A	0
chr7-100538284-100540405	0.00460922	0.288988	0.322	0.169	1	AGFG2	0
chr15-75198598-75205259	0.119049	0.288524	0.278	0.179	1	C15orf39	0
chr9-5625923-5633772	0.300642	0.2881	0.283	0.189	1	RIC1	0
chr7-93231239-93233053	0.00533801	0.288069	0.261	0.135	1	VPS50	0
chr14-75659953-75662085	0.101608	0.287961	0.25	0.151	1	TTLL5	0
chr14-52729494-52731303	0.0224096	0.287814	0.239	0.128	1	STYX	0
chr9-37463794-37469008	0.0511037	0.287267	0.389	0.241	1	ZBTB5	0
chr2-71226218-71227928	0.00968111	0.287123	0.222	0.115	1	PAIP2B	0
chr14-103071551-103076254	0.00717264	0.287112	0.211	0.099	1	RP11-736N17.11	7955
chr20-53591556-53596995	0.00729967	0.287038	0.25	0.129	1	ZNF217	0
chr12-124635931-124638091	0.000470867	0.286855	0.2	0.083	1	NCOR2	68341
chr17-81033448-81039180	0.0148767	0.286716	0.206	0.109	1	BAIAP2	0
chr16-57797483-57803426	0.0218909	0.286299	0.206	0.103	1	KIFC3	0
chr2-231611171-231615675	0.0529954	0.286135	0.306	0.179	1	C2orf57	16887
chr14-50529646-50533758	0.00916215	0.285821	0.239	0.123	1	MAP4K5	0
chr1-24742088-24747023	0.0978057	0.28577	0.294	0.177	1	CLIC4	0
chr16-4368755-4376523	0.0378074	0.285542	0.211	0.106	1	VASN	0
chr8-94893340-94897173	0.203866	0.285513	0.244	0.153	1	CCNE2	0
chr12-132759853-132762895	0.119516	0.285349	0.272	0.165	1	ANKLE2	0
chr8-66532958-66536570	0.0191547	0.284765	0.222	0.121	1	C8orf46	14433
chr11-119100199-119103380	0.0714896	0.28444	0.239	0.138	1	DPAGT1	0
chr9-136481232-136485593	0.18422	0.284361	0.294	0.19	1	SEC16A	0
chr11-65491074-65494984	0.01841	0.283798	0.25	0.123	1	MALAT1	2777
chr9-93111367-93122066	0.086178	0.28366	0.256	0.144	1	CARD19	0
chr2-207332436-207335779	0.00577164	0.28358	0.228	0.106	1	AC007879.6	61745
chr14-66506698-66510275	0.044889	0.283448	0.289	0.164	1	GPHN	0
chr8-47731335-47739360	0.020235	0.283237	0.289	0.162	1	SPIDR	0
chr3-172748970-172751935	0.083177	0.283012	0.239	0.146	1	ECT2	0
chr9-92668160-92671918	0.079745	0.282716	0.256	0.148	1	IPPK	0
chr11-111926350-111927822	0.0490309	0.282172	0.222	0.119	1	HSPB2-C11orf52	0
chr14-104752174-104754580	0.0435316	0.281201	0.289	0.168	1	SIVA1	0
chr14-39265774-39270362	0.0147899	0.28087	0.244	0.121	1	CTAGE5	0
chr1-44028340-44032982	0.0360954	0.280281	0.239	0.129	1	SLC6A9	0
chr8-143970042-143979152	0.632822	0.28018	0.239	0.174	1	PLEC	0
chr1-58926210-58930454	0.000964117	0.280155	0.2	0.078	1	LINC01358	3188
chr7-87151375-87153821	0.0416681	0.280155	0.25	0.14	1	DMTF1	0
chr2-9752226-9755448	0.071616	0.280155	0.239	0.14	1	RP11-521D12.5	2047
chr2-62704735-62707504	0.115409	0.279444	0.272	0.167	1	EHBP1	0
chr6-30100462-30103896	0.0319714	0.279133	0.239	0.125	1	TRIM31	0
chr2-64748646-64752769	0.347808	0.279039	0.361	0.252	1	SERTAD2	0
chr14-24145332-24148513	0.0212884	0.278782	0.361	0.216	1	PSME2	0
chr22-40635241-40639066	0.113334	0.27854	0.278	0.178	1	MKL1	0
chr8-78803733-78807127	0.00493602	0.278519	0.228	0.107	1	IL7	0
chr7-106109875-106113074	0.127912	0.278485	0.211	0.122	1	SYPL1	0
chr4-26856849-26862905	0.35527	0.2784	0.344	0.238	1	STIM2	0
chr13-110711644-110717975	0.853754	0.278369	0.467	0.368	1	ING1	0
chr2-54722490-54725318	0.0962517	0.278301	0.261	0.162	1	EML6	0
chr15-92803540-92804771	0.00395343	0.278281	0.211	0.099	1	FAM174B	0
chr5-138751440-138756128	0.0102611	0.277935	0.206	0.093	1	CTNNA1	0
chr4-10018519-10024777	0.02102	0.277728	0.261	0.139	1	SLC2A9	0
chr15-70491057-70496146	0.00115988	0.277441	0.256	0.121	1	RP11-96C21.1	7760
chr20-62922375-62927170	0.076706	0.277335	0.211	0.121	1	DIDO1	0
chr9-113150487-113156837	0.258963	0.277174	0.261	0.168	1	SLC31A2	0
chrX-154368129-154374838	0.022592	0.276927	0.328	0.197	1	FLNA	0
chr4-88591360-88594142	0.0625312	0.276683	0.239	0.142	1	HERC3	0
chr6-3748041-3752706	0.0565634	0.276639	0.228	0.123	1	PXDC1	0
chr1-161082439-161089857	0.0270863	0.275616	0.222	0.119	1	NECTIN4	0
chr16-53098416-53100700	0.0230394	0.274808	0.244	0.117	1	CHD9	0
chr9-109010231-109014981	0.0174666	0.274473	0.289	0.16	1	CTNNAL1	0
chr1-156281128-156286430	0.123912	0.274138	0.25	0.154	1	TMEM79	0
chr8-95132847-95136334	0.11136	0.274119	0.222	0.12	1	PLEKHF2	0
chr7-815264-818763	0.00959886	0.273974	0.206	0.101	1	SUN1	0
chr9-125745580-125749787	0.102548	0.273969	0.244	0.152	1	PBX3	0
chr1-151539250-151542095	0.000879342	0.273496	0.222	0.098	1	TUFT1	0
chr7-98280529-98288838	0.190886	0.273402	0.322	0.207	1	BRI3	0
chr3-48086820-48089677	0.0393006	0.273311	0.289	0.173	1	MAP4	0
chr9-32522819-32526909	0.0647963	0.27311	0.233	0.126	1	DDX58	0
chr8-144102631-144105678	0.213711	0.272935	0.283	0.172	1	SHARPIN	0
chr5-172731222-172734352	0.00482532	0.272823	0.206	0.087	1	DUSP1	33737
chr1-23366323-23371270	0.292098	0.272667	0.311	0.206	1	ZNF436	0
chr8-95112546-95116600	0.0395535	0.272405	0.2	0.104	1	NDUFAF6	0
chr6-42448944-42454872	0.0522291	0.272184	0.222	0.114	1	TRERF1	0
chr19-40714390-40721131	0.513062	0.272182	0.35	0.237	1	COQ8B	0
chr8-89900754-89904939	0.0174803	0.272008	0.261	0.145	1	OSGIN2	0
chrX-53421234-53423389	0.00153857	0.270951	0.217	0.099	1	SMC1A	0
chr11-76206099-76211163	0.0648478	0.270518	0.2	0.107	1	WNT11	0
chr8-95268185-95270638	0.0545487	0.270153	0.222	0.127	1	C8orf37	0
chr18-76490517-76497289	0.0864457	0.269376	0.239	0.135	1	ZNF516	0
chr8-54020497-54023902	0.0318791	0.269374	0.233	0.119	1	TCEA1	0
chr3-138831828-138835611	0.0110663	0.269274	0.217	0.113	1	PIK3CB	0
chr1-205629747-205633829	0.206466	0.269089	0.233	0.136	1	ELK4	0
chr3-12946159-12950108	0.00695307	0.268953	0.2	0.085	1	IQSEC1	0
chr12-53378883-53383780	0.487766	0.268839	0.406	0.295	1	SP1	0
chr14-73739779-73747727	0.0390044	0.268777	0.25	0.14	1	ELMSAN1	0
chr8-124537730-124541187	0.0236019	0.268744	0.228	0.116	1	TATDN1	0
chr9-98055834-98058939	0.093912	0.26817	0.239	0.141	1	NANS	0
chr1-38025316-38031117	0.00633037	0.268105	0.222	0.112	1	UTP11	491
chr3-171808900-171812408	0.111913	0.267763	0.206	0.117	1	PLD1	0
chr1-113388530-113392547	0.00661435	0.267709	0.233	0.123	1	MAGI3	0
chr9-15421604-15424121	0.0302123	0.267355	0.25	0.137	1	SNAPC3	0
chr7-6080148-6082021	0.0423435	0.267122	0.217	0.116	1	AC004895.4	0
chr14-20460434-20462411	0.118185	0.265758	0.278	0.18	1	TMEM55B	0
chr7-22561295-22567003	0.137701	0.265655	0.206	0.115	1	STEAP1B	0
chr3-101675432-101678723	0.215396	0.265524	0.311	0.204	1	ZBTB11	0
chr14-95533247-95536383	0.119775	0.265379	0.272	0.175	1	GLRX5	0
chr10-73885967-73889848	0.041131	0.265287	0.217	0.111	1	CAMK2G	11375
chr7-1136710-1138975	0.0285346	0.264957	0.2	0.097	1	C7orf50	0
chr21-31353915-31355593	0.0106765	0.264839	0.228	0.112	1	TIAM1	0
chr3-12662095-12664939	0.0487861	0.264812	0.267	0.141	1	RAF1	0
chr14-60091067-60093568	0.143377	0.264796	0.256	0.145	1	PCNX4	0
chr9-6756550-6759931	0.27317	0.264792	0.294	0.197	1	KDM4C	0
chr8-11860104-11869848	0.591611	0.264674	0.25	0.174	1	CTSB	0
chr4-139175604-139179090	0.621834	0.264606	0.256	0.163	1	ELF2	0
chr15-40843518-40847910	0.0512098	0.264211	0.206	0.099	1	SPINT1	0
chr2-218395509-218402121	0.889183	0.264124	0.25	0.199	1	CTDSP1	0
chr6-18152591-18156637	0.348278	0.263918	0.289	0.205	1	KDM1B	0
chr8-126555526-126559320	0.0489664	0.263209	0.217	0.114	1	FAM84B	0
chr1-150558471-150580530	0.134871	0.262701	0.522	0.474	1	MCL1	0
chr7-92588420-92590886	0.0079554	0.262473	0.233	0.123	1	FAM133B	0
chr4-173331980-173335887	0.48328	0.262344	0.289	0.214	1	HMGB2	0
chr11-90218592-90223971	0.101191	0.262199	0.233	0.132	1	CHORDC1	0
chr14-69715834-69717482	0.00528243	0.262108	0.206	0.092	1	SUSD6	691
chr20-17568355-17571542	0.00626931	0.262028	0.233	0.119	1	DSTN	0
chr7-72827558-72830707	0.177752	0.261602	0.3	0.203	1	TYW1B	0
chr2-61014605-61018776	0.0205959	0.261328	0.233	0.126	1	PEX13	0
chr19-43667715-43670932	0.944312	0.261228	0.25	0.18	1	PLAUR	0
chr3-194485102-194490516	0.0928531	0.261046	0.289	0.167	1	ATP13A3	0
chr4-56465408-56468783	0.0449746	0.260867	0.233	0.132	1	SRP72	0
chr3-170221726-170223938	0.0310127	0.260653	0.211	0.11	1	PRKCI	0
chr8-143595697-143599343	0.279465	0.260198	0.239	0.142	1	EEF1D	0
chr9-131727100-131729936	0.0952083	0.260193	0.228	0.131	1	RAPGEF1	0
chr14-35291592-35294855	0.13238	0.259998	0.267	0.165	1	PSMA6	0
chr15-89997985-90006121	0.18504	0.259983	0.239	0.138	1	ZNF710	0
chr11-118618183-118623990	0.0975861	0.259956	0.206	0.109	1	PHLDB1	0
chr17-81505246-81515817	0.73466	0.259812	0.261	0.179	1	ACTG1	0
chr17-48023195-48027174	0.137063	0.2598	0.267	0.174	1	COPZ2	0
chr4-73255811-73260356	0.240594	0.259776	0.244	0.159	1	ANKRD17	0
chr20-37524561-37529507	0.0563753	0.25951	0.233	0.128	1	BLCAP	0
chr9-111481720-111484973	0.0394078	0.259503	0.211	0.123	1	KIAA0368	0
chr14-35120639-35124039	0.0903024	0.259377	0.289	0.172	1	KIAA0391	0
chr7-4681418-4684987	0.0200093	0.259291	0.244	0.131	1	FOXK1	0
chr6-33320192-33324379	0.209544	0.258965	0.278	0.175	1	DAXX	0
chr7-100887348-100892036	0.0171806	0.258834	0.25	0.124	1	SRRT	0
chr14-55578499-55584520	0.0835595	0.258817	0.211	0.124	1	KTN1	0
chr22-27918240-27920798	0.0380081	0.258512	0.2	0.103	1	PITPNB	0
chr13-98567829-98572809	0.00833204	0.258475	0.2	0.093	1	STK24	0
chr11-65496431-65511284	0.906646	0.257975	0.461	0.345	1	AP000769.1	0
chr3-108130566-108134876	0.000325607	0.257931	0.2	0.078	1	LINC01215	0
chr17-50423650-50430247	0.0522819	0.257921	0.217	0.123	1	ACSF2	0
chr12-6334987-6342697	0.16885	0.257752	0.344	0.214	1	TNFRSF1A	0
chr22-37559890-37565485	0.0136683	0.257298	0.2	0.095	1	CDC42EP1	0
chr15-50883480-50886320	0.0883131	0.257145	0.206	0.111	1	CTD-2378E12.1	0
chr9-99220944-99223475	0.0670983	0.257086	0.239	0.142	1	ALG2	0
chr1-235502556-235505871	0.251805	0.257055	0.25	0.167	1	B3GALNT2	0
chr15-67252954-67255370	0.0856412	0.256989	0.217	0.12	1	IQCH	0
chr9-4661213-4666963	0.260022	0.256503	0.211	0.12	1	SPATA6L	0
chr11-125886619-125888713	0.0522185	0.256273	0.222	0.119	1	HYLS1	0
chr7-7181415-7184430	0.583212	0.256203	0.272	0.193	1	C1GALT1	0
chr19-38682738-38684927	0.0295246	0.255745	0.217	0.112	1	ACTN4	0
chr1-155192074-155196470	0.265774	0.255635	0.228	0.15	1	MUC1	0
chr5-177493909-177498584	0.133123	0.255585	0.278	0.163	1	PDLIM7	0
chr16-2968204-2971170	0.052824	0.25553	0.206	0.114	1	PAQR4	0
chr9-14320093-14323522	0.00132233	0.25508	0.2	0.089	1	NFIB	0
chr2-43157521-43160556	0.193758	0.254956	0.272	0.169	1	AC093609.1	54829
chr14-100320156-100335615	0.0889232	0.254868	0.2	0.116	1	WARS	0
chr6-31348610-31358796	0.130294	0.25452	0.333	0.215	1	HLA-B	0
chr1-248837278-248839809	0.0580005	0.254517	0.283	0.165	1	ZNF672	0
chr9-127926781-127932001	0.148751	0.254479	0.206	0.122	1	PIP5KL1	0
chr9-121071399-121076040	0.371539	0.254477	0.244	0.162	1	CNTRL	0
chr16-75107715-75112614	0.483151	0.254333	0.211	0.149	1	ZNRF1	0
chr12-38903457-38907599	0.148617	0.254228	0.217	0.118	1	CPNE8	0
chr13-99198597-99202545	0.0217899	0.25388	0.217	0.114	1	UBAC2	0
chr20-41002876-41006172	0.239554	0.253746	0.2	0.121	1	TOP1	22645
chr16-56987210-56992501	0.0920891	0.253665	0.222	0.134	1	NLRC5	0
chr3-123582259-123587415	0.160854	0.253603	0.272	0.182	1	HACD2	0
chr17-75875380-75879590	0.0586636	0.252884	0.217	0.122	1	TRIM47	0
chr12-47900203-47905910	0.250807	0.252779	0.289	0.174	1	VDR	0
chr1-67682485-67687318	0.233707	0.252762	0.35	0.229	1	GADD45A	0
chr18-62714543-62718279	0.868533	0.252754	0.239	0.179	1	PHLPP1	0
chr3-113741025-113748124	0.312417	0.252236	0.367	0.247	1	NAA50	0
chr15-66386051-66391194	0.0708254	0.252194	0.261	0.154	1	MAP2K1	0
chr17-60390028-60394307	0.104746	0.251949	0.244	0.149	1	USP32	0
chr7-4744015-4747026	0.16855	0.25177	0.222	0.14	1	FOXK1	0
chr9-136884435-136887769	0.0684911	0.251672	0.25	0.15	1	TRAF2	0
chr1-41660779-41667798	0.206051	0.250733	0.222	0.143	1	HIVEP3	0
chr17-78349488-78361393	0.804046	0.250622	0.406	0.312	1	SOCS3	0
chr20-33992343-33996224	0.41764	0.25049	0.35	0.236	1	RALY	0
chr7-77536253-77539155	0.058374	0.250434	0.267	0.154	1	PTPN12	0
chr3-105865876-105870197	0.0580415	0.250343	0.294	0.18	1	CBLB	0
chr17-78313615-78318162	0.0648614	0.250153	0.228	0.118	1	AC061992.2	0
chr1-146035223-146040189	0.424545	0.250075	0.217	0.141	1	HFE2	0
chr6-137866051-137885785	1.24535e-07	-0.272945	0.3	0.377	0.0172443	TNFAIP3	0
chr12-4268353-4275914	1.03602e-07	-0.301218	0.1	0.21	0.0143457	CCND2	0
chr17-40316271-40328104	8.66368e-08	-0.319635	0.194	0.273	0.0119966	RARA	0
chr10-17226900-17235825	9.35714e-11	-0.385229	0.117	0.238	1.29568e-05	VIM	0
chr5-100899872-100905687	1.14803e-10	-0.42681	0.067	0.205	1.58968e-05	ST8SIA4	0
chr17-58327653-58340507	4.04367e-16	-0.565749	0.083	0.261	5.59928e-11	TSPOAP1	0

## Sheet: NKT
	p_val	avg_log2FC	pct.1	pct.2	p_val_adj	gene	distance
chr7-142806222-142810213	5.77973e-219	0.723309	0.28	0.016	8.00319e-214	PRSS2	31657
chr12-120011550-120015800	4.52461e-166	0.662254	0.293	0.043	6.26523e-161	BICDL1	0
chr14-22554594-22562679	3.73533e-134	0.622869	0.316	0.088	5.17232e-129	AE000662.92	0
chr3-114213187-114216524	8.41888e-158	0.62054	0.254	0.03	1.16576e-152	DRD3	13779
chr20-38872034-38876434	1.89198e-154	0.590837	0.244	0.025	2.61982e-149	PPP1R16B	0
chr6-42770609-42772341	1.89937e-156	0.558545	0.206	0.01	2.63005e-151	GLTSCR1L	0
chr17-58327653-58340507	1.59772e-118	0.548215	0.406	0.165	2.21237e-113	TSPOAP1	0
chr10-11162741-11171970	8.35747e-134	0.542359	0.298	0.084	1.15726e-128	CELF2	0
chr6-107819144-107825197	2.07878e-105	0.538879	0.243	0.052	2.87849e-100	SCML4	0
chr2-157437474-157445049	2.89815e-123	0.530418	0.251	0.056	4.01307e-118	CYTIP	0
chr14-99229574-99237606	6.01762e-135	0.521276	0.216	0.025	8.3326e-130	BCL11B	0
chr2-136129317-136134546	1.04748e-119	0.508411	0.231	0.046	1.45045e-114	CXCR4	11151
chr21-33947029-33950612	5.80443e-103	0.506	0.265	0.081	8.03739e-98	AP000304.12	15421
chr12-4268353-4275914	3.6779e-94	0.504869	0.328	0.133	5.09279e-89	CCND2	0
chr14-51846454-51849630	2.20906e-117	0.494047	0.246	0.054	3.05889e-112	GNG2	0
chr18-63157305-63163139	3.09737e-99	0.484915	0.277	0.091	4.28892e-94	BCL2	0
chr16-30182208-30187733	1.4215e-96	0.479511	0.258	0.078	1.96836e-91	CORO1A	0
chr1-198678034-198682760	1.43611e-113	0.474797	0.206	0.031	1.98859e-108	PTPRC	0
chr10-69087308-69091284	6.46585e-107	0.465368	0.233	0.056	8.95327e-102	SRGN	0
chr7-130929928-130945902	7.63063e-76	0.464975	0.308	0.147	1.05661e-70	RP11-138A9.2	0
chr16-27400520-27409165	2.2263e-92	0.4613	0.27	0.096	3.08275e-87	IL21R	0
chr16-81519079-81525093	2.52435e-79	0.453596	0.247	0.089	3.49547e-74	CMIP	0
chr14-91226482-91232976	4.62742e-98	0.451495	0.225	0.058	6.40759e-93	GPR68	0
chr4-40196587-40202838	1.1831e-102	0.449064	0.223	0.059	1.63824e-97	RHOH	0
chr22-41939754-41941897	9.69056e-88	0.447416	0.223	0.057	1.34185e-82	CENPM	0
chr6-136287843-136291179	6.83143e-81	0.446194	0.331	0.161	9.45949e-76	BCLAF1	0
chr14-89616432-89622484	2.04765e-93	0.442373	0.242	0.073	2.83538e-88	FOXN3	0
chr8-133065995-133076822	5.2211e-85	0.43987	0.277	0.11	7.22965e-80	SLA	0
chr14-100064684-100070761	1.27218e-77	0.437801	0.26	0.097	1.76158e-72	EVL	0
chr8-133053022-133061242	2.64356e-86	0.434705	0.223	0.064	3.66053e-81	SLA	0
chr20-32534400-32540647	2.16819e-82	0.430991	0.206	0.054	3.00229e-77	NOL4L	0
chr19-18288984-18295226	3.15319e-88	0.429746	0.266	0.104	4.36622e-83	JUND	7361
chr2-234288828-234293221	7.13157e-84	0.42813	0.234	0.076	9.87508e-79	RP11-309M7.1	64313
chr8-11455775-11458769	2.98077e-91	0.42523	0.207	0.048	4.12747e-86	FAM167A	0
chr21-35044722-35052001	8.62747e-79	0.423686	0.316	0.15	1.19465e-73	RUNX1	0
chr10-11175575-11180885	7.29136e-88	0.42306	0.229	0.066	1.00963e-82	CELF2	0
chr5-100899872-100905687	2.86718e-84	0.421291	0.31	0.134	3.97019e-79	ST8SIA4	0
chr10-124717846-124719939	8.57387e-88	0.419774	0.213	0.056	1.18722e-82	RP11-12J10.3	0
chr11-67482457-67488484	3.67117e-75	0.418395	0.234	0.084	5.08347e-70	AIP	0
chr12-57473714-57480726	1.33702e-78	0.414502	0.219	0.07	1.85137e-73	ARHGAP9	0
chr6-149480661-149485906	1.01299e-80	0.413002	0.225	0.074	1.40269e-75	ZC3H12D	0
chr1-40383478-40390694	1.4794e-84	0.409854	0.221	0.066	2.04853e-79	SMAP2	0
chr10-62045337-62051610	1.0731e-79	0.408687	0.293	0.124	1.48592e-74	ARID5B	0
chr9-114381884-114391388	6.41392e-62	0.400006	0.31	0.163	8.88135e-57	AKNA	0
chr10-74824001-74827662	1.45991e-65	0.399591	0.31	0.152	2.02154e-60	KAT6B	0
chr7-131102432-131111678	7.99186e-71	0.39782	0.324	0.167	1.10663e-65	MKLN1	0
chr6-158867713-158870763	1.16355e-69	0.394871	0.279	0.118	1.61117e-64	C6orf99	0
chr9-129883906-129891273	2.64615e-65	0.391316	0.397	0.235	3.66412e-60	FNBP1	0
chr8-30080985-30084079	7.34642e-73	0.389979	0.274	0.115	1.01726e-67	SARAF	0
chr1-192575171-192582077	8.89601e-82	0.388319	0.25	0.092	1.23183e-76	RGS1	0
chr5-170273584-170280544	3.08051e-79	0.387438	0.221	0.069	4.26558e-74	LCP2	0
chr8-29345474-29354267	2.17888e-72	0.384876	0.27	0.118	3.0171e-67	DUSP4	0
chr10-17226900-17235825	1.84003e-72	0.383683	0.332	0.175	2.54789e-67	VIM	0
chr10-31317991-31323115	2.54486e-65	0.377114	0.217	0.08	3.52387e-60	ZEB1	0
chr19-5902881-5905473	6.70754e-65	0.375422	0.341	0.186	9.28794e-60	NDUFA11	0
chr7-151349098-151352712	2.42166e-66	0.368112	0.25	0.103	3.35328e-61	NUB1	0
chr15-64891427-64897994	2.06961e-82	0.367272	0.287	0.128	2.86579e-77	AC069368.3	0
chr19-38848262-38853207	1.71574e-67	0.366278	0.385	0.227	2.37579e-62	HNRNPL	0
chr2-234488140-234497846	7.29025e-64	0.364674	0.255	0.118	1.00948e-58	ARL4C	0
chr10-8053140-8058106	4.58401e-67	0.362898	0.22	0.081	6.34748e-62	GATA3	0
chr7-155296548-155300067	2.20933e-57	0.361118	0.305	0.165	3.05925e-52	INSIG1	0
chr1-21292536-21295467	4.35465e-69	0.360734	0.234	0.083	6.02988e-64	ECE1	0
chr6-106518943-106522998	6.11047e-66	0.359009	0.226	0.088	8.46117e-61	AIM1	0
chr18-13610498-13617185	5.5636e-67	0.358641	0.225	0.093	7.70391e-62	LDLRAD4	0
chr17-40559496-40566137	6.57882e-72	0.357638	0.2	0.066	9.10969e-67	CCR7	0
chr3-14431096-14435824	4.79037e-59	0.355844	0.26	0.119	6.63322e-54	SLC6A6	0
chr17-42386796-42390057	1.13127e-61	0.355456	0.266	0.126	1.56648e-56	STAT3	0
chr13-74131902-74136925	3.16887e-50	0.354012	0.259	0.125	4.38794e-45	LINC00402	94531
chr17-40316271-40328104	2.24065e-72	0.353954	0.365	0.214	3.10263e-67	RARA	0
chr15-85701791-85708895	4.31369e-79	0.352297	0.214	0.074	5.97317e-74	AKAP13	0
chr1-156812659-156818077	7.74214e-58	0.350528	0.233	0.104	1.07205e-52	NTRK1	0
chr19-54136085-54138976	3.28696e-56	0.349831	0.326	0.186	4.55145e-51	CNOT3	0
chr1-24960347-24967413	1.19618e-66	0.346692	0.206	0.074	1.65635e-61	RUNX3	0
chr1-12165252-12175560	1.75355e-69	0.342597	0.264	0.122	2.42814e-64	TNFRSF1B	0
chr11-35164663-35168008	5.59563e-58	0.33939	0.207	0.081	7.74827e-53	CD44	0
chr10-110353092-110358039	1.10202e-55	0.33921	0.224	0.096	1.52597e-50	SMNDC1	48140
chr14-91415059-91419530	3.15342e-52	0.339121	0.215	0.089	4.36654e-47	CCDC88C	0
chr10-84327800-84330830	1.34753e-59	0.335821	0.204	0.083	1.86593e-54	CCSER2	0
chr22-37241260-37245415	4.81903e-66	0.335747	0.222	0.084	6.67291e-61	RAC2	0
chr19-41261681-41267128	1.19941e-52	0.334523	0.349	0.215	1.66083e-47	HNRNPUL1	0
chr2-30230528-30236352	8.64537e-54	0.334304	0.224	0.099	1.19712e-48	LBH	0
chr2-30145825-30148668	2.27364e-50	0.333006	0.303	0.172	3.14831e-45	YPEL5	0
chr16-4413977-4417377	6.18908e-55	0.330377	0.221	0.097	8.57001e-50	CORO7	0
chr1-24924739-24931146	5.88157e-53	0.330118	0.219	0.101	8.14421e-48	RUNX3	0
chr19-4470856-4472609	5.28405e-49	0.327464	0.27	0.142	7.31683e-44	CTB-50L17.10	0
chr19-6423406-6425984	2.12307e-52	0.327062	0.289	0.152	2.93982e-47	KHSRP	0
chr16-88700100-88707620	8.70453e-58	0.326964	0.25	0.124	1.20532e-52	CTU2	0
chr6-151389264-151393312	4.64227e-47	0.325773	0.268	0.144	6.42815e-42	ZBTB2	0
chr16-88451702-88457554	2.18731e-46	0.323271	0.272	0.15	3.02877e-41	ZFPM1	0
chr16-30657168-30661511	3.62334e-54	0.322938	0.378	0.247	5.01723e-49	FBRS	0
chr12-46266262-46270929	6.24515e-51	0.322869	0.214	0.095	8.64765e-46	SLC38A1	0
chr17-63696332-63702928	3.6633e-58	0.321364	0.218	0.093	5.07257e-53	LIMD2	0
chr12-92129670-92148008	1.59964e-45	0.318718	0.466	0.341	2.21503e-40	BTG1	0
chr2-239399317-239402342	1.69792e-52	0.318309	0.26	0.14	2.35112e-47	HDAC4	0
chr19-54187988-54192289	2.15266e-51	0.317964	0.424	0.294	2.98079e-46	TSEN34	0
chr19-42267626-42271591	1.88173e-47	0.317278	0.359	0.23	2.60563e-42	CIC	0
chr6-111870058-111874418	7.24486e-57	0.317107	0.206	0.086	1.0032e-51	FYN	0
chr9-3524289-3529083	2.47753e-46	0.316434	0.317	0.194	3.43063e-41	RFX3	0
chr3-45991392-45996313	1.17528e-48	0.31587	0.2	0.084	1.62741e-43	FYCO1	0
chr19-49874687-49878867	8.91182e-54	0.314839	0.334	0.202	1.23402e-48	TBC1D17	0
chr12-103928306-103931938	8.40176e-51	0.314648	0.314	0.178	1.16339e-45	HSP90B1	0
chr7-120949778-120952143	1.19604e-52	0.313783	0.229	0.106	1.65616e-47	ING3	0
chr2-240564686-240570013	2.18734e-52	0.313233	0.258	0.139	3.0288e-47	RNPEPL1	0
chr17-7571932-7575702	4.37449e-54	0.311364	0.265	0.137	6.05735e-49	SENP3-EIF4A1	0
chr10-35194818-35197181	5.95456e-56	0.310875	0.207	0.084	8.24528e-51	CREM	0
chr12-25384972-25388847	5.52823e-47	0.309796	0.274	0.15	7.65494e-42	RP11-707G18.1	0
chr2-54570746-54576329	1.77748e-41	0.309344	0.253	0.133	2.46128e-36	SPTBN1	0
chr6-137866051-137885785	9.75139e-56	0.309316	0.458	0.325	1.35028e-50	TNFAIP3	0
chr17-28948293-28954274	1.20652e-55	0.308977	0.302	0.176	1.67067e-50	PHF12	0
chr14-105485541-105492484	5.0523e-44	0.306382	0.388	0.271	6.99592e-39	AL928654.7	0
chr11-14890655-14892750	2.95895e-47	0.305271	0.231	0.112	4.09726e-42	CYP2R1	0
chr13-76990600-76993536	1.29747e-52	0.304444	0.24	0.116	1.7966e-47	RP11-226E21.4	0
chr12-108628159-108636308	2.11516e-48	0.302616	0.287	0.161	2.92886e-43	SELPLG	0
chr2-196166781-196174905	1.38518e-46	0.301578	0.249	0.134	1.91806e-41	STK17B	0
chr2-219277436-219280445	1.98523e-44	0.299522	0.272	0.151	2.74894e-39	DNAJB2	0
chr19-18276994-18283171	9.69169e-52	0.298137	0.309	0.188	1.34201e-46	JUND	0
chr7-139358467-139361166	1.44015e-47	0.296374	0.245	0.125	1.99418e-42	LUC7L2	0
chr19-14380187-14386019	2.73814e-46	0.294921	0.246	0.133	3.7915e-41	ADGRE5	0
chr7-152463085-152465238	4.83635e-50	0.294869	0.227	0.117	6.6969e-45	LINC01003	0
chr1-30717656-30719840	3.02734e-46	0.294	0.264	0.151	4.19196e-41	MATN1	0
chr7-601168-605429	4.24566e-64	0.292567	0.205	0.075	5.87897e-59	PRKAR1B	0
chr3-133572240-133576444	9.8225e-42	0.290072	0.297	0.189	1.36012e-36	CDV3	0
chrX-107710693-107718492	1.18115e-37	0.289195	0.235	0.133	1.63554e-32	TSC22D3	0
chr17-41687763-41690224	1.64238e-48	0.287639	0.237	0.126	2.2742e-43	EIF1	0
chr10-3773592-3787283	3.31251e-51	0.287611	0.432	0.308	4.58683e-46	KLF6	0
chr12-12714084-12727188	1.85156e-44	0.287362	0.412	0.304	2.56386e-39	APOLD1	0
chr22-40950256-40952802	5.67148e-48	0.287082	0.227	0.119	7.8533e-43	RBX1	0
chr10-3803239-3808253	1.89106e-52	0.286226	0.217	0.103	2.61856e-47	KLF6	17957
chr3-13011365-13016869	4.19351e-54	0.285765	0.222	0.101	5.80675e-49	IQSEC1	0
chr8-25457091-25460961	1.25362e-42	0.283295	0.277	0.166	1.73589e-37	KCTD9	0
chr15-50906830-50910965	7.24005e-46	0.282976	0.255	0.14	1.00253e-40	AP4E1	0
chr17-78126844-78134931	5.16651e-39	0.281941	0.235	0.139	7.15407e-34	TMC8	0
chr6-136790964-136793942	4.84393e-41	0.279475	0.226	0.118	6.70739e-36	MAP3K5	0
chr19-19062438-19065564	4.58001e-46	0.279419	0.234	0.118	6.34194e-41	SLC25A42	0
chr1-2544552-2549691	6.38953e-47	0.278367	0.237	0.126	8.84759e-42	RP3-395M20.12	0
chr6-26195114-26200488	5.24993e-41	0.278137	0.274	0.164	7.26958e-36	RP1-34B20.21	0
chr8-17922179-17924593	6.14494e-41	0.277328	0.22	0.112	8.5089e-36	PCM1	0
chr7-130954206-130962748	1.29136e-38	0.275471	0.244	0.142	1.78815e-33	RP11-138A9.2	14544
chr1-3899350-3901854	1.11906e-41	0.275093	0.281	0.167	1.54956e-36	C1orf174	0
chr13-99431869-99435147	4.56701e-44	0.274024	0.217	0.11	6.32394e-39	UBAC2	45434
chr20-44965919-44971903	8.43421e-42	0.273092	0.202	0.105	1.16789e-36	STK4	0
chr17-45221264-45232108	2.39334e-51	0.27198	0.303	0.178	3.31406e-46	FMNL1	0
chr19-36213718-36215913	4.42634e-44	0.271741	0.204	0.1	6.12915e-39	ZNF565	0
chr19-13845984-13848313	8.08959e-42	0.270003	0.214	0.113	1.12016e-36	MIR24-2	9624
chr19-55338258-55341630	7.52465e-40	0.269808	0.332	0.22	1.04194e-34	KMT5C	0
chr14-68778937-68787805	5.66666e-36	0.269695	0.218	0.123	7.84663e-31	ZFP36L1	0
chr19-45177562-45180072	3.71173e-43	0.268593	0.292	0.18	5.13963e-38	AC005779.2	0
chr1-203323878-203329291	2.22046e-37	0.268416	0.212	0.11	3.07466e-32	FMOD	11336
chr19-10717063-10720025	1.21144e-38	0.268036	0.274	0.171	1.67748e-33	DNM2	0
chr1-110337507-110342254	2.42711e-39	0.267942	0.354	0.241	3.36082e-34	RBM15	0
chr17-17970741-17973335	3.09487e-42	0.26772	0.248	0.14	4.28546e-37	TOM1L2	0
chr12-53498382-53502138	2.89007e-38	0.267589	0.277	0.17	4.00188e-33	TARBP2	0
chr11-9459440-9462655	1.10622e-38	0.267581	0.252	0.154	1.53178e-33	ZNF143	0
chr9-120924515-120929812	2.08464e-38	0.267087	0.247	0.151	2.8866e-33	TRAF1	0
chr8-42151815-42156540	1.47362e-36	0.267041	0.284	0.179	2.04052e-31	AP3M2	0
chr5-177425431-177432511	1.68845e-41	0.266058	0.317	0.205	2.338e-36	GRK6	0
chr2-237672962-237675496	1.20772e-36	0.264889	0.207	0.115	1.67233e-31	LRRFIP1	0
chr3-36991993-36994801	1.12588e-35	0.264744	0.306	0.202	1.55901e-30	EPM2AIP1	0
chr1-119139296-119141506	2.42721e-33	0.263593	0.238	0.14	3.36096e-28	WARS2	0
chr10-99618775-99622131	3.35684e-46	0.263312	0.292	0.173	4.64822e-41	SLC25A28	0
chr10-1047895-1050985	9.18194e-39	0.262987	0.236	0.132	1.27142e-33	IDI1	0
chr12-14955900-14962433	5.35843e-37	0.262826	0.226	0.125	7.41981e-32	ARHGDIB	0
chr14-99264696-99275193	5.36259e-30	0.262403	0.247	0.145	7.42558e-25	BCL11B	0
chr19-10565130-10569816	7.62329e-41	0.261324	0.243	0.139	1.0556e-35	KRI1	0
chr6-27836553-27840118	1.01836e-37	0.260608	0.253	0.155	1.41013e-32	HIST1H2AK	0
chr2-44167252-44171780	3.53696e-37	0.2604	0.363	0.259	4.89762e-32	PPM1B	0
chr17-7306557-7309537	7.23165e-37	0.259422	0.233	0.141	1.00137e-31	EIF5A	0
chr15-63188607-63193029	2.25027e-43	0.259371	0.222	0.119	3.11595e-38	RAB8B	0
chr1-228457035-228459646	4.53726e-33	0.258735	0.206	0.106	6.28274e-28	HIST3H2BB	0
chr12-750806-756038	2.95623e-37	0.258072	0.282	0.184	4.09349e-32	WNK1	0
chr6-26043005-26046054	1.48102e-39	0.257941	0.202	0.109	2.05077e-34	HIST1H2BB	0
chr17-7482965-7486612	1.68613e-47	0.257642	0.239	0.126	2.33479e-42	POLR2A	0
chr5-139389427-139395025	5.22811e-33	0.257451	0.231	0.142	7.23937e-28	MZB1	0
chr19-55653359-55657819	1.18802e-43	0.257436	0.286	0.174	1.64506e-38	U2AF2	0
chr11-64184455-64187612	5.56453e-43	0.2574	0.272	0.166	7.7052e-38	STIP1	0
chr1-25429751-25432363	2.18346e-35	0.257252	0.22	0.124	3.02343e-30	TMEM57	0
chr1-235864678-235868623	2.05096e-36	0.256775	0.222	0.124	2.83996e-31	LYST	0
chr2-175167047-175169329	7.72143e-38	0.256547	0.257	0.154	1.06919e-32	ATF2	0
chr2-96140953-96149311	1.20784e-38	0.254601	0.317	0.212	1.6725e-33	DUSP2	0
chr16-11250037-11259633	1.24293e-43	0.254464	0.312	0.205	1.72108e-38	SOCS1	0
chr5-119328347-119342621	1.63742e-32	0.253652	0.277	0.178	2.26733e-27	TNFAIP8	0
chr11-59614279-59616990	6.27975e-40	0.253616	0.324	0.216	8.69557e-35	OSBP	0
chr17-8185456-8190836	1.55624e-36	0.253585	0.26	0.16	2.15492e-31	AC129492.1	0
chr19-7829108-7830635	3.38734e-34	0.253472	0.214	0.122	4.69045e-29	EVI5L	0
chr5-91379632-91385336	3.0831e-35	0.252691	0.347	0.239	4.26916e-30	ARRDC3	0
chr2-152715854-152719586	2.42372e-36	0.252351	0.302	0.203	3.35613e-31	PRPF40A	0
chr6-110813895-110816889	1.89599e-39	0.251933	0.241	0.136	2.62538e-34	CDK19	0
chr19-44889936-44891840	1.27992e-36	0.251867	0.268	0.173	1.77231e-31	TOMM40	0
chr20-18506623-18508866	2.16569e-37	0.250928	0.245	0.14	2.99883e-32	SEC23B	0
chr13-31159023-31163241	1.93e-36	0.250767	0.282	0.183	2.67247e-31	HSPH1	0
chr6-27892497-27895966	1.00738e-36	0.250662	0.225	0.13	1.39492e-31	HIST1H2BO	0
chr17-45246828-45249320	3.85576e-35	0.250162	0.212	0.112	5.33908e-30	FMNL1	0
chr22-36775347-36777069	2.40409e-38	0.250069	0.231	0.126	3.32894e-33	IFT27	0
chr8-11860104-11869848	9.08234e-06	-0.252194	0.13	0.204	1	CTSB	0
chr2-73980739-73988513	3.82806e-09	-0.253948	0.13	0.225	0.000530072	TET3	0
chr15-60388751-60399288	0.000210846	-0.257404	0.217	0.313	1	ANXA2	0
chr11-118908941-118915852	1.05126e-08	-0.266622	0.12	0.211	0.00145568	BCL9L	0
chr11-61961491-61970564	5.26209e-06	-0.2794	0.142	0.232	0.728642	FTH1	0
chr7-5554452-5559549	1.28157e-11	-0.294321	0.102	0.209	1.77459e-06	ACTB	0
chr16-56605911-56612087	4.88892e-08	-0.297176	0.17	0.276	0.00676969	MT2A	0
chr3-10191348-10197121	1.60742e-12	-0.298332	0.099	0.21	2.22579e-07	IRAK2	0
chr11-94127580-94132709	6.5354e-12	-0.300895	0.117	0.226	9.04957e-07	PANX1	0
chr17-48045207-48056248	1.79875e-05	-0.302263	0.226	0.32	1	NFE2L1	0
chr1-156133598-156158080	0.0274202	-0.302281	0.223	0.302	1	SEMA4A	0
chr14-100371287-100378278	1.10895e-12	-0.303707	0.134	0.241	1.53556e-07	WARS	0
chr5-177299806-177305276	7.52009e-14	-0.307595	0.112	0.228	1.04131e-08	PRELID1	0
chr20-10670060-10675444	6.22946e-15	-0.312603	0.086	0.2	8.62594e-10	JAG1	0
chr1-161196796-161203163	3.27518e-10	-0.313449	0.132	0.237	4.53514e-05	NDUFS2	0
chr1-156113083-156131066	0.0287724	-0.314493	0.337	0.428	1	LMNA	0
chr1-161017779-161022963	3.49589e-16	-0.317133	0.094	0.205	4.84076e-11	F11R	0
chr7-1456830-1464247	1.01463e-09	-0.318231	0.149	0.253	0.000140495	MICALL2	0
chr7-1566751-1572625	5.61656e-17	-0.318566	0.1	0.21	7.77724e-12	PSMG3	0
chr16-50695290-50700545	4.72287e-13	-0.318994	0.118	0.234	6.53975e-08	NOD2	0
chr13-114063599-114069430	4.36776e-14	-0.339471	0.102	0.221	6.04803e-09	RASA3	0
chr8-118107074-118113791	1.27996e-16	-0.340549	0.132	0.249	1.77237e-11	EXT1	0
chr16-54926352-54933952	6.72685e-18	-0.347233	0.093	0.216	9.31467e-13	IRX5	0
chr14-102069030-102084339	1.69124e-16	-0.348483	0.108	0.212	2.34186e-11	HSP90AA1	0
chr11-10302356-10309949	5.05295e-14	-0.350214	0.104	0.223	6.99681e-09	ADM	0
chr21-38804164-38811850	2.06269e-14	-0.350382	0.118	0.245	2.85621e-09	ETS2	0
chr8-133281263-133298701	2.22884e-11	-0.350426	0.22	0.351	3.08628e-06	NDRG1	0
chr14-35396625-35407648	1.57478e-06	-0.353458	0.276	0.392	0.21806	NFKBIA	0
chr16-85610181-85617372	3.64038e-20	-0.359641	0.091	0.226	5.04084e-15	GSE1	0
chr1-153562384-153569153	1.68874e-24	-0.365273	0.097	0.237	2.3384e-19	S100A2	0
chr7-98280529-98288838	1.78484e-16	-0.369112	0.132	0.259	2.47147e-11	BRI3	0
chr9-98248043-98257070	7.86775e-18	-0.382035	0.154	0.289	1.08945e-12	TBC1D2	0
chr7-76301804-76308290	1.05008e-27	-0.386707	0.092	0.228	1.45405e-22	HSPB1	0
chr1-39102288-39108965	1.6462e-24	-0.389951	0.073	0.21	2.27949e-19	MACF1	0
chr5-132468821-132493402	6.2635e-12	-0.401257	0.354	0.485	8.67307e-07	IRF1	0
chr4-2790670-2802246	2.01621e-16	-0.402651	0.109	0.239	2.79184e-11	SH3BP2	0
chr9-100425809-100430761	4.2582e-36	-0.407427	0.057	0.202	5.89634e-31	MSANTD3	0
chr9-113150487-113156837	2.62343e-33	-0.417566	0.075	0.229	3.63266e-28	SLC31A2	0
chr14-61560353-61567214	7.73364e-36	-0.424958	0.064	0.212	1.07088e-30	RP11-47I22.4	0
chr14-50037808-50041088	2.03178e-31	-0.430797	0.117	0.284	2.81341e-26	LINC01588	0
chr9-93111367-93122066	4.19134e-29	-0.444646	0.061	0.2	5.80375e-24	CARD19	0
chr7-20328961-20332902	1.13501e-45	-0.445392	0.065	0.229	1.57165e-40	ITGB8	0
chr19-44843766-44850612	2.37448e-35	-0.446377	0.047	0.2	3.28794e-30	NECTIN2	0
chr14-35331537-35338223	1.07228e-42	-0.449149	0.072	0.238	1.48479e-37	PSMA6	14043
chr14-68974665-68980657	3.82966e-54	-0.457508	0.039	0.202	5.30293e-49	ACTN1	0
chr1-155123866-155130825	7.8237e-49	-0.458611	0.045	0.202	1.08335e-43	EFNA1	0
chr14-64702992-64709165	1.70786e-53	-0.461843	0.037	0.205	2.36488e-48	PLEKHG3	0
chr17-81080227-81098476	9.34798e-22	-0.463117	0.184	0.333	1.29442e-16	BAIAP2	0
chr9-81686202-81691058	3.50727e-53	-0.469149	0.039	0.206	4.85652e-48	TLE1	0
chr6-10411464-10420771	1.64909e-53	-0.472256	0.042	0.202	2.2835e-48	TFAP2A	0
chr17-50054902-50065400	1.48569e-41	-0.478178	0.072	0.232	2.05723e-36	ITGA3	0
chr8-102787762-102791811	2.87139e-65	-0.479914	0.027	0.2	3.97601e-60	KB-1732A1.1	13705
chr19-10283100-10293910	2.19279e-24	-0.484353	0.114	0.27	3.03636e-19	ICAM1	0
chr14-74565615-74575163	3.39611e-51	-0.485607	0.059	0.23	4.7026e-46	LTBP2	0
chr14-67409293-67414921	2.83292e-68	-0.490282	0.029	0.208	3.92274e-63	PLEK2	0
chr9-69172431-69177393	6.48004e-61	-0.503074	0.041	0.221	8.97291e-56	TJP2	0
chr1-16619880-16626800	7.78437e-51	-0.511285	0.058	0.238	1.0779e-45	RP5-1182A14.5	2150
chr7-26177257-26189500	5.63865e-49	-0.517327	0.072	0.238	7.80784e-44	NFE2L3	0
chr3-194132289-194142788	4.71729e-39	-0.52507	0.112	0.306	6.53204e-34	HES1	0
chr1-234655248-234659980	7.41846e-82	-0.526861	0.017	0.207	1.02723e-76	RP4-781K5.4	0
chr14-85527826-85537112	2.5212e-80	-0.535038	0.019	0.205	3.49111e-75	FLRT2	0
chr20-45336372-45349001	2.8698e-54	-0.535249	0.087	0.286	3.97381e-49	SDC4	0
chr22-50298634-50309817	2.93326e-56	-0.537171	0.043	0.231	4.06169e-51	PLXNB2	0
chr17-77318478-77326265	1.59338e-41	-0.53876	0.072	0.258	2.20635e-36	SEPT9	0
chr1-58571954-58579395	1.1363e-69	-0.549135	0.043	0.231	1.57344e-64	TACSTD2	0
chr1-209648256-209656433	2.70921e-77	-0.550211	0.028	0.23	3.75145e-72	LAMB3	0
chr7-30167966-30173965	3.66047e-89	-0.552446	0.014	0.208	5.06865e-84	AC007036.6	2421
chr6-11769220-11773392	8.98192e-93	-0.573687	0.015	0.218	1.24373e-87	ADTRP	0
chr1-201304856-201312933	2.74713e-90	-0.574911	0.024	0.226	3.80395e-85	PKP1	0
chr7-74475339-74484097	7.33922e-94	-0.575727	0.014	0.218	1.01626e-88	GTF2IRD1	0
chr3-159761432-159767006	6.31497e-66	-0.576245	0.044	0.245	8.74434e-61	IQCJ-SCHIP1	0
chr8-39939247-39944548	3.93737e-91	-0.586945	0.019	0.226	5.45207e-86	IDO2	0
chr9-121285673-121290287	1.97664e-99	-0.612063	0.018	0.238	2.73706e-94	GSN	0
chr1-153607928-153617769	7.05303e-89	-0.617874	0.029	0.24	9.76633e-84	S100A14	0
chr11-65433938-65450914	8.0435e-69	-0.740857	0.095	0.328	1.11378e-63	NEAT1	0
chr12-52511525-52526326	4.42384e-118	-0.746775	0.028	0.269	6.12569e-113	KRT5	0
chr7-5418380-5430635	9.08185e-110	-0.799512	0.068	0.357	1.25756e-104	TNRC18	0
chr8-133247179-133280717	6.18853e-96	-0.850172	0.088	0.36	8.56926e-91	NDRG1	0
chr1-209606824-209636948	8.66917e-141	-1.03891	0.072	0.403	1.20042e-135	LAMB3	0

## Sheet: DC
	p_val	avg_log2FC	pct.1	pct.2	p_val_adj	gene	distance
chr15-85578895-85586663	4.24082e-20	1.21807	0.605	0.153	5.87227e-15	AKAP13	0
chr8-133247179-133280717	9.23108e-14	1.19374	0.692	0.242	1.27823e-08	NDRG1	0
chr19-18501774-18505678	1.83462e-41	1.17358	0.486	0.038	2.54039e-36	ELL	0
chr11-72735555-72742559	1.89414e-24	1.16136	0.535	0.096	2.62282e-19	ARAP1	0
chr1-159825550-159831014	1.02833e-30	1.1442	0.481	0.061	1.42393e-25	SLAMF8	0
chr19-10283100-10293910	3.88106e-12	1.13672	0.665	0.195	5.3741e-07	ICAM1	0
chr19-10415698-10426967	4.36267e-14	1.1357	0.605	0.198	6.04099e-09	PDE4A	0
chr9-131627411-131631272	9.45716e-27	1.1259	0.541	0.092	1.30953e-21	RAPGEF1	0
chr8-22547466-22555246	1.81179e-24	1.12234	0.524	0.08	2.50879e-19	SORBS3	0
chr6-159978359-159985850	2.3418e-20	1.1194	0.573	0.125	3.24269e-15	IGF2R	0
chr12-55846905-55849802	1.49288e-27	1.10857	0.465	0.045	2.06719e-22	MMP19	3938
chr17-77318478-77326265	4.5174e-13	1.1034	0.632	0.172	6.25524e-08	SEPT9	0
chr10-79241487-79250825	4.02698e-17	1.10028	0.627	0.155	5.57617e-12	ZMIZ1	0
chr5-172763619-172774146	8.58585e-07	1.09479	0.768	0.378	0.118888	DUSP1	0
chr3-141926944-141938560	2.62555e-20	1.09161	0.449	0.087	3.6356e-15	ATP1B3	429
chr12-104667117-104674090	1.38898e-19	1.08853	0.589	0.134	1.92332e-14	CHST11	0
chr8-11860104-11869848	1.94307e-15	1.08617	0.595	0.161	2.69057e-10	CTSB	0
chr1-156133598-156158080	5.78614e-11	1.08574	0.697	0.256	8.01206e-06	SEMA4A	0
chr1-201708909-201716538	4.87438e-15	1.08436	0.53	0.114	6.74955e-10	NAV1	0
chr10-73905498-73912292	3.3457e-15	1.08228	0.568	0.122	4.6328e-10	PLAU	0
chr6-134167583-134178928	2.16598e-11	1.0805	0.562	0.185	2.99924e-06	SGK1	0
chr11-65496431-65511284	2.23521e-05	1.08023	0.724	0.335	1	AP000769.1	0
chr9-93111367-93122066	3.29593e-14	1.07041	0.541	0.134	4.56387e-09	CARD19	0
chr17-78349488-78361393	3.7481e-08	1.06339	0.719	0.3	0.00519	SOCS3	0
chr20-37314766-37318673	2.03482e-35	1.05869	0.459	0.035	2.81762e-30	MANBAL	0
chr7-151793390-151798292	2.54378e-20	1.05451	0.551	0.118	3.52237e-15	PRKAG2	0
chr22-50298634-50309817	1.85497e-13	1.052	0.589	0.145	2.56857e-08	PLXNB2	0
chr20-23081657-23088286	2.43821e-26	1.04652	0.443	0.045	3.37619e-21	CD93	0
chr17-7833426-7845483	5.70558e-05	1.04638	0.773	0.388	1	DNAH2	0
chr14-35396625-35407648	1.99535e-06	1.04509	0.703	0.336	0.276296	NFKBIA	0
chr1-27884076-27888074	2.51989e-32	1.0396	0.449	0.037	3.48928e-27	THEMIS2	0
chr6-137866051-137885785	1.42753e-05	1.03637	0.719	0.362	1	TNFAIP3	0
chr19-39401015-39415204	0.000532878	1.0343	0.816	0.473	1	ZFP36	0
chr1-150558471-150580530	0.000667175	1.02526	0.822	0.463	1	MCL1	0
chr11-65414875-65433409	0.000265543	1.02484	0.865	0.491	1	NEAT1	0
chr11-47390738-47395821	1.19167e-27	1.0244	0.443	0.04	1.6501e-22	SLC39A13	11310
chr22-50522683-50534831	5.24424e-07	1.02183	0.676	0.28	0.072617	SCO2	0
chr11-60949682-60954877	1.6666e-17	1.02116	0.486	0.09	2.30774e-12	SLC15A3	0
chr1-192575171-192582077	1.11441e-15	1.0192	0.524	0.137	1.54312e-10	RGS1	0
chr2-144514730-144524818	2.13555e-13	1.01491	0.53	0.136	2.9571e-08	ZEB2	0
chr15-90060796-90065623	6.1698e-22	1.01429	0.4	0.051	8.54333e-17	ZNF710	0
chr11-61961491-61970564	1.40578e-09	1.01341	0.541	0.186	0.000194658	FTH1	0
chr20-59004265-59009482	1.47726e-16	1.00315	0.47	0.087	2.04557e-11	CTSZ	0
chr20-50267093-50272508	6.87122e-29	1.00283	0.449	0.041	9.51458e-24	LINC01272	0
chr17-38698716-38707344	1.50158e-11	1.00085	0.638	0.224	2.07923e-06	MLLT6	0
chr4-2790670-2802246	1.06336e-07	0.996051	0.551	0.177	0.0147243	SH3BP2	0
chr1-156113083-156131066	0.00863476	0.993907	0.703	0.383	1	LMNA	0
chr7-151084808-151090164	5.94664e-19	0.983215	0.481	0.086	8.23431e-14	AGAP3	0
chr14-105068782-105071362	1.05326e-23	0.977673	0.411	0.047	1.45845e-18	GPR132	3336
chr17-58327653-58340507	6.39918e-09	0.975817	0.632	0.241	0.000886094	TSPOAP1	0
chr6-14120479-14124298	5.29373e-24	0.974846	0.405	0.038	7.33023e-19	CD83	0
chr17-7577786-7582490	2.40861e-17	0.970325	0.459	0.084	3.3352e-12	CD68	0
chr3-119584912-119590151	2.57133e-30	0.970228	0.422	0.036	3.56052e-25	ADPRH	0
chr6-14920967-14923372	2.69083e-33	0.969944	0.368	0.022	3.72599e-28	RP11-146I2.1	0
chr20-50273273-50276764	3.32675e-29	0.969044	0.405	0.03	4.60655e-24	LINC01272	0
chr2-69942978-69948646	5.22757e-13	0.958804	0.465	0.102	7.23861e-08	MXD1	32
chr2-201114854-201128091	2.09211e-07	0.958063	0.708	0.307	0.0289695	CFLAR	0
chr13-114063599-114069430	2.93422e-08	0.957611	0.508	0.164	0.00406301	RASA3	0
chr15-73681603-73687830	9.35509e-17	0.957052	0.432	0.071	1.2954e-11	CD276	0
chr1-234977952-234981448	7.24698e-11	0.95677	0.486	0.113	1.00349e-05	RP11-443B7.3	0
chr6-163353934-163356866	2.26205e-26	0.953324	0.411	0.036	3.13226e-21	PACRG	38441
chr1-220876533-220881792	4.35258e-21	0.952581	0.443	0.062	6.02702e-16	HLX	0
chr10-3773592-3787283	1.51314e-06	0.949019	0.735	0.34	0.209524	KLF6	0
chr6-89032574-89038045	7.67675e-11	0.948377	0.476	0.111	1.063e-05	PNRC1	42705
chr7-112080342-112082680	3.69971e-25	0.948039	0.4	0.033	5.12299e-20	DOCK4	0
chr7-55531605-55539935	1.96766e-06	0.947026	0.557	0.186	0.272461	VOPP1	0
chr6-44245083-44260808	0.00441067	0.943669	0.67	0.343	1	HSP90AB1	0
chr19-12781544-12787336	1.12868e-08	0.943295	0.519	0.152	0.00156288	HOOK2	0
chr1-236146701-236152048	2.48166e-25	0.9426	0.4	0.036	3.43635e-20	GPR137B	0
chr20-46007600-46012270	5.68882e-12	0.940034	0.427	0.084	7.8773e-07	MMP9	0
chr19-35898360-35905749	4.7084e-09	0.937112	0.524	0.157	0.000651972	TYROBP	0
chr17-36195396-36197757	1.92144e-27	0.936974	0.395	0.042	2.66062e-22	CCL3L3	0
chr5-78507650-78511941	4.20864e-23	0.936718	0.4	0.038	5.8277e-18	LHFPL2	0
chr11-60375445-60378842	6.22832e-31	0.936189	0.389	0.03	8.62435e-26	MS4A7	0
chr17-64776395-64782050	4.91749e-11	0.93541	0.47	0.113	6.80924e-06	RP13-104F24.2	0
chr10-69064200-69066542	2.11116e-18	0.932297	0.427	0.06	2.92332e-13	KIF1BP	20655
chr16-87953391-87957485	7.20437e-19	0.930474	0.476	0.079	9.9759e-14	BANP	0
chr7-150432962-150436188	8.42777e-35	0.928477	0.4	0.027	1.16699e-29	LINC00996	0
chr3-4975858-4987605	0.0568782	0.927985	0.741	0.417	1	BHLHE40	0
chr19-44843766-44850612	8.15492e-10	0.925373	0.53	0.129	0.000112921	NECTIN2	0
chr11-78416190-78421466	3.28553e-12	0.921678	0.492	0.12	4.54947e-07	GAB2	0
chr3-194571679-194576117	2.09936e-13	0.92023	0.449	0.086	2.90698e-08	TMEM44	11555
chr1-66330216-66337618	1.042e-10	0.919417	0.519	0.15	1.44286e-05	PDE4B	0
chr17-30968268-30972762	1.68281e-16	0.917906	0.454	0.079	2.33019e-11	RNF135	0
chr11-68036339-68041119	3.35912e-17	0.915227	0.476	0.091	4.65137e-12	NDUFS8	0
chr22-21936228-21940987	7.8595e-11	0.915225	0.443	0.102	1.0883e-05	PPM1F	0
chr19-48962120-48970161	1.19742e-10	0.912332	0.562	0.155	1.65807e-05	FTL	0
chr16-11179458-11184367	4.29434e-19	0.910551	0.443	0.063	5.94637e-14	CLEC16A	0
chr3-196191346-196194716	5.92684e-27	0.909512	0.416	0.047	8.20689e-22	ZDHHC19	2732
chr19-54207290-54211579	1.87356e-22	0.908801	0.459	0.076	2.59432e-17	RPS9	0
chr3-46404728-46408379	2.56583e-16	0.908537	0.416	0.068	3.55291e-11	CCRL2	0
chr5-172409875-172415325	8.72992e-14	0.904926	0.4	0.065	1.20883e-08	SH3PXD2B	0
chr1-66394994-66398305	8.4167e-27	0.902961	0.395	0.032	1.16546e-21	PDE4B	20414
chr6-30678896-30689188	0.000288176	0.902738	0.6	0.267	1	PPP1R18	0
chr4-184848293-184851700	1.00899e-26	0.902147	0.395	0.034	1.39714e-21	MIR3945HG	0
chr19-17074171-17080799	3.13186e-05	0.901694	0.524	0.196	1	HAUS8	0
chr1-19476292-19480085	5.36658e-20	0.901174	0.4	0.053	7.4311e-15	CAPZB	0
chr1-12165252-12175560	1.36896e-08	0.899759	0.519	0.162	0.0018956	TNFRSF1B	0
chr1-154403150-154408812	2.70282e-08	0.895993	0.486	0.148	0.00374259	IL6R	0
chr15-64891427-64897994	9.31699e-08	0.89573	0.519	0.175	0.0129012	AC069368.3	0
chr18-2845100-2848929	3.64517e-22	0.895631	0.4	0.05	5.04747e-17	EMILIN2	0
chr9-93122634-93138501	4.75408e-06	0.895333	0.589	0.229	0.658297	NINJ1	0
chr12-121143594-121146263	2.80206e-23	0.892934	0.416	0.047	3.88001e-18	P2RX7	0
chr9-133118881-133123768	9.99228e-11	0.888107	0.476	0.12	1.38363e-05	RALGDS	0
chr6-113854614-113860119	6.76741e-13	0.887661	0.492	0.114	9.37084e-08	MARCKS	0
chr6-336035-342905	6.72005e-15	0.887105	0.422	0.076	9.30525e-10	DUSP22	0
chr12-51387876-51395846	0.000244648	0.885845	0.492	0.171	1	GALNT6	0
chr9-131730476-131737613	6.40323e-09	0.885234	0.476	0.146	0.000886656	RAPGEF1	0
chr18-9705223-9713126	4.78666e-14	0.884011	0.416	0.073	6.62809e-09	RAB31	0
chr2-20183893-20187143	4.07524e-23	0.883541	0.4	0.04	5.64298e-18	SDC1	13653
chr9-113150487-113156837	6.80737e-09	0.881604	0.535	0.158	0.000942616	SLC31A2	0
chr14-89483990-89487393	1.57476e-32	0.880678	0.362	0.019	2.18057e-27	FOXN3	0
chr3-13011365-13016869	3.31318e-14	0.879719	0.519	0.133	4.58776e-09	IQSEC1	0
chr20-50501639-50505172	6.33652e-15	0.879069	0.405	0.059	8.77418e-10	PTPN1	5148
chr9-133112093-133116603	3.53181e-13	0.87639	0.459	0.097	4.89049e-08	RALGDS	0
chr3-187735813-187747308	6.8008e-07	0.875991	0.692	0.265	0.0941707	RP11-211G3.2	0
chr7-20217139-20221576	3.53552e-15	0.87333	0.47	0.106	4.89563e-10	MACC1	0
chr11-65433938-65450914	2.04789e-05	0.872092	0.595	0.227	1	NEAT1	0
chr10-71887861-71890728	1.02432e-16	0.871163	0.4	0.063	1.41838e-11	RP11-472G21.2	8753
chr11-93522821-93527328	4.69702e-24	0.870316	0.405	0.039	6.50396e-19	SMCO4	0
chr15-38128330-38131585	2.71625e-11	0.870219	0.395	0.064	3.76119e-06	RP11-346D14.1	8009
chr17-1107491-1112378	3.62265e-12	0.869626	0.465	0.105	5.01629e-07	ABR	0
chr14-103121021-103124532	1.76331e-11	0.868697	0.389	0.065	2.44166e-06	TNFAIP2	0
chr2-60526634-60531989	1.47739e-12	0.868007	0.362	0.054	2.04574e-07	BCL11A	0
chr3-196638929-196643843	2.82793e-18	0.864749	0.427	0.069	3.91584e-13	PIGX	0
chr1-2581540-2587856	5.37084e-08	0.862228	0.486	0.155	0.007437	FAM213B	0
chr15-79977286-79979490	2.90747e-27	0.860974	0.362	0.026	4.02597e-22	BCL2A1	5839
chr19-34988692-34991251	1.26658e-21	0.860903	0.33	0.027	1.75383e-16	GRAMD1A	3532
chr6-35047409-35051235	6.93518e-27	0.86049	0.384	0.03	9.60314e-22	ANKS1A	0
chr7-102424643-102427391	1.58306e-12	0.858132	0.395	0.081	2.19206e-07	PRKRIP1	0
chr2-231705316-231718180	0.0144932	0.855932	0.638	0.328	1	PTMA	0
chr6-31817396-31824207	0.0003424	0.855123	0.519	0.195	1	HSPA1A	0
chr8-1754415-1756428	3.24681e-19	0.854253	0.373	0.048	4.49586e-14	CLN8	0
chr13-113272511-113275835	1.81604e-23	0.853947	0.373	0.033	2.51467e-18	CUL4A	5402
chr12-6550346-6556766	3.17716e-10	0.852586	0.422	0.094	4.39942e-05	IFFO1	0
chr11-117814566-117819521	1.99155e-11	0.850876	0.476	0.129	2.7577e-06	DSCAML1	0
chr12-92550494-92555072	1.19889e-09	0.8495	0.411	0.093	0.00016601	RP11-693J15.5	58402
chr6-31829600-31837908	1.52128e-05	0.846619	0.541	0.209	1	C6orf48	0
chr17-78441667-78443554	1.94268e-28	0.843888	0.33	0.019	2.69002e-23	DNAH17	0
chr11-3836789-3842416	1.69522e-07	0.841425	0.503	0.17	0.0234738	RHOG	0
chr9-35616076-35620217	1.09321e-13	0.840657	0.378	0.069	1.51377e-08	CD72	0
chr2-65064495-65066317	8.55619e-17	0.839721	0.405	0.06	1.18478e-11	CEP68	0
chr17-83198789-83201565	1.99317e-15	0.839349	0.411	0.072	2.75994e-10	AC139099.6	10430
chr1-39102288-39108965	0.000167548	0.838486	0.476	0.147	1	MACF1	0
chr17-36210417-36213816	9.81662e-26	0.838004	0.368	0.035	1.35931e-20	CCL4L2	0
chr1-30753583-30758289	1.8921e-13	0.837546	0.438	0.094	2.61999e-08	LAPTM5	0
chr3-172133844-172139496	1.32396e-15	0.837085	0.432	0.087	1.83329e-10	FNDC3B	0
chr1-30743288-30750478	4.79719e-10	0.837029	0.411	0.112	6.64267e-05	LAPTM5	0
chr11-76626754-76630885	1.24656e-14	0.836367	0.362	0.053	1.72612e-09	RP11-672A2.5	0
chr17-68598971-68603949	4.50668e-19	0.836106	0.4	0.049	6.2404e-14	FAM20A	0
chr3-105365311-105370218	5.33487e-05	0.835915	0.562	0.211	1	ALCAM	0
chr3-127753751-127755751	1.43602e-32	0.834458	0.4	0.027	1.98846e-27	MGLL	0
chr5-178234246-178242171	6.82854e-12	0.833916	0.4	0.086	9.45548e-07	COL23A1	0
chr20-25308307-25311622	3.79187e-13	0.832952	0.427	0.089	5.2506e-08	ABHD12	0
chr2-205681758-205687828	2.17293e-08	0.830732	0.378	0.086	0.00300885	NRP2	0
chr1-8281761-8284550	1.57312e-32	0.828207	0.33	0.017	2.17831e-27	SLC45A1	33275
chr1-17629664-17631535	2.80762e-23	0.826437	0.346	0.027	3.88771e-18	ARHGEF10L	0
chr6-44056781-44063183	2.00821e-07	0.825484	0.449	0.11	0.0278077	RP5-1120P11.3	10729
chr10-102431692-102436605	3.45175e-14	0.824806	0.405	0.085	4.77964e-09	CUEDC2	0
chr5-150396743-150405237	3.63181e-13	0.824601	0.432	0.103	5.02897e-08	CD74	0
chr12-111402754-111408257	1.32723e-06	0.824265	0.476	0.159	0.183782	SH2B3	0
chr1-16611089-16619061	8.87413e-07	0.823749	0.47	0.139	0.12288	NBPF1	0
chr16-67243561-67249346	2.86989e-05	0.823615	0.535	0.198	1	SLC9A5	0
chr7-6432014-6437718	2.1136e-11	0.821444	0.346	0.062	2.9267e-06	DAGLB	0
chr9-104989659-104994100	2.50119e-08	0.820618	0.459	0.124	0.00346339	RP11-217B7.3	0
chr10-78972270-78976472	7.16084e-11	0.819384	0.454	0.107	9.91562e-06	RP11-481G8.2	24011
chr22-49959418-49968955	6.85691e-05	0.819232	0.508	0.187	1	PIM3	0
chr1-160574744-160579753	4.16491e-14	0.818376	0.335	0.063	5.76716e-09	CD84	0
chr11-62551455-62559686	0.00137914	0.817506	0.627	0.275	1	EEF1G	0
chr15-64840822-64847490	3.3891e-09	0.817455	0.443	0.123	0.000469289	PLEKHO2	0
chr17-15260261-15263677	2.0141e-13	0.816894	0.351	0.058	2.78892e-08	PMP22	0
chr15-41967735-41973348	8.74409e-09	0.816654	0.503	0.153	0.00121079	EHD4	0
chr17-40316271-40328104	1.06877e-05	0.816624	0.659	0.256	1	RARA	0
chr9-131666755-131671683	8.86806e-11	0.814557	0.443	0.112	1.22796e-05	RAPGEF1	0
chr15-89997985-90006121	0.000443556	0.814148	0.438	0.13	1	ZNF710	0
chr1-44799462-44814302	0.0690319	0.813027	0.681	0.376	1	BTBD19	0
chr10-128061993-128065556	2.43006e-10	0.812854	0.405	0.099	3.36491e-05	PTPRE	0
chr12-124912773-124922214	0.0456404	0.812295	0.681	0.372	1	UBC	0
chr1-150158298-150161316	4.91048e-26	0.812054	0.341	0.029	6.79954e-21	PLEKHO1	0
chr17-31580262-31582735	8.79345e-17	0.811071	0.368	0.049	1.21763e-11	RP1-41C23.1	426
chr6-36675952-36681244	5.17417e-07	0.809959	0.514	0.165	0.0716467	CDKN1A	0
chr1-207822483-207827253	4.18892e-10	0.809792	0.449	0.14	5.8004e-05	C1orf132	0
chr7-140314260-140318101	8.79949e-12	0.809444	0.4	0.083	1.21847e-06	SLC37A3	0
chr11-33721245-33724878	5.03361e-16	0.808302	0.411	0.064	6.97004e-11	CD59	0
chr2-96527103-96540585	0.00129648	0.807796	0.595	0.264	1	ARID5A	0
chr22-37281603-37285512	4.91219e-12	0.806851	0.351	0.067	6.80191e-07	CYTH4	0
chr20-40686389-40691006	1.69711e-06	0.806705	0.427	0.113	0.234999	MAFB	0
chr19-48871841-48885607	0.00351532	0.806209	0.632	0.296	1	PPP1R15A	0
chr10-110495643-110504916	0.000286274	0.805781	0.578	0.215	1	DUSP5	0
chr11-10302356-10309949	0.000317935	0.80571	0.454	0.168	1	ADM	0
chr5-170266427-170272727	1.42287e-12	0.804397	0.411	0.092	1.97025e-07	LCP2	0
chr2-47069399-47074613	1.65987e-11	0.804397	0.351	0.063	2.29842e-06	TTC7A	0
chr9-110253520-110259640	4.30782e-05	0.804132	0.514	0.196	1	TXN	0
chr19-2474448-2480130	0.00031406	0.804127	0.481	0.179	1	GADD45B	0
chr7-74475339-74484097	1.61418e-06	0.804027	0.443	0.13	0.223515	GTF2IRD1	0
chr4-158809358-158812501	8.43762e-16	0.803791	0.384	0.055	1.16836e-10	FNIP2	0
chr12-13097343-13104822	0.00563575	0.803199	0.476	0.193	1	GSG1	0
chr22-44023625-44027670	5.82786e-10	0.802743	0.368	0.076	8.06984e-05	PARVB	0
chr5-95840590-95844475	2.13974e-18	0.802178	0.357	0.042	2.9629e-13	AC008592.4	0
chr2-222707322-222709955	4.56064e-20	0.801966	0.362	0.035	6.31512e-15	MOGAT1	0
chr7-150784117-150786489	2.60934e-29	0.801246	0.357	0.022	3.61315e-24	TMEM176B	4795
chr22-22720078-22722435	2.86809e-21	0.801057	0.346	0.034	3.97145e-16	LL22NC03-102D1.18	26765
chr20-23142134-23145909	3.05425e-14	0.800677	0.378	0.058	4.22922e-09	LINC00656	9512
chr9-62798752-62803272	3.70312e-06	0.800342	0.4	0.129	0.512771	LINC01410	0
chr20-37381813-37385312	2.27132e-17	0.799559	0.319	0.032	3.14509e-12	SRC	0
chr14-94390047-94393075	3.87385e-18	0.799539	0.346	0.035	5.36412e-13	SERPINA1	0
chr19-17089528-17092437	8.35298e-20	0.799105	0.357	0.039	1.15664e-14	MYO9B	0
chr1-109820991-109824817	4.63273e-10	0.79879	0.378	0.075	6.41494e-05	RP4-735C1.6	3537
chr2-126655308-126659751	1.64602e-09	0.798765	0.373	0.09	0.000227925	GYPC	0
chr12-124388162-124393568	4.75088e-11	0.797444	0.395	0.079	6.57854e-06	NCOR2	0
chr10-14022234-14025967	2.81107e-27	0.79707	0.308	0.017	3.89248e-22	FRMD4A	0
chr22-39281314-39284848	1.58173e-16	0.796309	0.33	0.039	2.19023e-11	RPL3	28033
chr16-70803470-70806233	2.58559e-25	0.795309	0.362	0.033	3.58027e-20	RP11-424M24.5	629
chr11-35138280-35147266	0.00749116	0.795152	0.508	0.232	1	CD44	0
chr19-10268186-10272469	3.81237e-07	0.795115	0.443	0.132	0.0527899	ICAM1	0
chr17-78168127-78175499	4.93447e-08	0.793581	0.4	0.093	0.00683276	TK1	0
chr3-52243591-52247676	4.846e-11	0.79345	0.405	0.097	6.71025e-06	PPM1M	0
chr17-21283417-21288939	0.000848021	0.793151	0.578	0.253	1	MAP2K3	0
chr6-30740995-30745100	2.98316e-06	0.79137	0.416	0.129	0.413078	FLOT1	0
chr5-132468821-132493402	0.195282	0.791089	0.714	0.426	1	IRF1	0
chr2-215748280-215750229	1.3866e-30	0.790764	0.335	0.017	1.92003e-25	LINC00607	0
chr7-47479135-47483258	9.68309e-16	0.790642	0.341	0.049	1.34082e-10	TNS3	0
chr19-41321558-41329381	0.00027333	0.788699	0.476	0.176	1	CCDC97	0
chr11-117999587-118008521	2.21261e-10	0.787292	0.422	0.108	3.0638e-05	IL10RA	0
chr20-23046486-23052027	4.15763e-08	0.787189	0.438	0.111	0.00575707	THBD	0
chr2-85412564-85416729	4.94978e-12	0.786444	0.384	0.077	6.85396e-07	CAPG	0
chr16-2535397-2538530	5.56593e-09	0.783904	0.405	0.102	0.000770715	PDPK1	0
chr17-8150379-8157478	0.000110066	0.783877	0.584	0.247	1	PER1	0
chr16-31351421-31353063	1.21417e-25	0.783763	0.319	0.02	1.68126e-20	ITGAX	2070
chr19-35906971-35909853	1.3186e-23	0.78336	0.314	0.02	1.82586e-18	TYROBP	0
chr17-76381117-76386838	0.000154853	0.783329	0.459	0.154	1	SPHK1	0
chr6-44063810-44068693	3.40244e-10	0.783167	0.395	0.073	4.71136e-05	RP5-1120P11.3	5219
chr7-39620458-39626621	9.10173e-08	0.782537	0.481	0.153	0.0126032	RALA	0
chr1-41738496-41743938	3.2396e-07	0.780848	0.405	0.104	0.0448588	HIVEP3	0
chr21-33400951-33405798	3.89023e-07	0.780766	0.395	0.095	0.053868	IFNGR2	0
chr5-1103587-1109360	2.07651e-13	0.780689	0.314	0.044	2.87535e-08	SLC12A7	0
chr10-133292971-133294926	1.02623e-23	0.780464	0.341	0.024	1.42102e-18	TUBGCP2	0
chr11-72717935-72724415	1.49367e-07	0.780016	0.449	0.132	0.0206829	ARAP1	0
chr1-19397442-19399908	6.6142e-23	0.779523	0.33	0.026	9.15868e-18	CAPZB	0
chr6-2874476-2878392	9.81615e-14	0.778924	0.411	0.079	1.35924e-08	SERPINB9P1	0
chr19-1101251-1107953	2.23655e-08	0.778343	0.524	0.163	0.00309695	GPX4	0
chr7-77425656-77429313	2.51229e-23	0.778268	0.357	0.03	3.47877e-18	RP5-899E9.1	212
chr19-1247843-1254621	0.000436227	0.77767	0.503	0.199	1	MIDN	0
chr16-31873138-31878665	0.000432122	0.777262	0.508	0.197	1	ZNF267	0
chr3-146539235-146545182	7.02929e-09	0.777126	0.427	0.119	0.000973346	PLSCR1	0
chr16-2512725-2521763	5.10667e-05	0.775595	0.427	0.154	1	AMDHD2	0
chr17-45221264-45232108	0.00179288	0.775144	0.524	0.214	1	FMNL1	0
chr16-1469561-1472046	3.23347e-24	0.7742	0.335	0.025	4.47738e-19	CLCN7	0
chr2-205698398-205701356	9.41578e-18	0.774099	0.324	0.03	1.3038e-12	NRP2	0
chr15-70140316-70143356	6.12435e-11	0.77371	0.378	0.066	8.48039e-06	TLE3	42139
chr19-51809723-51811978	7.97393e-21	0.772904	0.308	0.019	1.10415e-15	FPR3	0
chr17-42456337-42461122	1.92377e-13	0.772616	0.378	0.073	2.66385e-08	ATP6V0A1	0
chr14-61551220-61554408	4.59525e-19	0.77238	0.346	0.036	6.36304e-14	RP11-47I22.4	0
chr20-1893667-1898835	1.07985e-08	0.771624	0.346	0.076	0.00149526	SIRPA	0
chr5-170273584-170280544	3.73437e-09	0.771115	0.373	0.117	0.000517098	LCP2	0
chr14-35365018-35368989	2.97049e-12	0.771104	0.427	0.088	4.11323e-07	RP11-561B11.3	1389
chr11-62537347-62550144	0.0163021	0.770704	0.627	0.284	1	AHNAK	0
chr17-8954148-8956894	3.57521e-22	0.770331	0.351	0.038	4.95059e-17	PIK3R5	0
chr3-141302331-141304290	1.06937e-15	0.769684	0.303	0.038	1.48076e-10	PXYLP1	0
chr8-39950637-39952623	2.35708e-20	0.769301	0.324	0.036	3.26385e-15	IDO2	0
chr6-30812082-30814919	4.52634e-22	0.769187	0.346	0.033	6.26762e-17	LINC00243	0
chr8-21908762-21915901	2.89144e-08	0.76909	0.389	0.117	0.00400378	DOK2	0
chr9-33157907-33169500	0.031493	0.768845	0.692	0.344	1	B4GALT1	0
chr10-79283903-79288778	1.25997e-10	0.768263	0.427	0.109	1.74469e-05	ZMIZ1	0
chr7-601168-605429	4.23253e-11	0.768199	0.422	0.112	5.86079e-06	PRKAR1B	0
chr1-15175546-15179880	9.00495e-11	0.768015	0.341	0.05	1.24691e-05	TMEM51	0
chr11-61971138-61974182	1.8619e-09	0.767646	0.405	0.092	0.000257817	FTH1	3477
chr10-80452593-80462038	7.70652e-07	0.767353	0.503	0.182	0.106712	TSPAN14	0
chr15-63500282-63507366	0.00204141	0.766551	0.524	0.231	1	USP3	0
chr10-79148246-79152897	1.21347e-11	0.766528	0.395	0.073	1.68029e-06	ZMIZ1	0
chr14-21068379-21072615	2.93137e-08	0.765597	0.395	0.095	0.00405907	ARHGEF40	0
chr19-18414477-18421879	2.35727e-07	0.765203	0.432	0.116	0.0326412	SSBP4	0
chr19-2092064-2097769	1.18784e-05	0.765036	0.465	0.162	1	IZUMO4	0
chr15-45447876-45450459	1.01627e-16	0.763832	0.33	0.038	1.40723e-11	C15orf48	0
chr9-131273017-131279257	2.01909e-08	0.763562	0.416	0.107	0.00279583	FAM78A	0
chr5-151092635-151095974	1.44739e-06	0.763201	0.4	0.095	0.200421	TNIP1	0
chr10-72295696-72298841	1.92283e-10	0.762625	0.449	0.128	2.66255e-05	DDIT4	19659
chr17-78777852-78783411	1.10417e-09	0.762595	0.459	0.126	0.000152894	CYTH1	0
chr7-2298783-2301332	1.26126e-19	0.761859	0.314	0.028	1.74647e-14	SNX8	0
chr9-136643661-136647141	9.79873e-11	0.761458	0.319	0.05	1.35683e-05	EGFL7	11714
chr10-48604395-48607507	2.01548e-17	0.760546	0.324	0.034	2.79084e-12	ARHGAP22	0
chr10-97685264-97690552	3.31663e-07	0.760534	0.449	0.15	0.0459253	AVPI1	0
chr3-197956853-197961933	5.32543e-06	0.760111	0.459	0.156	0.737413	LMLN	0
chr12-124548523-124552747	9.33553e-10	0.759485	0.33	0.059	0.000129269	NCOR2	0
chr3-119570077-119572256	3.93329e-28	0.758849	0.324	0.019	5.44642e-23	ADPRH	7011
chr19-41296069-41300179	1.56313e-11	0.758574	0.335	0.061	2.16447e-06	HNRNPUL1	0
chr8-11887095-11889768	1.2935e-16	0.758427	0.286	0.025	1.79111e-11	CTSB	17646
chr11-45856931-45860190	2.85101e-13	0.757622	0.351	0.05	3.94779e-08	CRY2	0
chr6-33027706-33030240	7.83804e-21	0.756732	0.373	0.043	1.08533e-15	HLA-DOA	18093
chr17-19723890-19728594	7.1736e-11	0.756533	0.314	0.052	9.93329e-06	RP11-311F12.1	1461
chr7-28407475-28411714	3.81354e-05	0.755634	0.373	0.104	1	CREB5	0
chr1-161738502-161741888	9.574e-18	0.755369	0.351	0.047	1.32571e-12	DUSP12	7869
chr9-105063385-105067026	5.07596e-08	0.755356	0.405	0.097	0.00702868	RP11-217B7.3	71603
chr11-75349313-75353087	4.42027e-11	0.754343	0.395	0.082	6.12075e-06	ARRB1	0
chr5-172885603-172888242	1.44042e-16	0.754145	0.346	0.044	1.99455e-11	ERGIC1	0
chr10-69047385-69050037	4.08272e-17	0.753417	0.292	0.027	5.65334e-12	KIF1BP	3840
chr10-33332226-33337724	8.98406e-11	0.75341	0.346	0.074	1.24402e-05	NRP1	0
chr1-7939510-7943607	6.25524e-12	0.753105	0.395	0.08	8.66163e-07	TNFRSF9	0
chr15-38250944-38255000	1.51371e-06	0.752919	0.384	0.1	0.209603	SPRED1	0
chr1-234602626-234613919	0.0281503	0.752828	0.649	0.332	1	IRF2BP2	0
chr22-17241535-17244236	5.60761e-17	0.752014	0.308	0.029	7.76486e-12	CECR3	12622
chr2-28715835-28717936	5.77675e-12	0.751451	0.357	0.061	7.99907e-07	RNA5SP89	31751
chr20-1489324-1492264	2.35133e-18	0.750754	0.335	0.041	3.25589e-13	SIRPB2	0
chr18-76490517-76497289	7.13187e-07	0.749898	0.432	0.128	0.098755	ZNF516	0
chr12-54384421-54385793	2.62466e-22	0.749076	0.314	0.025	3.63436e-17	ZNF385A	0
chr20-47353860-47361429	0.000521369	0.748146	0.449	0.155	1	ZMYND8	0
chr18-55267895-55270027	1.01039e-27	0.748062	0.297	0.015	1.39909e-22	TCF4	0
chr3-129622434-129628519	2.6749e-05	0.747015	0.368	0.105	1	PLXND1	15615
chr3-39145777-39154831	0.322306	0.746707	0.638	0.327	1	CSRNP1	0
chr10-124289821-124291885	1.02231e-22	0.74633	0.314	0.021	1.41559e-17	OAT	105417
chr1-206767863-206774736	5.57254e-11	0.745272	0.351	0.065	7.7163e-06	IL10	0
chr10-45379238-45381636	9.2521e-23	0.745218	0.303	0.022	1.28114e-17	ALOX5	0
chr10-73912857-73917488	1.04252e-23	0.744916	0.335	0.029	1.44357e-18	PLAU	0
chr1-27630799-27635423	3.41065e-10	0.744781	0.335	0.061	4.72273e-05	FGR	0
chr19-47225690-47233406	0.0026577	0.743764	0.508	0.207	1	BBC3	0
chr9-93092718-93099500	0.0103961	0.743711	0.557	0.249	1	CARD19	0
chr7-98280529-98288838	0.000297121	0.743387	0.535	0.199	1	BRI3	0
chr10-102452577-102454411	6.64329e-20	0.743269	0.335	0.032	9.19896e-15	RPARP-AS1	0
chr3-122678185-122683509	9.11747e-06	0.743214	0.454	0.15	1	PARP14	0
chr22-30608902-30611467	2.24968e-15	0.741652	0.324	0.039	3.11513e-10	TCN2	0
chr1-203286112-203291649	0.00484858	0.741456	0.47	0.216	1	LINC01353	0
chr20-37269612-37271485	6.34849e-17	0.740324	0.357	0.041	8.79075e-12	GHRH	7776
chr10-30492947-30494915	1.07345e-13	0.74003	0.286	0.036	1.48641e-08	MAP3K8	31113
chr9-36153075-36155122	2.22162e-17	0.738828	0.303	0.024	3.07627e-12	GLIPR2	0
chr19-10401049-10406052	0.000238379	0.738518	0.416	0.135	1	CDC37	0
chr8-132893373-132896293	3.59983e-10	0.738469	0.303	0.045	4.98468e-05	TG	0
chr18-74495437-74501968	0.00530051	0.738406	0.476	0.194	1	CNDP2	0
chr10-7407398-7413251	6.65057e-08	0.738332	0.378	0.108	0.00920905	SFMBT2	0
chr21-43725503-43729843	7.13561e-08	0.736691	0.378	0.09	0.00988067	PDXK	0
chr5-172877416-172879633	1.29874e-20	0.73657	0.297	0.021	1.79837e-15	ERGIC1	0
chr17-8016091-8021186	4.86182e-10	0.736459	0.314	0.054	6.73217e-05	GUCY2D	0
chr19-12788369-12797313	0.0547411	0.734937	0.622	0.31	1	PRDX2	0
chr1-41726552-41729508	5.83752e-14	0.73456	0.324	0.05	8.08321e-09	HIVEP3	0
chr19-44867786-44870674	1.14163e-15	0.734173	0.286	0.027	1.58081e-10	NECTIN2	0
chr1-221097645-221099348	1.32153e-23	0.73398	0.297	0.018	1.82993e-18	HLX	212585
chr9-124216535-124219595	1.17959e-12	0.733481	0.292	0.049	1.63337e-07	NEK6	38010
chr1-30908315-30913532	2.76197e-11	0.732781	0.33	0.053	3.82449e-06	SDC3	0
chr1-169105383-169111582	8.67283e-06	0.73101	0.454	0.149	1	ATP1B1	0
chr10-75399185-75404789	1.18252e-08	0.729691	0.395	0.091	0.00163744	ZNF503	0
chr8-125429040-125437118	0.0946904	0.729476	0.589	0.28	1	TRIB1	0
chr20-50496414-50500332	2.73976e-09	0.728392	0.324	0.057	0.000379374	PTPN1	9988
chr2-85885318-85891176	3.69899e-06	0.728313	0.416	0.123	0.5122	ST3GAL5	0
chr19-11088892-11093571	0.000120736	0.727837	0.438	0.167	1	LDLR	0
chr9-27527383-27533705	0.000635463	0.727303	0.411	0.133	1	MOB3B	0
chr7-22722204-22724061	2.77586e-22	0.727024	0.292	0.021	3.84373e-17	IL6	1822
chr8-143544178-143550112	9.13662e-09	0.726695	0.405	0.113	0.00126515	ZC3H3	2724
chr2-16656269-16659068	1.06963e-22	0.725185	0.303	0.024	1.48112e-17	FAM49A	0
chr8-128048377-128051271	5.62002e-16	0.725021	0.319	0.034	7.78204e-11	PVT1	0
chr5-40484466-40487445	1.2808e-14	0.72476	0.314	0.048	1.77353e-09	TTC33	24887
chr14-71141149-71144352	2.85587e-10	0.72427	0.351	0.067	3.95452e-05	RP6-91H8.3	0
chr2-38128604-38131223	4.6482e-24	0.723601	0.281	0.015	6.43636e-19	AC009229.6	1413
chr19-13149388-13157516	0.0131173	0.722626	0.616	0.296	1	STX10	0
chr5-139657842-139662116	0.000239455	0.72249	0.308	0.077	1	CXXC5	0
chr12-49670522-49675444	6.0179e-10	0.722395	0.341	0.069	8.33299e-05	FMNL3	0
chr20-48822749-48828816	4.93399e-06	0.72232	0.411	0.121	0.68321	PREX1	0
chr17-8963540-8968337	6.00389e-14	0.721965	0.384	0.065	8.31358e-09	PIK3R5	0
chr5-170311445-170313710	2.23043e-16	0.721674	0.351	0.052	3.08848e-11	CTB-114C7.4	0
chr13-114128672-114133074	3.30696e-09	0.721345	0.411	0.097	0.000457915	RASA3	0
chr15-81301700-81305113	1.47405e-14	0.721093	0.324	0.047	2.04111e-09	IL16	0
chr22-38213116-38217023	5.32732e-13	0.720235	0.319	0.05	7.37673e-08	MAFF	0
chr22-35350149-35353706	8.29322e-11	0.719905	0.395	0.094	1.14836e-05	TOM1	2154
chr6-113630289-113633194	1.38203e-09	0.719889	0.368	0.082	0.00019137	RP11-367G18.1	0
chr9-87711758-87714103	1.81731e-12	0.719433	0.324	0.044	2.51643e-07	DAPK1	3124
chr12-111773310-111777978	3.20601e-07	0.719396	0.351	0.082	0.0443936	ALDH2	0
chr5-132494029-132501620	0.356409	0.719274	0.492	0.226	1	IRF1	3230
chr6-44332368-44334734	5.77564e-27	0.718664	0.324	0.017	7.99753e-22	RP11-444E17.6	0
chr17-36103098-36106847	3.40878e-19	0.718662	0.297	0.036	4.72014e-14	CCL4	0
chr3-129614764-129617418	3.75339e-12	0.718063	0.324	0.051	5.19731e-07	PLXND1	7945
chr16-11596787-11598984	1.89915e-16	0.717968	0.314	0.031	2.62975e-11	LITAF	0
chr1-168503827-168505379	1.75722e-20	0.7177	0.276	0.021	2.43323e-15	RP5-968D22.3	8141
chr8-11896838-11899289	2.36954e-24	0.717027	0.324	0.025	3.2811e-19	CTSB	27389
chr7-130892851-130906192	0.0112689	0.716582	0.459	0.203	1	AC016831.7	0
chr14-90274125-90277183	1.80173e-18	0.716116	0.324	0.039	2.49485e-13	NRDE2	0
chr1-28171207-28175496	2.10265e-17	0.715373	0.341	0.044	2.91154e-12	PTAFR	0
chr6-2852260-2855625	3.19668e-09	0.714457	0.389	0.089	0.000442644	SERPINB9P1	0
chr1-37471059-37482221	0.0668162	0.714129	0.659	0.318	1	ZC3H12A	0
chr3-55621930-55625073	4.43348e-13	0.714053	0.324	0.039	6.13904e-08	ERC2	0
chr19-49893965-49898339	1.65585e-06	0.713724	0.368	0.1	0.229286	IL4I1	0
chr6-157304737-157306617	4.80377e-19	0.713622	0.265	0.019	6.65179e-14	TMEM242	0
chr9-120440202-120442998	1.11092e-25	0.713532	0.265	0.014	1.53829e-20	CDK5RAP2	0
chr7-130908510-130919681	0.0342054	0.713369	0.514	0.247	1	AC016831.7	0
chr11-47253638-47255457	3.5777e-21	0.713156	0.276	0.017	4.95403e-16	NR1H3	0
chr19-2268903-2276625	0.000156847	0.712227	0.411	0.14	1	LLfos-48D6.2	0
chr1-229158066-229159318	1.37575e-23	0.711552	0.297	0.015	1.905e-18	RP5-1065P14.2	63160
chr18-5628344-5631019	4.10086e-16	0.710746	0.319	0.042	5.67846e-11	EPB41L3	0
chr5-170294911-170298976	6.92613e-12	0.71018	0.351	0.063	9.59061e-07	LCP2	0
chr1-3305832-3308443	6.23003e-23	0.709784	0.292	0.018	8.62673e-18	PRDM16	0
chr2-237690901-237698391	0.000282258	0.709622	0.514	0.208	1	LRRFIP1	0
chr1-223620187-223621950	2.16062e-27	0.709574	0.303	0.014	2.99181e-22	CAPN8	0
chr20-23115708-23117255	8.67238e-16	0.708998	0.303	0.035	1.20086e-10	LINC00656	7812
chr19-34999145-35001894	6.85049e-11	0.708708	0.389	0.082	9.48588e-06	GRAMD1A	0
chr10-125158414-125162103	2.34953e-10	0.708667	0.33	0.058	3.2534e-05	CTBP2	0
chr5-140629948-140633886	2.26799e-09	0.708612	0.351	0.078	0.000314049	CD14	0
chr1-9162646-9164993	4.14073e-09	0.708194	0.335	0.061	0.000573367	MIR34A	0
chr21-44352422-44355594	8.32343e-18	0.708031	0.303	0.028	1.15255e-12	TRPM2	0
chr20-31521251-31524206	1.96322e-20	0.707982	0.286	0.024	2.71847e-15	HM13	0
chr17-42286117-42290866	2.13167e-06	0.707512	0.384	0.11	0.295173	STAT5A	0
chr18-77111381-77115686	6.79711e-08	0.70747	0.373	0.089	0.00941196	MBP	0
chr3-183551911-183556382	4.62966e-10	0.707173	0.346	0.075	6.41069e-05	KLHL6	0
chr14-75614134-75615863	3.27609e-28	0.706471	0.314	0.016	4.5364e-23	FLVCR2	0
chr10-79066367-79072596	0.000300408	0.706378	0.389	0.125	1	ZMIZ1	0
chr5-78546318-78549708	5.10594e-18	0.706322	0.286	0.025	7.0702e-13	LHFPL2	0
chr11-1748020-1752376	7.89201e-13	0.70629	0.276	0.036	1.09281e-07	RP11-295K3.1	0
chr7-131102432-131111678	0.000351809	0.706095	0.497	0.215	1	MKLN1	0
chr15-70507589-70510260	3.05458e-08	0.705226	0.335	0.064	0.00422967	RP11-96C21.1	1660
chr1-9179436-9183020	1.7146e-18	0.704595	0.335	0.042	2.37421e-13	MIR34A	0
chr11-10897530-10901174	7.52834e-08	0.704411	0.357	0.084	0.0104245	CTD-2003C8.2	0
chr5-100899872-100905687	8.37123e-05	0.704213	0.454	0.19	1	ST8SIA4	0
chr12-111396680-111399887	9.34311e-10	0.703889	0.373	0.07	0.000129374	RP3-473L9.4	0
chr18-77127687-77134535	1.90639e-05	0.703867	0.427	0.132	1	MBP	0
chr12-124681131-124689033	0.00015149	0.703674	0.405	0.115	1	SCARB1	87822
chr12-6948865-6955184	2.63539e-11	0.703441	0.395	0.089	3.64922e-06	PTPN6	0
chr1-181086758-181093318	0.0348014	0.70336	0.497	0.209	1	IER5	0
chr15-85701791-85708895	6.23198e-06	0.703266	0.389	0.116	0.862943	AKAP13	0
chr17-14351355-14353515	7.35489e-20	0.702981	0.308	0.028	1.01843e-14	HS3ST3B1	1950
chr16-85135521-85137943	1.68938e-18	0.702681	0.314	0.032	2.33928e-13	RP11-442O1.4	0
chr21-34200219-34203342	4.89455e-17	0.702656	0.346	0.037	6.77748e-12	AP000320.7	0
chr19-51121272-51124893	1.15802e-18	0.701611	0.303	0.029	1.60352e-13	SIGLEC9	14
chr4-102734097-102736348	1.54661e-25	0.699844	0.319	0.025	2.1416e-20	MANBA	0
chr22-17771439-17775686	4.57931e-10	0.699114	0.319	0.063	6.34097e-05	BID	0
chr11-64204397-64209853	1.32738e-06	0.698972	0.33	0.085	0.183803	FERMT3	0
chr9-36148381-36152474	2.52769e-08	0.698851	0.341	0.077	0.00350009	GLIPR2	0
chr2-8534538-8538722	6.66116e-15	0.698603	0.276	0.035	9.22371e-10	AC011747.3	4869
chr1-234932705-234935021	2.14295e-20	0.698463	0.27	0.02	2.96734e-15	RP11-443B7.2	22209
chr15-60388751-60399288	0.0245628	0.698257	0.541	0.267	1	ANXA2	0
chr16-11611909-11614930	1.08778e-10	0.698088	0.314	0.062	1.50625e-05	LITAF	0
chr22-45225863-45228725	2.82784e-16	0.697773	0.286	0.024	3.91572e-11	KIAA0930	0
chr16-11603820-11605984	1.19338e-27	0.697757	0.319	0.016	1.65247e-22	LITAF	0
chr5-172450783-172456448	3.98896e-08	0.697389	0.378	0.089	0.00552351	SH3PXD2B	0
chr14-22847598-22849743	6.34254e-15	0.697096	0.314	0.029	8.78251e-10	MMP14	0
chr4-8197690-8202614	0.000887139	0.697096	0.373	0.11	1	SH3TC1	0
chr16-87821338-87840277	0.00175755	0.697	0.384	0.15	1	SLC7A5	0
chr2-106536670-106538475	1.36735e-18	0.696509	0.292	0.02	1.89337e-13	AC108868.5	0
chr1-219459421-219462504	1.97057e-21	0.695672	0.297	0.021	2.72865e-16	RP11-95P13.1	16778
chr10-5852143-5853592	4.11803e-28	0.69507	0.303	0.015	5.70224e-23	ANKRD16	8024
chr17-78645125-78647637	2.07607e-12	0.695055	0.276	0.033	2.87474e-07	CTD-2357A8.3	13067
chr7-151805183-151809367	1.55118e-14	0.694884	0.276	0.028	2.14792e-09	PRKAG2	0
chr1-28313797-28315679	1.24998e-16	0.694583	0.276	0.024	1.73085e-11	MED18	13322
chr1-15260400-15262065	4.08808e-13	0.693572	0.286	0.034	5.66076e-08	FHAD1	0
chr11-73380297-73386479	4.46092e-08	0.693557	0.303	0.067	0.00617703	RELT	0
chr8-130490817-130492161	7.53894e-14	0.693268	0.286	0.031	1.04392e-08	ASAP1	47156
chr22-38200774-38206445	2.23274e-06	0.693049	0.405	0.125	0.309168	PLA2G6	0
chr11-96154785-96157544	7.16583e-06	0.692264	0.351	0.076	0.992252	MAML2	0
chr3-130848900-130852477	4.47458e-08	0.691314	0.378	0.084	0.00619596	ATP2C1	0
chr1-150548502-150553169	0.000169465	0.691152	0.335	0.087	1	ADAMTSL4	0
chr13-44263714-44264840	9.64716e-31	0.690908	0.303	0.012	1.33584e-25	RP11-478K15.6	20521
chr12-111434237-111439011	1.03922e-12	0.690548	0.346	0.067	1.43901e-07	SH2B3	0
chr2-119282232-119284616	6.77451e-12	0.690461	0.324	0.053	9.38066e-07	STEAP3	16579
chr17-38747344-38753385	0.00079796	0.690228	0.427	0.157	1	PSMB3	0
chr17-59836967-59849434	0.545593	0.690198	0.649	0.371	1	VMP1	0
chr3-52195389-52199077	3.08024e-12	0.690137	0.357	0.073	4.2652e-07	ALAS1	0
chr11-69296497-69299343	5.66183e-05	0.689933	0.357	0.101	1	MYEOV	0
chr12-108689276-108692858	1.4011e-06	0.688711	0.4	0.106	0.194011	CORO1C	0
chr3-16509735-16515206	6.89387e-05	0.688566	0.4	0.139	1	RFTN1	0
chr1-234840785-234843647	6.04867e-16	0.688282	0.308	0.04	8.3756e-11	AL360294.1	80728
chr21-42078892-42081688	5.37912e-17	0.688271	0.281	0.022	7.44847e-12	UMODL1	0
chr5-160505865-160507960	1.90402e-14	0.688043	0.303	0.049	2.6365e-09	MIR3142HG	18438
chr17-36087925-36090905	5.11059e-10	0.687905	0.314	0.064	7.07663e-05	CCL3	0
chr3-10191348-10197121	0.00200763	0.687899	0.432	0.159	1	IRAK2	0
chr17-76497867-76502194	0.000299199	0.687824	0.411	0.143	1	RHBDF2	0
chr15-90033280-90036258	9.04755e-14	0.687814	0.324	0.045	1.25281e-08	ZNF710	0
chr11-61814166-61817352	1.19468e-07	0.687285	0.357	0.084	0.0165428	FADS2	0
chr17-76491524-76494510	1.30896e-06	0.686933	0.324	0.077	0.181252	RHBDF2	0
chr2-191010865-191015732	0.000155002	0.686788	0.449	0.145	1	STAT1	0
chr1-160705234-160709406	1.29e-11	0.686705	0.297	0.053	1.78626e-06	CD48	0
chr3-5185628-5190807	0.00169431	0.686672	0.427	0.169	1	EDEM1	0
chr21-46225099-46229979	1.01615e-05	0.686404	0.368	0.102	1	LSS	0
chr1-116567729-116572723	4.56396e-05	0.686261	0.395	0.134	1	CD58	0
chr18-3446415-3455126	0.423872	0.685949	0.541	0.283	1	TGIF1	0
chr16-57891954-57894467	1.77541e-13	0.685707	0.314	0.042	2.4584e-08	CNGB1	0
chr1-19448041-19449596	8.61166e-15	0.685358	0.324	0.04	1.19246e-09	CAPZB	0
chr10-30432741-30438767	0.0019478	0.685358	0.427	0.168	1	MAP3K8	0
chr14-105063117-105067757	8.95245e-09	0.685148	0.373	0.092	0.00123965	GPR132	0
chr8-133567276-133576404	0.214062	0.684983	0.503	0.258	1	ST3GAL1	0
chr17-65054384-65059077	0.000830722	0.684897	0.427	0.151	1	GNA13	0
chr3-188946513-188951379	1.4271e-05	0.684837	0.33	0.084	1	TPRG1	0
chr14-92649585-92654674	1.07073e-11	0.684268	0.335	0.079	1.48264e-06	RIN3	0
chr8-55988480-55992389	8.96698e-06	0.684103	0.368	0.102	1	LYN	0
chr3-138347196-138351520	1.87693e-11	0.683669	0.33	0.053	2.59899e-06	MRAS	0
chr12-14955900-14962433	3.95724e-06	0.682889	0.422	0.153	0.547958	ARHGDIB	0
chr14-69719106-69720202	2.52668e-14	0.682841	0.286	0.037	3.4987e-09	SUSD6	3963
chr9-131655304-131659060	2.18775e-07	0.68236	0.384	0.102	0.0302938	RAPGEF1	0
chr19-17946240-17953181	0.000171888	0.682212	0.346	0.101	1	KCNN1	0
chr20-37335639-37337902	2.82207e-12	0.681905	0.314	0.046	3.90772e-07	SRC	6782
chr6-15594873-15596506	2.10631e-25	0.681448	0.265	0.012	2.91661e-20	DTNBP1	0
chr6-109454161-109459610	6.07128e-09	0.678654	0.411	0.107	0.00084069	MICAL1	0
chr6-31585473-31589595	4.89914e-14	0.678596	0.281	0.037	6.78384e-09	LST1	0
chr14-69692963-69697552	4.8189e-11	0.678258	0.319	0.063	6.67274e-06	SUSD6	0
chr4-158169489-158172952	1.42247e-13	0.678055	0.308	0.037	1.9697e-08	FAM198B	0
chr16-11582156-11587824	7.45304e-08	0.67775	0.373	0.095	0.0103202	LITAF	0
chr2-42123282-42130454	1.04322e-08	0.677564	0.384	0.101	0.00144455	EML4	38895
chr13-99309937-99313832	7.95503e-13	0.677233	0.324	0.051	1.10153e-07	UBAC2	0
chr9-133475644-133479833	1.47789e-07	0.677155	0.341	0.078	0.0204644	SLC2A6	0
chr7-112203869-112207682	0.000153165	0.677065	0.438	0.165	1	ZNF277	0
chr2-68737289-68743526	8.87247e-10	0.676846	0.362	0.08	0.000122857	ARHGAP25	0
chr11-35035570-35037246	4.91801e-16	0.676435	0.324	0.036	6.80997e-11	PDHX	14978
chr7-74092343-74095397	6.33571e-08	0.676424	0.362	0.091	0.00877306	LIMK1	0
chr11-65571815-65578192	0.0370103	0.676172	0.449	0.201	1	EHBP1L1	0
chr1-153531946-153537156	0.00333845	0.675605	0.432	0.171	1	S100A6	0
chr14-22835998-22840815	3.63008e-08	0.675523	0.324	0.07	0.00502657	MMP14	0
chr7-74641916-74644167	5.25429e-18	0.675252	0.292	0.025	7.27562e-13	GTF2I	13499
chr10-133304823-133306238	8.0942e-20	0.675231	0.27	0.019	1.1208e-14	TUBGCP2	0
chr22-50537924-50543081	2.99924e-06	0.674905	0.503	0.171	0.415304	CTA-384D8.34	0
chr2-28389344-28397142	0.459688	0.674607	0.584	0.305	1	FOSL2	0
chr7-128937406-128941458	6.41016e-11	0.674179	0.351	0.067	8.87615e-06	IRF5	0
chr17-2395847-2402869	0.0596659	0.674057	0.541	0.259	1	MNT	0
chr11-44563946-44570985	0.0042865	0.673807	0.47	0.202	1	CD82	0
chr7-22561295-22567003	1.54e-05	0.673256	0.378	0.109	1	STEAP1B	0
chr15-68333754-68335816	5.17845e-16	0.672946	0.243	0.015	7.17061e-11	ITGA11	0
chr17-78324149-78326077	1.89809e-15	0.672335	0.303	0.032	2.62829e-10	AC061992.2	0
chr5-151250967-151256362	0.00170926	0.672234	0.443	0.174	1	GM2A	0
chr6-159116231-159118081	1.81395e-15	0.671894	0.286	0.029	2.51178e-10	RP11-13P5.1	177
chr11-118607335-118611463	0.000131427	0.671812	0.378	0.106	1	PHLDB1	0
chr10-113678733-113682763	0.000326563	0.671534	0.395	0.134	1	CASP7	0
chr6-167089503-167092160	1.5079e-15	0.671022	0.297	0.031	2.08798e-10	RP11-517H2.6	0
chr12-111443006-111446467	6.84147e-13	0.670391	0.303	0.063	9.47339e-08	SH2B3	0
chr20-32034298-32036351	1.29317e-15	0.670212	0.27	0.022	1.79066e-10	CCM2L	2117
chr1-209606824-209636948	0.377054	0.669951	0.584	0.268	1	LAMB3	0
chr12-53216267-53222833	0.0016734	0.669321	0.422	0.158	1	RARG	0
chr5-170330309-170335415	4.00626e-08	0.668526	0.373	0.115	0.00554747	LINC01366	0
chr11-65491074-65494984	1.35311e-05	0.668457	0.405	0.117	1	MALAT1	2777
chr10-112949468-112954142	8.73477e-06	0.668171	0.324	0.076	1	TCF7L2	0
chr5-173010534-173012165	2.40095e-24	0.667993	0.27	0.012	3.3246e-19	ATP6V0E1	0
chr11-2926545-2934185	0.00506826	0.667616	0.411	0.144	1	PHLDA2	0
chr9-120924515-120929812	0.00093064	0.667565	0.454	0.177	1	TRAF1	0
chr10-71805533-71807999	3.52314e-17	0.667548	0.254	0.018	4.8785e-12	CDH23	0
chr9-124279648-124283724	4.68772e-12	0.667153	0.249	0.023	6.49108e-07	NEK6	0
chr16-11627104-11630625	2.21241e-09	0.667034	0.308	0.051	0.000306353	LITAF	0
chr9-131634976-131637551	7.83926e-13	0.666998	0.33	0.053	1.0855e-07	RAPGEF1	0
chr6-159700385-159702263	2.36637e-11	0.666483	0.292	0.042	3.27672e-06	SOD2	0
chr8-26571019-26573915	2.27896e-11	0.666448	0.292	0.041	3.15568e-06	DPYSL2	0
chr2-60880406-60883765	0.000776073	0.666404	0.416	0.135	1	REL	0
chr2-10035793-10038042	2.74085e-10	0.666017	0.297	0.051	3.79525e-05	RP11-254F7.2	1049
chr1-161012999-161014717	2.0384e-07	0.665774	0.319	0.077	0.0282257	F11R	0
chr20-23125433-23127099	1.31046e-24	0.665619	0.297	0.017	1.81459e-19	LINC00656	0
chr11-47376046-47378907	7.07072e-19	0.66552	0.27	0.022	9.79082e-14	SPI1	0
chr5-177425431-177432511	0.00518338	0.665218	0.492	0.238	1	GRK6	0
chr22-50398790-50400697	1.33477e-25	0.665025	0.297	0.019	1.84825e-20	PPP6R2	0
chr1-18946834-18952792	0.000267005	0.664994	0.378	0.125	1	IFFO2	0
chr2-218331685-218333617	5.0038e-24	0.664837	0.276	0.015	6.92877e-19	PNKD	0
chr5-119353342-119364616	0.0374903	0.664548	0.432	0.186	1	TNFAIP8	0
chr2-216004313-216007169	3.02919e-06	0.664521	0.297	0.077	0.419452	MREG	0
chr2-113123677-113125964	3.02758e-13	0.664452	0.286	0.035	4.19229e-08	IL1RN	0
chr2-46547209-46548665	1.33793e-20	0.664407	0.292	0.022	1.85264e-15	RHOQ	0
chr4-184854573-184856839	7.33376e-12	0.663937	0.265	0.032	1.01551e-06	MIR3945HG	0
chr10-4120375-4122196	8.49709e-19	0.663141	0.254	0.015	1.17659e-13	RP11-433J20.1	31361
chr2-184596799-184600221	1.055e-14	0.662511	0.303	0.037	1.46086e-09	ZNF804A	0
chr4-140755449-140757661	2.24458e-06	0.661795	0.297	0.053	0.310806	TBC1D9	0
chr12-40223676-40227236	1.06591e-09	0.661571	0.319	0.05	0.000147596	LRRK2	0
chr10-17226900-17235825	0.00200275	0.661424	0.535	0.222	1	VIM	0
chr8-140541924-140545619	5.63523e-11	0.661079	0.265	0.044	7.8031e-06	AGO2	0
chr17-1606106-1608377	1.68879e-10	0.661045	0.303	0.051	2.33846e-05	SLC43A2	0
chr11-1849905-1851622	4.5897e-14	0.661011	0.33	0.053	6.35536e-09	LSP1	1347
chr12-6334987-6342697	0.00552222	0.660932	0.497	0.208	1	TNFRSF1A	0
chr3-15290480-15293640	3.93732e-09	0.660831	0.281	0.046	0.000545201	SH3BP5	0
chr8-11857068-11859393	8.51396e-23	0.660618	0.259	0.015	1.17893e-17	CTSB	0
chr8-27387611-27391329	2.60389e-17	0.660226	0.27	0.024	3.60561e-12	PTK2B	0
chr16-19130437-19133238	2.76324e-14	0.66015	0.276	0.033	3.82626e-09	CTD-2349B8.1	0
chr17-64984316-64986882	3.10224e-10	0.660045	0.362	0.098	4.29567e-05	GNA13	23832
chr10-80201450-80206308	0.000269159	0.659376	0.378	0.129	1	ANXA11	0
chr3-158711674-158714505	5.31131e-14	0.659359	0.286	0.031	7.35456e-09	RARRES1	0
chr1-156487601-156493446	3.13495e-07	0.659012	0.314	0.075	0.0434096	MEF2D	0
chr6-137223391-137225353	7.24041e-17	0.658588	0.265	0.022	1.00258e-11	IFNGR1	3941
chr17-74519905-74522287	1.23714e-15	0.658558	0.249	0.027	1.71306e-10	CD300LB	0
chr3-107985405-107990118	9.78388e-08	0.658472	0.368	0.085	0.0135477	CD47	53179
chr17-67992470-67997106	2.20822e-05	0.658358	0.373	0.106	1	C17orf58	0
chr10-11162741-11171970	9.60729e-08	0.658247	0.476	0.152	0.0133032	CELF2	0
chr2-144659318-144661591	6.4851e-09	0.658032	0.341	0.075	0.000897992	TEX41	6375
chr17-59372019-59374334	5.21468e-15	0.657733	0.265	0.027	7.22076e-10	YPEL2	0
chr9-91419036-91426566	0.0262064	0.657523	0.465	0.194	1	NFIL3	0
chr22-42396433-42398201	3.1568e-17	0.65721	0.265	0.02	4.37123e-12	NFAM1	0
chr17-4944055-4950688	0.00310938	0.657125	0.476	0.19	1	RNF167	0
chr10-96716306-96721414	6.83523e-11	0.657055	0.324	0.066	9.46474e-06	PIK3AP1	0
chr3-157087217-157091585	0.00277132	0.657027	0.411	0.157	1	LINC00881	0
chr1-151325128-151328583	0.000242929	0.656945	0.357	0.107	1	PI4KB	0
chr5-80125325-80127564	2.93615e-20	0.656633	0.292	0.028	4.06569e-15	SERINC5	0
chr19-1087249-1089200	2.07795e-20	0.656361	0.292	0.027	2.87734e-15	POLR2E	0
chr1-161505050-161507308	8.52575e-14	0.656085	0.281	0.025	1.18056e-08	FCGR2A	0
chr2-60515486-60516920	1.91317e-18	0.656078	0.303	0.033	2.64917e-13	BCL11A	0
chr20-50189772-50197481	0.000830277	0.655756	0.378	0.134	1	CEBPB	0
chr3-49344955-49348075	1.21272e-09	0.655534	0.292	0.042	0.000167925	USP4	4242
chr19-40748337-40753438	0.00295778	0.655124	0.438	0.18	1	SNRPA	0
chr3-4738462-4742422	7.57893e-06	0.655053	0.346	0.093	1	ITPR1	0
chr6-81749031-81754525	0.000306347	0.654855	0.357	0.124	1	FAM46A	0
chr4-184896633-184900551	4.5445e-12	0.654738	0.265	0.044	6.29277e-07	LINC01093	0
chr2-84904534-84909487	0.00164696	0.654229	0.389	0.15	1	TMSB10	0
chr16-11325534-11329363	6.53871e-11	0.654225	0.303	0.053	9.05415e-06	RMI2	0
chr6-159691019-159694736	4.232e-06	0.654166	0.416	0.121	0.586005	SOD2	0
chr13-110470300-110472640	6.25882e-23	0.65412	0.259	0.015	8.66659e-18	COL4A2	0
chr8-38804837-38808545	3.95298e-16	0.65338	0.292	0.039	5.47369e-11	TACC1	0
chr1-206579589-206584284	2.2403e-07	0.652746	0.373	0.111	0.0310215	RASSF5	0
chr1-8873339-8881032	0.167268	0.652745	0.47	0.233	1	ENO1	0
chr8-133281263-133298701	0.139258	0.65192	0.546	0.293	1	NDRG1	0
chr5-72597623-72601165	1.28409e-11	0.651814	0.286	0.046	1.77808e-06	CTC-347C20.2	0
chr19-33297465-33303755	0.000123661	0.651725	0.346	0.103	1	CEBPA	0
chr14-69725396-69729202	4.51335e-09	0.651437	0.341	0.065	0.000624964	SRSF5	0
chr4-26160619-26164098	7.51785e-19	0.651045	0.249	0.019	1.041e-13	RBPJ	0
chr19-13829157-13844947	0.988165	0.651013	0.6	0.343	1	ZSWIM4	0
chr12-108825446-108827475	3.01836e-16	0.650902	0.292	0.032	4.17952e-11	SSH1	0
chr11-65290473-65292777	1.47583e-16	0.650842	0.265	0.025	2.04359e-11	POLA2	0
chr14-61101813-61104723	2.50602e-10	0.650798	0.335	0.051	3.47009e-05	SLC38A6	18079
chr2-142873208-142876153	2.12901e-07	0.650446	0.319	0.068	0.0294804	KYNU	1344
chr10-45418633-45421873	1.11386e-10	0.65024	0.292	0.046	1.54236e-05	ALOX5	0
chr19-16583789-16590518	1.50734e-05	0.650226	0.405	0.159	1	MED26	0
chr14-64653836-64655443	2.48011e-11	0.649905	0.286	0.043	3.43421e-06	PLEKHG3	48658
chr12-52005640-52008163	1.61051e-08	0.649887	0.314	0.061	0.00223007	GRASP	0
chr8-1744687-1747217	2.07279e-08	0.649887	0.373	0.083	0.00287019	CLN8	8560
chr6-32966645-32975245	0.69571	0.649585	0.546	0.31	1	BRD2	0
chr4-10018519-10024777	0.000107051	0.649038	0.395	0.134	1	SLC2A9	0
chr5-40677963-40682999	0.00169335	0.648479	0.422	0.174	1	PTGER4	0
chr1-19450438-19452903	3.27199e-11	0.648324	0.303	0.043	4.53073e-06	CAPZB	0
chr7-2607009-2609542	1.33125e-20	0.647967	0.281	0.02	1.84338e-15	IQCE	0
chr7-120987537-120990187	1.19191e-13	0.647575	0.292	0.048	1.65044e-08	CPED1	0
chr10-119516269-119518420	1.32571e-16	0.6475	0.308	0.041	1.83571e-11	RGS10	0
chr19-46529299-46531031	2.16624e-16	0.647318	0.292	0.032	2.99959e-11	PPP5D1	0
chr2-113238800-113242094	0.00108821	0.646914	0.384	0.123	1	PAX8	0
chr21-39003828-39005664	1.03868e-16	0.646744	0.297	0.031	1.43827e-11	AF064858.8	0
chr17-7237106-7243618	0.0131893	0.646704	0.422	0.176	1	PHF23	0
chr5-78525774-78528394	2.71917e-11	0.64646	0.286	0.043	3.76524e-06	LHFPL2	0
chr4-3384242-3389822	0.0284872	0.64631	0.357	0.124	1	RGS12	0
chr11-67370720-67375068	5.62351e-05	0.646	0.319	0.087	1	AP003419.11	0
chr11-117985588-117990234	0.00332447	0.645689	0.378	0.133	1	IL10RA	0
chr6-5670437-5673481	8.1633e-10	0.645505	0.27	0.037	0.000113037	FARS2	0
chr5-35855435-35859818	3.64413e-06	0.645406	0.303	0.072	0.504603	IL7R	0
chr1-10250870-10254268	4.91371e-20	0.645375	0.303	0.031	6.80401e-15	KIF1B	0
chr3-194485102-194490516	0.00122687	0.644673	0.411	0.162	1	ATP13A3	0
chr13-32425809-32429528	0.000966183	0.644008	0.438	0.158	1	N4BP2L1	0
chr22-24399977-24403311	2.99795e-07	0.643962	0.341	0.073	0.0415127	SPECC1L	0
chr2-68831612-68833120	2.1535e-11	0.643802	0.276	0.045	2.98196e-06	AC097495.3	0
chr17-78313615-78318162	0.000798354	0.643725	0.384	0.112	1	AC061992.2	0
chr10-50621686-50625986	0.0119686	0.642985	0.416	0.167	1	SGMS1	0
chr16-10936638-10943336	0.00240568	0.642871	0.351	0.121	1	DEXI	0
chr18-48990294-48994647	8.07021e-06	0.642809	0.308	0.067	1	RP11-1058N17.1	26352
chr4-158161301-158163116	9.13409e-18	0.642707	0.276	0.023	1.2648e-12	FAM198B	0
chr15-45454010-45459196	0.0027965	0.642687	0.416	0.149	1	C15orf48	5248
chr14-76827655-76829450	3.73089e-27	0.642603	0.259	0.009	5.16616e-22	LRRC74A	0
chr12-94171525-94175053	5.50572e-16	0.642368	0.297	0.031	7.62377e-11	PLXNC1	0
chr3-195900175-195902239	2.12408e-19	0.642255	0.265	0.018	2.94121e-14	TNK2	0
chr1-15415668-15418170	0.00115316	0.642171	0.324	0.101	1	EFHD2	0
chr6-108621028-108623311	1.30993e-12	0.642139	0.265	0.034	1.81386e-07	FOXO3	0
chr2-174630572-174636092	3.84411e-10	0.641968	0.314	0.067	5.32294e-05	WIPF1	0
chr1-27862802-27864904	6.13004e-05	0.641886	0.276	0.062	1	THEMIS2	7638
chr15-79965718-79968694	6.00599e-15	0.64155	0.297	0.032	8.31649e-10	BCL2A1	0
chr3-72100039-72102760	3.27928e-09	0.641284	0.292	0.048	0.000454082	LINC00877	0
chr8-39939247-39944548	0.00392649	0.64117	0.405	0.139	1	IDO2	0
chr19-18167975-18172003	3.94881e-14	0.641097	0.292	0.034	5.46792e-09	AC007192.4	0
chr7-30167966-30173965	0.000142036	0.640714	0.395	0.126	1	AC007036.6	2421
chr1-154998937-155008820	0.0189647	0.640513	0.497	0.22	1	ZBTB7B	0
chr9-125631265-125633567	3.74889e-12	0.640284	0.276	0.036	5.19109e-07	MAPKAP1	0
chr3-15294343-15296034	2.28749e-18	0.640059	0.276	0.019	3.16749e-13	SH3BP5	0
chr1-109615696-109617945	1.23664e-13	0.640041	0.308	0.046	1.71237e-08	AMPD2	0
chr14-102774308-102781282	0.00157378	0.640008	0.405	0.149	1	TRAF3	0
chr2-96501315-96503457	1.26138e-11	0.63976	0.249	0.028	1.74664e-06	NEURL3	0
chr11-64266309-64272197	0.061364	0.639682	0.4	0.159	1	GPR137	0
chr1-228081351-228086243	0.000406456	0.639666	0.351	0.122	1	ARF1	0
chr19-44744532-44751573	7.35808e-05	0.639379	0.465	0.16	1	BCL3	0
chr6-137216109-137220251	0.000409839	0.639209	0.378	0.124	1	IFNGR1	0
chr1-119645747-119648784	2.04392e-06	0.639069	0.308	0.062	0.283022	ZNF697	0
chr1-11735430-11739151	0.000917827	0.638947	0.324	0.1	1	AGTRAP	0
chr6-122788856-122791333	2.20787e-11	0.638922	0.308	0.052	3.05724e-06	SMPDL3A	0
chr5-172757142-172758921	2.37537e-10	0.638764	0.319	0.056	3.28918e-05	DUSP1	9168
chr2-207162966-207167876	0.00206492	0.63874	0.476	0.19	1	KLF7	0
chr12-6181813-6184250	1.4858e-08	0.638128	0.265	0.044	0.00205739	CD9	15464
chr1-15947531-15954678	0.0552974	0.637718	0.465	0.227	1	ZBTB17	0
chr21-25559703-25564193	1.33974e-06	0.637497	0.341	0.09	0.185514	MIR155HG	0
chr1-203270755-203276194	6.9275e-07	0.637462	0.368	0.101	0.0959251	CHIT1	0
chr1-181133247-181137160	1.91972e-06	0.637335	0.303	0.067	0.265824	RP11-540K16.1	37323
chr9-34985253-34990827	0.0120724	0.637306	0.449	0.196	1	DNAJB5	0
chr17-82238074-82244896	3.10916e-06	0.637255	0.335	0.091	0.430525	SLC16A3	0
chr11-35029813-35032448	2.20876e-07	0.637246	0.308	0.069	0.0305847	PDHX	9221
chr10-80497436-80502487	0.000532248	0.637073	0.292	0.08	1	TSPAN14	0
chr7-151339462-151343371	1.45041e-05	0.636797	0.33	0.087	1	NUB1	0
chr5-143063136-143067347	2.32242e-14	0.636312	0.265	0.033	3.21585e-09	ARHGAP26	0
chr18-77054143-77057490	3.77194e-09	0.635807	0.319	0.068	0.0005223	MBP	0
chr5-132293054-132296019	0.00221672	0.63573	0.378	0.121	1	P4HA2	0
chr1-2544552-2549691	0.000138692	0.635468	0.449	0.157	1	RP3-395M20.12	0
chr1-28159372-28162216	7.84976e-20	0.635037	0.243	0.015	1.08696e-14	PTAFR	0
chr12-55726443-55731237	8.43793e-05	0.634922	0.4	0.128	1	CD63	0
chr11-47244387-47246162	2.1996e-20	0.634893	0.265	0.017	3.04579e-15	ACP2	0
chr21-42232388-42235374	4.2625e-05	0.634827	0.357	0.107	1	ABCG1	0
chr10-31706474-31708465	5.86201e-18	0.634472	0.276	0.028	8.11713e-13	RP11-472N13.3	0
chr5-151066875-151069331	9.12778e-16	0.634336	0.281	0.031	1.26392e-10	TNIP1	0
chr2-46540653-46545655	0.00143922	0.634187	0.351	0.124	1	RHOQ	0
chr9-129883906-129891273	0.442465	0.634185	0.53	0.287	1	FNBP1	0
chr2-121282444-121288629	7.71564e-10	0.634092	0.33	0.069	0.000106838	TFCP2L1	0
chr17-1094955-1096678	3.99992e-21	0.634051	0.254	0.019	5.5387e-16	ABR	0
chr1-31521968-31524877	1.16914e-18	0.633992	0.281	0.03	1.61891e-13	TINAGL1	51607
chr8-143947872-143954294	0.0881079	0.633629	0.514	0.22	1	PLEC	0
chr8-29653864-29656947	2.39845e-07	0.633346	0.341	0.073	0.0332113	LINC00589	16974
chr2-234425363-234428046	1.80946e-15	0.633187	0.308	0.036	2.50556e-10	AC097713.3	10281
chr6-136593145-136594823	1.81862e-09	0.633182	0.297	0.06	0.000251824	MAP3K5	0
chr3-48555933-48561793	0.0697723	0.632968	0.411	0.171	1	PFKFB4	0
chr3-172200871-172202459	1.04667e-14	0.632697	0.276	0.033	1.44932e-09	FNDC3B	0
chr2-239464759-239466499	2.73606e-11	0.632549	0.297	0.046	3.78862e-06	HDAC4	63104
chr12-38903457-38907599	5.77784e-05	0.632383	0.4	0.111	1	CPNE8	0
chr4-74038176-74039806	6.14546e-11	0.632349	0.238	0.031	8.50962e-06	CXCL3	0
chr1-234974695-234977414	5.69144e-12	0.632181	0.265	0.039	7.88094e-07	RP11-443B7.3	2232
chr7-41809246-41810686	4.46138e-19	0.63201	0.27	0.017	6.17768e-14	INHBA	103411
chr18-9739447-9744120	2.91665e-08	0.631713	0.276	0.05	0.00403869	RAB31	0
chr11-9263245-9266027	1.17616e-08	0.631636	0.33	0.06	0.00162863	DENND5A	0
chr12-57770913-57773228	0.000122319	0.631624	0.341	0.103	1	METTL1	0
chr12-93569280-93574359	0.000813725	0.631331	0.405	0.14	1	SOCS2	0
chr11-93540969-93543952	2.62461e-06	0.630992	0.335	0.079	0.36343	SMCO4	0
chr17-47323299-47325526	3.44772e-09	0.630549	0.351	0.072	0.000477406	EFCAB13	0
chr16-88700100-88707620	0.0014088	0.630025	0.405	0.163	1	CTU2	0
chr2-234488140-234497846	0.000275454	0.629961	0.411	0.16	1	ARL4C	0
chr2-101305001-101310222	0.00026274	0.629738	0.405	0.156	1	RNF149	0
chr17-82227849-82233784	0.000281093	0.629434	0.314	0.096	1	SLC16A3	0
chr1-206469171-206473323	9.68331e-06	0.629298	0.362	0.116	1	IKBKE	0
chr20-35771259-35774011	0.00196798	0.629041	0.351	0.123	1	PHF20	0
chr8-141264090-141267173	1.00554e-11	0.628829	0.297	0.053	1.39238e-06	SLC45A4	0
chr1-203303348-203312932	0.000359993	0.628772	0.443	0.17	1	BTG2	0
chr4-153651070-153652941	4.52541e-12	0.628423	0.259	0.034	6.26633e-07	KIAA0922	14358
chr19-2774904-2776370	4.69086e-12	0.628247	0.259	0.03	6.49544e-07	SGTA	0
chr15-90868036-90874274	0.000704032	0.628123	0.4	0.127	1	FURIN	0
chr18-79398831-79408161	0.00042834	0.628049	0.357	0.124	1	NFATC1	0
chr1-160738387-160744939	1.86241e-08	0.627855	0.324	0.071	0.00257888	SLAMF7	0
chr7-26306539-26308975	1.00505e-09	0.627519	0.286	0.043	0.000139169	SNX10	0
chr9-87553924-87555576	6.15935e-19	0.627426	0.259	0.017	8.52886e-14	DAPK1	0
chr2-218369678-218371423	3.80681e-19	0.626953	0.243	0.014	5.27129e-14	CATIP	1578
chr17-1576879-1578141	4.54283e-11	0.626804	0.276	0.039	6.29046e-06	SLC43A2	0
chr19-3670124-3672712	6.61638e-12	0.625713	0.286	0.035	9.16171e-07	PIP5K1C	0
chr17-7557918-7562742	0.000134753	0.62564	0.351	0.108	1	TNFSF13	0
chr5-139646903-139654440	0.00234134	0.625302	0.422	0.136	1	CXXC5	0
chr2-28447925-28450604	2.01468e-08	0.62526	0.308	0.057	0.00278973	AC104695.4	0
chr4-81504404-81507302	5.96007e-11	0.625143	0.297	0.046	8.2529e-06	RASGEF1B	0
chr19-18477000-18481968	2.3429e-08	0.624859	0.308	0.062	0.00324421	ELL	0
chr2-55045857-55052377	0.244376	0.62468	0.481	0.234	1	RTN4	0
chr1-153944042-153947467	0.00109645	0.624639	0.335	0.111	1	DENND4B	0
chr13-40662540-40668698	0.00176082	0.624635	0.432	0.164	1	FOXO1	0
chr1-156100129-156107783	0.00337666	0.624279	0.454	0.197	1	LMNA	0
chr1-156160170-156163156	9.4641e-15	0.62419	0.297	0.037	1.31049e-09	SEMA4A	0
chr2-113103876-113105778	5.23031e-19	0.623953	0.303	0.029	7.24241e-14	IL1RN	1435
chr18-48936847-48953449	0.458028	0.62391	0.541	0.285	1	SMAD7	0
chr1-150610925-150614611	0.005359	0.623864	0.4	0.144	1	ENSA	0
chr4-6925196-6927486	6.50244e-17	0.623745	0.265	0.026	9.00393e-12	TBC1D14	0
chr2-207332436-207335779	0.00209136	0.623494	0.346	0.101	1	AC007879.6	61745
chr2-156331551-156336132	0.0332541	0.623272	0.492	0.218	1	NR4A2	0
chr6-6798283-6801359	3.17554e-15	0.623194	0.254	0.025	4.39718e-10	RP3-470L22.1	38991
chr5-180799172-180805608	0.00333318	0.623031	0.405	0.165	1	MGAT1	0
chr7-5418380-5430635	0.147066	0.622649	0.53	0.239	1	TNRC18	0
chr6-149480661-149485906	3.43632e-08	0.622341	0.395	0.12	0.00475828	ZC3H12D	0
chr1-235073211-235076442	0.0200367	0.622341	0.373	0.128	1	LINC01348	0
chr19-51819923-51822696	1.52854e-20	0.622321	0.243	0.014	2.11657e-15	FPR3	0
chr15-79002513-79005663	1.04699e-12	0.62231	0.265	0.03	1.44977e-07	RASGRF1	0
chr2-16663505-16666830	1.04817e-08	0.621929	0.297	0.053	0.00145139	FAM49A	0
chr19-2167333-2169697	1.14921e-05	0.621838	0.346	0.095	1	DOT1L	0
chr6-170048463-170050343	1.25466e-11	0.621489	0.27	0.029	1.73733e-06	RP11-302L19.3	128337
chr14-21254659-21259481	6.04396e-08	0.621463	0.292	0.059	0.00836907	HNRNPC	0
chr1-152034275-152038659	0.00183153	0.621249	0.368	0.124	1	S100A11	0
chr13-110463178-110464990	2.76104e-24	0.621073	0.254	0.013	3.82322e-19	COL4A2	0
chr19-51798875-51800849	9.82161e-10	0.620876	0.243	0.025	0.000136	FPR1	0
chr12-68559200-68560750	8.6119e-14	0.620857	0.238	0.018	1.19249e-08	RAP1B	50088
chr7-129143903-129148199	6.35195e-10	0.620794	0.292	0.059	8.79555e-05	TSPAN33	0
chr10-26737176-26740911	1.76349e-10	0.620641	0.335	0.077	2.44191e-05	PDSS1	0
chr4-25983782-25986787	4.71593e-19	0.620577	0.243	0.018	6.53015e-14	SMIM20	53907
chr2-152465944-152469726	2.29679e-10	0.620556	0.286	0.05	3.18037e-05	FMNL2	0
chr20-62602296-62604535	1.3762e-10	0.620516	0.33	0.071	1.90562e-05	WI2-87327B8.2	0
chr11-117979041-117980968	1.035e-11	0.620509	0.265	0.031	1.43316e-06	IL10RA	5379
chr16-11250037-11259633	0.0535026	0.62014	0.492	0.236	1	SOCS1	0
chr1-15257515-15259814	8.42049e-20	0.620015	0.254	0.018	1.16599e-14	FHAD1	0
chr2-28358361-28361556	6.29779e-12	0.61998	0.314	0.062	8.72055e-07	BRE	19459
chr15-33154130-33155443	1.29191e-16	0.619854	0.254	0.019	1.78891e-11	FMN1	0
chr12-104602595-104606228	0.000650901	0.619846	0.373	0.113	1	CHST11	0
chr1-16438675-16443160	1.72805e-08	0.619111	0.324	0.075	0.00239283	NECAP2	0
chr1-110507891-110508701	3.904e-24	0.618554	0.254	0.01	5.40587e-19	KCNA10	8515
chr11-104694201-104695369	2.45776e-29	0.618428	0.276	0.008	3.40326e-24	RP11-886D15.1	84879
chr9-5448997-5453964	0.000259194	0.618403	0.362	0.124	1	CD274	0
chr2-191675530-191680709	0.0161166	0.618234	0.422	0.185	1	NABP1	0
chr9-93107164-93110195	1.48289e-13	0.618031	0.276	0.037	2.05336e-08	CARD19	0
chr15-51621744-51623970	8.75993e-07	0.617868	0.297	0.056	0.121299	DMXL2	0
chr7-150448447-150452556	9.48634e-07	0.617716	0.297	0.073	0.131357	GIMAP8	0
chr3-12681215-12683094	5.89703e-11	0.617708	0.276	0.044	8.16561e-06	RAF1	16988
chr3-45064388-45065505	5.63206e-14	0.61754	0.276	0.03	7.79871e-09	CDCP1	16772
chr3-131360963-131362609	1.05126e-12	0.617343	0.303	0.039	1.45568e-07	RP11-933H2.4	0
chr17-1585799-1587639	1.50238e-14	0.617339	0.238	0.021	2.08035e-09	SLC43A2	0
chr7-50355663-50357689	1.50176e-15	0.617211	0.249	0.018	2.07949e-10	IKZF1	0
chr6-159715151-159717381	4.04419e-10	0.617088	0.303	0.055	5.59999e-05	SOD2	0
chr8-66784098-66786179	2.67289e-18	0.617082	0.254	0.017	3.70115e-13	SGK3	0
chr12-8948530-8952125	0.0424958	0.61677	0.324	0.146	1	M6PR	0
chr17-7011908-7016118	0.0279955	0.616639	0.422	0.187	1	RNASEK	0
chr11-107927840-107930265	1.42802e-10	0.616533	0.314	0.063	1.97739e-05	RAB39A	0
chr6-43916835-43918519	2.13553e-18	0.616274	0.222	0.011	2.95706e-13	RP11-344J7.2	64501
chr20-47316963-47320252	5.54303e-05	0.616229	0.314	0.073	1	ZMYND8	0
chr12-116536952-116540906	1.13995e-12	0.616125	0.276	0.04	1.5785e-07	LINC00173	433
chr11-17350874-17355083	4.7571e-06	0.61555	0.335	0.087	0.658716	NCR3LG1	0
chr11-105032466-105035967	2.27885e-07	0.615223	0.319	0.074	0.0315552	CASP1	0
chr2-152443697-152446404	3.53541e-05	0.615019	0.265	0.053	1	FMNL2	0
chr12-56683316-56690063	0.0893734	0.614969	0.454	0.211	1	PTGES3	0
chr2-101463266-101465176	6.28256e-16	0.614271	0.254	0.022	8.69946e-11	RFX8	0
chr6-43977295-43979620	4.72484e-12	0.61426	0.27	0.032	6.54249e-07	C6orf223	20959
chr4-74097488-74100148	6.71958e-05	0.614232	0.276	0.056	1	CXCL2	0
chr3-119557526-119560437	1.576e-13	0.614117	0.27	0.04	2.18229e-08	CD80	0
chr9-121285673-121290287	0.0384464	0.613928	0.389	0.147	1	GSN	0
chr21-38804164-38811850	0.0802895	0.613613	0.438	0.188	1	ETS2	0
chr22-45994770-45998148	2.39976e-14	0.613168	0.292	0.033	3.32295e-09	CITF22-92A6.1	15457
chr3-42012211-42016144	4.77636e-05	0.612868	0.297	0.091	1	TRAK1	0
chr2-46977089-46980163	1.075e-16	0.612755	0.292	0.03	1.48855e-11	TTC7A	0
chr1-153789606-153792381	2.66256e-08	0.612529	0.27	0.05	0.00368684	GATAD2B	0
chr7-139106934-139110649	1.30967e-05	0.612472	0.373	0.126	1	ZC3HAV1	0
chr2-207501103-207503713	5.92641e-18	0.612457	0.265	0.022	8.2063e-13	CREB1	26023
chr1-43521698-43523627	9.89504e-17	0.612349	0.303	0.032	1.37017e-11	PTPRF	1559
chr1-184416460-184420184	1.28728e-08	0.612228	0.281	0.037	0.0017825	C1orf21	0
chr17-14297147-14304265	0.220562	0.612118	0.47	0.224	1	HS3ST3B1	0
chr12-101875240-101879036	0.000537902	0.611684	0.335	0.101	1	DRAM1	0
chr16-27400520-27409165	0.000459549	0.611612	0.389	0.153	1	IL21R	0
chr7-151850501-151852323	3.06446e-11	0.611574	0.276	0.042	4.24335e-06	PRKAG2	0
chr2-108585255-108588744	1.12098e-13	0.611517	0.281	0.03	1.55222e-08	LIMS1	0
chr1-212484497-212486866	3.12223e-05	0.611397	0.297	0.06	1	RP11-61J19.2	16753
chr2-16652303-16655280	1.22283e-14	0.611226	0.259	0.027	1.69325e-09	FAM49A	0
chr16-72201912-72204195	1.66412e-13	0.611165	0.297	0.04	2.3043e-08	RP11-328J14.1	20369
chr3-170355789-170358970	0.000904652	0.611026	0.427	0.153	1	SKIL	0
chr5-67192658-67194546	2.04542e-17	0.610912	0.254	0.018	2.8323e-12	CD180	0
chr19-6736039-6741649	0.235894	0.610906	0.465	0.225	1	GPR108	0
chr3-119637611-119639988	1.31612e-07	0.610835	0.335	0.077	0.0182242	POPDC2	0
chr1-12142958-12144540	1.20869e-06	0.610829	0.292	0.051	0.167368	TNFRSF8	0
chr1-39816017-39818953	3.53832e-08	0.610781	0.319	0.067	0.00489952	TRIT1	22068
chr13-50121576-50131737	0.328019	0.610753	0.503	0.247	1	DLEU1	0
chr12-108312256-108314471	4.5602e-16	0.60992	0.254	0.018	6.31451e-11	CMKLR1	0
chr16-84599294-84602191	6.1409e-10	0.60983	0.292	0.06	8.5033e-05	COTL1	0
chr2-46521016-46521874	1.58761e-18	0.609485	0.249	0.016	2.19836e-13	ATP6V1E2	0
chr4-25993044-25995018	4.8146e-15	0.609359	0.227	0.018	6.66677e-10	SMIM20	63169
chr4-139175604-139179090	0.0332578	0.609353	0.416	0.156	1	ELF2	0
chr18-79393064-79397050	0.000332815	0.60932	0.395	0.115	1	NFATC1	0
chr1-160204081-160207318	1.47011e-06	0.609278	0.319	0.084	0.203567	PEA15	0
chr15-92068084-92071630	1.3583e-05	0.608946	0.324	0.074	1	SLCO3A1	0
chr3-183380177-183382848	7.17935e-12	0.608929	0.249	0.031	9.94124e-07	MCF2L2	0
chr18-13566427-13569512	5.07368e-07	0.608923	0.319	0.083	0.0702553	LDLRAD4	0
chr6-144149542-144154330	0.00106138	0.608898	0.373	0.143	1	STX11	0
chr7-47669046-47671128	1.30179e-15	0.608897	0.259	0.029	1.80259e-10	C7orf65	7397
chr14-68788587-68797338	0.650389	0.608858	0.584	0.314	1	ZFP36L1	0
chr1-151055637-151060724	0.00492184	0.607345	0.378	0.151	1	CDC42SE1	0
chr6-106163149-106165087	4.30653e-06	0.607272	0.292	0.08	0.596326	ATG5	0
chr15-74956039-74959355	0.000107242	0.60726	0.281	0.072	1	RPP25	0
chr17-78337065-78340655	7.02536e-07	0.60722	0.324	0.068	0.0972802	AC061992.2	0
chr6-146543088-146547114	0.000193719	0.607113	0.276	0.069	1	RAB32	0
chr11-914688-915671	1.10306e-28	0.607099	0.243	0.008	1.52741e-23	CHID1	0
chr17-28716770-28721189	0.00830727	0.606984	0.4	0.165	1	RAB34	0
chr17-8857764-8860026	2.04171e-20	0.606883	0.27	0.021	2.82715e-15	PIK3R6	0
chr3-129603022-129609003	0.000154264	0.606573	0.33	0.081	1	PLXND1	0
chr19-45467061-45479515	0.982003	0.606273	0.557	0.327	1	FOSB	0
chr1-155989117-155991776	1.05667e-13	0.606251	0.281	0.037	1.46317e-08	ARHGEF2	0
chr7-143378757-143386787	0.011597	0.606239	0.422	0.173	1	ZYX	0
chr1-206000546-206004026	3.29052e-05	0.605832	0.357	0.091	1	RAB7B	0
chr1-152046528-152050153	0.0214187	0.605706	0.411	0.16	1	S100A11	0
chr9-27368707-27371915	8.47459e-15	0.605657	0.265	0.034	1.17348e-09	MOB3B	0
chr15-59368911-59373451	0.00148767	0.605445	0.33	0.098	1	MYO1E	0
chr4-158208962-158211635	2.43547e-08	0.605386	0.259	0.042	0.0033724	TMEM144	0
chr17-4709512-4713431	0.00146867	0.605192	0.4	0.152	1	ARRB2	0
chr2-217901779-217906245	6.11726e-10	0.605118	0.27	0.041	8.47056e-05	TNS1	0
chr13-48158065-48162324	0.0047077	0.605011	0.308	0.091	1	MED4	62933
chr9-27351611-27354498	4.62592e-22	0.604928	0.243	0.015	6.40551e-17	MOB3B	0
chr19-39397020-39399197	1.77354e-05	0.604916	0.357	0.097	1	MED29	0
chr12-122077973-122082952	0.000168654	0.6049	0.405	0.124	1	MLXIP	0
chr19-10729463-10732248	4.39949e-13	0.604597	0.286	0.047	6.09198e-08	DNM2	0
chr8-133149822-133151053	1.44134e-20	0.604536	0.259	0.017	1.99583e-15	TG	14918
chr15-70094643-70102460	0.414655	0.604146	0.465	0.23	1	TLE3	0
chr12-64608204-64612608	0.00144055	0.604015	0.384	0.15	1	RASSF3	0
chr15-44710060-44717264	0.000772599	0.603923	0.47	0.188	1	B2M	0
chr22-35409818-35411578	1.94793e-15	0.603582	0.281	0.031	2.69729e-10	MCM5	0
chr10-102673729-102676677	4.84289e-11	0.602977	0.286	0.043	6.70596e-06	ARL3	0
chr8-130283707-130285204	1.5599e-17	0.602892	0.254	0.026	2.16e-12	ASAP1	0
chr3-5138261-5140810	3.14796e-07	0.602824	0.259	0.054	0.0435899	ARL8B	0
chr18-3593066-3597135	0.00966936	0.60275	0.443	0.196	1	DLGAP1	0
chr22-25563246-25565680	4.65354e-07	0.602703	0.303	0.059	0.0644376	GRK3	0
chr10-6070535-6073347	6.92734e-13	0.60254	0.265	0.039	9.59229e-08	IL2RA	8209
chr12-94674802-94679195	2.27688e-08	0.602515	0.314	0.062	0.0031528	TMCC3	24239
chr16-15589060-15593651	1.07932e-07	0.602452	0.357	0.111	0.0149454	C16orf45	0
chr1-26274649-26282205	0.0595523	0.602427	0.459	0.214	1	CEP85	0
chr5-80406843-80408963	0.000657878	0.602387	0.341	0.11	1	ZFYVE16	0
chr5-151257029-151259520	2.17813e-10	0.60228	0.314	0.058	3.01606e-05	GM2A	0
chr2-156434649-156438438	0.0001897	0.602122	0.341	0.098	1	GPD2	0
chr10-100996361-101001896	0.00155714	0.602116	0.324	0.114	1	LZTS2	0
chr11-2480276-2482593	5.62446e-13	0.601885	0.243	0.023	7.78819e-08	KCNQ1	0
chr1-226001864-226003208	5.36202e-09	0.601719	0.249	0.046	0.000742479	SDE2	2532
chr10-133274632-133280318	0.000533627	0.601601	0.346	0.132	1	ADAM8	0
chr2-241842386-241844783	1.47865e-07	0.60144	0.259	0.051	0.0204748	AC114730.2	0
chr10-3886553-3888657	2.84434e-06	0.601288	0.297	0.076	0.393855	RP11-464C19.3	45861
chr9-19126067-19129198	3.90771e-09	0.601047	0.303	0.072	0.000541101	PLIN2	0
chr6-33140557-33142549	3.44516e-19	0.6008	0.232	0.009	4.77052e-14	COL11A2	20131
chr1-17635450-17637027	7.3608e-14	0.600785	0.238	0.02	1.01925e-08	ARHGEF10L	0
chr2-191665145-191667255	1.81264e-14	0.600317	0.238	0.023	2.50996e-09	NABP1	10812
chr22-37606870-37611602	0.0120822	0.600245	0.416	0.175	1	GGA1	0
chr9-121277515-121280359	1.99339e-07	0.600125	0.297	0.061	0.0276024	GSN	0
chr17-43777943-43780559	2.46504e-08	0.600123	0.335	0.071	0.00341335	DUSP3	0
chr10-3467011-3469783	0.000226022	0.600039	0.286	0.075	1	RP11-482E14.1	17110
chr4-105144723-105148358	1.0605e-05	0.599882	0.357	0.105	1	TET2	0
chr20-45998101-46001005	2.11551e-14	0.599673	0.27	0.029	2.92934e-09	MMP9	7902
chr2-230666329-230669802	0.000142405	0.599636	0.33	0.092	1	AC098823.3	21118
chr3-11287895-11292068	0.00058464	0.599565	0.346	0.104	1	ATG7	0
chr17-64496039-64508293	0.274935	0.598829	0.627	0.336	1	DDX5	0
chr12-26121658-26126947	0.00405634	0.598643	0.357	0.113	1	BHLHE41	0
chr5-76401622-76405294	8.74258e-07	0.598266	0.373	0.113	0.121059	IQGAP2	0
chr12-124908762-124911946	0.000231001	0.597965	0.308	0.095	1	UBC	0
chr16-30758841-30763108	0.00329094	0.597893	0.341	0.121	1	RNF40	0
chr4-687056-690014	8.46111e-07	0.597558	0.254	0.045	0.117161	MFSD7	0
chr3-119627382-119629544	7.02865e-12	0.597534	0.281	0.038	9.73256e-07	PLA1A	0
chr20-50224256-50225380	2.01731e-16	0.597515	0.249	0.019	2.79337e-11	CEBPB	31566
chr11-69442015-69445529	8.63464e-07	0.597371	0.297	0.058	0.119564	AP000439.2	0
chr4-40720915-40723105	1.58581e-17	0.597319	0.249	0.018	2.19587e-12	NSUN7	26791
chr19-18288984-18295226	0.00268207	0.597257	0.395	0.156	1	JUND	7361
chr1-160095616-160099930	0.0373804	0.597208	0.33	0.136	1	IGSF8	0
chr2-64858662-64863559	9.12279e-05	0.597146	0.297	0.078	1	AC007880.1	0
chr12-49055753-49061653	0.00937948	0.597099	0.362	0.142	1	KMT2D	0
chr1-236159520-236161604	3.19466e-12	0.596776	0.259	0.034	4.42364e-07	GPR137B	0
chr1-150161970-150164577	9.22885e-11	0.596697	0.254	0.036	1.27792e-05	PLEKHO1	0
chr12-1811553-1813396	1.1213e-10	0.596469	0.243	0.029	1.55267e-05	CACNA2D4	0
chr18-12306753-12310359	0.00198784	0.596436	0.341	0.084	1	TUBB6	0
chr6-30780907-30783051	6.41637e-07	0.596231	0.276	0.046	0.0888475	HCG20	0
chr1-66370329-66375295	1.99916e-07	0.59565	0.308	0.07	0.0276824	PDE4B	0
chr9-134371475-134373659	1.37792e-10	0.595614	0.254	0.036	1.908e-05	RXRA	0
chr14-104676500-104678780	0.00119592	0.595482	0.286	0.082	1	RP11-982M15.6	2365
chr14-69042694-69044192	2.32721e-15	0.595478	0.238	0.021	3.22248e-10	DCAF5	6688
chr12-51911151-51912895	1.70505e-15	0.595276	0.249	0.02	2.36099e-10	ACVRL1	0
chr10-102641717-102649636	0.214724	0.595033	0.492	0.245	1	TRIM8	0
chr19-43667715-43670932	0.0689673	0.594837	0.438	0.173	1	PLAUR	0
chr14-69610383-69616651	0.0368833	0.594813	0.4	0.172	1	SUSD6	0
chr1-234774672-234782965	1.66459e-08	0.59457	0.265	0.047	0.00230496	AL360294.1	14615
chr11-102926441-102927933	1.13541e-23	0.594529	0.254	0.012	1.5722e-18	MMP13	15061
chr17-29148358-29150726	1.58847e-08	0.594504	0.324	0.074	0.00219955	MYO18A	0
chr21-34885071-34891769	0.17644	0.594427	0.4	0.178	1	RUNX1	0
chr4-40196587-40202838	5.00226e-06	0.594272	0.351	0.112	0.692663	RHOH	0
chr14-75425704-75430119	5.97324e-06	0.594266	0.297	0.07	0.827115	JDP2	0
chr4-102759675-102761810	0.00265906	0.594245	0.33	0.109	1	MANBA	0
chr13-36343777-36347273	0.000415647	0.594112	0.297	0.084	1	SPG20	0
chr7-157370620-157378615	5.01871e-08	0.593955	0.265	0.063	0.0069494	DNAJB6	0
chr10-80483335-80488843	5.97173e-07	0.593873	0.308	0.077	0.0826906	TSPAN14	0
chr10-3803239-3808253	0.00372313	0.593635	0.373	0.137	1	KLF6	17957
chr9-89417466-89423156	3.52949e-05	0.593546	0.33	0.099	1	SEMA4D	0
chr19-947322-948413	1.35395e-14	0.593532	0.211	0.016	1.87482e-09	ARID3A	0
chr20-49934774-49939311	0.00148458	0.593489	0.319	0.099	1	RNF114	0
chr1-39925554-39928089	9.47131e-12	0.593388	0.222	0.025	1.31149e-06	MYCL	23297
chr14-24092723-24095944	0.00137821	0.59319	0.308	0.101	1	PCK2	0
chr2-233059582-233065003	0.000177952	0.592649	0.314	0.091	1	INPP5D	0
chr17-50146098-50152818	0.0856184	0.592578	0.4	0.176	1	PPP1R9B	0
chr6-3022164-3025882	0.000220008	0.592096	0.368	0.117	1	NQO2	0
chr10-79083478-79085744	3.01136e-13	0.591794	0.254	0.025	4.16983e-08	ZMIZ1	0
chr10-71768412-71774505	0.0362204	0.591655	0.362	0.159	1	C10orf54	0
chr9-136521119-136522838	3.05341e-17	0.591429	0.254	0.018	4.22806e-12	NOTCH1	0
chr17-28948293-28954274	0.0982764	0.591309	0.459	0.214	1	PHF12	0
chr1-17141060-17142282	2.32391e-16	0.591275	0.249	0.015	3.21792e-11	PADI2	21624
chr7-44976959-44983291	0.124568	0.591159	0.476	0.229	1	MYO1G	0
chr6-33017246-33019781	2.76118e-12	0.590873	0.286	0.034	3.82341e-07	HLA-DOA	7633
chr7-92830313-92837651	0.0828592	0.590867	0.465	0.22	1	CDK6	0
chr2-215899390-215901210	1.73811e-17	0.590774	0.232	0.015	2.40676e-12	AC122136.2	28871
chr15-74786609-74791071	3.19961e-05	0.590105	0.335	0.118	1	CSK	0
chr7-101856132-101857729	3.45582e-10	0.590005	0.324	0.068	4.78528e-05	CUX1	0
chr6-31734275-31741242	0.217114	0.589976	0.492	0.225	1	CLIC1	0
chr6-35718097-35720859	1.83566e-14	0.589522	0.286	0.027	2.54183e-09	FKBP5	0
chr17-64060169-64062032	2.09294e-16	0.589358	0.243	0.024	2.89809e-11	ERN1	0
chr3-153159373-153166859	0.513628	0.589299	0.476	0.248	1	RAP2B	0
chr2-239273380-239276970	9.53246e-06	0.589286	0.351	0.104	1	HDAC4	0
chr1-36148620-36152301	0.0413165	0.589231	0.427	0.191	1	TRAPPC3	0
chr20-47767930-47768969	9.56269e-15	0.588796	0.227	0.016	1.32415e-09	SULF2	0
chr4-184811836-184816246	0.00018149	0.588453	0.319	0.115	1	ACSL1	0
chr11-117823140-117825765	3.11375e-17	0.588248	0.265	0.025	4.31161e-12	FXYD2	0
chr15-89820721-89823895	0.0014354	0.588131	0.281	0.07	1	ANPEP	5319
chr1-32330904-32340142	0.0106053	0.587819	0.378	0.14	1	HDAC1	0
chr12-71754153-71756879	0.000713196	0.587558	0.384	0.141	1	RAB21	0
chr17-7434825-7438693	6.6615e-05	0.587391	0.378	0.132	1	TMEM102	0
chr6-44262423-44268567	0.00661754	0.58704	0.389	0.142	1	NFKBIE	0
chr10-97318032-97321827	0.00155665	0.58685	0.297	0.098	1	FRAT1	0
chr4-38855925-38858664	1.53766e-08	0.586752	0.297	0.059	0.0021292	TLR6	0
chr3-122002836-122005722	1.06565e-12	0.586721	0.249	0.028	1.47561e-07	ILDR1	0
chr14-54563957-54569871	0.00481385	0.58653	0.389	0.13	1	SAMD4A	0
chr18-79506599-79509664	7.61878e-16	0.586492	0.27	0.027	1.05497e-10	NFATC1	0
chr17-1782420-1784389	1.45882e-11	0.586492	0.265	0.026	2.02003e-06	SMYD4	0
chr8-138253425-138255867	3.974e-16	0.586112	0.216	0.011	5.5028e-11	FAM135B	0
chr13-112688014-112692033	0.00473344	0.586103	0.308	0.111	1	ATP11A	0
chr16-10876115-10881995	0.00353137	0.586057	0.389	0.146	1	CIITA	0
chr21-15060698-15066714	0.000721816	0.585999	0.373	0.121	1	NRIP1	0
chr3-45644819-45647719	2.44671e-13	0.585986	0.243	0.027	3.38796e-08	LIMD1	0
chr1-94720095-94721673	4.06427e-20	0.585783	0.249	0.013	5.6278e-15	SLC44A3	98668
chr5-95957860-95963161	0.196762	0.585752	0.443	0.209	1	ELL2	0
chr6-15244513-15250200	0.123558	0.585498	0.459	0.225	1	JARID2	0
chr16-11667821-11670974	4.31753e-08	0.585397	0.319	0.07	0.00597849	SNN	0
chr5-56813181-56817760	3.39369e-05	0.58532	0.427	0.139	1	MAP3K1	0
chr17-75402652-75407209	0.00879236	0.585301	0.378	0.135	1	GRB2	0
chr2-218395509-218402121	0.0125234	0.585273	0.459	0.192	1	CTDSP1	0
chr7-135167133-135172150	0.000305194	0.585134	0.4	0.142	1	C7orf49	0
chr2-152611615-152613585	3.32089e-16	0.58513	0.227	0.016	4.59844e-11	FMNL2	0
chr10-11175575-11180885	7.92892e-09	0.584893	0.373	0.117	0.00109792	CELF2	0
chr11-8826440-8830118	1.56598e-13	0.584849	0.232	0.016	2.16841e-08	ST5	0
chr7-41731414-41733432	5.17645e-19	0.584808	0.249	0.018	7.16783e-14	INHBA	25579
chr1-155974871-155980121	0.00146449	0.584635	0.314	0.104	1	ARHGEF2	0
chr1-40383478-40390694	2.63563e-07	0.584502	0.368	0.115	0.0364956	SMAP2	0
chr2-201156701-201158788	4.10838e-08	0.584383	0.314	0.058	0.00568887	CFLAR	0
chr14-76771589-76774158	6.33499e-11	0.584179	0.265	0.033	8.77207e-06	VASH1	0
chr2-136115192-136119786	1.30404e-05	0.584012	0.351	0.118	1	CXCR4	0
chr5-142221099-142224262	1.27253e-09	0.583485	0.281	0.055	0.000176207	NDFIP1	66655
chr7-22694607-22699350	0.000146485	0.583187	0.303	0.079	1	IL6	26533
chr4-55395146-55399542	0.0108672	0.582993	0.405	0.164	1	TMEM165	0
chr21-33198248-33200429	5.32045e-11	0.582892	0.297	0.044	7.36722e-06	LINC01548	27598
chr8-102978247-102980286	7.01744e-15	0.582886	0.292	0.029	9.71705e-10	KB-1507C5.4	0
chr22-37674834-37677840	0.00121205	0.582358	0.351	0.124	1	LGALS1	0
chr14-89302717-89306519	1.12889e-09	0.581675	0.259	0.037	0.000156317	FOXN3	0
chr8-9087694-9089596	8.3459e-06	0.581667	0.286	0.068	1	ERI1	0
chr9-35644400-35651219	0.00322708	0.581661	0.4	0.139	1	SIT1	0
chr3-98777951-98780271	2.21064e-06	0.581646	0.243	0.039	0.306107	ST3GAL6	0
chr9-111957868-111961257	0.000141853	0.581495	0.319	0.091	1	UGCG	22498
chr4-81468733-81473691	0.0275717	0.581458	0.411	0.178	1	RASGEF1B	0
chr11-10807286-10810166	0.00545729	0.581066	0.395	0.15	1	EIF4G2	0
chr9-93148587-93150635	2.31671e-15	0.580858	0.249	0.022	3.20795e-10	RP11-370F5.4	30
chr17-70167960-70170427	4.4208e-05	0.58075	0.276	0.064	1	KCNJ2	0
chr1-202159217-202163571	8.20264e-06	0.580677	0.249	0.067	1	PTPN7	0
chr16-4663531-4665845	4.33733e-06	0.580497	0.238	0.044	0.600591	MGRN1	0
chr7-28684656-28686707	8.51918e-05	0.580376	0.297	0.069	1	CREB5	0
chr11-9662176-9665111	1.66686e-06	0.580329	0.259	0.057	0.23081	SWAP70	0
chr9-107486739-107491469	0.0123039	0.580315	0.346	0.121	1	KLF4	0
chr7-2527415-2532277	0.127221	0.580297	0.335	0.14	1	LFNG	0
chr2-108593096-108595626	6.01392e-05	0.580214	0.259	0.067	1	LIMS1	0
chr1-231625809-231629632	5.20836e-05	0.580197	0.303	0.083	1	DISC1	0
chr2-200810107-200813249	0.00608496	0.580123	0.395	0.156	1	BZW1	0
chr7-66626588-66632213	0.0900021	0.580086	0.395	0.162	1	KCTD7	0
chr12-49233084-49235750	1.90722e-06	0.58008	0.303	0.072	0.264092	TUBA1C	0
chr2-237482452-237483799	3.84922e-22	0.57967	0.2	0.007	5.33002e-17	MLPH	1628
chr6-142942764-142948313	0.106741	0.579569	0.449	0.194	1	HIVEP2	0
chr11-120207916-120213283	0.000876271	0.579558	0.281	0.077	1	OAF	0
chr11-10436049-10437238	9.38999e-18	0.579554	0.238	0.016	1.30023e-12	AMPD3	0
chr7-2862592-2865592	3.82002e-07	0.579498	0.314	0.082	0.0528958	GNA12	18267
chr18-13562161-13563882	9.75973e-13	0.579498	0.265	0.04	1.35143e-07	LDLRAD4	0
chr10-48612259-48613453	6.5896e-20	0.579316	0.227	0.011	9.12462e-15	ARHGAP22	0
chr2-231360969-231363180	1.51242e-20	0.57925	0.227	0.017	2.09424e-15	ARMC9	0
chr19-47388639-47390241	6.27885e-20	0.57899	0.238	0.015	8.69432e-15	DHX34	5934
chr11-48107037-48110528	3.51985e-10	0.578846	0.286	0.05	4.87394e-05	PTPRJ	0
chr8-58396299-58398226	2.98856e-15	0.578668	0.232	0.019	4.13826e-10	UBXN2B	13037
chr8-144011421-144013654	7.35741e-10	0.578516	0.238	0.031	0.000101878	SPATC1	0
chr8-55972103-55974280	1.6126e-13	0.578278	0.238	0.028	2.23297e-08	LYN	0
chr19-45442641-45445024	0.000411525	0.57826	0.297	0.079	1	ERCC1	0
chr12-89348933-89355575	0.0350324	0.578219	0.4	0.173	1	DUSP6	0
chr8-47731335-47739360	0.0478823	0.578183	0.362	0.159	1	SPIDR	0
chr17-1713770-1718092	0.162877	0.578173	0.492	0.223	1	WDR81	0
chr4-78774337-78777610	0.000153011	0.577944	0.335	0.113	1	BMP2K	0
chr13-99431869-99435147	0.00529918	0.577884	0.368	0.142	1	UBAC2	45434
chr9-70562931-70564597	2.07733e-12	0.577636	0.265	0.038	2.87648e-07	TRPM3	0
chr6-2898106-2903722	5.71016e-06	0.577573	0.303	0.076	0.790686	SERPINB9	0
chr5-132455994-132460650	0.000455117	0.577467	0.362	0.111	1	C5orf56	0
chr3-46987009-46991165	7.95243e-08	0.577431	0.276	0.063	0.0110117	NBEAL2	0
chr1-159920868-159926726	0.489499	0.577156	0.508	0.245	1	TAGLN2	0
chr17-27244456-27245829	5.14851e-13	0.577153	0.249	0.033	7.12914e-08	RP11-663N22.1	2794
chr5-83472468-83474917	1.74773e-07	0.577058	0.249	0.045	0.0242008	VCAN	0
chr5-80253542-80258041	0.0158806	0.576719	0.389	0.156	1	SERINC5	0
chr11-47241509-47242524	1.84439e-23	0.576499	0.249	0.009	2.55393e-18	ACP2	0
chr8-26608217-26612101	3.21818e-08	0.576198	0.303	0.052	0.00445621	DPYSL2	0
chr15-81023312-81024900	9.4048e-17	0.575857	0.254	0.022	1.30228e-11	CFAP161	0
chr1-116497521-116499493	2.05635e-14	0.575829	0.259	0.026	2.84743e-09	RP5-1086K13.1	0
chr17-1642865-1646111	1.52682e-06	0.575693	0.265	0.05	0.211419	SCARF1	0
chr20-4811420-4816070	6.39336e-05	0.575675	0.308	0.097	1	RASSF2	0
chr17-27530933-27533254	7.14525e-18	0.575614	0.222	0.015	9.89402e-13	KSR1	0
chr9-75889599-75893536	0.00135901	0.575481	0.297	0.088	1	PCSK5	0
chr10-71860108-71861702	2.07248e-08	0.575454	0.259	0.046	0.00286977	PSAP	8732
chr3-49350891-49353421	1.84937e-08	0.575232	0.243	0.036	0.00256082	GPX1	3754
chr1-206555284-206560718	5.77182e-07	0.574976	0.33	0.101	0.0799224	RASSF5	0
chr6-11769220-11773392	0.0506859	0.574829	0.357	0.134	1	ADTRP	0
chr2-236871211-236872427	4.00074e-09	0.574692	0.265	0.036	0.000553982	AC011286.1	116847
chr3-194132289-194142788	0.896143	0.574546	0.465	0.225	1	HES1	0
chr15-40102490-40109725	0.20433	0.574468	0.427	0.195	1	BMF	0
chr5-40684608-40689938	3.3503e-05	0.574309	0.324	0.079	1	TTC33	0
chr4-87005170-87010188	0.0137967	0.574308	0.416	0.178	1	AFF1	0
chr12-108628159-108636308	0.0737189	0.574237	0.432	0.2	1	SELPLG	0
chr14-54650093-54651048	3.53339e-17	0.574209	0.227	0.012	4.89269e-12	SAMD4A	0
chr8-102653488-102659140	0.369979	0.574129	0.454	0.255	1	KLF10	0
chr1-12152099-12153848	5.87254e-15	0.573895	0.259	0.029	8.13171e-10	TNFRSF8	7891
chr7-100368198-100369875	6.2936e-12	0.57389	0.27	0.032	8.71475e-07	PILRA	0
chr14-89364352-89367425	1.30666e-12	0.573887	0.265	0.034	1.80934e-07	FOXN3	0
chr14-90629581-90632032	1.12e-14	0.573625	0.243	0.025	1.55086e-09	TTC7B	0
chr12-62702266-62704067	5.4676e-13	0.573619	0.254	0.028	7.57099e-08	PPM1H	0
chr22-37631528-37635055	2.72559e-09	0.573328	0.292	0.062	0.000377412	GGA1	0
chr6-32850929-32856260	0.110321	0.573072	0.422	0.182	1	PSMB9	0
chr5-95817188-95819062	1.79134e-10	0.573072	0.27	0.042	2.48047e-05	RHOBTB3	0
chr6-29940559-29951151	0.253192	0.572879	0.443	0.212	1	HLA-A	0
chr19-54247640-54248797	3.22597e-13	0.572791	0.227	0.018	4.467e-08	RPS9	0
chr7-2507962-2513100	0.000459362	0.572334	0.297	0.083	1	LFNG	0
chr10-71597905-71599150	2.1246e-17	0.572231	0.232	0.019	2.94193e-12	CDH23	0
chr19-44721165-44722841	2.57912e-12	0.572228	0.211	0.017	3.57131e-07	CEACAM16	10450
chr22-31288494-31294060	0.00512519	0.572203	0.4	0.147	1	PIK3IP1	0
chr15-64881910-64884685	0.0240967	0.572153	0.346	0.117	1	AC069368.3	0
chr6-31493680-31499088	0.00955291	0.571995	0.378	0.156	1	MICB	0
chr19-49637661-49643924	0.348497	0.571687	0.519	0.267	1	RRAS	0
chr11-1781039-1783557	2.68835e-14	0.571676	0.238	0.02	3.72255e-09	AC068580.7	2650
chr3-141874409-141879300	0.039205	0.571608	0.395	0.173	1	ATP1B3	0
chr16-12458516-12460231	9.46225e-17	0.571397	0.259	0.022	1.31024e-11	SNX29	0
chr15-72226133-72232779	0.841071	0.571057	0.514	0.276	1	PKM	0
chr15-90883139-90886424	1.04782e-09	0.57095	0.276	0.046	0.000145092	FES	0
chr5-76546211-76549221	7.6923e-07	0.570833	0.276	0.076	0.106515	IQGAP2	0
chr10-133008933-133010810	3.33292e-13	0.570629	0.27	0.033	4.6151e-08	LINC01168	32578
chr5-115599449-115604124	4.74308e-07	0.570569	0.319	0.077	0.0656774	TICAM2	0
chr5-149680251-149681319	2.92715e-21	0.570525	0.238	0.014	4.05323e-16	ARHGEF37	45282
chr22-29305852-29311782	0.00632855	0.570518	0.33	0.114	1	GAS2L1	0
chr20-37287975-37290567	4.16089e-06	0.570505	0.297	0.065	0.576159	MANBAL	0
chr10-102814244-102816814	6.14257e-09	0.57032	0.216	0.028	0.000850562	WBP1L	0
chr7-30224376-30227230	7.71618e-05	0.569757	0.27	0.067	1	AC007036.6	45361
chr1-45542551-45545730	2.14002e-13	0.569603	0.286	0.044	2.96329e-08	AKR1A1	4812
chr6-44315449-44316931	4.33042e-16	0.569395	0.227	0.013	5.99633e-11	RP11-444E17.6	0
chr6-290372-293962	0.0922617	0.569329	0.384	0.172	1	DUSP22	0
chr20-46004111-46006703	1.07782e-08	0.569324	0.254	0.042	0.00149246	MMP9	2204
chr6-145813244-145816402	2.62475e-05	0.56926	0.33	0.104	1	FBXO30	0
chr12-110693775-110695108	1.10781e-14	0.569112	0.216	0.015	1.53399e-09	HVCN1	0
chr6-44000147-44003833	1.27925e-06	0.568954	0.286	0.063	0.177138	C6orf223	0
chr14-100371287-100378278	0.275873	0.568692	0.416	0.193	1	WARS	0
chr10-104349442-104354218	0.00198133	0.568195	0.378	0.139	1	CFAP58	0
chr11-73981681-73984188	0.000181457	0.568173	0.341	0.114	1	UCP2	0
chr19-6059651-6064712	3.04215e-08	0.568168	0.286	0.058	0.00421247	RFX2	0
chr19-6065597-6067841	1.11748e-09	0.568136	0.286	0.055	0.000154737	RFX2	0
chr5-177509370-177511471	4.63582e-16	0.568001	0.216	0.017	6.41922e-11	DOK3	0
chr6-134422534-134423464	3.0054e-15	0.567812	0.259	0.026	4.16157e-10	RP11-557H15.3	4775
chr10-12041421-12044368	0.00138572	0.567754	0.341	0.116	1	UPF2	0
chr11-57405444-57407023	1.64387e-15	0.567478	0.238	0.021	2.27627e-10	SLC43A3	0
chr12-49364869-49368546	0.00304925	0.567375	0.33	0.106	1	SPATS2	0
chr9-129173390-129178919	0.186073	0.567214	0.405	0.186	1	IER5L	0
chr1-155133386-155137566	0.0208433	0.567019	0.395	0.157	1	SLC50A1	0
chr10-46018756-46021609	1.30674e-13	0.566962	0.254	0.024	1.80944e-08	NCOA4	0
chr12-121534326-121539110	0.000229034	0.566919	0.357	0.122	1	KDM2B	0
chr4-140094176-140096841	4.76398e-09	0.5669	0.286	0.06	0.000659668	MAML3	0
chr17-7685358-7689054	0.0131921	0.56684	0.416	0.172	1	WRAP53	0
chr10-79352464-79356559	1.54262e-12	0.566751	0.243	0.029	2.13607e-07	PPIF	0
chr11-122654154-122657294	1.00772e-05	0.566694	0.324	0.09	1	UBASH3B	0
chr5-135391273-135394170	2.57935e-11	0.566663	0.227	0.021	3.57163e-06	H2AFY	0
chr4-40054330-40058626	0.0204917	0.566408	0.362	0.138	1	N4BP2	0
chr10-133257370-133260009	9.66464e-08	0.566097	0.324	0.079	0.0133826	RP13-49I15.6	0
chr19-17718748-17722284	5.31194e-07	0.565947	0.249	0.049	0.0735544	MAP1S	0
chr5-180813521-180816051	3.8241e-12	0.565854	0.232	0.024	5.29523e-07	MGAT1	0
chr1-173329555-173332493	1.61275e-12	0.565829	0.227	0.023	2.23317e-07	TNFSF4	122241
chr16-70784778-70785583	7.47431e-21	0.565648	0.211	0.011	1.03497e-15	VAC14	0
chr3-53168448-53171252	4.17797e-11	0.565629	0.243	0.026	5.78524e-06	PRKCD	0
chr19-14380187-14386019	0.00204199	0.565349	0.405	0.167	1	ADGRE5	0
chr20-32051141-32053411	1.16434e-11	0.565327	0.243	0.027	1.61226e-06	HCK	0
chr2-96140953-96149311	0.518085	0.565295	0.449	0.244	1	DUSP2	0
chr9-35489126-35492526	0.000444732	0.565261	0.243	0.056	1	RUSC2	0
chr7-151875025-151878051	0.000326476	0.565221	0.297	0.104	1	PRKAG2	0
chr4-105470809-105474589	0.00715066	0.565101	0.378	0.142	1	PPA2	0
chr20-19913303-19915991	1.72605e-08	0.564998	0.243	0.039	0.00239006	RIN2	0
chr15-78087780-78088799	1.04843e-13	0.564911	0.243	0.018	1.45177e-08	SH2D7	0
chr14-22789176-22791853	1.49601e-06	0.564786	0.243	0.042	0.207152	SLC7A7	0
chr5-172881518-172883416	7.17473e-09	0.564529	0.227	0.027	0.000993484	ERGIC1	0
chr10-92688728-92692128	0.000600467	0.564222	0.232	0.058	1	HHEX	0
chr20-832968-837305	0.0051449	0.564144	0.341	0.136	1	FAM110A	0
chr1-15151553-15157154	2.04791e-06	0.563826	0.368	0.101	0.283574	TMEM51	0
chr22-38217566-38221143	2.49851e-06	0.563747	0.297	0.074	0.345968	TMEM184B	0
chr3-121997275-121999299	6.5727e-12	0.56333	0.238	0.024	9.10121e-07	ILDR1	0
chr1-24742088-24747023	0.107468	0.563113	0.4	0.173	1	CLIC4	0
chr19-6056399-6058134	3.58382e-06	0.563088	0.27	0.065	0.496251	RFX2	0
chr2-113211049-113213003	3.31085e-09	0.562951	0.243	0.035	0.000458453	PAX8-AS1	0
chr19-45074891-45077597	2.56785e-06	0.56293	0.281	0.072	0.35557	ZNF296	0
chr7-100371802-100374221	2.16844e-15	0.562776	0.265	0.024	3.00264e-10	PILRA	0
chr1-19453853-19455790	1.4986e-21	0.562767	0.211	0.01	2.07511e-16	CAPZB	0
chr7-140058234-140063572	0.0228738	0.562293	0.357	0.144	1	PARP12	0
chr6-124961067-124965891	2.11716e-05	0.562077	0.27	0.052	1	RNF217	0
chr10-72353524-72355537	4.10662e-07	0.562024	0.314	0.076	0.0568644	DNAJB12	0
chr16-56605911-56612087	0.89821	0.561931	0.427	0.229	1	MT2A	0
chr20-49275447-49280220	0.847893	0.56183	0.4	0.22	1	ZNFX1	0
chr20-33992343-33996224	0.502246	0.561349	0.465	0.231	1	RALY	0
chr4-158816997-158819132	2.12496e-15	0.561267	0.254	0.019	2.94243e-10	FNIP2	0
chr10-61898993-61905318	0.00240398	0.561246	0.4	0.168	1	ARID5B	0
chr17-82214623-82218141	8.21974e-07	0.561099	0.319	0.079	0.113819	CCDC57	1792
chr2-43268088-43270557	3.31811e-14	0.561029	0.238	0.021	4.59458e-09	THADA	0
chr6-157760307-157765349	0.0175423	0.560961	0.443	0.193	1	SNX9	0
chr2-108636067-108637790	3.19141e-09	0.560752	0.265	0.045	0.000441915	LIMS1	0
chr16-17358831-17361305	3.01063e-09	0.560688	0.227	0.03	0.000416882	XYLT1	0
chr4-73867718-73870825	4.93622e-08	0.560652	0.281	0.05	0.00683519	CXCL1	0
chr1-10209629-10212599	0.00966412	0.560423	0.335	0.122	1	KIF1B	0
chr17-1205620-1206831	8.54294e-22	0.559917	0.222	0.012	1.18294e-16	ABR	0
chr7-1919476-1921021	1.13458e-17	0.559822	0.232	0.018	1.57106e-12	MAD1L1	0
chr11-12206355-12208112	2.17226e-12	0.559499	0.249	0.027	3.00793e-07	MICAL2	0
chr9-89661413-89663680	1.1788e-08	0.559459	0.238	0.036	0.00163228	UNQ6494	0
chr16-3258298-3260045	8.22637e-18	0.559212	0.249	0.016	1.13911e-12	MEFV	1670
chr12-57842586-57848057	0.00280018	0.559066	0.324	0.105	1	CTDSP2	0
chr20-1943285-1945879	6.21565e-08	0.558934	0.27	0.045	0.00860681	SIRPA	2692
chr13-41058208-41062937	0.245988	0.558554	0.454	0.198	1	WBP4	0
chr2-207768198-207771541	1.33413e-05	0.558376	0.319	0.099	1	FZD5	0
chr11-1760013-1761279	9.75824e-19	0.558367	0.227	0.017	1.35122e-13	CTSD	0
chr5-151078198-151084161	0.0483326	0.558313	0.405	0.184	1	TNIP1	0
chr2-33475248-33478581	0.00569439	0.558263	0.324	0.127	1	RASGRP3	0
chr17-49216899-49219985	7.18876e-10	0.55817	0.265	0.054	9.95427e-05	ABI3	0
chr3-52531020-52538174	0.360199	0.558004	0.384	0.17	1	NT5DC2	0
chr11-10454719-10457045	2.917e-06	0.557981	0.303	0.077	0.403918	AMPD3	0
chr16-31128518-31132404	4.51479e-06	0.55776	0.265	0.052	0.625162	PRSS8	0
chr6-116385016-116388115	3.35327e-08	0.55775	0.281	0.057	0.00464327	DSE	0
chr7-99378852-99381709	0.00466824	0.557642	0.427	0.16	1	ARPC1B	0
chr9-81686202-81691058	0.0294136	0.557571	0.368	0.135	1	TLE1	0
chr17-80294007-80294934	1.644e-26	0.557531	0.243	0.009	2.27644e-21	RNF213	0
chr13-110520412-110522374	1.96716e-18	0.557408	0.249	0.022	2.72393e-13	RAB20	691
chr19-14509506-14519176	0.53851	0.55713	0.438	0.244	1	DNAJB1	0
chr2-85436339-85438980	1.11748e-05	0.557079	0.286	0.063	1	SH2D6	0
chr5-150777686-150782465	0.000366136	0.556987	0.33	0.098	1	SMIM3	0
chr1-150148868-150153300	8.27907e-05	0.556985	0.308	0.092	1	PLEKHO1	0
chrX-150360924-150367363	0.00420721	0.556936	0.292	0.091	1	MAMLD1	0
chr12-120115013-120120071	0.0641998	0.55674	0.351	0.151	1	RAB35	0
chr16-10866021-10869163	3.74408e-13	0.556688	0.249	0.026	5.18442e-08	CIITA	0
chr1-113903691-113907244	0.293689	0.556682	0.384	0.186	1	AP4B1	0
chr22-39264280-39265531	1.331e-13	0.556574	0.227	0.022	1.84304e-08	PDGFB	19528
chr3-11271670-11274940	0.000130812	0.55649	0.303	0.084	1	ATG7	0
chr16-27326424-27327821	5.75779e-06	0.556282	0.232	0.046	0.797282	IL4R	0
chr11-67265933-67272970	7.76662e-06	0.556163	0.378	0.117	1	GRK2	0
chr15-99562834-99567823	0.0159727	0.556064	0.33	0.115	1	MEF2A	0
chr1-154418006-154424142	0.012811	0.555711	0.314	0.102	1	IL6R	0
chr2-8574138-8577371	3.88004e-07	0.555636	0.238	0.044	0.053727	AC011747.4	0
chr18-5515002-5516356	3.85148e-19	0.555591	0.227	0.012	5.33314e-14	EPB41L3	0
chr15-70503066-70506254	0.000267548	0.55556	0.303	0.087	1	RP11-96C21.1	0
chr5-174531638-174534395	7.00494e-06	0.555484	0.286	0.061	0.969974	LINC01411	0
chr10-58265837-58270064	0.0121558	0.555207	0.389	0.171	1	IPMK	0
chr18-62436615-62438617	5.8979e-05	0.555018	0.238	0.047	1	TNFRSF11A	45322
chr1-245054047-245055255	8.66436e-18	0.554995	0.243	0.018	1.19975e-12	EFCAB2	0
chr5-10759961-10762710	4.96345e-05	0.554959	0.303	0.081	1	DAP	0
chr5-150485332-150490640	0.00120058	0.554959	0.308	0.082	1	NDST1	0
chr4-102824468-102829783	0.505089	0.554876	0.541	0.319	1	UBE2D3	0
chr2-29112919-29118584	0.00160384	0.554834	0.33	0.121	1	CLIP4	0
chr12-26276846-26279421	1.49271e-15	0.554779	0.238	0.019	2.06695e-10	SSPN	0
chr12-47810262-47815613	0.00697352	0.554498	0.324	0.117	1	HDAC7	0
chr22-42437257-42440566	2.65354e-06	0.55438	0.276	0.069	0.367435	CTA-126B4.7	0
chr5-1479385-1481277	5.00708e-17	0.554351	0.259	0.023	6.93331e-12	LPCAT1	0
chr12-24902072-24904207	1.56255e-08	0.554319	0.249	0.038	0.00216367	BCAT1	0
chr12-94147555-94151206	9.87136e-06	0.554232	0.259	0.077	1	PLXNC1	0
chr19-4430638-4432392	9.01308e-12	0.55422	0.2	0.019	1.24804e-06	CHAF1A	0
chr19-47662714-47664836	1.6125e-07	0.554177	0.254	0.039	0.0223283	CTD-2571L23.8	0
chr3-183539743-183542313	1.11249e-14	0.554154	0.222	0.019	1.54047e-09	KLHL6	0
chr16-87463980-87466054	1.21643e-05	0.554077	0.27	0.058	1	ZCCHC14	0
chr15-70265613-70272090	6.43675e-05	0.554065	0.286	0.064	1	RP11-543G18.1	49485
chr2-46984462-46987998	6.22633e-05	0.553733	0.27	0.076	1	TTC7A	0
chr14-52312875-52316027	2.73882e-06	0.553686	0.286	0.063	0.379244	PTGER2	0
chr1-234655248-234659980	0.1216	0.553676	0.346	0.128	1	RP4-781K5.4	0
chr1-226108942-226111775	0.0535898	0.553606	0.259	0.081	1	RP11-396C23.2	18649
chr12-108332858-108334859	2.55124e-14	0.553587	0.243	0.025	3.5327e-09	CMKLR1	0
chr20-371739-374100	2.79016e-05	0.5535	0.238	0.05	1	TRIB3	0
chr4-173414576-173417762	8.48928e-09	0.553105	0.249	0.042	0.00117551	SCRG1	8195
chr16-85610181-85617372	0.114007	0.553017	0.422	0.166	1	GSE1	0
chr4-15001064-15006827	0.248853	0.552976	0.422	0.205	1	CPEB2	0
chr12-56631746-56637646	0.358374	0.552943	0.481	0.24	1	BAZ2A	0
chr14-21382893-21385791	0.014721	0.552841	0.357	0.143	1	SUPT16H	0
chr3-128803494-128807583	5.31153e-06	0.5526	0.259	0.067	0.735488	RAB7A	0
chr17-1197168-1199554	3.24379e-17	0.552349	0.265	0.029	4.49168e-12	ABR	0
chr7-140229117-140233467	0.000375179	0.552045	0.324	0.102	1	KDM7A	52081
chr19-56119052-56122248	0.00452047	0.551996	0.319	0.108	1	ZNF787	0
chr6-6591629-6593178	1.6787e-22	0.551761	0.243	0.016	2.3245e-17	LY86	0
chr3-141366115-141370823	0.0805278	0.551698	0.319	0.104	1	PXYLP1	0
chr17-62170218-62171955	1.17227e-08	0.551674	0.232	0.034	0.00162324	RP11-51L5.7	100531
chr6-116461181-116463033	2.98522e-12	0.551653	0.254	0.027	4.13363e-07	FAM26F	0
chr15-80998254-81002581	0.000328579	0.55159	0.346	0.111	1	MESDC1	0
chr10-70191623-70194794	1.6501e-11	0.551578	0.222	0.025	2.2849e-06	PPA1	8035
chr6-31729103-31730770	2.62151e-06	0.551191	0.281	0.065	0.363	DDAH2	0
chr9-107635990-107639699	7.28023e-06	0.550963	0.222	0.041	1	KLF4	145507
chr11-128902866-128906931	1.37629e-07	0.550906	0.286	0.059	0.0190575	C11orf45	0
chr16-31116310-31119216	0.00297998	0.550846	0.395	0.152	1	KAT8	0
chr15-90660012-90662266	1.28075e-05	0.550842	0.324	0.088	1	RP11-387D10.4	8908
chr9-5492964-5494661	2.66114e-11	0.550738	0.232	0.037	3.68488e-06	PDCD1LG2	15908
chr6-13271995-13274957	5.99524e-08	0.550696	0.227	0.04	0.00830161	PHACTR1	0
chr2-10042329-10044922	0.000212297	0.550582	0.351	0.119	1	KLF11	0
chr1-209672893-209676238	8.1782e-10	0.550579	0.259	0.042	0.000113244	G0S2	0
chr1-157141114-157145577	3.92345e-06	0.550539	0.265	0.049	0.543281	ETV3	2639
chr2-68857151-68858447	6.87739e-13	0.550391	0.232	0.022	9.52312e-08	BMP10	7033
chr2-43127095-43134846	0.326181	0.55015	0.389	0.186	1	AC093609.1	24403
chr3-156825436-156827414	0.000165582	0.55014	0.303	0.085	1	LEKR1	0
chr8-115449394-115452507	1.08818e-09	0.550125	0.27	0.048	0.00015068	TRPS1	0
chr6-108564113-108566380	4.95515e-08	0.550125	0.243	0.048	0.0068614	FOXO3	0
chr14-64501062-64511699	0.527039	0.550116	0.524	0.296	1	ZBTB25	0
chr3-129238618-129240984	7.56991e-09	0.550083	0.254	0.041	0.00104821	COPG1	8621
chr1-234969143-234972859	9.88092e-08	0.550062	0.292	0.067	0.0136821	RP11-443B7.1	0
chr8-28347094-28349243	3.66417e-08	0.549988	0.297	0.067	0.00507377	ZNF395	0
chr1-112393552-112394992	1.45981e-06	0.549904	0.276	0.054	0.202141	CTTNBP2NL	1188
chr1-111733199-111734316	5.80207e-17	0.549622	0.222	0.014	8.03413e-12	FAM212B	0
chr4-102560268-102565022	1.0829e-07	0.549595	0.265	0.048	0.0149949	NFKB1	0
chr2-69081193-69083897	1.18188e-08	0.549416	0.243	0.033	0.00163655	ANTXR1	0
chr10-27153618-27156987	0.0160092	0.549076	0.378	0.164	1	YME1L1	0
chr1-26541420-26543633	6.71236e-07	0.549001	0.319	0.078	0.0929461	RPS6KA1	0
chr17-58232456-58233902	4.91148e-13	0.548919	0.222	0.022	6.80093e-08	LPO	0
chr9-4982634-4989343	0.521696	0.548899	0.416	0.214	1	JAK2	0
chr9-87564058-87565444	4.25312e-19	0.548882	0.222	0.01	5.88929e-14	DAPK1	0
chr6-37005263-37008866	1.88415e-09	0.548599	0.281	0.055	0.000260899	FGD2	0
chr17-77284839-77289448	0.0279405	0.548566	0.362	0.116	1	SEPT9	0
chr9-105141394-105143404	5.18235e-18	0.548381	0.238	0.017	7.176e-13	SLC44A1	101217
chr2-20048371-20053303	0.0782098	0.548291	0.438	0.186	1	LAPTM4A	0
chr19-18276994-18283171	0.578126	0.548251	0.438	0.225	1	JUND	0
chr1-84995473-84999457	5.9798e-10	0.54824	0.292	0.058	8.28023e-05	MCOLN2	0
chr4-38075117-38076558	3.96791e-13	0.548068	0.259	0.027	5.49437e-08	TBC1D1	0
chr6-6856225-6859270	0.000510377	0.548057	0.286	0.09	1	RP3-429O6.1	41751
chr21-35932025-35933904	1.51908e-11	0.547981	0.232	0.025	2.10346e-06	RUNX1	0
chr20-49811835-49814763	0.00608366	0.54775	0.335	0.119	1	SLC9A8	0
chr17-16987921-16989817	7.46083e-08	0.547682	0.227	0.036	0.010331	AC104024.2	0
chr3-15267700-15270667	3.66512e-05	0.547659	0.303	0.089	1	SH3BP5	0
chr9-104925130-104928736	0.00659126	0.547639	0.314	0.098	1	ABCA1	0
chr9-77944556-77947233	9.27862e-15	0.547627	0.232	0.018	1.28481e-09	GNAQ	0
chr1-12177212-12181230	7.28576e-06	0.547621	0.335	0.102	1	TNFRSF1B	0
chr12-124452956-124455671	2.12973e-06	0.547609	0.265	0.07	0.294904	NCOR2	0
chr10-93378926-93380275	1.18291e-12	0.547605	0.249	0.029	1.63798e-07	MYOF	0
chr14-70884548-70889286	3.5632e-07	0.547537	0.265	0.066	0.0493396	RP1-292L20.3	17370
chr10-102801408-102803724	2.4744e-10	0.547507	0.259	0.032	3.4263e-05	WBP1L	0
chr7-30548710-30552257	5.60714e-07	0.547454	0.286	0.06	0.0776421	RP4-777O23.3	0
chr5-91279451-91282009	0.10701	0.54722	0.308	0.113	1	RP11-213H15.1	0
chr6-31812613-31816026	0.0760666	0.547117	0.319	0.131	1	HSPA1A	0
chr10-71850110-71852943	3.04299e-06	0.547021	0.286	0.069	0.421363	PSAP	0
chr3-172038906-172043083	0.000367036	0.546911	0.351	0.112	1	FNDC3B	0
chr17-68247085-68249909	0.00551002	0.5469	0.346	0.127	1	AMZ2	0
chr10-24721064-24725277	0.303208	0.546898	0.319	0.132	1	ARHGAP21	0
chr6-163412265-163417945	0.00563113	0.54682	0.395	0.14	1	QKI	0
chr5-135116016-135117247	4.47783e-15	0.546788	0.216	0.013	6.20044e-10	CTC-276P9.2	3278
chr5-172051738-172052870	7.18125e-21	0.546504	0.211	0.009	9.94388e-16	STK10	0
chr12-45725637-45731561	0.100449	0.546479	0.492	0.244	1	ARID2	0
chr7-129053913-129055726	0.0003251	0.546363	0.324	0.106	1	TNPO3	0
chr17-1588800-1591051	3.9417e-11	0.546146	0.249	0.034	5.45808e-06	SLC43A2	0
chr17-27293423-27297700	0.000829091	0.545977	0.335	0.111	1	WSB1	0
chr10-13712353-13713686	8.63413e-15	0.545763	0.232	0.021	1.19557e-09	FRMD4A	0
chr20-63685960-63688019	9.69032e-08	0.545705	0.227	0.041	0.0134182	RTEL1	0
chr7-4724512-4727018	0.000923711	0.545687	0.281	0.078	1	FOXK1	0
chr17-75313684-75314909	5.72253e-17	0.545373	0.216	0.015	7.92399e-12	GRB2	3166
chr20-47740098-47741336	1.91716e-15	0.545205	0.238	0.02	2.65469e-10	SULF2	0
chr1-206010909-206013476	2.09141e-06	0.5449	0.222	0.039	0.289598	CTSE	0
chr19-48779838-48781534	3.09536e-11	0.544846	0.227	0.023	4.28615e-06	BCAT2	13527
chr2-233079331-233085273	1.33812e-07	0.54478	0.286	0.078	0.0185289	INPP5D	0
chr8-55843459-55845954	4.91939e-07	0.544651	0.243	0.045	0.0681188	TGS1	18010
chr13-27167871-27172983	0.0541891	0.544373	0.384	0.156	1	USP12	0
chr12-124379667-124382848	2.40141e-05	0.544168	0.222	0.038	1	NCOR2	0
chr7-84194400-84196505	6.76809e-14	0.54409	0.227	0.022	9.37177e-09	SEMA3A	0
chr3-196284376-196288562	0.00315884	0.543979	0.324	0.101	1	PCYT1A	0
chr20-19973856-19979149	0.00288744	0.543946	0.276	0.078	1	RIN2	0
chr10-118792247-118794026	3.80499e-18	0.543782	0.232	0.017	5.26877e-13	CACUL1	36997
chr2-113111636-113113302	1.17867e-11	0.543668	0.243	0.029	1.6321e-06	IL1RN	0
chr16-10748955-10750278	5.74589e-17	0.543359	0.254	0.023	7.95633e-12	NUBP1	0
chr18-3012245-3017227	0.0142548	0.543265	0.281	0.104	1	LPIN2	0
chr11-68008634-68011089	1.43191e-08	0.54319	0.254	0.039	0.00198277	ALDH3B1	0
chr10-52755156-52757343	3.34877e-22	0.543182	0.238	0.011	4.63704e-17	MBL2	8036
chr15-64694781-64696213	2.77566e-21	0.542789	0.222	0.011	3.84345e-16	OAZ2	0
chr3-196631568-196634730	0.000190661	0.542626	0.292	0.092	1	NRROS	4955
chr20-53914262-53918119	0.00331584	0.542415	0.265	0.076	1	BCAS1	18657
chr6-20400240-20405122	0.264922	0.542399	0.443	0.233	1	E2F3	0
chr7-2757197-2761406	0.212333	0.542202	0.438	0.216	1	GNA12	0
chr15-90230650-90234835	0.0020953	0.54216	0.368	0.141	1	CIB1	0
chr5-42989120-42995819	0.342171	0.542036	0.357	0.165	1	CTD-2201E18.5	10913
chr19-2088766-2091527	0.000136535	0.541932	0.243	0.058	1	MOB3A	0
chr6-113653200-113654976	6.89845e-10	0.541904	0.259	0.036	9.55229e-05	RP11-367G18.1	3125
chr4-40575919-40577939	1.1573e-08	0.541782	0.276	0.053	0.00160252	RBM47	0
chr11-7512433-7514673	4.53374e-05	0.541663	0.276	0.075	1	PPFIBP2	0
chr5-17216053-17219349	1.51989e-06	0.541571	0.265	0.057	0.210458	BASP1	0
chr17-74569035-74570534	0.000572979	0.541363	0.281	0.077	1	CD300LD	8830
chr8-141205655-141207687	1.82817e-08	0.541309	0.243	0.041	0.00253147	SLC45A4	0
chr10-79467302-79468430	8.29745e-17	0.54125	0.227	0.018	1.14895e-11	ZCCHC24	21674
chr5-107364813-107366203	3.44643e-18	0.541248	0.2	0.009	4.77227e-13	EFNA5	10685
chr9-131697784-131698942	6.96972e-14	0.541141	0.243	0.025	9.65097e-09	RAPGEF1	0
chr4-139552366-139558069	0.0349156	0.541136	0.314	0.127	1	SETD7	0
chr1-19434990-19441716	2.4099e-06	0.541061	0.314	0.074	0.333698	CAPZB	0
chr16-11538577-11543154	2.48443e-11	0.541035	0.249	0.031	3.44019e-06	LITAF	4567
chr9-113219078-113222984	0.0116449	0.54101	0.368	0.144	1	FKBP15	0
chr6-4316716-4318744	9.67336e-10	0.540976	0.216	0.027	0.000133947	RP3-527G5.1	26998
chr15-90412188-90415205	1.49185e-06	0.540953	0.27	0.064	0.206577	IQGAP1	0
chr12-53298053-53300622	0.00019608	0.540912	0.281	0.076	1	PFDN5	0
chr5-78533122-78535082	4.26108e-17	0.540855	0.243	0.017	5.90032e-12	LHFPL2	0
chr10-132419910-132423341	8.30242e-11	0.54065	0.243	0.031	1.14964e-05	RP11-432J24.2	0
chr1-205210405-205212563	1.45492e-06	0.54065	0.276	0.07	0.201463	DSTYK	0
chr19-4811395-4813562	1.54355e-05	0.540209	0.249	0.053	1	TICAM1	2369
chr19-47330367-47332669	1.35524e-18	0.540127	0.249	0.018	1.87661e-13	C5AR2	0
chr19-18020138-18022784	1.14133e-09	0.539991	0.27	0.049	0.00015804	ARRDC2	6035
chr22-46853858-46854776	1.00887e-21	0.539938	0.232	0.011	1.39698e-16	TBC1D22A	0
chr6-159676776-159680285	6.10962e-13	0.539899	0.249	0.035	8.45998e-08	SOD2	0
chr15-72781666-72785990	0.00319612	0.539868	0.357	0.127	1	ADPGK	0
chr12-49704931-49708129	0.0182533	0.539868	0.351	0.129	1	FMNL3	0
chr10-62045337-62051610	0.0486642	0.53982	0.4	0.179	1	ARID5B	0
chr3-5121899-5126975	0.0147261	0.539652	0.324	0.117	1	ARL8B	0
chr19-43663911-43666155	5.30658e-15	0.53964	0.222	0.024	7.34801e-10	PLAUR	0
chr8-55883368-55886211	1.139e-13	0.53948	0.238	0.025	1.57717e-08	LYN	0
chr1-10377260-10378918	1.73377e-09	0.539404	0.2	0.021	0.000240075	KIF1B	0
chr8-143970042-143979152	0.0980464	0.539331	0.4	0.168	1	PLEC	0
chr10-5975481-5978415	0.000964172	0.539323	0.33	0.117	1	IL15RA	0
chr6-137790108-137793078	5.19638e-08	0.539312	0.243	0.05	0.00719543	RP11-95M15.1	26123
chr11-94127580-94132709	0.55198	0.539241	0.384	0.178	1	PANX1	0
chr11-118916562-118930895	0.00558434	0.539184	0.551	0.383	1	BCL9L	0
chr17-43168815-43172646	0.0302296	0.539154	0.4	0.172	1	BRCA1	0
chr8-133065995-133076822	0.0127539	0.539124	0.378	0.165	1	SLA	0
chr12-26359522-26360542	5.965e-20	0.539044	0.243	0.014	8.25974e-15	ITPR2	0
chr13-76884075-76887154	0.00662127	0.53902	0.297	0.088	1	KCTD12	0
chr4-11487774-11490525	3.86159e-15	0.539004	0.238	0.018	5.34714e-10	RP11-281P23.1	9577
chr20-5008625-5010479	1.22888e-13	0.538845	0.211	0.02	1.70163e-08	SLC23A2	0
chr9-129485762-129491870	0.00626944	0.538787	0.373	0.158	1	LINC00963	0
chr5-170291306-170294297	3.28347e-13	0.538697	0.243	0.033	4.54663e-08	LCP2	0
chr17-10062688-10064307	3.20873e-13	0.538565	0.211	0.019	4.44313e-08	GAS7	0
chr2-55165079-55166119	1.2064e-21	0.538514	0.222	0.011	1.6705e-16	CLHC1	8671
chr17-75875380-75879590	0.00228333	0.538368	0.346	0.117	1	TRIM47	0
chr7-111985793-111988176	1.07322e-14	0.538163	0.227	0.018	1.48609e-09	DOCK4	0
chr3-184174204-184177836	0.0102101	0.538158	0.357	0.133	1	AP2M1	0
chr14-75276552-75285117	0.560777	0.537864	0.503	0.275	1	FOS	0
chr1-151988088-151991239	0.00025495	0.537799	0.297	0.072	1	S100A10	0
chr10-79263216-79269095	0.00364283	0.537723	0.286	0.097	1	ZMIZ1	0
chr20-60054964-60058610	8.7822e-11	0.537639	0.238	0.03	1.21607e-05	C20orf197	0
chr11-57646023-57650513	2.03782e-05	0.537574	0.286	0.071	1	YPEL4	0
chr14-68945472-68953532	0.0132735	0.537436	0.314	0.101	1	ACTN1	0
chr7-2732270-2735474	1.16361e-13	0.537393	0.243	0.027	1.61125e-08	GNA12	0
chr2-85408208-85411442	5.19024e-08	0.537163	0.281	0.058	0.00718693	CAPG	0
chr1-64933103-64935014	1.69256e-07	0.537043	0.238	0.04	0.0234368	JAK1	0
chr21-44869676-44875782	0.508467	0.536914	0.335	0.145	1	PTTG1IP	0
chr3-171346865-171348107	3.50131e-12	0.536913	0.205	0.018	4.84826e-07	TNIK	0
chr19-4057504-4062308	0.000437018	0.536911	0.265	0.075	1	ZBTB7A	0
chr3-187773184-187774670	3.1794e-12	0.536889	0.222	0.021	4.40252e-07	RP11-30O15.1	21516
chr2-131104253-131107048	0.00604344	0.536777	0.335	0.116	1	PLEKHB2	0
chr20-5652735-5655226	5.03304e-09	0.536774	0.27	0.038	0.000696925	GPCPD1	41708
chr2-20617736-20618865	3.10378e-12	0.536761	0.216	0.02	4.29781e-07	HS1BP3	0
chr9-112072932-112075337	2.72399e-10	0.536693	0.232	0.03	3.77191e-05	SUSD1	0
chr17-17149888-17153166	6.31337e-06	0.536546	0.249	0.052	0.874212	MPRIP	0
chr3-196159788-196160846	3.94533e-17	0.536502	0.232	0.017	5.46309e-12	LINC00885	0
chr15-45197560-45201850	0.129255	0.536438	0.416	0.194	1	SHF	0
chr22-36327781-36335886	0.979648	0.536427	0.416	0.204	1	MYH9	0
chr5-179816721-179823336	0.133963	0.53628	0.4	0.179	1	SQSTM1	0
chr21-43602812-43604418	1.21915e-15	0.536201	0.232	0.019	1.68816e-10	HSF2BP	0
chr20-828919-830716	2.63967e-10	0.536182	0.216	0.022	3.65515e-05	FAM110A	2998
chr5-67181573-67182961	2.17789e-14	0.53607	0.232	0.018	3.01572e-09	CD180	0
chr2-42117873-42118861	1.69946e-12	0.535887	0.238	0.028	2.35324e-07	EML4	50488
chr14-54900433-54903602	0.000608622	0.535825	0.368	0.122	1	GCH1	0
chr1-15408894-15413200	0.065334	0.535812	0.276	0.124	1	EFHD2	0
chr7-101717098-101718954	1.0397e-05	0.535718	0.27	0.063	1	AC004953.1	78412
chr2-128513150-128514433	7.87123e-19	0.535672	0.216	0.012	1.08993e-13	AC012451.1	66057
chr13-110868799-110872490	0.00968618	0.53525	0.276	0.087	1	LINC00346	0
chr12-108729350-108732850	0.161077	0.534874	0.395	0.184	1	CORO1C	0
chr2-60796288-60797408	1.67013e-17	0.534811	0.216	0.016	2.31262e-12	PAPOLG	0
chr1-192806928-192810574	0.024651	0.534732	0.368	0.148	1	RGS2	0
chr4-38804035-38806279	3.34274e-08	0.534619	0.243	0.039	0.00462869	TLR1	0
chr16-11740327-11744194	0.0384312	0.534532	0.346	0.144	1	TXNDC11	0
chr16-56909729-56912288	9.09956e-14	0.534522	0.216	0.021	1.26002e-08	SLC12A3	0
chr1-201538238-201540921	1.5993e-07	0.534475	0.249	0.043	0.0221455	RP11-134G8.5	7763
chr1-1304359-1309778	0.45004	0.53442	0.341	0.144	1	PUSL1	0
chr4-143335517-143338600	0.0144383	0.534399	0.303	0.084	1	GAB1	0
chr19-3428130-3430287	1.8939e-12	0.534223	0.243	0.033	2.62248e-07	NFIC	0
chr3-23161411-23163478	9.68299e-10	0.534223	0.243	0.035	0.00013408	UBE2E2	39541
chr10-3850644-3853006	0.00139881	0.534129	0.335	0.111	1	RP11-464C19.2	15915
chr3-194586697-194589054	3.83711e-07	0.533954	0.227	0.029	0.0531325	TMEM44	0
chr3-71579560-71586933	0.153584	0.533775	0.308	0.113	1	FOXP1	0
chr3-129598832-129600392	3.29266e-11	0.533683	0.216	0.019	4.55934e-06	PLXND1	0
chr1-2554808-2557811	0.00347093	0.533423	0.297	0.095	1	TNFRSF14	0
chr10-93480548-93483443	1.46918e-05	0.533287	0.292	0.064	1	MYOF	0
chr11-112523307-112527326	2.92222e-07	0.53328	0.265	0.048	0.040464	RP11-65M17.3	0
chr8-23201633-23202477	1.40413e-19	0.533257	0.2	0.008	1.9443e-14	TNFRSF10A	0
chr2-218283930-218288177	0.0177473	0.533228	0.384	0.168	1	TMBIM1	0
chr9-110069515-110070394	5.10159e-11	0.533121	0.211	0.017	7.06418e-06	AKAP2	0
chr2-113217007-113218966	2.43011e-15	0.532978	0.205	0.015	3.36497e-10	PAX8	0
chr3-183536334-183538102	1.94193e-10	0.53285	0.216	0.024	2.68899e-05	KLHL6	0
chr9-91060254-91061816	6.01245e-10	0.532742	0.259	0.043	8.32544e-05	RP11-305L7.1	43140
chr19-42198626-42202957	8.78078e-06	0.532693	0.314	0.089	1	DEDD2	0
chr3-184747943-184748974	1.86958e-08	0.532586	0.222	0.032	0.0025888	RP11-329B9.5	4658
chr11-2268866-2271630	6.99921e-07	0.532504	0.265	0.055	0.0969181	ASCL2	0
chr19-3357385-3362234	2.32588e-05	0.532408	0.286	0.073	1	NFIC	0
chr17-50423650-50430247	0.179331	0.532397	0.297	0.119	1	ACSF2	0
chr17-76483526-76486220	6.87922e-10	0.532313	0.238	0.032	9.52566e-05	RHBDF2	0
chr8-42893153-42898767	0.207151	0.532306	0.373	0.176	1	HOOK3	0
chr17-78415747-78417477	6.62663e-13	0.532277	0.216	0.016	9.17589e-08	PGS1	0
chr17-72976406-72978445	6.43759e-17	0.532131	0.227	0.015	8.91414e-12	SLC39A11	0
chr2-69177139-69178806	1.69717e-08	0.53206	0.243	0.039	0.00235008	ANTXR1	0
chr12-108855620-108859711	0.00552435	0.532019	0.384	0.145	1	SSH1	0
chr5-132961375-132964399	2.04304e-05	0.531945	0.314	0.084	1	AFF4	0
chr12-113421770-113423543	1.11097e-07	0.531942	0.249	0.043	0.0153836	SDSL	0
chr19-6800376-6803542	3.11901e-08	0.53176	0.297	0.066	0.00431889	VAV1	0
chr1-3312804-3314798	3.9361e-13	0.531753	0.238	0.028	5.45032e-08	PRDM16	0
chr1-247406982-247408655	1.92722e-11	0.531753	0.216	0.027	2.66862e-06	NLRP3	7500
chr10-44967535-44969050	5.45501e-15	0.531728	0.227	0.02	7.55356e-10	RASSF4	0
chr15-83106718-83109267	2.24477e-09	0.531364	0.216	0.034	0.000310833	TM6SF1	0
chr19-44736570-44738081	1.14828e-12	0.531301	0.211	0.02	1.59002e-07	BCL3	9623
chr1-168081233-168082873	6.92477e-10	0.531074	0.227	0.03	9.58872e-05	GPR161	0
chr2-112793329-112796322	8.40613e-05	0.530761	0.27	0.068	1	IL1A	8738
chr10-112374751-112378011	3.00428e-06	0.530743	0.27	0.068	0.416002	ACSL5	0
chr2-70140819-70143941	0.305793	0.530624	0.384	0.192	1	C2orf42	5938
chr6-30751588-30753114	0.000114521	0.530468	0.292	0.065	1	IER3	7033
chr14-102085052-102088999	0.00555254	0.530449	0.384	0.156	1	HSP90AA1	0
chr19-14784629-14786671	1.62785e-07	0.530275	0.216	0.034	0.0225409	OR7A5	5818
chr3-151168236-151171919	3.85846e-08	0.530197	0.238	0.041	0.00534281	MED12L	0
chr20-53826963-53830833	0.000506608	0.53019	0.238	0.061	1	AC006076.1	25644
chr17-64174564-64175636	1.21112e-14	0.530157	0.222	0.016	1.67704e-09	TEX2	0
chr12-108611872-108614648	0.000198008	0.530145	0.249	0.053	1	SELPLG	7628
chr15-78067433-78070742	1.3061e-08	0.530027	0.27	0.055	0.00180855	TBC1D2B	0
chr10-103849762-103850983	1.23619e-08	0.529927	0.216	0.024	0.00171175	SH3PXD2A	0
chr3-160754209-160757541	0.00523603	0.529882	0.357	0.138	1	PPM1L	0
chr12-57085176-57091149	0.911823	0.52988	0.411	0.209	1	NAB2	0
chr2-161077025-161078666	1.81292e-07	0.529726	0.297	0.067	0.0251035	TANK	58241
chr17-4966114-4970212	0.164469	0.529699	0.427	0.203	1	SPAG7	0
chr16-10832024-10834087	2.04741e-11	0.529649	0.227	0.023	2.83505e-06	TVP23A	13229
chr2-26001674-26003651	3.88474e-09	0.529649	0.216	0.024	0.00053792	KIF3C	18924
chr18-77061401-77063744	6.59768e-08	0.529649	0.265	0.057	0.00913581	MBP	0
chr1-236154984-236157388	3.74097e-07	0.529303	0.243	0.06	0.0518012	GPR137B	0
chr11-117094672-117099492	0.120409	0.529097	0.357	0.152	1	SIK3	0
chr19-44684731-44686353	2.76238e-15	0.529094	0.249	0.023	3.82507e-10	CEACAM19	371
chr15-91852462-91858356	0.00212107	0.529065	0.346	0.118	1	SLCO3A1	0
chr1-221735862-221744121	0.623972	0.528722	0.449	0.252	1	DUSP10	0
chr13-28716386-28719752	0.00179794	0.528692	0.308	0.106	1	SLC46A3	0
chr1-15846791-15850512	0.100377	0.52865	0.341	0.137	1	SPEN	0
chr17-44546728-44548775	3.4046e-13	0.528625	0.216	0.019	4.71435e-08	FZD2	8683
chr2-200861169-200865282	0.00605808	0.528542	0.378	0.147	1	CLK1	0
chr8-38784754-38792257	0.0847874	0.528542	0.341	0.147	1	TACC1	0
chr7-130954206-130962748	0.0308999	0.528368	0.384	0.172	1	RP11-138A9.2	14544
chr12-6197947-6203003	9.12712e-06	0.528242	0.259	0.059	1	CD9	0
chr17-48002354-48004907	1.3437e-10	0.528223	0.2	0.021	1.86062e-05	CDK5RAP3	20579
chr1-54541722-54544606	0.000470864	0.52802	0.292	0.074	1	ACOT11	0
chr15-75638083-75641318	0.0507143	0.528015	0.389	0.15	1	IMP3	0
chr1-10398171-10400968	0.00562069	0.527854	0.33	0.127	1	PGD	0
chr11-70313975-70316240	2.62959e-18	0.527742	0.227	0.015	3.6412e-13	PPFIA1	0
chr21-33975059-33977444	1.73206e-06	0.527566	0.308	0.089	0.239838	AP000569.9	6485
chr22-42930697-42932322	3.46088e-09	0.527357	0.232	0.028	0.000479229	PACSIN2	0
chr6-167092731-167096077	1.47054e-10	0.527344	0.249	0.048	2.03626e-05	RP11-517H2.6	0
chr15-45631005-45632326	5.18631e-06	0.527172	0.227	0.037	0.718149	SQRDL	0
chr14-61523774-61529410	0.276423	0.527146	0.362	0.166	1	RP11-47I22.4	0
chr10-95755339-95759544	0.00023532	0.527018	0.265	0.069	1	ENTPD1	0
chr12-55715459-55718208	0.000531975	0.526978	0.303	0.093	1	BLOC1S1	0
chr1-10964848-10966247	4.63825e-14	0.526827	0.227	0.021	6.42258e-09	C1orf127	0
chr2-218288756-218295726	0.00249596	0.526758	0.357	0.128	1	TMBIM1	0
chr22-20507088-20512761	0.203989	0.52654	0.373	0.155	1	MED15	0
chr3-23748411-23749252	6.89423e-10	0.526497	0.205	0.017	9.54644e-05	UBE2E1	56650
chr9-35728120-35734234	0.845443	0.526454	0.427	0.217	1	CREB3	0
chr6-111113329-111114528	3.11357e-15	0.52633	0.222	0.016	4.31136e-10	SLC16A10	0
chr10-19815374-19818528	8.96374e-05	0.526193	0.227	0.042	1	PLXDC2	0
chr2-12168887-12170497	1.67958e-17	0.526048	0.227	0.015	2.32571e-12	MIR3681HG	0
chr20-48721728-48724314	1.11393e-07	0.525929	0.222	0.036	0.0154246	PREX1	0
chr6-110873284-110877829	0.00750521	0.525897	0.389	0.147	1	AMD1	0
chr1-12615050-12620840	0.111183	0.525721	0.346	0.133	1	DHRS3	0
chr6-14108278-14110491	2.60523e-07	0.525712	0.227	0.038	0.0360746	CD83	6764
chr1-243253151-243256954	0.146566	0.525645	0.4	0.194	1	SDCCAG8	0
chr16-8644184-8646457	3.53624e-09	0.525546	0.205	0.029	0.000489663	METTL22	0
chr10-88270761-88272443	1.61181e-07	0.525448	0.259	0.046	0.0223187	RNLS	1420
chr11-35162125-35164122	2.25557e-14	0.525212	0.227	0.025	3.12329e-09	CD44	0
chr15-90058166-90060161	2.81414e-10	0.525104	0.222	0.026	3.89674e-05	ZNF710	0
chr1-192811514-192813994	1.02645e-15	0.525092	0.227	0.019	1.42133e-10	RGS2	0
chr8-8383609-8387508	4.72484e-05	0.525016	0.281	0.077	1	SGK223	0
chr20-3887940-3893995	0.0410996	0.524929	0.351	0.143	1	PANK2	0
chr14-73751133-73763262	0.714645	0.524895	0.524	0.305	1	ELMSAN1	0
chr17-1736341-1738150	7.01369e-11	0.524702	0.216	0.02	9.71185e-06	WDR81	0
chr4-17576256-17581318	0.324639	0.524667	0.416	0.186	1	LAP3	0
chr20-23147531-23148795	1.251e-07	0.524532	0.249	0.041	0.0173226	RNA5SP478	12061
chr12-53365134-53366767	3.11112e-13	0.52453	0.216	0.019	4.30797e-08	SP1	13408
chr20-38167900-38169758	3.01877e-09	0.52451	0.238	0.032	0.000418009	TGM2	1321
chr17-50864845-50868287	0.126176	0.524069	0.427	0.212	1	TOB1	0
chr14-92655322-92658022	1.7817e-12	0.524037	0.216	0.021	2.46712e-07	RIN3	0
chr6-105991708-105995510	6.34537e-05	0.524033	0.335	0.11	1	ATG5	49912
chr22-31916995-31918803	3.17709e-12	0.523759	0.216	0.021	4.39932e-07	DEPDC5	9960
chr4-121687689-121692808	0.0135476	0.523643	0.265	0.082	1	ANXA5	0
chr5-132257205-132261386	0.00012673	0.523638	0.286	0.068	1	PDLIM4	0
chr19-3365303-3370506	0.000798923	0.523633	0.243	0.057	1	NFIC	0
chr10-11719545-11720826	5.5415e-15	0.523438	0.2	0.013	7.67331e-10	ECHDC3	21539
chr12-54411152-54414165	0.00151321	0.523407	0.297	0.096	1	ITGA5	0
chr20-58690865-58693822	1.27324e-06	0.523373	0.249	0.057	0.176306	STX16-NPEPL1	0
chr4-73704233-73706110	1.18414e-06	0.523192	0.232	0.042	0.163968	AC112518.3	4191
chr22-37241260-37245415	0.000828724	0.523153	0.335	0.128	1	RAC2	0
chr4-98927392-98930888	0.445238	0.522948	0.389	0.191	1	EIF4E	0
chr7-123746193-123749977	0.0211162	0.522882	0.265	0.091	1	WASL	0
chr3-10173267-10174560	1.13428e-08	0.522775	0.243	0.033	0.00157064	IRAK2	0
chr16-30921481-30925475	0.484916	0.522688	0.47	0.253	1	FBXL19	0
chr12-124667902-124669716	2.14814e-17	0.522587	0.216	0.014	2.97453e-12	NCOR2	100312
chr15-51750792-51753267	2.24052e-08	0.522504	0.232	0.036	0.00310244	LYSMD2	0
chr1-30779484-30780987	2.79431e-15	0.522186	0.227	0.022	3.86927e-10	LAPTM5	21663
chr3-196078945-196082903	8.436e-06	0.522093	0.341	0.107	1	TFRC	0
chr2-9989750-9992379	1.4446e-07	0.521907	0.2	0.021	0.0200034	GRHL1	0
chr7-2018653-2020565	1.04381e-06	0.521585	0.238	0.04	0.144536	MAD1L1	0
chr15-74780111-74786097	0.000443494	0.521559	0.324	0.1	1	CSK	0
chr9-89814306-89816681	2.32451e-10	0.521521	0.238	0.028	3.21875e-05	RP5-1050E16.2	0
chr19-45454288-45456837	0.00437435	0.521425	0.254	0.083	1	ERCC1	0
chr7-44044057-44047165	0.00405096	0.521402	0.303	0.1	1	DBNL	0
chr19-53865180-53871935	0.0946784	0.521223	0.384	0.168	1	MYADM	0
chr6-4774734-4778577	0.182956	0.521133	0.346	0.124	1	CDYL	0
chr7-191219-194993	0.0486188	0.520936	0.254	0.08	1	FAM20C	0
chr8-101203393-101207859	0.0156749	0.52081	0.422	0.177	1	ZNF706	0
chr15-39472436-39473479	3.72411e-16	0.520699	0.222	0.012	5.15677e-11	RP11-624L4.2	0
chr9-89439985-89441976	3.79123e-11	0.520697	0.227	0.024	5.24972e-06	SEMA4D	0
chr3-46088967-46090759	1.06964e-06	0.520691	0.259	0.056	0.148114	XCR1	61224
chr5-78529300-78531045	5.54776e-08	0.520427	0.243	0.044	0.00768198	LHFPL2	0
chr13-32314430-32316842	0.00887709	0.520372	0.314	0.116	1	BRCA2	0
chr9-99818646-99825899	0.800565	0.520197	0.541	0.335	1	NR4A3	0
chr15-101264018-101265573	6.65469e-20	0.520131	0.222	0.012	9.21474e-15	VIMP	5243
chr8-133237182-133246422	0.000379173	0.520023	0.27	0.073	1	NDRG1	0
chr6-15066418-15067544	3.17017e-11	0.51996	0.222	0.026	4.38974e-06	RP11-146I2.1	0
chr1-233112654-233115364	1.11565e-05	0.519861	0.292	0.082	1	PCNX2	0
chr9-94654054-94655127	5.13699e-17	0.519855	0.238	0.017	7.11319e-12	FBP1	13804
chr10-103240236-103242436	3.00229e-07	0.519816	0.265	0.05	0.0415728	RPEL1	3450
chr17-8220580-8224196	0.0155123	0.519684	0.378	0.161	1	LINC00324	0
chr19-47323283-47324883	1.70179e-18	0.519654	0.211	0.01	2.35647e-13	C5AR1	1216
chr11-102345747-102348533	0.0228319	0.519565	0.362	0.139	1	BIRC2	0
chr3-53748628-53750704	2.35686e-17	0.519485	0.238	0.02	3.26355e-12	CACNA1D	0
chr9-296781-298118	3.09279e-12	0.519321	0.238	0.028	4.28258e-07	DOCK8	0
chr17-78331857-78332738	3.11253e-15	0.519279	0.211	0.012	4.30993e-10	AC061992.2	0
chr11-66067996-66072632	0.0175394	0.519261	0.308	0.106	1	SF3B2	0
chr2-241314161-241318363	0.0583421	0.519115	0.378	0.158	1	SEPT2	0
chr3-172151857-172154178	1.79992e-07	0.519028	0.254	0.051	0.0249235	FNDC3B	0
chr20-37349546-37351529	1.1681e-12	0.519013	0.211	0.019	1.61747e-07	SRC	0
chr17-39151450-39155278	0.00219046	0.51901	0.314	0.1	1	PLXDC1	0
chr8-23074091-23076008	0.000284058	0.518946	0.243	0.052	1	TNFRSF10B	4911
chr1-115828082-115830273	9.03614e-11	0.518894	0.238	0.036	1.25123e-05	NHLH2	6103
chr7-106344271-106347980	0.00886944	0.518893	0.286	0.105	1	NAMPT	57944
chr17-68237143-68239382	2.26612e-07	0.518784	0.27	0.057	0.0313789	AMZ2	8191
chr2-8542582-8546008	0.00148207	0.51876	0.351	0.134	1	AC011747.3	0
chr4-156970306-156972994	4.29972e-08	0.518746	0.259	0.047	0.00595382	PDGFC	0
chr12-94643450-94645153	1.91659e-08	0.518727	0.238	0.042	0.0026539	TMCC3	0
chr15-33149873-33151538	7.44266e-16	0.518645	0.232	0.02	1.03059e-10	FMN1	0
chr5-148790207-148793373	7.8338e-05	0.518644	0.259	0.064	1	ADRB2	31871
chr10-31697137-31698604	5.22672e-14	0.518624	0.216	0.015	7.23744e-09	RP11-472N13.3	0
chr11-65476337-65479914	0.0487881	0.518551	0.303	0.101	1	CMB9-22P13.2	7326
chr6-44237053-44239462	0.00362832	0.518513	0.319	0.096	1	SLC29A1	2901
chr19-1130404-1134625	0.000496204	0.518465	0.324	0.12	1	SBNO2	0
chr10-93514657-93516349	2.58808e-16	0.51823	0.211	0.011	3.58371e-11	CEP55	0
chr22-30195377-30197534	0.00136896	0.518221	0.303	0.101	1	HORMAD2	18301
chr2-127525291-127528687	0.0173866	0.518121	0.314	0.133	1	IWS1	0
chr16-88633320-88640892	0.0148473	0.518101	0.297	0.107	1	IL17C	0
chr15-81311343-81314130	6.70423e-06	0.518057	0.232	0.05	0.928335	STARD5	0
chr10-3873436-3877917	0.000118724	0.517981	0.281	0.082	1	RP11-464C19.2	38707
chr15-40050465-40056384	4.72641e-05	0.517978	0.265	0.051	1	SRP14-AS1	0
chr6-163404734-163406771	2.51214e-10	0.517948	0.243	0.03	3.47856e-05	CAHM	6293
chr14-68575782-68578566	1.5777e-08	0.517785	0.243	0.032	0.00218464	RAD51B	0
chr5-60520482-60522938	2.27922e-16	0.517776	0.205	0.014	3.15603e-11	PART1	0
chr17-42309652-42314466	1.07911e-05	0.517608	0.232	0.047	1	STAT5A	0
chr9-131743097-131745465	9.8086e-11	0.517479	0.216	0.028	1.3582e-05	RAPGEF1	3022
chr9-133124513-133132373	0.0042694	0.517388	0.319	0.118	1	RALGDS	0
chr21-35044722-35052001	0.0649314	0.517284	0.454	0.203	1	RUNX1	0
chr19-16118161-16120442	5.16657e-08	0.517232	0.238	0.042	0.00715414	RAB8A	0
chr5-177493909-177498584	0.403134	0.51714	0.362	0.159	1	PDLIM7	0
chr22-29152181-29153365	5.84117e-14	0.51713	0.222	0.018	8.08827e-09	KREMEN1	0
chr13-113606405-113608261	6.3996e-13	0.51713	0.222	0.016	8.86153e-08	TFDP1	0
chr8-80346814-80350209	0.000133788	0.517069	0.281	0.083	1	RP11-941H19.3	6973
chr12-124773666-124776061	6.57994e-05	0.517038	0.265	0.068	1	SCARB1	794
chr22-20494395-20497060	0.0218121	0.516962	0.276	0.105	1	KLHL22	0
chr5-142011724-142016991	0.00476818	0.516764	0.335	0.117	1	GNPDA1	0
chr15-45444963-45446231	4.56518e-05	0.516706	0.249	0.056	1	C15orf48	0
chr2-231181606-231182578	4.25631e-14	0.516567	0.216	0.018	5.89371e-09	PSMD1	8778
chr10-13881609-13882772	3.12822e-11	0.516567	0.211	0.018	4.33164e-06	FRMD4A	0
chr16-71894006-71896453	0.0107639	0.516488	0.357	0.141	1	IST1	0
chr1-19483165-19487050	0.00350237	0.51646	0.297	0.111	1	CAPZB	0
chr12-89160435-89163564	9.48122e-05	0.516195	0.303	0.085	1	RP11-13A1.3	0
chr11-73287757-73289921	7.21264e-06	0.51607	0.259	0.053	0.998735	P2RY6	0
chr19-14116856-14119313	0.0262486	0.516069	0.351	0.133	1	PRKACA	0
chr3-52237274-52241310	0.00185212	0.515969	0.378	0.133	1	TWF2	0
chr10-71371548-71373471	5.54195e-18	0.515954	0.216	0.012	7.67394e-13	SLC29A3	8162
chr5-108726435-108731102	0.089119	0.515883	0.27	0.089	1	LINC01023	0
chr7-6025952-6027461	1.0429e-08	0.515855	0.232	0.041	0.00144411	EIF2AK1	0
chr1-236140456-236145178	0.000158876	0.515732	0.319	0.102	1	GPR137B	0
chr20-62952225-62955038	3.63636e-07	0.51571	0.227	0.043	0.0503527	SLC17A9	0
chr1-8211242-8212598	4.72093e-12	0.515627	0.222	0.027	6.53708e-07	RP11-431K24.3	0
chr1-39540364-39541815	4.90521e-16	0.515517	0.232	0.016	6.79224e-11	BMP8A	14428
chr8-38935485-38939670	0.0556611	0.515489	0.368	0.169	1	PLEKHA2	0
chr20-1375539-1378576	4.84369e-10	0.515479	0.249	0.03	6.70705e-05	FKBP1A	0
chr10-62069389-62070635	1.83278e-19	0.515461	0.222	0.011	2.53785e-14	ARID5B	0
chr12-57764452-57767693	0.000182888	0.515461	0.259	0.064	1	CYP27B1	0
chr19-2081520-2085909	2.50816e-06	0.515281	0.286	0.084	0.347304	MOB3A	0
chr7-6382160-6388444	0.213853	0.515263	0.297	0.121	1	RAC1	0
chr17-8915335-8916853	2.17199e-09	0.515191	0.227	0.037	0.000300755	PIK3R5	0
chr16-73068385-73069441	4.16878e-12	0.51488	0.2	0.017	5.77251e-07	RP11-346C20.3	6068
chr16-57339405-57342339	1.72201e-06	0.51472	0.227	0.036	0.238447	CCL22	16432
chr6-152112242-152113546	4.33415e-21	0.514679	0.2	0.009	6.00149e-16	ESR1	0
chr20-62623047-62625517	0.0082214	0.514665	0.292	0.09	1	SLCO4A1	16927
chr3-126959914-126962644	0.0043263	0.514625	0.222	0.065	1	CHCHD6	0
chr3-129233349-129234123	1.66014e-17	0.514533	0.216	0.012	2.2988e-12	COPG1	15482
chr11-76443518-76446345	0.104257	0.514497	0.362	0.159	1	EMSY	0
chr10-45352783-45354683	6.77663e-22	0.51432	0.232	0.011	9.3836e-17	ALOX5	19492
chr5-150065193-150066404	6.82433e-19	0.514249	0.216	0.013	9.44965e-14	CSF1R	0
chr1-27624550-27626809	1.37116e-08	0.514246	0.222	0.034	0.00189865	FGR	0
chr1-160710508-160713450	2.18596e-07	0.514243	0.249	0.052	0.030269	CD48	0
chr15-82044195-82048070	0.0531785	0.514122	0.351	0.132	1	MEX3B	0
chr9-128096844-128100404	0.000605477	0.513999	0.33	0.102	1	SLC25A25	0
chr11-117973295-117975155	1.91977e-16	0.513899	0.238	0.022	2.65831e-11	IL10RA	11192
chr5-74684695-74687385	0.00047126	0.513801	0.265	0.074	1	HEXB	0
chr11-78337105-78339051	3.0585e-17	0.513751	0.2	0.011	4.2351e-12	GAB2	0
chr11-78424131-78425802	4.60366e-10	0.513553	0.211	0.022	6.37468e-05	RP11-452H21.4	0
chr17-68377903-68379136	7.20783e-14	0.513544	0.222	0.016	9.98068e-09	ARSG	0
chr5-95820840-95825113	0.00159458	0.513539	0.33	0.11	1	RHOBTB3	0
chr9-127915244-127919965	0.0357981	0.513507	0.351	0.135	1	ST6GALNAC4	0
chr19-13147175-13148527	1.25856e-15	0.513466	0.211	0.012	1.74273e-10	STX10	0
chr2-42809479-42811886	0.0185688	0.513337	0.335	0.133	1	HAAO	16885
chr19-55321502-55323731	1.22335e-12	0.513262	0.2	0.017	1.69397e-07	TMEM150B	0
chr6-43769032-43775347	0.121786	0.5132	0.357	0.147	1	VEGFA	0
chr20-50308128-50309864	2.74486e-07	0.513077	0.292	0.058	0.0380081	LINC01270	0
chr1-168509130-168511082	1.79348e-11	0.513015	0.222	0.03	2.48343e-06	RP5-968D22.3	13444
chr6-134372820-134375654	1.78267e-08	0.513015	0.238	0.031	0.00246846	RP11-557H15.3	52585
chr12-121450348-121452985	4.19523e-07	0.513001	0.259	0.053	0.0580914	KDM2B	0
chr11-73622900-73624919	2.16027e-15	0.51283	0.216	0.014	2.99133e-10	PLEKHB1	21258
chr14-21263354-21270540	0.751076	0.512824	0.465	0.246	1	HNRNPC	0
chr8-37896648-37900997	0.000822447	0.512809	0.324	0.099	1	RAB11FIP1	0
chr10-23375390-23376864	6.992e-14	0.512634	0.211	0.017	9.68182e-09	C10orf67	30544
chr2-237725585-237727813	4.15543e-14	0.512354	0.227	0.02	5.75402e-09	LRRFIP1	0
chr21-32726617-32729064	0.0114694	0.51225	0.341	0.113	1	SYNJ1	0
chr5-14593319-14596555	4.26983e-09	0.512249	0.249	0.044	0.000591244	FAM105A	0
chr1-156745915-156752597	0.603272	0.512213	0.411	0.219	1	HDGF	0
chr1-17614322-17615616	7.49182e-19	0.51217	0.205	0.008	1.03739e-13	ARHGEF10L	0
chr6-143510727-143512151	5.48927e-10	0.51213	0.259	0.049	7.60099e-05	FUCA2	0
chr8-38379583-38387477	0.846683	0.512097	0.557	0.298	1	WHSC1L1	0
chr2-47056543-47058811	3.97501e-15	0.512073	0.216	0.018	5.5042e-10	C2orf61	0
chr14-60980461-60982595	4.97776e-05	0.51207	0.297	0.083	1	TRMT5	0
chr10-43403082-43411961	0.342872	0.512042	0.405	0.206	1	HNRNPF	0
chr7-74655117-74661526	0.284879	0.511905	0.362	0.173	1	GTF2I	0
chr11-74685498-74688013	1.72086e-13	0.511732	0.222	0.021	2.38288e-08	CHRDL2	8415
chr17-75782773-75786723	0.0318239	0.511708	0.389	0.154	1	UNK	0
chr12-1604996-1606686	0.00412354	0.511704	0.243	0.07	1	WNT5B	0
chr9-128190760-128193593	0.0195679	0.511607	0.265	0.091	1	CIZ1	0
chr2-112690600-112693514	0.00862028	0.511366	0.303	0.114	1	SLC20A1	26772
chr17-40340816-40346186	0.00428057	0.511106	0.292	0.094	1	RARA	0
chr17-64973887-64976577	0.0555092	0.511079	0.389	0.176	1	RP11-583F2.7	19709
chr17-1227900-1230543	2.42112e-10	0.511044	0.243	0.032	3.35252e-05	ABR	0
chr5-50873838-50875256	8.97887e-16	0.511011	0.227	0.016	1.2433e-10	RP11-317O24.1	13817
chr5-35850916-35854845	0.000418404	0.510882	0.281	0.078	1	IL7R	0
chr10-69053857-69058497	2.61143e-05	0.510856	0.227	0.054	1	KIF1BP	10312
chr1-184824423-184826411	7.70838e-13	0.510787	0.2	0.016	1.06738e-07	FAM129A	0
chr2-205706592-205707834	5.20364e-10	0.510771	0.254	0.033	7.20548e-05	NRP2	0
chr20-50346258-50349791	5.64423e-10	0.510554	0.216	0.032	7.81556e-05	LINC01271	24915
chr7-5554452-5559549	0.598548	0.510506	0.384	0.161	1	ACTB	0
chr1-53891708-53893519	2.35707e-14	0.510505	0.216	0.015	3.26383e-09	DIO1	0
chr6-108596945-108598941	9.70071e-10	0.510446	0.2	0.026	0.000134326	FOXO3	0
chr11-48031583-48032552	3.00382e-17	0.510392	0.232	0.019	4.15939e-12	PTPRJ	0
chr7-91263198-91266096	0.00864979	0.510383	0.297	0.102	1	FZD1	0
chrX-12970510-12976586	0.00101395	0.510336	0.297	0.105	1	TMSB4X	0
chr16-1609943-1615262	0.637965	0.510253	0.357	0.176	1	CRAMP1	0
chr2-202374827-202378348	0.0165007	0.510193	0.303	0.103	1	BMPR2	0
chr1-37482804-37488151	0.00118273	0.510137	0.254	0.08	1	ZC3H12A	0
chr18-74478858-74481338	9.00766e-16	0.510052	0.205	0.013	1.24729e-10	CNDP2	14477
chr19-1167992-1174598	0.000538212	0.51004	0.27	0.084	1	SBNO2	0
chr22-42993602-42995727	1.48847e-10	0.510002	0.227	0.023	2.06108e-05	PACSIN2	0
chr19-58181867-58184186	0.0448937	0.509962	0.292	0.108	1	ZNF274	0
chr15-75449666-75456690	0.0147618	0.509623	0.6	0.428	1	SIN3A	0
chr1-24189568-24192870	1.83037e-05	0.50952	0.276	0.068	1	IFNLR1	1608
chr7-77412832-77416996	3.97093e-05	0.50952	0.281	0.065	1	GSAP	0
chr9-214103-216776	3.7012e-06	0.509492	0.232	0.05	0.512505	DOCK8	0
chr10-6050427-6055106	0.000583898	0.50942	0.351	0.122	1	IL2RA	0
chr20-50107101-50113871	0.326529	0.509296	0.33	0.149	1	UBE2V1	0
chr5-68433557-68436015	0.00423965	0.5092	0.292	0.103	1	CTC-537E7.3	0
chr9-137031787-137035804	2.71009e-05	0.509144	0.276	0.078	1	RP11-229P13.27	0
chr17-80258166-80266370	0.0418881	0.509109	0.438	0.178	1	RNF213	0
chr9-33813588-33819486	0.235515	0.509104	0.389	0.196	1	UBE2R2	0
chr11-47979357-47984069	1.26848e-05	0.509058	0.249	0.064	1	PTPRJ	0
chr7-135150253-135152088	3.37552e-12	0.508992	0.222	0.02	4.67408e-07	TMEM140	0
chr21-33215279-33216900	5.20412e-08	0.50899	0.232	0.039	0.00720614	IFNAR2	13000
chr6-157018974-157022790	0.15786	0.508941	0.314	0.132	1	ARID1B	0
chr15-45586327-45589626	0.0134217	0.508899	0.319	0.117	1	BLOC1S6	0
chr11-86066300-86070265	0.109859	0.508865	0.378	0.171	1	PICALM	0
chr2-28406196-28411176	0.0166408	0.508802	0.351	0.144	1	FOSL2	0
chr5-74637852-74643729	0.158187	0.508797	0.297	0.126	1	ENC1	0
chr21-34835333-34836968	1.23722e-11	0.508763	0.2	0.018	1.71318e-06	RUNX1	0
chr3-127588277-127592495	0.645747	0.508752	0.33	0.17	1	TPRA1	0
chr12-49824796-49829377	0.0599872	0.508692	0.335	0.123	1	NCKAP5L	0
chr16-53098416-53100700	0.035151	0.508668	0.297	0.115	1	CHD9	0
chr3-122232955-122234284	1.69401e-09	0.508335	0.2	0.022	0.000234569	CASR	0
chr11-72793131-72795330	0.000341366	0.508062	0.303	0.096	1	STARD10	0
chr17-81046916-81052263	0.0011994	0.508031	0.297	0.074	1	BAIAP2	0
chr12-111428024-111432916	9.79727e-07	0.507912	0.249	0.05	0.135663	SH2B3	0
chr18-23584041-23587673	0.358917	0.507743	0.308	0.134	1	NPC1	0
chr6-159061939-159064841	6.33359e-06	0.507738	0.254	0.065	0.877012	RP1-111C20.3	0
chr2-191017944-191023753	0.0251144	0.507706	0.341	0.136	1	STAT1	0
chr5-179791708-179797478	0.00461525	0.507659	0.281	0.088	1	LTC4S	0
chr15-92902613-92908654	0.0827663	0.507555	0.416	0.213	1	CHD2	0
chr19-1901071-1902363	4.54544e-17	0.50745	0.205	0.015	6.29408e-12	SCAMP4	2850
chr14-65205332-65208993	5.01144e-06	0.507385	0.222	0.049	0.693934	CTD-2509G16.2	3899
chr17-36543862-36546732	0.0908172	0.507244	0.362	0.155	1	GGNBP2	0
chr10-31581828-31583498	6.42329e-18	0.507213	0.211	0.013	8.89433e-13	RP11-472N13.2	21101
chr18-55321133-55322933	1.45006e-06	0.507206	0.238	0.047	0.20079	TCF4	0
chr12-75478090-75483862	0.00038359	0.507205	0.314	0.12	1	GLIPR1	0
chr7-28509091-28510356	1.58327e-16	0.507168	0.232	0.015	2.19235e-11	CREB5	0
chr21-33300780-33302862	3.69641e-09	0.507151	0.243	0.039	0.000511842	IL10RB	0
chr2-101622610-101623944	3.22548e-14	0.507079	0.216	0.018	4.46632e-09	MAP4K4	72905
chr9-72362024-72366453	0.258469	0.506951	0.405	0.196	1	ZFAND5	0
chr7-66739428-66743080	0.185859	0.5069	0.33	0.145	1	RABGEF1	0
chr5-170307382-170309073	5.25092e-09	0.506862	0.222	0.026	0.000727096	CTB-114C7.4	0
chr16-31354211-31355539	9.1112e-11	0.506423	0.243	0.034	1.26163e-05	ITGAX	0
chr17-2122527-2124340	3.77248e-13	0.506393	0.232	0.023	5.22375e-08	SMG6	0
chr15-59312139-59314445	2.45123e-08	0.506382	0.216	0.037	0.00339422	MYO1E	0
chr21-31342253-31345460	0.00229611	0.506324	0.238	0.063	1	TIAM1	0
chr1-205284177-205288874	0.068742	0.506246	0.335	0.133	1	TMCC2	10833
chr1-46613058-46617686	0.00439891	0.50582	0.281	0.097	1	MOB3C	0
chr2-144606631-144608338	9.41191e-14	0.505796	0.205	0.014	1.30327e-08	LINC01412	27196
chr4-153654921-153656992	2.73091e-10	0.505359	0.2	0.021	3.78149e-05	KIAA0922	18209
chr18-47929631-47933059	0.151501	0.505299	0.351	0.169	1	SMAD2	0
chr21-44845411-44847184	0.00014138	0.505193	0.222	0.042	1	PTTG1IP	2400
chr2-28750152-28754602	0.474717	0.505007	0.297	0.14	1	PPP1CB	0
chrX-1504166-1505609	1.20956e-12	0.504909	0.2	0.016	1.67488e-07	P2RY8	0
chr1-36299710-36301033	0.00226314	0.504908	0.259	0.07	1	THRAP3	0
chr11-110797270-110799210	3.43041e-15	0.504837	0.216	0.019	4.75008e-10	ARHGAP20	84080
chr20-38143130-38145674	0.0122667	0.504806	0.292	0.086	1	TGM2	0
chr19-3450719-3451905	1.83696e-12	0.50473	0.216	0.025	2.54363e-07	NFIC	0
chr2-174662421-174664785	3.56895e-11	0.504592	0.2	0.017	4.94192e-06	WIPF1	0
chr8-73877125-73880710	0.180207	0.504509	0.346	0.141	1	UBE2W	0
chr19-10862814-10865028	1.56615e-06	0.504392	0.227	0.043	0.216864	C19orf38	0
chr3-50241315-50243899	4.41438e-06	0.504392	0.232	0.044	0.611259	GNAI2	0
chr16-50695290-50700545	0.735699	0.504389	0.378	0.183	1	NOD2	0
chr5-160164976-160166549	1.74388e-09	0.504352	0.222	0.03	0.000241476	FABP6	20817
chr2-38146269-38147496	2.62485e-08	0.504352	0.222	0.031	0.00363463	AC009229.6	7322
chr12-609675-611230	5.86666e-06	0.504286	0.216	0.036	0.812357	NINJ2	0
chr20-40682123-40685762	5.43647e-09	0.504253	0.232	0.036	0.000752789	MAFB	85
chr18-79624519-79626421	1.48555e-14	0.50421	0.243	0.023	2.05704e-09	RP11-567M16.2	12215
chr10-102501219-102505371	0.587062	0.504119	0.432	0.223	1	ACTR1A	0
chr22-30272891-30274613	4.11367e-16	0.504097	0.2	0.014	5.6962e-11	OSM	6050
chr17-78664714-78667048	1.2506e-09	0.504078	0.222	0.032	0.000173171	CYTH1	6999
chr6-36627359-36629712	2.33821e-06	0.50403	0.227	0.048	0.323771	SRSF3	21758
chr12-113358005-113360550	0.00131101	0.503972	0.27	0.081	1	PLBD2	0
chr22-38753652-38757456	0.0410735	0.503893	0.286	0.112	1	SUN2	0
chr1-150186022-150187732	1.92181e-11	0.503805	0.238	0.031	2.66113e-06	PLEKHO1	21301
chr17-17834393-17838774	8.6104e-05	0.503773	0.286	0.09	1	SREBF1	0
chr12-52050020-52061611	0.457647	0.503574	0.4	0.204	1	NR4A1	0
chr3-45592452-45597925	0.0310131	0.503505	0.314	0.123	1	LIMD1	0
chr11-102546000-102547571	2.12198e-13	0.503468	0.205	0.018	2.93831e-08	MMP7	15246
chr9-70418004-70422858	0.866435	0.50341	0.459	0.239	1	KLF9	3379
chr20-33810700-33813399	0.175618	0.503337	0.341	0.147	1	CHMP4B	0
chr9-113187644-113188727	1.25449e-08	0.503287	0.222	0.03	0.00173709	FKBP15	0
chr19-18659166-18661696	3.08265e-14	0.503248	0.2	0.015	4.26855e-09	KLHL26	0
chr11-11841082-11843981	0.00370072	0.503084	0.281	0.104	1	USP47	0
chr6-12008023-12014479	0.408662	0.503046	0.476	0.242	1	HIVEP1	0
chr6-46733266-46735910	9.35839e-10	0.503041	0.232	0.027	0.000129586	PLA2G7	0
chr5-91311145-91315025	0.0206768	0.503014	0.319	0.138	1	RP11-213H15.4	0
chr18-5542611-5544362	2.21317e-14	0.502995	0.2	0.013	3.06457e-09	EPB41L3	0
chr22-35379978-35381867	1.21553e-09	0.502955	0.227	0.033	0.000168314	HMOX1	0
chr19-45038528-45041254	0.000202707	0.502757	0.27	0.079	1	CLASRP	0
chr22-37050309-37052417	9.70185e-09	0.502682	0.276	0.05	0.00134342	KCTD17	0
chr6-37047655-37052639	0.00304375	0.502636	0.341	0.116	1	FGD2	18584
chr5-177415943-177416826	2.79447e-16	0.502482	0.205	0.009	3.8695e-11	GRK6	0
chr19-43673732-43676141	5.14813e-05	0.502453	0.265	0.065	1	PLAUR	3184
chr6-32587608-32590411	3.11351e-08	0.502394	0.249	0.052	0.00431128	HLA-DRB1	0
chr1-159848514-159850789	1.09324e-06	0.502332	0.211	0.036	0.151381	C1orf204	0
chr1-15831782-15837897	0.275773	0.502328	0.47	0.226	1	SPEN	9966
chr11-692621-698679	0.411578	0.502291	0.405	0.204	1	TMEM80	0
chr17-64441989-64443489	5.29161e-12	0.50224	0.216	0.025	7.32729e-07	MILR1	5547
chr11-72221309-72226120	0.0301285	0.502233	0.324	0.13	1	FOLR2	0
chr19-50328086-50331378	0.000591222	0.502228	0.292	0.094	1	KCNC3	0
chr9-126859947-126862883	2.83131e-07	0.502221	0.265	0.062	0.0392052	ZBTB34	0
chr19-46824157-46826144	2.23908e-09	0.502137	0.238	0.033	0.000310046	AP2S1	11991
chr16-67528100-67532130	2.55665e-06	0.502059	0.259	0.055	0.35402	FAM65A	0
chr17-7571932-7575702	0.0331805	0.502045	0.395	0.177	1	SENP3-EIF4A1	0
chr22-42612794-42616547	0.23651	0.502045	0.378	0.176	1	POLDIP3	0
chr12-124591807-124593311	1.33601e-10	0.502014	0.227	0.022	1.84997e-05	NCOR2	24217
chr6-144284075-144287585	0.000456322	0.501944	0.303	0.083	1	UTRN	0
chr5-172361284-172363137	2.05284e-05	0.50194	0.227	0.046	1	SH3PXD2B	0
chr14-76767753-76769397	4.10533e-10	0.501653	0.265	0.046	5.68465e-05	VASH1	0
chr3-50333939-50341980	0.339972	0.501644	0.384	0.191	1	RASSF1	0
chr1-153773050-153776605	0.00057978	0.501472	0.281	0.083	1	SLC27A3	0
chr11-72812646-72816155	0.339384	0.50136	0.395	0.184	1	ATG16L2	0
chr6-6806658-6807336	1.31158e-17	0.501316	0.205	0.012	1.81614e-12	RP3-470L22.1	47366
chr17-35241486-35245758	0.694267	0.501222	0.341	0.179	1	SLFN5	0
chr10-79001016-79001963	3.93271e-18	0.501031	0.205	0.012	5.44563e-13	RP11-481G8.2	0
chr20-19934610-19938090	0.00240331	0.500998	0.281	0.081	1	RIN2	0
chr1-33459528-33461730	1.44968e-09	0.500922	0.2	0.02	0.000200737	ZSCAN20	10914
chr6-37168719-37174632	0.634516	0.500907	0.432	0.22	1	PIM1	0
chr1-112955107-112958697	0.0605387	0.50087	0.351	0.134	1	SLC16A1	0
chr9-73219504-73220842	0.000391118	0.500861	0.216	0.049	1	ANXA1	49110
chr2-69913755-69916336	0.603041	0.50077	0.405	0.2	1	MXD1	0
chr1-184386238-184389872	0.03609	0.500722	0.297	0.104	1	C1orf21	0
chr15-74430498-74435116	0.0105288	0.500575	0.238	0.075	1	SEMA7A	0
chr2-27889689-27892156	0.0257004	0.500307	0.319	0.121	1	RBKS	0
chr14-50037808-50041088	0.83015	0.500217	0.416	0.215	1	LINC01588	0
chr6-15612490-15613397	5.3506e-16	0.500178	0.205	0.011	7.40898e-11	DTNBP1	0
chr1-32990905-32994060	0.00577048	0.500092	0.292	0.1	1	AK2	13879
chr16-2486704-2488641	4.74318e-07	0.499994	0.227	0.03	0.0656789	TBC1D24	0
chr6-15508297-15509944	2.34048e-14	0.499894	0.211	0.013	3.24086e-09	JARID2	0
chr7-135206815-135209683	4.1486e-18	0.499823	0.227	0.02	5.74456e-13	WDR91	0
chr21-42513227-42515617	1.70889e-05	0.499806	0.232	0.051	1	SLC37A1	0
chr12-24950527-24952618	4.43658e-13	0.499805	0.227	0.022	6.14334e-08	BCAT1	1067
chr19-51784653-51785618	5.73652e-12	0.499771	0.243	0.025	7.94336e-07	FPR1	0
chr17-32141072-32143521	5.93306e-07	0.499757	0.276	0.054	0.0821551	RHOT1	0
chr8-127759296-127761296	1.18477e-09	0.499703	0.222	0.031	0.000164055	MYC	17861
chr6-31399208-31404476	0.324979	0.499666	0.389	0.17	1	MICA	0
chr12-120228084-120233246	0.235078	0.499503	0.314	0.137	1	PXN	0
chr2-177164362-177166891	0.000702709	0.499466	0.227	0.06	1	AC079305.11	0
chr12-113141943-113143323	1.81952e-14	0.499278	0.227	0.019	2.51948e-09	RASAL1	5703
chr9-131597915-131599891	2.6566e-11	0.499278	0.2	0.018	3.6786e-06	RAPGEF1	0
chr8-55878683-55882836	0.00357551	0.499266	0.276	0.081	1	LYN	0
chr6-106083698-106089153	0.00964086	0.499147	0.276	0.096	1	PRDM1	0
chr8-141126944-141132350	0.698253	0.499071	0.422	0.217	1	DENND3	0
chr2-234307930-234309829	1.70135e-11	0.499043	0.254	0.047	2.35586e-06	RP11-309M7.1	83415
chr3-119310062-119312104	8.69898e-11	0.498983	0.205	0.019	1.20455e-05	ARHGAP31	0
chr13-49995264-49998498	0.0252447	0.498812	0.314	0.112	1	TRIM13	0
chr4-40553963-40555541	3.82098e-17	0.498757	0.2	0.013	5.29091e-12	RBM47	0
chr10-69464293-69465907	7.73495e-18	0.498716	0.227	0.017	1.07106e-12	TSPAN15	0
chr13-99305656-99308498	6.48073e-07	0.498689	0.243	0.057	0.0897387	GPR183	0
chr8-133919175-133920070	2.75217e-08	0.49865	0.216	0.027	0.00381093	RP11-157E21.1	16767
chr22-37636198-37641627	0.00844577	0.498633	0.27	0.1	1	SH3BP1	0
chr16-10870042-10872206	0.000466204	0.498617	0.27	0.069	1	CIITA	0
chr1-160645191-160647732	2.42627e-08	0.498574	0.222	0.038	0.00335965	SLAMF1	0
chr17-42517264-42519300	7.72604e-05	0.498501	0.232	0.047	1	ATP6V0A1	0
chr3-15275051-15276606	6.36693e-15	0.49846	0.205	0.015	8.81629e-10	SH3BP5	0
chr15-68815563-68822522	0.464755	0.498402	0.357	0.17	1	ANP32A	0
chr10-48654437-48657078	1.06431e-05	0.498182	0.243	0.057	1	ARHGAP22	0
chr20-38151518-38153332	5.50043e-07	0.498088	0.211	0.028	0.0761644	TGM2	0
chr10-124721307-124725202	0.000197147	0.49805	0.259	0.078	1	RP11-12J10.3	0
chr12-98438870-98440539	1.9142e-09	0.497833	0.211	0.026	0.000265059	RP11-181C3.1	45004
chr16-28505005-28508542	8.18515e-08	0.497736	0.238	0.043	0.011334	IL27	0
chr10-69460818-69461704	6.93406e-22	0.49765	0.216	0.007	9.60159e-17	TSPAN15	0
chr20-37333257-37334375	2.23776e-14	0.497612	0.2	0.014	3.09863e-09	SRC	10309
chr8-65980831-65982581	1.10663e-13	0.497593	0.211	0.018	1.53235e-08	DNAJC5B	38978
chr4-40204306-40207898	3.66711e-08	0.497477	0.232	0.041	0.00507784	RHOH	0
chr21-45554413-45556496	0.000396901	0.497082	0.254	0.072	1	SLC19A1	10001
chr20-44965919-44971903	0.00397962	0.497063	0.362	0.133	1	STK4	0
chr3-179652092-179654763	0.0136727	0.497062	0.254	0.078	1	USP13	0
chr8-22596803-22601522	0.196219	0.496895	0.314	0.121	1	C8orf58	0
chr12-6532045-6541282	0.771425	0.496853	0.449	0.25	1	GAPDH	0
chr3-172707045-172711815	0.418112	0.496831	0.324	0.137	1	NCEH1	0
chr3-187011940-187013472	1.86099e-19	0.49677	0.222	0.013	2.57691e-14	ST6GAL1	0
chr14-70881788-70883642	1.20312e-13	0.496751	0.227	0.019	1.66596e-08	RP1-292L20.3	23014
chr8-21674497-21675549	2.05346e-13	0.496751	0.227	0.018	2.84343e-08	GFRA2	14853
chr21-14863686-14865059	1.28877e-11	0.496733	0.232	0.023	1.78455e-06	AF127936.7	0
chr3-23202241-23204204	0.000336918	0.496669	0.211	0.044	1	UBE2E2	0
chr2-218322102-218324601	0.00010927	0.496663	0.249	0.043	1	PNKD	0
chr2-55418554-55420779	8.8608e-05	0.496584	0.265	0.072	1	CCDC88A	0
chr1-40338634-40340690	6.0116e-13	0.496461	0.205	0.023	8.32426e-08	SMAP2	4159
chr1-226661418-226665164	0.0233846	0.49639	0.351	0.143	1	ITPKB	0
chr1-26286854-26291032	3.26684e-06	0.496339	0.259	0.067	0.452359	UBXN11	0
chr7-2629682-2634707	0.906688	0.496291	0.351	0.18	1	TTYH3	0
chr8-19387516-19389887	1.36062e-13	0.496199	0.205	0.015	1.88406e-08	SH2D4A	0
chr4-105060460-105062081	1.77298e-10	0.496147	0.243	0.039	2.45505e-05	RP11-556I14.1	0
chr17-73163656-73167453	2.81896e-06	0.496139	0.227	0.041	0.390342	SSTR2	0
chr2-112031529-112034025	1.10927e-06	0.496135	0.243	0.043	0.1536	MERTK	1967
chr5-91379632-91385336	0.356613	0.496105	0.486	0.272	1	ARRDC3	0
chr22-24502594-24504958	1.74394e-08	0.495892	0.216	0.03	0.00241484	UPB1	0
chr12-121796796-121806967	0.518894	0.495801	0.443	0.239	1	SETD1B	0
chr11-610907-617298	0.0295436	0.495764	0.314	0.113	1	PHRF1	0
chr1-36372913-36375226	0.0333291	0.49576	0.314	0.121	1	STK40	0
chr10-58383983-58386215	0.000170032	0.49557	0.249	0.074	1	TFAM	0
chr19-1064654-1069940	1.7123e-06	0.495548	0.324	0.095	0.237103	ABCA7	0
chr10-44958079-44961367	0.0001124	0.495315	0.27	0.086	1	RASSF4	0
chr12-49017782-49020354	0.0234688	0.495299	0.324	0.121	1	PRKAG1	0
chr1-155322159-155326025	0.198409	0.495271	0.422	0.188	1	RUSC1	0
chr5-175554374-175555868	2.56296e-20	0.495069	0.2	0.006	3.54893e-15	SFXN1	24631
chr11-65307419-65309454	7.38141e-07	0.495069	0.2	0.025	0.10221	POLA2	1829
chr14-73885951-73889782	0.0309561	0.495069	0.308	0.122	1	ZNF410	0
chr9-98248043-98257070	0.739731	0.495069	0.422	0.232	1	TBC1D2	0
chr19-44913145-44915649	6.2428e-06	0.494807	0.238	0.054	0.86444	APOC1	0
chr11-117928286-117932709	8.77254e-06	0.494805	0.243	0.049	1	TMPRSS13	0
chr7-151922984-151924044	6.26339e-15	0.494787	0.216	0.016	8.67291e-10	GALNTL5	32334
chr1-22652423-22653788	2.88235e-17	0.494501	0.216	0.011	3.9912e-12	C1QB	0
chr11-33256059-33259265	0.029759	0.494364	0.314	0.108	1	HIPK3	0
chr5-95860777-95863743	7.29722e-05	0.494281	0.238	0.052	1	AC008592.5	0
chr19-10276733-10280856	2.45518e-06	0.494238	0.205	0.025	0.339969	ICAM1	0
chr2-112707290-112708680	5.13668e-18	0.494223	0.227	0.015	7.11277e-13	NT5DC4	12805
chr13-48504496-48508642	0.00431088	0.494087	0.281	0.085	1	RCBTB2	0
chr22-42376051-42377219	9.88196e-19	0.493928	0.205	0.01	1.36835e-13	NFAM1	3190
chr9-91162048-91165398	0.0127354	0.493891	0.308	0.102	1	LINC00484	0
chr3-43768577-43771814	0.000584315	0.493796	0.259	0.068	1	RP4-672N11.1	7146
chr6-13302424-13304135	5.71708e-05	0.493752	0.232	0.046	1	TBC1D7	0
chr8-102787762-102791811	0.0371313	0.493722	0.324	0.128	1	KB-1732A1.1	13705
chr6-108557493-108563089	0.264186	0.493696	0.416	0.204	1	FOXO3	0
chr18-58361895-58363339	4.17171e-13	0.493659	0.205	0.016	5.77656e-08	NEDD4L	0
chr14-75293566-75296695	0.274959	0.493547	0.346	0.153	1	LINC01220	0
chr22-44179991-44183502	1.37094e-05	0.49351	0.249	0.056	1	PARVG	0
chr2-74833179-74836883	0.00232171	0.49343	0.324	0.11	1	HK2	0
chr11-119105995-119108966	0.0026651	0.493361	0.286	0.089	1	C2CD2L	0
chr21-36319479-36323508	0.0648066	0.493359	0.378	0.161	1	MORC3	0
chr5-150762173-150765398	1.25125e-05	0.493179	0.211	0.039	1	DCTN4	3063
chr3-45033883-45036484	2.08704e-09	0.493165	0.211	0.035	0.000288992	CLEC3B	0
chr9-131620795-131623066	2.33155e-09	0.493138	0.216	0.026	0.000322849	RAPGEF1	0
chr5-150409375-150413923	0.264144	0.493119	0.438	0.211	1	CD74	0
chr17-39641719-39643717	5.36827e-18	0.49308	0.205	0.013	7.43344e-13	STARD3	0
chr14-34872354-34875827	0.499843	0.49295	0.314	0.161	1	BAZ1A	0
chr17-78882562-78884862	5.53935e-05	0.492917	0.227	0.039	1	CEP295NL	0
chr9-127561141-127564717	0.00446812	0.492915	0.292	0.097	1	FAM129B	0
chr6-30212048-30214878	0.0131733	0.492876	0.357	0.147	1	TRIM26	0
chr2-112480376-112484236	0.0806494	0.492818	0.319	0.133	1	TTL	0
chr8-96853188-96855126	3.89771e-17	0.492804	0.211	0.015	5.39716e-12	CPQ	0
chr14-100339720-100344018	6.20205e-07	0.492785	0.259	0.066	0.0858798	WARS	0
chr5-56479107-56482827	0.000116185	0.492731	0.243	0.056	1	CTC-236F12.4	0
chr19-50383471-50386532	0.00738647	0.492698	0.314	0.104	1	POLD1	0
chr2-10028895-10030500	4.25072e-11	0.492586	0.238	0.027	5.88597e-06	RP11-254F7.1	6069
chr10-94402089-94404249	0.000316639	0.492444	0.211	0.053	1	TBC1D12	0
chr10-63628454-63631563	0.0232058	0.492302	0.292	0.117	1	REEP3	3330
chr15-58329919-58333516	0.0033904	0.492297	0.249	0.072	1	ALDH1A2	0
chr7-31811527-31812510	1.40859e-17	0.492239	0.211	0.013	1.95048e-12	PDE1C	0
chr15-58146646-58147630	2.91186e-14	0.491956	0.205	0.014	4.03206e-09	ALDH1A2	0
chr17-42673829-42680429	0.0908989	0.491935	0.378	0.172	1	CCR10	0
chr1-149884531-149889313	0.566511	0.491931	0.459	0.263	1	HIST2H2BE	0
chr1-6598588-6604325	0.948734	0.491901	0.438	0.227	1	KLHL21	0
chr16-4623639-4626477	0.00597232	0.49188	0.346	0.124	1	MGRN1	0
chr2-112053804-112057333	0.592186	0.491813	0.395	0.218	1	TMEM87B	0
chr5-109408648-109412167	0.948338	0.49172	0.395	0.204	1	PJA2	0
chr18-3602378-3606630	0.0876955	0.491713	0.319	0.138	1	DLGAP1	0
chr16-50683557-50686123	7.16143e-07	0.491681	0.254	0.056	0.0991643	SNX20	2203
chr3-69081448-69090737	0.995638	0.491432	0.438	0.245	1	ARL6IP5	0
chr12-14554142-14555068	6.54057e-09	0.491418	0.2	0.018	0.000905673	PLBD1	0
chr13-80338625-80343511	0.027903	0.491381	0.324	0.114	1	SPRY2	0
chr11-62838828-62842800	0.6319	0.491366	0.481	0.259	1	WDR74	0
chr12-24946971-24949657	4.29131e-07	0.491331	0.232	0.043	0.0594218	BCAT1	0
chr6-30100462-30103896	0.149793	0.491175	0.319	0.122	1	TRIM31	0
chr19-52048043-52049799	0.00310421	0.49113	0.27	0.083	1	ZNF432	0
chr15-90570675-90571699	4.48485e-14	0.491123	0.205	0.017	6.21018e-09	CRTC3	0
chr22-42855973-42857745	0.00130126	0.491104	0.276	0.081	1	ARFGAP3	0
chr20-46117536-46119790	0.00669132	0.491052	0.276	0.072	1	CD40	0
chr1-150233225-150236791	0.484759	0.491004	0.346	0.184	1	ANP32E	0
chr1-234961725-234963857	4.7756e-05	0.490625	0.227	0.053	1	RP11-443B7.1	0
chr19-5621244-5626022	0.0106614	0.490623	0.303	0.109	1	SAFB	0
chr19-49928303-49930916	0.00298623	0.490568	0.303	0.105	1	ATF5	0
chr19-14004725-14007374	0.544428	0.490561	0.384	0.179	1	RFX1	0
chr1-206889743-206891666	0.00469457	0.490536	0.259	0.072	1	IL24	5776
chr9-129138688-129141913	0.136793	0.490345	0.324	0.133	1	PTPA	0
chr2-68318887-68320665	2.2758e-09	0.490314	0.211	0.021	0.00031513	CNRIP1	0
chr1-235326538-235330659	0.559544	0.490296	0.416	0.22	1	ARID4B	0
chr19-41223128-41227263	0.0077748	0.490236	0.259	0.066	1	AXL	0
chr7-44747634-44751651	0.035452	0.490135	0.368	0.132	1	ZMIZ2	0
chr12-6167070-6169753	0.00163158	0.490033	0.254	0.073	1	RP3-454B23.1	6350
chr13-46551425-46556755	0.0311978	0.490031	0.373	0.143	1	LRCH1	0
chr17-80890981-80893488	0.401901	0.489959	0.362	0.158	1	RPTOR	0
chr18-63235927-63238844	2.5861e-07	0.489889	0.232	0.033	0.0358097	BCL2	0
chr7-23246220-23248599	8.10679e-05	0.489842	0.238	0.055	1	GPNMB	0
chr8-125385709-125387126	2.99892e-11	0.489794	0.205	0.024	4.15261e-06	NSMCE2	18588
chr2-207623845-207627734	0.047572	0.489781	0.351	0.142	1	METTL21A	0
chr12-54382835-54383792	1.58199e-08	0.489675	0.232	0.038	0.00219059	ZNF385A	0
chr5-142816330-142820125	2.70121e-07	0.489675	0.222	0.039	0.0374036	ARHGAP26	0
chr5-36679317-36680492	2.50263e-17	0.489656	0.211	0.012	3.46539e-12	SLC1A3	0
chr15-89836236-89838148	2.21243e-09	0.489617	0.232	0.032	0.000306355	AP3S2	0
chr12-120110401-120112679	3.83306e-12	0.489577	0.205	0.03	5.30763e-07	RAB35	0
chr2-168455201-168457913	1.97394e-05	0.489548	0.27	0.075	1	CERS6	0
chr1-32013026-32016900	0.0564048	0.48938	0.319	0.125	1	KHDRBS1	0
chr2-181891223-181893526	0.000256331	0.489373	0.281	0.082	1	SSFA2	0
chr2-40449937-40452428	1.20067e-06	0.489303	0.2	0.03	0.166257	SLC8A1	0
chr20-1819209-1821312	4.85644e-10	0.489197	0.216	0.021	6.72471e-05	RP5-968J1.1	1602
chr2-217933108-217935680	0.00108379	0.489178	0.216	0.04	1	TNS1	0
chr11-206467-210477	0.0125177	0.489109	0.368	0.156	1	RIC8A	0
chr1-159012304-159016138	0.000331832	0.489047	0.286	0.079	1	IFI16	0
chr18-23528463-23530553	2.28275e-09	0.488985	0.211	0.027	0.000316092	C18orf8	0
chr1-43834128-43835744	1.22819e-12	0.488918	0.205	0.021	1.70067e-07	ST3GAL3	0
chr16-48535154-48538513	0.00215601	0.488905	0.232	0.064	1	N4BP1	212
chr14-35284492-35288153	0.00319687	0.488884	0.254	0.061	1	RP11-561B11.2	0
chr17-7883839-7889977	0.0204238	0.488755	0.351	0.148	1	CHD3	0
[truncated: 3,993 more rows]

## Sheet: Langerhans
	p_val	avg_log2FC	pct.1	pct.2	p_val_adj	gene	distance
chr20-59004265-59009482	6.34064e-56	0.705053	0.327	0.074	8.77988e-51	CTSZ	0
chr10-73905498-73912292	8.24691e-51	0.696167	0.363	0.111	1.14195e-45	PLAU	0
chr19-10415698-10426967	4.7524e-31	0.598946	0.417	0.188	6.58065e-26	PDE4A	0
chr15-85578895-85586663	2.8905e-33	0.589532	0.381	0.144	4.00247e-28	AKAP13	0
chr3-46404728-46408379	1.04712e-47	0.573917	0.272	0.058	1.44994e-42	CCRL2	0
chr9-93111367-93122066	4.8046e-33	0.570169	0.336	0.126	6.65293e-28	CARD19	0
chr6-2852260-2855625	7.36336e-42	0.564413	0.292	0.077	1.01961e-36	SERPINB9P1	0
chr6-336035-342905	3.50881e-47	0.563617	0.289	0.065	4.85865e-42	DUSP22	0
chr12-55846905-55849802	3.47119e-60	0.561622	0.247	0.038	4.80656e-55	MMP19	3938
chr7-151793390-151798292	1.27023e-32	0.561086	0.314	0.112	1.75889e-27	PRKAG2	0
chr11-47390738-47395821	2.41269e-55	0.546518	0.229	0.034	3.34085e-50	SLC39A13	11310
chr20-37335639-37337902	1.79707e-52	0.540663	0.229	0.035	2.4884e-47	SRC	6782
chr6-14120479-14124298	4.20488e-53	0.535856	0.22	0.031	5.8225e-48	CD83	0
chr10-71887861-71890728	3.07114e-46	0.533478	0.258	0.053	4.25261e-41	RP11-472G21.2	8753
chr7-112080342-112082680	1.3457e-66	0.529134	0.227	0.024	1.86339e-61	DOCK4	0
chr9-131627411-131631272	1.24155e-28	0.519667	0.27	0.088	1.71917e-23	RAPGEF1	0
chr14-105068782-105071362	2.23782e-50	0.519444	0.234	0.039	3.0987e-45	GPR132	3336
chr22-21936228-21940987	1.34361e-28	0.51926	0.279	0.095	1.86049e-23	PPM1F	0
chr1-66394994-66398305	2.00051e-58	0.513817	0.216	0.024	2.7701e-53	PDE4B	20414
chr16-87953391-87957485	1.90493e-34	0.512256	0.26	0.074	2.63775e-29	BANP	0
chr4-2790670-2802246	6.29877e-20	0.508579	0.345	0.172	8.72191e-15	SH3BP2	0
chr7-20217139-20221576	7.40644e-31	0.504554	0.289	0.099	1.02557e-25	MACC1	0
chr1-156133598-156158080	7.33697e-18	0.503536	0.434	0.253	1.01595e-12	SEMA4A	0
chr1-220876533-220881792	1.76087e-35	0.503534	0.234	0.057	2.43828e-30	HLX	0
chr19-49893965-49898339	1.39816e-28	0.502072	0.267	0.09	1.93603e-23	IL4I1	0
chr8-22547466-22555246	2.35083e-31	0.492758	0.254	0.077	3.2552e-26	SORBS3	0
chr4-81504404-81507302	6.9838e-44	0.490452	0.216	0.036	9.67047e-39	RASGEF1B	0
chr11-60949682-60954877	4.31383e-34	0.489982	0.27	0.085	5.97336e-29	SLC15A3	0
chr11-60375445-60378842	2.69024e-61	0.488202	0.214	0.022	3.72517e-56	MS4A7	0
chr1-27630799-27635423	1.21258e-37	0.487009	0.229	0.052	1.67906e-32	FGR	0
chr17-8963540-8968337	6.65609e-35	0.485888	0.232	0.057	9.21668e-30	PIK3R5	0
chr20-46007600-46012270	3.48195e-28	0.484186	0.243	0.078	4.82146e-23	MMP9	0
chr10-79241487-79250825	5.50225e-21	0.48287	0.332	0.153	7.61896e-16	ZMIZ1	0
chr22-44023625-44027670	1.03886e-35	0.481722	0.254	0.066	1.43852e-30	PARVB	0
chr6-44063810-44068693	2.93229e-35	0.471408	0.247	0.065	4.06034e-30	RP5-1120P11.3	5219
chr19-35898360-35905749	6.36598e-18	0.470948	0.316	0.153	8.81498e-13	TYROBP	0
chr1-236146701-236152048	9.55348e-45	0.469856	0.203	0.031	1.32287e-39	GPR137B	0
chr1-27884076-27888074	2.61949e-40	0.46958	0.2	0.034	3.6272e-35	THEMIS2	0
chr3-13011365-13016869	3.82614e-23	0.462895	0.31	0.127	5.29806e-18	IQSEC1	0
chr19-10283100-10293910	1.19211e-20	0.461551	0.37	0.193	1.65071e-15	ICAM1	0
chr20-37269612-37271485	3.32723e-44	0.460718	0.201	0.034	4.60722e-39	GHRH	7776
chr1-66330216-66337618	2.71585e-23	0.459084	0.338	0.143	3.76064e-18	PDE4B	0
chr3-72100039-72102760	1.33889e-40	0.457377	0.212	0.038	1.85396e-35	LINC00877	0
chr14-103121021-103124532	6.91327e-34	0.454698	0.227	0.059	9.57281e-29	TNFAIP2	0
chr13-99309937-99313832	1.0825e-32	0.454356	0.203	0.044	1.49893e-27	UBAC2	0
chr7-55531605-55539935	9.79937e-19	0.451499	0.354	0.18	1.35692e-13	VOPP1	0
chr5-172763619-172774146	8.38228e-17	0.450922	0.554	0.373	1.16069e-11	DUSP1	0
chr12-111402754-111408257	4.57222e-21	0.449369	0.325	0.152	6.33115e-16	SH2B3	0
chr11-117999587-118008521	3.32711e-22	0.447461	0.265	0.102	4.60705e-17	IL10RA	0
chr20-37314766-37318673	8.032e-45	0.445073	0.205	0.031	1.11219e-39	MANBAL	0
chr3-119584912-119590151	3.39252e-43	0.442995	0.2	0.032	4.69763e-38	ADPRH	0
chr11-72735555-72742559	2.69559e-24	0.440729	0.261	0.094	3.73258e-19	ARAP1	0
chr19-54207290-54211579	4.28834e-27	0.437519	0.234	0.072	5.93806e-22	RPS9	0
chr2-144514730-144524818	1.51635e-19	0.436032	0.301	0.133	2.09969e-14	ZEB2	0
chr20-1893667-1898835	7.8113e-29	0.434974	0.229	0.068	1.08163e-23	SIRPA	0
chr19-12781544-12787336	6.26775e-15	0.434598	0.299	0.149	8.67896e-10	HOOK2	0
chr17-45221264-45232108	1.94306e-16	0.433839	0.385	0.206	2.69055e-11	FMNL1	0
chr18-9705223-9713126	1.0351e-30	0.433205	0.24	0.066	1.4333e-25	RAB31	0
chr2-68737289-68743526	2.01121e-23	0.432438	0.229	0.074	2.78493e-18	ARHGAP25	0
chr17-76491524-76494510	4.71291e-29	0.431651	0.236	0.068	6.52597e-24	RHBDF2	0
chr19-2474448-2480130	2.97478e-16	0.430594	0.334	0.172	4.11918e-11	GADD45B	0
chr6-89032574-89038045	3.0316e-24	0.429802	0.278	0.106	4.19785e-19	PNRC1	42705
chr22-50298634-50309817	7.69973e-21	0.428718	0.312	0.143	1.06618e-15	PLXNB2	0
chr21-33400951-33405798	1.27722e-26	0.428238	0.256	0.088	1.76857e-21	IFNGR2	0
chr17-1107491-1112378	1.71475e-23	0.425678	0.267	0.1	2.37442e-18	ABR	0
chr12-111396680-111399887	2.11733e-27	0.425639	0.22	0.065	2.93187e-22	RP3-473L9.4	0
chr1-201708909-201716538	1.53882e-22	0.424884	0.272	0.112	2.13081e-17	NAV1	0
chr9-93122634-93138501	1.51142e-13	0.423987	0.387	0.224	2.09287e-08	NINJ1	0
chr6-81749031-81754525	5.83767e-21	0.423835	0.283	0.114	8.08342e-16	FAM46A	0
chr22-24399977-24403311	2.23088e-29	0.422722	0.232	0.065	3.0891e-24	SPECC1L	0
chr1-32330904-32340142	5.0673e-21	0.421041	0.299	0.13	7.01669e-16	HDAC1	0
chr1-159825550-159831014	4.19937e-25	0.420159	0.207	0.06	5.81486e-20	SLAMF8	0
chr17-58327653-58340507	3.16204e-15	0.419828	0.423	0.235	4.37848e-10	TSPOAP1	0
chr11-76626754-76630885	4.53496e-34	0.417567	0.214	0.046	6.27956e-29	RP11-672A2.5	0
chr5-150396743-150405237	1.46646e-15	0.417254	0.23	0.1	2.0306e-10	CD74	0
chr19-48962120-48970161	9.3052e-16	0.417216	0.307	0.153	1.28849e-10	FTL	0
chr10-69064200-69066542	1.57326e-30	0.417153	0.212	0.056	2.17849e-25	KIF1BP	20655
chr11-2926545-2934185	2.29577e-18	0.415664	0.296	0.137	3.17895e-13	PHLDA2	0
chr17-7833426-7845483	3.87101e-10	0.414027	0.539	0.385	5.36019e-05	DNAH2	0
chr6-159691019-159694736	1.23603e-17	0.413136	0.263	0.115	1.71153e-12	SOD2	0
chr19-2092064-2097769	4.40132e-16	0.412113	0.31	0.157	6.0945e-11	IZUMO4	0
chr17-7577786-7582490	2.64678e-22	0.412093	0.23	0.082	3.665e-17	CD68	0
chr20-23081657-23088286	5.14055e-37	0.412034	0.209	0.041	7.11812e-32	CD93	0
chr1-234977952-234981448	2.87141e-23	0.411193	0.276	0.108	3.97605e-18	RP11-443B7.3	0
chr12-52005640-52008163	2.53949e-27	0.411146	0.205	0.054	3.51643e-22	GRASP	0
chr17-78168127-78175499	1.63133e-18	0.410425	0.232	0.089	2.2589e-13	TK1	0
chr1-156487601-156493446	2.30968e-24	0.407608	0.223	0.067	3.19821e-19	MEF2D	0
chr18-76490517-76497289	2.72201e-14	0.407298	0.258	0.124	3.76916e-09	ZNF516	0
chr3-52243591-52247676	3.6663e-21	0.405999	0.245	0.092	5.07673e-16	PPM1M	0
chr19-10268186-10272469	5.00447e-17	0.404732	0.276	0.127	6.92969e-12	ICAM1	0
chr6-44056781-44063183	2.35111e-20	0.402589	0.258	0.106	3.25559e-15	RP5-1120P11.3	10729
chr6-137866051-137885785	1.35638e-07	0.401311	0.495	0.36	0.0187818	TNFAIP3	0
chr6-109454161-109459610	1.68451e-19	0.401217	0.254	0.101	2.33254e-14	MICAL1	0
chr1-206767863-206774736	4.59567e-24	0.400098	0.205	0.06	6.36363e-19	IL10	0
chr7-129143903-129148199	1.10623e-27	0.398823	0.201	0.051	1.5318e-22	TSPAN33	0
chr16-11179458-11184367	8.25969e-25	0.397795	0.203	0.061	1.14372e-19	CLEC16A	0
chr11-10897530-10901174	2.05459e-18	0.397509	0.214	0.079	2.84499e-13	CTD-2003C8.2	0
chr15-70140316-70143356	4.47275e-28	0.395699	0.216	0.06	6.19342e-23	TLE3	42139
chr11-61961491-61970564	2.53558e-15	0.393979	0.336	0.182	3.51101e-10	FTH1	0
chr2-69942978-69948646	1.08792e-21	0.393503	0.261	0.097	1.50644e-16	MXD1	32
chr15-70507589-70510260	2.59067e-24	0.391987	0.2	0.058	3.58731e-19	RP11-96C21.1	1660
chr6-134167583-134178928	6.70696e-13	0.386738	0.327	0.184	9.28712e-08	SGK1	0
chr20-4811420-4816070	1.42119e-18	0.385575	0.236	0.089	1.96792e-13	RASSF2	0
chr1-30753583-30758289	1.25452e-19	0.385023	0.241	0.09	1.73714e-14	LAPTM5	0
chr11-3836789-3842416	1.32127e-13	0.384816	0.312	0.166	1.82956e-08	RHOG	0
chr1-206579589-206584284	6.99672e-18	0.382556	0.254	0.104	9.68835e-13	RASSF5	0
chr5-170266427-170272727	2.06328e-20	0.381972	0.236	0.087	2.85702e-15	LCP2	0
chr19-17946240-17953181	6.15843e-18	0.381832	0.236	0.094	8.52758e-13	KCNN1	0
chr6-159978359-159985850	2.74983e-15	0.381443	0.269	0.126	3.80769e-10	IGF2R	0
chr12-111773310-111777978	5.3186e-23	0.377951	0.223	0.076	7.36467e-18	ALDH2	0
chr2-85412564-85416729	1.03152e-19	0.376814	0.209	0.074	1.42834e-14	CAPG	0
chr10-128061993-128065556	9.58962e-18	0.376519	0.238	0.095	1.32787e-12	PTPRE	0
chr17-83198789-83201565	2.44503e-21	0.373977	0.211	0.07	3.38564e-16	AC139099.6	10430
chr8-143544178-143550112	3.35834e-17	0.368593	0.252	0.108	4.65029e-12	ZC3H3	2724
chr1-154403150-154408812	4.6293e-14	0.367532	0.289	0.145	6.41018e-09	IL6R	0
chr6-113854614-113860119	4.75472e-17	0.365978	0.261	0.111	6.58386e-12	MARCKS	0
chr7-151084808-151090164	1.63083e-21	0.363983	0.234	0.085	2.25821e-16	AGAP3	0
chr1-192575171-192582077	2.89674e-13	0.363275	0.287	0.135	4.01112e-08	RGS1	0
chr11-35082115-35084350	1.63517e-17	0.362169	0.227	0.089	2.26422e-12	CD44	54519
chr9-110253520-110259640	9.09131e-12	0.361713	0.325	0.194	1.25887e-06	TXN	0
chr17-40316271-40328104	2.22691e-08	0.360423	0.385	0.257	0.00308361	RARA	0
chr8-1744687-1747217	4.28754e-18	0.35917	0.209	0.079	5.93696e-13	CLN8	8560
chr7-2527415-2532277	5.82626e-13	0.356702	0.267	0.133	8.06763e-08	LFNG	0
chr14-35396625-35407648	1.91291e-09	0.354422	0.475	0.334	0.000264881	NFKBIA	0
chr7-140314260-140318101	1.08404e-15	0.353589	0.209	0.081	1.50106e-10	SLC37A3	0
chr22-35350149-35353706	9.18826e-18	0.351789	0.225	0.09	1.2723e-12	TOM1	2154
chr11-78416190-78421466	8.51798e-15	0.351524	0.258	0.119	1.17948e-09	GAB2	0
chr18-13566427-13569512	1.90723e-16	0.351402	0.209	0.077	2.64095e-11	LDLRAD4	0
chr7-106344271-106347980	6.09786e-14	0.349752	0.229	0.098	8.44371e-09	NAMPT	57944
chr5-150485332-150490640	1.13054e-19	0.347297	0.211	0.076	1.56546e-14	NDST1	0
chr14-105063117-105067757	1.07725e-12	0.347295	0.207	0.089	1.49167e-07	GPR132	0
chr14-35365018-35368989	5.74574e-16	0.346483	0.211	0.087	7.95613e-11	RP11-561B11.3	1389
chr10-30432741-30438767	3.09307e-10	0.344619	0.287	0.164	4.28297e-05	MAP3K8	0
chr3-183551911-183556382	3.63902e-17	0.342887	0.201	0.07	5.03895e-12	KLHL6	0
chr17-64984316-64986882	3.96569e-15	0.342347	0.227	0.094	5.49129e-10	GNA13	23832
chr6-30740995-30745100	3.24827e-12	0.341119	0.252	0.126	4.49787e-07	FLOT1	0
chr14-92649585-92654674	1.50438e-16	0.341033	0.2	0.075	2.08312e-11	RIN3	0
chr19-34999145-35001894	9.81055e-17	0.34069	0.207	0.079	1.35847e-11	GRAMD1A	0
chr4-81468733-81473691	1.48723e-09	0.340191	0.296	0.173	0.000205937	RASGEF1B	0
chr12-124388162-124393568	1.93484e-16	0.339236	0.203	0.077	2.67918e-11	NCOR2	0
chr9-104989659-104994100	3.74606e-12	0.338698	0.243	0.123	5.18717e-07	RP11-217B7.3	0
chr3-42012211-42016144	1.87595e-15	0.338221	0.209	0.085	2.59763e-10	TRAK1	0
chr7-102424643-102427391	2.52038e-14	0.335594	0.2	0.079	3.48997e-09	PRKRIP1	0
chr22-50537924-50543081	1.63014e-07	0.335498	0.278	0.172	0.0225725	CTA-384D8.34	0
chr7-128937406-128941458	1.11622e-20	0.334944	0.2	0.062	1.54563e-15	IRF5	0
chr19-41321558-41329381	3.24004e-09	0.334879	0.289	0.174	0.000448649	CCDC97	0
chr9-131666755-131671683	1.44033e-11	0.334132	0.236	0.111	1.99443e-06	RAPGEF1	0
chr9-131730476-131737613	1.14672e-11	0.331934	0.276	0.144	1.58787e-06	RAPGEF1	0
chr12-12006803-12011904	6.45555e-11	0.331445	0.214	0.099	8.939e-06	BCL2L14	37939
chr11-69296497-69299343	2.77299e-15	0.327699	0.221	0.097	3.83976e-10	MYEOV	0
chr21-25559703-25564193	2.49186e-13	0.326821	0.201	0.087	3.45048e-08	MIR155HG	0
chr4-102759675-102761810	7.98604e-12	0.326466	0.22	0.105	1.10583e-06	MANBA	0
chr22-49959418-49968955	3.04047e-10	0.325152	0.309	0.186	4.21013e-05	PIM3	0
chr17-42286117-42290866	1.65473e-13	0.324462	0.234	0.106	2.2913e-08	STAT5A	0
chr19-44843766-44850612	7.20137e-14	0.324435	0.269	0.128	9.97174e-09	NECTIN2	0
chr11-117814566-117819521	8.54862e-09	0.322713	0.243	0.129	0.00118373	DSCAML1	0
chr3-11287895-11292068	9.27354e-13	0.318284	0.216	0.1	1.28411e-07	ATG7	0
chr9-133112093-133116603	1.5326e-13	0.315455	0.22	0.097	2.12219e-08	RALGDS	0
chr1-12165252-12175560	4.82191e-09	0.315272	0.285	0.162	0.00066769	TNFRSF1B	0
chr5-151092635-151095974	1.26345e-14	0.314899	0.218	0.093	1.7495e-09	TNIP1	0
chr11-117985588-117990234	2.92334e-10	0.31479	0.238	0.131	4.04795e-05	IL10RA	0
chr11-65496431-65511284	1.8855e-06	0.314592	0.445	0.337	0.261085	AP000769.1	0
chr22-37606870-37611602	6.26954e-10	0.313804	0.298	0.17	8.68143e-05	GGA1	0
chr10-102641717-102649636	1.28049e-06	0.313444	0.365	0.24	0.177309	TRIM8	0
chr4-80069866-80074643	1.58329e-10	0.312436	0.201	0.096	2.19238e-05	ANTXR2	0
chr19-43667715-43670932	3.8838e-09	0.312353	0.289	0.17	0.00053779	PLAUR	0
chr2-96140953-96149311	5.32702e-07	0.311713	0.365	0.237	0.0737633	DUSP2	0
chr13-114063599-114069430	1.11975e-09	0.309772	0.289	0.163	0.000155052	RASA3	0
chr19-10401049-10406052	2.85046e-12	0.309609	0.26	0.131	3.94704e-07	CDC37	0
chr8-143947872-143954294	2.53952e-06	0.309402	0.323	0.219	0.351648	PLEC	0
chr5-178234246-178242171	2.2711e-12	0.307624	0.2	0.085	3.14479e-07	COL23A1	0
chr19-2167333-2169697	9.04927e-14	0.305778	0.212	0.091	1.25305e-08	DOT1L	0
chr21-43725503-43729843	5.59405e-14	0.304553	0.205	0.088	7.74608e-09	PDXK	0
chr10-17226900-17235825	7.44061e-09	0.304553	0.352	0.219	0.0010303	VIM	0
chr1-161066431-161070800	1.7311e-11	0.304359	0.201	0.089	2.39705e-06	ARHGAP30	0
chr17-64776395-64782050	2.69146e-11	0.303848	0.223	0.114	3.72686e-06	RP13-104F24.2	0
chr1-150548502-150553169	6.82065e-14	0.302722	0.2	0.083	9.44456e-09	ADAMTSL4	0
chr17-4898666-4904013	2.31484e-13	0.302663	0.225	0.101	3.20535e-08	C17orf107	0
chr6-290372-293962	1.06145e-08	0.302515	0.281	0.167	0.00146979	DUSP22	0
chr3-172133844-172139496	7.47515e-16	0.30114	0.212	0.086	1.03508e-10	FNDC3B	0
chr9-107486739-107491469	9.78365e-10	0.30057	0.227	0.118	0.000135474	KLF4	0
chr6-30678896-30689188	6.6733e-07	0.300285	0.385	0.266	0.0924052	PPP1R18	0
chr11-10302356-10309949	3.7564e-09	0.299385	0.283	0.166	0.000520149	ADM	0
chr19-48871841-48885607	6.97091e-06	0.299014	0.407	0.296	0.965262	PPP1R15A	0
chr2-233059582-233065003	2.77562e-12	0.298669	0.2	0.087	3.84341e-07	INPP5D	0
chr6-33311838-33315531	5.7578e-08	0.298288	0.261	0.156	0.00797283	TAPBP	0
chr8-55988480-55992389	1.39538e-11	0.298237	0.22	0.098	1.93219e-06	LYN	0
chr10-79283903-79288778	3.14438e-11	0.298095	0.223	0.108	4.35403e-06	ZMIZ1	0
chr19-12788369-12797313	5.48079e-06	0.29795	0.416	0.31	0.758924	PRDX2	0
chr19-1247843-1254621	2.70161e-07	0.297645	0.312	0.197	0.0374092	MIDN	0
chr17-77318478-77326265	1.59885e-09	0.297504	0.296	0.176	0.000221393	SEPT9	0
chr2-96527103-96540585	8.74638e-07	0.29552	0.379	0.263	0.121111	ARID5A	0
chr19-39397020-39399197	5.18325e-12	0.293302	0.209	0.094	7.17725e-07	MED29	0
chr4-105144723-105148358	2.27623e-10	0.293177	0.203	0.104	3.1519e-05	TET2	0
chr10-79263216-79269095	6.61204e-13	0.291686	0.211	0.091	9.1557e-08	ZMIZ1	0
chr11-65491074-65494984	3.03051e-09	0.291467	0.221	0.116	0.000419634	MALAT1	2777
chr7-44976959-44983291	4.19006e-05	0.290754	0.328	0.227	1	MYO1G	0
chr17-78349488-78361393	1.52948e-07	0.289546	0.428	0.301	0.0211787	SOCS3	0
chr3-16509735-16515206	3.08413e-08	0.288397	0.241	0.137	0.00427059	RFTN1	0
chr6-144149542-144154330	6.32668e-10	0.287362	0.256	0.139	8.76056e-05	STX11	0
chr1-203286112-203291649	2.06448e-06	0.287296	0.33	0.213	0.285869	LINC01353	0
chr15-91852462-91858356	1.53388e-09	0.286357	0.223	0.114	0.000212396	SLCO3A1	0
chr8-21908762-21915901	8.63659e-11	0.285974	0.234	0.114	1.19591e-05	DOK2	0
chr1-116567729-116572723	8.07997e-08	0.285474	0.232	0.133	0.0111883	CD58	0
chr6-3022164-3025882	4.313e-11	0.284776	0.225	0.115	5.97222e-06	NQO2	0
chr12-11648544-11653926	2.22148e-08	0.282501	0.256	0.151	0.00307608	ETV6	0
chr15-64891427-64897994	2.01001e-06	0.282213	0.289	0.175	0.278326	AC069368.3	0
chr3-39145777-39154831	1.20396e-05	0.282088	0.434	0.327	1	CSRNP1	0
chr13-50121576-50131737	2.84367e-06	0.280383	0.359	0.244	0.393763	DLEU1	0
chr12-14955900-14962433	3.43535e-09	0.279935	0.27	0.15	0.000475692	ARHGDIB	0
chr9-131655304-131659060	9.51857e-11	0.279363	0.207	0.101	1.31804e-05	RAPGEF1	0
chr1-150610925-150614611	3.05168e-08	0.277419	0.249	0.142	0.00422566	ENSA	0
chr10-78972270-78976472	1.00453e-09	0.27657	0.214	0.109	0.000139097	RP11-481G8.2	24011
chr7-140229117-140233467	7.7916e-10	0.275157	0.203	0.099	0.00010789	KDM7A	52081
chr3-105365311-105370218	1.37669e-06	0.274562	0.316	0.213	0.19063	ALCAM	0
chr22-37241260-37245415	6.18138e-08	0.273198	0.225	0.125	0.00855935	RAC2	0
chr17-2395847-2402869	1.38481e-06	0.271126	0.363	0.258	0.191754	MNT	0
chr9-113150487-113156837	1.0978e-06	0.270551	0.26	0.161	0.152013	SLC31A2	0
chr6-32194907-32198436	2.75817e-07	0.268567	0.274	0.166	0.0381923	NOTCH4	0
chr15-45454010-45459196	1.4791e-07	0.268328	0.245	0.148	0.0204811	C15orf48	5248
chr11-62537347-62550144	1.51186e-05	0.267485	0.388	0.285	1	AHNAK	0
chr12-124912773-124922214	0.000656577	0.266742	0.468	0.372	1	UBC	0
chr5-100899872-100905687	7.97343e-06	0.265837	0.292	0.189	1	ST8SIA4	0
chr1-207822483-207827253	4.51758e-09	0.265603	0.256	0.138	0.000625549	C1orf132	0
chr15-64881910-64884685	5.50116e-07	0.265485	0.205	0.116	0.0761746	AC069368.3	0
chr5-95820840-95825113	9.71058e-09	0.265454	0.201	0.107	0.00134462	RHOBTB3	0
chr3-10191348-10197121	9.4048e-08	0.264222	0.26	0.158	0.0130228	IRAK2	0
chr1-151055637-151060724	5.47449e-09	0.26385	0.258	0.147	0.000758053	CDC42SE1	0
chr9-133118881-133123768	4.70266e-07	0.263816	0.214	0.123	0.0651177	RALGDS	0
chr20-832968-837305	5.70677e-06	0.263355	0.223	0.133	0.790217	FAM110A	0
chr6-89078926-89083582	9.11932e-07	0.26281	0.281	0.176	0.126275	PNRC1	0
chr17-38698716-38707344	1.57208e-06	0.262666	0.339	0.226	0.217686	MLLT6	0
chr18-13610498-13617185	2.95132e-07	0.260835	0.238	0.131	0.0408669	LDLRAD4	0
chr22-50522683-50534831	3.15897e-05	0.260488	0.388	0.282	1	SCO2	0
chr1-156113083-156131066	0.00207212	0.260248	0.466	0.385	1	LMNA	0
chr3-187735813-187747308	5.99504e-06	0.258434	0.367	0.27	0.830134	RP11-211G3.2	0
chr9-120924515-120929812	3.9381e-06	0.257758	0.272	0.177	0.545308	TRAF1	0
chr3-71579560-71586933	1.34463e-07	0.256668	0.203	0.11	0.0186191	FOXP1	0
chr3-127588277-127592495	2.25298e-06	0.256255	0.265	0.165	0.31197	TPRA1	0
chr2-8542582-8546008	2.93915e-08	0.256136	0.238	0.13	0.00406985	AC011747.3	0
chr1-37471059-37482221	0.000344181	0.255565	0.412	0.321	1	ZC3H12A	0
chr10-110495643-110504916	9.27747e-06	0.255442	0.323	0.216	1	DUSP5	0
chr15-64840822-64847490	5.4795e-09	0.254063	0.229	0.123	0.000758746	PLEKHO2	0
chr9-93092718-93099500	2.09169e-05	0.254034	0.343	0.25	1	CARD19	0
chr7-150377167-150380576	3.49014e-09	0.253739	0.203	0.1	0.00048328	ZNF775	0
chr12-55726443-55731237	8.01739e-07	0.253542	0.216	0.129	0.111017	CD63	0
chr20-33810700-33813399	1.4884e-06	0.251807	0.232	0.145	0.206098	CHMP4B	0
chr20-23046486-23052027	4.93875e-08	0.250139	0.207	0.113	0.00683869	THBD	0
chr19-40600711-40606754	5.39439e-12	-0.251395	0.105	0.205	7.46961e-07	LTBP4	0
chr20-45336372-45349001	1.11417e-08	-0.251395	0.142	0.22	0.0015428	SDC4	0
chr7-24978357-24983145	9.48552e-09	-0.25771	0.176	0.259	0.00131346	OSBPL3	0
chr11-57321143-57326267	8.30081e-11	-0.277709	0.103	0.2	1.14941e-05	TNKS1BP1	0
chr9-71761838-71770551	1.21827e-13	-0.293547	0.134	0.242	1.68694e-08	TMEM2	0
chr17-81080227-81098476	1.02021e-09	-0.309996	0.192	0.287	0.000141268	BAIAP2	0
chr14-99264696-99275193	8.01429e-37	-0.492696	0.027	0.202	1.10974e-31	BCL11B	0

## Sheet: Fibroblast
	p_val	avg_log2FC	pct.1	pct.2	p_val_adj	gene	distance
chr1-156113083-156131066	1.31755e-08	0.817692	0.683	0.383	0.00182441	LMNA	0
chr10-104299081-104301425	1.24912e-40	0.773896	0.29	0.012	1.72966e-35	GSTO2	0
chr11-33689088-33692621	1.18871e-22	0.764777	0.339	0.051	1.64601e-17	CD59	5639
chr8-22596803-22601522	2.0138e-13	0.749382	0.398	0.118	2.78851e-08	C8orf58	0
chr1-23554276-23562799	4.05153e-08	0.747267	0.457	0.189	0.00561016	ID3	0
chr21-26842791-26846844	1.14919e-21	0.695945	0.349	0.058	1.59129e-16	ADAMTS1	0
chr11-10302356-10309949	4.35942e-08	0.692804	0.419	0.17	0.00603649	ADM	0
chr19-15248801-15252780	4.95423e-20	0.688895	0.253	0.033	6.86012e-15	BRD4	0
chr1-156133598-156158080	2.57169e-06	0.685448	0.489	0.264	0.356102	SEMA4A	0
chr1-156100129-156107783	3.5786e-09	0.683961	0.468	0.196	0.000495528	LMNA	0
chr14-77037930-77047283	1.81602e-07	0.670221	0.409	0.175	0.0251464	RP11-7F17.5	0
chr11-75560686-75566425	2.625e-11	0.667573	0.376	0.12	3.63484e-06	SERPINH1	0
chr1-44799462-44814302	7.37781e-05	0.655491	0.634	0.378	1	BTBD19	0
chr1-154970500-154976430	8.01932e-08	0.647465	0.548	0.255	0.0111044	SHC1	0
chr10-110495643-110504916	1.16554e-06	0.642769	0.473	0.219	0.161393	DUSP5	0
chr14-75276552-75285117	3.54892e-05	0.642275	0.505	0.275	1	FOS	0
chr1-161196796-161203163	1.12375e-07	0.638665	0.425	0.189	0.0155606	NDUFS2	0
chr12-53045299-53052811	3.87373e-13	0.627923	0.382	0.108	5.36395e-08	TNS2	0
chr15-48644519-48646423	2.37213e-25	0.627817	0.226	0.015	3.28469e-20	FBN1	0
chr19-44843766-44850612	3.24171e-05	0.623985	0.339	0.136	1	NECTIN2	0
chr17-7833426-7845483	0.000461548	0.623809	0.624	0.393	1	DNAH2	0
chr14-21068379-21072615	2.96829e-09	0.623658	0.317	0.098	0.000411019	ARHGEF40	0
chr21-45972856-45975518	2.30868e-19	0.622577	0.28	0.041	3.19683e-14	AJ011932.1	0
chr14-24365521-24368849	8.08044e-13	0.62233	0.29	0.068	1.1189e-07	NFATC4	0
chr2-231611171-231615675	8.0577e-07	0.621776	0.392	0.176	0.111575	C2orf57	16887
chr19-49361348-49364219	1.68918e-13	0.621074	0.28	0.064	2.33901e-08	DKKL1	0
chr2-218322102-218324601	6.69239e-15	0.621052	0.247	0.043	9.26696e-10	PNKD	0
chr19-8525155-8526747	3.67369e-17	0.618155	0.296	0.057	5.08696e-12	MYO1F	0
chr11-6318969-6322557	1.87598e-13	0.61288	0.317	0.083	2.59767e-08	PRKCDBP	0
chr14-103121021-103124532	3.86841e-11	0.612406	0.296	0.069	5.35659e-06	TNFAIP2	0
chr20-62356935-62359983	2.21883e-27	0.610736	0.226	0.014	3.07241e-22	LAMA5	0
chr5-151739725-151743405	1.43414e-15	0.608149	0.28	0.047	1.98585e-10	ATOX1	0
chr3-194132289-194142788	0.000891248	0.607952	0.425	0.227	1	HES1	0
chr3-159761432-159767006	3.94046e-05	0.606995	0.366	0.162	1	IQCJ-SCHIP1	0
chr19-3403503-3405325	2.47483e-25	0.606487	0.242	0.018	3.4269e-20	NFIC	0
chr1-21261191-21263145	3.64001e-22	0.603419	0.247	0.024	5.04033e-17	ECE1	0
chr17-1713770-1718092	2.47184e-07	0.60204	0.489	0.223	0.0342275	WDR81	0
chr10-78972270-78976472	5.08887e-08	0.601459	0.355	0.111	0.00704656	RP11-481G8.2	24011
chr19-1247843-1254621	2.81018e-06	0.600945	0.435	0.201	0.389126	MIDN	0
chr1-94925199-94927768	2.59684e-16	0.59817	0.274	0.046	3.59585e-11	CNN3	0
chr11-45856931-45860190	3.69682e-15	0.596746	0.285	0.053	5.11899e-10	CRY2	0
chr11-65314203-65317608	4.0627e-11	0.59583	0.323	0.093	5.62562e-06	CDC42EP2	0
chr22-29305852-29311782	9.10554e-08	0.593053	0.323	0.114	0.0126084	GAS2L1	0
chr19-18414477-18421879	7.97024e-08	0.592197	0.339	0.12	0.0110364	SSBP4	0
chr11-841904-845209	1.2795e-08	0.591461	0.253	0.067	0.00177173	POLR2L	0
chr15-67105026-67111338	7.86887e-06	0.590383	0.301	0.125	1	SMAD3	0
chr10-97541838-97543793	3.10168e-13	0.589996	0.296	0.06	4.29489e-08	UBTD1	0
chr18-79393064-79397050	7.27551e-07	0.58835	0.317	0.118	0.100744	NFATC1	0
chr8-102727666-102731616	1.40813e-11	0.587611	0.285	0.062	1.94984e-06	KLF10	71763
chr12-13097343-13104822	1.05098e-05	0.586615	0.446	0.194	1	GSG1	0
chr17-78349488-78361393	0.000274362	0.585416	0.532	0.307	1	SOCS3	0
chr7-151084808-151090164	3.6183e-11	0.584099	0.339	0.092	5.01026e-06	AGAP3	0
chr1-16611089-16619061	9.3805e-07	0.58382	0.376	0.143	0.129892	NBPF1	0
chr17-76381117-76386838	2.14138e-05	0.583586	0.366	0.157	1	SPHK1	0
chr17-40316271-40328104	0.000219953	0.578564	0.5	0.262	1	RARA	0
chr10-93436053-93439495	2.71875e-13	0.578164	0.28	0.059	3.76465e-08	MYOF	0
chr11-114294653-114298775	4.98713e-12	0.576318	0.29	0.07	6.90568e-07	NNMT	0
chr9-130846114-130848438	7.17582e-16	0.57526	0.231	0.036	9.93635e-11	ABL1	0
chr7-1535710-1538422	4.14286e-15	0.572934	0.253	0.046	5.73662e-10	MAFK	0
chr6-142942764-142948313	7.74972e-05	0.5715	0.414	0.195	1	HIVEP2	0
chr17-15260261-15263677	7.06877e-13	0.570867	0.28	0.06	9.78812e-08	PMP22	0
chr17-81417034-81420663	9.28939e-10	0.569696	0.296	0.08	0.00012863	BAHCC1	0
chr19-3968484-3972263	1.38974e-09	0.567102	0.344	0.114	0.000192438	DAPK3	0
chr12-6763563-6769345	1.43527e-06	0.565653	0.366	0.149	0.198742	PTMS	0
chr3-149655809-149659227	4.15719e-08	0.563763	0.263	0.079	0.00575646	WWTR1	0
chr10-3467011-3469783	2.97166e-09	0.563755	0.274	0.076	0.000411485	RP11-482E14.1	17110
chr17-78882562-78884862	5.60999e-13	0.563654	0.231	0.039	7.76816e-08	CEP295NL	0
chr8-22392066-22394028	1.95009e-13	0.563401	0.231	0.043	2.7003e-08	SLC39A14	0
chr8-26608217-26612101	1.86954e-13	0.563177	0.28	0.053	2.58875e-08	DPYSL2	0
chr20-51445971-51448092	1.93318e-18	0.559347	0.269	0.038	2.67688e-13	NFATC2	0
chr4-125313393-125317977	2.85113e-12	0.557341	0.296	0.067	3.94796e-07	FAT4	0
chr18-55585779-55590413	6.17393e-14	0.557267	0.296	0.061	8.54905e-09	TCF4	0
chr3-187735813-187747308	0.0364639	0.557027	0.441	0.274	1	RP11-211G3.2	0
chr7-99140847-99145150	3.7024e-05	0.555352	0.387	0.183	1	SMURF1	0
chr18-3446415-3455126	0.000528554	0.551567	0.516	0.284	1	TGIF1	0
chr1-92783584-92786008	6.90405e-08	0.551335	0.285	0.082	0.00956004	EVI5	0
chr8-23335608-23336917	1.76296e-20	0.550731	0.226	0.023	2.44117e-15	LOXL2	0
chr1-81800180-81803847	9.71127e-17	0.549494	0.247	0.036	1.34472e-11	ADGRL2	0
chr19-13149388-13157516	0.00620702	0.549029	0.511	0.3	1	STX10	0
chr11-33699702-33702420	9.37494e-10	0.545586	0.317	0.094	0.000129815	C11orf91	0
chr22-29030484-29032053	5.61608e-31	0.54489	0.231	0.01	7.77659e-26	ZNRF3	0
chr6-30740995-30745100	3.76487e-07	0.541555	0.355	0.131	0.0521321	FLOT1	0
chr2-176138471-176141159	7.42788e-18	0.540909	0.237	0.029	1.02854e-12	HOXD3	0
chr1-7469059-7472081	1.48236e-12	0.54087	0.269	0.056	2.05262e-07	CAMTA1	0
chr5-34654865-34658274	4.24043e-13	0.539954	0.258	0.042	5.87172e-08	RAI14	0
chr1-67831181-67834082	1.15408e-09	0.538443	0.226	0.051	0.000159806	GNG12	0
chr22-49959418-49968955	0.000472972	0.537477	0.376	0.192	1	PIM3	0
chr21-44869676-44875782	1.60748e-05	0.537296	0.344	0.144	1	PTTG1IP	0
chr22-44363117-44364402	1.77898e-23	0.537121	0.215	0.017	2.46335e-18	RP1-32I10.10	1148
chr22-46068847-46072841	1.52682e-08	0.536126	0.274	0.079	0.00211419	RP6-109B7.4	0
chr10-102641717-102649636	5.83758e-05	0.536035	0.462	0.246	1	TRIM8	0
chr17-77318478-77326265	1.39269e-05	0.534958	0.409	0.18	1	SEPT9	0
chr6-111602035-111607056	1.47649e-05	0.533154	0.296	0.111	1	TRAF3IP2	0
chr4-140149933-140154922	5.09537e-07	0.532804	0.339	0.132	0.0705556	MAML3	0
chr6-144284075-144287585	2.24234e-07	0.532604	0.269	0.084	0.0310497	UTRN	0
chr20-32482485-32486244	2.33234e-07	0.531946	0.258	0.078	0.0322959	NOL4L	0
chr5-132494029-132501620	0.00525897	0.530658	0.403	0.23	1	IRF1	3230
chr5-150640103-150643189	1.62718e-09	0.530624	0.263	0.071	0.000225315	SYNPO	0
chr14-68939751-68940683	9.86166e-28	0.52975	0.21	0.01	1.36554e-22	ACTN1	0
chr1-21935388-21940320	6.69722e-08	0.529565	0.274	0.079	0.00927365	HSPG2	0
chr19-45767285-45771303	3.73314e-06	0.528006	0.382	0.166	0.516928	SIX5	0
chr11-12692712-12694478	2.7576e-20	0.527705	0.226	0.022	3.81845e-15	TEAD1	0
chr11-118618183-118623990	6.74554e-06	0.52711	0.285	0.106	0.934054	PHLDB1	0
chr9-127185938-127188179	3.3667e-16	0.526707	0.21	0.031	4.66186e-11	RALGPS1	0
chr8-141037636-141044220	2.31154e-07	0.525475	0.301	0.095	0.0320079	RP11-128L5.1	11069
chr14-105480570-105485039	6.32791e-05	0.525366	0.328	0.149	1	CRIP2	399
chr11-117094672-117099492	1.36476e-05	0.525258	0.349	0.152	1	SIK3	0
chr19-51687754-51691039	6.72303e-12	0.524685	0.242	0.049	9.30937e-07	SPACA6P-AS	0
chr1-112704255-112708460	8.46438e-06	0.524599	0.339	0.143	1	RP11-426L16.10	0
chr2-191244140-191248241	7.24132e-08	0.524241	0.274	0.081	0.0100271	MYO1B	0
chr14-52949436-52952289	5.30251e-12	0.523325	0.215	0.041	7.34239e-07	FERMT2	0
chr2-158967648-158970884	2.31659e-10	0.523016	0.242	0.059	3.20778e-05	TANC1	0
chr3-4866680-4869996	1.01263e-05	0.522924	0.296	0.117	1	ITPR1	18839
chr3-114623411-114625336	2.82131e-23	0.52237	0.22	0.016	3.90667e-18	ZBTB20	0
chr6-131949535-131951702	1.65475e-23	0.521398	0.22	0.019	2.29133e-18	CTGF	0
chr10-119206119-119210081	1.7122e-07	0.520895	0.317	0.122	0.0237088	GRK5	0
chr2-54634544-54635940	3.88013e-23	0.520116	0.226	0.017	5.37282e-18	SPTBN1	0
chr1-150558471-150580530	0.101717	0.518943	0.645	0.469	1	MCL1	0
chr17-78313615-78318162	5.3908e-06	0.51857	0.312	0.115	0.746464	AC061992.2	0
chr17-78933264-78934917	3.21256e-13	0.518391	0.231	0.044	4.44843e-08	TIMP2	7876
chr5-98768046-98775044	0.000579217	0.518087	0.323	0.15	1	RGMB	0
chr12-62702266-62704067	1.21894e-14	0.51808	0.21	0.03	1.68786e-09	PPM1H	0
chr19-10283100-10293910	0.00126659	0.517023	0.398	0.205	1	ICAM1	0
chr1-156052716-156056313	5.4399e-06	0.5168	0.366	0.157	0.753264	UBQLN4	0
chr17-7854869-7858848	5.35892e-05	0.516752	0.333	0.153	1	NAA38	0
chr9-35905401-35908858	2.21977e-11	0.516628	0.231	0.043	3.07371e-06	HRCT1	0
chr20-10670060-10675444	2.07912e-06	0.516323	0.376	0.149	0.287896	JAG1	0
chr1-150548502-150553169	7.29575e-08	0.516244	0.29	0.088	0.0101024	ADAMTSL4	0
chr2-188291376-188294031	9.26055e-22	0.516141	0.237	0.024	1.28231e-16	GULP1	0
chr12-47816829-47821776	4.46837e-06	0.515551	0.274	0.102	0.618735	HDAC7	0
chr10-127990136-127992051	9.38196e-14	0.515498	0.269	0.052	1.29912e-08	PTPRE	0
chr1-183021921-183026857	1.79034e-05	0.515187	0.269	0.092	1	LAMC1	0
chr11-65476337-65479914	2.74642e-06	0.515138	0.296	0.101	0.380297	CMB9-22P13.2	7326
chr14-105472628-105477941	5.17534e-08	0.514495	0.306	0.106	0.00716629	CRIP2	0
chr7-79451658-79454821	3.50252e-17	0.514181	0.226	0.027	4.84994e-12	MAGI2	0
chr19-1101251-1107953	0.000271744	0.51323	0.366	0.169	1	GPX4	0
chr3-125050523-125057907	8.16783e-05	0.513051	0.317	0.139	1	HEG1	0
chr2-73110654-73115050	8.01639e-08	0.512779	0.28	0.091	0.0111003	RAB11FIP5	0
chr6-43170195-43175275	0.0020365	0.512476	0.446	0.251	1	SRF	0
chr10-75294252-75296458	1.2477e-11	0.512186	0.242	0.053	1.72769e-06	ZNF503-AS1	0
chr9-95505690-95512094	3.29123e-05	0.512103	0.344	0.148	1	PTCH1	0
chr11-111734731-111736486	1.52806e-13	0.511818	0.226	0.039	2.1159e-08	PPP2R1B	0
chr9-128096844-128100404	2.04855e-07	0.510629	0.296	0.104	0.0283663	SLC25A25	0
chr6-6006350-6009585	1.61693e-11	0.510455	0.263	0.056	2.23896e-06	NRN1	0
chr3-14451986-14454056	2.73359e-18	0.509686	0.226	0.028	3.7852e-13	SLC6A6	0
chr19-53865180-53871935	0.000243263	0.509096	0.349	0.169	1	MYADM	0
chr20-31603892-31609288	2.14457e-05	0.50905	0.312	0.134	1	ID1	0
chr15-38128330-38131585	8.12666e-09	0.50886	0.269	0.069	0.0011253	RP11-346D14.1	8009
chr16-75244320-75246081	1.48337e-12	0.508627	0.215	0.033	2.05402e-07	BCAR1	0
chr10-102393582-102396578	0.000115712	0.508259	0.371	0.188	1	NFKB2	0
chr10-102116120-102121674	2.89728e-06	0.507676	0.328	0.129	0.401186	LDB1	0
chr22-37544072-37547521	7.87602e-09	0.506356	0.28	0.079	0.00109059	CDC42EP1	12925
chr3-129622434-129628519	7.20084e-07	0.506344	0.312	0.107	0.0997101	PLXND1	15615
chr12-130127582-130129328	7.5005e-20	0.505762	0.215	0.024	1.03859e-14	RP11-143E21.3	9364
chr5-132257205-132261386	1.79921e-08	0.505603	0.263	0.069	0.00249137	PDLIM4	0
chr17-2395847-2402869	0.00757901	0.504736	0.468	0.262	1	MNT	0
chr11-19711860-19715865	5.16872e-07	0.50465	0.242	0.071	0.0715713	NAV2	0
chr9-4296970-4300303	1.16607e-09	0.503945	0.22	0.052	0.000161466	GLIS3	0
chr2-47033290-47035768	6.99169e-07	0.502471	0.242	0.065	0.0968139	TTC7A	0
chr16-75156-79664	2.23985e-07	0.50211	0.204	0.054	0.0310152	MPG	0
chr9-106859888-106865163	9.84009e-09	0.501353	0.306	0.091	0.00136256	ZNF462	0
chr19-10268186-10272469	1.44774e-05	0.500553	0.333	0.136	1	ICAM1	0
chr9-127121716-127123980	1.13799e-17	0.499758	0.21	0.023	1.57577e-12	ANGPTL2	0
chr19-3428130-3430287	1.57317e-14	0.49944	0.21	0.034	2.17837e-09	NFIC	0
chr14-95514645-95520772	9.30768e-07	0.498177	0.328	0.13	0.128884	RP11-1070N10.3	0
chr11-61971138-61974182	3.17922e-07	0.49724	0.28	0.097	0.0440227	FTH1	3477
chr8-33564758-33567712	1.8846e-07	0.497013	0.269	0.087	0.0260961	RNF122	0
chr12-106245066-106250095	1.12081e-07	0.496929	0.317	0.114	0.0155199	CKAP4	0
chr16-56605911-56612087	0.00226255	0.4962	0.435	0.229	1	MT2A	0
chr17-56911655-56916419	0.000708764	0.495558	0.333	0.155	1	TRIM25	0
chr2-218003268-218006202	1.19124e-13	0.495551	0.226	0.04	1.64951e-08	TNS1	272
chr5-172450783-172456448	6.42631e-07	0.495409	0.29	0.092	0.0889851	SH3PXD2B	0
chr12-116454621-116456598	5.6005e-10	0.49514	0.237	0.049	7.75501e-05	RP11-148B3.1	61259
chr11-124896410-124901104	5.36813e-08	0.494359	0.237	0.066	0.00743325	ROBO4	0
chr17-75875380-75879590	6.35989e-05	0.494108	0.301	0.118	1	TRIM47	0
chr13-30869968-30871045	4.21934e-15	0.493571	0.204	0.029	5.84252e-10	LINC00545	11505
chr19-10007891-10010874	1.44721e-12	0.493454	0.22	0.038	2.00395e-07	COL5A3	0
chr12-93569280-93574359	5.85731e-05	0.493342	0.333	0.143	1	SOCS2	0
chr16-89920475-89926763	2.02917e-06	0.492668	0.366	0.144	0.280979	TUBB3	0
chr18-25350600-25352657	1.04553e-15	0.492513	0.204	0.027	1.44774e-10	ZNF521	0
chr10-3773592-3787283	0.0239975	0.491584	0.538	0.347	1	KLF6	0
chr17-7021674-7024900	7.94185e-07	0.49074	0.253	0.079	0.109971	BCL6B	0
chr17-43168815-43172646	0.000124999	0.490116	0.371	0.173	1	BRCA1	0
chr12-114681267-114685331	4.59251e-07	0.489924	0.274	0.087	0.0635924	TBX3	0
chr19-43532449-43534927	9.92202e-05	0.489289	0.285	0.124	1	ZNF575	0
chr13-80338625-80343511	6.97906e-06	0.487921	0.301	0.115	0.96639	SPRY2	0
chr2-64652056-64656249	6.23097e-06	0.48745	0.312	0.13	0.862803	SERTAD2	0
chr3-64685291-64686898	2.71235e-19	0.487001	0.21	0.021	3.75579e-14	ADAMTS9	0
chr19-38003105-38005357	7.13503e-09	0.487001	0.226	0.056	0.000987988	SIPA1L3	0
chr4-139175604-139179090	0.00122745	0.487001	0.339	0.159	1	ELF2	0
chr19-13829157-13844947	0.131846	0.485697	0.527	0.345	1	ZSWIM4	0
chr19-15448667-15453324	3.29397e-09	0.485473	0.247	0.066	0.000456116	RASAL3	0
chr1-201708909-201716538	0.00187493	0.48522	0.274	0.124	1	NAV1	0
chr16-10827532-10829963	3.93393e-09	0.484915	0.237	0.056	0.000544731	TVP23A	8737
chr12-6550346-6556766	6.78893e-06	0.484393	0.285	0.099	0.940063	IFFO1	0
chr22-46052332-46059029	1.03647e-06	0.48386	0.269	0.094	0.14352	PRR34	0
chr1-16143121-16147629	2.31413e-07	0.482482	0.247	0.073	0.0320438	EPHA2	0
chr10-72008862-72010312	7.47372e-16	0.481317	0.237	0.037	1.03489e-10	CHST3	0
chr11-73306231-73309703	0.00019462	0.481153	0.226	0.091	1	ARHGEF17	0
chr17-40540237-40543552	7.50348e-12	0.481032	0.253	0.056	1.03901e-06	CCR7	10216
chr14-22847598-22849743	1.3306e-10	0.479373	0.204	0.033	1.84248e-05	MMP14	0
chr10-17226900-17235825	0.00359972	0.478914	0.414	0.227	1	VIM	0
chr19-40714390-40721131	0.015827	0.478364	0.414	0.234	1	COQ8B	0
chr22-30286582-30291972	0.000246548	0.477813	0.317	0.147	1	RP1-130H16.18	0
chr1-225651512-225656145	5.75177e-08	0.477635	0.263	0.071	0.00796448	ENAH	0
chr11-118916562-118930895	0.0474826	0.475955	0.591	0.381	1	BCL9L	0
chr5-83472468-83474917	1.55809e-12	0.47555	0.247	0.045	2.15748e-07	VCAN	0
chr2-217992662-217996963	2.0894e-06	0.47461	0.226	0.07	0.289319	TNS1	0
chr20-51562011-51564313	4.73858e-13	0.474401	0.21	0.033	6.56151e-08	NFATC2	0
chr17-8150379-8157478	0.00151137	0.474401	0.446	0.252	1	PER1	0
chr19-13794330-13798423	1.04099e-05	0.474177	0.323	0.134	1	ZSWIM4	0
chr10-13346200-13350405	3.78724e-06	0.473663	0.253	0.085	0.52442	SEPHS1	0
chr3-50333939-50341980	4.15698e-05	0.473569	0.409	0.19	1	RASSF1	0
chr10-100996361-101001896	1.79123e-05	0.473365	0.296	0.115	1	LZTS2	0
chr4-183097707-183100312	6.94324e-09	0.473026	0.247	0.061	0.00096143	WWC2	0
chr10-75399185-75404789	1.91608e-06	0.472132	0.28	0.096	0.265319	ZNF503	0
chr7-130008788-130011353	8.02071e-08	0.471639	0.237	0.068	0.0111063	ZC3HC1	6932
chr15-75042728-75044304	3.06148e-10	0.470858	0.253	0.057	4.23923e-05	PPCDC	0
chr15-40905537-40907889	2.02868e-10	0.470461	0.231	0.047	2.80911e-05	RP11-540O11.1	0
chr2-217933108-217935680	1.93178e-08	0.470344	0.204	0.04	0.00267493	TNS1	0
chr3-134372406-134375631	4.17979e-09	0.470055	0.263	0.063	0.000578775	AMOTL2	0
chr19-6056399-6058134	3.18622e-09	0.469857	0.253	0.066	0.000441196	RFX2	0
chr3-172038906-172043083	1.51062e-06	0.469655	0.306	0.113	0.209175	FNDC3B	0
chr12-124421984-124423971	2.84622e-12	0.468806	0.226	0.045	3.94117e-07	NCOR2	0
chr6-79536528-79539031	3.10813e-06	0.468702	0.242	0.079	0.430382	LCA5	0
chr10-50621686-50625986	0.00139571	0.467831	0.349	0.17	1	SGMS1	0
chr2-46334036-46336800	2.20049e-14	0.467591	0.204	0.028	3.04702e-09	EPAS1	0
chr19-12788369-12797313	0.037836	0.467517	0.5	0.315	1	PRDX2	0
chr8-102804494-102811694	0.0612865	0.467182	0.452	0.29	1	KB-1732A1.1	0
chr10-119650706-119660343	0.000157006	0.466599	0.312	0.14	1	BAG3	0
chr6-37168719-37174632	0.00568272	0.466302	0.398	0.221	1	PIM1	0
chr5-116572415-116576655	5.48475e-07	0.465577	0.22	0.065	0.0759474	SEMA6A	0
chr1-46131655-46135707	7.15511e-05	0.465561	0.339	0.148	1	PIK3R3	0
chr10-122112381-122114081	6.49228e-17	0.465348	0.204	0.021	8.98986e-12	TACC2	0
chr12-108837874-108840225	1.46074e-08	0.46518	0.247	0.072	0.00202269	SSH1	0
chr14-85527826-85537112	0.00011912	0.465151	0.317	0.129	1	FLRT2	0
chr2-46296351-46300778	0.00022848	0.465079	0.301	0.13	1	EPAS1	0
chr7-1530078-1534500	0.00778203	0.464987	0.323	0.17	1	MAFK	0
chr3-146159976-146162057	2.94681e-09	0.46487	0.22	0.052	0.000408045	PLOD2	0
chr11-33721245-33724878	6.91656e-08	0.464676	0.263	0.069	0.00957737	CD59	0
chr10-86966114-86973349	0.000451247	0.464523	0.36	0.171	1	ADIRF	0
chr9-112072932-112075337	4.77482e-14	0.463277	0.21	0.031	6.61169e-09	SUSD1	0
chr17-868006-870710	1.87562e-11	0.462721	0.21	0.038	2.59718e-06	NXN	0
chr9-134640944-134644034	6.57806e-10	0.460852	0.226	0.047	9.10864e-05	COL5A1	0
chr12-57085176-57091149	0.0032098	0.460436	0.409	0.209	1	NAB2	0
chr11-9662176-9665111	4.18146e-11	0.460356	0.258	0.057	5.79007e-06	SWAP70	0
chr20-41316485-41319075	9.27777e-07	0.46029	0.274	0.091	0.128469	ZHX3	0
chr15-67146232-67151100	1.01375e-05	0.460151	0.28	0.098	1	SMAD3	0
chr2-102062146-102064880	7.69449e-08	0.459889	0.204	0.049	0.0106546	IL1R1	0
chr6-166626203-166628873	4.82977e-05	0.459199	0.301	0.131	1	RPS6KA2	0
chr11-69296497-69299343	0.00139118	0.458774	0.247	0.105	1	MYEOV	0
chr11-69442015-69445529	2.29347e-06	0.458739	0.215	0.061	0.317577	AP000439.2	0
chr15-70891217-70893330	4.98111e-10	0.458067	0.21	0.043	6.89735e-05	LRRC49	0
chr1-234721767-234727641	0.00182956	0.458006	0.328	0.159	1	LINC01132	0
chr2-231705316-231718180	0.0482196	0.457972	0.505	0.333	1	PTMA	0
chr11-61814166-61817352	5.68312e-06	0.457284	0.253	0.088	0.786942	FADS2	0
chr15-82044195-82048070	7.77925e-05	0.456854	0.306	0.134	1	MEX3B	0
chr9-70600591-70603049	9.7174e-13	0.455909	0.204	0.034	1.34557e-07	TRPM3	0
chr9-129138688-129141913	0.000156288	0.455012	0.312	0.133	1	PTPA	0
chr9-14320093-14323522	1.70545e-06	0.453913	0.253	0.087	0.236153	NFIB	0
chr3-15645579-15648293	6.62646e-08	0.45384	0.242	0.065	0.00917566	BTD	0
chr6-106083698-106089153	3.21787e-05	0.452282	0.258	0.097	1	PRDM1	0
chr5-139695795-139698214	1.90269e-13	0.451958	0.22	0.037	2.63466e-08	CTB-35F21.1	0
chr17-38747344-38753385	0.00119282	0.451753	0.323	0.161	1	PSMB3	0
chr6-32194907-32198436	0.000853016	0.451081	0.344	0.171	1	NOTCH4	0
chr5-14142399-14146345	6.07084e-06	0.45059	0.29	0.104	0.840629	TRIO	0
chr11-46119064-46122683	0.000101955	0.450338	0.285	0.116	1	PHF21A	0
chr3-141366115-141370823	0.00257419	0.450113	0.253	0.107	1	PXYLP1	0
chr2-126655308-126659751	7.25761e-05	0.449169	0.247	0.095	1	GYPC	0
chr22-44023625-44027670	7.75383e-05	0.448057	0.237	0.081	1	PARVB	0
chr10-73997288-73999927	1.6189e-05	0.448047	0.306	0.13	1	VCL	0
chr10-117373225-117376768	1.99726e-06	0.446998	0.269	0.094	0.27656	PDZD8	0
chr12-54416741-54421911	7.54849e-09	0.446941	0.242	0.06	0.00104524	ITGA5	0
chr20-63685960-63688019	1.05518e-10	0.446848	0.215	0.042	1.4611e-05	RTEL1	0
chr11-47406842-47410512	0.00140867	0.445742	0.296	0.134	1	SLC39A13	0
chr8-133281263-133298701	0.0114092	0.445693	0.473	0.295	1	NDRG1	0
chr3-186107525-186110498	0.000138931	0.445548	0.306	0.128	1	ETV5	0
chr3-129603022-129609003	0.000207102	0.445367	0.231	0.085	1	PLXND1	0
chr11-65487101-65489738	1.62264e-06	0.444178	0.226	0.068	0.224687	CMB9-22P13.2	0
chr1-52139675-52143215	4.32591e-06	0.443789	0.242	0.08	0.599009	ZFYVE9	0
chr17-1107491-1112378	4.16508e-05	0.443721	0.285	0.111	1	ABR	0
chr4-41212258-41217273	2.156e-06	0.443332	0.263	0.082	0.298541	APBB2	0
chr8-127851047-127855136	1.24646e-05	0.443185	0.317	0.123	1	PVT1	0
chr9-133237147-133239525	1.50996e-13	0.442256	0.204	0.031	2.09084e-08	ABO	10875
chr10-30782397-30785678	5.14853e-08	0.441834	0.21	0.055	0.00712916	ZNF438	34528
chr22-33919207-33922933	5.07701e-07	0.441792	0.231	0.07	0.0703013	LARGE1	0
chr15-74956039-74959355	2.17426e-05	0.441594	0.231	0.074	1	RPP25	0
chr15-64840822-64847490	8.22517e-05	0.440928	0.323	0.127	1	PLEKHO2	0
chr11-57321143-57326267	0.00192748	0.44092	0.366	0.183	1	TNKS1BP1	0
chr8-22547466-22555246	1.6382e-06	0.440813	0.28	0.089	0.226842	SORBS3	0
chr1-26723166-26724220	5.15773e-13	0.440784	0.204	0.034	7.14191e-08	ARID1A	0
chr1-200737912-200740636	1.28857e-07	0.440633	0.215	0.058	0.0178428	CAMSAP2	0
chr12-52050020-52061611	0.00626915	0.440598	0.366	0.205	1	NR4A1	0
chr18-3012245-3017227	1.17956e-05	0.440248	0.274	0.105	1	LPIN2	0
chr2-217901779-217906245	1.3937e-08	0.440174	0.204	0.043	0.00192986	TNS1	0
chr7-42235731-42239516	0.000178337	0.440066	0.226	0.091	1	GLI3	0
chr2-160491651-160494693	6.11414e-09	0.43966	0.242	0.059	0.000846624	RBMS1	0
chr2-231640448-231643641	9.92051e-09	0.43961	0.258	0.069	0.00137369	C2orf57	46164
chr11-2883952-2886727	4.40638e-05	0.439542	0.204	0.066	1	CDKN1C	0
chr19-47272312-47276475	0.00151356	0.439321	0.339	0.169	1	INAFM1	0
chr3-43768577-43771814	1.38563e-07	0.439195	0.231	0.069	0.0191869	RP4-672N11.1	7146
chr5-179816721-179823336	0.0114433	0.438865	0.333	0.181	1	SQSTM1	0
chr15-73984987-73989914	9.79328e-07	0.438793	0.22	0.062	0.135608	STOML1	0
chr17-81422363-81424134	8.16196e-08	0.437508	0.22	0.055	0.0113019	BAHCC1	0
chr12-55846905-55849802	1.16343e-08	0.437333	0.247	0.054	0.001611	MMP19	3938
chr14-74616228-74621381	0.00103268	0.437172	0.285	0.122	1	CTD-2207P18.2	0
chr19-49637661-49643924	0.0329132	0.437075	0.409	0.271	1	RRAS	0
chr7-131102432-131111678	0.000686194	0.435883	0.425	0.218	1	MKLN1	0
chr7-157335192-157341071	0.000134641	0.435664	0.301	0.129	1	DNAJB6	0
chr3-4975858-4987605	0.358054	0.435426	0.575	0.423	1	BHLHE40	0
chr8-121638924-121642709	6.38254e-06	0.435387	0.226	0.067	0.88379	HAS2	0
chr1-56578142-56579964	7.72511e-14	0.435347	0.22	0.035	1.0697e-08	PLPP3	0
chr19-44744532-44751573	0.00102016	0.435287	0.339	0.165	1	BCL3	0
chr7-116524428-116528664	1.84846e-06	0.435026	0.242	0.084	0.255956	CAV1	0
chr11-96154785-96157544	0.000355558	0.434952	0.226	0.08	1	MAML2	0
chr5-172409875-172415325	8.79501e-06	0.434905	0.22	0.071	1	SH3PXD2B	0
chr1-9233051-9235575	5.53252e-07	0.434579	0.253	0.078	0.0766088	H6PD	0
chr5-112417691-112420707	3.62655e-05	0.434047	0.21	0.07	1	EPB41L4A	0
chr19-2474448-2480130	0.0334148	0.434044	0.339	0.184	1	GADD45B	0
chr6-32966645-32975245	0.0859016	0.433936	0.495	0.312	1	BRD2	0
chr11-33256059-33259265	4.06896e-07	0.433725	0.306	0.108	0.0563429	HIPK3	0
chr19-39401015-39415204	0.242376	0.433697	0.651	0.479	1	ZFP36	0
chr2-223943144-223946135	2.244e-08	0.433464	0.242	0.061	0.00310727	WDFY1	0
chr3-39145777-39154831	0.0286194	0.433365	0.522	0.331	1	CSRNP1	0
chr6-75204134-75209378	3.00448e-06	0.432876	0.247	0.084	0.41603	COL12A1	0
chr6-35725356-35733433	0.0106689	0.432719	0.339	0.2	1	FKBP5	0
chr12-122946217-122948001	4.81093e-07	0.432696	0.258	0.08	0.066617	ABCB9	0
chr1-2226784-2233158	0.0012906	0.432545	0.333	0.174	1	SKI	0
chr2-85583593-85586283	8.50224e-10	0.432297	0.258	0.067	0.000117731	VAMP5	0
chr1-182389588-182392599	2.61482e-08	0.432148	0.253	0.075	0.00362074	GLUL	0
chr6-4350443-4352795	1.23484e-11	0.431489	0.204	0.03	1.70988e-06	RP3-527G5.1	3405
chr18-48936847-48953449	0.0381156	0.431395	0.468	0.288	1	SMAD7	0
chr2-96527103-96540585	0.0243335	0.430977	0.441	0.27	1	ARID5A	0
chr17-8117434-8127312	0.026477	0.430791	0.323	0.179	1	HES7	0
chr8-38526910-38529195	2.91856e-06	0.430193	0.22	0.068	0.404133	C8orf86	0
chr12-131892848-131897115	0.00021433	0.430168	0.28	0.122	1	ULK1	0
chr5-150777686-150782465	3.37045e-05	0.430018	0.263	0.101	1	SMIM3	0
chr1-156659704-156663129	4.98718e-06	0.430014	0.226	0.073	0.690575	BCAN	171
chr16-4368755-4376523	6.84662e-07	0.429198	0.301	0.102	0.0948052	VASN	0
chr15-67064885-67069578	0.000644376	0.429065	0.226	0.087	1	SMAD3	0
chr12-106953525-106957412	0.000162825	0.428726	0.242	0.108	1	TMEM263	0
chr6-134167583-134178928	0.0032811	0.428513	0.371	0.192	1	SGK1	0
chr10-110207227-110212606	8.00965e-05	0.428509	0.312	0.14	1	MXI1	0
chr12-58916761-58921536	2.44539e-08	0.428391	0.22	0.052	0.00338614	LRIG3	0
chr11-94766528-94770332	5.48026e-08	0.42802	0.22	0.056	0.00758852	AMOTL1	0
chr1-153984647-153987420	6.46872e-06	0.427899	0.226	0.078	0.895723	RAB13	0
chr3-136817566-136820808	8.29447e-05	0.427693	0.242	0.095	1	SLC35G2	0
chr12-49364869-49368546	1.18492e-05	0.427547	0.285	0.108	1	SPATS2	0
chr19-48489647-48494436	0.000816518	0.427139	0.296	0.13	1	LMTK3	0
chr16-17468908-17472175	7.18457e-09	0.426655	0.204	0.05	0.000994848	XYLT1	0
chr4-141635621-141638938	1.91571e-06	0.4265	0.28	0.102	0.265268	IL15	0
chr17-78341416-78344395	2.80883e-05	0.426438	0.269	0.095	1	AC061992.2	0
chr2-109611551-109616346	0.0095361	0.426386	0.242	0.112	1	SEPT10	0
chr14-61560353-61567214	0.00196838	0.426175	0.306	0.151	1	RP11-47I22.4	0
chr1-154324299-154330149	0.00459409	0.425915	0.285	0.143	1	ATP8B2	0
chr20-47784453-47786946	4.22473e-10	0.424848	0.21	0.038	5.84998e-05	SULF2	0
chr17-75031998-75037191	0.000201823	0.424775	0.312	0.136	1	KCTD2	0
chr17-7349261-7353102	0.000104966	0.424752	0.237	0.098	1	ACAP1	0
chr10-73905498-73912292	0.00245191	0.424562	0.306	0.131	1	PLAU	0
chr3-38135600-38139960	0.0211457	0.424457	0.317	0.181	1	ACAA1	0
chr2-226796709-226801834	9.96435e-06	0.423415	0.215	0.068	1	IRS1	0
chr1-117121068-117122684	5.93719e-06	0.422618	0.269	0.096	0.822123	TRIM45	0
chr11-102109684-102112746	7.26127e-08	0.422045	0.253	0.071	0.0100547	YAP1	0
chr6-82362873-82365846	9.5498e-10	0.421979	0.21	0.046	0.000132236	TPBG	0
chr18-76490517-76497289	0.000399069	0.421356	0.306	0.132	1	ZNF516	0
chr16-67243561-67249346	0.0126617	0.421145	0.366	0.205	1	SLC9A5	0
chr6-110873284-110877829	0.0018378	0.421013	0.301	0.15	1	AMD1	0
chr5-142323810-142326632	1.36975e-06	0.420749	0.226	0.059	0.189669	SPRY4	0
chr1-20493543-20497083	7.31383e-06	0.420482	0.22	0.076	1	MUL1	2364
chr1-23483172-23485075	4.06715e-05	0.42033	0.247	0.089	1	ASAP3	0
chr21-34524941-34527531	2.66116e-08	0.420074	0.21	0.052	0.00368491	RCAN1	0
chr10-87860095-87866095	0.00855103	0.419779	0.328	0.176	1	KLLN	0
chr19-13849992-13852004	0.000201889	0.419663	0.231	0.081	1	NANOS3	10058
chr22-45211485-45213875	1.3957e-12	0.419474	0.215	0.037	1.93263e-07	KIAA0930	0
chr5-177493909-177498584	0.094429	0.418901	0.301	0.162	1	PDLIM7	0
chr15-85617372-85621537	2.37267e-07	0.418408	0.269	0.083	0.0328544	AKAP13	0
chr1-109926842-109930298	2.05766e-11	0.418353	0.21	0.041	2.84924e-06	CSF1	0
chr12-57519305-57524626	0.0420836	0.418231	0.36	0.211	1	MBD6	0
chr11-9263245-9266027	7.70709e-06	0.417851	0.215	0.065	1	DENND5A	0
chr15-38250944-38255000	0.00042039	0.417676	0.263	0.105	1	SPRED1	0
chr21-43331923-43334284	7.05014e-10	0.417281	0.204	0.04	9.76233e-05	LINC00322	0
chr2-74553094-74556522	3.35667e-05	0.417249	0.231	0.077	1	DOK1	0
chr3-195258012-195261086	1.2852e-05	0.41666	0.237	0.087	1	XXYLT1	0
chr19-49441222-49444166	0.000140191	0.416428	0.301	0.123	1	SLC17A7	0
chr17-21039882-21044218	0.00543668	0.416195	0.312	0.159	1	USP22	0
chr11-65414875-65433409	0.912218	0.416112	0.634	0.499	1	NEAT1	0
chr16-54283884-54287602	3.86997e-07	0.416062	0.22	0.064	0.0535875	IRX3	0
chr10-112949468-112954142	0.000140669	0.415957	0.231	0.079	1	TCF7L2	0
chr13-114128672-114133074	5.86023e-05	0.415832	0.269	0.103	1	RASA3	0
chr20-64037538-64042821	0.000108095	0.41549	0.215	0.078	1	LINC00176	0
chr10-31602451-31604103	2.44055e-09	0.415108	0.204	0.049	0.000337943	RP11-472N13.2	496
chr17-40340816-40346186	4.76176e-05	0.414918	0.258	0.095	1	RARA	0
chr7-66204585-66207129	2.13759e-10	0.414892	0.204	0.037	2.95992e-05	TPST1	0
chr1-206633413-206636397	0.00258334	0.414887	0.247	0.105	1	DYRK3	0
chr1-2212346-2214847	1.19212e-07	0.414817	0.215	0.057	0.0165074	FAAP20	0
chr9-129495246-129497840	1.25862e-05	0.414736	0.237	0.079	1	LINC00963	0
chr1-156745915-156752597	0.00201015	0.414527	0.398	0.22	1	HDGF	0
chr22-36026666-36029709	2.84614e-06	0.414236	0.253	0.083	0.394105	RBFOX2	0
chr6-1609072-1612572	5.06124e-09	0.413799	0.204	0.044	0.00070083	FOXC1	0
chr9-72362024-72366453	0.109997	0.413793	0.317	0.199	1	ZFAND5	0
chr15-77993546-77995680	2.19569e-09	0.413784	0.22	0.055	0.000304037	TBC1D2B	0
chr8-143947872-143954294	0.00795718	0.413744	0.409	0.224	1	PLEC	0
chr18-32468427-32471768	5.79491e-08	0.413724	0.28	0.092	0.00802421	GAREM1	0
chr10-97713154-97715786	3.12321e-07	0.412742	0.215	0.062	0.0432471	MARVELD1	0
chr4-74097488-74100148	1.22836e-06	0.412742	0.21	0.059	0.170091	CXCL2	0
chr2-14632337-14635892	6.19973e-11	0.412731	0.204	0.039	8.58476e-06	FAM84A	0
chr17-14297147-14304265	0.152857	0.412441	0.366	0.228	1	HS3ST3B1	0
chr1-151280853-151284405	0.0598512	0.412257	0.382	0.235	1	ZNF687	0
chr9-112059114-112061868	3.5324e-06	0.412238	0.22	0.068	0.489132	SUSD1	0
chr2-238285316-238291044	0.00397436	0.412185	0.355	0.182	1	PER2	0
chr2-241314161-241318363	0.031589	0.411728	0.301	0.161	1	SEPT2	0
chr2-12714496-12720606	0.00517057	0.411697	0.274	0.148	1	TRIB2	0
chr22-30634185-30636904	7.85342e-05	0.411403	0.301	0.126	1	SLC35E4	0
chr10-110917881-110921271	0.00288695	0.411398	0.36	0.192	1	BBIP1	0
chr5-109408648-109412167	0.0283439	0.411036	0.36	0.206	1	PJA2	0
chr1-151195094-151200707	0.000149771	0.410491	0.301	0.124	1	PIP5K1A	0
chr1-39025700-39027356	2.44583e-05	0.41048	0.215	0.074	1	NDUFS5	0
chr3-48465257-48467454	0.000684357	0.410127	0.247	0.099	1	TREX1	0
chr17-73309568-73313169	0.00104472	0.410063	0.29	0.129	1	CDC42EP4	0
chr8-106269383-106271783	4.22161e-08	0.409912	0.231	0.061	0.00584566	RP11-395G23.3	0
chr12-52022688-52026340	0.00115315	0.409787	0.285	0.12	1	NR4A1	0
chr11-67352626-67355211	0.00415225	0.408923	0.263	0.127	1	AP003419.11	0
chr13-110868799-110872490	0.00100391	0.408863	0.226	0.088	1	LINC00346	0
chr22-37185653-37190113	1.76099e-06	0.408792	0.242	0.084	0.243845	C1QTNF6	0
chr2-45008967-45010574	5.99895e-08	0.40837	0.21	0.061	0.00830675	SIX2	0
chr6-32153195-32155179	1.05813e-07	0.408078	0.22	0.06	0.014652	PPT2-EGFL8	0
chr10-21524716-21527795	2.0095e-05	0.407481	0.231	0.077	1	MLLT10	0
chr11-9572262-9575995	0.000161661	0.407428	0.312	0.137	1	WEE1	0
chr22-38313289-38318891	0.00150922	0.407099	0.247	0.108	1	CSNK1E	0
chr12-89348933-89355575	0.0124867	0.405804	0.328	0.176	1	DUSP6	0
chr5-52798532-52802079	0.000240022	0.405687	0.269	0.108	1	PELO	0
chr3-179449615-179452507	6.63957e-07	0.405264	0.226	0.063	0.0919381	GNB4	0
chr10-79148246-79152897	0.000400718	0.404843	0.22	0.079	1	ZMIZ1	0
chr5-141511939-141515560	0.000198641	0.404568	0.215	0.081	1	PCDHGC3	0
chr19-41321558-41329381	0.0390878	0.404137	0.328	0.181	1	CCDC97	0
chr3-50320453-50324996	0.00101142	0.403317	0.237	0.096	1	HYAL2	0
chr2-11342435-11345714	0.000391375	0.402903	0.242	0.1	1	ROCK2	0
chr2-8676467-8683837	0.0115919	0.402624	0.409	0.224	1	ID2	0
chr11-9756035-9760677	0.0022771	0.401773	0.285	0.136	1	RP11-540A21.2	0
chr22-41380296-41383215	0.00346789	0.401644	0.306	0.149	1	TEF	0
chr17-17834393-17838774	2.12702e-05	0.40135	0.231	0.092	1	SREBF1	0
chr1-234977952-234981448	0.00681142	0.401178	0.263	0.121	1	RP11-443B7.3	0
chr16-11975659-11978479	1.41877e-06	0.400267	0.22	0.07	0.196457	SNX29	0
chr12-59595467-59597994	0.000159443	0.399856	0.237	0.091	1	SLC16A7	0
chr1-235917037-235921298	0.000960675	0.399371	0.226	0.09	1	RP5-940F7.2	21254
chr11-70397528-70400755	2.75511e-06	0.399097	0.226	0.073	0.3815	CTTN	0
chr3-52052226-52058549	0.00795442	0.399031	0.382	0.212	1	DUSP7	0
chr1-220876533-220881792	1.43669e-06	0.398993	0.242	0.07	0.198938	HLX	0
chr6-31729103-31730770	1.02217e-07	0.39895	0.247	0.066	0.014154	DDAH2	0
chr22-23144702-23146341	3.58496e-06	0.398746	0.21	0.07	0.496409	RAB36	0
chr15-73681603-73687830	0.000180806	0.398694	0.231	0.078	1	CD276	0
chr19-11088892-11093571	0.00376247	0.398645	0.328	0.171	1	LDLR	0
chr19-29662267-29669434	0.00172631	0.398475	0.333	0.159	1	PLEKHF1	0
chr15-77418514-77421722	0.00355304	0.397954	0.269	0.12	1	PEAK1	0
chr19-48871841-48885607	0.127383	0.397794	0.473	0.302	1	PPP1R15A	0
chr2-85537489-85540771	0.0422793	0.39769	0.247	0.127	1	MAT2A	0
chr17-37358200-37360130	4.10845e-06	0.396449	0.242	0.077	0.568897	ACACA	0
chr5-176446991-176449321	7.63177e-05	0.396396	0.285	0.123	1	FAF2	0
chr8-102236552-102240626	0.014806	0.39633	0.366	0.215	1	RRM2B	0
chr19-42241810-42245387	0.0402862	0.396304	0.371	0.221	1	GSK3A	0
chr4-51842047-51845293	0.00255517	0.396175	0.333	0.171	1	DCUN1D4	0
chr11-59171343-59175711	0.000669115	0.395782	0.328	0.148	1	DTX4	0
chr10-30432741-30438767	0.00383607	0.395492	0.328	0.172	1	MAP3K8	0
chr16-4942974-4946377	7.39781e-06	0.395457	0.215	0.069	1	PPL	0
chr8-29345474-29354267	0.070317	0.395387	0.29	0.171	1	DUSP4	0
chr2-205681758-205687828	0.00835506	0.395378	0.226	0.092	1	NRP2	0
chr15-62118365-62120235	6.20339e-05	0.394888	0.21	0.068	1	C2CD4B	43299
chr12-13194212-13199422	0.00156344	0.39485	0.263	0.122	1	EMP1	0
chr1-161131274-161134029	0.000833135	0.394738	0.285	0.129	1	DEDD	0
chr5-132293054-132296019	0.00158586	0.394738	0.285	0.124	1	P4HA2	0
chr2-55045857-55052377	0.0478369	0.394711	0.392	0.237	1	RTN4	0
chr19-45402159-45407570	0.0728685	0.394471	0.317	0.186	1	CD3EAP	0
chr11-65496431-65511284	0.491227	0.394392	0.489	0.343	1	AP000769.1	0
chr5-139657842-139662116	0.000455963	0.393728	0.226	0.08	1	CXXC5	0
chr1-3899350-3901854	0.00142116	0.393709	0.376	0.203	1	C1orf174	0
chr2-207162966-207167876	0.00103668	0.393352	0.387	0.194	1	KLF7	0
chr16-57298782-57301482	0.00867632	0.392664	0.285	0.132	1	PLLP	14094
chr10-32980214-32983766	0.000260838	0.3924	0.247	0.101	1	ITGB1	0
chr6-117481470-117484096	9.30292e-06	0.39239	0.21	0.066	1	DCBLD1	0
chr3-15794157-15798422	0.00014678	0.392294	0.237	0.088	1	ANKRD28	0
chr14-73751133-73763262	0.179508	0.391986	0.489	0.306	1	ELMSAN1	0
chr11-120207916-120213283	0.000150135	0.391471	0.237	0.078	1	OAF	0
chr7-137998748-138002701	0.000377304	0.391345	0.323	0.144	1	CREB3L2	0
chr20-323422-327786	0.0144063	0.390941	0.301	0.155	1	SOX12	0
chr1-15616387-15619354	0.00155978	0.390716	0.29	0.136	1	DDI2	0
chr19-38386946-38390589	0.000462666	0.390677	0.242	0.096	1	SPRED3	0
chr1-19434990-19441716	9.41136e-07	0.39032	0.247	0.076	0.130319	CAPZB	0
chr6-145734540-145736269	2.3369e-07	0.390264	0.22	0.065	0.0323591	EPM2A	0
chr2-71276052-71278224	0.000235605	0.39024	0.204	0.075	1	ZNF638	0
chr2-202374827-202378348	0.000223926	0.3901	0.263	0.105	1	BMPR2	0
chr19-47256046-47258230	0.00231493	0.389952	0.312	0.148	1	CCDC9	0
chr11-78416190-78421466	0.00183483	0.389823	0.285	0.128	1	GAB2	0
chr19-47742519-47744330	6.52763e-07	0.389593	0.204	0.051	0.090388	EHD2	0
chr9-133990398-133995192	0.000974714	0.38953	0.301	0.128	1	VAV2	0
chr7-149770847-149775042	3.89953e-06	0.388558	0.215	0.068	0.539968	ZNF467	0
chr7-13988908-13992011	0.000164905	0.387791	0.231	0.094	1	ETV1	0
chr22-30422540-30427255	0.0604291	0.386687	0.312	0.174	1	MTFP1	0
chr14-68788587-68797338	0.206164	0.386575	0.473	0.318	1	ZFP36L1	0
chr9-136846683-136850790	0.00686376	0.386065	0.312	0.158	1	C9orf172	0
chr20-36460688-36468337	0.123444	0.385994	0.306	0.179	1	DLGAP4	0
chr12-6334987-6342697	0.121931	0.385961	0.349	0.214	1	TNFRSF1A	0
chr1-91884721-91886972	6.63145e-07	0.385619	0.21	0.061	0.0918257	TGFBR3	0
chr22-19477568-19480436	0.00250358	0.385435	0.301	0.147	1	CDC45	0
chr17-80413500-80416028	2.59685e-05	0.385272	0.242	0.082	1	ENDOV	0
chr19-11344394-11347213	0.00661301	0.384986	0.247	0.115	1	TMEM205	0
chr11-128464424-128472876	2.90495e-05	0.384667	0.258	0.1	1	ETS1	0
chr11-65887514-65894631	0.0905566	0.384652	0.366	0.235	1	FOSL1	0
chr1-11802510-11807357	0.0252654	0.384349	0.333	0.175	1	MTHFR	0
chr6-113854614-113860119	0.000377031	0.384024	0.29	0.121	1	MARCKS	0
chr15-73629050-73634703	0.0355183	0.383996	0.285	0.149	1	NPTN	0
chr14-76917043-76920547	0.000470988	0.383439	0.22	0.08	1	RP11-488C13.4	1292
chr4-2790670-2802246	0.016894	0.383171	0.355	0.184	1	SH3BP2	0
chr8-73877125-73880710	0.00692508	0.38307	0.285	0.144	1	UBE2W	0
chr11-68120177-68122400	2.31083e-05	0.382916	0.22	0.073	1	CHKA	0
chr19-43667715-43670932	0.0477672	0.382354	0.317	0.177	1	PLAUR	0
chr10-79066367-79072596	0.00819487	0.382061	0.274	0.13	1	ZMIZ1	0
chr3-66035561-66039990	4.26934e-06	0.382007	0.204	0.059	0.591176	MAGI1	0
chr17-2335494-2338671	0.00188095	0.381751	0.215	0.09	1	TSR1	0
chr18-22168275-22172119	2.48939e-05	0.381574	0.21	0.065	1	GATA6	0
chr11-65491074-65494984	0.0094275	0.381542	0.263	0.123	1	MALAT1	2777
chr17-16285719-16288043	5.82879e-07	0.381432	0.231	0.067	0.0807113	PIGL	0
chr14-35365018-35368989	0.000971865	0.381318	0.231	0.096	1	RP11-561B11.3	1389
chr19-45091353-45093901	3.0788e-05	0.381021	0.247	0.089	1	PPP1R37	0
chr8-109332078-109335177	0.0560367	0.380899	0.344	0.204	1	ENY2	0
chr7-139775543-139778884	0.000573368	0.380761	0.21	0.075	1	HIPK2	0
chr9-93092718-93099500	0.0929952	0.380723	0.398	0.255	1	CARD19	0
chr18-54357230-54358855	0.000185014	0.380601	0.21	0.083	1	C18orf54	0
chr10-99618775-99622131	0.0639953	0.380473	0.339	0.213	1	SLC25A28	0
chr16-2903891-2907691	0.00399612	0.380102	0.306	0.166	1	FLYWCH1	4245
chr4-169268806-169272793	2.4724e-05	0.380008	0.22	0.074	1	SH3RF1	0
chr19-47225690-47233406	0.226964	0.379648	0.339	0.213	1	BBC3	0
chr17-67376431-67379677	0.000227214	0.379599	0.263	0.11	1	PITPNC1	0
chr5-65480212-65484176	5.24464e-05	0.379506	0.215	0.075	1	ADAMTS6	0
chr1-65065941-65069554	0.0173174	0.379119	0.237	0.113	1	RP4-535B20.1	0
chr17-35432012-35434054	3.52345e-08	0.379078	0.21	0.053	0.00487892	SLFN12	0
chr19-18519239-18523091	0.01731	0.378864	0.333	0.196	1	ELL	0
chr8-38734030-38735369	5.751e-08	0.378025	0.204	0.056	0.00796342	TACC1	0
chr6-125746736-125750268	9.17254e-07	0.377882	0.226	0.07	0.127012	HEY2	0
chr9-35728120-35734234	0.042848	0.377566	0.366	0.22	1	CREB3	0
chr12-38903457-38907599	0.0236453	0.377376	0.242	0.116	1	CPNE8	0
chr1-156703437-156713652	0.0468549	0.377261	0.22	0.117	1	CRABP2	0
chr7-1456830-1464247	0.127107	0.377185	0.349	0.209	1	MICALL2	0
chr1-65419466-65424729	0.150987	0.376891	0.339	0.208	1	LEPROT	0
chr8-140999784-141002639	4.75447e-07	0.3766	0.215	0.058	0.0658352	PTK2	0
chr5-95820840-95825113	0.00159509	0.37645	0.242	0.113	1	RHOBTB3	0
chr1-146035223-146040189	0.00198065	0.376384	0.285	0.139	1	HFE2	0
chr6-30489007-30497287	0.0403	0.376241	0.36	0.224	1	HLA-E	0
chr13-44434853-44438424	0.000934921	0.375847	0.247	0.109	1	TSC22D1	0
chr1-32199823-32202251	0.000670845	0.375761	0.22	0.079	1	CCDC28B	0
chr3-9394745-9400254	0.355351	0.37563	0.403	0.291	1	SETD5	0
chr19-17468847-17470902	0.0253831	0.375549	0.253	0.125	1	SLC27A1	0
chr14-31205590-31208861	0.00267444	0.375398	0.285	0.143	1	HECTD1	0
chr14-75577405-75579900	0.000283591	0.375381	0.204	0.079	1	FLVCR2	0
chr19-58572219-58576485	0.0572533	0.37533	0.392	0.227	1	MZF1	0
chr12-124388162-124393568	0.000182144	0.374935	0.237	0.085	1	NCOR2	0
chr1-29121134-29125791	6.24973e-06	0.374519	0.231	0.081	0.8654	TMEM200B	0
chr6-2985773-2991324	0.011859	0.374414	0.371	0.203	1	NQO2	0
chr2-45649463-45653086	0.0132598	0.37437	0.247	0.119	1	PRKCE	0
chr11-57310458-57312755	0.000315063	0.374363	0.204	0.077	1	TNKS1BP1	0
chr2-27049728-27052592	0.0013356	0.37424	0.312	0.156	1	AGBL5	0
chr9-33813588-33819486	0.0556544	0.374109	0.333	0.198	1	UBE2R2	0
chr15-100600771-100603651	0.0223936	0.373519	0.29	0.159	1	LINS1	0
chr19-46713557-46718955	0.0068542	0.373421	0.263	0.131	1	PRKD2	0
chr17-17041200-17044270	0.000501016	0.373312	0.242	0.099	1	MPRIP	0
chr11-76781155-76786014	5.56297e-05	0.37322	0.22	0.072	1	TSKU	0
chr13-46551425-46556755	0.0641204	0.373012	0.263	0.147	1	LRCH1	0
chr15-78506841-78508456	0.000122822	0.372609	0.204	0.077	1	HYKK	0
chr19-42250948-42256573	0.0022083	0.372559	0.247	0.108	1	AC006486.9	0
chr2-230408172-230412814	0.000331311	0.372358	0.242	0.087	1	SP100	3127
chr17-7011908-7016118	0.0283914	0.371957	0.339	0.19	1	RNASEK	0
chr11-64867809-64871535	0.000262494	0.371805	0.242	0.092	1	EHD1	0
chr12-108689276-108692858	0.006152	0.371794	0.237	0.112	1	CORO1C	0
chr20-35615345-35620194	0.00514345	0.371664	0.414	0.228	1	SPAG4	0
chr2-28389344-28397142	0.306693	0.371537	0.457	0.31	1	FOSL2	0
chr11-46236280-46240103	0.000720165	0.371151	0.21	0.077	1	CTD-2589M5.5	0
chr19-21835392-21836597	1.51474e-07	0.370981	0.21	0.056	0.0209747	ZNF43	0
chr2-46845614-46851336	0.000321985	0.370831	0.231	0.098	1	LINC01119	0
chr1-184386238-184389872	0.00709524	0.370544	0.247	0.106	1	C1orf21	0
chr16-20899062-20902337	0.0263219	0.370485	0.29	0.152	1	LYRM1	0
chr14-54563957-54569871	0.00931656	0.370311	0.274	0.134	1	SAMD4A	0
chr16-29804103-29812666	0.0943955	0.369915	0.382	0.232	1	MAZ	0
chr4-56433814-56437997	0.0740262	0.369705	0.355	0.22	1	PAICS	0
chr15-78075405-78078301	5.7739e-06	0.369143	0.237	0.073	0.799512	TBC1D2B	0
chr17-39151450-39155278	0.0022435	0.368309	0.226	0.104	1	PLXDC1	0
chr7-139339853-139342350	0.0578778	0.368212	0.285	0.167	1	C7orf55-LUC7L2	0
chr17-38867370-38872975	0.00881742	0.368113	0.317	0.17	1	LASP1	0
chr4-1578907-1581598	0.0265402	0.368071	0.226	0.102	1	RP11-1398P2.1	0
chr17-31580262-31582735	8.07272e-07	0.367339	0.21	0.055	0.111783	RP1-41C23.1	426
chr15-25437697-25439866	1.88426e-05	0.36718	0.22	0.081	1	UBE3A	0
chr3-12556329-12559820	0.00180918	0.36692	0.215	0.089	1	MKRN2	0
chr9-35113766-35117457	0.0394978	0.366803	0.387	0.239	1	FAM214B	0
chr5-139646903-139654440	0.101076	0.366792	0.269	0.142	1	CXXC5	0
chr17-28725303-28729513	0.179504	0.366656	0.344	0.215	1	TLCD1	0
chr2-156331551-156336132	0.0939871	0.36651	0.36	0.223	1	NR4A2	0
chr20-44642124-44645278	3.18767e-06	0.366453	0.21	0.07	0.441397	ADA	0
chr1-26619401-26622122	0.115683	0.366151	0.231	0.121	1	RPS6KA1	44370
chr6-157018974-157022790	0.0358177	0.366142	0.263	0.134	1	ARID1B	0
chr12-116275723-116279213	0.000404174	0.366101	0.231	0.092	1	MED13L	0
chr16-3157061-3160160	0.000119187	0.365613	0.237	0.088	1	RP11-473M20.16	0
chr17-7482965-7486612	0.0103372	0.365554	0.317	0.163	1	POLR2A	0
chr2-157874569-157877801	9.39557e-05	0.36554	0.28	0.118	1	UPP2	0
chr3-98900410-98902419	0.0012083	0.365532	0.215	0.092	1	DCBLD2	0
chr22-50522683-50534831	0.0860913	0.36477	0.452	0.288	1	SCO2	0
chr19-40613062-40616089	0.0121984	0.364755	0.301	0.153	1	LTBP4	0
chr2-65430304-65433406	0.00477555	0.364594	0.253	0.108	1	SPRED2	0
chr17-7237106-7243618	0.0632889	0.364545	0.323	0.18	1	PHF23	0
chr6-125789539-125794406	0.00185513	0.364458	0.263	0.114	1	NCOA7	0
chr10-94402089-94404249	2.66859e-06	0.364388	0.21	0.053	0.36952	TBC1D12	0
chr12-122077973-122082952	0.0662211	0.364184	0.258	0.129	1	MLXIP	0
chr2-179262936-179265680	0.0011037	0.364021	0.204	0.076	1	SESTD1	0
chr3-168094319-168096835	0.00590941	0.364007	0.28	0.14	1	GOLIM4	0
chr18-48408412-48411073	1.36774e-05	0.363496	0.21	0.071	1	ZBTB7C	0
chr6-108557493-108563089	0.0195393	0.36335	0.355	0.206	1	FOXO3	0
chr11-61791813-61793555	0.000176598	0.36303	0.237	0.095	1	TMEM258	0
chr11-118607335-118611463	0.128275	0.362374	0.226	0.112	1	PHLDB1	0
chr9-127915244-127919965	0.00930052	0.362279	0.274	0.137	1	ST6GALNAC4	0
chr7-128737946-128740631	0.000646206	0.362272	0.231	0.103	1	CALU	0
chr12-103928306-103931938	0.0265382	0.362075	0.371	0.224	1	HSP90B1	0
chr17-39925993-39930073	0.00934111	0.36207	0.226	0.105	1	ORMDL3	0
chr22-28882567-28884820	0.000365468	0.361723	0.204	0.07	1	ZNRF3	0
chr2-88626193-88628680	0.0698942	0.361714	0.344	0.211	1	EIF2AK3	0
chr4-17576256-17581318	0.111713	0.361709	0.323	0.19	1	LAP3	0
chr4-76209738-76215229	0.0140252	0.361616	0.247	0.117	1	FAM47E	0
chr1-23366323-23371270	0.153967	0.361505	0.328	0.206	1	ZNF436	0
chr6-34242587-34245005	3.87826e-06	0.361376	0.204	0.059	0.537023	HMGA1	0
chr19-49148516-49152506	0.00149938	0.361254	0.247	0.102	1	PPFIA3	0
chr6-146543088-146547114	0.00039859	0.361081	0.204	0.071	1	RAB32	0
chr2-48105990-48108103	0.00022173	0.360868	0.226	0.086	1	AC079807.4	0
chr21-41167356-41171734	7.41425e-05	0.360533	0.204	0.061	1	BACE2	0
chr15-89997985-90006121	0.110803	0.360435	0.269	0.137	1	ZNF710	0
chr4-170025988-170027859	8.62944e-06	0.360209	0.21	0.064	1	MFAP3L	0
chr2-55615072-55619332	0.0573203	0.36018	0.344	0.209	1	PPP4R3B	0
chr10-79443836-79447004	0.0205743	0.360168	0.247	0.136	1	ZCCHC24	0
chr17-37487865-37491661	0.00119253	0.360067	0.237	0.103	1	DUSP14	0
chr6-159788342-159791654	0.00932878	0.35994	0.323	0.176	1	TCP1	0
chr3-11641358-11644379	0.000569351	0.359332	0.215	0.083	1	VGLL4	0
chr2-47069399-47074613	4.59834e-05	0.359324	0.204	0.068	1	TTC7A	0
chr15-75646273-75649470	0.00011749	0.359254	0.22	0.07	1	SNX33	0
chr4-7041887-7045074	0.00108183	0.359138	0.269	0.118	1	TADA2B	0
chr11-62611547-62614836	0.00477287	0.35905	0.226	0.099	1	ROM1	0
chr21-42973437-42976239	0.0167374	0.358891	0.306	0.166	1	PKNOX1	0
chr12-12714084-12727188	0.97833	0.35877	0.457	0.34	1	APOLD1	0
chr16-22188293-22193103	0.485908	0.358741	0.43	0.296	1	SDR42E2	0
chr2-96264430-96268103	0.0647746	0.35873	0.285	0.17	1	CIAO1	0
chr13-110711644-110717975	0.124981	0.358608	0.527	0.365	1	ING1	0
chr8-133567276-133576404	0.746017	0.358365	0.382	0.263	1	ST3GAL1	0
chr19-36053506-36056519	0.0237702	0.358309	0.301	0.164	1	THAP8	0
chr7-112448780-112452882	0.00385904	0.3583	0.349	0.182	1	IFRD1	0
chr15-39579183-39582106	6.73334e-05	0.358043	0.204	0.069	1	THBS1	0
chr6-81749031-81754525	0.00147547	0.357536	0.274	0.127	1	FAM46A	0
chr9-121285673-121290287	0.0248557	0.357225	0.296	0.151	1	GSN	0
chr5-111755973-111758488	1.97511e-05	0.357068	0.215	0.076	1	NREP	0
chr10-69123227-69125605	0.000798028	0.356857	0.296	0.141	1	VPS26A	0
chr16-75304328-75306853	0.000103032	0.356766	0.22	0.075	1	CFDP1	0
chr10-118045742-118047685	0.000301739	0.356766	0.21	0.079	1	RAB11FIP2	0
chr9-133374520-133376823	0.00917712	0.356656	0.215	0.101	1	SURF4	0
chr6-3748041-3752706	0.012028	0.356644	0.253	0.122	1	PXDC1	0
chr16-30921481-30925475	0.0442929	0.356061	0.419	0.255	1	FBXL19	0
chr20-49811835-49814763	0.00443962	0.35605	0.253	0.122	1	SLC9A8	0
chr3-125593032-125596369	0.000861551	0.355983	0.301	0.152	1	OSBPL11	0
chr16-67393193-67398293	6.16251e-05	0.355613	0.21	0.073	1	ZDHHC1	0
chr1-156456163-156458565	0.00575638	0.35555	0.317	0.149	1	RP11-98G7.1	0
chr5-139341017-139343747	0.00194256	0.355285	0.247	0.109	1	PAIP2	0
chrX-2690370-2694682	0.0026197	0.355241	0.247	0.108	1	CD99	0
chr1-243253151-243256954	0.014488	0.355211	0.349	0.196	1	SDCCAG8	0
chr12-13205710-13212716	1.99483e-05	0.354771	0.204	0.078	1	EMP1	0
chr2-10042329-10044922	0.00233358	0.354449	0.263	0.122	1	KLF11	0
chr3-150407350-150413475	0.082311	0.354038	0.312	0.181	1	TSC22D2	0
chr11-96338075-96343914	0.236232	0.354038	0.274	0.177	1	MAML2	0
chr5-65924174-65928241	0.0403711	0.353734	0.269	0.137	1	ERBIN	0
chr2-150484050-150488064	3.42009e-05	0.353565	0.22	0.074	1	RND3	0
chr9-70409848-70414861	0.0983166	0.353219	0.387	0.242	1	KLF9	0
chr20-46405417-46408454	0.0137149	0.353018	0.274	0.149	1	ELMO2	0
chr5-172868479-172871423	0.000112872	0.352815	0.226	0.073	1	ERGIC1	0
chr13-41058208-41062937	0.138598	0.352795	0.312	0.203	1	WBP4	0
chr20-52971058-52975965	0.000214766	0.352706	0.22	0.079	1	TSHZ2	0
chr19-6515739-6519737	0.00291201	0.352629	0.226	0.099	1	TNFSF9	11261
chr7-108524412-108527349	0.0116599	0.352544	0.355	0.195	1	PNPLA8	0
chr2-207332436-207335779	0.00527596	0.351487	0.237	0.105	1	AC007879.6	61745
chr1-35554298-35561763	0.0471476	0.351385	0.296	0.155	1	KIAA0319L	0
chr1-998552-1002374	0.0175527	0.351224	0.215	0.097	1	HES4	0
chr10-24721064-24725277	0.0149061	0.351029	0.28	0.134	1	ARHGAP21	0
chr12-104454689-104461415	0.0532189	0.351013	0.29	0.165	1	CHST11	0
chr6-109093524-109096767	0.013167	0.350781	0.263	0.139	1	SESN1	0
chr17-64496039-64508293	0.172527	0.35068	0.489	0.341	1	DDX5	0
chr4-124710105-124713756	0.000529664	0.350291	0.247	0.095	1	ANKRD50	0
chr1-85297013-85298906	1.74691e-05	0.350152	0.21	0.073	1	DDAH1	19574
chr4-143335517-143338600	0.00448277	0.350129	0.215	0.087	1	GAB1	0
chr17-18182430-18188834	0.0787838	0.350012	0.306	0.175	1	ALKBH5	0
chr12-55726443-55731237	0.0111923	0.349942	0.263	0.133	1	CD63	0
chr20-53735426-53740968	0.000757321	0.349912	0.237	0.088	1	AC006076.1	58854
chr10-74150029-74152359	0.00500157	0.349895	0.285	0.142	1	ADK	0
chr11-76233845-76236973	0.000287842	0.349835	0.237	0.094	1	RP11-619A14.3	17819
chr3-136191472-136197855	0.246127	0.349614	0.328	0.207	1	MSL2	0
chr1-15798768-15801563	3.26218e-06	0.349472	0.204	0.065	0.451714	UQCRHL	5605
chr8-42049096-42053246	0.00478617	0.349453	0.296	0.144	1	KAT6A	0
chr14-51650706-51653621	0.0111386	0.349429	0.253	0.123	1	FRMD6	0
chr14-53953045-53957500	9.34367e-05	0.349396	0.204	0.069	1	BMP4	0
chr8-28399875-28403119	0.0010717	0.349289	0.258	0.115	1	ZNF395	0
chr12-569408-572984	0.000725838	0.348671	0.237	0.091	1	NINJ2	0
chr17-75978347-75980695	0.00376551	0.348479	0.29	0.129	1	ACOX1	0
chr21-42008876-42011518	0.00125449	0.348347	0.231	0.098	1	ZBTB21	0
chr13-114063599-114069430	0.123812	0.348109	0.306	0.172	1	RASA3	0
chr2-203533321-203536305	0.000321765	0.347942	0.237	0.093	1	RAPH1	0
chr19-2059541-2062261	0.00458228	0.347796	0.226	0.105	1	MKNK2	8296
chr10-69446251-69454235	0.139776	0.347591	0.231	0.122	1	TSPAN15	0
chr12-6532045-6541282	0.318206	0.347222	0.382	0.253	1	GAPDH	0
chr6-13708672-13712999	0.00554413	0.347168	0.258	0.125	1	RANBP9	0
chr1-151991753-151996281	0.031095	0.346937	0.328	0.177	1	S100A10	0
chr1-235326538-235330659	0.165748	0.346591	0.349	0.222	1	ARID4B	0
chr2-182715096-182717800	0.0265974	0.346406	0.22	0.104	1	DNAJC10	0
chr2-64985159-64991132	0.012376	0.346093	0.274	0.147	1	SLC1A4	0
chr1-23165292-23170366	0.00372212	0.346085	0.247	0.116	1	LUZP1	0
chr2-238060050-238061981	0.0076014	0.346061	0.253	0.119	1	SCLY	0
chr6-158025719-158027640	0.0026967	0.346013	0.22	0.088	1	SYNJ2	0
chr6-110178495-110182234	0.000394632	0.34592	0.247	0.104	1	CDC40	0
chr7-48084558-48090704	0.209358	0.345851	0.392	0.247	1	UPP1	0
chr8-42893153-42898767	0.0218838	0.345681	0.339	0.178	1	HOOK3	0
chr5-16932640-16938083	0.00332941	0.345466	0.226	0.097	1	MYO10	0
chr20-33992343-33996224	0.183199	0.345185	0.366	0.235	1	RALY	0
chr8-23017891-23020376	9.3644e-06	0.345139	0.21	0.071	1	RHOBTB2	0
chr22-31080462-31086071	0.0908938	0.344959	0.285	0.159	1	SMTN	0
chr11-67804336-67806627	0.00112218	0.34488	0.274	0.127	1	RP11-119D9.1	79849
chr16-68083825-68087245	0.00777266	0.344814	0.28	0.139	1	NFATC3	0
chr7-47571022-47575155	7.50064e-06	0.34442	0.204	0.059	1	TNS3	0
chr10-73167434-73168916	2.4819e-05	0.34438	0.204	0.072	1	FAM149B1	0
chr19-52535122-52536870	0.000116007	0.344116	0.215	0.075	1	ZNF808	0
chr14-68974665-68980657	0.004309	0.343932	0.28	0.136	1	ACTN1	0
chr9-40991122-40993126	0.0378563	0.343576	0.355	0.212	1	PGM5-AS1	80583
chr1-23341765-23345476	0.00269221	0.343492	0.29	0.144	1	HNRNPR	0
chr5-172763619-172774146	0.969294	0.343145	0.516	0.388	1	DUSP1	0
chr6-31399208-31404476	0.0112224	0.343027	0.339	0.172	1	MICA	0
chr16-70437001-70439935	0.00452199	0.342852	0.22	0.095	1	ST3GAL2	0
chr3-120090386-120097415	0.18631	0.34277	0.452	0.31	1	GSK3B	0
chr1-223843906-223847146	0.0253298	0.342611	0.263	0.129	1	TP53BP2	0
chr17-4966114-4970212	0.0335444	0.342611	0.366	0.205	1	SPAG7	0
chr4-101345200-101350335	0.337248	0.342414	0.312	0.203	1	PPP3CA	0
chr15-44535872-44538661	0.00211608	0.342162	0.29	0.133	1	EIF3J	0
chr14-20342129-20344316	0.0515289	0.341781	0.301	0.178	1	PARP2	0
chr15-64988768-64990605	0.0116805	0.34165	0.22	0.098	1	SPG21	0
chr18-8704085-8707905	0.00045751	0.341637	0.231	0.09	1	MTCL1	0
chr1-36148620-36152301	0.243364	0.341615	0.296	0.195	1	TRAPPC3	0
chr7-151057374-151061501	0.0450392	0.34158	0.323	0.177	1	CDK5	0
chr3-130892643-130896467	0.144095	0.34151	0.247	0.145	1	ATP2C1	0
chr2-99487933-99490988	0.0196568	0.341477	0.247	0.127	1	REV1	0
chr9-38062233-38070904	0.058226	0.341458	0.226	0.119	1	RP11-613M10.9	0
chr2-24083457-24085402	0.000469015	0.341397	0.231	0.092	1	TP53I3	0
chr5-172731222-172734352	0.00263	0.341384	0.21	0.087	1	DUSP1	33737
chr8-61710455-61715436	0.0262889	0.34129	0.274	0.143	1	ASPH	0
chr6-119346396-119351280	0.0291083	0.341251	0.247	0.127	1	MAN1A1	0
chr2-113889093-113891708	0.0531931	0.34108	0.274	0.147	1	ACTR3	0
chr20-32356875-32360290	0.00289942	0.340804	0.258	0.129	1	ASXL1	0
chr5-140664000-140665697	0.00208911	0.340677	0.215	0.094	1	WDR55	0
chr19-17074171-17080799	0.333465	0.340677	0.312	0.204	1	HAUS8	0
chr14-59481875-59485674	0.0204683	0.340578	0.263	0.132	1	JKAMP	0
chr6-63571436-63575105	0.0132496	0.340485	0.29	0.161	1	PTP4A1	0
chr11-65013323-65015023	0.000219308	0.340404	0.231	0.089	1	ARL2	0
chr22-19428730-19433480	0.0201872	0.340367	0.253	0.132	1	HIRA	0
chr12-31322723-31327150	0.0510945	0.340061	0.306	0.161	1	FAM60A	0
chr12-124565351-124569107	0.0140451	0.33991	0.274	0.128	1	NCOR2	0
chr22-31105966-31108292	0.000362556	0.339885	0.215	0.084	1	SELM	0
chr7-76289779-76292705	0.000663689	0.33968	0.22	0.091	1	SRRM3	2490
chr11-64923733-64925420	0.000126722	0.339659	0.22	0.087	1	PPP2R5B	0
chr9-19407620-19410342	0.000398643	0.339627	0.204	0.081	1	ACER2	0
chr19-19385008-19387011	0.0160839	0.339599	0.29	0.155	1	GATAD2A	0
chr13-110911567-110917051	0.530472	0.339518	0.328	0.211	1	ANKRD10	0
chr17-42673829-42680429	0.010773	0.339491	0.317	0.175	1	CCR10	0
chr10-27239816-27243728	0.0559197	0.339333	0.269	0.144	1	ACBD5	0
chr8-9149634-9153230	8.80266e-05	0.339143	0.231	0.081	1	PPP1R3B	0
chr10-110005761-110009328	0.000338344	0.338745	0.242	0.095	1	ADD3	0
chr12-121624554-121630208	0.0142657	0.338512	0.28	0.153	1	ORAI1	0
chr19-49663569-49666548	0.0515722	0.338486	0.274	0.149	1	BCL2L12	0
chr10-113678733-113682763	0.0217323	0.338185	0.269	0.139	1	CASP7	0
chr6-111481399-111484713	0.00214059	0.338113	0.269	0.129	1	REV3L	0
chr13-106532071-106536884	0.0205703	0.337925	0.301	0.159	1	EFNB2	0
chr19-46859679-46864230	0.0192879	0.337873	0.263	0.131	1	AP2S1	8686
chr14-77031127-77034711	0.00419502	0.33768	0.269	0.134	1	IRF2BPL	2427
chr2-102226852-102229777	0.0153027	0.337661	0.226	0.106	1	IL1RL2	0
chr12-76876492-76880112	0.000271676	0.337504	0.215	0.091	1	CSRP2	0
chr19-46599976-46603698	0.0269796	0.337388	0.231	0.127	1	PPP5D1	0
chr19-55115785-55118607	0.00357196	0.33728	0.215	0.092	1	PPP1R12C	0
chr10-79263216-79269095	0.0089368	0.337135	0.215	0.099	1	ZMIZ1	0
chr1-62435500-62439319	0.0702943	0.336931	0.306	0.187	1	USP1	0
chr8-54020497-54023902	0.0146557	0.33682	0.242	0.118	1	TCEA1	0
chr2-240584487-240587601	0.0867843	0.336649	0.226	0.121	1	CAPN10	0
chr16-54926352-54933952	0.0540753	0.336586	0.317	0.165	1	IRX5	0
chr4-55545017-55547815	0.0037914	0.336379	0.237	0.101	1	CLOCK	0
chr6-53347278-53349666	0.00324043	0.336357	0.237	0.098	1	ELOVL5	0
chr12-45215017-45218167	0.0255	0.336315	0.226	0.115	1	ANO6	0
chr10-70145170-70147409	0.0147084	0.336007	0.247	0.125	1	TYSND1	0
chr4-39526398-39528699	0.00276651	0.33585	0.269	0.115	1	UGDH	0
chr9-70418004-70422858	0.532299	0.335721	0.36	0.243	1	KLF9	3379
chr6-89350003-89353575	0.000355497	0.335372	0.247	0.098	1	UBE2J1	0
chr7-43645905-43651690	0.0274468	0.33535	0.231	0.127	1	COA1	0
chr1-9588210-9590491	0.000530707	0.335305	0.21	0.075	1	TMEM201	0
chr9-127223808-127226019	0.000291925	0.335235	0.247	0.104	1	GARNL3	0
chr19-2167333-2169697	0.00325959	0.335235	0.237	0.099	1	DOT1L	0
chr11-73778874-73780257	0.00265192	0.335228	0.263	0.12	1	MRPL48	7058
chr1-24742088-24747023	0.208668	0.334997	0.301	0.177	1	CLIC4	0
chr2-96815142-96817327	0.0039761	0.334618	0.253	0.126	1	CNNM3	0
chr22-29266851-29271080	0.000520489	0.334537	0.269	0.116	1	EWSR1	0
chr9-121366851-121370887	0.0014468	0.33451	0.263	0.118	1	STOM	0
chr19-2268903-2276625	0.142609	0.334373	0.269	0.145	1	LLfos-48D6.2	0
chr5-138751440-138756128	0.00419108	0.334109	0.231	0.091	1	CTNNA1	0
chr11-58576720-58580556	0.197228	0.334026	0.387	0.253	1	LPXN	0
chr17-8382446-8384345	0.00100877	0.333606	0.242	0.104	1	RPL26	0
chr5-102754124-102756598	0.00178003	0.333448	0.22	0.098	1	PAM	0
chr1-88991271-88994503	0.0427808	0.333409	0.285	0.162	1	RBMXL1	0
chr8-22691392-22696194	0.00175174	0.333025	0.269	0.125	1	EGR3	0
chr14-68778937-68787805	0.0054622	0.332982	0.29	0.153	1	ZFP36L1	0
chr12-106300661-106304464	0.0525702	0.332204	0.22	0.12	1	TCP11L2	0
chr11-3795924-3798473	0.00179302	0.332162	0.301	0.157	1	PGAP2	0
chr1-28516741-28519535	0.00143807	0.332099	0.22	0.088	1	RCC1	0
chr1-16912282-16914871	0.0168579	0.331938	0.226	0.117	1	CROCC	0
chr6-36675952-36681244	0.225927	0.33189	0.285	0.173	1	CDKN1A	0
chr11-794912-798845	0.00607751	0.331861	0.285	0.142	1	SLC25A22	0
chr12-67647398-67651907	0.0153387	0.331603	0.22	0.101	1	DYRK2	0
chr12-63843317-63846330	0.00133421	0.33158	0.204	0.076	1	SRGAP1	0
chr11-62838828-62842800	0.168087	0.331527	0.387	0.263	1	WDR74	0
chr15-75638083-75641318	0.07952	0.331385	0.29	0.153	1	IMP3	0
chr8-26575827-26580251	0.0178266	0.331281	0.253	0.128	1	DPYSL2	0
chr19-49865232-49868347	8.04196e-05	0.331166	0.258	0.103	1	PNKP	0
chr7-155203066-155207150	0.0501366	0.331137	0.312	0.173	1	AC099552.3	0
chr9-91192785-91194573	9.99144e-05	0.331121	0.21	0.069	1	LINC00484	10022
chr1-46300594-46304558	0.137547	0.331098	0.253	0.151	1	LRRC41	0
chr11-311717-317987	0.000803368	0.33084	0.21	0.087	1	IFITM1	0
chr5-74637852-74643729	0.0148647	0.330644	0.253	0.127	1	ENC1	0
chr17-40111072-40114083	0.00340527	0.330638	0.204	0.094	1	MSL1	8214
chr17-76734297-76739403	0.335361	0.330538	0.29	0.189	1	MFSD11	0
chr4-87005170-87010188	0.191118	0.33049	0.296	0.182	1	AFF1	0
chr20-40686389-40691006	0.0193481	0.330297	0.247	0.12	1	MAFB	0
chr16-23556136-23558814	0.030413	0.330174	0.263	0.141	1	UBFD1	0
chr6-85592722-85595104	0.00756857	0.329831	0.22	0.107	1	SNX14	0
chr15-31336984-31343132	0.00182359	0.329478	0.21	0.083	1	KLF13	0
chr6-44262423-44268567	0.138462	0.329284	0.258	0.147	1	NFKBIE	0
chr2-43595209-43597198	0.0012407	0.329032	0.215	0.096	1	THADA	0
chr17-40097954-40101796	0.0461599	0.328979	0.258	0.148	1	NR1D1	0
chr5-58458631-58461353	0.00827315	0.32884	0.226	0.099	1	PLK2	0
chr1-89632172-89634784	0.00621008	0.328742	0.21	0.095	1	LRRC8C	0
chr9-128419226-128421887	9.96579e-05	0.328632	0.204	0.07	1	CERCAM	0
chr4-139013784-139019833	0.0587673	0.328411	0.333	0.191	1	NOCT	0
chr2-100561975-100563766	0.0223255	0.328151	0.28	0.147	1	PDCL3	0
chr13-42039356-42042502	0.0174034	0.327931	0.253	0.121	1	DGKH	0
chr19-1265230-1268068	0.00299027	0.327721	0.21	0.091	1	CIRBP	0
chr4-118834864-118837162	0.00024247	0.327424	0.242	0.109	1	SEC24D	0
chr6-12008023-12014479	0.22137	0.327344	0.382	0.246	1	HIVEP1	0
chr1-248837278-248839809	0.136869	0.32733	0.274	0.165	1	ZNF672	0
chr3-4738462-4742422	0.00409462	0.327319	0.231	0.098	1	ITPR1	0
chr18-9913107-9916687	0.0102143	0.327235	0.317	0.162	1	VAPA	0
chr15-60369972-60377167	0.00755748	0.327081	0.226	0.097	1	ANXA2	0
chr9-107486739-107491469	0.0354014	0.326999	0.253	0.125	1	KLF4	0
chr17-44004158-44008205	0.0466042	0.326914	0.237	0.12	1	NAGS	0
chr22-41831379-41834709	0.0178571	0.326896	0.258	0.126	1	SREBF2	0
chr17-44217958-44222983	0.00245596	0.326793	0.312	0.147	1	UBTF	0
chr12-10720930-10724409	0.00580677	0.326591	0.247	0.109	1	YBX3	0
chr19-16323966-16327015	0.00046511	0.326405	0.204	0.08	1	KLF2	0
chr15-42919309-42922112	0.0172353	0.326346	0.226	0.12	1	TTBK2	0
chr19-10332286-10335310	0.00512084	0.326245	0.231	0.107	1	RAVER1	0
chr3-15205571-15208269	0.0242261	0.326059	0.226	0.117	1	CAPN7	0
chr22-38200774-38206445	0.0202079	0.325984	0.237	0.131	1	PLA2G6	0
chr3-42651369-42656721	0.0046948	0.325963	0.215	0.091	1	ZBTB47	0
chr6-113969626-113971815	0.014135	0.325957	0.21	0.098	1	HDAC2	0
chr22-20494395-20497060	0.0244205	0.325773	0.22	0.107	1	KLHL22	0
chr17-80258166-80266370	0.374622	0.325639	0.28	0.184	1	RNF213	0
chr13-48231990-48237618	0.008748	0.325072	0.242	0.114	1	ITM2B	0
chr5-32442920-32445466	0.00453222	0.32483	0.226	0.106	1	ZFR	0
chr15-84747094-84749986	0.000707637	0.324454	0.22	0.093	1	ZNF592	0
chr10-72215298-72217310	0.000386181	0.324406	0.21	0.075	1	ANAPC16	0
chr10-63628454-63631563	0.0201712	0.324162	0.231	0.119	1	REEP3	3330
chr17-62062276-62066556	0.0226326	0.323933	0.231	0.124	1	MED13	0
chr3-194571679-194576117	0.00420899	0.32393	0.22	0.095	1	TMEM44	11555
chr7-5690875-5696380	0.00731917	0.32393	0.231	0.102	1	RNF216	0
chr3-160754209-160757541	0.123046	0.323775	0.253	0.142	1	PPM1L	0
chr11-75812916-75817427	0.0518825	0.323707	0.339	0.202	1	UVRAG	0
chr9-86945149-86949122	0.0012199	0.323576	0.274	0.118	1	GAS1	0
chr2-69913755-69916336	0.111928	0.323087	0.323	0.204	1	MXD1	0
chr14-102085052-102088999	0.00913307	0.322993	0.29	0.159	1	HSP90AA1	0
chr20-62141150-62144781	0.0163516	0.322975	0.204	0.094	1	PSMA7	0
chr9-81686202-81691058	0.0334726	0.322802	0.263	0.139	1	TLE1	0
chr9-14312158-14316449	0.00730391	0.322559	0.204	0.088	1	NFIB	0
chr10-102151265-102153719	0.00860828	0.322372	0.253	0.13	1	NOLC1	0
chr10-97332574-97335470	0.0235679	0.322265	0.22	0.103	1	FRAT2	0
chr5-56908209-56910999	0.0608225	0.321843	0.269	0.151	1	SETD9	0
chr2-144514730-144524818	0.0174844	0.321824	0.274	0.146	1	ZEB2	0
chr17-2592749-2595553	0.0898159	0.321518	0.226	0.114	1	PAFAH1B1	0
chr2-99335397-99338689	0.452828	0.321376	0.269	0.184	1	EIF5B	0
chr2-239273380-239276970	0.0092074	0.321373	0.215	0.109	1	HDAC4	0
chr6-159759880-159763317	0.0120322	0.321373	0.237	0.109	1	ACAT2	0
chr13-19860686-19865376	0.140566	0.321275	0.306	0.197	1	ZMYM5	0
chr7-148697055-148701881	0.00228397	0.32084	0.242	0.104	1	CUL1	0
chr16-1609943-1615262	0.0606603	0.320711	0.306	0.178	1	CRAMP1	0
chr11-9459440-9462655	0.12648	0.320696	0.285	0.187	1	ZNF143	0
chr8-102653488-102659140	0.61583	0.32059	0.387	0.257	1	KLF10	0
chr3-58007738-58011918	0.000215401	0.320554	0.22	0.078	1	FLNB	0
chr10-72295696-72298841	0.001071	0.320554	0.28	0.134	1	DDIT4	19659
chr17-4996982-4999604	0.00121313	0.320539	0.22	0.09	1	INCA1	0
chr13-36343777-36347273	0.0027055	0.32046	0.215	0.087	1	SPG20	0
chr12-45989246-45992467	0.163206	0.320297	0.301	0.181	1	SCAF11	0
chr3-52277262-52280466	0.0150381	0.320279	0.231	0.115	1	WDR82	0
chr2-203013809-203016176	0.0193376	0.320279	0.22	0.112	1	NBEAL1	0
chr19-42279182-42286005	0.0766795	0.32027	0.36	0.216	1	CIC	0
chr15-48330415-48333074	0.00516814	0.319968	0.237	0.118	1	DUT	0
chr2-231461591-231465711	0.101858	0.319611	0.29	0.168	1	NCL	0
chr10-3886553-3888657	0.000379666	0.319395	0.215	0.079	1	RP11-464C19.3	45861
chr8-109538935-109541732	0.0524998	0.319341	0.285	0.182	1	EBAG9	0
chr16-1770289-1774545	0.00499888	0.319105	0.231	0.108	1	NME3	0
chr11-64184455-64187612	0.137313	0.319039	0.328	0.201	1	STIP1	0
chr6-43769032-43775347	0.0323532	0.318667	0.29	0.149	1	VEGFA	0
chr6-149716107-149719056	9.50738e-05	0.318653	0.231	0.082	1	AL358852.1	0
chr12-26112724-26115122	0.00378785	0.318608	0.215	0.094	1	BHLHE41	4903
chr20-23361032-23363728	0.0126975	0.318116	0.226	0.116	1	GZF1	0
chr5-132455994-132460650	0.0410872	0.318052	0.22	0.116	1	C5orf56	0
chr2-219597168-219598782	0.022139	0.317953	0.204	0.093	1	STK11IP	0
chr19-48632601-48639253	0.295934	0.317588	0.349	0.226	1	DBP	0
chr19-46849062-46851520	0.020658	0.317569	0.237	0.114	1	AP2S1	0
chr1-201954768-201956168	0.007172	0.317317	0.22	0.096	1	TIMM17A	0
chr9-93122634-93138501	0.174	0.317234	0.366	0.237	1	NINJ1	0
chr10-104119904-104122933	0.0259763	0.317024	0.344	0.183	1	SFR1	0
chr1-39407757-39409932	0.000210085	0.316985	0.226	0.095	1	MACF1	0
chr19-7196960-7198741	0.00726414	0.316801	0.215	0.089	1	INSR	0
chr14-75981025-75983248	0.000225992	0.316484	0.215	0.08	1	TGFB3	0
chr9-96416600-96421398	0.276546	0.316456	0.328	0.216	1	ZNF367	0
chr13-19780783-19783532	9.8974e-05	0.316275	0.22	0.085	1	PSPC1	0
chr1-26110391-26112866	0.00341439	0.31622	0.204	0.09	1	PDIK1L	0
chr1-9291854-9295805	0.00190152	0.316071	0.22	0.089	1	SPSB1	0
chr12-89706955-89710769	0.563218	0.315958	0.274	0.183	1	ATP2B1	0
chr1-40039115-40043110	0.202072	0.315856	0.274	0.164	1	CAP1	0
chr11-34104538-34106542	0.000544674	0.315827	0.231	0.091	1	NAT10	0
chr15-84980008-84983518	0.0182372	0.315791	0.269	0.135	1	PDE8A	0
chr15-70094643-70102460	0.267595	0.315315	0.36	0.234	1	TLE3	0
chr19-6736039-6741649	0.350522	0.31513	0.366	0.228	1	GPR108	0
chr7-112203869-112207682	0.0597717	0.315098	0.301	0.17	1	ZNF277	0
chr12-111402754-111408257	0.144651	0.315058	0.274	0.166	1	SH2B3	0
chr14-34872354-34875827	0.256187	0.314968	0.285	0.162	1	BAZ1A	0
chr17-43777943-43780559	0.00180245	0.314537	0.204	0.076	1	DUSP3	0
chr1-244652180-244654933	0.0279646	0.31451	0.306	0.169	1	DESI2	0
chr8-28889014-28891887	0.00543652	0.314482	0.29	0.152	1	INTS9	0
chr5-90408581-90410765	0.027585	0.314467	0.269	0.147	1	CETN3	0
chr22-37559890-37565485	0.00649759	0.314186	0.215	0.094	1	CDC42EP1	0
chr11-64245135-64247939	0.0303697	0.314186	0.204	0.098	1	PPP1R14B	0
chr1-2411902-2415016	0.0143555	0.313908	0.22	0.101	1	PEX10	0
chr15-98646848-98652244	0.00599826	0.313844	0.21	0.095	1	IGF1R	0
chr11-34050974-34054015	0.0285437	0.31379	0.226	0.122	1	CAPRIN1	0
chr1-38857436-38861226	0.0911947	0.313246	0.263	0.145	1	RRAGC	0
chr12-48956008-48958163	0.0112656	0.313198	0.231	0.112	1	ARF3	0
chr3-79015399-79020100	0.000271889	0.313185	0.215	0.084	1	ROBO1	0
chr1-155322159-155326025	0.411392	0.312863	0.312	0.192	1	RUSC1	0
chr2-156340372-156343815	0.026748	0.312678	0.28	0.165	1	NR4A2	0
chr9-134322613-134330454	0.0582315	0.312668	0.247	0.131	1	RXRA	0
chr16-69328213-69331274	0.00828846	0.312581	0.22	0.102	1	COG8	0
chr14-64538989-64542719	0.202441	0.31258	0.285	0.179	1	HSPA2	0
chr11-111538635-111543093	0.000164062	0.31245	0.21	0.085	1	LAYN	0
chr13-48302832-48305037	0.00961843	0.312449	0.215	0.105	1	RB1	0
chr13-60395682-60399557	0.0787701	0.312443	0.28	0.169	1	TDRD3	0
chr3-50566672-50570177	0.00975551	0.312345	0.242	0.117	1	HEMK1	0
chr19-3184794-3187283	0.0100242	0.312212	0.215	0.104	1	NCLN	0
chr1-67682485-67687318	0.182355	0.312209	0.36	0.228	1	GADD45A	0
chr1-42765772-42768115	0.0266331	0.312193	0.237	0.124	1	RP5-994D16.12	0
chr1-15947531-15954678	0.082185	0.312106	0.382	0.23	1	ZBTB17	0
chr12-53675094-53677622	0.00981211	0.312034	0.237	0.113	1	ATP5G2	0
chr1-198155295-198159858	0.157814	0.311901	0.312	0.187	1	NEK7	0
chr19-18191479-18195249	0.15845	0.311867	0.269	0.176	1	MPV17L2	0
chr19-47607840-47610990	0.00379816	0.311393	0.231	0.102	1	GLTSCR1	0
chr1-10209629-10212599	0.0261851	0.311386	0.247	0.125	1	KIF1B	0
chr10-15167260-15170308	0.0141823	0.311229	0.215	0.108	1	NMT2	0
chr14-100371287-100378278	0.063905	0.311125	0.349	0.195	1	WARS	0
chr12-124517000-124520752	0.00320343	0.311	0.204	0.082	1	NCOR2	0
chr1-6783903-6786586	0.0234231	0.310849	0.323	0.195	1	CAMTA1	0
chr22-35298622-35302093	0.191008	0.310576	0.274	0.159	1	TOM1	0
chr14-65411214-65414213	0.0181154	0.310336	0.263	0.137	1	FUT8	0
chr16-30063761-30067647	0.0653257	0.310331	0.296	0.17	1	ALDOA	0
chr6-87472369-87474033	0.000153742	0.310286	0.21	0.078	1	SLC35A1	0
chr8-25457091-25460961	0.0803941	0.310037	0.333	0.203	1	KCTD9	0
chr12-45725637-45731561	0.42094	0.310006	0.355	0.249	1	ARID2	0
chr15-56917577-56920692	0.0114137	0.309941	0.247	0.115	1	TCF12	0
chr11-66478924-66481155	0.0397504	0.309837	0.226	0.11	1	DPP3	0
chr2-218269209-218273309	0.0318424	0.309786	0.317	0.187	1	AAMP	0
chr5-134873828-134875663	0.00277572	0.30977	0.204	0.086	1	TXNDC15	0
chr12-76029877-76033440	0.0765413	0.309719	0.28	0.167	1	PHLDA1	0
chr6-30570375-30572747	0.00122249	0.309511	0.22	0.094	1	ABCF1	0
chr1-52551443-52554032	0.000219192	0.309393	0.22	0.092	1	ZCCHC11	0
chr2-171921833-171923679	0.0345221	0.30926	0.204	0.103	1	HAT1	0
chr11-78187214-78190763	0.0688165	0.309088	0.285	0.16	1	USP35	0
chr9-132669237-132673846	0.028701	0.309002	0.253	0.128	1	GTF3C4	0
chr18-3602378-3606630	0.0120934	0.308663	0.269	0.14	1	DLGAP1	0
chr15-58770218-58772470	0.077112	0.308663	0.242	0.132	1	FAM63B	0
chr19-37217467-37219119	0.000315909	0.30854	0.21	0.082	1	ZNF383	0
chr13-30306344-30308023	0.00701037	0.3083	0.21	0.094	1	KATNAL1	0
chr9-128190760-128193593	0.00709024	0.308177	0.21	0.093	1	CIZ1	0
chr16-11792482-11798940	0.00830931	0.308121	0.296	0.152	1	ZC3H7A	0
chr2-36354771-36359456	0.154461	0.308087	0.215	0.119	1	CRIM1	0
chr19-54462144-54465463	0.0760253	0.307983	0.344	0.202	1	LENG9	0
chr2-128026539-128029371	0.0233927	0.307962	0.328	0.197	1	SAP130	0
chr1-47333086-47335215	0.0437311	0.307856	0.22	0.119	1	CMPK1	0
chr10-95560260-95561925	3.43512e-05	0.307784	0.204	0.075	1	SORBS1	0
chr5-132468821-132493402	0.537023	0.307629	0.575	0.431	1	IRF1	0
chr6-41071419-41074863	0.372883	0.307624	0.312	0.219	1	OARD1	0
chr9-33262910-33266721	0.306565	0.307314	0.274	0.178	1	BAG1	0
chr3-172707045-172711815	0.261307	0.307129	0.237	0.141	1	NCEH1	0
chr13-42271189-42273242	0.00940212	0.307123	0.226	0.105	1	AKAP11	0
chr1-15846791-15850512	0.0419315	0.307119	0.269	0.14	1	SPEN	0
chr15-89820721-89823895	0.0011816	0.306412	0.21	0.073	1	ANPEP	5319
chr17-48045207-48056248	0.80285	0.306293	0.392	0.281	1	NFE2L1	0
chr13-51801586-51806910	0.0330525	0.30622	0.349	0.2	1	DHRS12	0
chr19-47109296-47114769	0.0521316	0.306187	0.355	0.215	1	ZC3H4	0
chr4-186723013-186729519	0.00262099	0.305991	0.204	0.089	1	FAT1	0
chr16-53501190-53505074	0.24178	0.305962	0.317	0.195	1	AKTIP	0
chr11-57565315-57569882	0.00909522	0.305842	0.258	0.128	1	UBE2L6	0
chr11-13667412-13670207	0.0705626	0.305834	0.242	0.147	1	FAR1	0
chr12-124681131-124689033	0.182412	0.305699	0.242	0.122	1	SCARB1	87822
chr4-15001064-15006827	0.208767	0.305652	0.333	0.208	1	CPEB2	0
chr9-129173390-129178919	0.179983	0.305562	0.312	0.189	1	IER5L	0
chr17-42015613-42018327	0.00802908	0.305436	0.204	0.082	1	DNAJC7	0
chr10-102916815-102919437	0.100397	0.30542	0.258	0.153	1	CNNM2	0
chr10-28531653-28534484	0.104501	0.305334	0.242	0.139	1	WAC	0
chr3-43286040-43290261	0.00285984	0.304913	0.215	0.094	1	SNRK	0
chr19-38830861-38832541	0.00101576	0.304672	0.22	0.095	1	ECH1	0
chr22-41443314-41449878	0.883103	0.304346	0.371	0.267	1	TOB2	0
chr20-21125077-21127026	0.00725918	0.304149	0.226	0.106	1	KIZ	0
chr17-28716770-28721189	0.140572	0.304119	0.29	0.169	1	RAB34	0
chr1-155206610-155209622	0.0225142	0.304117	0.21	0.099	1	MTX1	0
chr14-90382027-90384937	0.163248	0.304029	0.263	0.17	1	RP11-471B22.3	0
chr22-21000921-21003221	0.0184416	0.303779	0.237	0.117	1	THAP7	0
chr6-26122354-26127397	0.102311	0.303738	0.312	0.201	1	HIST1H2AC	0
chr1-65001007-65003767	0.0505445	0.30371	0.22	0.109	1	LINC01359	0
chr6-30100462-30103896	0.120066	0.303651	0.231	0.125	1	TRIM31	0
chr1-153531946-153537156	0.109731	0.303614	0.312	0.175	1	S100A6	0
chr6-36593300-36597177	0.0438135	0.303528	0.263	0.135	1	SRSF3	0
chr22-37804610-37808632	0.0397884	0.303502	0.215	0.097	1	GCAT	0
chr8-144426411-144430182	0.000413794	0.303454	0.21	0.084	1	VPS28	0
chr6-20400240-20405122	0.729764	0.303144	0.344	0.236	1	E2F3	0
chr13-26253592-26256115	0.00104808	0.30274	0.22	0.097	1	CDK8	0
chr2-24970772-24973092	0.0568302	0.302615	0.269	0.157	1	DNAJC27	0
chr4-83033648-83036223	0.14476	0.302576	0.253	0.154	1	COPS4	0
chr20-49275447-49280220	0.163386	0.302533	0.366	0.221	1	ZNFX1	0
chr1-8815541-8818959	0.0100736	0.302455	0.21	0.094	1	RERE	0
chr11-128520399-128524278	0.0875376	0.3024	0.274	0.155	1	ETS1	0
chr11-62725377-62730409	0.483113	0.302392	0.323	0.213	1	TTC9C	0
chr7-149090089-149092124	0.00350136	0.302253	0.237	0.103	1	ZNF786	0
chr3-122513543-122515407	0.006722	0.302017	0.21	0.096	1	KPNA1	0
chr11-33038848-33041110	0.0358515	0.302016	0.21	0.106	1	TCP11L1	0
chr1-226661418-226665164	0.0320022	0.30175	0.269	0.146	1	ITPKB	0
chr12-6850700-6853834	0.599693	0.301726	0.376	0.272	1	USP5	0
chr6-28895291-28898676	0.00340492	0.301653	0.274	0.133	1	TRIM27	4325
chr12-25249536-25252197	0.0114723	0.30163	0.21	0.094	1	KRAS	0
chr11-94127580-94132709	0.102769	0.301564	0.301	0.181	1	PANX1	0
chr1-230102678-230106447	0.0154623	0.301535	0.21	0.093	1	GALNT2	0
chr17-47648620-47651214	0.206398	0.301534	0.306	0.195	1	KPNB1	0
chr12-57842586-57848057	0.0221116	0.3015	0.226	0.109	1	CTDSP2	0
chr15-52677313-52680387	0.0249864	0.301477	0.317	0.175	1	FAM214A	0
chr1-184753803-184756146	0.0497073	0.301477	0.296	0.178	1	EDEM3	0
chr12-123971514-123974224	0.0142517	0.301388	0.21	0.092	1	RP11-214K3.25	0
chr2-210169756-210172446	0.0125061	0.301306	0.231	0.106	1	KANSL1L	0
chr1-243848440-243851753	0.0110767	0.301294	0.204	0.094	1	AKT3	0
chr15-42272376-42276061	0.322596	0.301286	0.258	0.159	1	GANC	0
chr3-38022206-38026270	0.330489	0.301089	0.323	0.216	1	PLCD1	0
chr2-27428025-27431984	0.137891	0.301078	0.242	0.136	1	NRBP1	0
chr2-27369319-27371959	0.364778	0.301058	0.253	0.151	1	EIF2B4	0
chr12-49055753-49061653	0.144586	0.301009	0.258	0.146	1	KMT2D	0
chr6-145813244-145816402	0.00276188	0.300978	0.237	0.108	1	FBXO30	0
chr22-49934051-49938427	0.155562	0.300959	0.226	0.12	1	CITF22-49E9.3	0
chr6-151389264-151393312	0.037098	0.300957	0.312	0.186	1	ZBTB2	0
chr2-219176019-219179197	0.0493717	0.300751	0.263	0.13	1	CNPPD1	0
chr6-16758183-16765012	0.401529	0.300626	0.328	0.225	1	ATXN1	0
chr1-155133386-155137566	0.0247863	0.300514	0.312	0.16	1	SLC50A1	0
chr12-49704931-49708129	0.0412418	0.30044	0.258	0.132	1	FMNL3	0
chr17-28948293-28954274	0.41704	0.300394	0.339	0.218	1	PHF12	0
chr19-16075624-16081364	0.276689	0.300352	0.28	0.171	1	TPM4	0
chr7-56050269-56052655	0.00455869	0.300159	0.263	0.132	1	CCT6A	0
chr18-74596578-74599194	0.0871188	0.300127	0.22	0.119	1	ZNF407	0
chr1-9685620-9690428	0.00155015	0.300089	0.22	0.094	1	PIK3CD	0
chr19-44889936-44891840	0.0425263	0.299984	0.355	0.203	1	TOMM40	0
chr21-38804164-38811850	0.191066	0.299903	0.328	0.192	1	ETS2	0
chr4-173369215-173373285	0.123805	0.299893	0.296	0.184	1	SAP30	0
chr5-137751657-137755533	0.0637637	0.29985	0.28	0.165	1	HNRNPA0	0
chr2-46540653-46545655	0.144007	0.299849	0.237	0.128	1	RHOQ	0
chr7-5591147-5597183	0.411839	0.29978	0.237	0.139	1	FSCN1	0
chr19-56119052-56122248	0.04926	0.299775	0.226	0.111	1	ZNF787	0
chr1-29176456-29182801	0.10091	0.299766	0.247	0.132	1	SRSF4	0
chr6-30612198-30618801	0.279277	0.299731	0.323	0.215	1	MRPS18B	0
chr4-98657064-98660636	0.00222439	0.299713	0.231	0.108	1	TSPAN5	0
chr2-73068048-73072562	0.0298395	0.299522	0.269	0.139	1	SFXN5	0
chr7-74475339-74484097	0.161747	0.299483	0.258	0.137	1	GTF2IRD1	0
chr1-15523685-15527917	0.538315	0.299236	0.376	0.252	1	CASP9	0
chr6-159691019-159694736	0.0327709	0.299173	0.242	0.127	1	SOD2	0
chr1-16366714-16368956	0.135817	0.299125	0.258	0.145	1	SZRD1	0
chr9-91419036-91426566	0.171494	0.299095	0.333	0.199	1	NFIL3	0
chr18-3593066-3597135	0.517292	0.298898	0.296	0.202	1	DLGAP1	0
chr15-31433167-31436692	0.103799	0.298816	0.247	0.15	1	KLF13	0
chr17-21213146-21216388	0.0833318	0.29879	0.242	0.132	1	TMEM11	0
chr19-49675557-49679655	0.461843	0.298652	0.344	0.227	1	PRMT1	0
[truncated: 523 more rows]
