# Supplementary material for: Single-cell sequencing highlights heterogeneity and malignant progression in actinic keratosis and cutaneous squamous cell carcinoma
Source: eLife journal article supplement (doi:10.7554/elife.85270), 2023-12-15
Supplement: supp1 [file supplementary file 1a-1u 1x-1z.xlsx]

## Sheet: Supplementary file 1a
Supplementary file 1a Clinical characteristic of patients and samples enrolled in single-cell sequencing.
Patient	Gender	Age	Primary	Diagnosis	Sample	Description	Histological	Risk	scRNA-seq	scATAC-seq
			site				grades	classification
P1	Female	77	Face	AK	S1	AK	AK Ⅱ	/	√	/
					S2	Normal	/	/	√	/
P2	Female	78	Face	AK + SCCIS	S3	AK	AK Ⅱ	/	√	/
					S4	SCCIS	/	/	√	/
					S5	Normal	/	/	√	/
P3	Female	68	Face	AK	S6	AK	AK Ⅰ	/	√	/
					S7	Normal	/	/	√	/
P4	Female	68	Dorsal hand	cSCC	S8	cSCC	Ⅰ	Low-risk	√	/
					S9	Normal	/	/	√	/
P5	Male	81	Temple	cSCC	S10	cSCC	Ⅲ	High-risk	√	√
					S11	Normal	/	/	√	/
P6	Female	68	Face	cSCC	S12	cSCC	Ⅱ	High-risk	√	/
					S13	Normal	/	/	√	/

## Sheet: Supplementary file 1b
Supplementary file 1b The gene list of up-regulated DEGs in AK Basal1 subpopulation.
	p_val	avg_log2FC	pct.1	pct.2	p_val_adj
IGFBP2	1.45e-55	1.2633	0.481	0.289	3.57e-51
FOSB	1.95e-209	1.2373	0.942	0.884	4.8e-205
BTG2	2.72e-214	1.2311	0.931	0.807	6.69e-210
ALDH3A1	5.17e-148	1.15473	0.772	0.48	1.27e-143
EGR1	4.54e-176	1.12825	0.943	0.813	1.12e-171
CALML5	2.25e-86	1.06748	0.732	0.526	5.53e-82
CST6	1.97e-38	1.03984	0.216	0.074	4.84e-34
IGFBP6	3.97e-53	1.00533	0.294	0.109	9.76e-49
MTRNR2L12	8.54e-68	0.986218	0.437	0.169	2.1e-63
CXCL14	5.38e-117	0.94112	0.995	0.982	1.32e-112
EGR3	4.09e-130	0.933477	0.7	0.39	1.01e-125
ATF3	1.3e-139	0.912485	0.955	0.877	3.2e-135
NFKBIZ	4.97e-91	0.907181	0.821	0.79	1.22e-86
LRRC75A	7.36e-41	0.878074	0.343	0.178	1.81e-36
RND3	1.6e-121	0.877615	0.917	0.876	3.92e-117
GOLGB1	3.23e-111	0.864855	0.855	0.791	7.94e-107
NR4A1	1.42e-121	0.835691	0.902	0.813	3.5e-117
HIST1H1E	9.81e-92	0.821725	0.533	0.269	2.41e-87
FOS	2.46e-104	0.806709	0.994	0.974	6.06e-100
SOX4	4.57e-43	0.80381	0.621	0.494	1.12e-38
TYRP1	1.57e-34	0.790063	0.172	0.051	3.85e-30
COL17A1	1.65e-84	0.764739	0.908	0.879	4.06e-80
IGFBP5	7.03e-59	0.752552	0.35	0.134	1.73e-54
WEE1	7.91e-96	0.743836	0.742	0.536	1.94e-91
DSP	1.48e-95	0.735102	0.993	0.99	3.63e-91
TOB1	2.98e-104	0.731437	0.825	0.677	7.32e-100
KRT15	8.28e-104	0.725905	0.939	0.649	2.04e-99
XIST	3.24e-79	0.714	0.838	0.782	7.96e-75
SYNE2	1.16e-93	0.711647	0.882	0.842	2.86e-89
MT-ND1	3.75e-246	0.710902	0.996	0.994	9.22e-242
CCNL1	1.59e-123	0.707844	0.931	0.929	3.92e-119
DSC3	6.57e-104	0.700033	0.98	0.963	1.62e-99
BCAM	2.07e-93	0.691955	0.506	0.219	5.1e-89
TNFAIP3	9.15e-32	0.686232	0.77	0.769	2.25e-27
RHOB	2.65e-39	0.675607	0.801	0.711	6.51e-35
JUN	1.31e-118	0.671662	0.998	0.989	3.22e-114
DSG1	9.34e-39	0.669558	0.859	0.8	2.3e-34
OVOL1	9.73e-57	0.668285	0.768	0.699	2.39e-52
ETS2	1.04e-60	0.667872	0.886	0.898	2.56e-56
NCOA7	1.16e-59	0.665528	0.883	0.872	2.84e-55
IFFO2	3.49e-44	0.651618	0.659	0.558	8.58e-40
PTPRZ1	2.05e-64	0.646498	0.602	0.398	5.05e-60
AC020916.1	3.7e-59	0.635588	0.525	0.314	9.1e-55
JUND	1.94e-76	0.635502	0.951	0.977	4.78e-72
TXNIP	1.96e-60	0.624581	0.825	0.595	4.82e-56
IFI6	3.43e-18	0.622628	0.315	0.211	8.43e-14
MT-ND6	2.83e-39	0.620543	0.639	0.5	6.95e-35
AHNAK	1.28e-96	0.61139	0.951	0.95	3.15e-92
ODC1	6.49e-35	0.606903	0.602	0.47	1.6e-30
CLSTN1	1.25e-53	0.598865	0.739	0.652	3.08e-49
EPHB6	6.05e-60	0.59405	0.68	0.476	1.49e-55
ITPKC	6.78e-50	0.592235	0.639	0.495	1.67e-45
NEFM	3.72e-63	0.577589	0.227	0.046	9.13e-59
WNT4	3.32e-62	0.571152	0.712	0.525	8.16e-58
HNRNPU	3.11e-85	0.569396	0.955	0.956	7.64e-81
BRD2	5.08e-65	0.564567	0.844	0.849	1.25e-60
HNRNPH1	1.96e-58	0.563257	0.851	0.771	4.82e-54
REL	5.72e-61	0.562972	0.866	0.884	1.4e-56
EDN1	1.37e-28	0.558553	0.463	0.313	3.38e-24
PIK3R1	1.44e-47	0.554312	0.554	0.366	3.55e-43
RAP2B	8.55e-48	0.551335	0.77	0.739	2.1e-43
NFIX	2.52e-61	0.550938	0.753	0.621	6.19e-57
FTH1	3.98e-50	0.54784	0.981	0.988	9.77e-46
ERRFI1	2.72e-18	0.546717	0.571	0.497	6.68e-14
DUSP1	2.63e-46	0.537592	0.968	0.968	6.47e-42
SYT8	3.28e-28	0.537144	0.452	0.305	8.07e-24
KRTDAP	5.24e-18	0.536762	0.926	0.911	1.29e-13
ZFAND5	2.15e-47	0.53234	0.807	0.787	5.28e-43
VMP1	3.14e-33	0.52911	0.742	0.719	7.72e-29
PLK3	1.73e-38	0.523605	0.648	0.573	4.24e-34
SH3PXD2A	1.16e-44	0.522599	0.626	0.48	2.85e-40
MT-ND2	6.89e-147	0.518692	0.992	0.99	1.69e-142
LAMB3	2.08e-41	0.513192	0.644	0.51	5.12e-37
NFIB	1.43e-38	0.511017	0.726	0.622	3.52e-34
DDIT3	1.09e-32	0.507715	0.53	0.388	2.68e-28
SLC7A8	6.28e-41	0.506852	0.39	0.221	1.54e-36
KLF6	1.65e-59	0.503234	0.96	0.927	4.06e-55
SETD2	1.58e-51	0.498745	0.623	0.463	3.89e-47
VIM	5.35e-13	0.494009	0.302	0.217	1.32e-08
DSC1	6.07e-31	0.492581	0.369	0.211	1.49e-26
KLF9	2.7e-49	0.490479	0.533	0.331	6.65e-45
ATRX	5.49e-42	0.489786	0.761	0.74	1.35e-37
SQSTM1	1.38e-44	0.489224	0.86	0.853	3.4e-40
ADRB2	1.68e-19	0.488698	0.574	0.475	4.13e-15
DDX3X	6.17e-49	0.488231	0.911	0.913	1.52e-44
CDKN2A	3.82e-32	0.486837	0.333	0.188	9.4e-28
COL7A1	1.22e-49	0.486045	0.546	0.345	3.01e-45
PMEL	2.37e-19	0.485716	0.155	0.067	5.83e-15
ZFP36	9.43e-52	0.483846	0.945	0.936	2.32e-47
CTNNB1	2.26e-29	0.482499	0.62	0.528	5.55e-25
KRT1	5.76e-23	0.480482	0.954	0.885	1.42e-18
FUS	2.6e-62	0.479418	0.916	0.94	6.38e-58
NORAD	2.59e-42	0.477089	0.724	0.648	6.37e-38
ARGLU1	1.09e-43	0.475465	0.82	0.8	2.69e-39
TSC22D1	4.83e-26	0.471698	0.735	0.653	1.19e-21
ANKLE2	1.63e-44	0.470563	0.676	0.589	4e-40
PSAP	4.24e-37	0.467187	0.772	0.758	1.04e-32
SESN3	2.15e-35	0.463487	0.498	0.343	5.28e-31
ATF7IP	2.42e-51	0.463412	0.462	0.258	5.96e-47
ASH1L	4.39e-39	0.460865	0.706	0.615	1.08e-34
KLF4	6.36e-27	0.460302	0.802	0.83	1.56e-22
DENND2C	1.8e-26	0.459251	0.654	0.615	4.42e-22
SGK1	4.51e-11	0.452963	0.773	0.791	1.11e-06
ARHGAP5	8.69e-35	0.45138	0.677	0.589	2.14e-30
EIF5	5.01e-64	0.449425	0.925	0.95	1.23e-59
KLF13	3.56e-46	0.449185	0.791	0.782	8.75e-42
PELI1	3.06e-40	0.448883	0.571	0.42	7.53e-36
YWHAZ	6.88e-56	0.448165	0.97	0.982	1.69e-51
BOD1L1	1.44e-32	0.447571	0.754	0.764	3.54e-28
SMG1	6.14e-45	0.447233	0.711	0.604	1.51e-40
PRRC2B	4.69e-45	0.44645	0.599	0.424	1.15e-40
DDX6	4.97e-36	0.445023	0.635	0.523	1.22e-31
KDM6B	1.41e-29	0.444217	0.676	0.639	3.47e-25
TPR	1.81e-39	0.443629	0.835	0.817	4.45e-35
EXPH5	5.79e-31	0.44292	0.621	0.5	1.42e-26
EZR	3.44e-50	0.442394	0.921	0.927	8.45e-46
TUBA1A	7.2e-27	0.439612	0.404	0.26	1.77e-22
SPAG9	1.31e-37	0.432085	0.792	0.774	3.22e-33
GPX4	7.83e-46	0.431661	0.895	0.901	1.92e-41
SFRP1	2.25e-17	0.430328	0.48	0.388	5.52e-13
GPNMB	3.13e-36	0.430158	0.864	0.843	7.7e-32
GTF2I	4.09e-34	0.429705	0.779	0.792	1.01e-29
HIST1H1D	1.12e-25	0.429518	0.319	0.187	2.74e-21
IRF1	3.1e-11	0.428854	0.757	0.802	7.62e-07
EGR2	2.6e-42	0.428776	0.473	0.271	6.39e-38
PPP1CB	8.16e-23	0.428149	0.746	0.748	2.01e-18
DDX39B	5.68e-55	0.426597	0.503	0.285	1.4e-50
CDC42EP4	6.31e-25	0.424451	0.56	0.468	1.55e-20
YPEL5	2.16e-28	0.424392	0.654	0.58	5.31e-24
NIPBL	1.35e-33	0.423651	0.666	0.582	3.32e-29
ADNP	1.06e-32	0.423341	0.524	0.376	2.6e-28
PPP1R15A	1.8e-53	0.423302	0.967	0.98	4.43e-49
SLC7A1	1.63e-32	0.422889	0.638	0.556	4.01e-28
ARL5B	2.35e-35	0.421901	0.61	0.496	5.79e-31
DST	1.08e-16	0.420515	0.944	0.944	2.65e-12
TTC3	2.71e-29	0.420499	0.607	0.5	6.66e-25
HP1BP3	1.3e-27	0.420359	0.782	0.77	3.2e-23
TNRC6B	3.77e-36	0.418674	0.633	0.51	9.28e-32
MAP4	7.55e-28	0.418572	0.714	0.679	1.86e-23
TSC22D3	4.09e-42	0.417416	0.485	0.294	1e-37
SERPINB5	1.96e-30	0.417296	0.886	0.916	4.83e-26
AHNAK2	3.07e-30	0.417072	0.743	0.653	7.54e-26
EFNB2	2.72e-26	0.415992	0.421	0.286	6.69e-22
ARL4C	2.55e-19	0.413675	0.644	0.583	6.26e-15
CCDC47	1.49e-35	0.413379	0.814	0.814	3.66e-31
IFRD1	3.99e-29	0.412939	0.731	0.699	9.8e-25
LRRFIP1	2.3e-34	0.412444	0.836	0.891	5.66e-30
EIF4A2	1.25e-44	0.412378	0.856	0.862	3.07e-40
IRS2	1.88e-32	0.412107	0.501	0.368	4.61e-28
ARIH1	5.75e-31	0.412044	0.618	0.519	1.41e-26
CEP350	1.18e-27	0.41175	0.588	0.491	2.9e-23
IER2	2.83e-43	0.411537	0.986	0.985	6.96e-39
NRIP1	2.42e-43	0.410122	0.397	0.213	5.95e-39
ELL2	7.94e-31	0.40891	0.582	0.468	1.95e-26
MCL1	8.74e-48	0.408696	0.889	0.924	2.15e-43
RASGEF1B	2.75e-29	0.408538	0.412	0.265	6.75e-25
DNAJB4	5.38e-29	0.407086	0.648	0.547	1.32e-24
PER2	1.01e-44	0.406879	0.498	0.297	2.48e-40
UBB	1.22e-39	0.404745	0.993	0.903	3e-35
CREBRF	3.64e-32	0.403198	0.555	0.426	8.96e-28
KLF5	2.73e-48	0.402712	0.903	0.906	6.7e-44
CHD4	2.18e-28	0.402245	0.699	0.656	5.35e-24
DDX17	1.07e-27	0.401989	0.805	0.824	2.63e-23
CCND2	2.62e-32	0.40181	0.593	0.444	6.44e-28
MAT2A	8.63e-16	0.401715	0.626	0.589	2.12e-11
TOB2	1.13e-34	0.401253	0.666	0.549	2.77e-30
LMNA	1.89e-44	0.400354	0.966	0.986	4.64e-40
FKBP5	2.23e-32	0.398852	0.467	0.326	5.49e-28
MXD1	8.45e-33	0.398597	0.523	0.382	2.08e-28
LGALSL	4.85e-10	0.397876	0.566	0.531	1.19e-05
ARHGEF12	1.38e-33	0.396483	0.59	0.445	3.39e-29
CHD3	1.23e-31	0.396038	0.551	0.413	3.03e-27
CDH13	1.75e-34	0.395914	0.478	0.323	4.31e-30
TM4SF1	9.93e-15	0.395724	0.389	0.295	2.44e-10
C6orf62	8.2e-30	0.394594	0.615	0.498	2.02e-25
APCDD1	5.02e-35	0.394169	0.609	0.459	1.23e-30
AZIN1	1.12e-30	0.392742	0.622	0.53	2.76e-26
MGST1	3.18e-44	0.390547	0.485	0.263	7.81e-40
N4BP2L2	2.25e-29	0.390398	0.7	0.641	5.53e-25
ALDH3A2	3.81e-19	0.389032	0.737	0.713	9.37e-15
NRG1	1.96e-22	0.388844	0.358	0.234	4.81e-18
NKTR	1.02e-19	0.388379	0.65	0.612	2.5e-15
TOP2B	1.77e-29	0.387413	0.562	0.444	4.36e-25
MTRNR2L8	3.78e-24	0.38592	0.264	0.133	9.28e-20
PHLDB2	1.52e-21	0.384995	0.589	0.502	3.73e-17
KIAA1217	3.33e-25	0.384699	0.585	0.489	8.17e-21
SLC20A1	2.57e-19	0.384315	0.589	0.506	6.32e-15
EIF2AK2	2.22e-28	0.384081	0.472	0.334	5.46e-24
SPEN	6.04e-20	0.38311	0.637	0.587	1.48e-15
RBM6	4.48e-18	0.382279	0.486	0.394	1.1e-13
FGD6	1.95e-25	0.382268	0.516	0.394	4.8e-21
DCT	8.07e-17	0.381953	0.116	0.044	1.98e-12
TRPS1	1.98e-49	0.381407	0.437	0.23	4.86e-45
EP300	2.08e-33	0.381254	0.541	0.395	5.1e-29
INTS6	1.2e-29	0.381137	0.687	0.594	2.95e-25
TIPARP	1.72e-19	0.380878	0.724	0.717	4.23e-15
CIRBP	1.4e-42	0.379212	0.875	0.88	3.43e-38
BCL11A	5.52e-27	0.379035	0.542	0.408	1.36e-22
MT-CO3	7.19e-84	0.378963	0.999	0.996	1.77e-79
MEF2A	4.24e-23	0.378842	0.657	0.606	1.04e-18
CDK13	1.33e-29	0.378588	0.555	0.433	3.26e-25
AKAP9	1.83e-30	0.377187	0.813	0.812	4.51e-26
TMF1	3.44e-24	0.377079	0.564	0.464	8.46e-20
ZBTB43	2.32e-18	0.376667	0.634	0.622	5.71e-14
KMT2A	2.03e-25	0.37632	0.667	0.61	5e-21
BPTF	3.23e-25	0.375247	0.747	0.752	7.93e-21
RB1CC1	2.02e-24	0.374597	0.683	0.648	4.97e-20
DDX42	7.48e-30	0.373339	0.579	0.454	1.84e-25
AFF4	6.18e-29	0.373169	0.671	0.607	1.52e-24
PRDM2	7.76e-21	0.370738	0.606	0.533	1.91e-16
R3HDM2	4.94e-30	0.370734	0.465	0.306	1.21e-25
B4GALT1	1.14e-15	0.370685	0.518	0.443	2.8e-11
SPTBN1	1.75e-19	0.369109	0.581	0.501	4.29e-15
CSDE1	4.1e-30	0.367813	0.838	0.871	1.01e-25
HSP90AB1	3.23e-47	0.367351	0.998	0.999	7.94e-43
UGDH	3.3e-10	0.3671	0.484	0.439	8.1e-06
CDKN1C	3.55e-07	0.365846	0.261	0.204	0.00873874
RXRA	5.06e-26	0.365522	0.558	0.447	1.25e-21
CCNL2	1.62e-31	0.364776	0.537	0.406	3.98e-27
CANX	3.31e-26	0.364372	0.805	0.784	8.13e-22
APP	1.74e-17	0.362849	0.721	0.708	4.28e-13
CLCA2	7.03e-16	0.361707	0.827	0.808	1.73e-11
ZNF638	4.65e-25	0.360583	0.537	0.408	1.14e-20
SLC7A5	1.05e-21	0.360386	0.595	0.538	2.57e-17
TRIP12	2.56e-23	0.36014	0.541	0.44	6.28e-19
ZFP36L2	1.92e-21	0.359328	0.902	0.928	4.71e-17
B3GNT5	6.3e-24	0.3586	0.555	0.457	1.55e-19
SRRM2	2.58e-36	0.357134	0.866	0.924	6.35e-32
WTAP	6.37e-22	0.356862	0.722	0.71	1.57e-17
C1orf56	6e-10	0.355195	0.153	0.094	1.47e-05
SLC38A2	3.31e-40	0.354989	0.919	0.938	8.14e-36
PCM1	2.19e-19	0.354246	0.612	0.554	5.38e-15
ZKSCAN1	1.67e-23	0.351993	0.474	0.352	4.1e-19
MAP3K8	2.91e-12	0.351711	0.616	0.605	7.15e-08
MT-ND3	1.13e-70	0.351691	0.994	0.994	2.79e-66
DHX36	8.11e-24	0.35158	0.721	0.718	1.99e-19
KLF10	1.05e-22	0.35155	0.783	0.787	2.58e-18
PABPC1	3.77e-60	0.35151	0.974	0.988	9.26e-56
ZNF326	5.66e-24	0.351398	0.706	0.668	1.39e-19
SFPQ	1.4e-37	0.35095	0.905	0.942	3.45e-33
TOR1AIP2	1.62e-20	0.350675	0.711	0.678	3.98e-16
SLK	1.22e-16	0.350217	0.699	0.697	2.99e-12
KIAA0232	1.88e-40	0.349952	0.394	0.211	4.62e-36
MIA3	8.82e-20	0.349486	0.527	0.432	2.17e-15
GOLGA4	4.3e-29	0.347094	0.883	0.906	1.06e-24
RBM5	9.35e-27	0.345771	0.527	0.399	2.3e-22
KAT6A	3.71e-32	0.345726	0.498	0.34	9.12e-28
BRD1	8.72e-31	0.345218	0.491	0.334	2.14e-26
MALAT1	7.45e-25	0.344212	0.998	0.998	1.83e-20
HSP90AA1	4.71e-37	0.343387	1	1	1.16e-32
DSG3	2.75e-25	0.343259	0.85	0.9	6.76e-21
MAFF	1.6e-24	0.34315	0.689	0.643	3.93e-20
LAMA3	2.25e-34	0.342489	0.502	0.336	5.52e-30
ANKRD12	2.43e-25	0.342396	0.82	0.87	5.96e-21
PNISR	2.25e-24	0.340997	0.777	0.78	5.54e-20
FOSL1	2.55e-14	0.340977	0.583	0.531	6.26e-10
MACF1	3.16e-17	0.340953	0.758	0.755	7.76e-13
MAPK6	1.31e-16	0.340611	0.636	0.621	3.22e-12
NEAT1	7.65e-32	0.340324	0.984	0.989	1.88e-27
BIRC6	2.39e-21	0.339837	0.485	0.371	5.88e-17
MYCBP2	4.26e-15	0.338995	0.706	0.685	1.05e-10
CCDC6	1.18e-17	0.338552	0.657	0.603	2.91e-13
PHF3	3.09e-19	0.338449	0.605	0.524	7.61e-15
PLEC	1.37e-19	0.338441	0.651	0.626	3.38e-15
SMC5	2.84e-23	0.337978	0.59	0.491	6.97e-19
ITGA2	8.1e-08	0.337571	0.579	0.571	0.00199237
TRIM38	1.28e-38	0.33753	0.387	0.203	3.15e-34
FOXC1	1.37e-31	0.335916	0.219	0.087	3.36e-27
SCAF11	1.23e-24	0.335544	0.796	0.799	3.04e-20
BCLAF1	1.34e-27	0.335139	0.791	0.826	3.3e-23
OGFRL1	1.59e-20	0.334235	0.509	0.397	3.92e-16
FNBP4	1.5e-20	0.332552	0.672	0.632	3.68e-16
P2RY1	9.66e-25	0.332434	0.407	0.274	2.37e-20
ZNF267	5.41e-26	0.331591	0.42	0.285	1.33e-21
RNF152	7.12e-14	0.330812	0.355	0.263	1.75e-09
NCOR2	1.13e-29	0.330585	0.453	0.303	2.79e-25
GLUL	2.1e-13	0.330455	0.733	0.725	5.17e-09
PALMD	1.15e-16	0.330065	0.646	0.594	2.82e-12
DDX5	5.26e-35	0.328111	0.979	0.99	1.29e-30
SIRT1	7.18e-29	0.32787	0.395	0.243	1.76e-24
FILIP1L	1.57e-16	0.327795	0.264	0.163	3.86e-12
NFIC	1.88e-28	0.32765	0.817	0.812	4.61e-24
TNFRSF21	2.07e-33	0.327217	0.312	0.161	5.09e-29
CD46	2.68e-21	0.327066	0.588	0.496	6.59e-17
N4BP1	7.05e-20	0.326857	0.577	0.512	1.73e-15
ELF3	2.5e-11	0.325862	0.281	0.199	6.15e-07
ACTR2	7.24e-14	0.325801	0.724	0.734	1.78e-09
DNAJA1	2.82e-28	0.325506	0.973	0.982	6.94e-24
PRPF8	2.87e-16	0.324659	0.577	0.514	7.06e-12
SUPT6H	2.38e-23	0.322377	0.591	0.49	5.85e-19
CAVIN1	5.18e-13	0.322373	0.695	0.681	1.27e-08
ELF1	1.01e-16	0.321744	0.632	0.593	2.49e-12
BHLHE40	4.45e-11	0.321529	0.651	0.642	1.09e-06
CYP1B1	1.28e-22	0.321336	0.18	0.078	3.14e-18
TRA2B	3.49e-22	0.320075	0.862	0.927	8.59e-18
ADAR	3.68e-15	0.32007	0.52	0.442	9.04e-11
JDP2	2.87e-26	0.320045	0.413	0.269	7.04e-22
IGF2R	1.34e-29	0.319677	0.437	0.285	3.28e-25
AFTPH	1.87e-15	0.319408	0.566	0.506	4.6e-11
SVIL	2.11e-15	0.318419	0.67	0.638	5.18e-11
HSPH1	4.95e-23	0.318342	0.928	0.949	1.22e-18
LONRF1	3.14e-26	0.317999	0.467	0.31	7.71e-22
ARID4B	2.36e-17	0.31757	0.721	0.753	5.8e-13
CKB	3.99e-15	0.317061	0.589	0.524	9.8e-11
FBXO32	3.11e-23	0.316949	0.318	0.188	7.64e-19
FBXW7	2.59e-14	0.31687	0.735	0.726	6.38e-10
GJA1	8.11e-11	0.316258	0.753	0.77	1.99e-06
PPP4R3B	2.74e-18	0.31589	0.543	0.46	6.73e-14
CD109	2.08e-18	0.315784	0.455	0.346	5.11e-14
LRPPRC	5.92e-13	0.31554	0.575	0.533	1.46e-08
DSC2	1.35e-06	0.315051	0.731	0.755	0.0332929
COL18A1	7.26e-19	0.314986	0.517	0.417	1.78e-14
ANKRD11	1.21e-19	0.314869	0.768	0.811	2.98e-15
TP53BP2	1.22e-28	0.314545	0.415	0.269	3.01e-24
HSPA8	1.59e-28	0.312963	0.98	0.984	3.92e-24
EML4	2.22e-15	0.312697	0.61	0.579	5.45e-11
ZFC3H1	3.78e-20	0.312662	0.567	0.479	9.29e-16
MX1	6.92e-15	0.312586	0.284	0.191	1.7e-10
PRKDC	1.38e-13	0.311689	0.768	0.772	3.39e-09
ARID1B	4.21e-18	0.311654	0.639	0.563	1.03e-13
KPNA4	1.68e-18	0.311474	0.679	0.644	4.12e-14
ZNF750	4.11e-09	0.310844	0.463	0.411	0.000100941
SLC47A2	9.63e-30	0.310462	0.372	0.21	2.37e-25
GCLC	2.88e-30	0.310345	0.393	0.238	7.07e-26
SF1	7.81e-26	0.310337	0.802	0.826	1.92e-21
TCF25	6.24e-20	0.309919	0.753	0.743	1.53e-15
LDLR	3.84e-12	0.309348	0.673	0.692	9.43e-08
MIDN	1.49e-16	0.309196	0.727	0.748	3.66e-12
BOC	2.48e-32	0.309174	0.364	0.202	6.1e-28
KHDC4	1.39e-29	0.30905	0.45	0.293	3.42e-25
SPARC	1.77e-16	0.308912	0.348	0.241	4.34e-12
GCC2	2.13e-16	0.308732	0.542	0.46	5.24e-12
HES1	1.87e-22	0.308607	0.831	0.792	4.6e-18
SENP6	2.69e-19	0.308592	0.593	0.512	6.61e-15
RIF1	9.03e-14	0.307049	0.584	0.532	2.22e-09
XRN1	1.9e-23	0.306792	0.451	0.313	4.67e-19
NFAT5	1.4e-15	0.305868	0.623	0.585	3.45e-11
ZNF451	1.53e-20	0.305819	0.498	0.389	3.77e-16
TFCP2L1	9.03e-35	0.305777	0.304	0.147	2.22e-30
YES1	3.15e-13	0.305311	0.603	0.579	7.74e-09
KMT2C	4.18e-23	0.305132	0.582	0.477	1.03e-18
ENAH	4.98e-09	0.304916	0.651	0.652	0.000122386
ZFX	2.04e-16	0.304822	0.475	0.371	5.01e-12
DKK3	6.54e-19	0.304167	0.487	0.381	1.61e-14
SF3B1	4.64e-19	0.304094	0.792	0.821	1.14e-14
EHBP1	7.04e-16	0.303599	0.404	0.305	1.73e-11
RSRC2	3.82e-30	0.30331	0.887	0.926	9.4e-26
SENP5	8.06e-24	0.3027	0.433	0.301	1.98e-19
DLG1	7.07e-15	0.302363	0.499	0.412	1.74e-10
MT-ND4L	8.37e-28	0.30217	0.942	0.894	2.06e-23
CUL3	8.99e-15	0.302125	0.586	0.533	2.21e-10
SLC3A2	4.59e-19	0.301859	0.897	0.96	1.13e-14
EIF4G2	7.93e-35	0.301675	0.92	0.955	1.95e-30
WNK1	6.36e-18	0.301598	0.74	0.74	1.56e-13
PHIP	4.48e-20	0.301523	0.57	0.469	1.1e-15
ARHGEF5	7.53e-22	0.301158	0.467	0.347	1.85e-17
KMT2E	2.42e-18	0.300731	0.732	0.734	5.94e-14
PDCD4	3.96e-18	0.300337	0.729	0.683	9.74e-14
HIPK3	7.4e-20	0.300073	0.519	0.413	1.82e-15
USP34	1.05e-17	0.299737	0.574	0.5	2.59e-13
FAM13A	2.71e-19	0.299502	0.26	0.149	6.67e-15
ZMYM2	2.74e-26	0.29904	0.41	0.264	6.74e-22
ZNF431	2.98e-21	0.298937	0.349	0.229	7.32e-17
SNRK	3.84e-28	0.29843	0.489	0.333	9.43e-24
C1QTNF12	5.26e-32	0.298236	0.296	0.141	1.29e-27
CHD8	4.85e-23	0.298233	0.47	0.34	1.19e-18
MAP3K2	3.18e-19	0.298099	0.592	0.506	7.81e-15
TSPYL2	1.06e-12	0.297588	0.391	0.299	2.6e-08
ILF3	7.7e-18	0.297513	0.706	0.711	1.89e-13
BDP1	5.9e-16	0.297383	0.673	0.629	1.45e-11
NPEPPS	1.33e-15	0.296917	0.619	0.581	3.26e-11
EGFR	2.38e-17	0.296659	0.739	0.73	5.84e-13
RSRP1	7.57e-19	0.29601	0.861	0.914	1.86e-14
HUWE1	4.04e-14	0.295996	0.554	0.49	9.92e-10
NFIL3	4e-12	0.295932	0.523	0.452	9.83e-08
PARP14	3.88e-17	0.295911	0.393	0.288	9.55e-13
LFNG	1.36e-37	0.295276	0.312	0.139	3.35e-33
TUT7	3.53e-13	0.295049	0.526	0.458	8.67e-09
PMAIP1	9.65e-15	0.29403	0.875	0.916	2.37e-10
CHD6	1.17e-27	0.293659	0.438	0.289	2.88e-23
BAZ2B	3.03e-18	0.293283	0.529	0.427	7.46e-14
PNN	1.72e-20	0.293176	0.851	0.91	4.23e-16
NUFIP2	9.68e-12	0.293161	0.712	0.717	2.38e-07
ANTXR1	8.41e-22	0.292039	0.422	0.289	2.07e-17
CBX5	2.8e-13	0.291661	0.524	0.442	6.89e-09
FAM53C	6.38e-31	0.291584	0.438	0.273	1.57e-26
CHD9	3.42e-13	0.291326	0.579	0.523	8.4e-09
BRD4	2.35e-15	0.290598	0.699	0.692	5.78e-11
ZNF91	2.97e-25	0.290396	0.316	0.18	7.31e-21
INO80D	2.28e-22	0.29024	0.416	0.281	5.61e-18
SETD5	6.6e-21	0.289348	0.558	0.46	1.62e-16
ROCK2	1.42e-11	0.289308	0.535	0.488	3.49e-07
RYK	2.55e-14	0.288777	0.536	0.457	6.27e-10
KLK5	1.36e-22	0.288696	0.322	0.195	3.34e-18
ZNF644	9.69e-17	0.288526	0.559	0.484	2.38e-12
VPS13C	5.27e-19	0.288523	0.346	0.232	1.3e-14
MED13	2.74e-18	0.288277	0.524	0.432	6.73e-14
MDM4	1.97e-20	0.288145	0.414	0.289	4.85e-16
NUMA1	3.44e-18	0.287644	0.479	0.373	8.45e-14
SETX	2.84e-20	0.287484	0.446	0.321	6.98e-16
JAG2	3.32e-30	0.286739	0.428	0.267	8.16e-26
PER3	1.05e-12	0.286654	0.414	0.325	2.58e-08
BACH1	1.04e-10	0.286572	0.48	0.416	2.55e-06
KAT6B	5.31e-27	0.285714	0.45	0.299	1.31e-22
AKAP13	6.15e-12	0.28557	0.488	0.41	1.51e-07
TUT4	2.31e-14	0.285537	0.626	0.549	5.68e-10
EIF3A	2.13e-28	0.285451	0.892	0.937	5.24e-24
IQGAP1	3.55e-16	0.284733	0.783	0.823	8.72e-12
ARAP2	4.46e-14	0.284621	0.435	0.351	1.1e-09
SMARCC1	1.6e-11	0.284381	0.62	0.606	3.94e-07
JUNB	8.65e-26	0.28437	0.97	0.983	2.13e-21
KLF3	1.04e-18	0.283897	0.766	0.765	2.55e-14
GPATCH8	1.7e-15	0.283783	0.536	0.46	4.17e-11
EPM2AIP1	1.02e-26	0.283779	0.384	0.235	2.51e-22
XPC	3.3e-19	0.28298	0.468	0.348	8.12e-15
PBRM1	3.5e-11	0.282945	0.542	0.494	8.6e-07
FST	4.96e-13	0.28294	0.172	0.096	1.22e-08
KANSL1	6.01e-16	0.282724	0.552	0.47	1.48e-11
IRF6	1.91e-14	0.282466	0.721	0.76	4.69e-10
CHORDC1	7.6e-13	0.28202	0.714	0.721	1.87e-08
PCMTD1	8.57e-16	0.28189	0.507	0.408	2.11e-11
LSG1	1.53e-11	0.281852	0.451	0.381	3.77e-07
HBP1	9.42e-18	0.281328	0.599	0.512	2.32e-13
CENPC	9.2e-15	0.281155	0.447	0.345	2.26e-10
TRA2A	3.99e-15	0.280737	0.721	0.705	9.81e-11
EIF4G1	8.3e-16	0.280385	0.701	0.701	2.04e-11
PDGFA	1.59e-24	0.280301	0.303	0.168	3.9e-20
ZNF292	5.63e-10	0.279771	0.597	0.58	1.38e-05
ACTN4	3.97e-22	0.278997	0.836	0.879	9.76e-18
SMARCA2	2.03e-11	0.27837	0.51	0.434	4.99e-07
PLXDC2	2.95e-11	0.278245	0.405	0.32	7.26e-07
KIDINS220	6.68e-21	0.277745	0.461	0.344	1.64e-16
RAB3IP	1.77e-17	0.277551	0.38	0.273	4.36e-13
ZCCHC8	2.24e-20	0.277366	0.442	0.322	5.52e-16
IP6K2	1.16e-14	0.277347	0.657	0.643	2.85e-10
CDC42BPB	8.15e-18	0.277306	0.418	0.308	2e-13
SMCHD1	2.06e-14	0.276692	0.461	0.376	5.07e-10
C16orf72	9.09e-17	0.276295	0.603	0.55	2.24e-12
PPP1R15B	4.94e-24	0.276243	0.467	0.331	1.21e-19
ZNF148	3.35e-17	0.275838	0.517	0.415	8.23e-13
PIM1	1.25e-08	0.275313	0.39	0.327	0.000306415
PIK3C2A	2.08e-20	0.273784	0.45	0.339	5.12e-16
HOOK3	2.35e-12	0.273345	0.523	0.459	5.78e-08
TCEA1	6.42e-14	0.273312	0.769	0.808	1.58e-09
TSC22D2	5.37e-21	0.273228	0.44	0.314	1.32e-16
MXRA5	8.97e-22	0.272998	0.349	0.218	2.2e-17
KDM3A	5.13e-27	0.272374	0.413	0.261	1.26e-22
MYSM1	2.89e-21	0.272284	0.395	0.267	7.12e-17
CEP95	5.74e-24	0.272276	0.401	0.26	1.41e-19
AP1G1	5.19e-16	0.272266	0.412	0.31	1.28e-11
FAM83B	6.45e-09	0.271763	0.542	0.497	0.000158528
FTL	8.6e-07	0.271647	0.986	0.995	0.0211453
EPC1	9.73e-13	0.271353	0.592	0.537	2.39e-08
ASPH	1.43e-18	0.271276	0.486	0.373	3.52e-14
UBR5	4.04e-16	0.270953	0.517	0.431	9.94e-12
SRSF5	6.24e-17	0.270859	0.81	0.857	1.53e-12
AC136616.1	1.33e-07	0.270852	0.199	0.142	0.00325852
VPS4B	1.64e-08	0.270619	0.668	0.675	0.000403475
VPS13D	1.8e-15	0.270505	0.39	0.287	4.41e-11
FOXO3	3.19e-20	0.270123	0.48	0.362	7.84e-16
TP53	2.28e-19	0.26911	0.316	0.198	5.61e-15
ITGB8	1.51e-30	0.268554	0.32	0.167	3.71e-26
PTN	2.44e-19	0.268191	0.141	0.057	5.99e-15
ZNF430	3.33e-16	0.268111	0.458	0.36	8.18e-12
SNRNP200	5.01e-11	0.267954	0.534	0.489	1.23e-06
PTGS2	2.08e-18	0.26792	0.218	0.115	5.11e-14
THBS2	3.41e-07	0.267829	0.403	0.348	0.00838524
CDH1	4.93e-10	0.267765	0.573	0.534	1.21e-05
LTBP4	8.49e-17	0.267671	0.456	0.357	2.09e-12
ZMYM5	2.64e-18	0.267516	0.411	0.29	6.49e-14
POLR2J3.1	2.19e-11	0.267455	0.456	0.384	5.38e-07
RANBP2	4.78e-10	0.267006	0.502	0.447	1.18e-05
PTPN14	6.52e-20	0.266686	0.394	0.269	1.6e-15
CLTC	1.91e-07	0.266451	0.552	0.53	0.00468972
ACAP2	9.46e-09	0.266299	0.473	0.418	0.000232636
MYO5A	1.34e-23	0.266262	0.404	0.268	3.29e-19
ZBTB20	2.09e-33	0.265938	0.347	0.178	5.14e-29
CEP290	1.65e-15	0.265834	0.325	0.218	4.06e-11
LUC7L3	2.85e-14	0.265247	0.787	0.833	7.02e-10
GPATCH2L	6.81e-18	0.264972	0.436	0.331	1.67e-13
OPA1	5.66e-17	0.26436	0.406	0.297	1.39e-12
CWC25	8.15e-15	0.263904	0.655	0.641	2e-10
TNS4	2.55e-10	0.263886	0.567	0.534	6.27e-06
UTRN	2.87e-15	0.263801	0.361	0.258	7.06e-11
PSME4	1.15e-17	0.263393	0.511	0.417	2.82e-13
CRYBG3	8.37e-16	0.26323	0.377	0.276	2.06e-11
PRPF4B	6.01e-14	0.263199	0.794	0.84	1.48e-09
NCKAP1	9.53e-12	0.263065	0.556	0.506	2.34e-07
GOLIM4	1.16e-10	0.262854	0.429	0.359	2.85e-06
XAF1	1.18e-08	0.26283	0.341	0.279	0.000290655
TKT	2.55e-17	0.26251	0.851	0.887	6.28e-13
NAB1	7.44e-16	0.262488	0.472	0.38	1.83e-11
PRNP	3.92e-13	0.262459	0.805	0.872	9.63e-09
EPHA4	2.9e-17	0.262127	0.277	0.173	7.13e-13
RBBP8	6.6e-10	0.261832	0.499	0.438	1.62e-05
OSR2	4.93e-62	0.261742	0.224	0.043	1.21e-57
SUN1	5.22e-15	0.261374	0.559	0.473	1.28e-10
GAN	1.3e-13	0.261011	0.415	0.321	3.19e-09
TENM2	1.05e-15	0.260838	0.444	0.347	2.58e-11
TAF15	3.66e-10	0.260735	0.643	0.623	8.99e-06
HSPA5	1.7e-16	0.260454	0.862	0.88	4.19e-12
PUM1	3.86e-12	0.260234	0.662	0.647	9.49e-08
PTMS	2.11e-13	0.260122	0.869	0.946	5.19e-09
FAT2	1.14e-19	0.259786	0.432	0.313	2.79e-15
SEMA3C	6.12e-33	0.259549	0.242	0.1	1.51e-28
TM9SF3	5.24e-11	0.259509	0.683	0.672	1.29e-06
PDCD6IP	2.93e-09	0.258927	0.547	0.512	7.21e-05
PDZD8	1.51e-10	0.258912	0.392	0.315	3.7e-06
FGFR2	7.92e-15	0.258817	0.503	0.405	1.95e-10
HIST2H2AC	8.01e-09	0.258811	0.41	0.346	0.000196841
PCYOX1	8.52e-10	0.258744	0.494	0.431	2.09e-05
MT-CYB	8.67e-54	0.258577	0.996	0.995	2.13e-49
IVNS1ABP	7.92e-12	0.258491	0.683	0.647	1.95e-07
DHX9	1.31e-09	0.258242	0.644	0.626	3.21e-05
FYTTD1	2.26e-07	0.257372	0.598	0.586	0.00555376
HTRA1	1.18e-13	0.257353	0.472	0.385	2.91e-09
KDM5A	1.35e-12	0.257074	0.581	0.526	3.32e-08
DICER1	8.55e-11	0.256895	0.472	0.403	2.1e-06
KLHL24	2.43e-26	0.256727	0.404	0.252	5.98e-22
TIMP3	1.36e-28	0.256702	0.213	0.088	3.35e-24
WDR47	1.01e-11	0.256678	0.476	0.399	2.47e-07
OGA	3.25e-10	0.256124	0.479	0.414	7.98e-06
ARFGEF1	1.63e-15	0.25607	0.439	0.34	4.02e-11
POLR2A	4.38e-10	0.255354	0.618	0.594	1.08e-05
CAPN7	1.86e-17	0.255258	0.362	0.25	4.58e-13
ZNF791	5.52e-21	0.254927	0.425	0.298	1.36e-16
UBTF	1.02e-06	0.254684	0.567	0.551	0.0251186
TOPORS	8.41e-13	0.254576	0.571	0.503	2.07e-08
KIAA1551	4.03e-10	0.254453	0.506	0.446	9.89e-06
LINC00511	1.19e-16	0.254365	0.421	0.318	2.94e-12
CAPRIN1	5.98e-07	0.254302	0.61	0.602	0.0147072
MAP3K1	5.84e-12	0.254216	0.415	0.327	1.44e-07
CYLD	2.88e-11	0.254017	0.633	0.584	7.09e-07
MT-ND4	2.15e-46	0.253361	0.995	0.993	5.29e-42
CREBBP	1.82e-19	0.253329	0.493	0.382	4.48e-15
ZC3HAV1	1.6e-14	0.252677	0.416	0.317	3.94e-10
NSD3	5.05e-07	0.252515	0.634	0.653	0.0124173
RNF19A	3.67e-12	0.252304	0.592	0.516	9.01e-08
2021-09-02	4.52e-09	0.252035	0.635	0.633	0.000111
TBL1XR1	1.25e-07	0.251884	0.521	0.481	0.00308089
USP22	1.25e-12	0.251713	0.486	0.415	3.08e-08
LCORL	1.16e-19	0.251429	0.353	0.231	2.85e-15
SUCO	1.3e-16	0.251319	0.463	0.357	3.2e-12
GLG1	5.54e-12	0.251312	0.485	0.411	1.36e-07
CYBA	4.62e-15	0.251267	0.384	0.281	1.14e-10
PPP4R3A	2.01e-14	0.251173	0.554	0.478	4.95e-10
ANKRD29	9.45e-20	0.2509	0.341	0.226	2.32e-15
ZHX1	6.05e-08	0.250341	0.504	0.471	0.00148736
SUZ12	5.23e-07	0.25016	0.534	0.505	0.0128457

## Sheet: Supplementary file 1c
Supplementary file 1c The gene list of up-regulated DEGs in AK Basal2 subpopulation.
	p_val	avg_log2FC	pct.1	pct.2	p_val_adj
CST6	1.91e-38	2.04023	0.436	0.136	4.69e-34
MTRNR2L12	2.81e-71	1.94196	0.524	0.096	6.9e-67
KRT15	1.54e-48	1.55997	0.589	0.233	3.78e-44
EGR1	6.83e-64	1.45856	0.933	0.831	1.68e-59
CALML5	6.52e-76	1.34865	0.989	0.959	1.6e-71
KRT1	3.22e-81	1.34357	1	0.992	7.92e-77
LRRC75A	2.51e-37	1.34211	0.516	0.228	6.18e-33
DSG1	4.94e-88	1.33068	0.993	0.994	1.21e-83
DSC1	9.85e-56	1.3268	0.853	0.571	2.42e-51
DSP	8.37e-99	1.22733	0.996	0.999	2.06e-94
TXNIP	3.19e-36	1.14562	0.787	0.575	7.85e-32
BTG2	2.74e-69	1.13238	0.893	0.843	6.73e-65
ATF3	2.04e-61	1.12247	0.933	0.89	5.01e-57
DSC3	6.29e-81	1.07846	0.987	0.997	1.55e-76
KRT10	4.82e-74	1.04373	1	1	1.19e-69
EGR3	4.5e-57	0.990477	0.76	0.495	1.11e-52
FOSB	3.73e-57	0.978331	0.893	0.89	9.18e-53
MT-ND1	4.14e-113	0.945808	1	0.997	1.02e-108
IGFL1	2.25e-25	0.939614	0.529	0.284	5.53e-21
TYRP1	1.99e-26	0.934644	0.267	0.063	4.89e-22
RHOB	1.01e-25	0.921007	0.842	0.74	2.48e-21
RND3	8.11e-56	0.916148	0.896	0.931	1.99e-51
NFKBIZ	2.37e-35	0.896697	0.802	0.867	5.82e-31
IFFO2	1.06e-29	0.87568	0.718	0.676	2.59e-25
FOS	1.95e-20	0.868284	0.982	0.983	4.8e-16
MT-ND2	1.96e-100	0.855392	0.993	0.997	4.83e-96
NCOA7	3.66e-33	0.852972	0.818	0.812	9.01e-29
LGALSL	3.93e-22	0.850607	0.767	0.852	9.66e-18
KRT9	1.91e-27	0.849458	0.207	0.031	4.69e-23
TNFAIP3	2.8e-19	0.844872	0.802	0.888	6.89e-15
MTRNR2L8	9.02e-39	0.84483	0.322	0.06	2.22e-34
KRTDAP	5.97e-51	0.819869	1	1	1.47e-46
MT-ND4L	8.02e-39	0.801056	0.942	0.963	1.97e-34
HNRNPH1	3.89e-35	0.771862	0.844	0.837	9.56e-31
MAP3K8	1.26e-18	0.756121	0.7	0.792	3.1e-14
OVOL1	3.21e-33	0.733985	0.82	0.881	7.9e-29
EPHB6	8e-32	0.718423	0.807	0.684	1.97e-27
TOB1	1.43e-28	0.691087	0.789	0.687	3.51e-24
XIST	6.48e-19	0.682801	0.78	0.872	1.59e-14
CSTA	1.09e-30	0.680952	0.973	0.961	2.67e-26
SYNE2	3.28e-18	0.678926	0.753	0.76	8.06e-14
NR4A1	1.74e-24	0.67229	0.822	0.775	4.28e-20
HIST1H1E	1.53e-29	0.669919	0.547	0.315	3.76e-25
ZNF750	1.1e-30	0.646646	0.8	0.878	2.71e-26
WEE1	7.2e-36	0.645402	0.647	0.399	1.77e-31
C1orf56	1.99e-15	0.642649	0.309	0.148	4.9e-11
RBP1	1.18e-19	0.640818	0.789	0.735	2.9e-15
GJA1	2.46e-36	0.638024	0.92	0.954	6.04e-32
KLF6	1.85e-34	0.636076	0.956	0.982	4.55e-30
AHNAK2	5.47e-25	0.632642	0.829	0.805	1.34e-20
NEFM	5.79e-47	0.619455	0.322	0.042	1.42e-42
PMEL	3.59e-14	0.617581	0.322	0.157	8.82e-10
MT-ND3	1.31e-55	0.617504	1	0.998	3.23e-51
CCNL1	4.21e-34	0.616694	0.876	0.968	1.04e-29
SPRR1B	1.62e-09	0.612283	0.909	0.828	3.98e-05
ALDH3A2	2.2e-19	0.611458	0.831	0.826	5.42e-15
CIRBP	5.25e-40	0.60731	0.849	0.922	1.29e-35
GPX4	2.99e-22	0.605781	0.864	0.865	7.36e-18
YWHAZ	7.25e-45	0.604903	0.978	0.998	1.78e-40
CTNNB1	9.34e-23	0.602935	0.744	0.659	2.3e-18
MT-CO3	3.44e-60	0.6023	1	1	8.46e-56
RAP2B	9.13e-25	0.60068	0.796	0.861	2.24e-20
TOP2B	1.35e-24	0.588223	0.68	0.557	3.31e-20
CLCA2	2.38e-15	0.583775	0.896	0.911	5.84e-11
SLC38A2	3.87e-36	0.582319	0.891	0.968	9.52e-32
MYCBP2	1.77e-28	0.577197	0.831	0.897	4.35e-24
NORAD	1.88e-18	0.569441	0.758	0.778	4.62e-14
DENND2C	2.11e-16	0.569148	0.733	0.881	5.19e-12
SPRR2D	1.24e-07	0.568595	0.704	0.712	0.00304864
DYNLT3	7.39e-10	0.567176	0.52	0.413	1.82e-05
EPPK1	9.79e-20	0.565389	0.6	0.419	2.41e-15
MGST1	6.99e-22	0.565023	0.576	0.333	1.72e-17
FAM83B	8.05e-14	0.562524	0.704	0.733	1.98e-09
MT-ND6	2.45e-09	0.56109	0.613	0.506	6.02e-05
CSDE1	3.39e-31	0.560424	0.856	0.952	8.33e-27
UBR4	2.85e-08	0.558141	0.731	0.746	0.000699684
DDX3X	8.76e-25	0.557852	0.9	0.984	2.15e-20
ITPKC	6.09e-14	0.555799	0.676	0.691	1.5e-09
PKP1	6.19e-41	0.55104	0.936	0.993	1.52e-36
PTPRZ1	7.12e-10	0.54876	0.624	0.589	1.75e-05
CNFN	1.66e-08	0.546141	0.44	0.314	0.000407223
IRS2	3.26e-20	0.543006	0.604	0.505	8.03e-16
PPP1CB	1.58e-20	0.53917	0.8	0.89	3.89e-16
SMG1	7.81e-18	0.538563	0.713	0.718	1.92e-13
MAP4	3.49e-16	0.532549	0.776	0.836	8.58e-12
ALDH3A1	2.93e-18	0.532129	0.513	0.317	7.19e-14
DUSP1	2.11e-12	0.530024	0.984	0.99	5.18e-08
ELL2	3.05e-15	0.529523	0.711	0.683	7.49e-11
PALMD	5.38e-17	0.528884	0.793	0.846	1.32e-12
FTH1	2.58e-14	0.527814	0.838	0.81	6.35e-10
HP1BP3	1.05e-12	0.52717	0.784	0.845	2.59e-08
RBM3	9.45e-42	0.522308	0.936	0.988	2.32e-37
GOLGB1	5.37e-14	0.52015	0.791	0.882	1.32e-09
RORA	1.67e-22	0.518227	0.849	0.864	4.11e-18
AC020916.1	5.59e-10	0.515064	0.518	0.395	1.37e-05
SLURP1	8.03e-14	0.514136	0.22	0.083	1.97e-09
HNRNPU	7.56e-23	0.506401	0.922	0.977	1.86e-18
KLK7	2.93e-07	0.501659	0.436	0.317	0.00719091
AHNAK	3.28e-33	0.501301	0.969	0.994	8.07e-29
WNT4	2.12e-25	0.499317	0.544	0.291	5.21e-21
PCM1	1.65e-10	0.498721	0.651	0.64	4.05e-06
DST	4.94e-09	0.495751	0.464	0.317	0.000121325
NFIB	1.83e-06	0.49395	0.453	0.368	0.0450843
ETS2	9.79e-18	0.492174	0.844	0.949	2.41e-13
SCEL	9.98e-07	0.491873	0.424	0.326	0.0245377
GPNMB	1.43e-18	0.491037	0.829	0.869	3.52e-14
FLG	4.72e-10	0.489862	0.238	0.112	1.16e-05
GTF2I	3.14e-18	0.486106	0.798	0.894	7.71e-14
DYNC1H1	2.35e-15	0.485265	0.776	0.878	5.77e-11
IER2	2.68e-17	0.484505	0.982	0.997	6.59e-13
N4BP2L2	2.66e-10	0.479941	0.716	0.72	6.53e-06
ENAH	3.1e-08	0.47807	0.776	0.875	0.00076259
MT-ATP6	1.88e-19	0.477722	0.996	0.998	4.63e-15
EGR2	4.75e-22	0.477484	0.42	0.196	1.17e-17
NFIX	3.59e-12	0.470707	0.636	0.574	8.83e-08
DDX6	2.25e-09	0.469955	0.693	0.673	5.54e-05
CDC42EP4	1.88e-13	0.468675	0.62	0.583	4.63e-09
ELF3	3.13e-09	0.460132	0.52	0.412	7.71e-05
MACF1	1.04e-13	0.457748	0.816	0.915	2.56e-09
WNK1	1.46e-14	0.454755	0.764	0.831	3.58e-10
PDCD4	1.3e-08	0.454039	0.713	0.709	0.000319181
CLDN1	5.23e-10	0.451622	0.782	0.79	1.29e-05
EIF4A2	1.24e-16	0.450309	0.804	0.918	3.05e-12
MT-CO2	1.71e-49	0.45004	1	0.998	4.2e-45
KLF4	1.38e-14	0.448654	0.8	0.923	3.4e-10
IGFBP2	1.75e-11	0.447419	0.358	0.215	4.31e-07
DCT	4.47e-10	0.446153	0.153	0.054	1.1e-05
CANX	3.34e-14	0.443032	0.811	0.895	8.21e-10
C6orf62	1.01e-11	0.439873	0.649	0.617	2.48e-07
ADRB2	2.37e-11	0.438159	0.556	0.417	5.83e-07
NRIP1	2.68e-10	0.436114	0.464	0.358	6.59e-06
ADNP	5.22e-17	0.435093	0.567	0.386	1.28e-12
MT-ND5	1.3e-34	0.433175	0.991	0.998	3.2e-30
C19orf33	2.1e-13	0.432543	0.796	0.886	5.17e-09
RNF19A	9.81e-09	0.431603	0.751	0.783	0.000241052
TPPP3	2.55e-12	0.431404	0.571	0.399	6.28e-08
GRHL1	2.33e-11	0.430826	0.724	0.76	5.73e-07
PLXDC2	6.93e-07	0.430161	0.629	0.589	0.0170245
ZHX1	2.09e-07	0.430107	0.671	0.692	0.00512744
LRPPRC	7.5e-10	0.429094	0.696	0.715	1.84e-05
EIF4G2	2.31e-30	0.429034	0.927	0.999	5.69e-26
JUN	1e-15	0.427945	0.987	1	2.46e-11
PELI1	4.29e-15	0.425169	0.631	0.556	1.05e-10
ANKRD12	4.25e-14	0.424819	0.782	0.898	1.04e-09
CEP350	3.47e-09	0.42231	0.649	0.623	8.52e-05
VMP1	3.97e-09	0.417722	0.718	0.851	9.77e-05
TNRC6B	2.93e-07	0.417714	0.622	0.601	0.00719904
TUFT1	7e-17	0.415087	0.547	0.381	1.72e-12
GAN	5.06e-09	0.413425	0.573	0.478	0.000124506
MDM4	2.23e-11	0.41132	0.482	0.336	5.49e-07
KLF3	4.24e-15	0.410189	0.804	0.896	1.04e-10
MAL2	8.24e-16	0.408581	0.849	0.967	2.03e-11
SETD2	2.02e-11	0.402525	0.584	0.521	4.96e-07
TRA2A	1.9e-07	0.401668	0.716	0.746	0.00466479
SERPINB5	2.47e-19	0.398974	0.927	0.992	6.07e-15
MT-CYB	1.63e-33	0.398916	1	0.998	4.01e-29
LAMP1	3.26e-13	0.398589	0.798	0.932	8e-09
ASH1L	4.08e-09	0.394974	0.68	0.708	0.000100207
EXPH5	1.31e-09	0.394005	0.613	0.541	3.21e-05
TPR	4.42e-11	0.392575	0.802	0.921	1.09e-06
FKBP5	1.44e-15	0.391458	0.487	0.323	3.55e-11
IGFL2-AS1	1.53e-23	0.390139	0.247	0.061	3.75e-19
KRT23	2.55e-17	0.387975	0.349	0.16	6.28e-13
JUND	2.92e-17	0.386886	0.916	0.99	7.18e-13
PDLIM4	6.14e-18	0.386101	0.438	0.239	1.51e-13
HNRNPA3	7.36e-21	0.386022	0.911	0.989	1.81e-16
HADHA	4.39e-10	0.385528	0.767	0.892	1.08e-05
ZFX	7.11e-11	0.385252	0.547	0.417	1.75e-06
TM4SF1	3e-09	0.385138	0.344	0.217	7.38e-05
BROX	6.36e-07	0.384305	0.58	0.54	0.015638
ARL5B	3.91e-08	0.383426	0.667	0.683	0.000961469
ARHGAP5	6.37e-09	0.382839	0.647	0.631	0.000156505
SF3B1	2.09e-09	0.380777	0.767	0.904	5.13e-05
PLS3	2.08e-09	0.380743	0.729	0.837	5.12e-05
KMT5A	1.12e-06	0.378604	0.68	0.717	0.0274733
OGFRL1	1.91e-09	0.37856	0.553	0.476	4.7e-05
ARGLU1	7.8e-10	0.378467	0.764	0.87	1.92e-05
EIF5	3.63e-17	0.378377	0.882	0.98	8.93e-13
EZR	1.62e-21	0.374322	0.947	0.994	3.98e-17
NAA50	8.85e-09	0.373117	0.753	0.865	0.000217607
TRPS1	7.32e-19	0.372627	0.496	0.298	1.8e-14
GTF3C1	4.1e-11	0.371856	0.54	0.424	1.01e-06
APOBEC3A	1.21e-07	0.371669	0.642	0.547	0.00297655
SMARCC1	1.53e-08	0.370547	0.676	0.758	0.000375482
MIA3	5.95e-07	0.370334	0.533	0.46	0.0146272
PABPC1	7.14e-22	0.370315	0.964	0.999	1.75e-17
TRA2B	4.41e-14	0.370312	0.827	0.939	1.08e-09
PRKDC	7.38e-09	0.369675	0.773	0.882	0.00018136
SOSTDC1	1.39e-19	0.368837	0.293	0.104	3.41e-15
FAT2	1.12e-11	0.36755	0.482	0.336	2.76e-07
CCDC47	1.58e-07	0.366316	0.762	0.909	0.00388817
URI1	3.48e-09	0.36499	0.82	0.923	8.56e-05
CDKN2A	1.17e-06	0.361931	0.398	0.301	0.0286688
EFNB2	1.69e-08	0.360208	0.5	0.411	0.000415169
CTNNBIP1	8.11e-08	0.360132	0.867	0.956	0.00199421
CYLD	4.59e-07	0.357014	0.698	0.743	0.0112852
ANKLE2	1.12e-08	0.356111	0.653	0.716	0.000274831
CD2AP	1.73e-06	0.355912	0.616	0.616	0.0424531
PIK3R1	2.51e-08	0.355819	0.4	0.276	0.000616077
HSPB8	1.99e-08	0.355694	0.451	0.326	0.000488589
SPPL3	1.17e-09	0.35548	0.691	0.77	2.89e-05
AZIN1	3.29e-08	0.354704	0.651	0.635	0.000808716
TCEA1	2.05e-09	0.352176	0.782	0.926	5.05e-05
ACTN4	1.14e-14	0.349101	0.82	0.945	2.81e-10
NFIC	8.51e-07	0.347724	0.738	0.854	0.0209269
KPNA4	1.11e-07	0.346041	0.707	0.789	0.00272969
PRNP	3.94e-08	0.345288	0.751	0.934	0.000969102
PTN	2.67e-17	0.344903	0.173	0.04	6.56e-13
CHD4	5.89e-07	0.344552	0.687	0.779	0.0144847
NCKAP1	4.2e-08	0.344343	0.678	0.713	0.00103321
DDX39B	9.86e-14	0.34359	0.482	0.306	2.42e-09
PTGER4	3.38e-14	0.343542	0.396	0.217	8.31e-10
ARID1B	2.63e-07	0.34096	0.673	0.711	0.00645459
MXD1	5.24e-10	0.340616	0.664	0.635	1.29e-05
FUS	2.58e-14	0.338901	0.849	0.972	6.35e-10
KLK5	7.36e-09	0.336023	0.393	0.268	0.000180824
APC	1.26e-06	0.335702	0.496	0.398	0.030856
KLF13	3.18e-07	0.334012	0.698	0.747	0.00782922
ELF1	1.6e-06	0.333549	0.662	0.733	0.0393453
KMT2C	1.25e-06	0.332895	0.624	0.627	0.0307291
EP300	1.26e-11	0.331592	0.589	0.476	3.1e-07
MT-ND4	1.32e-21	0.331349	0.993	0.997	3.24e-17
DSG3	3.7e-08	0.329325	0.8	0.978	0.00090894
ATF7IP	1.5e-10	0.32916	0.442	0.299	3.68e-06
KLF5	5.49e-14	0.327237	0.856	0.971	1.35e-09
DDX5	6.14e-17	0.325187	0.958	0.995	1.51e-12
BCLAF1	9.34e-07	0.324224	0.742	0.905	0.0229672
JUP	3.52e-19	0.323377	0.951	0.998	8.66e-15
ARHGEF12	1.96e-07	0.32331	0.596	0.57	0.00481135
BCL11B	1.2e-08	0.322675	0.578	0.503	0.000294249
ZFP36	3.64e-07	0.322315	0.931	0.985	0.0089575
SET	2.63e-12	0.320454	0.949	0.997	6.48e-08
PDZD8	4.69e-08	0.318489	0.509	0.4	0.00115194
KAT6A	8.16e-08	0.315526	0.542	0.439	0.00200654
EPHB3	8.75e-08	0.314228	0.544	0.536	0.00215199
SMC5	5.43e-08	0.31317	0.536	0.418	0.00133547
MT-CO1	7.44e-26	0.31284	1	0.998	1.83e-21
PSME4	2.27e-09	0.31268	0.52	0.426	5.57e-05
HSP90AB1	1.77e-21	0.311859	0.996	1	4.36e-17
SETD5	5.09e-08	0.310804	0.584	0.548	0.00125143
IGF2R	2.14e-12	0.310723	0.516	0.364	5.25e-08
EIF4G1	1.74e-12	0.309301	0.78	0.917	4.28e-08
RIOK3	4.09e-09	0.30864	0.78	0.935	0.000100519
GBP6	1.67e-25	0.30839	0.291	0.08	4.09e-21
BRD1	9.9e-07	0.306132	0.52	0.439	0.0243426
KLF9	1.05e-13	0.304166	0.389	0.211	2.58e-09
ZFAND5	7e-07	0.303808	0.751	0.815	0.0171963
FEM1C	4.32e-10	0.303686	0.464	0.317	1.06e-05
HNRNPA2B1	2.23e-08	0.303498	0.947	0.994	0.000548166
SFPQ	6.06e-10	0.30241	0.878	0.985	1.49e-05
CLSTN1	4.59e-07	0.300346	0.48	0.375	0.0112888
CAST	2.77e-13	0.299647	0.911	0.991	6.81e-09
RASGEF1B	3.16e-08	0.298366	0.4	0.273	0.000775877
CPEB2	2.63e-08	0.297198	0.493	0.387	0.00064692
ABLIM1	1.1e-07	0.296846	0.731	0.854	0.00270995
CYP1B1	1.93e-14	0.296491	0.209	0.07	4.74e-10
EDN1	1.33e-07	0.295999	0.224	0.117	0.00328046
CDC42	2.03e-12	0.295771	0.922	0.991	4.98e-08
NAB1	1.77e-07	0.295141	0.524	0.439	0.00434519
TSPAN14	2.42e-07	0.294058	0.564	0.527	0.00594652
OGA	1.99e-06	0.293568	0.573	0.508	0.0490112
LONRF1	8.49e-08	0.293484	0.493	0.361	0.00208579
IGFL2	8.9e-16	0.29341	0.231	0.078	2.19e-11
SRSF5	8.54e-11	0.29328	0.8	0.913	2.1e-06
NUAK1	3.7e-12	0.292726	0.373	0.213	9.09e-08
CHD6	2.77e-12	0.289495	0.447	0.285	6.82e-08
YWHAE	1.37e-10	0.288249	0.927	0.994	3.37e-06
NEBL	4.09e-07	0.287816	0.496	0.408	0.010059
HSPA9	7.28e-07	0.287281	0.807	0.923	0.0179054
SPAG9	6.08e-07	0.286616	0.744	0.896	0.014952
DEGS1	8.45e-14	0.286583	0.924	0.968	2.08e-09
EEF2	1.7e-18	0.286456	0.956	0.998	4.17e-14
ZFP36L1	3.32e-14	0.285712	0.953	0.975	8.17e-10
KHDC4	9.18e-10	0.285456	0.502	0.36	2.26e-05
ZNF791	7.34e-09	0.283328	0.5	0.37	0.000180506
KIDINS220	7.94e-08	0.281363	0.504	0.396	0.00195173
SF1	7.89e-07	0.280621	0.762	0.892	0.0193919
SRRM2	1.47e-09	0.279368	0.84	0.967	3.62e-05
PAQR7	1e-07	0.278652	0.196	0.1	0.00246157
CHD8	1e-06	0.275941	0.522	0.429	0.0246465
BEX2	3.19e-07	0.275688	0.409	0.297	0.00783703
KRT79	3.5e-20	0.274645	0.142	0.017	8.61e-16
RC3H1	5.11e-08	0.273239	0.471	0.362	0.00125578
PHKG1	4.11e-07	0.273115	0.129	0.054	0.0100932
APCDD1	2.55e-07	0.271757	0.391	0.274	0.006267
SON	1.03e-10	0.270712	0.849	0.973	2.52e-06
HLA-E	4.1e-10	0.267829	0.913	0.992	1.01e-05
ZNF91	3.24e-12	0.267045	0.364	0.197	7.96e-08
MCC	5.43e-08	0.266381	0.42	0.298	0.00133366
SP3	2.21e-08	0.265413	0.467	0.33	0.000542757
ELMSAN1	1.52e-08	0.264695	0.471	0.341	0.000373992
TRIM29	3.64e-14	0.264366	0.882	0.998	8.95e-10
SLC7A8	1.22e-12	0.262913	0.318	0.161	3.01e-08
SEMA3C	9.08e-21	0.262441	0.282	0.091	2.23e-16
CREBRF	6.85e-07	0.261509	0.498	0.417	0.016835
KIAA0232	8.41e-10	0.257602	0.371	0.222	2.07e-05
SLC47A2	7.79e-16	0.256787	0.253	0.092	1.91e-11
SYT8	1.07e-13	0.256294	0.256	0.104	2.62e-09
SQSTM1	6.81e-10	0.254497	0.776	0.892	1.67e-05
PPIP5K2	1.39e-06	0.253603	0.402	0.283	0.0342237
MKL2	4.31e-10	0.252767	0.382	0.227	1.06e-05
KRT31	8.08e-08	0.252649	0.258	0.152	0.00198667
GOLGA4	1.71e-06	0.252287	0.862	0.978	0.042112
FBXO32	2.94e-07	0.251522	0.198	0.103	0.00721582
BARD1	1.29e-08	0.251231	0.429	0.307	0.000317424

## Sheet: Supplementary file 1d
Supplementary file 1d The gene list of up-regulated DEGs in AK Pro KC subpopulation.
	p_val	avg_log2FC	pct.1	pct.2	p_val_adj
MTRNR2L12	0	1.79986	0.59	0.156	0
LRRC75A	5.91e-268	1.5457	0.571	0.233	1.45e-263
CST6	5.33e-126	1.415	0.289	0.081	1.31e-121
EGR1	0	1.32464	0.926	0.805	0
TYRP1	7.5e-130	1.29334	0.261	0.057	1.84e-125
DSP	0	1.18366	0.996	0.979	0
DSG1	0	1.17779	0.932	0.845	0
BTG2	0	1.13267	0.9	0.848	0
DSC3	0	1.08422	0.981	0.963	0
HIST1H1E	6.06e-91	1.03428	0.604	0.488	1.49e-86
RND3	0	0.980475	0.901	0.884	0
CALML5	3.74e-166	0.973361	0.791	0.647	9.2e-162
KRT10	5.61e-256	0.953261	1	0.994	1.38e-251
MT-ND6	3.68e-172	0.952673	0.737	0.608	9.04e-168
KRTDAP	2.53e-198	0.94126	0.976	0.953	6.22e-194
SPINK5	7.27e-97	0.916414	0.803	0.748	1.79e-92
ATF3	6.24e-233	0.899576	0.917	0.851	1.53e-228
ALDH3A1	1.41e-142	0.865423	0.629	0.47	3.48e-138
KRT1	2.14e-209	0.846854	0.991	0.914	5.26e-205
AHNAK	8.83e-275	0.819693	0.908	0.916	2.17e-270
FOS	3.18e-151	0.816486	0.973	0.961	7.82e-147
MTRNR2L8	3.39e-119	0.795542	0.32	0.109	8.33e-115
PMEL	2.89e-60	0.786545	0.226	0.096	7.1e-56
HNRNPH1	2.91e-151	0.766956	0.818	0.802	7.15e-147
FOSB	1.46e-197	0.757061	0.862	0.853	3.59e-193
SERPINB5	9.56e-180	0.740753	0.855	0.893	2.35e-175
SYNE2	4.08e-179	0.737814	0.853	0.887	1e-174
SERPINB2	3.42e-31	0.72508	0.495	0.43	8.4e-27
OVOL1	3.36e-124	0.709602	0.735	0.707	8.25e-120
CTNNB1	8.89e-76	0.689504	0.64	0.561	2.19e-71
DCT	1.39e-67	0.687489	0.182	0.054	3.42e-63
TXNIP	7.89e-50	0.661372	0.684	0.631	1.94e-45
EGR3	2.67e-114	0.651303	0.603	0.454	6.55e-110
GJA1	8.43e-65	0.648976	0.725	0.728	2.07e-60
HNRNPU	5.25e-200	0.648645	0.923	0.956	1.29e-195
NR4A1	2.27e-138	0.646675	0.847	0.838	5.57e-134
C1orf56	1.4e-57	0.640865	0.263	0.135	3.45e-53
XIST	9.28e-129	0.639361	0.789	0.818	2.28e-124
MT-ND4L	5.75e-116	0.637396	0.946	0.945	1.41e-111
NFKBIZ	1.46e-79	0.632631	0.71	0.772	3.59e-75
EPHB6	3.62e-97	0.632462	0.7	0.63	8.9e-93
PTPRZ1	6.28e-81	0.631899	0.576	0.482	1.54e-76
CSTA	6.4e-62	0.623892	0.763	0.816	1.57e-57
KRT15	5.94e-82	0.619672	0.658	0.462	1.46e-77
MT-ND1	0	0.618005	0.998	0.986	0
NCOA7	2.63e-110	0.617974	0.868	0.9	6.46e-106
EZR	1.32e-182	0.617959	0.899	0.917	3.25e-178
ALDH3A2	7.13e-113	0.617254	0.796	0.812	1.75e-108
GOLGB1	2.08e-107	0.614165	0.768	0.787	5.11e-103
KLF6	1.15e-166	0.611892	0.914	0.917	2.82e-162
RNF19A	2.62e-83	0.609658	0.669	0.629	6.43e-79
DENND2C	2.45e-53	0.609445	0.595	0.618	6.02e-49
AHNAK2	4.92e-62	0.584884	0.684	0.629	1.21e-57
ZNF750	5.95e-86	0.582913	0.696	0.681	1.46e-81
HIST1H1D	2.07e-12	0.578307	0.487	0.476	5.09e-08
WEE1	1.1e-68	0.575021	0.668	0.656	2.71e-64
ETS2	5.92e-70	0.568891	0.764	0.822	1.46e-65
RHOB	2.73e-45	0.561767	0.729	0.741	6.71e-41
TNFAIP3	1.98e-64	0.559198	0.764	0.821	4.86e-60
APOE	3.02e-123	0.554298	0.955	0.875	7.43e-119
CCNL1	1.37e-150	0.551326	0.895	0.92	3.36e-146
KRT23	2.24e-104	0.551149	0.374	0.17	5.51e-100
DDX3X	2.28e-102	0.548939	0.848	0.895	5.6e-98
CDC42EP4	1.08e-56	0.545076	0.592	0.591	2.66e-52
NORAD	1.07e-59	0.543034	0.665	0.665	2.62e-55
EGR2	1.9e-80	0.541658	0.537	0.383	4.67e-76
RAP2B	2.67e-61	0.539182	0.681	0.714	6.57e-57
ITPKC	1.46e-69	0.538542	0.562	0.472	3.6e-65
VIM	1.43e-47	0.530672	0.401	0.282	3.52e-43
NEAT1	7.96e-167	0.527708	0.984	0.969	1.96e-162
CLCA2	4.29e-46	0.521456	0.753	0.773	1.05e-41
DDX6	2.32e-43	0.511629	0.617	0.605	5.69e-39
ZFAND5	1.58e-61	0.511605	0.708	0.746	3.87e-57
PPP1R15A	4.38e-136	0.509846	0.967	0.964	1.08e-131
MACF1	2.45e-50	0.504259	0.704	0.756	6.02e-46
SBSN	9.18e-58	0.502062	0.879	0.855	2.26e-53
CDH1	6.03e-40	0.500934	0.598	0.614	1.48e-35
NFIX	8.2e-53	0.499233	0.662	0.668	2.02e-48
MAP4	1.15e-44	0.496777	0.683	0.733	2.82e-40
DSC2	2.51e-33	0.49623	0.679	0.728	6.17e-29
TOB1	2.46e-36	0.495619	0.631	0.632	6.05e-32
SLC38A2	1.93e-114	0.491842	0.86	0.914	4.74e-110
DSC1	2.14e-13	0.486303	0.333	0.286	5.27e-09
SCEL	1.11e-33	0.485199	0.317	0.219	2.73e-29
IFFO2	8.27e-37	0.483357	0.567	0.562	2.03e-32
NFIB	3.61e-27	0.479728	0.673	0.707	8.87e-23
TOP2B	7.22e-47	0.476161	0.563	0.51	1.77e-42
MLANA	2.44e-52	0.474515	0.138	0.038	5.99e-48
CEP350	4.07e-42	0.473159	0.597	0.584	1e-37
PDCD4	8.54e-40	0.472397	0.683	0.705	2.1e-35
ARL5B	6.81e-45	0.470962	0.581	0.556	1.67e-40
TOR1AIP2	1.27e-36	0.466902	0.649	0.669	3.12e-32
KLF3	2.6e-51	0.465669	0.706	0.733	6.4e-47
LDLR	1.33e-45	0.463888	0.656	0.708	3.27e-41
B4GALT1	1.49e-38	0.460306	0.516	0.448	3.66e-34
ARGLU1	6.34e-55	0.460216	0.738	0.827	1.56e-50
ZFP36	1.04e-71	0.458406	0.888	0.909	2.54e-67
SGK1	1.54e-34	0.457237	0.697	0.759	3.78e-30
IER2	2.7e-84	0.457087	0.973	0.971	6.64e-80
PSAP	1.24e-26	0.456978	0.666	0.705	3.05e-22
MT-ND2	2.59e-252	0.456562	0.993	0.982	6.37e-248
MGST1	3.37e-73	0.454006	0.685	0.527	8.28e-69
ANKLE2	8.96e-38	0.453197	0.594	0.626	2.2e-33
DYNC1H1	3.47e-37	0.452615	0.684	0.738	8.53e-33
MYCBP2	2.44e-44	0.449849	0.73	0.78	5.99e-40
LRPPRC	2e-28	0.447517	0.592	0.599	4.91e-24
DDX17	6.11e-36	0.443867	0.742	0.824	1.5e-31
TXNRD1	4.1e-13	0.44307	0.511	0.543	1.01e-08
CHD4	3.75e-34	0.44292	0.649	0.732	9.22e-30
CANX	2.11e-58	0.442581	0.758	0.855	5.19e-54
CYLD	9.71e-38	0.442131	0.608	0.609	2.39e-33
SMG1	1.03e-35	0.441093	0.621	0.641	2.53e-31
ZFP36L1	7.42e-119	0.438836	0.952	0.961	1.82e-114
CCDC47	1.62e-52	0.438241	0.744	0.829	3.99e-48
GRHL1	1.87e-28	0.437389	0.512	0.471	4.59e-24
JUN	1.98e-98	0.437024	0.988	0.98	4.87e-94
ELL2	1.1e-41	0.435698	0.531	0.479	2.7e-37
SPAG9	1.9e-42	0.43251	0.699	0.764	4.66e-38
HIST1H2AH	1.51e-25	0.432164	0.267	0.188	3.72e-21
BHLHE40	1.36e-26	0.432112	0.652	0.711	3.34e-22
FAM83B	1.61e-28	0.431267	0.532	0.52	3.96e-24
PPP1CB	1.21e-29	0.431143	0.703	0.771	2.98e-25
EFNB2	2.56e-43	0.430604	0.472	0.382	6.3e-39
MXD1	2.65e-39	0.430251	0.485	0.402	6.53e-35
TM9SF3	1.26e-24	0.428266	0.627	0.674	3.09e-20
TTC3	4.7e-20	0.428033	0.59	0.619	1.16e-15
PER2	1.84e-56	0.426207	0.445	0.321	4.53e-52
SSFA2	2.47e-23	0.425183	0.598	0.623	6.07e-19
WNK1	4.78e-46	0.425084	0.683	0.734	1.17e-41
ARHGEF12	2.13e-31	0.424864	0.527	0.485	5.22e-27
TRPS1	4.89e-70	0.421809	0.425	0.269	1.2e-65
SPEN	7.86e-26	0.421657	0.583	0.615	1.93e-21
OGFRL1	1.04e-30	0.420399	0.534	0.495	2.55e-26
GCLC	7.06e-52	0.419346	0.379	0.254	1.74e-47
TRIP12	1.14e-28	0.418718	0.51	0.475	2.81e-24
KLF13	2.96e-37	0.418066	0.68	0.735	7.28e-33
ARHGAP5	5.2e-31	0.417269	0.559	0.551	1.28e-26
DSG3	1.29e-32	0.416249	0.73	0.858	3.18e-28
SETD2	5.43e-29	0.413872	0.54	0.518	1.34e-24
FILIP1L	2.15e-19	0.413825	0.321	0.25	5.29e-15
YWHAZ	8.05e-101	0.412248	0.921	0.966	1.98e-96
IRS2	4.4e-32	0.411763	0.482	0.433	1.08e-27
MAP3K8	3.78e-12	0.41174	0.564	0.651	9.29e-08
ASH1L	2.26e-25	0.411201	0.611	0.646	5.55e-21
NFKB1	2.58e-19	0.410154	0.583	0.685	6.33e-15
GTF2I	4.73e-33	0.409669	0.722	0.817	1.16e-28
KIF2A	2.56e-15	0.407817	0.579	0.617	6.29e-11
PELI1	5.89e-40	0.406762	0.479	0.405	1.45e-35
RBM6	4.11e-09	0.405373	0.464	0.461	0.00010105
F2RL1	4.64e-37	0.404929	0.485	0.432	1.14e-32
APOBEC3A	1.61e-21	0.403402	0.308	0.231	3.95e-17
PKP1	1.56e-60	0.402682	0.797	0.874	3.83e-56
EIF4B	4.42e-70	0.40122	0.788	0.908	1.09e-65
DDX39B	7.93e-38	0.400224	0.43	0.33	1.95e-33
RHOV	4.98e-64	0.399399	0.86	0.854	1.22e-59
GLUL	4e-19	0.398552	0.614	0.641	9.84e-15
EIF4G2	2.87e-87	0.398098	0.867	0.944	7.04e-83
RASGEF1B	1e-23	0.398002	0.422	0.363	2.46e-19
SPTBN1	7.6e-19	0.396151	0.554	0.569	1.87e-14
EIF4A2	5.61e-38	0.395983	0.788	0.882	1.38e-33
NCL	6.38e-106	0.393071	0.976	0.987	1.57e-101
SLK	1.1e-26	0.392903	0.665	0.751	2.7e-22
GLTP	3.34e-51	0.392402	0.847	0.896	8.22e-47
ANKRD11	9e-42	0.390054	0.706	0.838	2.21e-37
SF3B1	1.83e-33	0.387807	0.734	0.837	4.49e-29
DDX5	5.43e-106	0.386801	0.946	0.982	1.33e-101
TUT7	2.77e-21	0.386761	0.501	0.478	6.82e-17
PCM1	5.17e-20	0.386613	0.618	0.66	1.27e-15
KDM6B	4.43e-22	0.38595	0.586	0.64	1.09e-17
CHORDC1	1.41e-09	0.385869	0.65	0.736	3.48e-05
ABLIM1	6.13e-22	0.384695	0.571	0.594	1.51e-17
CUL3	2.62e-20	0.384537	0.562	0.576	6.45e-16
HP1BP3	8.82e-39	0.383138	0.775	0.881	2.17e-34
TPR	8.37e-51	0.383102	0.783	0.891	2.06e-46
ADRB2	5.78e-13	0.381658	0.5	0.492	1.42e-08
TRA2A	1.12e-14	0.381147	0.645	0.703	2.76e-10
CLTC	3.78e-17	0.381054	0.586	0.619	9.29e-13
EP300	3.21e-35	0.377151	0.496	0.432	7.89e-31
NIPBL	1.13e-19	0.376623	0.606	0.655	2.79e-15
AC020916.1	6.63e-15	0.374571	0.328	0.278	1.63e-10
SMARCA5	1.4e-15	0.374211	0.627	0.692	3.45e-11
MCL1	1.05e-54	0.373258	0.795	0.906	2.57e-50
SRSF6	2.28e-09	0.3727	0.569	0.612	5.61e-05
RALGPS2	3.77e-15	0.37193	0.506	0.497	9.27e-11
ZNF217	1.9e-13	0.371265	0.492	0.496	4.68e-09
AFF4	1.48e-19	0.370584	0.575	0.611	3.65e-15
CCDC6	1.29e-15	0.369873	0.567	0.605	3.18e-11
GPNMB	6.57e-43	0.369868	0.796	0.851	1.62e-38
SDC4	1.6e-18	0.369755	0.571	0.572	3.93e-14
DUSP1	4.2e-52	0.36975	0.944	0.945	1.03e-47
HUWE1	3.49e-16	0.368622	0.54	0.561	8.58e-12
CLDN1	5.27e-18	0.368331	0.658	0.668	1.3e-13
B3GNT5	3.82e-21	0.367944	0.489	0.473	9.39e-17
SET	9.55e-78	0.366946	0.938	0.974	2.35e-73
BIRC6	4.03e-19	0.365609	0.434	0.387	9.91e-15
PPP3CA	6.72e-10	0.364408	0.526	0.547	1.65e-05
DHX9	6.46e-20	0.364131	0.607	0.664	1.59e-15
CARD18	7.78e-22	0.363821	0.357	0.281	1.91e-17
EIF4G1	3.61e-25	0.363645	0.649	0.749	8.87e-21
ATRX	1.17e-20	0.363292	0.662	0.746	2.88e-16
SMARCA2	7.35e-13	0.362361	0.53	0.539	1.81e-08
CAST	1.01e-59	0.360995	0.85	0.931	2.49e-55
EXPH5	8.76e-17	0.360892	0.501	0.475	2.15e-12
SQSTM1	1e-37	0.36024	0.725	0.786	2.46e-33
2021-03-07	9.25e-16	0.360151	0.529	0.542	2.27e-11
GOLGA4	2.41e-53	0.360041	0.819	0.906	5.92e-49
PDIA3	2.52e-38	0.356105	0.785	0.898	6.2e-34
PLS3	1.92e-13	0.355576	0.612	0.693	4.72e-09
RPL31	1.27e-131	0.354529	0.974	0.994	3.12e-127
AKAP9	3.62e-21	0.35277	0.716	0.807	8.9e-17
EIF3A	1.29e-79	0.352636	0.852	0.942	3.16e-75
KLF5	1.1e-55	0.352441	0.821	0.9	2.71e-51
PNPLA8	1.63e-13	0.352186	0.556	0.609	4.01e-09
HIPK3	4.6e-20	0.351743	0.459	0.411	1.13e-15
LGALSL	5.28e-13	0.351588	0.491	0.496	1.3e-08
DLG1	1.16e-13	0.35153	0.506	0.52	2.86e-09
PPP4R3A	2.72e-18	0.351242	0.53	0.531	6.69e-14
CDK13	7.4e-22	0.351181	0.493	0.465	1.82e-17
SCAF11	1.24e-31	0.350348	0.745	0.861	3.04e-27
PLK3	1.49e-17	0.349567	0.525	0.547	3.65e-13
NUFIP2	2.55e-14	0.349452	0.63	0.715	6.27e-10
KAT6A	3.44e-18	0.348765	0.468	0.439	8.45e-14
ADNP	1.82e-15	0.347408	0.469	0.444	4.47e-11
ETV3	7.88e-13	0.347199	0.412	0.377	1.94e-08
CTNNA1	7.72e-20	0.346587	0.645	0.734	1.9e-15
KLK7	1.91e-11	0.346302	0.198	0.15	4.7e-07
FUS	5.85e-50	0.345823	0.868	0.954	1.44e-45
MYH9	2.61e-21	0.345377	0.654	0.75	6.41e-17
SPTAN1	1.84e-12	0.344855	0.517	0.538	4.53e-08
ALDH1A1	1.13e-20	0.344842	0.367	0.295	2.77e-16
SOX9	4.96e-14	0.343612	0.423	0.376	1.22e-09
KIF1B	7.03e-21	0.343525	0.436	0.391	1.73e-16
TET2	2.26e-28	0.342466	0.402	0.322	5.56e-24
RIF1	1.88e-14	0.342361	0.604	0.685	4.63e-10
PNN	7.48e-47	0.341573	0.8	0.928	1.84e-42
MYOF	5.4e-07	0.340438	0.511	0.552	0.0132662
N4BP2L2	2.36e-07	0.340418	0.639	0.742	0.00581341
CD109	2.86e-15	0.340275	0.494	0.487	7.04e-11
MIA3	9.41e-13	0.340012	0.451	0.431	2.31e-08
IQGAP1	1.47e-41	0.339869	0.751	0.871	3.62e-37
HSPA4L	1.23e-06	0.339113	0.546	0.6	0.0302419
ZKSCAN1	9.04e-15	0.338959	0.443	0.405	2.22e-10
LAMP2	2.6e-07	0.3388	0.602	0.678	0.00638279
ARRDC3	5.87e-07	0.337625	0.298	0.277	0.0144243
CD46	4.75e-10	0.337443	0.497	0.504	1.17e-05
SENP6	2.73e-11	0.337051	0.519	0.529	6.72e-07
GAN	3.47e-21	0.336859	0.364	0.295	8.53e-17
AZIN1	2.23e-11	0.336606	0.536	0.562	5.47e-07
RANBP2	5.17e-15	0.33633	0.514	0.526	1.27e-10
CSDE1	8.18e-33	0.33625	0.767	0.888	2.01e-28
ZBTB43	2.82e-14	0.336023	0.575	0.672	6.93e-10
CAND1	2.65e-09	0.335791	0.548	0.599	6.51e-05
ARID1B	8.25e-12	0.33501	0.565	0.615	2.03e-07
ILF3	2.8e-22	0.335007	0.684	0.782	6.89e-18
PRKDC	8.1e-28	0.334296	0.769	0.883	1.99e-23
ZHX1	1.11e-10	0.334111	0.515	0.525	2.73e-06
TNRC6B	2.24e-10	0.334066	0.549	0.588	5.51e-06
NRDC	1.45e-06	0.333917	0.564	0.624	0.0355516
NEBL	2.05e-22	0.333639	0.338	0.26	5.05e-18
UBE3A	4.17e-12	0.333263	0.586	0.646	1.03e-07
PRRC2B	1.86e-15	0.332225	0.481	0.465	4.56e-11
PHKG1	1.99e-26	0.331317	0.14	0.069	4.9e-22
ABI1	1.1e-11	0.330951	0.582	0.668	2.71e-07
HSPA5	2.4e-33	0.330243	0.809	0.905	5.9e-29
AP1G1	3.51e-17	0.330208	0.403	0.357	8.63e-13
IFI6	6.97e-07	0.329589	0.216	0.187	0.0171335
KMT2C	1.31e-13	0.32938	0.516	0.53	3.22e-09
VCP	1.07e-30	0.329277	0.745	0.871	2.64e-26
FYTTD1	1.68e-10	0.329151	0.58	0.633	4.13e-06
PALMD	1.84e-09	0.329115	0.642	0.735	4.52e-05
HADHA	2.27e-27	0.329073	0.735	0.866	5.59e-23
HSPA4	2.81e-11	0.329033	0.654	0.757	6.9e-07
C6orf62	2.26e-07	0.328845	0.525	0.558	0.00556436
CD2AP	2.6e-14	0.328843	0.517	0.524	6.38e-10
WAPL	1.2e-08	0.328101	0.523	0.558	0.000296039
RBM3	4.39e-82	0.327977	0.876	0.968	1.08e-77
DNAJB4	7.93e-08	0.326747	0.508	0.519	0.00194909
ARAP2	8.37e-18	0.326621	0.388	0.338	2.06e-13
TNKS2	1.01e-15	0.32649	0.45	0.425	2.48e-11
LYPD3	7.76e-28	0.326384	0.765	0.83	1.91e-23
CLCN3	8.06e-08	0.326261	0.401	0.396	0.00198052
SUPT16H	3.86e-14	0.325661	0.692	0.793	9.49e-10
TSPYL1	1.25e-06	0.325578	0.472	0.484	0.0307025
HES1	7.97e-20	0.325264	0.778	0.82	1.96e-15
ADAR	4.22e-09	0.324378	0.492	0.504	0.000103761
TUT4	2.78e-09	0.324359	0.563	0.615	6.84e-05
MYO5A	9.41e-17	0.323756	0.317	0.255	2.31e-12
IRF6	9.4e-18	0.323687	0.643	0.776	2.31e-13
PRPF4B	6.31e-21	0.323348	0.744	0.879	1.55e-16
PLXDC2	5.36e-10	0.321341	0.432	0.416	1.32e-05
MDM4	5.81e-10	0.321214	0.393	0.366	1.43e-05
PTPRF	1.03e-10	0.319789	0.584	0.64	2.54e-06
FBXO32	1.78e-10	0.318392	0.205	0.161	4.37e-06
KMT2A	2.22e-08	0.318312	0.555	0.632	0.000545026
KPNA4	2.11e-09	0.318254	0.588	0.654	5.18e-05
BARX2	2.42e-14	0.317981	0.496	0.486	5.95e-10
CHD8	4.56e-16	0.317884	0.453	0.427	1.12e-11
DDX42	2.93e-07	0.317593	0.507	0.544	0.00719414
CCND1	8.06e-27	0.317364	0.823	0.891	1.98e-22
NFAT5	1.64e-11	0.317082	0.545	0.59	4.02e-07
MX1	9e-22	0.317003	0.259	0.183	2.21e-17
TULP4	3.12e-14	0.3169	0.368	0.324	7.67e-10
SLC16A10	2.27e-21	0.316516	0.316	0.238	5.58e-17
PDZD8	2.22e-19	0.316504	0.394	0.335	5.45e-15
ATP2A2	8.97e-12	0.316191	0.533	0.567	2.21e-07
BDP1	2.49e-12	0.314995	0.633	0.735	6.13e-08
FNBP4	3.67e-12	0.314241	0.612	0.692	9.03e-08
PAXBP1	3.66e-12	0.314233	0.471	0.454	8.99e-08
CCNL2	5.36e-10	0.314035	0.473	0.483	1.32e-05
HECTD1	4.17e-07	0.313858	0.553	0.614	0.0102497
PIK3R1	1.59e-07	0.313305	0.505	0.517	0.00390903
MYSM1	1.21e-17	0.311989	0.383	0.329	2.98e-13
KDM5A	1.42e-11	0.311838	0.547	0.583	3.49e-07
BAZ2B	1.55e-09	0.311391	0.466	0.471	3.82e-05
RORA	7.32e-25	0.308911	0.644	0.601	1.8e-20
ETF1	3.58e-19	0.308866	0.694	0.826	8.79e-15
MBNL1	6.49e-08	0.308581	0.629	0.718	0.00159428
ZNF638	4.23e-07	0.308421	0.47	0.484	0.010396
DICER1	2.7e-11	0.30827	0.468	0.46	6.63e-07
SMC5	1.62e-10	0.308186	0.515	0.528	3.99e-06
TM9SF2	1.49e-10	0.308019	0.461	0.453	3.66e-06
ZNF644	6.18e-09	0.307583	0.508	0.538	0.000151971
KIAA1217	4.58e-10	0.306416	0.439	0.433	1.13e-05
ATP6V0A1	5.66e-12	0.305795	0.345	0.304	1.39e-07
AFTPH	3.78e-09	0.30513	0.51	0.55	9.3e-05
SNRNP200	1.17e-08	0.304965	0.544	0.605	0.000288595
HSPA9	3.97e-23	0.304773	0.75	0.862	9.75e-19
PLK2	1.75e-11	0.304289	0.719	0.799	4.3e-07
CLIP1	1.16e-11	0.30366	0.635	0.695	2.85e-07
ABCA12	8.03e-20	0.303342	0.351	0.286	1.97e-15
SETD5	6.6e-09	0.302439	0.504	0.526	0.000162314
SRRM2	8.67e-41	0.302201	0.801	0.927	2.13e-36
ZNF91	3.48e-22	0.30206	0.278	0.198	8.55e-18
ITPR2	2.62e-07	0.300788	0.435	0.437	0.0064471
PABPC1	3.82e-89	0.300741	0.935	0.984	9.38e-85
BRD1	3.23e-13	0.300532	0.411	0.378	7.94e-09
RIN2	3.3e-11	0.300414	0.394	0.368	8.1e-07
MARCKS	2.4e-29	0.299909	0.814	0.935	5.9e-25
MT1X	2.36e-49	0.29975	0.932	0.951	5.79e-45
CD55	8.34e-18	0.299506	0.662	0.685	2.05e-13
ELF1	8.09e-07	0.299308	0.567	0.647	0.0198858
SUPT6H	7.17e-09	0.298864	0.52	0.555	0.000176296
VPS53	4.17e-24	0.298602	0.353	0.275	1.02e-19
MYO10	1.11e-08	0.298025	0.464	0.48	0.000271847
TAX1BP1	3.75e-08	0.29776	0.693	0.812	0.000920699
INTS6	4.72e-08	0.297517	0.603	0.658	0.00115932
NRIP1	3.86e-40	0.297064	0.289	0.179	9.49e-36
BCLAF1	1.12e-21	0.296751	0.73	0.863	2.76e-17
ZBTB21	4.5e-15	0.296301	0.416	0.379	1.11e-10
SEMA3C	1.74e-57	0.296053	0.216	0.088	4.27e-53
MAP3K1	2.64e-07	0.295564	0.41	0.4	0.00648854
ANK3	1.9e-13	0.295535	0.371	0.33	4.67e-09
NIN	1.07e-13	0.295464	0.354	0.307	2.63e-09
BOD1L1	3.23e-10	0.29526	0.649	0.771	7.93e-06
ZNF207	4.43e-18	0.295147	0.7	0.837	1.09e-13
CIRBP	2.54e-40	0.294914	0.784	0.936	6.24e-36
ZFC3H1	6.15e-07	0.294313	0.517	0.553	0.0151069
ITGB8	3.92e-26	0.293754	0.328	0.242	9.65e-22
WTAP	5.14e-12	0.293508	0.651	0.75	1.26e-07
ATF7IP	4.01e-09	0.2934	0.358	0.324	9.87e-05
ATL2	1.17e-07	0.292557	0.446	0.446	0.0028695
NCKAP1	2.48e-08	0.292374	0.525	0.565	0.000609361
EEF2	6.6e-88	0.292203	0.935	0.985	1.62e-83
PPL	7.8e-10	0.290804	0.433	0.424	1.92e-05
CHD1	2.39e-07	0.29003	0.587	0.683	0.00588434
SETX	4.35e-17	0.289889	0.39	0.335	1.07e-12
TAF15	1.39e-06	0.28983	0.658	0.771	0.0341711
REL	3.42e-20	0.28914	0.727	0.866	8.41e-16
OGT	4.56e-26	0.288918	0.36	0.277	1.12e-21
ACTN4	1.81e-30	0.287562	0.755	0.885	4.46e-26
SOSTDC1	9.44e-25	0.287065	0.315	0.223	2.32e-20
EPHA4	3.58e-08	0.286196	0.324	0.293	0.000879082
HDLBP	1.29e-06	0.285887	0.615	0.729	0.031619
GPX4	4.38e-40	0.285747	0.857	0.945	1.08e-35
AKAP13	7.61e-09	0.285551	0.462	0.466	0.000187064
VPS13C	1.77e-06	0.284225	0.249	0.223	0.0435364
MAFF	2.35e-08	0.283575	0.579	0.645	0.000577668
EPPK1	4.82e-27	0.283034	0.318	0.228	1.18e-22
LBR	1.01e-06	0.282574	0.454	0.465	0.0248854
ZNF267	3.71e-22	0.282465	0.393	0.329	9.12e-18
MAP4K4	1.51e-08	0.282023	0.456	0.474	0.00037138
PPIP5K2	1.27e-06	0.281885	0.322	0.299	0.0312409
FLG	1.46e-13	0.281278	0.141	0.09	3.6e-09
VPS13D	4.28e-17	0.280867	0.375	0.315	1.05e-12
PIK3C2A	3.73e-14	0.280251	0.407	0.372	9.17e-10
SKIL	1.2e-10	0.279359	0.384	0.354	2.94e-06
ATP1A1	5.54e-28	0.278437	0.795	0.917	1.36e-23
RAB3IP	1.53e-12	0.277969	0.404	0.388	3.76e-08
KIAA0232	1.61e-25	0.27769	0.307	0.218	3.95e-21
EGFR	4.86e-07	0.277483	0.627	0.733	0.0119358
LONRF1	1.15e-10	0.276952	0.354	0.309	2.82e-06
HBEGF	4.3e-18	0.276535	0.732	0.781	1.06e-13
TMTC3	2.01e-07	0.276463	0.443	0.435	0.00492945
ZNF451	8.64e-07	0.275578	0.417	0.412	0.0212303
MT-ND3	2.21e-96	0.275326	0.995	0.986	5.43e-92
ERC1	1.6e-06	0.273677	0.441	0.446	0.0394213
TRPM7	1.35e-12	0.273475	0.367	0.32	3.32e-08
PMAIP1	1.47e-30	0.272309	0.818	0.916	3.61e-26
ATP1B1	3.87e-13	0.271756	0.442	0.397	9.53e-09
CASZ1	5.86e-08	0.270774	0.444	0.443	0.0014403
BRWD1	1.74e-07	0.270616	0.443	0.437	0.00428313
BACH1	1.04e-09	0.269293	0.409	0.393	2.55e-05
AHCTF1	2.75e-08	0.268379	0.457	0.458	0.000676824
LRRFIP1	4.2e-16	0.267828	0.708	0.871	1.03e-11
BRD2	2.51e-15	0.267387	0.702	0.842	6.16e-11
OPA1	1.22e-07	0.267309	0.392	0.375	0.00299765
DIAPH2	1.22e-12	0.266348	0.319	0.267	2.99e-08
SP3	1.24e-06	0.265374	0.412	0.404	0.0303922
MITF	7.1e-11	0.264663	0.153	0.107	1.74e-06
BPTF	5.5e-07	0.264079	0.662	0.823	0.0135206
FGD6	6.12e-11	0.263816	0.38	0.35	1.5e-06
LRBA	2.34e-13	0.263592	0.356	0.305	5.75e-09
ARHGEF5	6.57e-10	0.26286	0.395	0.372	1.62e-05
ZNF431	2.47e-15	0.261703	0.338	0.283	6.07e-11
RIOK3	7.49e-09	0.259243	0.677	0.792	0.00018415
JUND	1.78e-36	0.259196	0.885	0.959	4.38e-32
GBP6	1.25e-81	0.258619	0.212	0.059	3.08e-77
RBP1	1.55e-07	0.258207	0.616	0.658	0.00382249
ZMYM2	3.36e-16	0.257934	0.33	0.264	8.27e-12
MT-CO3	2.08e-86	0.257491	1	0.991	5.11e-82
ERBIN	1.18e-10	0.25749	0.413	0.385	2.91e-06
INO80D	2.07e-11	0.25729	0.388	0.355	5.09e-07
ZNF791	9.71e-08	0.256732	0.394	0.375	0.00238666
FOSL1	2.37e-12	0.256301	0.464	0.456	5.83e-08
MARK2	1.02e-06	0.255674	0.443	0.456	0.0250354
CDC42BPB	8.24e-11	0.25413	0.401	0.372	2.02e-06
EHF	2.47e-10	0.253807	0.735	0.842	6.07e-06
ZNF430	8.64e-10	0.253395	0.416	0.401	2.12e-05
HTT	4.94e-11	0.253114	0.375	0.342	1.21e-06
CPEB4	7.04e-09	0.252716	0.362	0.331	0.000173153
PIBF1	1.47e-10	0.252538	0.293	0.246	3.62e-06
EIF5	1.74e-45	0.251809	0.873	0.961	4.28e-41
ELMSAN1	1.05e-13	0.251564	0.396	0.36	2.58e-09
EPS15	8.64e-11	0.250375	0.294	0.247	2.13e-06

## Sheet: Supplementary file 1e
Supplementary file 1e AK candidate driver genes and antibodies for IF.
Gene	Antibodies	Source
ALDH3A1	anti-ALDH3A1 mouse monoclonal antibody	Santa Cruz Biotechnology, Inc., Santa Cruz, CA
IGFBP2	anti-IGFBP2 rabbit monoclonal antibody	Abcam, UK
KLF6	anti-KLF6 rabbit polyclonal antibody	Signalway Antibody LLC, Maryland, USA
KLK7	anti-KLK7 Rabbit monoclonal antibody	Abcam, UK
NFKBIZ	anti-IKB zeta rabbit polyclonal antibody	Novus Biologicals, Inc., CO, USA
PTN	anti-PTN mouse monoclonal antibody	Santa Cruz Biotechnology, Inc., Santa Cruz, CA
RND3	anti-RND3 rabbit polyclonal antibody	Novus Biologicals, Inc., CO, USA

## Sheet: Supplementary file 1f
Supplementary file 1f The gene list of overlapped up-regulated DEGs in Basal subpopulation of P2 from AK vs normal and SCCIS vs AK.
	AK vs NORMAL					SCCIS vs AK
	p_val	avg_logFC	pct.1	pct.2	p_val_adj	p_val	avg_logFC	pct.1	pct.2	p_val_adj
ANXA1	5.42e-08	0.484544	0.945	0.948	0.00131064	3.03e-39	0.445337	0.97	0.944	7.33e-35
CD9	2.13e-26	0.298259	0.973	0.976	5.17e-22	1.18e-57	0.499983	0.988	0.968	2.85e-53
CHMP1B	4.08e-32	0.408405	0.895	0.693	9.87e-28	4.1e-17	0.325899	0.834	0.892	9.93e-13
COL17A1	1.04e-12	0.350954	0.913	0.882	2.53e-08	2.81e-19	0.368652	0.965	0.907	6.79e-15
EMP1	4.03e-26	0.396301	0.9	0.763	9.76e-22	7.82e-08	0.345527	0.822	0.896	0.0018921
EPHA2	1.32e-44	0.402794	0.738	0.341	3.21e-40	2.91e-14	0.422909	0.678	0.734	7.04e-10
ERRFI1	9.96e-25	0.372982	0.624	0.327	2.41e-20	8.38e-33	0.735805	0.694	0.623	2.03e-28
ETS2	2.27e-55	0.572669	0.959	0.841	5.48e-51	1.42e-16	0.29787	0.939	0.955	3.44e-12
FOSL1	1.01e-67	0.580423	0.802	0.351	2.43e-63	2.4e-32	0.586031	0.798	0.799	5.82e-28
JUND	9.48e-80	0.795299	0.986	0.965	2.29e-75	1.28e-28	0.486328	0.994	0.984	3.11e-24
KLF6	2.2e-32	0.54576	0.964	0.893	5.32e-28	6.06e-45	0.504113	0.971	0.962	1.47e-40
MT-ND2	1.34e-74	0.417379	0.979	0.993	3.25e-70	1.2e-10	0.255703	0.991	0.98	2.9e-06
MT-ND3	6.98e-41	0.283666	0.973	0.996	1.69e-36	4.87e-49	0.278341	0.993	0.971	1.18e-44
MYC	7.19e-08	0.289885	0.852	0.777	0.0017392	1.43e-12	0.260711	0.836	0.849	3.47e-08
NDRG1	5.48e-21	0.306763	0.9	0.732	1.33e-16	2e-10	0.336385	0.853	0.896	4.84e-06
RHOB	2.83e-18	0.298107	0.793	0.552	6.85e-14	1.6e-09	0.450189	0.703	0.788	3.87e-05
SERPINB5	5.78e-46	0.51725	0.964	0.835	1.4e-41	1.12e-11	0.263612	0.935	0.962	2.71e-07
SOCS3	8.23e-16	0.419041	0.793	0.612	1.99e-11	4.84e-11	0.257227	0.768	0.786	1.17e-06
SUN1	2.97e-29	0.276062	0.715	0.381	7.2e-25	2.93e-08	0.251835	0.627	0.713	0.000709115
TNS4	4.03e-29	0.333102	0.706	0.405	9.76e-25	6.09e-65	0.718689	0.841	0.7	1.47e-60
ZNF706	4.94e-13	0.289349	0.959	0.921	1.2e-08	8.3e-20	0.282365	0.936	0.955	2.01e-15

## Sheet: Supplementary file 1g
Supplementary file 1g The gene list of overlapped down-regulated DEGs in Basal subpopulation of P2 from AK vs normal and SCCIS vs AK.
	AK vs NORMAL					SCCIS vs AK
	p_val	avg_logFC	pct.1	pct.2	p_val_adj	p_val	avg_logFC	pct.1	pct.2	p_val_adj
YBX1	7.13437e-23	-0.339748	0.982	0.993	1.72659e-18	1.3972e-58	-0.339015	0.974	0.982	3.38136e-54
ENO1	4.09999e-27	-0.359396	0.979	0.985	9.9224e-23	7.31924e-35	-0.331287	0.918	0.979	1.77133e-30
RPS2	2.86e-29	-0.28059	1	1	6.92e-25	3.95397e-70	-0.507361	0.995	1	9.569e-66
PKM	2.07869e-27	-0.298008	0.975	0.984	5.03064e-23	2.89355e-28	-0.282034	0.898	0.975	7.00269e-24
DDIT4	4.87651e-14	-0.387821	0.704	0.769	1.18016e-09	2.81824e-30	-0.410165	0.367	0.704	6.82041e-26
S100A14	9.41647e-09	-0.254854	0.97	0.967	0.000227888	3.94136e-48	-0.604087	0.786	0.97	9.53848e-44
IMPDH2	3.0825e-19	-0.28144	0.843	0.873	7.45996e-15	3.47572e-48	-0.33129	0.439	0.843	8.4116e-44
SLC25A5	8.84584e-22	-0.276664	0.966	0.971	2.14078e-17	4.98178e-83	-0.602164	0.846	0.966	1.20564e-78
GAPDH	2.35901e-88	-0.607405	0.993	0.997	5.70903e-84	4.01995e-59	-0.449231	0.973	0.993	9.72869e-55
SPRR2A	1.04038e-09	-0.421759	0.54	0.671	2.51782e-05	1.66596e-55	-0.640612	0.179	0.54	4.03179e-51
TUBA1B	8.44479e-09	-0.327393	0.929	0.906	0.000204372	2.51143e-26	-0.369205	0.698	0.929	6.07791e-22
PA2G4	2.16333e-18	-0.274836	0.952	0.955	5.23547e-14	1.0677e-37	-0.351409	0.752	0.952	2.58394e-33

## Sheet: Supplementary file 1h
Supplementary file 1h The gene list of up-regulated DEGs between Basal-SCCIS-tumor vs Basal-SCCIS-normal.
	p_val	avg_log2FC	pct.1	pct.2	p_val_adj
HSPA1A	2.66e-240	2.49369	0.968	0.921	6.45e-236
KRT16	1.9e-261	2.4631	0.978	0.74	4.6e-257
KRT6C	5e-223	2.36152	0.821	0.295	1.21e-218
S100A7	1.69e-128	2.35352	0.902	0.735	4.09e-124
HSPA1B	1.68e-228	2.28289	0.914	0.644	4.06e-224
HSPA6	5.38e-114	2.10896	0.557	0.167	1.3e-109
FOS	8.49e-192	2.07429	0.982	0.936	2.05e-187
GJB6	7.11e-179	1.91481	0.811	0.415	1.72e-174
CALML3	5.79e-214	1.83764	0.773	0.233	1.4e-209
CALML5	3.01e-204	1.81585	0.721	0.159	7.28e-200
ZFAND2A	1.56e-124	1.81381	0.726	0.362	3.79e-120
KRT6A	5.27e-217	1.79583	0.97	0.798	1.28e-212
CDKN1C	1.07e-133	1.69572	0.592	0.15	2.59e-129
KRT6B	1.32e-110	1.68506	0.713	0.364	3.2e-106
ATF3	3e-144	1.68196	0.925	0.769	7.25e-140
DNAJB1	1.12e-166	1.63367	0.962	0.9	2.72e-162
HSP90AA1	7.5e-238	1.63102	0.995	0.997	1.81e-233
ID1	4.01e-87	1.61558	0.909	0.814	9.7e-83
KRT1	2.69e-58	1.54031	0.602	0.357	6.5e-54
S100A8	1.57e-90	1.44027	0.953	0.926	3.8e-86
SESN3	8.53e-191	1.43898	0.768	0.255	2.07e-186
UBB	1.15e-185	1.4133	0.982	0.964	2.79e-181
JUN	4.97e-162	1.3684	0.984	0.985	1.2e-157
HSPB1	3.91e-132	1.33275	0.982	0.966	9.45e-128
HSPA8	3.05e-135	1.31062	0.928	0.931	7.38e-131
C10orf99	4.54e-124	1.30811	0.398	0.032	1.1e-119
MAF	1.82e-168	1.28129	0.833	0.383	4.41e-164
MAGEA4	3e-249	1.26928	0.655	0.034	7.26e-245
CRYAB	1.35e-39	1.26095	0.405	0.19	3.28e-35
DSG1	6.61e-129	1.25518	0.814	0.447	1.6e-124
DSC2	7.18e-127	1.25346	0.783	0.433	1.74e-122
OCIAD2	3.88e-138	1.23567	0.836	0.535	9.39e-134
ITM2B	2.36e-251	1.23351	0.992	0.99	5.7e-247
CSRP2	2.11e-107	1.21957	0.733	0.411	5.11e-103
ITGA6	3.14e-119	1.21567	0.888	0.678	7.59e-115
CST3	1.91e-135	1.21403	0.87	0.611	4.62e-131
SFRP1	3.48e-163	1.2043	0.763	0.284	8.43e-159
MRPL18	1.03e-117	1.17848	0.842	0.603	2.5e-113
AC136616.1	5.26e-232	1.14892	0.668	0.054	1.27e-227
COL7A1	8.64e-127	1.14049	0.842	0.468	2.09e-122
HLA-DRA	4.13e-58	1.13369	0.596	0.32	9.99e-54
HSPE1	1.77e-163	1.11846	0.958	0.936	4.27e-159
C9orf3	1.57e-162	1.10541	0.934	0.702	3.8e-158
SDCCAG8	3.19e-174	1.10533	0.764	0.243	7.72e-170
KRT17	2.42e-109	1.09429	0.977	0.913	5.85e-105
CACYBP	3.65e-138	1.09068	0.811	0.469	8.83e-134
CIB1	6.09e-143	1.08958	0.854	0.571	1.47e-138
FAM213A	3.78e-117	1.08029	0.858	0.648	9.14e-113
CBR1	7.37e-125	1.0773	0.846	0.585	1.78e-120
CLCA2	7.83e-138	1.0762	0.866	0.61	1.89e-133
GJA1	3.76e-111	1.06367	0.826	0.482	9.1e-107
MXD4	1.8e-170	1.06155	0.761	0.268	4.37e-166
DBI	3.05e-134	1.06043	0.934	0.773	7.38e-130
SH3PXD2A	2.32e-145	1.05154	0.845	0.439	5.63e-141
HLA-DRB1	2.13e-49	1.05021	0.58	0.335	5.14e-45
HSPH1	1.54e-85	1.04706	0.923	0.86	3.72e-81
ATP1B3	9.03e-188	1.047	0.982	0.945	2.18e-183
THBS2	2.02e-107	1.0463	0.657	0.26	4.9e-103
SLC39A6	3.88e-80	1.03116	0.674	0.376	9.38e-76
HSP90AB1	1.21e-156	1.02773	0.993	0.994	2.93e-152
ADM	7.4e-91	1.02385	0.739	0.374	1.79e-86
STMP1	1.24e-143	1.02015	0.801	0.44	3.01e-139
COL17A1	7.84e-113	1.00951	0.986	0.948	1.9e-108
UBC	4.95e-129	1.00842	0.996	1	1.2e-124
C12orf75	1.83e-17	1.00688	0.651	0.583	4.42e-13
ODF2L	1.12e-176	1.00525	0.715	0.183	2.71e-172
CXCL14	1.03e-56	0.995811	0.989	0.991	2.48e-52
ITGB4	2.6e-115	0.990794	0.872	0.603	6.29e-111
LAD1	2.71e-142	0.989185	0.76	0.339	6.56e-138
ADIRF	2.61e-89	0.962406	0.702	0.381	6.33e-85
CBX3	6.71e-141	0.957185	0.836	0.494	1.62e-136
KLF10	5.35e-67	0.955313	0.83	0.639	1.3e-62
HSPD1	4.16e-107	0.954035	0.923	0.86	1.01e-102
FIS1	6.53e-130	0.951277	0.836	0.574	1.58e-125
SOX4	5.62e-91	0.941383	0.805	0.438	1.36e-86
DUSP1	8.47e-62	0.936839	0.953	0.951	2.05e-57
CCND2	7.2e-103	0.927591	0.754	0.41	1.74e-98
JUND	4.63e-117	0.926516	0.99	0.997	1.12e-112
VPS36	5.23e-138	0.922435	0.735	0.293	1.27e-133
SLC7A1	1e-102	0.922077	0.831	0.535	2.43e-98
HNRNPA2B1	2.99e-165	0.922039	0.976	0.935	7.23e-161
SAP25	7.03e-201	0.920866	0.569	0.034	1.7e-196
CLSTN1	3.33e-101	0.913285	0.84	0.531	8.07e-97
GTF2I	4.33e-122	0.913223	0.841	0.516	1.05e-117
PKP1	1.25e-99	0.908215	0.837	0.506	3.02e-95
DSC3	1.93e-97	0.899778	0.954	0.882	4.67e-93
AP1S1	2.27e-121	0.894628	0.725	0.322	5.49e-117
RECQL	1.28e-57	0.894549	0.447	0.17	3.1e-53
FTL	1.85e-61	0.883807	0.987	0.987	4.48e-57
GCSH	1.09e-106	0.878907	0.669	0.297	2.63e-102
PDAP1	9.08e-114	0.878393	0.795	0.489	2.2e-109
SLC7A8	1.48e-107	0.866424	0.587	0.171	3.59e-103
HOPX	5.67e-77	0.866297	0.888	0.766	1.37e-72
HMGB1	4.52e-172	0.863666	0.985	0.965	1.09e-167
IFI27	8.9e-35	0.85415	0.639	0.431	2.15e-30
SERPINH1	1.22e-87	0.852147	0.626	0.268	2.94e-83
GNB2	7.9e-130	0.848638	0.854	0.526	1.91e-125
RHOB	2.27e-62	0.843022	0.807	0.621	5.49e-58
MT-ND2	5.29e-188	0.841984	0.986	0.995	1.28e-183
IGFBP2	4.55e-22	0.841665	0.325	0.182	1.1e-17
TRIM47	2.22e-135	0.841259	0.606	0.152	5.37e-131
ATP5MF	6.4e-130	0.838051	0.92	0.859	1.55e-125
BCAP31	1.13e-98	0.83741	0.822	0.598	2.74e-94
KLF11	4.18e-61	0.837111	0.621	0.342	1.01e-56
PDZK1IP1	1.32e-43	0.833728	0.477	0.251	3.19e-39
CA2	9.76e-54	0.832974	0.589	0.316	2.36e-49
SEM1	4.48e-142	0.830556	0.943	0.878	1.08e-137
TIMP3	5.77e-58	0.816106	0.42	0.146	1.4e-53
CUX1	1.4e-104	0.813985	0.591	0.188	3.38e-100
PRKDC	2.18e-102	0.811038	0.716	0.339	5.28e-98
MRPL20	1.77e-105	0.809713	0.777	0.436	4.27e-101
PSAP	1.44e-93	0.809019	0.812	0.49	3.47e-89
CHORDC1	3.32e-92	0.804651	0.725	0.383	8.03e-88
NSG1	1.59e-59	0.803086	0.7	0.486	3.84e-55
RPS19BP1	3.74e-105	0.794862	0.776	0.467	9.05e-101
DSG3	1.76e-67	0.793036	0.885	0.712	4.26e-63
CTSC	2.61e-104	0.789623	0.676	0.275	6.32e-100
SLC2A1	6.25e-74	0.786911	0.953	0.868	1.51e-69
TP63	4.47e-84	0.783393	0.814	0.501	1.08e-79
FSCN1	3.57e-82	0.781551	0.868	0.716	8.65e-78
TAGLN2	1.38e-104	0.781266	0.916	0.802	3.33e-100
RAB2A	2.95e-115	0.78113	0.887	0.673	7.13e-111
FGFR3	1.05e-76	0.77859	0.786	0.48	2.54e-72
KLF3	2.39e-53	0.776222	0.816	0.63	5.79e-49
SEC61G	2.61e-112	0.774894	0.905	0.8	6.31e-108
RNF7	2.16e-111	0.768915	0.894	0.691	5.22e-107
ATP5ME	1.59e-83	0.765818	0.906	0.836	3.84e-79
MLF1	5.91e-85	0.762451	0.622	0.239	1.43e-80
PLPP2	5.11e-88	0.756895	0.71	0.363	1.24e-83
SLC7A5	3.97e-67	0.750156	0.771	0.495	9.62e-63
LAMP1	3.81e-82	0.748259	0.808	0.526	9.23e-78
SYT8	2.56e-40	0.746333	0.403	0.182	6.2e-36
RXRA	1.89e-95	0.745435	0.717	0.34	4.58e-91
NAA20	1.08e-87	0.743432	0.757	0.485	2.62e-83
HMGN3	4.02e-81	0.743024	0.86	0.725	9.74e-77
KLF13	7.98e-78	0.74207	0.883	0.664	1.93e-73
2021-09-07	1.05e-102	0.741962	0.861	0.604	2.55e-98
S100A9	2.06e-36	0.741651	0.974	0.971	4.99e-32
DDIT3	9.67e-55	0.740991	0.565	0.296	2.34e-50
NDUFA4	1.54e-120	0.740863	0.95	0.955	3.73e-116
CD74	8.04e-16	0.739432	0.471	0.35	1.95e-11
IFI16	7.17e-84	0.736173	0.847	0.603	1.74e-79
KRT5	1.28e-93	0.734524	0.999	0.999	3.11e-89
CFAP97	3.13e-97	0.733555	0.631	0.248	7.58e-93
LIMCH1	3.37e-90	0.73128	0.579	0.205	8.16e-86
RFC1	2.57e-83	0.729674	0.581	0.227	6.21e-79
XIST	1.81e-62	0.724084	0.911	0.775	4.38e-58
PTGES3	7.56e-101	0.720979	0.925	0.843	1.83e-96
JUP	8.8e-70	0.720241	0.871	0.684	2.13e-65
MRPS34	1.04e-79	0.716743	0.725	0.438	2.51e-75
NDUFB2	2.35e-75	0.714212	0.86	0.757	5.7e-71
CCT6A	2.49e-76	0.710111	0.81	0.612	6.02e-72
GRN	2.57e-66	0.709866	0.745	0.526	6.21e-62
SYPL1	3.14e-89	0.704816	0.853	0.659	7.6e-85
RANBP1	2.21e-80	0.703515	0.821	0.635	5.35e-76
PERP	5.65e-144	0.699191	0.999	0.999	1.37e-139
CANX	1.53e-58	0.697963	0.736	0.491	3.7e-54
PKM	1.82e-79	0.693809	0.937	0.868	4.4e-75
NUPR1	5.01e-53	0.692165	0.726	0.486	1.21e-48
OCIAD1	1.97e-79	0.692135	0.764	0.51	4.78e-75
CNBP	7.06e-101	0.691449	0.933	0.792	1.71e-96
GTF3A	5.81e-81	0.691339	0.7	0.383	1.41e-76
H1FX	2.84e-44	0.688437	0.824	0.651	6.88e-40
UQCR10	7.52e-76	0.687791	0.85	0.728	1.82e-71
ZNHIT1	2.19e-80	0.685087	0.792	0.56	5.3e-76
BSG	4.19e-73	0.684664	0.85	0.67	1.01e-68
APCDD1	2.21e-67	0.683925	0.496	0.179	5.36e-63
XRCC6	9.71e-74	0.683168	0.785	0.532	2.35e-69
GPNMB	4.88e-17	0.675687	0.819	0.807	1.18e-12
RNF187	4.78e-91	0.674385	0.595	0.226	1.16e-86
DST	2.52e-62	0.671696	0.969	0.898	6.1e-58
ZFP36L2	1.44e-49	0.668927	0.938	0.791	3.48e-45
PPIA	4.25e-147	0.668124	0.996	0.998	1.03e-142
HSBP1	7.24e-87	0.667253	0.844	0.65	1.75e-82
BANF1	9.04e-77	0.666176	0.777	0.52	2.19e-72
GSTO1	4.13e-55	0.665929	0.741	0.529	9.98e-51
NR1D1	5.43e-46	0.664694	0.651	0.402	1.31e-41
TRA2B	3.42e-50	0.664051	0.843	0.709	8.28e-46
SSBP1	1.45e-75	0.662909	0.846	0.749	3.52e-71
ATP5IF1	8.15e-89	0.65786	0.904	0.801	1.97e-84
IER2	8.76e-13	0.656732	0.935	0.967	2.12e-08
HRAS	9.76e-83	0.654261	0.887	0.747	2.36e-78
UBE2V2	2.98e-82	0.653467	0.629	0.272	7.22e-78
MRFAP1	2.18e-84	0.652921	0.855	0.661	5.27e-80
CD151	3.14e-66	0.649229	0.71	0.423	7.61e-62
ENY2	1.48e-84	0.647862	0.887	0.739	3.59e-80
MRPS21	2.39e-76	0.647334	0.783	0.522	5.79e-72
STUB1	8.25e-76	0.645559	0.763	0.509	2e-71
ZNF706	1.2e-80	0.641889	0.956	0.92	2.91e-76
MAFB	1.97e-65	0.639522	0.734	0.436	4.77e-61
VPS28	3.78e-76	0.63947	0.813	0.626	9.15e-72
MALAT1	6.76e-83	0.638514	0.997	1	1.64e-78
CTSD	4.53e-58	0.638174	0.819	0.634	1.1e-53
ASCL2	3.52e-81	0.63761	0.525	0.172	8.53e-77
SDC1	7.53e-57	0.637448	0.832	0.612	1.82e-52
SF1	2.62e-59	0.636436	0.876	0.706	6.35e-55
HOMER3	9.68e-84	0.635475	0.522	0.172	2.34e-79
COMMD3	4.85e-81	0.635264	0.617	0.26	1.17e-76
MTDH	1.09e-75	0.635069	0.884	0.776	2.63e-71
H2AFV	6.29e-77	0.634808	0.823	0.57	1.52e-72
FRAT2	1.89e-52	0.63321	0.498	0.221	4.57e-48
PKP3	4.43e-76	0.632795	0.747	0.416	1.07e-71
FOSB	9.62e-45	0.628582	0.97	0.977	2.33e-40
TUBB	1.76e-55	0.623826	0.848	0.676	4.26e-51
PSMG3	5.47e-93	0.622903	0.555	0.174	1.32e-88
PHF14	1.83e-76	0.619725	0.667	0.32	4.44e-72
MRPS33	5.36e-61	0.61889	0.647	0.382	1.3e-56
UBE2K	6.16e-71	0.617941	0.753	0.452	1.49e-66
KRT19	2.17e-24	0.616469	0.14	0.032	5.25e-20
CD9	3.02e-90	0.615755	0.989	0.987	7.3e-86
COX6C	3.3e-97	0.614012	0.961	0.954	7.98e-93
ANAPC16	2.1e-71	0.611249	0.824	0.617	5.07e-67
NLGN4X	9.54e-117	0.610027	0.353	0.015	2.31e-112
SERF2	8.21e-120	0.609125	0.985	0.994	1.99e-115
PRDX1	8.87e-91	0.608187	0.96	0.948	2.15e-86
TMBIM1	2.75e-62	0.608176	0.645	0.327	6.65e-58
PPP1R35	4.54e-90	0.606901	0.575	0.2	1.1e-85
IFITM3	1.08e-40	0.606161	0.925	0.912	2.62e-36
SRI	1.41e-65	0.604161	0.766	0.521	3.42e-61
PPIB	9.97e-57	0.603651	0.871	0.784	2.41e-52
TRMT112	6.82e-77	0.602639	0.905	0.847	1.65e-72
TYMP	1.53e-33	0.601924	0.755	0.597	3.7e-29
KLF9	7.18e-46	0.601452	0.595	0.329	1.74e-41
ENO1	1.63e-69	0.600203	0.938	0.904	3.95e-65
MIDN	1.19e-35	0.599685	0.842	0.723	2.88e-31
DEDD2	1.95e-59	0.599014	0.588	0.291	4.72e-55
LSP1	9.35e-89	0.596041	0.412	0.08	2.26e-84
FERMT1	2.23e-55	0.595439	0.661	0.378	5.39e-51
SDF2L1	9.65e-75	0.593496	0.572	0.23	2.33e-70
C8orf59	3.95e-63	0.592787	0.838	0.724	9.56e-59
TMEM230	8.14e-69	0.590755	0.649	0.323	1.97e-64
SOX7	1.93e-61	0.58974	0.557	0.243	4.67e-57
H1F0	2.24e-42	0.589439	0.421	0.179	5.43e-38
SPINT2	1.3e-63	0.588556	0.92	0.829	3.14e-59
VSNL1	1.21e-74	0.587624	0.57	0.232	2.92e-70
NT5C	4.77e-63	0.585452	0.647	0.326	1.15e-58
CPNE3	2.14e-60	0.585017	0.679	0.393	5.19e-56
H3F3B	7.5e-74	0.584971	0.998	0.997	1.82e-69

## Sheet: Supplementary file 1i
Supplementary file 1i SCCIS candidate driver genes and antibodies for IHC.
Gene	Antibodies	Source
MAGEA4	anti-MAGEA4 rabbit monoclonal antibody	Cell Signaling Technology, Inc., Danvers, USA
ITGA6	anti-ITGA6 rabbit polyclonal antibody	Zen Bioscience, Chengdu, China
DDIT3	anti-DDIT3 (7G7) Mouse monoclonal antibody	Zen Bioscience, Chengdu, China
SESN3	anti-SESN3 Rabbit polyclonal antibody	Zen Bioscience, Chengdu, China
SLC7A1	anti-CAT-1 Rabbit Polyclonal Antibody	Proteintech Group, Inc., China
SLC7A5	anti-SLC7A5 Rabbit Polyclonal Antibody	Proteintech Group, Inc., China

## Sheet: Supplementary file 1j
Supplementary file 1j The gene list of up-regulated DEGs in cSCC Basal1 subpopulation.
	p_val	avg_log2FC	pct.1	pct.2	p_val_adj
ISG15	0	2.94834	0.577	0.069	0
IFI6	0	2.85237	0.623	0.097	0
CDKN2A	0	2.13331	0.505	0.057	0
BST2	0	1.94205	0.464	0.038	0
SOCS1	0	1.64627	0.807	0.187	0
IFITM3	0	1.57691	0.965	0.838	0
IER5L	0	1.54553	0.782	0.299	0
SAT1	0	1.51738	0.957	0.703	0
GADD45B	0	1.50612	0.931	0.604	0
TMSB10	0	1.50205	0.995	0.979	0
UBE2S	0	1.49269	0.934	0.627	0
NFKBIZ	0	1.40248	0.9	0.587	0
FTH1	0	1.38221	0.998	0.995	0
IRF1	0	1.38092	0.957	0.693	0
TYMP	0	1.3717	0.915	0.734	0
STAT1	0	1.32266	0.636	0.214	0
DNAJA1	0	1.3146	0.992	0.941	0
SFRP1	0	1.24984	0.869	0.343	0
TNFSF10	0	1.21126	0.898	0.604	0
JUN	0	1.19895	0.995	0.98	0
FOSB	0	1.19855	0.984	0.921	0
PARP14	0	1.13619	0.617	0.195	0
RHOB	0	1.09423	0.887	0.577	0
ARPC1B	0	1.08279	0.786	0.326	0
MARCKSL1	0	1.06342	0.797	0.337	0
RNF213	0	1.05275	0.745	0.327	0
ITGA6	0	1.0445	0.856	0.508	0
EGR1	0	1.03302	0.972	0.904	0
BRD2	0	1.02613	0.946	0.743	0
B2M	0	0.960163	1	0.999	0
XAF1	0	0.950115	0.606	0.171	0
IFI44L	0	0.939288	0.432	0.013	0
EPSTI1	0	0.902774	0.459	0.039	0
HSPA8	0	0.887916	0.988	0.943	0
IFITM1	0	0.871964	0.646	0.171	0
TNC	0	0.818508	0.525	0.072	0
RNF152	0	0.780963	0.591	0.132	0
H3F3B	0	0.75449	0.999	0.995	0
ITM2B	0	0.63329	0.988	0.984	0
HSPA1B	1.81e-301	1.02301	0.983	0.932	4.55e-297
C1S	4.53e-299	0.944653	0.568	0.139	1.14e-294
BTG1	1.49e-293	0.985283	0.988	0.964	3.75e-289
JAG2	5.02e-291	0.631728	0.693	0.221	1.26e-286
COL17A1	5.3e-288	0.86299	0.966	0.758	1.33e-283
HLA-DRB1	1.5e-286	2.44494	0.579	0.201	3.77e-282
KTN1	2.97e-282	0.994451	0.975	0.941	7.48e-278
HLA-DRA	1.93e-281	2.82005	0.575	0.21	4.87e-277
CXCL14	2.67e-279	1.3807	0.976	0.874	6.72e-275
HLA-B	9.99e-278	0.973559	0.994	0.982	2.51e-273
C1R	2.06e-277	0.875333	0.677	0.288	5.19e-273
IFIT3	2.28e-277	0.954007	0.436	0.041	5.74e-273
HLA-DPA1	3.1e-276	1.9783	0.459	0.076	7.81e-272
ATF3	2.31e-274	1.17666	0.981	0.909	5.82e-270
EIF4A3	4.54e-272	1.1842	0.909	0.689	1.14e-267
IGFBP7	7.26e-272	0.942195	0.463	0.061	1.83e-267
HLA-DMA	3.7e-269	0.863972	0.459	0.07	9.31e-265
GPRC5A	5.88e-269	0.939447	0.417	0.037	1.48e-264
NNMT	9.12e-269	1.18241	0.427	0.042	2.29e-264
SOCS3	1.12e-266	1.09322	0.912	0.721	2.83e-262
SDCCAG8	1.59e-265	0.730552	0.735	0.385	3.99e-261
ANKRD37	4.63e-265	1.54366	0.705	0.371	1.16e-260
SOD2	2.29e-261	1.17694	0.883	0.643	5.75e-257
C12orf75	5.83e-260	1.31424	0.796	0.51	1.47e-255
APOL6	2.2e-259	0.610073	0.474	0.082	5.55e-255
IFI27	3.04e-259	1.96036	0.853	0.715	7.64e-255
SERPING1	1.22e-258	0.772222	0.441	0.06	3.07e-254
ICAM1	2.41e-258	0.860012	0.45	0.065	6.07e-254
NFKBIA	2.96e-255	0.763816	0.992	0.952	7.44e-251
APOL1	2.97e-255	0.766677	0.398	0.034	7.47e-251
HSPA2	1.33e-252	0.823888	0.721	0.341	3.34e-248
CDH3	6.69e-252	0.706337	0.674	0.3	1.68e-247
COPZ2	9.02e-252	0.651104	0.781	0.423	2.27e-247
HSPH1	7.5e-248	0.924595	0.951	0.824	1.89e-243
CLCA2	3.55e-247	0.81038	0.792	0.525	8.92e-243
ZC3HAV1	1.06e-246	0.749347	0.622	0.239	2.66e-242
PLSCR1	3.71e-246	0.581567	0.55	0.154	9.33e-242
ARL6IP1	1.54e-244	0.684597	0.771	0.414	3.88e-240
CDKN2B	3.41e-244	0.689753	0.511	0.127	8.58e-240
LAMB3	4.23e-243	1.05997	0.789	0.445	1.07e-238
C4orf48	5.44e-243	0.530537	0.366	0.02	1.37e-238
TUBB4B	7.59e-243	0.820432	0.983	0.942	1.91e-238
HNRNPA2B1	1.5e-238	0.612004	0.986	0.936	3.77e-234
PSMB9	1.63e-237	0.842041	0.78	0.519	4.09e-233
CCL2	7.74e-237	2.30345	0.494	0.122	1.95e-232
H2AFX	4.14e-236	0.744516	0.691	0.325	1.04e-231
SAMD9	4.89e-236	0.755325	0.432	0.075	1.23e-231
ID2	7.59e-236	1.11103	0.733	0.387	1.91e-231
HLA-E	9.81e-236	0.668005	0.98	0.958	2.47e-231
HSP90AA1	1.63e-235	0.814888	0.999	0.998	4.1e-231
CALM1	2.01e-233	0.677714	0.988	0.968	5.06e-229
IL32	3.96e-231	1.10686	0.398	0.047	9.96e-227
HOXD11	4.97e-230	0.435529	0.329	0.005	1.25e-225
ID3	8.17e-230	1.07399	0.849	0.562	2.06e-225
PMAIP1	6.1e-229	0.968101	0.942	0.829	1.53e-224
COL7A1	4.71e-228	0.66207	0.741	0.359	1.18e-223
NFE2L1	4.5e-226	0.640979	0.694	0.363	1.13e-221
TNF	2.29e-225	0.731418	0.412	0.061	5.76e-221
MUC1	2.67e-222	0.572503	0.364	0.032	6.73e-218
TENM2	2.87e-222	0.52757	0.541	0.159	7.22e-218
JUND	3.89e-222	0.694305	0.992	0.985	9.79e-218
INHBA	1.78e-221	1.05508	0.331	0.012	4.48e-217
ACTB	3.59e-221	0.646163	0.997	0.994	9.03e-217
FRMD4B	2.05e-219	0.644744	0.71	0.367	5.17e-215
MDK	3.88e-219	0.606038	0.466	0.102	9.75e-215
PSME2	6.71e-217	1.09839	0.874	0.763	1.69e-212
MALAT1	5.61e-215	0.642269	0.998	0.998	1.41e-210
CD74	8.78e-215	3.27439	0.539	0.248	2.21e-210
STEAP4	1e-213	0.767361	0.409	0.072	2.52e-209
CBR3	2.74e-213	0.647525	0.582	0.219	6.88e-209
CEBPB	2.99e-213	0.831041	0.941	0.826	7.52e-209
GBP1	3.07e-213	1.42748	0.604	0.299	7.71e-209
MYLIP	2.09e-212	0.670564	0.643	0.284	5.25e-208
SERPINB13	4.27e-212	0.636121	0.398	0.061	1.07e-207
JUNB	1.94e-211	0.76628	0.992	0.985	4.88e-207
CXCL1	1.26e-209	1.21756	0.327	0.018	3.16e-205
BTG2	1.39e-208	1.04498	0.96	0.846	3.49e-204
GADD45A	8.11e-208	0.670324	0.753	0.401	2.04e-203
EIF2AK2	4.09e-207	0.540331	0.61	0.252	1.03e-202
MMP1	1.03e-204	1.44765	0.301	0.006	2.6e-200
PLK2	2.79e-204	0.88366	0.853	0.571	7.01e-200
WARS	4.18e-204	1.72427	0.448	0.136	1.05e-199
AREG	1.53e-203	1.05153	0.816	0.484	3.84e-199
IFIT1	2.62e-201	0.504146	0.359	0.041	6.58e-197
NAMPT	4.95e-201	0.805954	0.892	0.689	1.25e-196
MAFB	1.03e-200	0.819119	0.799	0.479	2.6e-196
CLEC7A	1.37e-199	0.376559	0.349	0.037	3.45e-195
SERTAD1	4.49e-199	0.759461	0.945	0.832	1.13e-194
CKS2	7.75e-199	0.971981	0.753	0.479	1.95e-194
AIM2	2.22e-198	0.448743	0.311	0.015	5.58e-194
SLC7A5	2.07e-197	0.572064	0.648	0.291	5.2e-193
ZFAND5	2.61e-196	0.788917	0.9	0.7	6.57e-192
RPL36AL	6.44e-196	0.488341	0.981	0.964	1.62e-191
UPP1	1.29e-195	0.867304	0.431	0.111	3.25e-191
SLC16A1	5.19e-195	0.539779	0.631	0.283	1.31e-190
GBP4	8.13e-195	0.513733	0.333	0.029	2.05e-190
RARRES3	6.19e-194	0.631248	0.475	0.14	1.56e-189
PARP9	8.97e-194	0.397692	0.428	0.096	2.26e-189
HLA-DPB1	8.73e-193	0.835373	0.43	0.115	2.2e-188
OAS1	1.01e-192	0.526554	0.445	0.112	2.53e-188
CA2	3.6e-192	1.0551	0.61	0.293	9.07e-188
AC015912.3	1.64e-191	0.467165	0.354	0.049	4.12e-187
CTSV	1.89e-191	0.514207	0.454	0.114	4.76e-187
HLA-C	5.74e-191	1.23201	0.987	0.969	1.44e-186
HLA-DQB1	1.5e-190	1.23169	0.5	0.196	3.78e-186
OAS3	9.14e-189	0.496803	0.391	0.077	2.3e-184
RSAD2	6.97e-188	0.808763	0.306	0.02	1.75e-183
TWIST1	5.74e-187	0.389709	0.269	0.001	1.44e-182
LAMA3	4.14e-186	0.853905	0.625	0.297	1.04e-181
ABCA1	1.6e-185	0.522932	0.521	0.172	4.02e-181
HSPA5	3.12e-183	0.610869	0.891	0.756	7.84e-179
APP	1.56e-182	0.593759	0.789	0.534	3.93e-178
APLP2	3.43e-182	0.575123	0.819	0.601	8.63e-178
UBE2L6	3.57e-182	0.762498	0.566	0.279	8.99e-178
IFI44	2.23e-181	0.410548	0.356	0.056	5.61e-177
AL161431.1	1e-180	0.439921	0.35	0.056	2.53e-176
SAMD9L	4.21e-180	0.390574	0.304	0.023	1.06e-175
FAM53C	1.31e-179	0.53832	0.574	0.244	3.29e-175
FLNA	1.31e-179	0.660985	0.824	0.593	3.3e-175
CXCL10	1.52e-179	1.96967	0.285	0.013	3.83e-175
AGRN	3.12e-179	0.512788	0.474	0.147	7.85e-175
CALR	7.94e-179	0.653788	0.914	0.809	2e-174
IFI35	1.19e-178	0.48847	0.464	0.136	3e-174
MX1	1.28e-178	0.74608	0.483	0.156	3.23e-174
FUS	3.01e-178	0.56775	0.964	0.9	7.57e-174
CD47	3.36e-178	0.581135	0.745	0.517	8.45e-174
ITGB4	5.35e-178	0.583388	0.804	0.524	1.35e-173
TNFAIP2	1.33e-177	0.749197	0.398	0.086	3.35e-173
FSCN1	1.51e-177	0.816476	0.789	0.551	3.79e-173
OAS2	1.2e-175	0.371459	0.334	0.046	3.03e-171
MAF	2.97e-175	0.580386	0.735	0.431	7.46e-171
STON2	1.04e-174	0.377951	0.421	0.1	2.63e-170
ASS1	1.96e-174	0.630346	0.625	0.296	4.93e-170
SOD1	5.15e-174	0.487182	0.965	0.913	1.3e-169
SNTB2	6.41e-174	0.457061	0.581	0.255	1.61e-169
HSPA1A	7.47e-174	0.761444	0.996	0.988	1.88e-169
CFH	8.9e-174	0.313577	0.256	0.002	2.24e-169
B4GALT1	9.24e-174	0.611058	0.697	0.407	2.32e-169
TAPBP	1.4e-172	0.736661	0.794	0.592	3.52e-168
LRIF1	7.56e-172	0.4442	0.447	0.132	1.9e-167
TCF4	1.16e-171	0.553681	0.636	0.324	2.91e-167
MAP1LC3B	2.79e-170	0.646395	0.905	0.75	7.01e-166
RPS21	4.72e-170	0.36678	0.994	0.997	1.19e-165
LIMA1	1.4e-169	0.525983	0.922	0.76	3.51e-165
SEM1	4.14e-169	0.518705	0.949	0.897	1.04e-164
CXCL9	5.52e-169	1.5007	0.256	0.005	1.39e-164
PPIB	2.24e-168	0.688439	0.923	0.856	5.63e-164
VMP1	1.36e-167	0.659716	0.876	0.671	3.42e-163
POU3F1	1.95e-166	0.891045	0.773	0.523	4.91e-162
RUNX1	3.43e-166	0.394967	0.485	0.158	8.63e-162
SP100	1.12e-165	0.519459	0.627	0.334	2.82e-161
TAP1	1.26e-165	0.874429	0.696	0.505	3.16e-161
LPGAT1	1.96e-165	0.363206	0.477	0.15	4.93e-161
DNAJB1	3.47e-165	0.602513	0.99	0.968	8.74e-161
IL20	7.32e-165	1.25124	0.448	0.146	1.84e-160
SLFN5	1.6e-164	0.343547	0.342	0.056	4.01e-160
SERPINH1	2.41e-164	0.673404	0.694	0.402	6.07e-160
BDKRB1	1.58e-163	0.49174	0.444	0.136	3.98e-159
MEF2A	1.77e-163	0.562053	0.701	0.382	4.45e-159
SLC15A3	2.09e-163	0.257457	0.255	0.008	5.26e-159
CXCL11	4.59e-163	0.859814	0.254	0.008	1.16e-158
MMP3	7.31e-163	0.741711	0.253	0.007	1.84e-158
PRNP	5.89e-162	0.578168	0.887	0.713	1.48e-157
IDO1	3.1e-161	1.13916	0.237	0.001	7.79e-157
GNAI2	7.1e-161	0.543169	0.811	0.609	1.79e-156
STAT2	3.99e-160	0.41356	0.445	0.137	1e-155
PKM	1.09e-159	0.961068	0.956	0.905	2.75e-155
IFI16	1.36e-159	0.544392	0.878	0.714	3.41e-155
CAV1	6.18e-158	0.594665	0.913	0.797	1.56e-153
IRF9	2.17e-157	0.413369	0.423	0.12	5.46e-153
CTSC	3.9e-157	0.717591	0.68	0.425	9.82e-153
NETO2	1.85e-156	0.284332	0.287	0.03	4.65e-152
HLA-F	4e-156	0.551697	0.756	0.531	1.01e-151
OLFM1	1.51e-155	0.390354	0.365	0.08	3.81e-151
PHLDA1	6.61e-155	0.588368	0.47	0.156	1.66e-150
LAMC2	6.76e-154	1.11967	0.52	0.241	1.7e-149
CAMK2N1	9.83e-154	0.447711	0.352	0.073	2.47e-149
DNAJA4	1.72e-153	0.701021	0.619	0.343	4.32e-149
PRSS23	8.4e-153	0.424048	0.341	0.07	2.11e-148
ADAMTS4	9.31e-153	0.499769	0.338	0.067	2.34e-148
CBX4	1.01e-152	0.499672	0.57	0.257	2.54e-148
HOTAIRM1	4.79e-152	0.367343	0.396	0.11	1.2e-147
CCDC71L	5.7e-152	0.491639	0.407	0.111	1.43e-147
MYL12B	8.02e-152	0.422213	0.981	0.975	2.02e-147
MYL12A	2.54e-151	0.492588	0.946	0.89	6.39e-147
SNX10	3.95e-151	0.261727	0.278	0.027	9.93e-147
CEMIP2	1.53e-150	0.585071	0.607	0.316	3.86e-146
LGALS1	4.93e-150	1.61222	0.402	0.118	1.24e-145
COTL1	5.79e-150	0.356913	0.355	0.081	1.46e-145
HOXB7	1.77e-149	0.258558	0.222	0.001	4.46e-145
CXCL8	2.17e-149	0.705731	0.333	0.065	5.46e-145
CARHSP1	2.75e-149	0.56712	0.581	0.327	6.93e-145
ABL2	3.91e-148	0.58381	0.384	0.112	9.85e-144
DDX60	5.59e-148	0.321967	0.301	0.045	1.41e-143
RNF145	6.49e-148	0.457705	0.699	0.417	1.63e-143
HNRNPH1	7.24e-148	0.559843	0.861	0.649	1.82e-143
DYNLL2	2.82e-147	0.441435	0.595	0.298	7.1e-143
CTSB	7.68e-147	0.717231	0.69	0.464	1.93e-142
SPINK6	1.35e-146	0.69122	0.223	0.003	3.39e-142
ADM	6.78e-146	0.72381	0.496	0.196	1.71e-141
ANXA5	1.71e-145	0.686852	0.769	0.575	4.3e-141
GBP5	2.63e-145	0.439969	0.219	0.002	6.62e-141
TENT5C	3.65e-145	0.337702	0.324	0.059	9.19e-141
HLA-DQA1	3.82e-145	0.715622	0.278	0.036	9.62e-141
BCL3	9.92e-144	0.530045	0.633	0.351	2.5e-139
SCPEP1	5.78e-143	0.447338	0.605	0.315	1.46e-138
CCM2	8.69e-143	0.37753	0.578	0.264	2.19e-138
DDX3X	2.04e-142	0.546519	0.944	0.808	5.13e-138
PSME1	1.63e-141	0.573424	0.903	0.845	4.1e-137
ADAR	2.31e-141	0.482927	0.625	0.367	5.8e-137
USP18	2.65e-141	0.280328	0.25	0.02	6.67e-137
MSRB1	2.81e-141	0.467942	0.438	0.164	7.06e-137
SGK1	6e-141	0.955577	0.854	0.625	1.51e-136
TAP2	2.63e-140	0.440662	0.47	0.193	6.62e-136
TRIM22	7.11e-140	0.318956	0.408	0.122	1.79e-135
HERC6	1.06e-139	0.280992	0.291	0.044	2.67e-135
TOB1	3.82e-139	0.538332	0.818	0.583	9.61e-135
SP110	4.01e-139	0.419329	0.442	0.159	1.01e-134
RAMP1	8.19e-139	0.358397	0.45	0.148	2.06e-134
CBX3	1.07e-138	0.579107	0.821	0.713	2.68e-134
TMEM50A	2.2e-138	0.422769	0.853	0.676	5.53e-134
CDKN1A	4.49e-138	0.651278	0.885	0.742	1.13e-133
TGFB1	8.08e-138	0.374077	0.544	0.235	2.03e-133
RAB31	3.79e-137	0.301858	0.346	0.081	9.55e-133
SEZ6L2	6.92e-137	0.295978	0.366	0.094	1.74e-132
CTNNAL1	1.99e-136	0.340038	0.7	0.319	5.01e-132
SEC61G	4.61e-136	0.526666	0.865	0.739	1.16e-131
IRF7	1.91e-135	0.355434	0.39	0.117	4.8e-131
MIDN	2.19e-135	0.614073	0.87	0.734	5.51e-131
TIMP1	5.07e-135	0.500917	0.681	0.379	1.28e-130
PCDH7	3.09e-134	0.460778	0.678	0.39	7.77e-130
SAP18	5.09e-134	0.441584	0.966	0.923	1.28e-129
PPIC	6.69e-134	0.487182	0.553	0.299	1.68e-129
SPTAN1	8.14e-134	0.461426	0.633	0.368	2.05e-129
MT2A	1.19e-133	0.799253	0.985	0.951	3e-129
NDRG1	4.42e-133	0.859514	0.838	0.701	1.11e-128
KLHDC7B	1.2e-132	0.341063	0.237	0.019	3.02e-128
HIST1H2AC	1.96e-132	0.5282	0.442	0.167	4.93e-128
BCL2L11	4.97e-132	0.322118	0.385	0.115	1.25e-127
CEBPD	5.61e-132	0.827206	0.974	0.947	1.41e-127
YBX3	6.7e-132	0.409157	0.984	0.967	1.68e-127
ATP1B1	9.34e-132	0.567544	0.576	0.295	2.35e-127
HEXIM1	1.44e-131	0.440443	0.562	0.27	3.63e-127
CFL1	2.45e-131	0.454174	0.987	0.974	6.18e-127
TMBIM6	3.41e-131	0.473978	0.926	0.878	8.58e-127
SLC38A2	5.11e-131	0.535703	0.956	0.874	1.29e-126
STK17A	7.75e-131	0.475789	0.613	0.337	1.95e-126
FADS3	1.49e-129	0.284345	0.25	0.028	3.74e-125
PLEKHA4	1.57e-129	0.364512	0.427	0.151	3.94e-125
NQO1	8.74e-129	0.527514	0.398	0.149	2.2e-124
RAC1	1.4e-128	0.729828	0.97	0.961	3.53e-124
DDX58	2.54e-128	0.341718	0.358	0.097	6.38e-124
TRIM56	3.34e-128	0.410254	0.465	0.184	8.4e-124
CD63	7.14e-128	0.550873	0.941	0.896	1.8e-123
FAM177A1	9.3e-128	0.483004	0.833	0.639	2.34e-123
MYO1B	3.84e-127	0.377598	0.426	0.163	9.66e-123
SERPINE1	1.14e-125	0.583339	0.374	0.121	2.88e-121
ACTN1	1.37e-125	0.517027	0.67	0.424	3.45e-121
S100A8	1.88e-125	1.4347	0.827	0.757	4.73e-121
KLF2	1.98e-125	0.788455	0.493	0.234	4.99e-121
HOXA7	1.11e-124	0.263533	0.32	0.076	2.79e-120
CDK2AP1	2.55e-124	0.334618	0.485	0.214	6.42e-120
SAMHD1	3.04e-124	0.259051	0.252	0.033	7.66e-120
ST14	4.03e-124	0.429841	0.596	0.333	1.01e-119
DEK	4.91e-124	0.534918	0.923	0.863	1.23e-119
ENAH	1.13e-123	0.582488	0.643	0.432	2.84e-119
SLC1A5	2.59e-123	0.407397	0.62	0.352	6.52e-119
ANTXR1	3.79e-123	0.375147	0.451	0.18	9.54e-119
ITGA3	6.42e-123	0.520862	0.658	0.425	1.62e-118
BMP2	7.03e-123	0.474889	0.451	0.188	1.77e-118
N4BP1	8.46e-123	0.403221	0.647	0.387	2.13e-118
PABPC1	2.48e-122	0.377455	0.987	0.971	6.24e-118
DCN	2.89e-122	0.885949	0.477	0.243	7.28e-118
HOMER3	3.48e-122	0.3884	0.44	0.179	8.76e-118
CYBA	3.74e-122	0.761228	0.569	0.363	9.4e-118
JPT1	4.94e-122	0.513245	0.804	0.654	1.24e-117
CDH13	1.13e-121	0.331899	0.534	0.233	2.84e-117
STOM	1.38e-121	0.450176	0.657	0.407	3.47e-117
ARGLU1	1.83e-121	0.483879	0.907	0.765	4.6e-117
TGFBI	2.2e-121	0.69784	0.651	0.388	5.54e-117
ERAP2	3.88e-121	0.342034	0.438	0.165	9.77e-117
CYTOR	8.42e-121	0.328692	0.221	0.02	2.12e-116
LTBP1	8.65e-121	0.307085	0.27	0.047	2.18e-116
C19orf66	8.77e-121	0.312083	0.412	0.147	2.21e-116
FAM129A	1.09e-120	0.334465	0.351	0.102	2.74e-116
PDLIM7	1.17e-120	0.404398	0.334	0.096	2.93e-116
SLC7A8	2.69e-120	0.333237	0.343	0.096	6.78e-116
PSMA2	2.84e-120	0.437734	0.763	0.566	7.16e-116
COL4A2	3.08e-120	0.30962	0.19	0.004	7.75e-116
BASP1	1.21e-119	0.480631	0.549	0.274	3.05e-115
HSP90B1	1.34e-119	0.5724	0.864	0.742	3.36e-115
COL1A1	5.93e-119	0.532455	0.287	0.059	1.49e-114
ARPC3	1.63e-118	0.483221	0.922	0.869	4.1e-114
ETS2	1.85e-118	0.810016	0.937	0.814	4.65e-114
HCAR2	1.91e-118	0.884029	0.505	0.275	4.8e-114
RECQL	2.04e-118	0.687155	0.533	0.266	5.14e-114
SAA1	1.04e-117	0.70011	0.35	0.097	2.61e-113
WNT3	1.14e-117	0.468834	0.436	0.178	2.87e-113
COL5A1	1.39e-117	0.250088	0.25	0.036	3.49e-113
GSDMD	4.42e-117	0.345375	0.534	0.256	1.11e-112
TBX1	5.42e-117	0.271901	0.287	0.06	1.36e-112
SPHK1	7.61e-117	0.255434	0.259	0.042	1.91e-112
SESN3	9.28e-117	0.3075	0.479	0.196	2.33e-112
PTMS	1.44e-116	0.465749	0.961	0.91	3.62e-112
SLC7A1	1.9e-116	0.451662	0.656	0.413	4.77e-112
NCS1	3.82e-116	0.282846	0.416	0.156	9.6e-112
PTBP3	4.77e-116	0.404115	0.689	0.456	1.2e-111
COL1A2	6.76e-116	0.483951	0.194	0.008	1.7e-111
MATN2	1.09e-115	0.293364	0.435	0.159	2.73e-111
FYB1	1.43e-115	0.254162	0.199	0.011	3.6e-111
LAP3	1.86e-115	0.643011	0.634	0.45	4.67e-111
MICALL2	3.53e-115	0.266184	0.332	0.092	8.89e-111
ISG20	4.91e-115	0.776823	0.443	0.211	1.23e-110
AC007952.4	9.3e-115	0.286307	0.307	0.076	2.34e-110
EPAS1	1.48e-114	0.308541	0.525	0.243	3.72e-110
NMI	3.56e-114	0.337413	0.519	0.255	8.96e-110
FNDC3B	4.7e-114	0.308869	0.409	0.15	1.18e-109
BAMBI	6.58e-114	0.278863	0.236	0.033	1.66e-109
CUX1	7.23e-114	0.417635	0.54	0.286	1.82e-109
PDP1	1.05e-113	0.331557	0.38	0.13	2.63e-109
TNFSF9	1.29e-113	0.35653	0.29	0.067	3.25e-109
SEMA3C	1.32e-113	0.261598	0.277	0.055	3.31e-109
ST5	1.64e-113	0.352133	0.411	0.15	4.12e-109
FOS	6.06e-113	0.801285	0.991	0.987	1.52e-108
AAK1	1.17e-112	0.383287	0.57	0.313	2.95e-108
SDC4	1.33e-112	0.731329	0.765	0.596	3.35e-108
STARD5	3.38e-112	0.35835	0.45	0.198	8.51e-108
NMT1	5.94e-112	0.456335	0.616	0.399	1.49e-107
CD83	1.11e-111	0.406412	0.309	0.083	2.79e-107
SPINT2	4.22e-111	0.432254	0.946	0.879	1.06e-106
FAM43A	6.51e-111	0.335303	0.288	0.068	1.64e-106
PDIA3	6.77e-111	0.532533	0.857	0.756	1.7e-106
ARL4A	7.51e-111	0.556575	0.791	0.58	1.89e-106
UGDH	7.59e-111	0.400523	0.51	0.241	1.91e-106
PPP1R15A	1.01e-110	0.494716	0.982	0.959	2.54e-106
PHACTR4	1.16e-110	0.425091	0.615	0.371	2.91e-106
GLS	2.03e-110	0.465597	0.598	0.346	5.12e-106
TUSC1	2.66e-110	0.353036	0.656	0.39	6.68e-106
PML	3.12e-110	0.413062	0.551	0.315	7.86e-106
SOX4	3.51e-110	0.628054	0.723	0.466	8.83e-106
REEP5	5.04e-109	0.434434	0.799	0.678	1.27e-104
CDKN1C	7.16e-109	0.559518	0.354	0.116	1.8e-104
ID1	1.37e-108	0.791081	0.937	0.81	3.44e-104
MSN	2.3e-108	0.475097	0.769	0.602	5.78e-104
IGFBP3	2.84e-108	0.930945	0.453	0.2	7.15e-104
PIEZO1	3.17e-108	0.317424	0.342	0.11	7.98e-104
IGFL2-AS1	5.06e-108	0.930125	0.181	0.009	1.27e-103
NABP1	6.32e-108	0.326011	0.421	0.168	1.59e-103
CCNL1	1.95e-107	0.468475	0.967	0.9	4.89e-103
TUBA1B	2.35e-107	0.616063	0.926	0.847	5.91e-103
FSTL3	7.09e-107	0.373644	0.292	0.079	1.78e-102
POLR2A	7.2e-107	0.399097	0.669	0.453	1.81e-102
C6orf62	1.89e-106	0.366265	0.588	0.334	4.76e-102
NXF1	2.07e-106	0.385314	0.557	0.299	5.22e-102
DHRS7	2.16e-106	0.328498	0.527	0.265	5.43e-102
ARPC1A	3.09e-106	0.395693	0.745	0.579	7.78e-102
OST4	1.97e-105	0.379716	0.946	0.905	4.95e-101
LBH	2.44e-105	0.260635	0.317	0.085	6.13e-101
CCL5	2.87e-105	0.794839	0.171	0.005	7.22e-101
RNF19B	6.27e-105	0.343875	0.529	0.27	1.58e-100
SNHG25	1.36e-104	0.296651	0.341	0.112	3.42e-100
POLR2L	1.9e-104	0.375027	0.96	0.923	4.77e-100
BTN3A2	2.22e-104	0.326181	0.494	0.235	5.58e-100
NCOR2	2.38e-104	0.310329	0.538	0.273	5.99e-100
PFKFB3	3.38e-104	0.314042	0.359	0.124	8.5e-100
LY6E	4.94e-104	1.19723	0.8	0.775	1.24e-99
HELZ2	4.97e-104	0.254992	0.309	0.085	1.25e-99
F3	1.92e-103	0.298913	0.253	0.05	4.84e-99
ELF3	3.22e-103	0.874571	0.455	0.225	8.1e-99
NEDD8	3.36e-103	0.462776	0.909	0.854	8.45e-99
SBNO2	8.72e-103	0.303105	0.436	0.188	2.19e-98
LAPTM4A	1.04e-102	0.414483	0.897	0.854	2.61e-98
MINOS1	2.56e-102	0.39627	0.858	0.68	6.45e-98
ASCL2	2.01e-101	0.309949	0.478	0.213	5.05e-97
SKA2	2.27e-101	0.310769	0.469	0.22	5.71e-97
DAD1	2.77e-101	0.381095	0.891	0.79	6.98e-97
IFIT2	6.84e-101	0.592164	0.182	0.013	1.72e-96
NUDT14	1.02e-100	0.257698	0.517	0.241	2.56e-96
GTF2B	1.35e-100	0.473489	0.709	0.493	3.4e-96
KRT6A	1.56e-100	1.48569	0.743	0.668	3.94e-96
TBX3	1.61e-100	0.284342	0.318	0.1	4.04e-96
IFIH1	5.41e-100	0.307362	0.374	0.139	1.36e-95
PDGFA	8.13e-100	0.297196	0.417	0.164	2.05e-95
GNAS	1.03e-99	0.508838	0.976	0.959	2.58e-95
NDUFA13	1.34e-99	0.374248	0.882	0.759	3.37e-95
GJB2	1.6e-99	0.520424	0.593	0.335	4.03e-95
S100A9	1.66e-99	1.15201	0.85	0.789	4.17e-95
GRN	6.58e-99	0.519803	0.811	0.709	1.66e-94
DNAJB4	7.4e-99	0.551832	0.687	0.472	1.86e-94
NR3C1	5.47e-98	0.362993	0.711	0.482	1.38e-93
ITPKC	5.16e-97	0.670701	0.698	0.508	1.3e-92
RPS10	9.36e-97	0.439928	0.986	0.982	2.36e-92
TIMP3	1.72e-96	0.420267	0.284	0.077	4.34e-92
NASP	2.08e-96	0.408726	0.823	0.673	5.24e-92
SIVA1	3.01e-96	0.415355	0.829	0.712	7.56e-92
PPIA	4.85e-96	0.262424	0.995	0.994	1.22e-91
TACC1	2.41e-95	0.314397	0.396	0.162	6.06e-91
SPATS2L	2.7e-95	0.446952	0.591	0.387	6.8e-91
LFNG	2.93e-95	0.27482	0.468	0.199	7.37e-91
RBBP8	3.36e-95	0.306464	0.556	0.299	8.47e-91
PMEPA1	4.3e-94	0.475916	0.648	0.435	1.08e-89
BSG	5.22e-94	0.447575	0.826	0.725	1.31e-89
ODF2L	5.36e-94	0.30077	0.511	0.263	1.35e-89
PCNA	1.02e-93	0.414132	0.621	0.411	2.56e-89
ELOC	1.05e-93	0.352036	0.837	0.701	2.64e-89
DPM3	1.31e-93	0.325989	0.564	0.33	3.31e-89
LMAN1	1.5e-93	0.389482	0.773	0.626	3.77e-89
RPL36A	2.28e-93	0.360242	0.97	0.894	5.74e-89
TXNDC17	3.83e-93	0.408314	0.903	0.829	9.64e-89
CHMP5	5.54e-93	0.385663	0.723	0.554	1.39e-88
SQSTM1	1.68e-92	0.441608	0.934	0.836	4.23e-88
BGN	1.9e-92	0.535637	0.495	0.275	4.77e-88
HAPLN3	2.56e-92	0.272926	0.346	0.126	6.43e-88
SHISA5	2.71e-92	0.359526	0.566	0.345	6.82e-88
HMGB2	5.64e-92	0.421745	0.616	0.396	1.42e-87
DLK2	6.55e-92	0.279619	0.449	0.194	1.65e-87
MORF4L1	1.06e-91	0.359443	0.87	0.765	2.68e-87
UBB	3.46e-91	0.469716	0.995	0.989	8.7e-87
EFNB2	8.77e-91	0.459701	0.656	0.432	2.21e-86
SLC5A3	9.04e-91	0.365789	0.45	0.215	2.28e-86
FGD6	2.28e-90	0.300161	0.495	0.252	5.74e-86
SEC61B	2.59e-90	0.390135	0.945	0.902	6.52e-86
RBBP6	3.06e-90	0.434237	0.733	0.545	7.7e-86
SRGN	3.15e-90	0.560406	0.178	0.018	7.94e-86
KRT8	3.19e-90	0.523337	0.361	0.139	8.02e-86
TGFBR1	4.05e-90	0.271362	0.382	0.156	1.02e-85
LAMA5	4.31e-90	0.302118	0.499	0.254	1.09e-85
ANKLE2	5.88e-90	0.380141	0.652	0.445	1.48e-85
NPC2	7.17e-90	0.420825	0.852	0.759	1.8e-85
LSR	2.5e-89	0.467145	0.567	0.39	6.28e-85
GAS6	4.23e-89	0.400591	0.702	0.469	1.06e-84
PSMB8	8.93e-89	0.463421	0.81	0.716	2.25e-84
ARF4	3.98e-88	0.397927	0.811	0.671	1e-83
MRPL33	5.16e-88	0.315186	0.683	0.476	1.3e-83
RPA3	8.75e-88	0.406369	0.632	0.455	2.2e-83
VAMP5	1.45e-87	0.302505	0.385	0.169	3.65e-83
SUMO2	2.86e-87	0.271667	0.977	0.966	7.19e-83
AKT1	3.01e-87	0.304061	0.526	0.298	7.59e-83
CHD4	3.68e-87	0.360901	0.714	0.502	9.26e-83
RAP1A	7.39e-87	0.278866	0.516	0.283	1.86e-82
ERH	9.3e-87	0.37437	0.856	0.778	2.34e-82
TAX1BP3	2.77e-86	0.321162	0.676	0.46	6.97e-82
PRKCA	1e-85	0.279396	0.352	0.14	2.52e-81
KRT18	1.27e-85	0.496659	0.419	0.193	3.19e-81
UHMK1	7.73e-85	0.301405	0.479	0.255	1.94e-80
CITED2	1.37e-84	0.353705	0.482	0.247	3.45e-80
OASL	3.46e-84	0.291804	0.201	0.035	8.71e-80
PDPN	5.01e-84	0.299149	0.372	0.155	1.26e-79
PPP2R5E	5.1e-84	0.358854	0.566	0.355	1.28e-79
DCD	8.54e-84	1.00358	0.13	0	2.15e-79
TMX1	1.08e-83	0.308904	0.535	0.327	2.71e-79
SERPINB1	1.32e-83	0.43727	0.601	0.393	3.31e-79
RGS16	1.95e-83	0.508606	0.22	0.05	4.9e-79
CLTA	2.96e-83	0.371085	0.916	0.896	7.45e-79
EGR4	4.95e-83	0.456673	0.217	0.048	1.24e-78
AP001453.2	7.83e-83	0.250634	0.278	0.09	1.97e-78
PDZK1IP1	8.31e-83	0.540092	0.479	0.283	2.09e-78
ADIRF	1.03e-82	0.454806	0.624	0.408	2.58e-78
TMEM59	1.36e-82	0.295681	0.91	0.853	3.43e-78
C7orf50	1.57e-82	0.443212	0.504	0.326	3.95e-78
CCDC80	2.75e-82	0.275385	0.193	0.033	6.91e-78
SPCS3	2.98e-82	0.325243	0.625	0.433	7.49e-78
GADD45G	4.99e-82	0.268893	0.291	0.093	1.26e-77
MKNK2	9.55e-82	0.407605	0.668	0.459	2.4e-77
MAFF	1.54e-81	0.452004	0.762	0.577	3.87e-77
EDN2	1.89e-81	0.274724	0.239	0.06	4.76e-77
ATP1A1	2.43e-81	0.368489	0.917	0.843	6.11e-77
MXD1	3.46e-81	0.459504	0.5	0.291	8.7e-77
SYNE2	6.63e-81	0.433629	0.876	0.768	1.67e-76
WDR66	7.45e-81	0.33755	0.606	0.4	1.87e-76
STK17B	9.62e-81	0.272807	0.329	0.129	2.42e-76
DDX3Y	1.08e-80	0.25748	0.288	0.096	2.72e-76
RDH10	1.63e-80	0.309306	0.33	0.13	4.1e-76
RDX	2.22e-80	0.347501	0.703	0.53	5.59e-76
CLEC2B	2.84e-80	0.499565	0.9	0.773	7.15e-76
ATP2A2	4.68e-80	0.31859	0.611	0.406	1.18e-75
MMP13	8.44e-80	0.279708	0.124	0	2.12e-75
GNLY	1.11e-79	0.588289	0.13	0.003	2.79e-75
LGALS3BP	1.12e-79	0.92792	0.523	0.401	2.83e-75
PER3	1.71e-79	0.288116	0.474	0.244	4.31e-75
NCOA3	5.35e-79	0.276796	0.482	0.263	1.35e-74
CST3	6.12e-79	1.20405	0.815	0.768	1.54e-74
GALNT6	7.88e-79	0.282729	0.278	0.096	1.98e-74
UGCG	1.04e-78	0.35753	0.502	0.288	2.63e-74
MAP4	1.31e-78	0.401882	0.688	0.535	3.28e-74
UBL5	1.49e-78	0.303954	0.962	0.921	3.74e-74
MCUB	1.84e-78	0.257118	0.457	0.241	4.63e-74
SNRPG	2.08e-78	0.319093	0.915	0.838	5.23e-74
DST	2.53e-78	0.404108	0.979	0.892	6.37e-74
CXCL2	6.02e-78	0.323989	0.378	0.161	1.52e-73
TLE4	1.05e-77	0.452899	0.714	0.542	2.65e-73
LITAF	1.39e-77	0.352895	0.656	0.469	3.5e-73
FXYD5	1.43e-77	0.423126	0.463	0.263	3.59e-73
ETV7	2.47e-77	0.255203	0.349	0.147	6.2e-73
PYGL	5.98e-77	0.269735	0.503	0.281	1.5e-72
PLEC	8.79e-77	0.518436	0.741	0.607	2.21e-72
IGFBP6	1.09e-76	0.509901	0.237	0.066	2.74e-72
NDFIP1	1.37e-76	0.286352	0.666	0.461	3.44e-72
ATP6V0E1	2.82e-76	0.333258	0.873	0.811	7.1e-72
CNPY2	3.33e-76	0.300078	0.663	0.465	8.37e-72
HIF1A	3.43e-76	0.337299	0.609	0.401	8.64e-72
NFIA	1.5e-75	0.339871	0.649	0.446	3.76e-71
PDIA6	2.97e-75	0.437573	0.765	0.656	7.48e-71
MVP	5.17e-75	0.261209	0.48	0.261	1.3e-70
EMP3	7.91e-75	0.658865	0.431	0.245	1.99e-70
OAZ1	8.11e-75	0.257475	0.983	0.976	2.04e-70
ACTR2	2.28e-74	0.323347	0.743	0.572	5.73e-70
IFFO2	1.8e-73	0.46027	0.688	0.504	4.52e-69
THBS1	3.72e-73	0.263179	0.198	0.043	9.36e-69
SERPINE2	4.07e-73	0.257153	0.183	0.035	1.02e-68
PGP	4.53e-73	0.261264	0.455	0.253	1.14e-68
CHURC1	5.43e-73	0.303573	0.829	0.697	1.37e-68
FOSL2	6.95e-73	0.313717	0.598	0.381	1.75e-68
PSMA5	9.14e-73	0.356309	0.746	0.634	2.3e-68
ATP6V1G1	1.27e-72	0.292068	0.939	0.897	3.21e-68
SNHG12	2.57e-72	0.44928	0.65	0.446	6.46e-68
SLC6A8	2.65e-72	0.33251	0.518	0.311	6.68e-68
CAPNS1	3.38e-72	0.334351	0.537	0.346	8.52e-68
IER5	3.96e-72	0.489368	0.844	0.747	9.97e-68
LGMN	8.49e-72	0.266595	0.406	0.204	2.14e-67
IL6ST	9.61e-72	0.294976	0.572	0.355	2.42e-67
BCAM	1.23e-71	0.380182	0.569	0.359	3.09e-67
CD14	1.36e-71	0.287215	0.219	0.058	3.42e-67
IGFL1	1.59e-71	0.428044	0.157	0.022	3.99e-67
UBE2Q1	1.74e-71	0.259017	0.564	0.341	4.37e-67
CARD19	3.22e-71	0.31358	0.576	0.37	8.11e-67
KDELR2	6.06e-71	0.34724	0.645	0.486	1.52e-66
LIMS1	1.53e-70	0.326205	0.635	0.454	3.85e-66
TCHH	2.53e-70	0.309242	0.142	0.015	6.37e-66
HMGN2	3.23e-70	0.416452	0.899	0.861	8.12e-66
HSBP1L1	4.03e-70	0.292375	0.621	0.429	1.01e-65
RAB3IP	4.47e-70	0.264169	0.339	0.15	1.12e-65
CAVIN3	7.35e-70	0.325663	0.409	0.217	1.85e-65
NRIP1	7.47e-70	0.258099	0.391	0.189	1.88e-65
NDUFB1	2.65e-69	0.355952	0.84	0.749	6.66e-65
ZNFX1	7.49e-69	0.261524	0.385	0.191	1.89e-64
DDT	1.03e-68	0.397692	0.86	0.797	2.59e-64
TFDP1	1.65e-68	0.269554	0.5	0.31	4.16e-64
GNB2	1.71e-68	0.375947	0.779	0.68	4.29e-64
ERO1A	2.24e-68	0.42499	0.408	0.225	5.64e-64
TNFAIP3	3.41e-68	0.630624	0.825	0.675	8.58e-64
PHPT1	6.04e-68	0.29804	0.91	0.848	1.52e-63
FBXO32	8.98e-68	0.377771	0.422	0.212	2.26e-63
DYNLT1	2.18e-67	0.300585	0.769	0.625	5.47e-63
FERMT1	2.2e-67	0.353439	0.704	0.54	5.53e-63
RRBP1	2.55e-67	0.328028	0.685	0.512	6.43e-63
FAM133B	2.67e-67	0.325528	0.873	0.747	6.71e-63
SLC2A4RG	6.45e-67	0.323449	0.732	0.597	1.62e-62
OCIAD2	7.43e-67	0.290051	0.741	0.572	1.87e-62
VIM	1.12e-66	0.687795	0.377	0.181	2.82e-62
TPM2	1.15e-66	0.846207	0.27	0.114	2.88e-62
SOWAHC	1.25e-66	0.331162	0.645	0.438	3.14e-62
RPN1	2.2e-66	0.295121	0.457	0.27	5.53e-62
LIMCH1	3.2e-66	0.285648	0.308	0.138	8.05e-62
WDR34	1.86e-65	0.271794	0.407	0.219	4.68e-61
CDC26	3.96e-65	0.262641	0.646	0.457	9.96e-61
PSMB2	5.4e-65	0.403438	0.758	0.671	1.36e-60
LCE3D	6.61e-65	0.479415	0.121	0.009	1.66e-60
MAP4K4	6.69e-65	0.335608	0.458	0.27	1.68e-60
TENT5A	1.08e-64	0.314019	0.53	0.322	2.71e-60
ADRB2	1.79e-64	0.443808	0.694	0.49	4.52e-60
KLF4	2.06e-64	0.533914	0.925	0.857	5.18e-60
RRAD	5.1e-64	0.428478	0.124	0.011	1.28e-59
CD46	6.92e-64	0.255578	0.621	0.405	1.74e-59
AL445524.1	7.99e-64	0.387371	0.503	0.309	2.01e-59
SMIM14	3.09e-63	0.277395	0.547	0.354	7.76e-59
ERP44	3.61e-63	0.269469	0.551	0.369	9.08e-59
ARHGAP5	4.45e-63	0.272443	0.638	0.432	1.12e-58
PRDX5	6.89e-63	0.406355	0.924	0.904	1.73e-58
CCL7	1.41e-62	0.438146	0.101	0.001	3.54e-58
ANXA1	1.53e-62	0.74303	0.949	0.941	3.86e-58
PAK2	2.16e-62	0.290302	0.736	0.568	5.42e-58
CIB1	2.35e-62	0.258992	0.738	0.583	5.92e-58
ITGAV	5.97e-62	0.288795	0.571	0.379	1.5e-57
SLC20A1	6.19e-62	0.328324	0.62	0.415	1.56e-57
PRRC2B	7.6e-62	0.261201	0.591	0.39	1.91e-57
SLIRP	8.08e-62	0.352442	0.848	0.748	2.03e-57
NORAD	1.17e-61	0.298811	0.717	0.551	2.95e-57
FXYD3	1.79e-61	0.429703	0.963	0.948	4.52e-57
COL16A1	3.75e-61	0.277916	0.37	0.191	9.45e-57
RND3	7.14e-61	0.402776	0.934	0.839	1.8e-56
RABL6	1.98e-60	0.329616	0.533	0.367	4.97e-56
POLE4	2.6e-60	0.276517	0.625	0.464	6.54e-56
H2AFJ	4.28e-60	0.337747	0.705	0.578	1.08e-55
PLEK2	6.52e-60	0.307423	0.578	0.381	1.64e-55
SNHG9	1.06e-59	0.256646	0.492	0.305	2.68e-55
IRX2	1.36e-59	0.507862	0.825	0.717	3.42e-55
RRAS	2.42e-59	0.254994	0.595	0.402	6.09e-55
MESD	4.77e-59	0.311026	0.604	0.445	1.2e-54
PTGFRN	5.77e-59	0.287435	0.529	0.344	1.45e-54
IER3	1.32e-58	0.437144	0.934	0.863	3.32e-54
TMA7	1.47e-58	0.264696	0.983	0.966	3.7e-54
NDUFA4	1.9e-58	0.313653	0.967	0.967	4.77e-54
GUK1	2.53e-58	0.380649	0.972	0.951	6.36e-54
ZFP36	6.39e-58	0.61558	0.951	0.917	1.61e-53
TNNT1	8.09e-58	0.310293	0.345	0.176	2.04e-53
IL7R	3.07e-57	0.262343	0.117	0.012	7.72e-53
IVNS1ABP	5.12e-57	0.385701	0.721	0.546	1.29e-52
TRA2A	5.42e-57	0.290488	0.756	0.578	1.36e-52
GABPB1-AS1	6.91e-57	0.260014	0.514	0.329	1.74e-52
SRSF5	8.2e-57	0.310148	0.902	0.804	2.06e-52
METRNL	1.25e-56	0.325901	0.422	0.247	3.13e-52
HBEGF	1.36e-56	0.591528	0.762	0.636	3.41e-52
UPF3A	1.5e-56	0.262088	0.731	0.575	3.77e-52
TMED10	2.79e-56	0.356927	0.754	0.663	7.03e-52
YWHAG	3.88e-56	0.295086	0.732	0.583	9.77e-52
P3H2	4.89e-56	0.315254	0.416	0.241	1.23e-51
ELL2	7.02e-56	0.328082	0.569	0.378	1.77e-51
TAX1BP1	7.07e-56	0.331606	0.794	0.71	1.78e-51
SELENOK	1.19e-55	0.34876	0.826	0.71	3e-51
RBCK1	1.21e-55	0.270857	0.63	0.477	3.04e-51
AES	1.31e-55	0.269847	0.866	0.76	3.28e-51
MYL9	1.41e-55	0.288433	0.163	0.039	3.54e-51
ZFAND2A	4.56e-55	0.601086	0.688	0.563	1.15e-50
HES1	7.59e-55	0.757723	0.856	0.77	1.91e-50
LAMP2	1.47e-54	0.287153	0.679	0.543	3.7e-50
NRP2	2.86e-54	0.25717	0.417	0.23	7.2e-50
IFRD1	4.64e-54	0.364234	0.766	0.592	1.17e-49
FGFR2	7.52e-54	0.310716	0.446	0.28	1.89e-49
UBE2B	1.27e-53	0.364071	0.898	0.806	3.19e-49
PLAU	3.34e-53	0.360762	0.443	0.261	8.41e-49
REL	4.92e-53	0.431427	0.918	0.822	1.24e-48
TAOK3	6.4e-53	0.268803	0.564	0.395	1.61e-48
SNHG7	1.69e-52	0.325728	0.808	0.695	4.24e-48
C16orf74	1.99e-52	0.257135	0.304	0.149	5e-48
PLK3	2.13e-52	0.420107	0.713	0.572	5.35e-48
JDP2	3.38e-52	0.290502	0.522	0.33	8.51e-48
UAP1	5.85e-52	0.32608	0.559	0.374	1.47e-47
YWHAH	8.54e-52	0.251461	0.672	0.49	2.15e-47
HSPB1	9.88e-52	0.554991	0.981	0.986	2.48e-47
BHLHE40	1.27e-51	0.305632	0.733	0.556	3.2e-47
TP63	1.32e-51	0.325516	0.741	0.579	3.32e-47
TPI1	1.47e-51	0.440504	0.934	0.917	3.71e-47
PNRC1	2.72e-51	0.620858	0.968	0.951	6.83e-47
NEAT1	6.65e-51	0.507504	0.99	0.985	1.67e-46
SIRT1	2.06e-50	0.262143	0.329	0.175	5.18e-46
PPP1R10	2.34e-50	0.306307	0.674	0.492	5.88e-46
KRT17	2.36e-50	0.257258	0.838	0.806	5.93e-46
PHLDB2	1.52e-49	0.325311	0.548	0.362	3.83e-45
WTAP	1.81e-49	0.375278	0.746	0.595	4.54e-45
TPM3	5.86e-49	0.339325	0.853	0.797	1.48e-44
NR4A3	5.96e-49	0.273132	0.239	0.101	1.5e-44
RAB21	1.58e-48	0.263183	0.654	0.476	3.97e-44
RALA	2.17e-48	0.267027	0.683	0.561	5.46e-44
KCNQ1OT1	2.97e-48	0.858679	0.349	0.211	7.47e-44
BIRC3	7.91e-48	0.519786	0.32	0.171	1.99e-43
FTL	3.31e-47	0.355506	0.987	0.992	8.34e-43
RAB5IF	3.67e-47	0.291939	0.659	0.537	9.24e-43
PTTG1	7.24e-47	0.331027	0.465	0.318	1.82e-42
RGS1	7.39e-47	0.269425	0.124	0.025	1.86e-42
ATP5MF	7.73e-47	0.369224	0.919	0.904	1.94e-42
RAP1B	7.93e-47	0.251265	0.745	0.616	2e-42
SLC2A1	9.39e-47	0.474521	0.793	0.688	2.36e-42
NOSIP	1.01e-46	0.274274	0.586	0.441	2.55e-42
PSMA7	2.08e-46	0.295837	0.964	0.954	5.23e-42
CNDP2	2.46e-46	0.256034	0.437	0.29	6.18e-42
SLC6A6	7.17e-46	0.27682	0.397	0.24	1.81e-41
PSMA3	7.22e-46	0.290019	0.799	0.74	1.82e-41
MT1A	1.39e-45	0.984272	0.109	0.019	3.49e-41
ATP6V1E1	2.38e-45	0.288683	0.619	0.509	5.99e-41
CANX	3.67e-45	0.292459	0.75	0.645	9.22e-41
H2AFZ	5.63e-45	0.353348	0.943	0.888	1.42e-40
EIF5	2.96e-44	0.260703	0.951	0.909	7.44e-40
H2AFV	3.22e-44	0.252948	0.757	0.645	8.11e-40
TGIF1	4.82e-44	0.376655	0.698	0.549	1.21e-39
PSMC6	1.91e-43	0.267798	0.717	0.601	4.81e-39
DNMT1	7.29e-43	0.276326	0.484	0.349	1.83e-38
IER2	9.49e-43	0.332527	0.988	0.978	2.39e-38
CSRNP1	1.37e-42	0.285463	0.701	0.542	3.44e-38
ARC	2.57e-42	0.259449	0.233	0.104	6.47e-38
PSMA4	2.69e-42	0.259512	0.829	0.784	6.76e-38
HERPUD1	5.19e-42	0.302791	0.757	0.625	1.31e-37
HLA-A	9.41e-42	0.83093	0.992	0.99	2.37e-37
NUCKS1	3.36e-41	0.27913	0.938	0.914	8.44e-37
CKB	3.98e-41	0.273079	0.777	0.628	1e-36
PSMB7	5.12e-41	0.346208	0.822	0.801	1.29e-36
ARPC5	6.08e-41	0.250393	0.814	0.731	1.53e-36
MYH9	1.33e-40	0.338836	0.675	0.568	3.36e-36
DUSP2	7.24e-40	0.576619	0.74	0.672	1.82e-35
TUBA1C	1.34e-39	0.380954	0.895	0.856	3.37e-35
EREG	1.63e-39	0.262493	0.113	0.026	4.11e-35
PSMG3	2.27e-39	0.27629	0.551	0.443	5.72e-35
SERINC2	2.51e-39	0.258737	0.342	0.208	6.31e-35
GOLGB1	4.36e-39	0.311094	0.828	0.731	1.1e-34
MIR22HG	3.35e-38	0.384134	0.598	0.454	8.43e-34
ATP5IF1	2.59e-37	0.26071	0.925	0.884	6.51e-33
CXCR4	2.6e-37	0.300004	0.109	0.026	6.54e-33
PARP1	7.57e-37	0.287087	0.578	0.47	1.9e-32
EIF4A2	9.02e-37	0.259889	0.929	0.866	2.27e-32
ATP5F1E	3.01e-36	0.290168	0.989	0.983	7.58e-32
CD99	4.32e-36	0.259936	0.811	0.727	1.09e-31
RPN2	5.89e-36	0.365859	0.667	0.603	1.48e-31
GBP2	7.48e-36	0.309855	0.531	0.407	1.88e-31
SERF2	4.96e-35	0.27965	0.99	0.989	1.25e-30
SRSF7	1.06e-34	0.286072	0.949	0.899	2.68e-30
FLNB	5.02e-34	0.288597	0.474	0.355	1.26e-29
BAIAP2	1.15e-33	0.276289	0.694	0.574	2.89e-29
NR4A1	1.42e-33	0.430893	0.915	0.875	3.58e-29
TIPARP	4.65e-33	0.425017	0.76	0.662	1.17e-28
PLIN2	6.18e-33	0.37035	0.595	0.447	1.55e-28
ATP6V1D	2.18e-31	0.27824	0.654	0.553	5.49e-27
CCL20	9.98e-31	0.506352	0.239	0.129	2.51e-26
RSRP1	3.05e-30	0.308229	0.888	0.81	7.68e-26
FOXQ1	1.07e-29	0.32495	0.418	0.296	2.68e-25
CREM	1.56e-29	0.268185	0.296	0.18	3.93e-25
CYCS	1.6e-29	0.281956	0.911	0.886	4.03e-25
SERPINB3	2.54e-29	0.443861	0.165	0.075	6.4e-25
ARPC5L	9.46e-29	0.274088	0.779	0.735	2.38e-24
TRIB1	3.8e-28	0.264389	0.588	0.469	9.56e-24
CENPX	1.06e-27	0.257667	0.679	0.596	2.67e-23
TAGLN	6.56e-27	0.472631	0.113	0.04	1.65e-22
MT1M	3.34e-26	1.3004	0.369	0.273	8.4e-22
PFN1	3.47e-26	0.262005	0.959	0.932	8.72e-22
CYLD	8.84e-26	0.260437	0.566	0.45	2.22e-21
PHLDA2	1.74e-25	0.500862	0.758	0.724	4.39e-21
TSC22D3	1.26e-24	0.319505	0.543	0.408	3.18e-20
MIR222HG	1.27e-24	0.25886	0.431	0.306	3.19e-20
S100A10	4.29e-22	0.663731	0.986	0.982	1.08e-17
S100A2	2.49e-21	0.349696	0.99	0.973	6.27e-17
SPRR2D	5.57e-21	0.358402	0.228	0.137	1.4e-16
FABP7	2.19e-20	0.484773	0.149	0.08	5.5e-16
HIST1H4C	6.02e-20	0.68359	0.938	0.936	1.51e-15
TACSTD2	9.22e-20	0.419798	0.84	0.84	2.32e-15
RGCC	3.32e-19	0.287434	0.387	0.281	8.34e-15
LTF	3.38e-18	0.671649	0.197	0.119	8.5e-14
S100A11	3.25e-17	0.381856	0.993	0.989	8.18e-13
ARPC2	1.24e-16	0.251201	0.968	0.965	3.12e-12
P4HB	1.95e-16	0.296418	0.857	0.857	4.9e-12
HPGD	2.78e-16	0.346669	0.212	0.141	7e-12
KLF6	1.31e-15	0.344002	0.946	0.918	3.29e-11
CXADR	1.41e-15	0.272352	0.797	0.754	3.55e-11
EFNA1	1.28e-14	0.332638	0.691	0.684	3.22e-10
BAG3	2.78e-14	0.254213	0.671	0.591	6.99e-10
PGK1	3.67e-14	0.266291	0.82	0.811	9.23e-10
S100A6	3.09e-12	0.653682	0.938	0.944	7.77e-08
IL1R2	3.46e-12	0.460576	0.402	0.344	8.71e-08
ID4	1.15e-10	0.290139	0.37	0.325	2.9e-06
S100A7	3.16e-08	0.532333	0.508	0.47	0.000793847
MYC	3.91e-08	0.34979	0.84	0.806	0.000983782

[truncated: 14 more sheets: Supplementary file 1k, Supplementary file 1l, Supplementary file 1m, Supplementary file 1n, Supplementary file 1o, Supplementary file 1p, Supplementary file 1q, Supplementary file 1r, Supplementary file 1s, Supplementary file 1t, Supplementary file 1u, Supplementary file 1x, Supplementary file 1y, Supplementary file 1z]
