# Supplementary material for: Single-cell sequencing highlights heterogeneity and malignant progression in actinic keratosis and cutaneous squamous cell carcinoma
Source: eLife journal article supplement (doi:10.7554/elife.85270), 2023-12-15
Supplement: supp1 [file supplementary file 1w.xlsx]

## Sheet: Basal1
	p_val	avg_log2FC	pct.1	pct.2	p_val_adj	gene
MA1633.1	3.03583e-307	3.30461	0.965	0.367	1.92168e-304	BACH1
MA0861.1	0	2.63367	0.982	0.288	0	TP73
MA0525.2	0	2.34082	0.961	0.297	0	TP63
MA0106.3	0	1.86545	0.98	0.295	0	TP53
MA0496.3	0	1.84678	0.943	0.381	0	MAFK
MA0745.2	4.90721e-281	1.80125	0.862	0.416	3.10626e-278	SNAI2
MA1559.1	1.16079e-282	1.79024	0.865	0.417	7.34781e-280	SNAI3
MA1558.1	2.51103e-277	1.74581	0.868	0.419	1.58948e-274	SNAI1
MA1517.1	0	1.52095	0.849	0.375	3.85231e-308	KLF6
MA0820.1	1.28911e-267	1.49811	0.861	0.393	8.16009e-265	FIGLA
MA1516.1	0	1.47643	0.869	0.365	0	KLF3
MA0119.1	0	1.4703	0.894	0.405	0	NFIC::TLX1
MA1105.2	3.68305e-288	1.44611	0.886	0.36	2.33137e-285	GRHL2
MA0647.1	3.60937e-216	1.41027	0.824	0.383	2.28473e-213	GRHL1
MA0103.3	5.40466e-286	1.4102	0.901	0.385	3.42115e-283	ZEB1
MA0821.1	4.11862e-132	1.39386	0.711	0.4	2.60709e-129	HES5
MA0830.2	4.82892e-237	1.39057	0.864	0.413	3.0567e-234	TCF4
MA1648.1	1.10338e-232	1.38376	0.851	0.417	6.98442e-230	TCF12(var.2)
MA1631.1	1.19311e-256	1.38012	0.871	0.403	7.55237e-254	ASCL1(var.2)
MA1527.1	0	1.37933	0.911	0.404	0	NFIC(var.2)
MA0522.3	3.48165e-215	1.33902	0.838	0.423	2.20388e-212	TCF3
MA1515.1	0	1.32538	0.852	0.373	0	KLF2
MA0801.1	1.02172e-175	1.3045	0.799	0.426	6.4675e-173	MGA
MA0803.1	1.02172e-175	1.3045	0.799	0.426	6.4675e-173	TBX15
MA1141.1	0	1.2955	0.974	0.332	0	FOS::JUND
MA0829.2	2.78488e-153	1.26156	0.736	0.408	1.76283e-150	SREBF1(var.2)
MA0903.1	5.14611e-197	1.23465	0.796	0.397	3.25749e-194	HOXB3
MA0805.1	1.01565e-158	1.22239	0.765	0.429	6.42909e-156	TBX1
MA0806.1	7.74694e-157	1.18993	0.793	0.427	4.90381e-154	TBX4
MA0807.1	7.74694e-157	1.18993	0.793	0.427	4.90381e-154	TBX5
MA1587.1	1.6883e-225	1.1871	0.789	0.375	1.06869e-222	ZNF135
MA0661.1	2.21572e-175	1.1744	0.787	0.411	1.40255e-172	MEOX1
MA0499.2	1.46064e-188	1.15808	0.811	0.419	9.24588e-186	MYOD1
MA0882.1	6.1761e-160	1.10044	0.758	0.414	3.90947e-157	DLX6
MA0650.2	1.61582e-167	1.07278	0.77	0.41	1.02282e-164	HOXA13
MA0038.2	2.12689e-204	1.05557	0.801	0.416	1.34632e-201	GFI1
MA1113.2	3.66082e-183	1.05381	0.779	0.396	2.3173e-180	PBX2
MA0812.1	1.46151e-249	1.0505	0.871	0.393	9.25136e-247	TFAP2B(var.2)
MA1547.1	1.75021e-179	1.04972	0.767	0.408	1.10788e-176	PITX2
MA0719.1	1.4422e-179	1.04638	0.776	0.408	9.12914e-177	RHOXF1
MA0079.4	2.77923e-200	1.04336	0.775	0.402	1.75925e-197	SP1
MA0722.1	1.79218e-158	1.03899	0.766	0.414	1.13445e-155	VAX1
MA0723.1	1.79218e-158	1.03899	0.766	0.414	1.13445e-155	VAX2
MA0822.1	1.32087e-138	1.03469	0.725	0.402	8.36111e-136	HES7
MA0886.1	1.23653e-158	1.03443	0.776	0.412	7.82724e-156	EMX2
MA1566.1	1.24507e-134	1.01872	0.755	0.434	7.88127e-132	TBX3
MA1596.1	7.03332e-250	1.01801	0.806	0.38	4.45209e-247	ZNF460
MA0893.2	3.53e-169	1.01515	0.77	0.408	2.23449e-166	GSX2
MA0644.1	7.61976e-152	1.0109	0.758	0.402	4.82331e-149	ESX1
MA0658.1	1.45534e-137	1.00871	0.752	0.417	9.21228e-135	LHX6
MA0132.2	1.87294e-154	1.00785	0.766	0.405	1.18557e-151	PDX1
MA1481.1	1.87294e-154	1.00785	0.766	0.405	1.18557e-151	DRGX
MA1643.1	0	1.00505	0.926	0.395	0	NFIB
MA1565.1	6.08136e-148	1.00201	0.758	0.433	3.8495e-145	TBX18
MA0666.1	1.49888e-112	0.994566	0.71	0.433	9.48794e-110	MSX1
MA0708.1	1.49888e-112	0.994566	0.71	0.433	9.48794e-110	MSX2
MA0876.1	1.49888e-112	0.994566	0.71	0.433	9.48794e-110	BSX
MA0712.2	2.47417e-168	0.988964	0.765	0.409	1.56615e-165	OTX2
MA1567.1	3.85338e-124	0.986456	0.743	0.438	2.43919e-121	TBX6
MA0513.1	4.48649e-191	0.986314	0.812	0.418	2.83995e-188	SMAD2::SMAD3::SMAD4
MA1511.1	9.07465e-177	0.980622	0.774	0.407	5.74425e-174	KLF10
MA0894.1	2.7132e-134	0.962843	0.74	0.408	1.71745e-131	HESX1
MA1107.2	3.29304e-206	0.961126	0.781	0.401	2.08449e-203	KLF9
MA1656.1	6.16455e-197	0.957581	0.822	0.416	3.90216e-194	ZNF449
MA0654.1	6.42243e-126	0.95579	0.731	0.421	4.0654e-123	ISX
MA0701.2	6.42243e-126	0.95579	0.731	0.421	4.0654e-123	LHX9
MA0814.2	1.19777e-241	0.954843	0.873	0.385	7.58192e-239	TFAP2C(var.2)
MA0706.1	3.38521e-169	0.947345	0.79	0.407	2.14284e-166	MEOX2
MA1463.1	2.5724e-127	0.946805	0.736	0.413	1.62833e-124	ARGFX
MA0675.1	8.38512e-141	0.941127	0.735	0.404	5.30778e-138	NKX6-2
MA0743.2	3.35676e-157	0.936372	0.785	0.413	2.12483e-154	SCRT1
MA0699.1	1.6365e-119	0.936279	0.717	0.414	1.03591e-116	LBX2
MA1528.1	3.35818e-303	0.928387	0.908	0.389	2.12573e-300	NFIX(var.2)
MA1505.1	1.63608e-98	0.925187	0.688	0.424	1.03564e-95	HOXC8
MA1519.1	1.43236e-123	0.920615	0.738	0.413	9.06686e-121	LHX5
MA0912.2	6.73665e-135	0.916973	0.745	0.424	4.2643e-132	HOXD3
MA0703.2	2.20103e-131	0.912691	0.724	0.406	1.39325e-128	LMX1B
MA0671.1	2.68102e-192	0.906979	0.824	0.408	1.69708e-189	NFIX
MA1495.1	7.0327e-112	0.899988	0.714	0.429	4.4517e-109	HOXA1
MA0900.2	7.0327e-112	0.899988	0.714	0.429	4.4517e-109	HOXA2
MA0682.2	6.01091e-136	0.898808	0.731	0.428	3.80491e-133	PITX1
MA0725.1	1.79091e-150	0.897575	0.768	0.413	1.13364e-147	VSX1
MA0913.2	1.18479e-148	0.89524	0.762	0.414	7.49973e-146	HOXD9
MA0726.1	2.69299e-135	0.890918	0.741	0.42	1.70466e-132	VSX2
MA1569.1	3.41761e-211	0.8876	0.839	0.402	2.16335e-208	TFAP2E
MA0145.3	2.59927e-136	0.886305	0.746	0.412	1.64534e-133	TFCP2
MA0612.2	7.46308e-113	0.877438	0.725	0.418	4.72413e-110	EMX1
MA1518.1	9.06847e-112	0.876144	0.704	0.432	5.74034e-109	LHX1
MA0702.2	2.35656e-135	0.875268	0.738	0.399	1.4917e-132	LMX1A
MA0887.1	1.39858e-122	0.86936	0.739	0.412	8.85299e-120	EVX1
MA0889.1	1.09635e-100	0.866218	0.706	0.429	6.93992e-98	GBX1
MA0700.2	4.88175e-116	0.862999	0.707	0.419	3.09015e-113	LHX2
MA0628.1	4.66148e-93	0.862024	0.68	0.437	2.95072e-90	POU6F1
MA0888.1	6.40263e-114	0.861476	0.73	0.423	4.05286e-111	EVX2
MA1501.1	4.95547e-124	0.861314	0.737	0.415	3.13682e-121	HOXB7
MA0718.1	7.41575e-122	0.858667	0.719	0.428	4.69417e-119	RAX
MA0899.1	1.5238e-146	0.858554	0.758	0.414	9.64565e-144	HOXA10
MA1640.1	3.3599e-161	0.858554	0.768	0.412	2.12682e-158	MEIS2(var.2)
MA0130.1	3.12849e-197	0.856318	0.792	0.404	1.98033e-194	ZNF354C
MA0716.1	1.31702e-112	0.854232	0.7	0.423	8.33674e-110	PRRX1
MA0721.1	1.31702e-112	0.854232	0.7	0.423	8.33674e-110	UNCX
MA1497.1	9.04385e-130	0.853182	0.742	0.413	5.72476e-127	HOXA6
MA0901.2	2.39014e-153	0.84236	0.749	0.405	1.51296e-150	HOXB13
MA0027.2	2.99762e-102	0.838431	0.706	0.419	1.8975e-99	EN1
MA0662.1	2.78785e-98	0.83143	0.687	0.426	1.76471e-95	MIXL1
MA0890.1	3.11724e-113	0.826773	0.713	0.424	1.97321e-110	GBX2
MA0161.2	1.92812e-242	0.823507	0.866	0.397	1.2205e-239	NFIC
MA0674.1	8.36971e-125	0.823251	0.738	0.417	5.29803e-122	NKX6-1
MA1473.1	1.36399e-138	0.822465	0.741	0.416	8.63404e-136	CDX4
MA0791.1	7.85471e-125	0.808845	0.716	0.416	4.97203e-122	POU4F3
MA0892.1	1.13977e-119	0.799519	0.744	0.417	7.21476e-117	GSX1
MA0744.2	1.07106e-118	0.798487	0.722	0.422	6.77982e-116	SCRT2
MA0738.1	7.18764e-154	0.798472	0.766	0.418	4.54978e-151	HIC2
MA1118.1	2.76732e-105	0.7857	0.696	0.431	1.75171e-102	SIX1
MA0618.1	7.72203e-108	0.782092	0.695	0.42	4.88804e-105	LBX1
MA1119.1	1.27588e-133	0.780772	0.713	0.427	8.07633e-131	SIX2
MA0902.2	5.27393e-125	0.777375	0.723	0.416	3.3384e-122	HOXB2
MA0075.3	1.10394e-109	0.777256	0.705	0.425	6.98794e-107	PRRX2
MA1476.1	6.73374e-100	0.776488	0.697	0.433	4.26246e-97	DLX5
MA1577.1	2.7719e-91	0.773857	0.69	0.432	1.75461e-88	TLX2
MA0811.1	5.62206e-229	0.772525	0.873	0.378	3.55876e-226	TFAP2B
MA0630.1	8.53442e-91	0.766366	0.684	0.429	5.40229e-88	SHOX
MA0717.1	8.53442e-91	0.766366	0.684	0.429	5.40229e-88	RAX2
MA0642.1	2.76659e-87	0.76489	0.697	0.43	1.75125e-84	EN2
MA0904.2	1.25292e-81	0.758676	0.667	0.445	7.93099e-79	HOXB5
MA0878.2	5.02233e-118	0.756054	0.725	0.425	3.17913e-115	CDX1
MA0810.1	6.87637e-199	0.75447	0.85	0.396	4.35274e-196	TFAP2A(var.2)
MA0790.1	2.07652e-111	0.754079	0.715	0.429	1.31444e-108	POU4F1
MA0707.1	1.28887e-110	0.752404	0.689	0.428	8.15852e-108	MNX1
MA1581.1	1.48412e-145	0.749898	0.742	0.421	9.39447e-143	ZBTB6
MA0046.2	1.28568e-117	0.745596	0.706	0.425	8.13833e-115	HNF1A
MA0003.4	1.50344e-243	0.743737	0.883	0.371	9.51675e-241	TFAP2A
MA1106.1	2.17829e-76	0.742239	0.667	0.445	1.37886e-73	HIF1A
MA0068.2	6.31316e-92	0.741614	0.706	0.43	3.99623e-89	PAX4
MA0524.2	2.89657e-226	0.74091	0.874	0.374	1.83353e-223	TFAP2C
MA0710.1	5.09742e-87	0.73689	0.695	0.428	3.22667e-84	NOTO
MA0039.4	1.58426e-152	0.736347	0.757	0.414	1.00284e-149	KLF4
MA0158.2	2.06048e-97	0.727717	0.694	0.429	1.30429e-94	HOXA5
MA1563.1	8.42896e-102	0.724552	0.719	0.429	5.33553e-99	SOX18
MA0693.2	7.99598e-108	0.720586	0.688	0.424	5.06146e-105	VDR
MA1499.1	6.01687e-93	0.719726	0.704	0.427	3.80868e-90	HOXB4
MA1507.1	6.01687e-93	0.719726	0.704	0.427	3.80868e-90	HOXD4
MA0683.1	2.0329e-113	0.719103	0.71	0.426	1.28683e-110	POU4F2
MA1585.1	2.03348e-79	0.712423	0.686	0.443	1.2872e-76	ZKSCAN1
MA1530.1	1.54364e-91	0.710126	0.696	0.437	9.77123e-89	NKX6-3
MA0634.1	7.08727e-85	0.709874	0.674	0.424	4.48624e-82	ALX3
MA1493.1	6.5368e-71	0.705844	0.652	0.438	4.13779e-68	HES6
MA1520.1	6.83079e-133	0.701165	0.75	0.426	4.32389e-130	MAF
MA0077.1	2.52649e-117	0.697963	0.728	0.419	1.59927e-114	SOX9
MA0793.1	3.42123e-112	0.691642	0.72	0.431	2.16564e-109	POU6F2
MA1500.1	1.85575e-88	0.688296	0.693	0.431	1.17469e-85	HOXB6
MA1549.1	9.35461e-89	0.678447	0.697	0.433	5.92147e-86	POU6F1(var.2)
MA0714.1	1.45887e-114	0.669922	0.712	0.43	9.23464e-112	PITX3
MA0670.1	4.71004e-190	0.666486	0.811	0.409	2.98146e-187	NFIA
MA1504.1	1.4323e-72	0.664623	0.673	0.442	9.06643e-70	HOXC4
MA0780.1	1.4957e-51	0.664411	0.636	0.44	9.4678e-49	PAX3
MA0259.1	4.45577e-62	0.660722	0.648	0.44	2.8205e-59	ARNT::HIF1A
MA0713.1	2.50595e-88	0.657895	0.689	0.429	1.58626e-85	PHOX2A
MA0680.1	9.47478e-57	0.657213	0.645	0.438	5.99754e-54	PAX7
MA0909.2	8.94008e-105	0.656295	0.694	0.423	5.65907e-102	HOXD13
MA0597.1	2.23778e-131	0.652915	0.748	0.428	1.41652e-128	THAP1
MA0153.2	2.43305e-103	0.651492	0.707	0.432	1.54012e-100	HNF1B
MA0866.1	6.36653e-94	0.6506	0.695	0.44	4.03001e-91	SOX21
MA0746.2	5.73518e-110	0.650212	0.701	0.414	3.63037e-107	SP3
MA0596.1	2.45174e-111	0.637659	0.7	0.427	1.55195e-108	SREBF2
MA0907.1	8.56637e-80	0.636351	0.685	0.437	5.42251e-77	HOXC13
MA0595.1	2.36576e-109	0.636071	0.72	0.426	1.49752e-106	SREBF1
MA1521.1	6.36307e-125	0.631482	0.759	0.423	4.02782e-122	MAFA
MA0766.2	3.81302e-54	0.630346	0.612	0.454	2.41364e-51	GATA5
MA1124.1	4.24575e-144	0.629674	0.765	0.422	2.68756e-141	ZNF24
MA1471.1	1.33424e-69	0.629171	0.649	0.449	8.44575e-67	BARX2
MA1573.1	1.39978e-106	0.628873	0.704	0.423	8.86058e-104	THAP11
MA0813.1	7.45047e-141	0.627919	0.767	0.426	4.71615e-138	TFAP2B(var.3)
MA0465.2	2.42335e-83	0.622467	0.662	0.429	1.53398e-80	CDX2
MA0875.1	5.02227e-75	0.619757	0.664	0.433	3.17909e-72	BARX1
MA0815.1	1.14475e-131	0.610374	0.763	0.427	7.24627e-129	TFAP2C(var.3)
MA1512.1	9.56766e-90	0.608613	0.675	0.432	6.05633e-87	KLF11
MA0690.1	9.68125e-49	0.604609	0.633	0.456	6.12823e-46	TBX21
MA0847.2	1.19045e-98	0.604045	0.68	0.422	7.53554e-96	FOXD2
MA1100.2	1.74389e-111	0.602962	0.736	0.43	1.10388e-108	ASCL1
MA0648.1	8.24258e-92	0.596443	0.685	0.437	5.21756e-89	GSC
MA0501.1	9.78687e-282	0.591086	0.915	0.399	6.19509e-279	MAF::NFE2
MA1580.1	1.13235e-62	0.590472	0.653	0.452	7.16779e-60	ZBTB32
MA0891.1	1.81849e-89	0.587487	0.69	0.436	1.15111e-86	GSC2
MA0872.1	1.9649e-123	0.586653	0.757	0.433	1.24378e-120	TFAP2A(var.3)
MA0846.1	7.45695e-102	0.582714	0.686	0.422	4.72025e-99	FOXC2
MA1487.1	3.53115e-117	0.581749	0.718	0.429	2.23522e-114	FOXE1
MA0084.1	2.29028e-77	0.581075	0.655	0.436	1.44975e-74	SRY
MA0884.1	5.16192e-81	0.58081	0.68	0.437	3.2675e-78	DUXA
MA0468.1	4.9182e-79	0.574522	0.66	0.438	3.11322e-76	DUX4
MA0689.1	6.42283e-54	0.569949	0.646	0.457	4.06565e-51	TBX20
MA1639.1	1.5811e-130	0.561811	0.75	0.413	1.00084e-127	MEIS1(var.2)
MA1529.1	3.383e-130	0.554472	0.752	0.426	2.14144e-127	NHLH2
MA0914.1	6.87889e-64	0.551974	0.684	0.446	4.35434e-61	ISL2
MA1602.1	1.05512e-50	0.549203	0.619	0.446	6.67893e-48	ZSCAN29
MA1557.1	1.21267e-76	0.547932	0.68	0.434	7.67619e-74	SMAD5
MA0646.1	3.47834e-51	0.54148	0.631	0.45	2.20179e-48	GCM1
MA0657.1	2.19623e-45	0.531625	0.634	0.454	1.39022e-42	KLF13
MA1649.1	3.85278e-107	0.526562	0.698	0.437	2.43881e-104	ZBTB12
MA0783.1	7.78381e-65	0.520198	0.659	0.45	4.92715e-62	PKNOX2
MA0047.3	2.12897e-69	0.519057	0.661	0.443	1.34764e-66	FOXA2
MA0724.1	1.72463e-34	0.515688	0.61	0.458	1.09169e-31	VENTX
MA1583.1	1.06766e-43	0.514566	0.633	0.46	6.75828e-41	ZFP57
MA1636.1	2.02356e-195	0.511999	0.83	0.401	1.28091e-192	CEBPG(var.2)
MA1506.1	1.86814e-51	0.499656	0.635	0.434	1.18253e-48	HOXD10
MA0795.1	7.20621e-66	0.495384	0.666	0.441	4.56153e-63	SMAD3
MA1114.1	1.54175e-101	0.494493	0.714	0.426	9.75927e-99	PBX3
MA0679.2	3.80512e-48	0.482975	0.619	0.446	2.40864e-45	ONECUT1
MA1480.1	7.99999e-44	0.48104	0.633	0.447	5.064e-41	DPRX
MA1509.1	2.22069e-33	0.474655	0.607	0.454	1.4057e-30	IRF6
MA0729.1	2.49747e-111	0.466981	0.702	0.391	1.5809e-108	RARA
MA0036.3	2.39629e-49	0.458306	0.624	0.442	1.51685e-46	GATA2
MA1496.1	2.14871e-59	0.449074	0.655	0.447	1.36013e-56	HOXA4
MA0852.2	4.99544e-73	0.448078	0.662	0.435	3.16211e-70	FOXK1
MA0685.1	1.85137e-51	0.446864	0.635	0.441	1.17192e-48	SP4
MA0715.1	6.65921e-64	0.445918	0.634	0.438	4.21528e-61	PROP1
MA0775.1	1.85315e-56	0.445881	0.637	0.446	1.17304e-53	MEIS3
MA0009.2	1.62761e-32	0.443097	0.618	0.471	1.03028e-29	TBXT
MA1562.1	2.65786e-75	0.436189	0.659	0.441	1.68243e-72	SOX14
MA1498.1	1.90239e-34	0.434082	0.599	0.458	1.20421e-31	HOXA7
MA1502.1	1.90239e-34	0.434082	0.599	0.458	1.20421e-31	HOXB8
MA0910.2	1.90239e-34	0.434082	0.599	0.458	1.20421e-31	HOXD8
MA1683.1	9.22114e-59	0.432294	0.636	0.446	5.83698e-56	FOXA3
MA0688.1	5.67502e-36	0.431067	0.629	0.456	3.59228e-33	TBX2
MA0143.4	2.08134e-71	0.429328	0.65	0.43	1.31749e-68	SOX2
MA0035.4	9.11391e-33	0.42596	0.584	0.452	5.7691e-30	GATA1
MA1655.1	8.33406e-103	0.421858	0.706	0.438	5.27546e-100	ZNF341
MA1588.1	8.55876e-68	0.419636	0.633	0.438	5.41769e-65	ZNF136
MA0069.1	9.47417e-41	0.417935	0.605	0.456	5.99715e-38	PAX6
MA0613.1	8.83109e-62	0.416912	0.642	0.44	5.59008e-59	FOXG1
MA1489.1	5.82683e-27	0.413297	0.582	0.454	3.68838e-24	FOXN3
MA0698.1	1.51084e-108	0.413035	0.723	0.44	9.56364e-106	ZBTB18
MA1120.1	4.17693e-82	0.409247	0.682	0.44	2.64399e-79	SOX13
MA0030.1	1.18879e-55	0.407191	0.641	0.449	7.52503e-53	FOXF2
MA0800.1	1.79053e-25	0.404282	0.588	0.466	1.1334e-22	EOMES
MA1533.1	4.86434e-71	0.404181	0.654	0.434	3.07913e-68	NR1I2
MA0610.1	9.92435e-42	0.402591	0.615	0.456	6.28211e-39	DMRT3
MA0782.2	1.10052e-71	0.39886	0.672	0.431	6.96627e-69	PKNOX1
MA0651.1	1.63751e-23	0.395123	0.574	0.465	1.03654e-20	HOXC11
MA1155.1	3.04323e-92	0.393666	0.698	0.446	1.92636e-89	ZSCAN4
MA1103.2	5.09314e-44	0.393665	0.619	0.446	3.22396e-41	FOXK2
MA1104.2	7.95272e-32	0.391222	0.601	0.458	5.03407e-29	GATA6
MA0833.2	1.00998e-117	0.387103	0.727	0.406	6.3932e-115	ATF4
MA1553.1	3.11097e-60	0.386733	0.65	0.44	1.96925e-57	RARG(var.3)
MA0070.1	7.03064e-23	0.385429	0.59	0.472	4.4504e-20	PBX1
MA0747.1	3.96445e-49	0.379515	0.633	0.438	2.5095e-46	SP8
MA0031.1	1.26829e-42	0.377566	0.616	0.448	8.02825e-40	FOXD1
MA0157.2	1.26829e-42	0.377566	0.616	0.448	8.02825e-40	FOXO3
MA0482.2	4.10445e-39	0.376691	0.612	0.447	2.59812e-36	GATA4
MA0159.1	2.70518e-99	0.369828	0.693	0.431	1.71238e-96	RARA::RXRA
MA1531.1	8.84555e-76	0.362849	0.674	0.427	5.59923e-73	NR1D1
MA0599.1	8.20137e-60	0.359524	0.643	0.439	5.19147e-57	KLF5
MA0138.2	9.12143e-85	0.358433	0.696	0.441	5.77387e-82	REST
MA0042.2	6.16584e-43	0.3584	0.61	0.45	3.90298e-40	FOXI1
MA0033.2	6.16584e-43	0.3584	0.61	0.45	3.90298e-40	FOXL1
MA0848.1	6.16584e-43	0.3584	0.61	0.45	3.90298e-40	FOXO4
MA0849.1	6.16584e-43	0.3584	0.61	0.45	3.90298e-40	FOXO6
MA0850.1	6.16584e-43	0.3584	0.61	0.45	3.90298e-40	FOXP3
MA0113.3	1.23024e-51	0.355711	0.639	0.441	7.78744e-49	NR3C1
MA0502.2	2.50041e-28	0.351506	0.609	0.469	1.58276e-25	NFYB
MA1599.1	3.10539e-79	0.348269	0.697	0.443	1.96571e-76	ZNF682
MA0088.2	1.89299e-37	0.347588	0.61	0.451	1.19826e-34	ZNF143
MA0043.3	1.05811e-113	0.346203	0.726	0.42	6.69784e-111	HLF
MA1116.1	2.60659e-151	0.34202	0.823	0.45	1.64997e-148	RBPJ
MA0802.1	1.44056e-22	0.335547	0.606	0.472	9.11877e-20	TBR1
MA0868.2	4.45453e-86	0.3299	0.693	0.42	2.81972e-83	SOX8
MA1645.1	1.7265e-57	0.329196	0.641	0.439	1.09288e-54	NKX2-2
MA0032.2	6.40193e-47	0.327333	0.624	0.452	4.05242e-44	FOXC1
MA0752.1	6.358e-33	0.32458	0.599	0.453	4.02462e-30	ZNF410
MA0873.1	2.85916e-25	0.318413	0.591	0.458	1.80985e-22	HOXD12
MA0740.1	5.09694e-21	0.314143	0.575	0.468	3.22636e-18	KLF14
MA1479.1	9.57892e-37	0.309614	0.583	0.457	6.06346e-34	DMRTC2
MA0796.1	2.62401e-34	0.308489	0.629	0.46	1.661e-31	TGIF1
MA0037.3	9.06945e-26	0.289332	0.586	0.45	5.74096e-23	GATA3
MA0089.2	1.11032e-274	0.287441	0.933	0.396	7.02835e-272	NFE2L1
MA1654.1	6.64596e-105	0.283206	0.744	0.445	4.20689e-102	ZNF16
MA1579.1	9.63713e-111	0.278276	0.724	0.451	6.1003e-108	ZBTB26
MA0481.3	7.53292e-41	0.277224	0.61	0.456	4.76834e-38	FOXP1
MA0797.1	6.77751e-30	0.27183	0.611	0.461	4.29016e-27	TGIF2
MA0025.2	6.65884e-89	0.262497	0.691	0.422	4.21505e-86	NFIL3
MA1571.1	1.46301e-26	0.260776	0.58	0.465	9.26087e-24	TGIF2LX
MA0757.1	2.94527e-21	0.258498	0.564	0.455	1.86436e-18	ONECUT3
MA1478.1	4.90819e-19	0.258291	0.556	0.458	3.10688e-16	DMRTA2
MA0140.2	3.50929e-24	0.247853	0.581	0.463	2.22138e-21	GATA1::TAL1
MA0593.1	1.25372e-47	0.246792	0.62	0.44	7.93602e-45	FOXP2
MA0818.1	7.33147e-18	0.24552	0.565	0.465	4.64082e-15	BHLHE22
MA1560.1	2.50606e-24	0.244717	0.574	0.457	1.58634e-21	SOHLH2
MA0048.2	2.01843e-73	0.241314	0.694	0.444	1.27767e-70	NHLH1
MA0819.1	1.1233e-21	0.241193	0.578	0.458	7.11048e-19	CLOCK
MA0660.1	4.878e-54	0.238795	0.616	0.414	3.08778e-51	MEF2B
MA1101.2	0	0.233224	0.972	0.331	0	BACH2
MA0827.1	2.38476e-23	0.230313	0.572	0.458	1.50955e-20	OLIG3
MA0817.1	1.01353e-16	0.222167	0.552	0.473	6.41562e-14	BHLHE23
MA0895.1	1.40905e-11	0.215038	0.537	0.464	8.91928e-09	HMBOX1
MA0672.1	1.44582e-28	0.214624	0.571	0.454	9.15205e-26	NKX2-3
MA1564.1	8.35815e-20	0.213265	0.584	0.459	5.29071e-17	SP9
MA1589.1	6.45737e-78	0.213111	0.675	0.423	4.08751e-75	ZNF140
MA0668.1	4.93181e-20	0.212337	0.563	0.461	3.12183e-17	NEUROD2
MA1644.1	0.00558408	0.207612	0.531	0.495	1	NFYC
MA0090.3	1.27513e-281	0.201942	0.94	0.38	8.07156e-279	TEAD1
MA0635.1	2.91217e-13	0.195712	0.554	0.469	1.8434e-10	BARHL2
MA1542.1	2.28693e-14	0.19514	0.571	0.466	1.44762e-11	OSR1
MA0148.4	1.3173e-37	0.193518	0.617	0.452	8.33848e-35	FOXA1
MA1555.1	1.29929e-36	0.190045	0.601	0.443	8.22452e-34	RXRB(var.2)
MA1572.1	8.54372e-17	0.189947	0.568	0.474	5.40817e-14	TGIF2LY
MA0639.1	1.91741e-22	0.186465	0.564	0.45	1.21372e-19	DBP
MA0877.2	0.000176485	0.186141	0.518	0.475	0.111715	BARHL1
MA0074.1	2.10039e-30	0.181682	0.59	0.448	1.32955e-27	RXRA::VDR
MA0863.1	2.25836e-24	0.176197	0.586	0.464	1.42954e-21	MTF1
MA1635.1	1.67677e-87	0.17561	0.705	0.447	1.06139e-84	BHLHE22(var.2)
MA0678.1	5.08412e-15	0.174205	0.563	0.462	3.21825e-12	OLIG2
MA0100.3	3.08091e-23	0.174056	0.576	0.454	1.95022e-20	MYB
MA0767.1	5.29724e-18	0.173029	0.568	0.464	3.35315e-15	GCM2
MA1657.1	2.45618e-31	0.172494	0.582	0.45	1.55476e-28	ZNF652
MA1534.1	2.82732e-26	0.172374	0.564	0.451	1.78969e-23	NR1I3
MA0681.2	1.26262e-30	0.171862	0.564	0.449	7.99237e-28	PHOX2B
MA1108.2	7.1721e-94	0.169508	0.685	0.432	4.53994e-91	MXI1
MA0906.1	1.68732e-10	0.168384	0.536	0.471	1.06807e-07	HOXC12
MA1485.1	5.51756e-32	0.164722	0.607	0.459	3.49262e-29	FERD3L
MA0786.1	2.00154e-17	0.159733	0.57	0.467	1.26698e-14	POU3F1
MA1552.1	5.27726e-29	0.159357	0.607	0.456	3.3405e-26	RARB(var.3)
MA0528.2	2.91161e-80	0.156707	0.673	0.427	1.84305e-77	ZNF263
MA0498.2	2.14987e-12	0.15633	0.556	0.466	1.36087e-09	MEIS1
MA0779.1	1.68008e-14	0.155635	0.536	0.46	1.06349e-11	PAX1
MA0594.2	0.363288	0.154529	0.479	0.488	1	HOXA9
MA0063.2	1.50878e-17	0.151189	0.558	0.451	9.55057e-15	NKX2-5
MA0485.2	2.51574e-07	0.150173	0.535	0.478	0.000159246	HOXC9
MA0789.1	8.98527e-14	0.147933	0.556	0.473	5.68768e-11	POU3F4
MA0731.1	1.9427e-69	0.145397	0.657	0.449	1.22973e-66	BCL6B
MA0756.1	3.70293e-05	0.145004	0.518	0.469	0.0234396	ONECUT2
MA0463.2	1.73741e-65	0.143967	0.66	0.448	1.09978e-62	BCL6
MA0826.1	1.46124e-15	0.143596	0.553	0.473	9.24968e-13	OLIG1
MA1576.1	7.02725e-67	0.143439	0.64	0.428	4.44825e-64	THRB(var.3)
MA0784.1	8.39356e-21	0.142774	0.573	0.466	5.31313e-18	POU1F1
MA0773.1	1.10175e-52	0.1411	0.618	0.406	6.97411e-50	MEF2D
MA0845.1	1.19442e-21	0.138372	0.561	0.456	7.56067e-19	FOXB1
MA0112.3	1.91726e-60	0.137598	0.625	0.414	1.21362e-57	ESR1
MA0479.1	1.17949e-28	0.13663	0.596	0.456	7.4662e-26	FOXH1
MA1600.1	1.24399e-67	0.135242	0.659	0.446	7.87445e-65	ZNF684
MA0665.1	1.85122e-34	0.135164	0.602	0.454	1.17182e-31	MSC
MA1421.1	2.93325e-20	0.133177	0.56	0.46	1.85674e-17	TCF7L1
MA0823.1	8.96282e-17	0.126903	0.543	0.442	5.67346e-14	HEY1
MA0623.2	3.89979e-16	0.125587	0.561	0.467	2.46857e-13	NEUROG1
MA1152.1	5.52676e-38	0.123228	0.589	0.431	3.49844e-35	SOX15
MA0509.2	4.67703e-06	0.118093	0.53	0.484	0.00296056	RFX1
MA1556.1	3.74011e-37	0.114546	0.614	0.437	2.36749e-34	RXRG(var.2)
MA0500.2	9.62304e-55	0.11285	0.647	0.45	6.09139e-52	MYOG
MA0469.3	0.00411388	0.108222	0.531	0.484	1	E2F3
MA1149.1	3.96449e-30	0.10611	0.577	0.444	2.50952e-27	RARA::RXRG
MA0835.2	0	0.104358	0.972	0.334	0	BATF3
MA0804.1	9.47318e-06	0.102811	0.518	0.481	0.00599652	TBX19
MA0843.1	2.45875e-24	0.101292	0.564	0.456	1.55639e-21	TEF
MA0788.1	5.96976e-08	0.0916995	0.535	0.475	3.77886e-05	POU3F3
MA0787.1	1.02417e-11	0.0783329	0.553	0.461	6.48298e-09	POU3F2
MA1646.1	4.46232e-70	0.0777525	0.671	0.436	2.82465e-67	OSR2
MA0095.2	0.00161111	0.0743614	0.503	0.484	1	YY1
MA1503.1	3.05599e-05	0.0726689	0.535	0.481	0.0193444	HOXB9
MA0781.1	1.01732e-06	0.067927	0.527	0.47	0.000643962	PAX9
MA0905.1	2.25133e-09	0.0667347	0.547	0.472	1.42509e-06	HOXC10
MA0727.1	2.0858e-23	0.0623747	0.587	0.451	1.32031e-20	NR3C2
MA1594.1	3.43691e-16	0.0567765	0.543	0.46	2.17556e-13	ZNF382
MA0462.2	0	0.0499676	0.972	0.332	0	BATF::JUN
MA0867.2	6.39453e-65	0.0491914	0.657	0.442	4.04774e-62	SOX4
MA0649.1	9.38502e-16	0.0484553	0.543	0.446	5.94072e-13	HEY2
MA0673.1	1.32149e-19	0.0482925	0.57	0.458	8.36501e-17	NKX2-8
MA0154.4	5.95348e-103	0.0405171	0.749	0.456	3.76855e-100	EBF1
MA1637.1	6.4684e-92	0.0388533	0.725	0.449	4.0945e-89	EBF3
MA0083.3	3.12984e-11	0.0375229	0.514	0.453	1.98119e-08	SRF
MA1523.1	2.75136e-25	0.0357797	0.568	0.451	1.74161e-22	MSANTD3
MA0697.1	2.3143e-23	0.033263	0.57	0.453	1.46495e-20	ZIC3
MA1575.1	2.79834e-44	0.0313811	0.612	0.439	1.77135e-41	THRB(var.2)
MA0785.1	2.36672e-08	0.0299576	0.544	0.47	1.49814e-05	POU2F1
MA0794.1	4.18989e-05	0.0273039	0.515	0.476	0.026522	PROX1
MA1601.1	7.85781e-69	0.0270672	0.668	0.45	4.97399e-66	ZNF75D
MA0754.1	0.501845	0.0217978	0.496	0.486	1	CUX1
MA0066.1	7.30538e-46	0.0126454	0.625	0.446	4.62431e-43	PPARG
MA1121.1	4.23566e-289	0.0122237	0.95	0.374	2.68117e-286	TEAD2
MA0052.4	5.79063e-33	0.0114664	0.59	0.424	3.66547e-30	MEF2A
MA0769.2	3.62288e-07	0.011107	0.529	0.473	0.000229329	TCF7
MA1130.1	0	0.00853982	0.97	0.326	0	FOSL2::JUN
MA0669.1	1.23166e-10	0.00787397	0.521	0.47	7.79641e-08	NEUROG2
MA1561.1	4.86981e-05	-0.00857536	0.508	0.472	0.0308259	SOX12
MA0105.4	8.76047e-48	-0.0114012	0.63	0.432	5.54538e-45	NFKB1
MA0842.2	1.43145e-34	-0.0142594	0.599	0.445	9.06108e-32	NRL
MA0774.1	5.73698e-08	-0.014967	0.525	0.466	3.63151e-05	MEIS2
MA1592.1	4.24466e-34	-0.0234241	0.584	0.446	2.68687e-31	ZNF274
MA1641.1	1.06895e-59	-0.0275337	0.646	0.447	6.76646e-57	MYF5
MA1546.1	0.0390907	-0.027711	0.486	0.486	1	PAX3(var.2)
MA1472.1	6.58917e-62	-0.0278463	0.663	0.451	4.17095e-59	BHLHA15(var.2)
MA1651.1	0.0021751	-0.0279821	0.514	0.481	1	ZFP42
MA1568.1	4.95339e-12	-0.0339514	0.524	0.461	3.1355e-09	TCF21(var.2)
MA0792.1	2.3745e-05	-0.0340262	0.533	0.466	0.0150306	POU5F1B
MA0908.1	0.00942744	-0.0410074	0.512	0.474	1	HOXD11
MA0060.3	0.401347	-0.041039	0.519	0.508	1	NFYA
MA1494.1	7.28512e-27	-0.0515625	0.581	0.45	4.61148e-24	HNF4A(var.2)
MA0711.1	0.721426	-0.0538589	0.483	0.49	1	OTX1
MA0507.1	0.00903921	-0.0593754	0.493	0.477	1	POU2F2
MA0442.2	3.68132e-23	-0.0625266	0.556	0.447	2.33027e-20	SOX10
MA0809.2	1.79516e-278	-0.0645951	0.95	0.371	1.13634e-275	TEAD4
MA0470.2	0.991694	-0.068351	0.488	0.495	1	E2F4
MA1597.1	6.82895e-87	-0.0696309	0.693	0.436	4.32273e-84	ZNF528
MA0104.4	3.89859e-13	-0.0767254	0.532	0.457	2.46781e-10	MYCN
MA1524.1	5.94742e-05	-0.0857246	0.504	0.475	0.0376472	MSGN1
MA0523.1	0.132619	-0.0863012	0.491	0.491	1	TCF7L2
MA0798.2	0.236944	-0.0871677	0.483	0.491	1	RFX3
MA0837.1	4.9146e-153	-0.0968914	0.775	0.368	3.11094e-150	CEBPE
MA0667.1	2.62074e-11	-0.0976156	0.534	0.461	1.65893e-08	MYF6
MA0730.1	7.27835e-32	-0.0992161	0.579	0.45	4.6072e-29	RARA(var.2)
MA0495.3	1.85282e-30	-0.101989	0.584	0.433	1.17284e-27	MAFF
MA1514.1	4.57458e-08	-0.103852	0.525	0.466	2.89571e-05	KLF17
MA0768.1	0.00563073	-0.107133	0.489	0.481	1	LEF1
MA0828.1	0.0787461	-0.110979	0.48	0.485	1	SREBF2(var.2)
MA0497.1	1.6532e-25	-0.114287	0.562	0.42	1.04648e-22	MEF2C
MA0147.3	2.16258e-07	-0.11506	0.49	0.459	0.000136891	MYC
MA1466.1	0.0161578	-0.117219	0.496	0.485	1	ATF6
MA0024.3	0.00141026	-0.119218	0.448	0.499	0.892691	E2F1
MA1143.1	0.413127	-0.1265	0.461	0.494	1	FOSL1::JUND(var.2)
MA0844.1	0.654983	-0.131753	0.472	0.483	1	XBP1
MA1470.1	0.682139	-0.139293	0.479	0.49	1	BACH2(var.2)
MA0637.1	0.653381	-0.139772	0.477	0.49	1	CENPB
MA1554.1	0.0234756	-0.141197	0.492	0.506	1	RFX7
MA0472.2	0.191467	-0.150391	0.453	0.466	1	EGR2
MA0737.1	1.47125e-15	-0.151354	0.555	0.461	9.31302e-13	GLIS3
MA1584.1	0.0162346	-0.151525	0.485	0.479	1	ZIC5
MA0733.1	0.0437682	-0.159716	0.465	0.455	1	EGR4
MA0471.2	4.83532e-06	-0.162946	0.483	0.443	0.00306075	E2F6
MA0516.2	0.0636967	-0.169041	0.448	0.495	1	SP2
MA0691.1	2.55672e-38	-0.173134	0.628	0.443	1.6184e-35	TFAP4
MA0155.1	1.05365e-16	-0.179518	0.542	0.462	6.6696e-14	INSM1
MA0616.2	0.00400437	-0.179703	0.493	0.465	1	HES2
MA1150.1	3.41528e-17	-0.191653	0.542	0.455	2.16187e-14	RORB
MA0627.2	0.0200283	-0.194376	0.504	0.477	1	POU2F3
MA1151.1	0.00164489	-0.195938	0.491	0.471	1	RORC
MA0808.1	4.08301e-285	-0.196234	0.951	0.37	2.58454e-282	TEAD3
MA1117.1	1.66585e-66	-0.199868	0.664	0.448	1.05448e-63	RELB
MA0825.1	0.0166503	-0.200466	0.484	0.471	1	MNT
MA0152.1	3.83288e-71	-0.200824	0.647	0.433	2.42621e-68	NFATC2
MA0751.1	0.00550544	-0.203393	0.492	0.479	1	ZIC4
MA0755.1	3.20606e-06	-0.209049	0.437	0.505	0.00202943	CUX2
MA0758.1	0.0146795	-0.216302	0.482	0.481	1	E2F7
MA1634.1	0	-0.216325	0.972	0.333	0	BATF
MA0102.4	7.05975e-200	-0.217436	0.849	0.4	4.46882e-197	CEBPA
MA0114.4	9.91396e-54	-0.219816	0.612	0.432	6.27554e-51	HNF4A
MA0696.1	0.000250466	-0.225489	0.492	0.475	0.158545	ZIC1
MA0741.1	4.41012e-09	-0.22653	0.412	0.493	2.7916e-06	KLF16
MA1122.1	0.171612	-0.22698	0.469	0.466	1	TFDP1
MA0753.2	0.000329978	-0.235117	0.491	0.464	0.208876	ZNF740
MA0632.2	0.634793	-0.236985	0.453	0.475	1	TCFL5
MA0144.2	1.4494e-86	-0.237272	0.68	0.439	9.1747e-84	STAT3
MA0659.2	1.87656e-33	-0.239874	0.57	0.429	1.18786e-30	MAFG
MA1099.2	0.725786	-0.243595	0.453	0.482	1	HES1
MA0771.1	8.19975e-26	-0.249339	0.585	0.451	5.19044e-23	HSF4
MA1548.1	1.43245e-05	-0.25353	0.507	0.473	0.00906743	PLAGL2
MA0735.1	0.384043	-0.254552	0.477	0.485	1	GLIS1
MA1147.1	0.00424435	-0.260856	0.478	0.469	1	NR4A2::RXRA
MA0777.1	6.15558e-05	-0.265943	0.453	0.499	0.0389648	MYBL2
MA0776.1	0.0895481	-0.269135	0.463	0.496	1	MYBL1
MA1115.1	0.188054	-0.271242	0.491	0.477	1	POU5F1
MA0839.1	0.617299	-0.273504	0.487	0.478	1	CREB3L1
MA1125.1	0.0033856	-0.277548	0.501	0.472	1	ZNF384
MA1109.1	4.12028e-31	-0.278605	0.572	0.45	2.60814e-28	NEUROD1
MA1136.1	0.706184	-0.285981	0.473	0.475	1	FOSB::JUNB(var.2)
MA0466.2	1.07504e-114	-0.28741	0.739	0.398	6.80499e-112	CEBPB
MA0163.1	1.25753e-06	-0.290257	0.48	0.446	0.000796017	PLAG1
MA1154.1	3.83644e-18	-0.297714	0.553	0.447	2.42847e-15	ZNF282
MA0734.2	3.07904e-12	-0.297923	0.534	0.451	1.94904e-09	GLI2
MA0258.2	9.5458e-39	-0.299661	0.613	0.433	6.04249e-36	ESR2
MA1127.1	0.408747	-0.30043	0.456	0.487	1	FOSB::JUN
MA1467.1	3.98031e-39	-0.306847	0.615	0.45	2.51954e-36	ATOH1(var.2)
MA1468.1	8.27765e-10	-0.307785	0.526	0.458	5.23975e-07	ATOH7
MA1638.1	1.48867e-24	-0.310746	0.558	0.458	9.42327e-22	HAND2
MA1642.1	4.90274e-25	-0.311179	0.56	0.452	3.10344e-22	NEUROG2(var.2)
MA0476.1	0	-0.312419	0.973	0.332	0	FOS
MA0736.1	7.47495e-05	-0.316334	0.479	0.465	0.0473165	GLIS2
MA1146.1	0.000347284	-0.327066	0.5	0.46	0.219831	NR1H4::RXRA
MA0484.2	2.6449e-46	-0.331999	0.599	0.435	1.67422e-43	HNF4G
MA0770.1	1.63139e-38	-0.338372	0.592	0.439	1.03267e-35	HSF2
MA1593.1	2.49193e-21	-0.340757	0.569	0.451	1.57739e-18	ZNF317
MA1129.1	0.0165544	-0.343098	0.446	0.489	1	FOSL1::JUN(var.2)
MA1539.1	3.76184e-09	-0.346181	0.53	0.457	2.38124e-06	NR2F6(var.3)
MA0865.1	0.0781665	-0.346647	0.466	0.468	1	E2F8
MA0841.1	0	-0.347767	0.968	0.337	0	NFE2
MA0131.2	2.11716e-06	-0.347855	0.431	0.492	0.00134016	HINFP
MA1532.1	7.48645e-08	-0.351817	0.527	0.464	4.73892e-05	NR1D2
MA0836.2	1.67129e-168	-0.363034	0.817	0.412	1.05793e-165	CEBPD
MA0486.2	2.20978e-21	-0.375784	0.564	0.447	1.39879e-18	HSF1
MA0072.1	0.00233076	-0.379264	0.422	0.487	1	RORA(var.2)
MA0492.1	4.05988e-28	-0.379998	0.579	0.428	2.5699e-25	JUND(var.2)
MA1139.1	0.0149514	-0.384032	0.451	0.476	1	FOSL2::JUNB(var.2)
MA1650.1	0.000186865	-0.384352	0.409	0.481	0.118285	ZBTB14
MA0162.4	6.59339e-15	-0.385144	0.388	0.487	4.17362e-12	EGR1
MA1522.1	0.593855	-0.388542	0.439	0.478	1	MAZ
MA0504.1	0.00886516	-0.397838	0.469	0.458	1	NR2C2
MA0638.1	7.26019e-06	-0.398021	0.436	0.499	0.0045957	CREB3
MA0605.2	0.116862	-0.40665	0.451	0.475	1	ATF3
MA0014.3	0.789953	-0.406916	0.453	0.473	1	PAX5
MA1126.1	0.757496	-0.408624	0.453	0.464	1	FOS::JUN(var.2)
MA1140.2	3.75477e-06	-0.412168	0.411	0.496	0.00237677	JUNB(var.2)
MA0099.3	0	-0.416762	0.968	0.33	0	FOS::JUN
MA0058.3	0.0220812	-0.419441	0.494	0.461	1	MAX
MA0527.1	3.92348e-16	-0.419549	0.397	0.506	2.48356e-13	ZBTB33
MA0778.1	1.79585e-19	-0.426712	0.557	0.463	1.13677e-16	NFKB2
MA1541.1	4.29514e-13	-0.445359	0.53	0.434	2.71883e-10	NR6A1
MA0694.1	3.49558e-10	-0.451806	0.395	0.503	2.2127e-07	ZBTB7B
MA0834.1	0.000164267	-0.452887	0.429	0.492	0.103981	ATF7
MA1148.1	3.33615e-13	-0.465605	0.518	0.45	2.11178e-10	PPARA::RXRA
MA0864.2	3.5998e-15	-0.466218	0.419	0.516	2.27867e-12	E2F2
MA1145.1	0.261174	-0.472948	0.45	0.465	1	FOSL2::JUND(var.2)
MA0073.1	7.15732e-13	-0.478942	0.387	0.49	4.53059e-10	RREB1
MA0059.1	0.00234005	-0.481524	0.471	0.47	1	MAX::MYC
MA0799.1	2.0302e-20	-0.481928	0.415	0.517	1.28512e-17	RFX4
MA0091.1	8.98e-15	-0.488027	0.536	0.459	5.68434e-12	TAL1::TCF3
MA0732.1	3.84531e-12	-0.49065	0.393	0.486	2.43408e-09	EGR3
MA1135.1	0	-0.493256	0.972	0.325	0	FOSB::JUNB
MA1474.1	1.55073e-10	-0.496563	0.406	0.498	9.81612e-08	CREB3L4
MA1131.1	0.0295186	-0.496686	0.435	0.48	1	FOSL2::JUN(var.2)
MA0656.1	1.2849e-05	-0.507222	0.406	0.489	0.00813339	JDP2(var.2)
MA0508.3	9.74799e-14	-0.507746	0.526	0.45	6.17048e-11	PRDM1
MA0464.2	5.72085e-06	-0.519835	0.427	0.486	0.0036213	BHLHE40
MA1578.1	0.706926	-0.523552	0.429	0.476	1	VEZF1
MA1491.1	0.0174362	-0.532258	0.494	0.451	1	GLI3
MA0838.1	3.75661e-130	-0.539436	0.756	0.371	2.37793e-127	CEBPG
MA1570.1	0.067323	-0.545108	0.453	0.463	1	TFAP4(var.2)
MA0862.1	4.52377e-23	-0.551408	0.395	0.517	2.86355e-20	GMEB2
MA1653.1	2.40728e-41	-0.555074	0.327	0.488	1.52381e-38	ZNF148
MA1142.1	0	-0.555948	0.973	0.327	0	FOSL1::JUND
MA0749.1	1.93074e-24	-0.556464	0.388	0.519	1.22216e-21	ZBED1
MA1133.1	9.27701e-09	-0.565217	0.397	0.491	5.87235e-06	JUN::JUNB(var.2)
MA0695.1	2.04389e-12	-0.578656	0.41	0.506	1.29378e-09	ZBTB7C
MA1123.2	2.10385e-24	-0.579565	0.563	0.452	1.33173e-21	TWIST1
MA1132.1	3.56673e-298	-0.591606	0.959	0.33	2.25774e-295	JUN::JUNB
MA1525.1	0.0736603	-0.609063	0.466	0.46	1	NFATC4
MA1513.1	5.89042e-46	-0.615247	0.319	0.525	3.72864e-43	KLF15
MA0071.1	0.657005	-0.616602	0.453	0.46	1	RORA
MA0625.1	0.000391699	-0.639235	0.463	0.453	0.247946	NFATC3
MA0488.1	1.20624e-24	-0.643989	0.56	0.431	7.63552e-22	JUN
MA0510.2	6.87619e-25	-0.652656	0.388	0.526	4.35263e-22	RFX5
MA1537.1	1.34045e-08	-0.653891	0.513	0.444	8.48506e-06	NR2F1(var.2)
MA1538.1	0.00221426	-0.664954	0.486	0.46	1	NR2F1(var.3)
MA1550.1	0.00141775	-0.668102	0.47	0.462	0.897438	PPARD
MA0057.1	0.00485151	-0.682551	0.466	0.456	1	MZF1(var.2)
MA1134.1	0	-0.683303	0.972	0.327	0	FOS::JUNB
MA0056.2	3.47561e-07	-0.685473	0.5	0.456	0.000220006	MZF1
MA0609.2	2.95364e-16	-0.709577	0.376	0.498	1.86965e-13	CREM
MA0491.2	0	-0.719686	0.973	0.327	0	JUND
MA1574.1	0.00202021	-0.72154	0.464	0.449	1	THRB
MA1138.1	0	-0.726133	0.976	0.325	0	FOSL2::JUNB
MA0600.2	2.7782e-35	-0.732528	0.371	0.531	1.7586e-32	RFX2
MA0655.1	0	-0.776772	0.972	0.323	0	JDP2
MA1475.1	7.5124e-26	-0.782501	0.353	0.504	4.75535e-23	CREB3L4(var.2)
MA1144.1	0	-0.787957	0.968	0.325	0	FOSL2::JUND
MA1102.2	1.62581e-79	-0.822202	0.278	0.526	1.02914e-76	CTCFL
MA1464.1	5.77244e-10	-0.830512	0.384	0.474	3.65395e-07	ARNT2
MA0856.1	0.251279	-0.841381	0.455	0.455	1	RXRG
MA0149.1	1.01024e-11	-0.8424	0.516	0.421	6.39483e-09	EWSR1-FLI1
MA1535.1	1.41763e-06	-0.844265	0.487	0.443	0.000897362	NR2C1
MA0855.1	0.510384	-0.847986	0.461	0.454	1	RXRB
MA0137.3	1.56214e-38	-0.865593	0.59	0.423	9.88837e-36	STAT1
MA0636.1	8.2097e-19	-0.872431	0.373	0.488	5.19674e-16	BHLHE41
MA1632.1	0.000412275	-0.875442	0.459	0.441	0.26097	ATF2
MA0017.2	1.15024e-21	-0.940651	0.551	0.388	7.28101e-19	NR2F1
MA1110.1	0.000305617	-0.96196	0.492	0.455	0.193455	NR1H4
MA0477.2	0	-0.968898	0.973	0.326	0	FOSL1
MA0478.1	0	-0.986357	0.975	0.33	0	FOSL2
MA1420.1	1.94341e-14	-0.986362	0.401	0.497	1.23018e-11	IRF5
MA0664.1	6.24667e-38	-0.998816	0.328	0.499	3.95414e-35	MLXIPL
MA1128.1	0	-1.01178	0.972	0.328	0	FOSL1::JUN
MA0489.1	0	-1.02578	0.978	0.326	0	JUN(var.2)
MA0115.1	8.87737e-05	-1.04516	0.384	0.471	0.0561937	NR1H2::RXRA
MA1137.1	0	-1.0556	0.968	0.328	0	FOSL1::JUNB
MA0663.1	4.58833e-29	-1.058	0.351	0.498	2.90441e-26	MLX
MA0506.1	2.09059e-51	-1.10605	0.294	0.514	1.32334e-48	NRF1
MA0871.2	6.15495e-12	-1.11508	0.363	0.471	3.89608e-09	TFEC
MA0490.2	3.76794e-305	-1.12771	0.968	0.326	2.38511e-302	JUNB
MA0018.4	0.157064	-1.13301	0.422	0.447	1	CREB1
MA1647.1	1.86207e-07	-1.13307	0.479	0.416	0.000117869	PRDM4
MA1540.1	4.01982e-19	-1.16402	0.522	0.419	2.54455e-16	NR5A1
MA1536.1	1.68021e-16	-1.17226	0.53	0.418	1.06358e-13	NR2C2(var.2)
MA0592.3	0.00393629	-1.17256	0.463	0.43	1	ESRRA
MA1545.1	1.52253e-73	-1.20511	0.291	0.539	9.63762e-71	OVOL2
MA0772.1	2.91372e-11	-1.27481	0.361	0.485	1.84439e-08	IRF7
MA0748.2	1.65926e-95	-1.3304	0.264	0.545	1.05031e-92	YY2
MA1544.1	7.63482e-95	-1.37115	0.25	0.549	4.83284e-92	OVOL1
MA0686.1	4.05211e-115	-1.50761	0.251	0.556	2.56499e-112	SPDEF
MA0051.1	1.96145e-05	-1.5157	0.378	0.463	0.012416	IRF2
MA0141.3	0.275178	-1.51728	0.436	0.431	1	ESRRB
MA0684.2	2.48826e-89	-1.75401	0.247	0.538	1.57507e-86	RUNX3
MA0511.2	2.66134e-99	-1.87123	0.24	0.543	1.68463e-96	RUNX2
MA0139.1	2.07032e-232	-1.91193	0.169	0.567	1.31051e-229	CTCF
MA0692.1	1.74496e-38	-1.95951	0.294	0.465	1.10456e-35	TFEB
MA1419.1	1.42914e-41	-2.08939	0.294	0.519	9.04648e-39	IRF4
MA0093.3	0.670359	-2.09613	0.42	0.423	1	USF1
MA0620.3	7.33447e-45	-2.11281	0.29	0.468	4.64272e-42	MITF
MA0831.2	8.46288e-34	-2.16446	0.294	0.464	5.357e-31	TFE3
MA0652.1	4.23379e-30	-2.1763	0.303	0.495	2.67999e-27	IRF8
MA0028.2	1.93639e-172	-2.21	0.157	0.577	1.22574e-169	ELK1
MA0653.1	1.56666e-28	-2.24368	0.315	0.506	9.91698e-26	IRF9
MA0160.1	1.88311e-12	-2.28372	0.339	0.445	1.19201e-09	NR4A2
MA0050.2	7.931e-15	-2.29234	0.328	0.416	5.02033e-12	IRF1
MA0759.1	1.83788e-198	-2.3412	0.131	0.582	1.16338e-195	ELK3
MA1652.1	1.25832e-09	-2.39791	0.317	0.392	7.96517e-07	ZKSCAN5
MA0526.3	0.888757	-2.4062	0.414	0.415	1	USF2
MA1483.1	4.56717e-231	-2.71413	0.114	0.603	2.89102e-228	ELF2
MA0763.1	2.91962e-242	-2.73995	0.109	0.603	1.84812e-239	ETV3
MA1112.2	8.16723e-73	-2.75225	0.216	0.486	5.16986e-70	NR4A1
MA0101.1	4.23954e-08	-2.75501	0.487	0.467	2.68363e-05	REL
MA0750.2	7.79632e-274	-2.86408	0.076	0.621	4.93507e-271	ZBTB7A
MA1418.1	9.63563e-23	-2.86832	0.301	0.439	6.09936e-20	IRF3
MA0107.1	7.42916e-10	-2.87731	0.488	0.46	4.70266e-07	RELA
MA1111.1	6.1197e-23	-3.07713	0.292	0.431	3.87377e-20	NR2F2
MA0156.2	1.72011e-260	-3.11779	0.088	0.611	1.08883e-257	FEV
MA0641.1	1.61192e-250	-3.32087	0.092	0.6	1.02035e-247	ELF4
MA0475.2	8.47069e-266	-3.33607	0.087	0.629	5.36195e-263	FLI1
MA1484.1	4.86005e-279	-3.4198	0.078	0.614	3.07641e-276	ETS2
MA0098.3	2.22767e-277	-3.42539	0.067	0.62	1.41012e-274	ETS1
MA0517.1	3.78964e-25	-3.44127	0.263	0.406	2.39884e-22	STAT1::STAT2
MA0076.2	4.22928e-301	-3.58068	0.054	0.642	2.67713e-298	ELK4
MA0474.2	1.53681e-290	-3.68507	0.073	0.63	9.72803e-288	ERG
MA0765.2	1.35959e-284	-3.76652	0.06	0.625	8.60619e-282	ETV5
MA0762.1	1.54455e-301	-3.91237	0.06	0.62	9.77701e-299	ETV2
MA0760.1	0	-3.98463	0.06	0.631	2.88904e-308	ERF
MA0764.2	3.57671e-184	-5.31275	0.088	0.45	2.26406e-181	ETV4
MA0761.2	2.46486e-294	-6.10059	0.045	0.536	1.56026e-291	ETV1
MA0473.3	9.90078e-267	-6.77224	0.045	0.503	6.2672e-264	ELF1
MA0136.2	1.75321e-247	-6.80558	0.063	0.513	1.10978e-244	ELF5
MA0062.3	1.65204e-283	-6.95725	0.041	0.525	1.04574e-280	GABPA
MA0645.1	5.13956e-302	-6.9623	0.037	0.583	3.25334e-299	ETV6
MA1508.1	1.60384e-171	-7.13205	0.075	0.399	1.01523e-168	IKZF1
MA0640.2	7.48949e-232	-9.05637	0.044	0.442	4.74085e-229	ELF3
MA0080.5	3.23906e-131	-10.1663	0.051	0.313	2.05033e-128	SPI1
MA0598.3	8.44689e-263	-11.8335	0.028	0.452	5.34688e-260	EHF
MA0687.1	1.16987e-133	-12.1276	0.065	0.312	7.40527e-131	SPIC
MA0081.2	1.24864e-204	-12.3089	0.032	0.326	7.9039e-202	SPIB

## Sheet: Basal2
	p_val	avg_log2FC	pct.1	pct.2	p_val_adj	gene
MA0489.1	5.84385e-307	4.32511	0.997	0.395	3.69916e-304	JUN(var.2)
MA1137.1	2.13598e-300	4.02112	0.996	0.394	1.35208e-297	FOSL1::JUNB
MA0477.2	1.51136e-306	3.99093	0.999	0.394	9.56689e-304	FOSL1
MA1128.1	6.45731e-305	3.94773	0.999	0.395	4.08748e-302	FOSL1::JUN
MA1132.1	1.52119e-294	3.8428	0.991	0.394	9.62911e-292	JUN::JUNB
MA1144.1	6.12708e-306	3.79164	0.999	0.39	3.87844e-303	FOSL2::JUND
MA1142.1	7.16905e-296	3.71874	0.999	0.394	4.53801e-293	FOSL1::JUND
MA0478.1	0	3.70059	0.999	0.397	2.15865e-306	FOSL2
MA0490.2	3.19879e-303	3.67876	0.996	0.392	2.02483e-300	JUNB
MA0655.1	3.22173e-300	3.61335	0.999	0.39	2.03936e-297	JDP2
MA1135.1	2.91783e-301	3.61006	0.997	0.393	1.84699e-298	FOSB::JUNB
MA0491.2	8.90029e-297	3.55334	0.997	0.394	5.63388e-294	JUND
MA1138.1	3.11803e-303	3.54676	0.999	0.393	1.97371e-300	FOSL2::JUNB
MA1134.1	1.33622e-305	3.48789	0.999	0.394	8.45826e-303	FOS::JUNB
MA0099.3	2.29569e-301	3.38588	0.999	0.395	1.45317e-298	FOS::JUN
MA1130.1	2.23465e-307	3.14604	0.999	0.393	1.41453e-304	FOSL2::JUN
MA0841.1	1.33345e-287	3.1373	0.995	0.403	8.44077e-285	NFE2
MA1101.2	9.42583e-281	3.0374	0.996	0.398	5.96655e-278	BACH2
MA0476.1	0	3.02048	0.999	0.398	3.09224e-308	FOS
MA1634.1	5.44482e-303	2.95277	0.996	0.4	3.44657e-300	BATF
MA0462.2	1.73772e-302	2.8085	0.996	0.399	1.09998e-299	BATF::JUN
MA0089.2	2.35607e-246	2.77723	0.98	0.447	1.49139e-243	NFE2L1
MA0835.2	5.06041e-302	2.76523	0.996	0.4	3.20324e-299	BATF3
MA0809.2	6.46077e-259	2.59524	0.989	0.429	4.08967e-256	TEAD4
MA0090.3	5.58864e-259	2.58719	0.98	0.435	3.53761e-256	TEAD1
MA0808.1	1.5314e-258	2.58174	0.988	0.428	9.69378e-256	TEAD3
MA1141.1	0	2.41236	1	0.398	2.11509e-306	FOS::JUND
MA1121.1	5.98013e-242	2.33194	0.983	0.432	3.78542e-239	TEAD2
MA0501.1	1.06857e-204	2.24413	0.964	0.448	6.76407e-202	MAF::NFE2
MA0003.4	2.87885e-238	2.16848	0.96	0.415	1.82231e-235	TFAP2A
MA0524.2	1.33037e-215	2.08314	0.933	0.419	8.42127e-213	TFAP2C
MA0811.1	7.39251e-218	2.04435	0.932	0.423	4.67946e-215	TFAP2B
MA1643.1	2.78192e-162	1.93011	0.928	0.454	1.76095e-159	NFIB
MA1528.1	2.00411e-173	1.83507	0.93	0.442	1.2686e-170	NFIX(var.2)
MA0810.1	1.60137e-206	1.81498	0.941	0.431	1.01367e-203	TFAP2A(var.2)
MA0670.1	4.63491e-120	1.80948	0.867	0.444	2.9339e-117	NFIA
MA0161.2	5.92903e-165	1.75998	0.922	0.44	3.75307e-162	NFIC
MA0812.1	2.09273e-180	1.66082	0.924	0.437	1.3247e-177	TFAP2B(var.2)
MA0814.2	2.04739e-180	1.53672	0.924	0.43	1.296e-177	TFAP2C(var.2)
MA1569.1	4.57845e-153	1.46485	0.908	0.439	2.89816e-150	TFAP2E
MA0154.4	1.02728e-163	1.4558	0.933	0.458	6.50269e-161	EBF1
MA1639.1	9.09559e-129	1.376	0.85	0.433	5.75751e-126	MEIS1(var.2)
MA1527.1	9.2026e-148	1.37066	0.928	0.457	5.82525e-145	NFIC(var.2)
MA1116.1	6.26213e-151	1.35677	0.916	0.476	3.96393e-148	RBPJ
MA1637.1	3.29203e-142	1.33307	0.886	0.452	2.08386e-139	EBF3
MA0815.1	1.42876e-122	1.30511	0.838	0.451	9.04405e-120	TFAP2C(var.3)
MA0671.1	2.39186e-121	1.30086	0.871	0.446	1.51405e-118	NFIX
MA0496.3	2.61073e-155	1.27384	0.95	0.442	1.65259e-152	MAFK
MA0813.1	6.43399e-116	1.272	0.839	0.452	4.07272e-113	TFAP2B(var.3)
MA0103.3	1.22713e-142	1.25166	0.924	0.438	7.76771e-140	ZEB1
MA0597.1	4.38376e-111	1.24675	0.845	0.446	2.77492e-108	THAP1
MA1557.1	5.23441e-47	1.22866	0.704	0.457	3.31338e-44	SMAD5
MA0872.1	6.69165e-112	1.20885	0.829	0.457	4.23582e-109	TFAP2A(var.3)
MA1124.1	9.69573e-94	1.18745	0.803	0.453	6.1374e-91	ZNF24
MA0743.2	4.19371e-98	1.18457	0.814	0.449	2.65462e-95	SCRT1
MA1529.1	4.16768e-106	1.1443	0.835	0.448	2.63814e-103	NHLH2
MA0119.1	4.12742e-108	1.14112	0.885	0.46	2.61266e-105	NFIC::TLX1
MA1520.1	3.46965e-94	1.13715	0.822	0.45	2.19629e-91	MAF
MA1100.2	2.32201e-105	1.13559	0.834	0.447	1.46983e-102	ASCL1
MA1113.2	1.8021e-112	1.11	0.839	0.429	1.14073e-109	PBX2
MA0513.1	2.60361e-104	1.08596	0.839	0.457	1.64809e-101	SMAD2::SMAD3::SMAD4
MA1640.1	4.13577e-91	1.08484	0.807	0.445	2.61794e-88	MEIS2(var.2)
MA1521.1	2.83345e-88	1.06204	0.81	0.452	1.79358e-85	MAFA
MA1473.1	9.38992e-77	1.02147	0.786	0.444	5.94382e-74	CDX4
MA0890.1	1.39107e-68	1.01161	0.77	0.446	8.80545e-66	GBX2
MA0744.2	4.03878e-69	0.999692	0.758	0.449	2.55655e-66	SCRT2
MA0886.1	1.94472e-79	0.996324	0.788	0.45	1.23101e-76	EMX2
MA1635.1	2.42171e-97	0.995363	0.843	0.452	1.53294e-94	BHLHE22(var.2)
MA0648.1	4.98043e-64	0.995202	0.736	0.456	3.15261e-61	GSC
MA1472.1	1.13193e-94	0.991601	0.822	0.447	7.16512e-92	BHLHA15(var.2)
MA1117.1	2.15269e-98	0.989743	0.838	0.443	1.36265e-95	RELB
MA1656.1	6.67083e-81	0.976447	0.803	0.464	4.22264e-78	ZNF449
MA0902.2	1.407e-65	0.974287	0.726	0.449	8.90634e-63	HOXB2
MA0499.2	8.93263e-89	0.969388	0.814	0.462	5.65435e-86	MYOD1
MA1648.1	3.99747e-102	0.958031	0.85	0.465	2.5304e-99	TCF12(var.2)
MA1497.1	7.79004e-68	0.952006	0.747	0.449	4.9311e-65	HOXA6
MA1631.1	3.19983e-102	0.950012	0.863	0.456	2.02549e-99	ASCL1(var.2)
MA0887.1	4.23513e-62	0.947979	0.738	0.449	2.68084e-59	EVX1
MA0731.1	2.08185e-78	0.935346	0.786	0.45	1.31781e-75	BCL6B
MA0820.1	1.01685e-98	0.934976	0.842	0.448	6.43667e-96	FIGLA
MA1599.1	1.13101e-87	0.928078	0.799	0.454	7.1593e-85	ZNF682
MA0830.2	1.28464e-106	0.92356	0.88	0.46	8.13178e-104	TCF4
MA0878.2	1.44658e-72	0.92062	0.776	0.45	9.15685e-70	CDX1
MA1641.1	1.00702e-84	0.916873	0.805	0.442	6.37442e-82	MYF5
MA0075.3	1.34955e-57	0.913525	0.738	0.451	8.54265e-55	PRRX2
MA0888.1	7.45757e-61	0.911262	0.754	0.453	4.72064e-58	EVX2
MA1579.1	5.52413e-98	0.908573	0.871	0.456	3.49677e-95	ZBTB26
MA0795.1	3.75074e-47	0.908266	0.696	0.461	2.37422e-44	SMAD3
MA0726.1	4.40154e-60	0.900538	0.748	0.454	2.78618e-57	VSX2
MA0138.2	9.41699e-74	0.899393	0.771	0.456	5.96095e-71	REST
MA0913.2	1.13522e-61	0.892612	0.772	0.451	7.18596e-59	HOXD9
MA0048.2	3.24087e-73	0.890118	0.788	0.456	2.05147e-70	NHLH1
MA1649.1	1.43783e-71	0.889051	0.787	0.451	9.10148e-69	ZBTB12
MA1601.1	5.39585e-76	0.880946	0.798	0.452	3.41557e-73	ZNF75D
MA0793.1	3.72552e-71	0.880513	0.772	0.454	2.35826e-68	POU6F2
MA0891.1	1.56052e-53	0.880357	0.716	0.46	9.87811e-51	GSC2
MA0894.1	4.86162e-60	0.867152	0.735	0.446	3.0774e-57	HESX1
MA1654.1	2.21507e-79	0.864568	0.823	0.465	1.40214e-76	ZNF16
MA0725.1	1.51988e-65	0.864483	0.771	0.452	9.62084e-63	VSX1
MA0644.1	2.50672e-57	0.859293	0.732	0.446	1.58676e-54	ESX1
MA0875.1	7.36233e-49	0.856333	0.716	0.45	4.66036e-46	BARX1
MA0899.1	1.07444e-60	0.851375	0.739	0.456	6.80122e-58	HOXA10
MA0522.3	5.2294e-87	0.846186	0.826	0.471	3.31021e-84	TCF3
MA1501.1	4.2466e-52	0.834361	0.732	0.452	2.6881e-49	HOXB7
MA0665.1	1.02794e-47	0.834236	0.707	0.453	6.50689e-45	MSC
MA0892.1	5.3172e-57	0.823328	0.74	0.453	3.36579e-54	GSX1
MA0909.2	1.74253e-46	0.817358	0.689	0.454	1.10302e-43	HOXD13
MA0500.2	1.30726e-72	0.807557	0.801	0.446	8.27495e-70	MYOG
MA0706.1	5.88668e-59	0.80414	0.754	0.455	3.72627e-56	MEOX2
MA1499.1	2.13971e-51	0.803232	0.719	0.455	1.35444e-48	HOXB4
MA1507.1	2.13971e-51	0.803232	0.719	0.455	1.35444e-48	HOXD4
MA0710.1	1.33149e-55	0.784885	0.728	0.452	8.42832e-53	NOTO
MA0106.3	2.55499e-161	0.781553	0.977	0.371	1.61731e-158	TP53
MA0468.1	1.68316e-51	0.778584	0.727	0.452	1.06544e-48	DUX4
MA0642.1	1.69591e-48	0.775953	0.723	0.455	1.07351e-45	EN2
MA1549.1	1.3737e-54	0.770179	0.708	0.46	8.69554e-52	POU6F1(var.2)
MA0068.2	2.52308e-40	0.767664	0.685	0.464	1.59711e-37	PAX4
MA1518.1	4.29099e-47	0.760244	0.727	0.458	2.7162e-44	LHX1
MA0668.1	1.09018e-36	0.756811	0.651	0.457	6.90086e-34	NEUROD2
MA0722.1	6.19519e-56	0.751502	0.751	0.456	3.92155e-53	VAX1
MA0723.1	6.19519e-56	0.751502	0.751	0.456	3.92155e-53	VAX2
MA0903.1	2.80785e-60	0.750683	0.764	0.447	1.77737e-57	HOXB3
MA0650.2	7.4841e-59	0.749422	0.75	0.453	4.73743e-56	HOXA13
MA0889.1	2.37717e-51	0.741498	0.728	0.456	1.50475e-48	GBX1
MA0618.1	6.95162e-50	0.737892	0.715	0.447	4.40038e-47	LBX1
MA1568.1	3.50044e-35	0.735143	0.665	0.444	2.21578e-32	TCF21(var.2)
MA0145.3	6.62269e-57	0.732069	0.748	0.448	4.19217e-54	TFCP2
MA0153.2	2.47055e-53	0.731675	0.74	0.457	1.56386e-50	HNF1B
MA1476.1	9.82596e-46	0.724184	0.707	0.46	6.21984e-43	DLX5
MA0658.1	5.83803e-48	0.723898	0.714	0.461	3.69547e-45	LHX6
MA0714.1	5.5364e-48	0.720006	0.734	0.457	3.50454e-45	PITX3
MA0783.1	1.30223e-41	0.718312	0.708	0.464	8.24313e-39	PKNOX2
MA0907.1	7.77746e-31	0.715528	0.657	0.469	4.92313e-28	HOXC13
MA0698.1	2.31727e-71	0.714956	0.788	0.46	1.46683e-68	ZBTB18
MA0683.1	3.16645e-60	0.712425	0.759	0.449	2.00437e-57	POU4F2
MA0158.2	2.00461e-51	0.712208	0.74	0.451	1.26892e-48	HOXA5
MA0027.2	2.27035e-40	0.709338	0.684	0.455	1.43713e-37	EN1
MA0699.1	3.15047e-49	0.708901	0.715	0.448	1.99425e-46	LBX2
MA1600.1	1.6418e-66	0.70268	0.78	0.449	1.03926e-63	ZNF684
MA0826.1	3.19223e-33	0.69681	0.66	0.464	2.02068e-30	OLIG1
MA1566.1	2.24546e-54	0.696571	0.738	0.473	1.42138e-51	TBX3
MA1575.1	4.23441e-55	0.694338	0.73	0.439	2.68038e-52	THRB(var.2)
MA1562.1	1.55016e-23	0.690022	0.663	0.465	9.81251e-21	SOX14
MA0612.2	2.26973e-37	0.68616	0.677	0.46	1.43674e-34	EMX1
MA0661.1	1.28458e-54	0.685352	0.743	0.46	8.13139e-52	MEOX1
MA0791.1	2.16861e-52	0.681079	0.731	0.446	1.37273e-49	POU4F3
MA1585.1	1.28254e-49	0.673509	0.726	0.463	8.11847e-47	ZKSCAN1
MA0914.1	1.68554e-37	0.667906	0.66	0.476	1.06695e-34	ISL2
MA1498.1	8.11401e-27	0.666963	0.636	0.467	5.13617e-24	HOXA7
MA1502.1	8.11401e-27	0.666963	0.636	0.467	5.13617e-24	HOXB8
MA0910.2	8.11401e-27	0.666963	0.636	0.467	5.13617e-24	HOXD8
MA0718.1	1.38383e-41	0.665879	0.722	0.459	8.75963e-39	RAX
MA0682.2	9.95385e-44	0.665392	0.712	0.465	6.30079e-41	PITX1
MA1638.1	1.70681e-63	0.660347	0.763	0.434	1.08041e-60	HAND2
MA0066.1	3.20771e-56	0.658621	0.754	0.444	2.03048e-53	PPARG
MA1467.1	5.89814e-74	0.657446	0.797	0.437	3.73352e-71	ATOH1(var.2)
MA0912.2	4.46115e-45	0.657335	0.726	0.463	2.82391e-42	HOXD3
MA0893.2	8.85814e-47	0.656153	0.735	0.454	5.6072e-44	GSX2
MA0703.2	9.17657e-38	0.650691	0.687	0.448	5.80877e-35	LMX1B
MA1506.1	1.1869e-28	0.649246	0.639	0.455	7.51306e-26	HOXD10
MA0700.2	4.61388e-40	0.647368	0.685	0.454	2.92059e-37	LHX2
MA1588.1	5.05286e-50	0.638041	0.719	0.445	3.19846e-47	ZNF136
MA0801.1	2.08525e-47	0.637434	0.736	0.478	1.31997e-44	MGA
MA0803.1	2.08525e-47	0.637434	0.736	0.478	1.31997e-44	TBX15
MA1496.1	6.65306e-27	0.6356	0.648	0.471	4.21139e-24	HOXA4
MA1577.1	1.38952e-44	0.63459	0.711	0.457	8.79564e-42	TLX2
MA0654.1	5.76221e-44	0.628375	0.712	0.458	3.64748e-41	ISX
MA0701.2	5.76221e-44	0.628375	0.712	0.458	3.64748e-41	LHX9
MA0707.1	6.27064e-27	0.622098	0.655	0.463	3.96932e-24	MNX1
MA0882.1	4.77828e-42	0.61416	0.711	0.46	3.02465e-39	DLX6
MA0088.2	2.49626e-38	0.614094	0.688	0.455	1.58013e-35	ZNF143
MA1463.1	2.58338e-37	0.606792	0.685	0.457	1.63528e-34	ARGFX
MA0818.1	1.15153e-21	0.604869	0.62	0.467	7.2892e-19	BHLHE22
MA0628.1	2.85601e-28	0.598898	0.676	0.464	1.80786e-25	POU6F1
MA0132.2	1.64653e-40	0.596427	0.704	0.455	1.04225e-37	PDX1
MA1481.1	1.64653e-40	0.596427	0.704	0.455	1.04225e-37	DRGX
MA0790.1	4.83361e-47	0.5947	0.724	0.459	3.05968e-44	POU4F1
MA0675.1	3.43259e-44	0.591276	0.705	0.445	2.17283e-41	NKX6-2
MA0719.1	2.90209e-42	0.587222	0.731	0.456	1.83702e-39	RHOXF1
MA1547.1	2.50772e-32	0.586985	0.679	0.462	1.58739e-29	PITX2
MA0817.1	2.12558e-26	0.586917	0.655	0.464	1.34549e-23	BHLHE23
MA0712.2	7.84365e-33	0.586836	0.672	0.464	4.96503e-30	OTX2
MA0130.1	3.50876e-53	0.583126	0.766	0.452	2.22104e-50	ZNF354C
MA1155.1	2.6544e-48	0.580038	0.747	0.466	1.68023e-45	ZSCAN4
MA0884.1	3.9128e-38	0.577334	0.7	0.46	2.4768e-35	DUXA
MA1567.1	5.90535e-39	0.572124	0.704	0.479	3.73809e-36	TBX6
MA0159.1	2.90758e-44	0.567683	0.732	0.453	1.8405e-41	RARA::RXRA
MA0077.1	9.13742e-42	0.56713	0.708	0.456	5.78399e-39	SOX9
MA0666.1	2.48093e-34	0.564426	0.685	0.468	1.57043e-31	MSX1
MA0708.1	2.48093e-34	0.564426	0.685	0.468	1.57043e-31	MSX2
MA0876.1	2.48093e-34	0.564426	0.685	0.468	1.57043e-31	BSX
MA0674.1	1.41393e-39	0.56321	0.705	0.458	8.95018e-37	NKX6-1
MA0805.1	1.44911e-39	0.555912	0.715	0.475	9.17287e-37	TBX1
MA0806.1	2.24391e-41	0.551581	0.711	0.482	1.4204e-38	TBX4
MA0807.1	2.24391e-41	0.551581	0.711	0.482	1.4204e-38	TBX5
MA0863.1	9.91205e-22	0.545244	0.618	0.472	6.27433e-19	MTF1
MA0867.2	1.13119e-47	0.544517	0.742	0.452	7.16044e-45	SOX4
MA1495.1	1.15835e-34	0.543023	0.701	0.462	7.33235e-32	HOXA1
MA0900.2	1.15835e-34	0.543023	0.701	0.462	7.33235e-32	HOXA2
MA0752.1	1.85086e-18	0.534266	0.631	0.464	1.17159e-15	ZNF410
MA1530.1	9.92585e-36	0.534079	0.695	0.466	6.28306e-33	NKX6-3
MA0630.1	4.62338e-38	0.528667	0.684	0.457	2.9266e-35	SHOX
MA0717.1	4.62338e-38	0.528667	0.684	0.457	2.9266e-35	RAX2
MA1558.1	9.69812e-58	0.528255	0.786	0.483	6.13891e-55	SNAI1
MA1519.1	1.25408e-35	0.52691	0.687	0.458	7.93831e-33	LHX5
MA0738.1	1.63966e-42	0.52275	0.736	0.462	1.03791e-39	HIC2
MA0623.2	4.27943e-21	0.510533	0.641	0.464	2.70888e-18	NEUROG1
MA0716.1	3.59187e-27	0.507806	0.655	0.462	2.27365e-24	PRRX1
MA0721.1	3.59187e-27	0.507806	0.655	0.462	2.27365e-24	UNCX
MA0634.1	3.29288e-28	0.503459	0.665	0.453	2.08439e-25	ALX3
MA1123.2	1.21478e-62	0.498236	0.772	0.429	7.68955e-60	TWIST1
MA1563.1	1.66987e-36	0.496136	0.701	0.464	1.05703e-33	SOX18
MA0737.1	1.47519e-21	0.495591	0.631	0.458	9.33793e-19	GLIS3
MA1105.2	1.2481e-85	0.494319	0.841	0.426	7.90048e-83	GRHL2
MA0155.1	2.37867e-38	0.493409	0.714	0.441	1.5057e-35	INSM1
MA1480.1	3.22438e-24	0.492009	0.641	0.466	2.04103e-21	DPRX
MA0827.1	5.94854e-21	0.4899	0.628	0.461	3.76543e-18	OLIG3
MA0796.1	5.94728e-26	0.48733	0.66	0.473	3.76463e-23	TGIF1
MA1504.1	1.04696e-32	0.48708	0.683	0.466	6.62727e-30	HOXC4
MA1106.1	1.23357e-26	0.479602	0.649	0.473	7.80848e-24	HIF1A
MA1485.1	6.85232e-26	0.476274	0.664	0.466	4.33752e-23	FERD3L
MA0770.1	1.09064e-55	0.475853	0.768	0.426	6.90376e-53	HSF2
MA0465.2	2.80853e-28	0.474048	0.665	0.454	1.7778e-25	CDX2
MA0596.1	1.01709e-35	0.473924	0.711	0.455	6.43819e-33	SREBF2
MA0873.1	4.46102e-16	0.473165	0.622	0.467	2.82383e-13	HOXD12
MA1493.1	7.16834e-20	0.469333	0.643	0.463	4.53756e-17	HES6
MA0646.1	6.46803e-22	0.465985	0.621	0.471	4.09426e-19	GCM1
MA0113.3	4.50843e-31	0.465373	0.7	0.452	2.85384e-28	NR3C1
MA1109.1	3.08712e-51	0.464521	0.763	0.431	1.95415e-48	NEUROD1
MA1500.1	1.2003e-23	0.460659	0.652	0.467	7.5979e-21	HOXB6
MA0463.2	2.61446e-35	0.460501	0.727	0.46	1.65495e-32	BCL6
MA1548.1	6.97497e-26	0.460066	0.653	0.452	4.41516e-23	PLAGL2
MA1592.1	2.22507e-36	0.458754	0.688	0.443	1.40847e-33	ZNF274
MA0691.1	6.38112e-36	0.457941	0.696	0.452	4.03925e-33	TFAP4
MA0702.2	2.77984e-33	0.456421	0.668	0.448	1.75964e-30	LMX1A
MA1524.1	5.19454e-18	0.452224	0.614	0.46	3.28814e-15	MSGN1
MA0689.1	2.34668e-24	0.446518	0.64	0.479	1.48545e-21	TBX20
MA0901.2	5.41234e-29	0.445357	0.659	0.458	3.42601e-26	HOXB13
MA1597.1	6.23127e-53	0.444756	0.763	0.453	3.9444e-50	ZNF528
MA1149.1	7.0044e-30	0.441546	0.661	0.444	4.43379e-27	RARA::RXRG
MA0662.1	5.91266e-22	0.435294	0.639	0.463	3.74272e-19	MIXL1
MA0669.1	8.55755e-23	0.43461	0.636	0.456	5.41693e-20	NEUROG2
MA0690.1	5.80336e-24	0.433533	0.643	0.474	3.67353e-21	TBX21
MA0724.1	6.78049e-18	0.433506	0.606	0.475	4.29205e-15	VENTX
MA1120.1	1.2589e-36	0.427052	0.712	0.461	7.96885e-34	SOX13
MA0904.2	1.28842e-20	0.422432	0.655	0.472	8.15569e-18	HOXB5
MA0038.2	3.00653e-43	0.417873	0.754	0.466	1.90313e-40	GFI1
MA0730.1	1.4619e-39	0.417759	0.719	0.44	9.25386e-37	RARA(var.2)
MA1505.1	1.67853e-20	0.417403	0.64	0.461	1.06251e-17	HOXC8
MA0797.1	7.59551e-22	0.416646	0.649	0.471	4.80795e-19	TGIF2
MA0868.2	7.20404e-32	0.41618	0.668	0.455	4.56016e-29	SOX8
MA1655.1	4.91588e-41	0.414703	0.724	0.464	3.11175e-38	ZNF341
MA0258.2	7.4889e-40	0.41462	0.714	0.436	4.74047e-37	ESR2
MA0866.1	1.71358e-23	0.412345	0.668	0.472	1.0847e-20	SOX21
MA0688.1	3.38479e-20	0.40879	0.627	0.476	2.14257e-17	TBX2
MA0091.1	2.73714e-37	0.407594	0.692	0.441	1.73261e-34	TAL1::TCF3
MA1581.1	7.07038e-35	0.407473	0.707	0.463	4.47555e-32	ZBTB6
MA0667.1	1.9593e-18	0.406901	0.617	0.454	1.24023e-15	MYF6
MA1114.1	1.02349e-32	0.404082	0.701	0.46	6.47869e-30	PBX3
MA0595.1	1.5599e-29	0.403833	0.687	0.464	9.87416e-27	SREBF1
MA0802.1	7.22855e-23	0.399112	0.652	0.479	4.57567e-20	TBR1
MA0070.1	8.03238e-12	0.395208	0.59	0.485	5.0845e-09	PBX1
MA0906.1	9.21673e-08	0.39343	0.558	0.474	5.83419e-05	HOXC12
MA0678.1	9.90472e-14	0.388321	0.59	0.469	6.26969e-11	OLIG2
MA0647.1	1.75512e-51	0.388303	0.75	0.444	1.11099e-48	GRHL1
MA1602.1	1.92128e-15	0.385822	0.604	0.468	1.21617e-12	ZSCAN29
MA1511.1	5.48891e-32	0.384069	0.712	0.458	3.47448e-29	KLF10
MA1642.1	2.96189e-45	0.381742	0.735	0.435	1.87487e-42	NEUROG2(var.2)
MA0771.1	7.53815e-37	0.376207	0.71	0.444	4.77165e-34	HSF4
MA0036.3	1.55919e-12	0.373242	0.596	0.467	9.86965e-10	GATA2
MA0152.1	1.04456e-49	0.372866	0.764	0.436	6.61207e-47	NFATC2
MA1532.1	4.1692e-24	0.372082	0.639	0.452	2.6391e-21	NR1D2
MA0610.1	5.2719e-15	0.371455	0.618	0.473	3.33711e-12	DMRT3
MA1633.1	2.55101e-281	0.369803	0.996	0.428	1.61479e-278	BACH1
MA0778.1	4.76216e-42	0.369326	0.727	0.445	3.01445e-39	NFKB2
MA0259.1	2.61603e-16	0.366782	0.604	0.471	1.65595e-13	ARNT::HIF1A
MA0009.2	1.46719e-12	0.36146	0.609	0.488	9.28733e-10	TBXT
MA1646.1	1.07663e-35	0.359422	0.71	0.456	6.81507e-33	OSR2
MA0046.2	1.86639e-20	0.359402	0.653	0.465	1.18143e-17	HNF1A
MA1119.1	3.46829e-23	0.358833	0.657	0.468	2.19542e-20	SIX2
MA0143.4	2.08771e-24	0.352117	0.657	0.453	1.32152e-21	SOX2
MA0679.2	6.7382e-17	0.351741	0.624	0.464	4.26528e-14	ONECUT1
MA0485.2	1.01072e-09	0.341954	0.568	0.479	6.39789e-07	HOXC9
MA0651.1	9.35705e-10	0.338305	0.604	0.472	5.92301e-07	HOXC11
MA1533.1	7.78969e-23	0.333871	0.664	0.457	4.93087e-20	NR1I2
MA0745.2	2.93675e-41	0.330361	0.752	0.484	1.85896e-38	SNAI2
MA0775.1	6.73937e-19	0.326401	0.632	0.469	4.26602e-16	MEIS3
MA0727.1	3.32638e-22	0.319903	0.648	0.456	2.1056e-19	NR3C2
MA0766.2	1.58134e-11	0.316346	0.584	0.476	1.00099e-08	GATA5
MA1565.1	3.88088e-23	0.311319	0.661	0.485	2.4566e-20	TBX18
MA0486.2	8.98456e-43	0.311031	0.719	0.434	5.68723e-40	HSF1
MA0819.1	3.00195e-11	0.310532	0.605	0.467	1.90024e-08	CLOCK
MA1553.1	4.20238e-17	0.308135	0.632	0.467	2.66011e-14	RARG(var.3)
MA1583.1	1.74274e-10	0.304427	0.6	0.485	1.10315e-07	ZFP57
MA1560.1	3.46074e-08	0.303319	0.585	0.468	2.19065e-05	SOHLH2
MA1503.1	2.414e-08	0.299743	0.589	0.478	1.52806e-05	HOXB9
MA1468.1	3.43063e-18	0.291141	0.625	0.448	2.17159e-15	ATOH7
MA1571.1	2.40018e-15	0.287708	0.635	0.468	1.51931e-12	TGIF2LX
MA0502.2	3.08564e-08	0.28172	0.578	0.489	1.95321e-05	NFYB
MA1572.1	1.56461e-14	0.281192	0.622	0.475	9.90399e-12	TGIF2LY
MA0039.4	4.27265e-25	0.278586	0.675	0.466	2.70459e-22	KLF4
MA0680.1	6.6833e-14	0.277661	0.622	0.465	4.23053e-11	PAX7
MA1108.2	2.27853e-37	0.277595	0.724	0.453	1.44231e-34	MXI1
MA0479.1	4.38862e-15	0.276767	0.616	0.468	2.77799e-12	FOXH1
MA1645.1	1.10818e-21	0.276211	0.652	0.459	7.0148e-19	NKX2-2
MA0599.1	2.96006e-20	0.273006	0.636	0.463	1.87372e-17	KLF5
MA1576.1	4.23548e-30	0.271358	0.687	0.444	2.68106e-27	THRB(var.3)
MA0905.1	6.74087e-06	0.270696	0.548	0.48	0.00426697	HOXC10
MA0713.1	3.84271e-12	0.257784	0.59	0.474	2.43243e-09	PHOX2A
MA0767.1	2.19459e-08	0.257695	0.58	0.474	1.38918e-05	GCM2
MA0800.1	1.46917e-11	0.255764	0.586	0.48	9.29986e-09	EOMES
MA1494.1	1.99107e-17	0.253942	0.621	0.458	1.26034e-14	HNF4A(var.2)
MA1552.1	1.65687e-10	0.252664	0.6	0.474	1.0488e-07	RARB(var.3)
MA1118.1	4.53674e-11	0.246531	0.616	0.474	2.87176e-08	SIX1
MA0037.3	5.21188e-06	0.244899	0.552	0.471	0.00329912	GATA3
MA1559.1	2.66701e-31	0.242796	0.715	0.492	1.68822e-28	SNAI3
MA0030.1	1.46267e-12	0.242391	0.616	0.474	9.25867e-10	FOXF2
MA0525.2	2.24239e-131	0.240184	0.948	0.372	1.41943e-128	TP63
MA0469.3	0.000353805	0.237088	0.542	0.487	0.223959	E2F3
MA1514.1	1.39381e-17	0.236096	0.639	0.454	8.82281e-15	KLF17
MA1107.2	1.73505e-17	0.235322	0.644	0.466	1.09829e-14	KLF9
MA0069.1	2.49497e-13	0.232695	0.61	0.471	1.57932e-10	PAX6
MA0672.1	5.25624e-12	0.231767	0.602	0.462	3.3272e-09	NKX2-3
MA0139.1	1.026e-11	0.230121	0.581	0.453	6.4946e-09	CTCF
MA1593.1	3.32472e-32	0.228019	0.701	0.441	2.10455e-29	ZNF317
MA0105.4	6.93152e-25	0.219546	0.668	0.448	4.38765e-22	NFKB1
MA0144.2	2.04112e-46	0.211529	0.782	0.448	1.29203e-43	STAT3
MA0442.2	1.86693e-14	0.209018	0.61	0.45	1.18176e-11	SOX10
MA0780.1	3.78083e-10	0.206319	0.592	0.469	2.39326e-07	PAX3
MA1479.1	5.86126e-09	0.197168	0.592	0.469	3.71018e-06	DMRTC2
MA0056.2	6.86855e-37	0.196123	0.699	0.428	4.34779e-34	MZF1
MA0758.1	0.000416564	0.18873	0.546	0.47	0.263685	E2F7
MA1531.1	8.19851e-18	0.187223	0.641	0.459	5.18966e-15	NR1D1
MA0140.2	2.89331e-09	0.18492	0.593	0.474	1.83147e-06	GATA1::TAL1
MA0673.1	3.60307e-11	0.18372	0.588	0.467	2.28074e-08	NKX2-8
MA1580.1	3.25188e-05	0.177269	0.574	0.488	0.0205844	ZBTB32
MA0074.1	6.80173e-09	0.169272	0.584	0.465	4.3055e-06	RXRA::VDR
MA1522.1	1.22623e-20	0.165833	0.676	0.433	7.76206e-18	MAZ
MA0798.2	0.000218079	0.165684	0.553	0.479	0.138044	RFX3
MA1657.1	3.9351e-07	0.164802	0.562	0.468	0.000249092	ZNF652
MA1578.1	2.52331e-11	0.164071	0.594	0.442	1.59725e-08	VEZF1
MA0635.1	6.11127e-06	0.162302	0.572	0.475	0.00386843	BARHL2
MA0482.2	0.000432802	0.158415	0.527	0.479	0.273964	GATA4
MA0779.1	4.54706e-06	0.144739	0.548	0.467	0.00287829	PAX1
MA0697.1	1.57357e-08	0.142311	0.57	0.466	9.96068e-06	ZIC3
MA1104.2	3.09221e-06	0.141081	0.577	0.478	0.00195737	GATA6
MA1539.1	5.36184e-21	0.137964	0.653	0.444	3.39404e-18	NR2F6(var.3)
MA1523.1	3.46482e-11	0.136881	0.606	0.458	2.19323e-08	MSANTD3
MA0753.2	2.23295e-08	0.133154	0.566	0.454	1.41346e-05	ZNF740
MA0035.4	0.000105828	0.132086	0.545	0.473	0.066989	GATA1
MA0736.1	3.67445e-12	0.12794	0.602	0.446	2.32593e-09	GLIS2
MA1594.1	9.7501e-07	0.126588	0.574	0.464	0.000617181	ZNF382
MA1534.1	0.000404381	0.105634	0.533	0.469	0.255973	NR1I3
MA0784.1	0.000793652	0.10379	0.538	0.484	0.502382	POU1F1
MA0696.1	0.000142757	0.102629	0.55	0.467	0.0903653	ZIC1
MA0057.1	4.74205e-23	0.100323	0.672	0.422	3.00172e-20	MZF1(var.2)
MA0786.1	0.000347659	0.0987285	0.562	0.48	0.220068	POU3F1
MA0047.3	9.78653e-08	0.0962131	0.569	0.483	6.19488e-05	FOXA2
MA1573.1	5.55508e-09	0.0882583	0.582	0.475	3.51636e-06	THAP11
MA0804.1	0.00148986	0.0867359	0.542	0.481	0.943078	TBX19
MA1421.1	2.22657e-07	0.0754521	0.581	0.468	0.000140942	TCF7L1
MA1487.1	1.94623e-13	0.0752284	0.633	0.475	1.23197e-10	FOXE1
MA1584.1	0.0184884	0.0747788	0.533	0.472	1	ZIC5
MA0084.1	1.66132e-05	0.0723494	0.558	0.477	0.0105162	SRY
MA0100.3	4.38608e-06	0.069486	0.574	0.467	0.00277639	MYB
MA1683.1	2.6328e-06	0.0618169	0.574	0.477	0.00166656	FOXA3
MA1561.1	0.279031	0.0617688	0.509	0.476	1	SOX12
MA1489.1	0.0169264	0.0598991	0.522	0.479	1	FOXN3
MA0613.1	9.26499e-05	0.0581108	0.569	0.475	0.0586474	FOXG1
MA0908.1	0.453521	0.0561493	0.485	0.483	1	HOXD11
MA1154.1	1.06332e-13	0.0501977	0.609	0.449	6.73081e-11	ZNF282
MA0509.2	0.295937	0.0460468	0.502	0.494	1	RFX1
MA0895.1	0.161182	0.045496	0.497	0.479	1	HMBOX1
MA0715.1	0.000157944	0.0429717	0.577	0.469	0.0999784	PROP1
MA1147.1	0.000429121	0.0399107	0.534	0.461	0.271634	NR4A2::RXRA
MA1150.1	6.27233e-12	0.0343684	0.609	0.454	3.97039e-09	RORB
MA1589.1	8.73759e-11	0.0321907	0.614	0.461	5.5309e-08	ZNF140
MA0470.2	0.177921	0.0307727	0.51	0.49	1	E2F4
MA1517.1	1.18067e-10	0.0272837	0.631	0.465	7.47367e-08	KLF6
MA0032.2	0.000417474	0.0271826	0.572	0.48	0.264261	FOXC1
MA0788.1	0.0519611	0.0255749	0.523	0.484	1	POU3F3
MA0751.1	0.0218401	0.0236499	0.525	0.475	1	ZIC4
MA0782.2	2.12118e-09	0.0108887	0.62	0.466	1.34271e-06	PKNOX1
MA0787.1	0.121064	0.00886492	0.515	0.478	1	POU3F2
MA1470.1	0.614424	0.00708748	0.493	0.486	1	BACH2(var.2)
MA1512.1	0.438868	0.0047427	0.518	0.485	1	KLF11
MA1570.1	5.16225e-05	0.00368872	0.545	0.446	0.032677	TFAP4(var.2)
MA0735.1	0.00250389	0.00220562	0.56	0.47	1	GLIS1
MA1151.1	0.00261112	0.0011466	0.533	0.466	1	RORC
MA0769.2	0.0424003	-0.00290381	0.523	0.48	1	TCF7
MA0063.2	0.0299255	-0.00572909	0.529	0.468	1	NKX2-5
MA0847.2	2.41212e-07	-0.00702916	0.566	0.47	0.000152687	FOXD2
MA0774.1	0.040441	-0.00703314	0.541	0.47	1	MEIS2
MA0852.2	4.56997e-08	-0.00818912	0.6	0.471	2.89279e-05	FOXK1
MA0528.2	1.90944e-13	-0.0113177	0.631	0.462	1.20868e-10	ZNF263
MA0481.3	0.0014979	-0.0127974	0.548	0.484	0.94817	FOXP1
MA0498.2	0.0308188	-0.0145743	0.538	0.479	1	MEIS1
MA0839.1	0.570621	-0.0149336	0.477	0.481	1	CREB3L1
MA0114.4	1.84517e-23	-0.0191604	0.669	0.442	1.16799e-20	HNF4A
MA0781.1	0.0993038	-0.0222313	0.507	0.479	1	PAX9
MA0681.2	0.550675	-0.0256433	0.499	0.473	1	PHOX2B
MA1515.1	9.91097e-06	-0.033031	0.588	0.471	0.00627364	KLF2
MA0789.1	0.448416	-0.0342153	0.514	0.489	1	POU3F4
MA1478.1	0.309271	-0.0347162	0.514	0.476	1	DMRTA2
MA1542.1	0.151605	-0.0414301	0.506	0.489	1	OSR1
MA0842.2	1.64412e-08	-0.0474535	0.594	0.463	1.04073e-05	NRL
MA0083.3	0.428642	-0.0496024	0.498	0.463	1	SRF
MA0148.4	0.00246177	-0.0539636	0.565	0.48	1	FOXA1
MA0792.1	0.77428	-0.0593728	0.486	0.482	1	POU5F1B
MA0693.2	5.93927e-07	-0.0611692	0.581	0.471	0.000375956	VDR
MA0845.1	0.453936	-0.0615683	0.511	0.477	1	FOXB1
MA0593.1	0.00112114	-0.0625754	0.552	0.472	0.70968	FOXP2
MA1471.1	0.825423	-0.0638054	0.509	0.495	1	BARX2
MA0042.2	0.0368161	-0.0641263	0.542	0.48	1	FOXI1
MA0033.2	0.0368161	-0.0641263	0.542	0.48	1	FOXL1
MA0848.1	0.0368161	-0.0641263	0.542	0.48	1	FOXO4
MA0849.1	0.0368161	-0.0641263	0.542	0.48	1	FOXO6
MA0850.1	0.0368161	-0.0641263	0.542	0.48	1	FOXP3
MA0865.1	0.221318	-0.0665557	0.505	0.461	1	E2F8
MA0657.1	0.293047	-0.066574	0.515	0.494	1	KLF13
MA0659.2	8.89773e-15	-0.0674324	0.622	0.436	5.63226e-12	MAFG
MA0746.2	0.496071	-0.0729073	0.489	0.482	1	SP3
MA1516.1	1.71002e-09	-0.0733875	0.622	0.463	1.08244e-06	KLF3
MA1103.2	0.0572471	-0.0737494	0.538	0.479	1	FOXK2
MA0785.1	0.076791	-0.0827749	0.521	0.482	1	POU2F1
MA0829.2	0.000121275	-0.0847374	0.549	0.477	0.0767671	SREBF1(var.2)
MA0101.1	6.39373e-90	-0.0854988	0.863	0.406	4.04723e-87	REL
MA0484.2	1.94726e-21	-0.0867311	0.675	0.441	1.23261e-18	HNF4G
MA1148.1	1.83687e-13	-0.0903769	0.617	0.441	1.16274e-10	PPARA::RXRA
MA0104.4	0.00262941	-0.0910527	0.549	0.463	1	MYCN
MA0747.1	0.0290325	-0.0924535	0.452	0.49	1	SP8
MA0711.1	0.210459	-0.10162	0.465	0.492	1	OTX1
MA0768.1	0.902259	-0.101859	0.502	0.479	1	LEF1
MA0043.3	2.00237e-13	-0.112797	0.644	0.468	1.2675e-10	HLF
MA0147.3	0.0738097	-0.116385	0.519	0.457	1	MYC
MA0504.1	0.00019807	-0.117073	0.556	0.444	0.125378	NR2C2
MA0508.3	7.87776e-12	-0.117399	0.641	0.438	4.98662e-09	PRDM1
MA0492.1	3.53425e-12	-0.128558	0.604	0.44	2.23718e-09	JUND(var.2)
MA0734.2	0.000161127	-0.133694	0.57	0.454	0.101993	GLI2
MA0516.2	0.0430534	-0.134872	0.493	0.483	1	SP2
MA1509.1	0.260807	-0.139305	0.479	0.492	1	IRF6
MA0756.1	0.00255274	-0.142145	0.42	0.491	1	ONECUT2
MA0637.1	0.000561055	-0.147477	0.443	0.494	0.355148	CENPB
MA1538.1	3.27058e-13	-0.14748	0.613	0.441	2.07028e-10	NR2F1(var.3)
MA1555.1	0.0428775	-0.152879	0.53	0.472	1	RXRB(var.2)
MA0523.1	0.597181	-0.15331	0.51	0.487	1	TCF7L2
MA1546.1	0.0492146	-0.160524	0.462	0.49	1	PAX3(var.2)
MA0733.1	0.41062	-0.171755	0.469	0.456	1	EGR4
MA0754.1	0.00364123	-0.173158	0.463	0.492	1	CUX1
MA0031.1	0.260258	-0.174486	0.527	0.481	1	FOXD1
MA0157.2	0.260258	-0.174486	0.527	0.481	1	FOXO3
MA0757.1	0.0094279	-0.188242	0.442	0.487	1	ONECUT3
MA0471.2	0.0550456	-0.191914	0.474	0.449	1	E2F6
MA0823.1	0.589762	-0.192208	0.465	0.467	1	HEY1
MA0825.1	0.539389	-0.193039	0.478	0.474	1	MNT
MA0833.2	5.19034e-13	-0.196048	0.606	0.462	3.28549e-10	ATF4
MA0639.1	0.892586	-0.205206	0.487	0.475	1	DBP
MA0627.2	0.00926014	-0.208848	0.45	0.489	1	POU2F3
MA0163.1	0.203217	-0.212085	0.542	0.439	1	PLAG1
MA0072.1	0.184398	-0.216696	0.454	0.475	1	RORA(var.2)
MA0025.2	9.00125e-08	-0.217453	0.596	0.468	5.69779e-05	NFIL3
MA0495.3	1.56936e-05	-0.222026	0.558	0.454	0.00993406	MAFF
MA0507.1	0.0645743	-0.223997	0.456	0.485	1	POU2F2
MA0079.4	0.0229429	-0.224211	0.479	0.493	1	SP1
MA1115.1	0.0461811	-0.225531	0.474	0.481	1	POU5F1
MA1541.1	2.04928e-07	-0.229755	0.59	0.434	0.000129719	NR6A1
MA1146.1	0.00378594	-0.233447	0.533	0.459	1	NR1H4::RXRA
MA1644.1	1.94871e-05	-0.23483	0.432	0.516	0.0123353	NFYC
MA0024.3	0.00862378	-0.242461	0.454	0.492	1	E2F1
MA0828.1	0.0018618	-0.242506	0.465	0.487	1	SREBF2(var.2)
MA1466.1	0.759875	-0.248308	0.515	0.482	1	ATF6
MA0071.1	0.0330105	-0.258136	0.519	0.448	1	RORA
MA0844.1	0.000144781	-0.266134	0.432	0.488	0.0916463	XBP1
MA0843.1	0.828045	-0.267082	0.494	0.48	1	TEF
MA0741.1	7.95345e-13	-0.270557	0.382	0.489	5.03453e-10	KLF16
MA0594.2	0.00114074	-0.274863	0.44	0.494	0.722091	HOXA9
MA0649.1	0.172736	-0.276129	0.474	0.469	1	HEY2
MA0799.1	1.03275e-06	-0.283327	0.414	0.506	0.00065373	RFX4
MA0877.2	8.58276e-07	-0.286045	0.415	0.497	0.000543289	BARHL1
MA0846.1	0.833972	-0.288864	0.502	0.482	1	FOXC2
MA0058.3	0.59419	-0.290471	0.486	0.466	1	MAX
MA0822.1	0.555246	-0.298552	0.497	0.477	1	HES7
MA1143.1	2.27014e-05	-0.301983	0.438	0.495	0.01437	FOSL1::JUND(var.2)
MA1122.1	0.000226822	-0.310826	0.438	0.472	0.143578	TFDP1
MA1653.1	4.29776e-08	-0.313567	0.395	0.459	2.72048e-05	ZNF148
MA1126.1	0.723307	-0.321906	0.481	0.458	1	FOS::JUN(var.2)
MA1574.1	1.1461e-05	-0.324001	0.562	0.434	0.00725483	THRB
MA1127.1	1.45398e-05	-0.327016	0.436	0.487	0.00920369	FOSB::JUN
MA1537.1	1.62574e-06	-0.333224	0.57	0.442	0.0010291	NR2F1(var.2)
MA1491.1	0.153788	-0.335584	0.517	0.452	1	GLI3
MA1550.1	2.83036e-05	-0.337023	0.582	0.444	0.0179162	PPARD
MA0060.3	2.45502e-13	-0.343693	0.403	0.529	1.55403e-10	NFYA
MA0625.1	0.185756	-0.345023	0.506	0.447	1	NFATC3
MA1556.1	0.563385	-0.34518	0.495	0.477	1	RXRG(var.2)
MA1525.1	0.861059	-0.348365	0.482	0.458	1	NFATC4
MA1651.1	5.97878e-15	-0.35269	0.403	0.504	3.78457e-12	ZFP42
MA1152.1	0.00575508	-0.35318	0.43	0.475	1	SOX15
MA0755.1	1.94992e-07	-0.35685	0.428	0.499	0.00012343	CUX2
MA0685.1	2.83355e-19	-0.360654	0.368	0.508	1.79363e-16	SP4
MA0777.1	1.54454e-11	-0.374394	0.408	0.502	9.77697e-09	MYBL2
MA0694.1	6.67809e-07	-0.375027	0.414	0.487	0.000422723	ZBTB7B
MA0059.1	0.846208	-0.380887	0.51	0.463	1	MAX::MYC
MA0510.2	3.86427e-08	-0.382912	0.435	0.503	2.44609e-05	RFX5
MA0600.2	2.51547e-06	-0.384694	0.444	0.5	0.00159229	RFX2
MA1110.1	2.88044e-11	-0.384706	0.613	0.439	1.82332e-08	NR1H4
MA1636.1	1.01485e-15	-0.395113	0.669	0.475	6.42399e-13	CEBPG(var.2)
MA1136.1	1.84683e-07	-0.401113	0.414	0.485	0.000116904	FOSB::JUNB(var.2)
MA0638.1	2.65607e-18	-0.432715	0.373	0.503	1.68129e-15	CREB3
MA0488.1	2.44986e-09	-0.443582	0.612	0.437	1.55076e-06	JUN
MA0861.1	8.05133e-125	-0.444142	0.959	0.369	5.0965e-122	TP73
MA1474.1	1.52091e-09	-0.458126	0.404	0.488	9.62734e-07	CREB3L4
MA0014.3	3.6904e-08	-0.458286	0.404	0.48	2.33602e-05	PAX5
MA0616.2	2.46874e-09	-0.463737	0.43	0.479	1.56271e-06	HES2
MA1102.2	1.74143e-18	-0.46768	0.361	0.485	1.10232e-15	CTCFL
MA1564.1	3.71989e-40	-0.467946	0.324	0.517	2.35469e-37	SP9
MA0794.1	3.98573e-11	-0.478528	0.418	0.497	2.52297e-08	PROX1
MA1554.1	5.13774e-17	-0.485653	0.387	0.522	3.25219e-14	RFX7
MA1145.1	1.08452e-06	-0.491024	0.402	0.472	0.000686499	FOSL2::JUND(var.2)
MA1131.1	9.41336e-06	-0.495988	0.427	0.476	0.00595866	FOSL2::JUN(var.2)
MA0149.1	7.51145e-08	-0.511367	0.617	0.414	4.75475e-05	EWSR1-FLI1
MA0864.2	9.85393e-15	-0.514188	0.382	0.512	6.23754e-12	E2F2
MA0137.3	6.21753e-14	-0.530278	0.618	0.436	3.93569e-11	STAT1
MA0609.2	7.43701e-08	-0.534939	0.419	0.477	4.70763e-05	CREM
MA0776.1	7.86485e-17	-0.545568	0.396	0.504	4.97845e-14	MYBL1
MA0131.2	6.56739e-21	-0.555185	0.344	0.5	4.15716e-18	HINFP
MA1140.2	3.08361e-16	-0.555436	0.372	0.493	1.95192e-13	JUNB(var.2)
MA0107.1	8.31787e-83	-0.557359	0.854	0.401	5.26521e-80	RELA
MA0821.1	0.00739541	-0.563094	0.439	0.481	1	HES5
MA0855.1	0.559444	-0.576279	0.499	0.448	1	RXRB
MA0749.1	2.13619e-15	-0.57744	0.376	0.507	1.35221e-12	ZBED1
MA1540.1	1.28803e-10	-0.584112	0.617	0.414	8.15322e-08	NR5A1
MA0834.1	3.76806e-19	-0.607621	0.365	0.496	2.38518e-16	ATF7
MA0112.3	0.108457	-0.610738	0.479	0.462	1	ESR1
MA0856.1	0.634939	-0.610806	0.502	0.447	1	RXRG
MA1535.1	0.00158985	-0.618746	0.564	0.435	1	NR2C1
MA0732.1	2.79868e-30	-0.637115	0.328	0.487	1.77156e-27	EGR3
MA0073.1	1.56059e-29	-0.637995	0.32	0.49	9.8785e-27	RREB1
MA0472.2	1.92577e-25	-0.642948	0.329	0.486	1.21901e-22	EGR2
MA0018.4	0.00345549	-0.652538	0.549	0.423	1	CREB1
MA1129.1	2.08449e-22	-0.65445	0.341	0.502	1.31948e-19	FOSL1::JUN(var.2)
MA0095.2	1.50291e-39	-0.654622	0.324	0.517	9.5134e-37	YY1
MA0605.2	2.61399e-11	-0.665921	0.373	0.485	1.65465e-08	ATF3
MA0162.4	2.33363e-54	-0.667919	0.274	0.495	1.47719e-51	EGR1
MA0695.1	7.68613e-28	-0.67228	0.352	0.505	4.86532e-25	ZBTB7C
MA1596.1	2.13977e-55	-0.672318	0.295	0.514	1.35448e-52	ZNF460
MA0740.1	1.28012e-57	-0.677772	0.296	0.527	8.10315e-55	KLF14
MA0527.1	2.37708e-29	-0.696462	0.324	0.506	1.50469e-26	ZBTB33
MA1139.1	1.97528e-22	-0.705392	0.341	0.492	1.25035e-19	FOSL2::JUNB(var.2)
MA0729.1	0.0917654	-0.713939	0.455	0.467	1	RARA
MA0632.2	1.01351e-34	-0.733717	0.325	0.494	6.41549e-32	TCFL5
MA0656.1	2.48188e-19	-0.749597	0.357	0.488	1.57103e-16	JDP2(var.2)
MA1099.2	5.71115e-36	-0.754709	0.325	0.501	3.61516e-33	HES1
MA0862.1	6.48258e-36	-0.772899	0.317	0.517	4.10347e-33	GMEB2
MA1650.1	2.56648e-59	-0.792942	0.27	0.496	1.62458e-56	ZBTB14
MA0464.2	5.04249e-21	-0.824742	0.365	0.49	3.1919e-18	BHLHE40
MA1133.1	2.53444e-35	-0.845227	0.301	0.497	1.6043e-32	JUN::JUNB(var.2)
MA0115.1	0.0703735	-0.851632	0.503	0.441	1	NR1H2::RXRA
MA0836.2	2.2779e-22	-0.883903	0.73	0.471	1.44191e-19	CEBPD
MA0592.3	0.594037	-0.919213	0.49	0.429	1	ESRRA
MA1587.1	1.66272e-26	-0.922636	0.316	0.501	1.0525e-23	ZNF135
MA1632.1	0.000298728	-0.95472	0.58	0.423	0.189095	ATF2
MA0664.1	5.58601e-38	-0.988693	0.289	0.487	3.53594e-35	MLXIPL
MA0663.1	1.73962e-30	-0.994391	0.327	0.486	1.10118e-27	MLX
MA0102.4	8.07508e-15	-1.00989	0.684	0.478	5.11153e-12	CEBPA
MA0773.1	1.1547e-36	-1.02543	0.295	0.484	7.30924e-34	MEF2D
MA1464.1	5.45691e-31	-1.0267	0.327	0.474	3.45422e-28	ARNT2
MA1513.1	2.38818e-124	-1.05281	0.154	0.531	1.51172e-121	KLF15
MA1647.1	0.125675	-1.05653	0.456	0.426	1	PRDM4
MA0466.2	0.00496462	-1.10655	0.558	0.466	1	CEBPB
MA0660.1	3.01564e-35	-1.11083	0.3	0.49	1.9089e-32	MEF2B
MA0052.4	1.13223e-73	-1.13661	0.237	0.503	7.16701e-71	MEF2A
MA1536.1	0.0252374	-1.15201	0.535	0.43	1	NR2C2(var.2)
MA1475.1	2.21856e-61	-1.15771	0.257	0.504	1.40435e-58	CREB3L4(var.2)
MA0497.1	6.65301e-65	-1.16662	0.269	0.486	4.21136e-62	MEF2C
MA0141.3	0.571918	-1.18189	0.461	0.427	1	ESRRB
MA0636.1	5.24342e-42	-1.2094	0.293	0.489	3.31909e-39	BHLHE41
MA0871.2	3.13435e-35	-1.28557	0.317	0.467	1.98404e-32	TFEC
MA0506.1	5.31952e-94	-1.377	0.186	0.508	3.36726e-91	NRF1
MA1545.1	5.25804e-77	-1.43855	0.218	0.524	3.32834e-74	OVOL2
MA1125.1	7.94147e-187	-1.54323	0.123	0.539	5.02695e-184	ZNF384
MA0837.1	0.752628	-1.55901	0.467	0.466	1	CEBPE
MA1420.1	7.7665e-80	-1.58736	0.233	0.515	4.9162e-77	IRF5
MA0093.3	0.146848	-1.59122	0.523	0.406	1	USF1
MA1544.1	9.80803e-88	-1.61417	0.202	0.524	6.20848e-85	OVOL1
MA0748.2	3.38409e-94	-1.65503	0.19	0.527	2.14213e-91	YY2
MA0686.1	3.63641e-91	-1.69216	0.182	0.534	2.30184e-88	SPDEF
MA0692.1	7.2376e-26	-1.70767	0.305	0.444	4.5814e-23	TFEB
MA0017.2	1.2068e-19	-1.79257	0.315	0.446	7.63904e-17	NR2F1
MA0838.1	0.140591	-1.79558	0.458	0.464	1	CEBPG
MA0160.1	2.99728e-05	-1.81973	0.406	0.422	0.0189728	NR4A2
MA0620.3	2.75812e-27	-1.91015	0.313	0.444	1.74589e-24	MITF
MA0684.2	3.33732e-102	-2.00464	0.162	0.52	2.11252e-99	RUNX3
MA1652.1	2.25701e-05	-2.03133	0.388	0.372	0.0142869	ZKSCAN5
MA0526.3	0.488077	-2.1327	0.489	0.403	1	USF2
MA0831.2	8.98375e-38	-2.1645	0.284	0.447	5.68672e-35	TFE3
MA0772.1	1.02992e-139	-2.24554	0.139	0.509	6.51937e-137	IRF7
MA0511.2	5.73205e-122	-2.26751	0.141	0.527	3.62839e-119	RUNX2
MA0051.1	5.2272e-116	-2.4642	0.159	0.491	3.30881e-113	IRF2
MA0028.2	1.88414e-161	-2.58393	0.1	0.54	1.19266e-158	ELK1
MA0759.1	2.66577e-149	-2.63356	0.102	0.537	1.68743e-146	ELK3
MA1112.2	1.05422e-59	-2.78088	0.194	0.46	6.67319e-57	NR4A1
MA0763.1	1.24555e-168	-2.95976	0.072	0.555	7.88435e-166	ETV3
MA1111.1	3.12024e-24	-2.98256	0.284	0.417	1.97511e-21	NR2F2
MA1483.1	7.25791e-178	-3.05767	0.064	0.557	4.59426e-175	ELF2
MA0750.2	7.30907e-199	-3.15084	0.037	0.567	4.62664e-196	ZBTB7A
MA1419.1	7.1063e-197	-3.25226	0.098	0.528	4.49829e-194	IRF4
MA0652.1	2.69493e-170	-3.30825	0.103	0.507	1.70589e-167	IRF8
MA0156.2	4.15373e-183	-3.39563	0.05	0.56	2.62931e-180	FEV
MA0050.2	1.62248e-236	-3.4805	0.041	0.455	1.02703e-233	IRF1
MA1484.1	2.82743e-182	-3.61354	0.052	0.559	1.78976e-179	ETS2
MA0475.2	3.9751e-196	-3.61855	0.058	0.574	2.51624e-193	FLI1
MA0653.1	1.577e-217	-3.6349	0.066	0.527	9.98244e-215	IRF9
MA0641.1	1.00832e-179	-3.63812	0.052	0.551	6.38269e-177	ELF4
MA0098.3	4.55505e-194	-3.67642	0.048	0.562	2.88335e-191	ETS1
MA1418.1	1.21602e-128	-3.69415	0.112	0.456	7.6974e-126	IRF3
MA0474.2	1.1913e-184	-3.85518	0.044	0.573	7.54092e-182	ERG
MA0076.2	2.84425e-220	-3.9552	0.024	0.582	1.80041e-217	ELK4
MA0765.2	1.86389e-210	-4.09945	0.028	0.568	1.17985e-207	ETV5
MA0762.1	8.23702e-186	-4.12371	0.031	0.563	5.21403e-183	ETV2
MA0760.1	8.56747e-195	-4.18296	0.036	0.572	5.42321e-192	ERF
MA0517.1	1.14218e-165	-4.36202	0.076	0.422	7.23e-163	STAT1::STAT2
MA0764.2	1.25067e-105	-5.38391	0.074	0.412	7.91672e-103	ETV4
MA0761.2	3.38216e-145	-6.1368	0.036	0.483	2.14091e-142	ETV1
MA0473.3	3.30429e-150	-6.92276	0.027	0.456	2.09161e-147	ELF1
MA0062.3	2.30314e-156	-7.08437	0.032	0.473	1.45789e-153	GABPA
MA0136.2	1.29114e-165	-7.17587	0.027	0.469	8.17293e-163	ELF5
MA1508.1	3.71332e-127	-7.46455	0.047	0.368	2.35053e-124	IKZF1
MA0645.1	1.65448e-208	-7.49931	0.015	0.526	1.04729e-205	ETV6
MA0640.2	1.47377e-137	-9.29349	0.033	0.4	9.32897e-135	ELF3
MA0080.5	4.58206e-130	-10.6784	0.032	0.288	2.90044e-127	SPI1
MA0598.3	4.72478e-160	-12.3017	0.023	0.406	2.99079e-157	EHF
MA0687.1	1.79794e-119	-12.6892	0.025	0.292	1.13809e-116	SPIC
MA0081.2	1.64176e-134	-13.0981	0.021	0.296	1.03923e-131	SPIB

## Sheet: Spinous2
	p_val	avg_log2FC	pct.1	pct.2	p_val_adj	gene
MA0647.1	8.16415e-72	2.73346	0.985	0.475	5.16791e-69	GRHL1
MA1105.2	9.00401e-65	2.99955	0.978	0.473	5.69954e-62	GRHL2
MA0145.3	6.09166e-54	2.4516	0.926	0.48	3.85602e-51	TFCP2
MA0525.2	1.65357e-41	1.90176	0.963	0.442	1.04671e-38	TP63
MA1511.1	1.25235e-37	1.33536	0.882	0.484	7.92735e-35	KLF10
MA0868.2	1.66332e-36	1.79188	0.89	0.475	1.05288e-33	SOX8
MA0161.2	3.20465e-36	1.60596	0.963	0.498	2.02855e-33	NFIC
MA0106.3	2.94877e-35	1.17356	0.971	0.446	1.86657e-32	TP53
MA0671.1	8.26389e-35	1.58448	0.949	0.496	5.23105e-32	NFIX
MA0077.1	2.6678e-33	1.6276	0.912	0.482	1.68872e-30	SOX9
MA0861.1	7.56885e-33	1.11554	0.956	0.441	4.79108e-30	TP73
MA0670.1	9.77014e-33	1.31964	0.941	0.494	6.1845e-30	NFIA
MA0599.1	3.87914e-31	0.96285	0.838	0.479	2.4555e-28	KLF5
MA1487.1	1.0598e-30	2.29144	0.89	0.488	6.70851e-28	FOXE1
MA0039.4	1.27951e-30	0.931673	0.86	0.487	8.09932e-28	KLF4
MA0746.2	1.78297e-29	0.96801	0.846	0.473	1.12862e-26	SP3
MA1116.1	6.96684e-29	1.30786	0.941	0.529	4.41001e-26	RBPJ
MA0867.2	1.37976e-28	1.69903	0.86	0.484	8.73386e-26	SOX4
MA1562.1	9.4605e-28	1.37533	0.838	0.484	5.9885e-25	SOX14
MA1563.1	2.34336e-27	1.6505	0.853	0.489	1.48335e-24	SOX18
MA1107.2	3.88012e-27	1.0105	0.86	0.482	2.45612e-24	KLF9
MA0706.1	9.12182e-27	1.48695	0.868	0.489	5.77411e-24	MEOX2
MA0442.2	1.02905e-26	1.28426	0.868	0.463	6.51389e-24	SOX10
MA0836.2	1.23152e-26	1.27782	0.89	0.499	7.79555e-24	CEBPD
MA0847.2	1.53987e-26	1.92467	0.846	0.474	9.74739e-24	FOXD2
MA0903.1	1.36403e-25	1.46588	0.838	0.484	8.63434e-23	HOXB3
MA1155.1	1.70311e-25	1.28634	0.868	0.497	1.07807e-22	ZSCAN4
MA0761.2	3.4766e-25	-5.99055	0.037	0.429	2.20069e-22	ETV1
MA0593.1	3.81323e-25	1.70687	0.831	0.474	2.41378e-22	FOXP2
MA0043.3	1.17503e-24	1.393	0.868	0.483	7.43795e-22	HLF
MA0744.2	8.40119e-24	1.16756	0.86	0.484	5.31795e-21	SCRT2
MA0852.2	8.80837e-24	2.07757	0.794	0.482	5.5757e-21	FOXK1
MA1152.1	1.57936e-23	1.2765	0.838	0.459	9.99736e-21	SOX15
MA0683.1	2.08367e-23	1.19774	0.875	0.484	1.31896e-20	POU4F2
MA0702.2	2.14621e-23	2.22476	0.816	0.471	1.35855e-20	LMX1A
MA0713.1	2.95009e-23	1.26728	0.831	0.482	1.86741e-20	PHOX2A
MA0062.3	3.78839e-23	-6.90758	0.044	0.419	2.39805e-20	GABPA
MA0674.1	5.79134e-23	1.48299	0.816	0.485	3.66592e-20	NKX6-1
MA0743.2	2.59153e-22	1.24822	0.882	0.492	1.64044e-19	SCRT1
MA1519.1	2.6677e-22	1.47994	0.824	0.482	1.68866e-19	LHX5
MA1118.1	5.56229e-22	1.2127	0.868	0.484	3.52093e-19	SIX1
MA0042.2	5.70337e-22	1.78263	0.816	0.48	3.61023e-19	FOXI1
MA0033.2	5.70337e-22	1.78263	0.816	0.48	3.61023e-19	FOXL1
MA0848.1	5.70337e-22	1.78263	0.816	0.48	3.61023e-19	FOXO4
MA0849.1	5.70337e-22	1.78263	0.816	0.48	3.61023e-19	FOXO6
MA0850.1	5.70337e-22	1.78263	0.816	0.48	3.61023e-19	FOXP3
MA0474.2	5.8337e-22	-3.46608	0.066	0.508	3.69273e-19	ERG
MA0710.1	9.67003e-22	1.66127	0.772	0.484	6.12113e-19	NOTO
MA0645.1	1.70332e-21	-6.9638	0.022	0.464	1.0782e-18	ETV6
MA0025.2	1.76284e-21	1.41858	0.816	0.477	1.11588e-18	NFIL3
MA0792.1	1.92086e-21	1.11978	0.824	0.473	1.2159e-18	POU5F1B
MA0892.1	2.29784e-21	1.31446	0.779	0.487	1.45453e-18	GSX1
MA0598.3	2.38036e-21	-11.9645	0.029	0.359	1.50677e-18	EHF
MA0143.4	2.69836e-21	1.07853	0.846	0.473	1.70806e-18	SOX2
MA0718.1	4.91428e-21	1.44727	0.838	0.488	3.11074e-18	RAX
MA1103.2	5.46839e-21	1.51265	0.794	0.48	3.46149e-18	FOXK2
MA0475.2	5.96907e-21	-3.12429	0.074	0.51	3.77842e-18	FLI1
MA0658.1	8.20079e-21	1.66172	0.787	0.49	5.1911e-18	LHX6
MA0760.1	1.06113e-20	-3.36104	0.051	0.506	6.71694e-18	ERF
MA0703.2	1.29701e-20	1.40972	0.801	0.474	8.21009e-18	LMX1B
MA0068.2	1.84704e-20	1.43935	0.794	0.488	1.16917e-17	PAX4
MA0473.3	1.89323e-20	-6.55681	0.044	0.403	1.19841e-17	ELF1
MA1640.1	3.62181e-20	1.08336	0.868	0.487	2.29261e-17	MEIS2(var.2)
MA0786.1	4.79081e-20	0.967329	0.816	0.483	3.03258e-17	POU3F1
MA1512.1	7.02302e-20	0.788965	0.838	0.481	4.44557e-17	KLF11
MA0017.2	7.08812e-20	-2.3359	0.191	0.433	4.48678e-17	NR2F1
MA0098.3	7.18724e-20	-3.05216	0.103	0.498	4.54952e-17	ETS1
MA0079.4	7.71181e-20	0.790254	0.787	0.483	4.88157e-17	SP1
MA0152.1	9.52581e-20	0.946193	0.875	0.474	6.02984e-17	NFATC2
MA1587.1	1.07039e-19	-1.34649	0.206	0.481	6.7756e-17	ZNF135
MA0660.1	1.44252e-19	-1.58609	0.191	0.47	9.13116e-17	MEF2B
MA1520.1	1.47288e-19	1.27617	0.824	0.495	9.32333e-17	MAF
MA0784.1	1.65737e-19	1.19698	0.816	0.483	1.04911e-16	POU1F1
MA1528.1	1.67823e-19	1.11982	0.919	0.502	1.06232e-16	NFIX(var.2)
MA1530.1	2.59889e-19	1.2497	0.831	0.49	1.6451e-16	NKX6-3
MA0762.1	2.70494e-19	-3.29824	0.074	0.497	1.71223e-16	ETV2
MA0787.1	2.75025e-19	1.05129	0.772	0.476	1.74091e-16	POU3F2
MA1463.1	2.84022e-19	1.55497	0.794	0.482	1.79786e-16	ARGFX
MA0466.2	4.43242e-19	0.906967	0.86	0.469	2.80572e-16	CEBPB
MA0765.2	4.78554e-19	-3.34013	0.081	0.5	3.02925e-16	ETV5
MA0030.1	7.57836e-19	1.80788	0.787	0.487	4.7971e-16	FOXF2
MA0102.4	8.67828e-19	0.899216	0.875	0.498	5.49335e-16	CEBPA
MA1120.1	1.19095e-18	0.89749	0.86	0.488	7.53868e-16	SOX13
MA0084.1	1.36247e-18	1.31572	0.779	0.481	8.62446e-16	SRY
MA1500.1	1.59248e-18	1.415	0.743	0.487	1.00804e-15	HOXB6
MA0481.3	2.1985e-18	1.85441	0.801	0.485	1.39165e-15	FOXP1
MA1508.1	2.57454e-18	-7.20766	0.044	0.329	1.62969e-15	IKZF1
MA0675.1	2.72497e-18	1.55645	0.809	0.474	1.7249e-15	NKX6-2
MA0785.1	2.96646e-18	1.068	0.743	0.481	1.87777e-15	POU2F1
MA1484.1	3.04365e-18	-2.90792	0.11	0.496	1.92663e-15	ETS2
MA0613.1	4.27264e-18	1.44616	0.816	0.48	2.70458e-15	FOXG1
MA1124.1	4.28805e-18	0.969992	0.897	0.494	2.71433e-15	ZNF24
MA0031.1	5.29722e-18	1.83628	0.794	0.48	3.35314e-15	FOXD1
MA0157.2	5.29722e-18	1.83628	0.794	0.48	3.35314e-15	FOXO3
MA1577.1	6.08355e-18	1.33318	0.816	0.485	3.85089e-15	TLX2
MA0148.4	7.94506e-18	2.16266	0.757	0.485	5.02922e-15	FOXA1
MA0640.2	1.0102e-17	-8.97995	0.037	0.355	6.39458e-15	ELF3
MA0893.2	1.06985e-17	1.38692	0.757	0.488	6.77212e-15	GSX2
MA0790.1	1.51204e-17	0.908596	0.772	0.491	9.5712e-15	POU4F1
MA1121.1	1.84599e-17	0.272614	0.926	0.501	1.16851e-14	TEAD2
MA1683.1	2.01933e-17	1.72952	0.816	0.483	1.27823e-14	FOXA3
MA0661.1	2.54203e-17	1.15359	0.801	0.493	1.6091e-14	MEOX1
MA0523.1	2.54945e-17	1.08283	0.757	0.484	1.6138e-14	TCF7L2
MA0465.2	2.86209e-17	1.00373	0.779	0.477	1.8117e-14	CDX2
MA0732.1	3.7471e-17	1.02223	0.743	0.456	2.37192e-14	EGR3
MA1113.2	4.078e-17	0.920009	0.831	0.479	2.58137e-14	PBX2
MA0866.1	6.08552e-17	1.17172	0.772	0.494	3.85213e-14	SOX21
MA1497.1	6.16831e-17	1.29645	0.787	0.484	3.90454e-14	HOXA6
MA0132.2	7.1738e-17	1.51114	0.772	0.484	4.54102e-14	PDX1
MA1481.1	7.1738e-17	1.51114	0.772	0.484	4.54102e-14	DRGX
MA0641.1	7.59985e-17	-2.8547	0.096	0.489	4.8107e-14	ELF4
MA0725.1	8.65457e-17	1.26543	0.838	0.489	5.47834e-14	VSX1
MA0653.1	8.85901e-17	-2.84689	0.147	0.469	5.60775e-14	IRF9
MA0162.4	8.99205e-17	0.899319	0.735	0.456	5.69197e-14	EGR1
MA1521.1	1.30725e-16	1.4176	0.787	0.496	8.27488e-14	MAFA
MA0878.2	1.35212e-16	0.935568	0.809	0.489	8.5589e-14	CDX1
MA0913.2	1.378e-16	1.10995	0.779	0.49	8.72272e-14	HOXD9
MA0788.1	1.39694e-16	1.10597	0.772	0.482	8.84266e-14	POU3F3
MA0680.1	1.58248e-16	1.34701	0.765	0.48	1.00171e-13	PAX7
MA0075.3	1.59098e-16	1.06726	0.816	0.484	1.00709e-13	PRRX2
MA1517.1	2.19409e-16	0.69649	0.831	0.48	1.38886e-13	KLF6
MA0846.1	2.3219e-16	1.48827	0.794	0.477	1.46976e-13	FOXC2
MA0136.2	2.53639e-16	-6.42932	0.066	0.414	1.60553e-13	ELF5
MA1639.1	3.0855e-16	0.952819	0.824	0.485	1.95312e-13	MEIS1(var.2)
MA0156.2	3.53087e-16	-2.63159	0.147	0.495	2.23504e-13	FEV
MA0791.1	4.37581e-16	0.976819	0.779	0.48	2.76989e-13	POU4F3
MA0047.3	5.52547e-16	1.66414	0.772	0.488	3.49762e-13	FOXA2
MA0793.1	7.2974e-16	1.4226	0.743	0.494	4.61926e-13	POU6F2
MA0076.2	8.42104e-16	-2.78584	0.088	0.512	5.33052e-13	ELK4
MA0808.1	8.82127e-16	-0.0324824	0.956	0.497	5.58386e-13	TEAD3
MA0081.2	9.39529e-16	-12.7926	0.022	0.262	5.94722e-13	SPIB
MA0654.1	1.00861e-15	1.30192	0.779	0.487	6.38452e-13	ISX
MA0701.2	1.00861e-15	1.30192	0.779	0.487	6.38452e-13	LHX9
MA0103.3	1.08743e-15	0.690646	0.904	0.498	6.88344e-13	ZEB1
MA0032.2	1.14185e-15	1.5042	0.75	0.487	7.22788e-13	FOXC1
MA0889.1	1.17993e-15	1.0668	0.831	0.486	7.46899e-13	GBX1
MA1476.1	1.40905e-15	1.16945	0.794	0.488	8.91927e-13	DLX5
MA0733.1	1.46265e-15	1.05848	0.728	0.45	9.25861e-13	EGR4
MA0628.1	1.59906e-15	1.11713	0.794	0.487	1.01221e-12	POU6F1
MA0809.2	1.86675e-15	-0.00837332	0.89	0.5	1.18165e-12	TEAD4
MA0652.1	2.95545e-15	-2.78858	0.14	0.457	1.8708e-12	IRF8
MA0707.1	5.925e-15	1.17643	0.809	0.482	3.75052e-12	MNX1
MA1643.1	5.96734e-15	0.359857	0.912	0.512	3.77733e-12	NFIB
MA0716.1	6.89968e-15	1.3858	0.75	0.483	4.3675e-12	PRRX1
MA0721.1	6.89968e-15	1.3858	0.75	0.483	4.3675e-12	UNCX
MA0894.1	7.76348e-15	1.23617	0.757	0.481	4.91428e-12	HESX1
MA0090.3	1.02197e-14	-0.0217456	0.912	0.503	6.46904e-12	TEAD1
MA1473.1	1.20333e-14	0.936783	0.794	0.486	7.61708e-12	CDX4
MA0773.1	1.43471e-14	-1.4118	0.206	0.463	9.08171e-12	MEF2D
MA1506.1	1.49084e-14	1.00513	0.765	0.474	9.43701e-12	HOXD10
MA1527.1	1.93728e-14	0.917036	0.89	0.515	1.2263e-11	NFIC(var.2)
MA0741.1	1.99474e-14	0.630126	0.772	0.466	1.26267e-11	KLF16
MA0657.1	2.41613e-14	0.93173	0.779	0.49	1.52941e-11	KLF13
MA1117.1	2.72406e-14	0.992237	0.846	0.491	1.72433e-11	RELB
MA0050.2	2.75196e-14	-2.76665	0.118	0.403	1.74199e-11	IRF1
MA1489.1	2.85717e-14	1.49152	0.728	0.478	1.80859e-11	FOXN3
MA1419.1	3.1284e-14	-2.39079	0.213	0.472	1.98028e-11	IRF4
MA1504.1	3.23504e-14	0.925945	0.75	0.49	2.04778e-11	HOXC4
MA1654.1	4.07658e-14	0.658317	0.853	0.508	2.58048e-11	ZNF16
MA0763.1	5.06076e-14	-2.33275	0.154	0.494	3.20346e-11	ETV3
MA1648.1	5.19233e-14	0.736666	0.794	0.513	3.28675e-11	TCF12(var.2)
MA0052.4	5.64402e-14	-1.10258	0.199	0.471	3.57267e-11	MEF2A
MA0501.1	5.85852e-14	1.06078	0.816	0.515	3.70844e-11	MAF::NFE2
MA0750.2	6.92748e-14	-2.15827	0.118	0.5	4.38509e-11	ZBTB7A
MA1509.1	7.14705e-14	1.14237	0.75	0.484	4.52408e-11	IRF6
MA1564.1	7.19451e-14	0.629291	0.743	0.482	4.55412e-11	SP9
MA1529.1	7.57161e-14	1.08511	0.809	0.496	4.79283e-11	NHLH2
MA1495.1	9.73205e-14	1.00066	0.757	0.49	6.16039e-11	HOXA1
MA0900.2	9.73205e-14	1.00066	0.757	0.49	6.16039e-11	HOXA2
MA1561.1	1.05515e-13	0.889654	0.75	0.474	6.6791e-11	SOX12
MA0651.1	1.06721e-13	1.02309	0.757	0.484	6.75541e-11	HOXC11
MA0479.1	1.07033e-13	0.856212	0.794	0.481	6.77518e-11	FOXH1
MA0662.1	1.08159e-13	1.22228	0.779	0.481	6.84645e-11	MIXL1
MA1633.1	1.26672e-13	-2.12589	0.875	0.5	8.01836e-11	BACH1
MA0471.2	1.30759e-13	0.751568	0.757	0.445	8.27704e-11	E2F6
MA0764.2	1.44421e-13	-4.95894	0.125	0.369	9.14186e-11	ETV4
MA0789.1	1.71123e-13	0.937962	0.75	0.486	1.08321e-10	POU3F4
MA0650.2	1.79198e-13	0.989356	0.794	0.488	1.13432e-10	HOXA13
MA0644.1	1.88336e-13	0.910995	0.765	0.48	1.19217e-10	ESX1
MA0639.1	1.9444e-13	0.991325	0.706	0.471	1.23081e-10	DBP
MA0685.1	2.66355e-13	0.652701	0.713	0.481	1.68603e-10	SP4
MA1650.1	2.78626e-13	1.00714	0.669	0.458	1.7637e-10	ZBTB14
MA0890.1	3.11619e-13	0.787159	0.779	0.486	1.97255e-10	GBX2
MA0768.1	3.34129e-13	0.972208	0.728	0.476	2.11504e-10	LEF1
MA0886.1	3.93228e-13	1.02342	0.728	0.493	2.48913e-10	EMX2
MA0830.2	4.73018e-13	0.652547	0.809	0.513	2.9942e-10	TCF4
MA1505.1	7.60199e-13	1.00631	0.706	0.481	4.81206e-10	HOXC8
MA1601.1	8.94434e-13	0.702399	0.816	0.494	5.66177e-10	ZNF75D
MA0899.1	1.07544e-12	0.868517	0.794	0.489	6.80755e-10	HOXA10
MA1631.1	1.14549e-12	0.695294	0.824	0.507	7.25097e-10	ASCL1(var.2)
MA0772.1	2.0254e-12	-1.71667	0.235	0.462	1.28208e-09	IRF7
MA1125.1	2.21829e-12	-0.944394	0.228	0.486	1.40418e-09	ZNF384
MA0089.2	2.26787e-12	0.312046	0.831	0.516	1.43556e-09	NFE2L1
MA0912.2	2.38494e-12	1.02396	0.765	0.494	1.50967e-09	HOXD3
MA1569.1	2.68943e-12	0.756431	0.816	0.498	1.70241e-09	TFAP2E
MA0080.5	2.73332e-12	-10.2688	0.051	0.256	1.73019e-09	SPI1
MA0027.2	3.02842e-12	0.963064	0.721	0.482	1.91699e-09	EN1
MA0679.2	3.49058e-12	0.89895	0.706	0.481	2.20954e-09	ONECUT1
MA0618.1	4.55517e-12	1.15851	0.728	0.479	2.88342e-09	LBX1
MA0811.1	5.84727e-12	0.371545	0.86	0.487	3.70132e-09	TFAP2B
MA1119.1	6.01895e-12	0.699321	0.794	0.488	3.80999e-09	SIX2
MA0687.1	6.24593e-12	-12.2955	0.059	0.258	3.95367e-09	SPIC
MA0490.2	6.42644e-12	-0.69797	0.846	0.47	4.06793e-09	JUNB
MA0522.3	7.02518e-12	0.628594	0.765	0.516	4.44694e-09	TCF3
MA1483.1	7.49562e-12	-2.35201	0.14	0.495	4.74473e-09	ELF2
MA0700.2	8.32232e-12	0.963773	0.75	0.481	5.26803e-09	LHX2
MA0902.2	9.19023e-12	0.880489	0.706	0.483	5.81742e-09	HOXB2
MA0697.1	9.48962e-12	0.752541	0.787	0.473	6.00693e-09	ZIC3
MA0810.1	1.10641e-11	0.371799	0.846	0.496	7.00359e-09	TFAP2A(var.2)
MA0722.1	1.13578e-11	1.05808	0.772	0.491	7.18947e-09	VAX1
MA0723.1	1.13578e-11	1.05808	0.772	0.491	7.18947e-09	VAX2
MA0612.2	1.26815e-11	0.974623	0.721	0.485	8.02736e-09	EMX1
MA0524.2	1.31908e-11	0.309265	0.853	0.484	8.34976e-09	TFAP2C
MA0769.2	1.37279e-11	0.828871	0.699	0.481	8.68978e-09	TCF7
MA0835.2	1.42751e-11	-1.33511	0.838	0.477	9.03614e-09	BATF3
MA1499.1	1.47772e-11	0.829041	0.757	0.487	9.35395e-09	HOXB4
MA1507.1	1.47772e-11	0.829041	0.757	0.487	9.35395e-09	HOXD4
MA0516.2	1.64287e-11	0.6261	0.743	0.477	1.03994e-08	SP2
MA1634.1	1.80964e-11	-1.71787	0.846	0.477	1.14551e-08	BATF
MA0462.2	1.9433e-11	-1.5406	0.846	0.476	1.23011e-08	BATF::JUN
MA1656.1	2.2703e-11	0.629029	0.809	0.506	1.4371e-08	ZNF449
MA0747.1	2.75981e-11	0.545384	0.772	0.477	1.74696e-08	SP8
MA0491.2	2.97079e-11	-0.703884	0.846	0.472	1.88051e-08	JUND
MA0646.1	3.83244e-11	0.989875	0.772	0.486	2.42593e-08	GCM1
MA0905.1	3.95858e-11	0.877666	0.721	0.484	2.50578e-08	HOXC10
MA0630.1	3.98952e-11	1.34361	0.757	0.483	2.52537e-08	SHOX
MA0717.1	3.98952e-11	1.34361	0.757	0.483	2.52537e-08	RAX2
MA0627.2	4.42858e-11	0.910073	0.699	0.478	2.80329e-08	POU2F3
MA1501.1	4.89464e-11	0.976968	0.706	0.487	3.09831e-08	HOXB7
MA0843.1	5.24885e-11	0.709209	0.779	0.474	3.32252e-08	TEF
MA0476.1	5.74915e-11	-1.77724	0.831	0.476	3.63921e-08	FOS
MA1516.1	5.78047e-11	0.516025	0.779	0.478	3.65904e-08	KLF3
MA0901.2	6.63731e-11	0.710339	0.735	0.481	4.20142e-08	HOXB13
MA1128.1	7.88559e-11	-1.49805	0.868	0.472	4.99158e-08	FOSL1::JUN
MA0497.1	7.97866e-11	-1.09599	0.243	0.46	5.05049e-08	MEF2C
MA1596.1	9.75874e-11	-0.677406	0.25	0.489	6.17728e-08	ZNF460
MA0759.1	9.84354e-11	-1.74954	0.199	0.481	6.23096e-08	ELK3
MA1130.1	1.04759e-10	-1.39158	0.868	0.47	6.63125e-08	FOSL2::JUN
MA1138.1	1.05534e-10	-1.43288	0.838	0.471	6.68031e-08	FOSL2::JUNB
MA1137.1	1.13809e-10	-1.45844	0.838	0.472	7.20409e-08	FOSL1::JUNB
MA0485.2	1.37011e-10	0.884	0.713	0.486	8.67279e-08	HOXC9
MA0477.2	1.37239e-10	-0.80683	0.846	0.472	8.68722e-08	FOSL1
MA0517.1	1.51143e-10	-3.69459	0.14	0.378	9.56735e-08	STAT1::STAT2
MA0144.2	1.64402e-10	0.518422	0.816	0.488	1.04066e-07	STAT3
MA1142.1	1.88697e-10	-1.05556	0.853	0.472	1.19445e-07	FOSL1::JUND
MA0028.2	1.96559e-10	-1.6484	0.184	0.484	1.24422e-07	ELK1
MA1141.1	2.00763e-10	-1.73003	0.86	0.476	1.27083e-07	FOS::JUND
MA1135.1	2.13305e-10	-1.8419	0.846	0.471	1.35022e-07	FOSB::JUNB
MA0489.1	2.13331e-10	-2.55528	0.853	0.473	1.35039e-07	JUN(var.2)
MA1134.1	2.38029e-10	-1.30951	0.868	0.471	1.50673e-07	FOS::JUNB
MA1144.1	2.42311e-10	-1.44612	0.838	0.469	1.53383e-07	FOSL2::JUND
MA0099.3	2.4715e-10	-1.46693	0.846	0.473	1.56446e-07	FOS::JUN
MA0812.1	3.1087e-10	0.435107	0.846	0.499	1.96781e-07	TFAP2B(var.2)
MA0153.2	3.38796e-10	0.757035	0.699	0.493	2.14458e-07	HNF1B
MA0820.1	3.6606e-10	0.521038	0.743	0.499	2.31716e-07	FIGLA
MA0689.1	3.91971e-10	0.670682	0.743	0.496	2.48118e-07	TBX20
MA1515.1	3.97006e-10	0.492855	0.735	0.481	2.51305e-07	KLF2
MA0804.1	4.02435e-10	0.691381	0.706	0.484	2.54741e-07	TBX19
MA0780.1	4.49175e-10	0.854829	0.706	0.481	2.84328e-07	PAX3
MA0837.1	5.06721e-10	0.156471	0.765	0.458	3.20755e-07	CEBPE
MA1132.1	5.84673e-10	-0.957583	0.846	0.471	3.70098e-07	JUN::JUNB
MA0873.1	5.89787e-10	0.744863	0.721	0.483	3.73335e-07	HOXD12
MA0158.2	7.40621e-10	0.957878	0.743	0.486	4.68813e-07	HOXA5
MA0472.2	7.47021e-10	0.926013	0.647	0.458	4.72864e-07	EGR2
MA1557.1	8.1755e-10	0.620619	0.713	0.487	5.17509e-07	SMAD5
MA0498.2	8.34134e-10	0.837495	0.684	0.482	5.28007e-07	MEIS1
MA0726.1	9.0584e-10	0.708815	0.757	0.49	5.73397e-07	VSX2
MA0715.1	9.19921e-10	0.77592	0.713	0.479	5.8231e-07	PROP1
MA1522.1	9.48106e-10	0.501591	0.787	0.46	6.00151e-07	MAZ
MA0815.1	1.05123e-09	0.514714	0.824	0.499	6.65429e-07	TFAP2C(var.3)
MA1122.1	1.09623e-09	1.0226	0.676	0.461	6.93915e-07	TFDP1
MA1513.1	1.29736e-09	0.602285	0.676	0.47	8.21231e-07	KLF15
MA0634.1	1.30178e-09	1.01007	0.735	0.477	8.24028e-07	ALX3
MA1599.1	1.43196e-09	0.630018	0.721	0.498	9.06429e-07	ZNF682
MA0887.1	1.52111e-09	0.747965	0.743	0.484	9.62861e-07	EVX1
MA0906.1	1.97584e-09	0.7082	0.713	0.481	1.2507e-06	HOXC12
MA0655.1	2.0208e-09	-0.789623	0.846	0.469	1.27916e-06	JDP2
MA0813.1	2.05074e-09	0.584978	0.809	0.5	1.29812e-06	TFAP2B(var.3)
MA1549.1	2.36813e-09	0.796691	0.721	0.49	1.49902e-06	POU6F1(var.2)
MA0841.1	2.62209e-09	-1.18914	0.824	0.48	1.65979e-06	NFE2
MA0478.1	2.62774e-09	-2.20831	0.831	0.475	1.66336e-06	FOSL2
MA1101.2	2.99906e-09	-1.4367	0.846	0.475	1.8984e-06	BACH2
MA1115.1	3.11302e-09	0.791155	0.721	0.474	1.97054e-06	POU5F1
MA1503.1	3.57055e-09	0.731145	0.699	0.488	2.26016e-06	HOXB9
MA0888.1	3.8953e-09	0.648401	0.691	0.491	2.46572e-06	EVX2
MA0699.1	4.3323e-09	0.892755	0.735	0.48	2.74234e-06	LBX2
MA0884.1	5.30469e-09	0.865718	0.721	0.489	3.35787e-06	DUXA
MA0119.1	5.95721e-09	0.370182	0.816	0.514	3.77091e-06	NFIC::TLX1
MA0891.1	6.12883e-09	0.698222	0.765	0.49	3.87955e-06	GSC2
MA1418.1	6.57505e-09	-3.02653	0.25	0.41	4.16201e-06	IRF3
MA0597.1	6.86783e-09	0.328945	0.809	0.496	4.34733e-06	THAP1
MA0909.2	7.41458e-09	0.631866	0.721	0.482	4.69343e-06	HOXD13
MA1579.1	8.16566e-09	0.461351	0.809	0.508	5.16886e-06	ZBTB26
MA0875.1	8.19648e-09	0.862981	0.713	0.482	5.18837e-06	BARX1
MA1478.1	8.43315e-09	0.749655	0.691	0.476	5.33818e-06	DMRTA2
MA0468.1	8.47734e-09	0.616738	0.728	0.485	5.36615e-06	DUX4
MA0642.1	8.62758e-09	0.765207	0.669	0.489	5.46126e-06	EN2
MA0904.2	1.02749e-08	0.855977	0.713	0.493	6.504e-06	HOXB5
MA0833.2	1.04421e-08	0.476822	0.772	0.475	6.60987e-06	ATF4
MA0688.1	1.453e-08	0.526813	0.721	0.492	9.19746e-06	TBX2
MA0907.1	1.56588e-08	0.659626	0.699	0.491	9.91201e-06	HOXC13
MA1655.1	1.6164e-08	0.446655	0.75	0.495	1.02318e-05	ZNF341
MA0528.2	1.6856e-08	0.446589	0.779	0.478	1.06698e-05	ZNF263
MA0731.1	2.25385e-08	0.55688	0.757	0.492	1.42669e-05	BCL6B
MA0872.1	2.61288e-08	0.447432	0.787	0.503	1.65395e-05	TFAP2A(var.3)
MA1636.1	2.69972e-08	0.613328	0.735	0.497	1.70892e-05	CEBPG(var.2)
MA1421.1	4.31587e-08	0.644136	0.662	0.479	2.73194e-05	TCF7L1
MA0463.2	4.39108e-08	0.684596	0.721	0.493	2.77955e-05	BCL6
MA0775.1	5.61283e-08	1.05752	0.676	0.487	3.55292e-05	MEIS3
MA0757.1	5.72007e-08	0.773817	0.64	0.477	3.62081e-05	ONECUT3
MA1657.1	6.76029e-08	0.795906	0.691	0.476	4.27926e-05	ZNF652
MA0845.1	6.85378e-08	1.42275	0.625	0.478	4.33844e-05	FOXB1
MA0112.3	6.95719e-08	-1.09799	0.294	0.469	4.4039e-05	ESR1
MA0154.4	7.98046e-08	0.374479	0.779	0.52	5.05163e-05	EBF1
MA0714.1	8.11388e-08	0.700865	0.706	0.492	5.13609e-05	PITX3
MA0908.1	8.6782e-08	0.645952	0.691	0.477	5.4933e-05	HOXD11
MA0051.1	1.01144e-07	-1.91964	0.265	0.448	6.40239e-05	IRF2
MA0882.1	1.10568e-07	0.720159	0.713	0.491	6.99896e-05	DLX6
MA0838.1	1.14787e-07	-0.145774	0.743	0.456	7.26601e-05	CEBPG
MA0665.1	1.15755e-07	0.527245	0.721	0.483	7.32731e-05	MSC
MA0610.1	1.27561e-07	0.630574	0.706	0.489	8.0746e-05	DMRT3
MA1583.1	1.36483e-07	0.591585	0.662	0.497	8.63938e-05	ZFP57
MA0130.1	1.43427e-07	0.459301	0.728	0.491	9.07894e-05	ZNF354C
MA0513.1	1.53153e-07	0.553592	0.735	0.506	9.69456e-05	SMAD2::SMAD3::SMAD4
MA1545.1	1.56198e-07	-1.06599	0.294	0.484	9.88731e-05	OVOL2
MA0686.1	1.57221e-07	-0.95432	0.301	0.488	9.95206e-05	SPDEF
MA0508.3	1.60941e-07	0.336943	0.757	0.46	0.000101876	PRDM1
MA0682.2	1.63333e-07	0.500843	0.735	0.494	0.00010339	PITX1
MA1544.1	1.69953e-07	-1.13018	0.316	0.482	0.00010758	OVOL1
MA1565.1	1.87893e-07	0.575467	0.721	0.505	0.000118936	TBX18
MA1600.1	2.29133e-07	0.361868	0.728	0.491	0.000145041	ZNF684
MA0802.1	2.37496e-07	0.674325	0.691	0.499	0.000150335	TBR1
MA1518.1	2.40734e-07	0.70533	0.721	0.491	0.000152385	LHX1
MA0914.1	2.55537e-07	0.745731	0.713	0.497	0.000161755	ISL2
MA1592.1	2.79489e-07	0.455079	0.706	0.473	0.000176917	ZNF274
MA0003.4	2.82806e-07	0.0983574	0.787	0.486	0.000179016	TFAP2A
MA1100.2	3.31274e-07	0.478388	0.684	0.498	0.000209697	ASCL1
MA0648.1	3.87406e-07	0.548319	0.721	0.49	0.000245228	GSC
MA0499.2	6.06983e-07	0.514586	0.691	0.508	0.00038422	MYOD1
MA0779.1	6.79997e-07	0.7295	0.684	0.473	0.000430438	PAX1
MA0632.2	7.22012e-07	0.801996	0.654	0.465	0.000457033	TCFL5
MA1485.1	8.11538e-07	0.577371	0.669	0.49	0.000513703	FERD3L
MA0605.2	8.69934e-07	0.454019	0.721	0.462	0.000550668	ATF3
MA0656.1	9.05133e-07	0.538965	0.691	0.463	0.000572949	JDP2(var.2)
MA1646.1	9.91804e-07	0.475071	0.728	0.486	0.000627812	OSR2
MA0756.1	9.99205e-07	0.757963	0.647	0.476	0.000632497	ONECUT2
MA0814.2	1.19195e-06	0.223434	0.794	0.494	0.000754504	TFAP2C(var.2)
MA0729.1	1.23294e-06	-1.142	0.309	0.47	0.00078045	RARA
MA1584.1	1.23404e-06	0.559917	0.713	0.474	0.000781145	ZIC5
MA0009.2	1.72236e-06	0.469604	0.64	0.502	0.00109026	TBXT
MA1653.1	1.8482e-06	0.430353	0.721	0.442	0.00116991	ZNF148
MA1558.1	2.07207e-06	0.253662	0.75	0.521	0.00131162	SNAI1
MA1637.1	2.54019e-06	0.476457	0.735	0.509	0.00160794	EBF3
MA0160.1	2.80206e-06	-2.0733	0.279	0.423	0.00177371	NR4A2
MA0696.1	2.98874e-06	0.510138	0.676	0.474	0.00189187	ZIC1
MA0795.1	3.94193e-06	0.520479	0.676	0.49	0.00249524	SMAD3
MA1127.1	4.172e-06	0.853333	0.684	0.474	0.00264088	FOSB::JUN
MA1602.1	4.25152e-06	0.5	0.699	0.482	0.00269121	ZSCAN29
MA1588.1	6.1276e-06	0.591692	0.654	0.48	0.00387877	ZNF136
MA0149.1	6.33017e-06	-0.0432399	0.757	0.435	0.004007	EWSR1-FLI1
MA1649.1	7.32089e-06	0.350316	0.728	0.493	0.00463412	ZBTB12
MA0752.1	7.434e-06	0.477738	0.669	0.483	0.00470572	ZNF410
MA0681.2	7.80131e-06	0.426318	0.669	0.472	0.00493823	PHOX2B
MA0635.1	8.27188e-06	0.554038	0.647	0.485	0.0052361	BARHL2
MA0767.1	8.3519e-06	0.467374	0.632	0.485	0.00528675	GCM2
MA0800.1	9.7726e-06	0.408216	0.676	0.49	0.00618606	EOMES
MA0666.1	9.95026e-06	0.382344	0.706	0.494	0.00629852	MSX1
MA0708.1	9.95026e-06	0.382344	0.706	0.494	0.00629852	MSX2
MA0876.1	9.95026e-06	0.382344	0.706	0.494	0.00629852	BSX
MA0712.2	1.11736e-05	0.255725	0.706	0.489	0.00707288	OTX2
MA0690.1	1.24856e-05	0.416578	0.64	0.495	0.0079034	TBX21
MA0801.1	1.45323e-05	0.522849	0.691	0.511	0.00919892	MGA
MA0803.1	1.45323e-05	0.522849	0.691	0.511	0.00919892	TBX15
MA0819.1	1.46629e-05	0.605825	0.603	0.484	0.00928164	CLOCK
MA1496.1	1.50422e-05	0.553463	0.669	0.492	0.00952174	HOXA4
MA0783.1	1.51805e-05	0.576609	0.654	0.496	0.00960928	PKNOX2
MA1111.1	1.66971e-05	-2.7676	0.272	0.401	0.0105692	NR2F2
MA0046.2	1.79254e-05	0.440913	0.684	0.487	0.0113468	HNF1A
MA1493.1	1.89865e-05	0.546175	0.654	0.485	0.0120185	HES6
MA0753.2	2.36574e-05	0.376572	0.662	0.465	0.0149751	ZNF740
MA0048.2	2.55277e-05	0.547297	0.691	0.499	0.016159	NHLH1
MA0496.3	3.00077e-05	-0.0760403	0.699	0.511	0.0189949	MAFK
MA1635.1	3.09013e-05	0.354813	0.713	0.503	0.0195606	BHLHE22(var.2)
MA1641.1	3.09199e-05	0.446358	0.699	0.489	0.0195723	MYF5
MA0038.2	3.52223e-05	0.226893	0.662	0.504	0.0222957	GFI1
MA1479.1	3.92786e-05	0.353818	0.713	0.481	0.0248634	DMRTC2
MA0735.1	4.02979e-05	0.528674	0.654	0.479	0.0255086	GLIS1
MA0754.1	4.63368e-05	0.657184	0.618	0.485	0.0293312	CUX1
MA0095.2	4.77487e-05	-0.523142	0.382	0.492	0.0302249	YY1
MA0088.2	5.02575e-05	0.362819	0.706	0.483	0.031813	ZNF143
MA0069.1	5.14709e-05	0.352867	0.684	0.486	0.0325811	PAX6
MA0863.1	5.36932e-05	0.5563	0.676	0.488	0.0339878	MTF1
MA1472.1	5.84513e-05	0.25824	0.706	0.496	0.0369997	BHLHA15(var.2)
MA0673.1	5.86674e-05	0.318951	0.706	0.479	0.0371365	NKX2-8
MA0748.2	5.99e-05	-0.960981	0.301	0.483	0.0379167	YY2
MA0488.1	6.49811e-05	0.205639	0.684	0.456	0.041133	JUN
MA0895.1	6.66448e-05	0.525006	0.618	0.478	0.0421862	HMBOX1
MA1566.1	6.78433e-05	0.374417	0.632	0.508	0.0429448	TBX3
MA0492.1	7.67524e-05	0.29621	0.654	0.459	0.0485843	JUND(var.2)
MA0507.1	7.80175e-05	0.429312	0.676	0.475	0.0493851	POU2F2
MA1154.1	7.9864e-05	0.154344	0.691	0.467	0.0505539	ZNF282
MA0711.1	0.000105141	0.839261	0.61	0.485	0.0665544	OTX1
MA1597.1	0.000112733	0.130425	0.743	0.491	0.0713601	ZNF528
MA0737.1	0.000113584	0.304547	0.625	0.479	0.0718984	GLIS3
MA0684.2	0.000115877	-0.647564	0.309	0.472	0.0733502	RUNX3
MA1514.1	0.000124052	0.419996	0.618	0.477	0.0785246	KLF17
MA0057.1	0.000168263	0.348978	0.662	0.453	0.10651	MZF1(var.2)
MA0620.3	0.000169597	-1.64441	0.338	0.428	0.107355	MITF
MA1112.2	0.000186852	-1.96429	0.338	0.424	0.118277	NR4A1
MA0740.1	0.000195002	0.502427	0.603	0.491	0.123436	KLF14
MA0527.1	0.000249899	0.576943	0.566	0.477	0.158186	ZBTB33
MA0826.1	0.000254715	0.480891	0.647	0.488	0.161235	OLIG1
MA0139.1	0.00027663	-0.206095	0.331	0.475	0.175107	CTCF
MA1585.1	0.000278379	0.351169	0.632	0.498	0.176214	ZKSCAN1
MA1471.1	0.000287138	0.502743	0.632	0.494	0.181758	BARX2
MA0755.1	0.000326166	0.582376	0.596	0.486	0.206463	CUX2
MA1498.1	0.000389579	0.282433	0.676	0.486	0.246603	HOXA7
MA1502.1	0.000389579	0.282433	0.676	0.486	0.246603	HOXB8
MA0910.2	0.000389579	0.282433	0.676	0.486	0.246603	HOXD8
MA0506.1	0.00039189	0.670023	0.596	0.457	0.248066	NRF1
MA1114.1	0.000411028	0.338015	0.669	0.491	0.260181	PBX3
MA1580.1	0.00054671	0.618625	0.559	0.499	0.346067	ZBTB32
MA0101.1	0.00055842	-1.16912	0.728	0.465	0.35348	REL
MA0691.1	0.00057444	0.120656	0.669	0.483	0.363621	TFAP4
MA0806.1	0.000677695	0.528603	0.647	0.511	0.428981	TBX4
MA0807.1	0.000677695	0.528603	0.647	0.511	0.428981	TBX5
MA0131.2	0.000690976	0.528586	0.559	0.475	0.437388	HINFP
MA1556.1	0.000735045	-0.571067	0.353	0.483	0.465283	RXRG(var.2)
MA1139.1	0.000794108	0.336078	0.596	0.467	0.50267	FOSL2::JUNB(var.2)
MA0672.1	0.00101201	0.377271	0.61	0.479	0.640601	NKX2-3
MA0745.2	0.00108838	0.107127	0.647	0.52	0.688947	SNAI2
MA0827.1	0.00124502	0.427389	0.618	0.481	0.788097	OLIG3
MA0667.1	0.00127472	0.153739	0.64	0.474	0.806896	MYF6
MA0724.1	0.00132788	0.537112	0.559	0.493	0.84055	VENTX
MA0137.3	0.00141122	-0.186732	0.684	0.457	0.893304	STAT1
MA0107.1	0.00153696	-1.35895	0.706	0.461	0.972897	RELA
MA0668.1	0.00164969	0.328187	0.596	0.483	1	NEUROD2
MA0817.1	0.0017251	0.337133	0.64	0.488	1	BHLHE23
MA0864.2	0.00179316	-0.352153	0.368	0.496	1	E2F2
MA0751.1	0.00194209	0.329526	0.625	0.478	1	ZIC4
MA0502.2	0.00266574	0.21739	0.625	0.499	1	NFYB
MA1145.1	0.00306548	0.369602	0.559	0.459	1	FOSL2::JUND(var.2)
MA0155.1	0.00310547	0.128854	0.662	0.476	1	INSM1
MA1593.1	0.00310704	0.127064	0.625	0.475	1	ZNF317
MA0736.1	0.00320762	0.20155	0.647	0.464	1	GLIS2
MA1572.1	0.00349987	0.326741	0.632	0.493	1	TGIF2LY
MA0113.3	0.00406076	0.457053	0.596	0.485	1	NR3C1
MA1567.1	0.00435907	0.282057	0.618	0.508	1	TBX6
MA0734.2	0.00477522	0.229163	0.647	0.466	1	GLI2
MA1480.1	0.00504052	0.189208	0.676	0.487	1	DPRX
MA1535.1	0.00518424	-1.17258	0.353	0.457	1	NR2C1
MA0805.1	0.00538536	0.278492	0.596	0.507	1	TBX1
MA0766.2	0.00550904	0.586707	0.574	0.489	1	GATA5
MA0698.1	0.00568721	0.0067481	0.632	0.504	1	ZBTB18
MA0625.1	0.00578234	0.228564	0.632	0.451	1	NFATC3
MA0159.1	0.00592546	0.0932447	0.662	0.489	1	RARA::RXRA
MA0831.2	0.0062015	-1.66091	0.368	0.425	1	TFE3
MA0138.2	0.0064485	0.188494	0.699	0.497	1	REST
MA0500.2	0.00656417	0.0723575	0.603	0.494	1	MYOG
MA0056.2	0.00724289	-0.0779068	0.669	0.462	1	MZF1
MA0719.1	0.00740495	0.128627	0.647	0.492	1	RHOXF1
MA0464.2	0.00763051	-0.563547	0.412	0.474	1	BHLHE40
MA1581.1	0.00810856	0.174562	0.625	0.495	1	ZBTB6
MA1536.1	0.00878463	-1.50331	0.419	0.446	1	NR2C2(var.2)
MA1571.1	0.00900061	0.238964	0.618	0.489	1	TGIF2LX
MA1531.1	0.00908609	-0.767788	0.404	0.488	1	NR1D1
MA0797.1	0.00917225	0.321955	0.632	0.493	1	TGIF2
MA1110.1	0.0093636	-1.17002	0.382	0.466	1	NR1H4
MA0877.2	0.00950762	0.310316	0.588	0.483	1	BARHL1
MA1539.1	0.00961495	-0.593453	0.368	0.478	1	NR2F6(var.3)
MA1106.1	0.00985333	0.278146	0.61	0.495	1	HIF1A
MA1533.1	0.01015	0.215009	0.551	0.485	1	NR1I2
MA1136.1	0.0106256	0.494016	0.574	0.472	1	FOSB::JUNB(var.2)
MA0100.3	0.0108542	0.363417	0.588	0.48	1	MYB
MA1573.1	0.0109919	0.142486	0.64	0.486	1	THAP11
MA0035.4	0.0112227	0.458338	0.559	0.482	1	GATA1
MA0774.1	0.0122251	0.662953	0.559	0.478	1	MEIS2
MA1131.1	0.0126776	0.158496	0.632	0.465	1	FOSL2::JUN(var.2)
MA1547.1	0.0134263	0.234619	0.603	0.491	1	PITX2
MA0070.1	0.0152827	0.258816	0.603	0.498	1	PBX1
MA0692.1	0.0157159	-1.36122	0.404	0.424	1	TFEB
MA1559.1	0.0158603	0.00434544	0.676	0.52	1	SNAI3
MA1534.1	0.0158678	0.189303	0.551	0.477	1	NR1I3
MA0781.1	0.0164415	0.183993	0.588	0.481	1	PAX9
MA0799.1	0.0164981	-0.230692	0.441	0.494	1	RFX4
MA1491.1	0.0176927	0.0881304	0.625	0.457	1	GLI3
MA0659.2	0.0187206	0.0833358	0.588	0.46	1	MAFG
MA0818.1	0.0191141	0.182627	0.632	0.485	1	BHLHE22
MA0074.1	0.0205966	0.232848	0.581	0.48	1	RXRA::VDR
MA1524.1	0.021375	0.282194	0.632	0.478	1	MSGN1
MA0678.1	0.0215293	0.228052	0.596	0.484	1	OLIG2
MA0663.1	0.0216161	-0.550082	0.397	0.464	1	MLX
MA0796.1	0.0234867	0.363683	0.588	0.498	1	TGIF1
MA1470.1	0.023833	0.237074	0.61	0.484	1	BACH2(var.2)
MA0862.1	0.0251659	0.301228	0.529	0.487	1	GMEB2
MA0063.2	0.0278848	0.235548	0.559	0.474	1	NKX2-5
MA1474.1	0.0281501	0.614383	0.596	0.473	1	CREB3L4
MA0259.1	0.0283374	0.337704	0.596	0.487	1	ARNT::HIF1A
MA0470.2	0.0297995	-0.376749	0.441	0.495	1	E2F4
MA0727.1	0.0347041	0.308916	0.61	0.481	1	NR3C2
MA0664.1	0.0363613	-0.567769	0.434	0.459	1	MLXIPL
MA0495.3	0.0364042	-0.00892757	0.603	0.466	1	MAFF
MA1575.1	0.0410773	0.240274	0.581	0.478	1	THRB(var.2)
MA0105.4	0.0412924	-0.766829	0.412	0.482	1	NFKB1
MA1420.1	0.0426846	-0.701572	0.456	0.475	1	IRF5
MA1467.1	0.0432968	-0.158196	0.618	0.486	1	ATOH1(var.2)
MA1555.1	0.043537	-0.258785	0.426	0.482	1	RXRB(var.2)
MA1647.1	0.0470073	-0.625826	0.647	0.425	1	PRDM4
MA0636.1	0.048112	-0.416595	0.404	0.462	1	BHLHE41
MA1538.1	0.0495268	-0.177792	0.419	0.468	1	NR2F1(var.3)
MA1147.1	0.051609	-0.222698	0.382	0.474	1	NR4A2::RXRA
MA0147.3	0.0553399	0.233355	0.574	0.463	1	MYC
MA0822.1	0.0553656	-0.479291	0.419	0.481	1	HES7
MA0071.1	0.0568505	-0.660018	0.426	0.459	1	RORA
MA0834.1	0.0582551	0.593594	0.559	0.475	1	ATF7
MA0778.1	0.0638176	-0.688236	0.426	0.487	1	NFKB2
MA0486.2	0.06532	0.0920124	0.61	0.471	1	HSF1
MA0758.1	0.0719769	0.0985172	0.596	0.478	1	E2F7
MA0104.4	0.0726514	0.157249	0.588	0.472	1	MYCN
MA0140.2	0.074235	0.226781	0.581	0.489	1	GATA1::TAL1
MA0738.1	0.0767626	-0.0529257	0.588	0.499	1	HIC2
MA0839.1	0.077454	0.434173	0.551	0.479	1	CREB3L1
MA0484.2	0.0784493	-0.259085	0.625	0.471	1	HNF4G
MA0770.1	0.0885407	-0.170192	0.559	0.473	1	HSF2
MA1129.1	0.090249	0.255036	0.559	0.477	1	FOSL1::JUN(var.2)
MA0114.4	0.091397	-0.298033	0.647	0.47	1	HNF4A
MA1645.1	0.0914752	0.0915396	0.581	0.485	1	NKX2-2
MA0526.3	0.0915052	-2.09469	0.5	0.413	1	USF2
MA0596.1	0.0938364	-0.0202156	0.603	0.489	1	SREBF2
MA1594.1	0.100383	0.0808154	0.588	0.477	1	ZNF382
MA0115.1	0.103449	-0.616566	0.441	0.45	1	NR1H2::RXRA
MA1552.1	0.103675	-0.325505	0.441	0.494	1	RARB(var.3)
MA0258.2	0.112104	-0.688912	0.449	0.477	1	ESR2
MA0083.3	0.115495	0.145062	0.559	0.465	1	SRF
MA0509.2	0.116348	0.225235	0.566	0.493	1	RFX1
MA1546.1	0.116441	0.164489	0.603	0.483	1	PAX3(var.2)
MA0093.3	0.120391	-1.62331	0.456	0.422	1	USF1
MA0821.1	0.122928	-0.588924	0.426	0.476	1	HES5
MA0595.1	0.131889	0.078596	0.588	0.494	1	SREBF1
MA1148.1	0.138563	-0.199565	0.588	0.463	1	PPARA::RXRA
MA0771.1	0.142785	-0.00983293	0.581	0.48	1	HSF4
MA0511.2	0.152441	-0.0875812	0.412	0.472	1	RUNX2
MA0865.1	0.15628	0.273284	0.551	0.465	1	E2F8
MA0637.1	0.171851	0.208798	0.537	0.485	1	CENPB
MA0141.3	0.173454	-1.01225	0.419	0.432	1	ESRRB
MA0594.2	0.174575	0.100549	0.588	0.483	1	HOXA9
MA1143.1	0.175949	0.179864	0.566	0.484	1	FOSL1::JUND(var.2)
MA0600.2	0.177976	-0.0155938	0.434	0.494	1	RFX2
MA1102.2	0.193509	-0.101935	0.463	0.467	1	CTCFL
MA1548.1	0.19697	0.0107449	0.618	0.478	1	PLAGL2
MA0871.2	0.212572	-0.526549	0.449	0.445	1	TFEC
MA0777.1	0.214196	0.224531	0.529	0.487	1	MYBL2
MA0749.1	0.21968	-0.258055	0.426	0.49	1	ZBED1
MA0073.1	0.220795	-0.140588	0.463	0.465	1	RREB1
MA0072.1	0.227444	-0.151415	0.478	0.472	1	RORA(var.2)
MA1652.1	0.230295	-1.79911	0.404	0.374	1	ZKSCAN5
MA1109.1	0.244238	0.12647	0.581	0.477	1	NEUROD1
MA0842.2	0.246842	-0.168557	0.574	0.479	1	NRL
MA1099.2	0.247339	-0.0761606	0.507	0.474	1	HES1
MA0510.2	0.249864	0.0510324	0.493	0.493	1	RFX5
MA0091.1	0.254164	-0.154219	0.603	0.474	1	TAL1::TCF3
MA0014.3	0.255058	-0.102204	0.603	0.465	1	PAX5
MA1651.1	0.26578	0.140376	0.485	0.489	1	ZFP42
MA0856.1	0.271072	-0.694663	0.485	0.454	1	RXRG
MA0623.2	0.272047	0.121689	0.559	0.488	1	NEUROG1
MA0060.3	0.277832	-0.278091	0.478	0.511	1	NFYA
MA1464.1	0.28131	-0.383188	0.471	0.452	1	ARNT2
MA0669.1	0.30232	-0.134724	0.588	0.48	1	NEUROG2
MA0844.1	0.313482	0.139031	0.522	0.479	1	XBP1
MA0592.3	0.326648	-0.865847	0.419	0.439	1	ESRRA
MA0828.1	0.328101	0.0566928	0.559	0.482	1	SREBF2(var.2)
MA0823.1	0.333892	0.0665284	0.529	0.465	1	HEY1
MA1126.1	0.335207	0.00253268	0.537	0.46	1	FOS::JUN(var.2)
MA1578.1	0.366806	0.080765	0.566	0.462	1	VEZF1
MA1523.1	0.381455	0.0745755	0.551	0.477	1	MSANTD3
MA1108.2	0.397546	-0.339603	0.551	0.491	1	MXI1
MA1475.1	0.407349	-0.0527872	0.493	0.467	1	CREB3L4(var.2)
MA1632.1	0.40922	-0.854073	0.603	0.441	1	ATF2
MA0018.4	0.41462	-0.157743	0.5	0.44	1	CREB1
MA1541.1	0.423108	-0.355205	0.559	0.454	1	NR6A1
MA0504.1	0.429914	-0.214506	0.522	0.459	1	NR2C2
MA0469.3	0.433078	0.191126	0.515	0.495	1	E2F3
MA0638.1	0.433531	0.168668	0.515	0.483	1	CREB3
MA1494.1	0.43391	-0.183385	0.522	0.48	1	HNF4A(var.2)
MA1542.1	0.434239	0.176486	0.522	0.491	1	OSR1
MA1554.1	0.441793	0.210057	0.559	0.501	1	RFX7
MA1570.1	0.466563	-0.360069	0.471	0.46	1	TFAP4(var.2)
MA0794.1	0.476449	0.023617	0.544	0.484	1	PROX1
MA1560.1	0.499443	0.112915	0.537	0.484	1	SOHLH2
MA1642.1	0.4997	-0.0916356	0.544	0.477	1	NEUROG2(var.2)
MA1150.1	0.501519	-0.325121	0.522	0.475	1	RORB
MA0782.2	0.50717	0.00660568	0.537	0.487	1	PKNOX1
MA1146.1	0.514638	-0.196588	0.412	0.471	1	NR1H4::RXRA
MA0058.3	0.51998	-0.0872975	0.596	0.465	1	MAX
MA1540.1	0.592022	-0.980047	0.456	0.444	1	NR5A1
MA1550.1	0.598366	-0.529777	0.485	0.464	1	PPARD
MA0695.1	0.613057	0.0586714	0.426	0.484	1	ZBTB7C
MA1644.1	0.647354	-0.116342	0.544	0.503	1	NFYC
MA0694.1	0.672935	0.129495	0.478	0.477	1	ZBTB7B
MA1568.1	0.673428	0.0309415	0.5	0.475	1	TCF21(var.2)
MA0024.3	0.676578	0.0657544	0.456	0.487	1	E2F1
MA0037.3	0.689479	0.129998	0.478	0.483	1	GATA3
MA1638.1	0.694209	-0.350256	0.559	0.48	1	HAND2
MA0163.1	0.712748	-0.191499	0.537	0.452	1	PLAG1
MA0829.2	0.713528	-0.216612	0.507	0.487	1	SREBF1(var.2)
MA1574.1	0.727865	-0.603208	0.456	0.453	1	THRB
MA0693.2	0.730465	-0.202288	0.493	0.487	1	VDR
MA0616.2	0.748423	0.0509978	0.529	0.47	1	HES2
MA0855.1	0.754867	-0.684396	0.515	0.454	1	RXRB
MA1149.1	0.76204	-0.364016	0.529	0.474	1	RARA::RXRG
MA1576.1	0.780795	-0.252829	0.551	0.477	1	THRB(var.3)
MA1466.1	0.789943	-0.019009	0.478	0.488	1	ATF6
MA0649.1	0.789996	-0.0711025	0.493	0.469	1	HEY2
MA1589.1	0.793962	-0.297812	0.551	0.482	1	ZNF140
MA0825.1	0.807124	-0.0638801	0.566	0.472	1	MNT
MA0066.1	0.836256	-0.213547	0.515	0.489	1	PPARG
MA1151.1	0.839585	-0.0550904	0.485	0.476	1	RORC
MA1553.1	0.866131	-0.04822	0.507	0.49	1	RARG(var.3)
MA0609.2	0.876748	-0.249924	0.522	0.467	1	CREM
MA0059.1	0.889797	-0.195257	0.471	0.47	1	MAX::MYC
MA1123.2	0.893743	-0.544549	0.493	0.479	1	TWIST1
MA0776.1	0.921227	0.0172742	0.449	0.489	1	MYBL1
MA1525.1	0.94428	-0.18927	0.5	0.461	1	NFATC4
MA1133.1	0.953812	0.0389263	0.522	0.467	1	JUN::JUNB(var.2)
MA0798.2	0.955707	0.0041201	0.515	0.489	1	RFX3
MA1468.1	0.95749	-0.266431	0.529	0.473	1	ATOH7
MA0730.1	0.95926	-0.290074	0.5	0.48	1	RARA(var.2)
MA1532.1	0.966538	-0.21014	0.544	0.478	1	NR1D2
MA1537.1	0.96947	-0.721981	0.522	0.459	1	NR2F1(var.2)
MA0036.3	0.972094	0.142855	0.463	0.487	1	GATA2
MA1104.2	0.979525	0.409767	0.522	0.491	1	GATA6
MA1140.2	0.986311	0.0977962	0.5	0.475	1	JUNB(var.2)
MA0482.2	0.998763	0.0416089	0.529	0.485	1	GATA4

## Sheet: Pro KC
Table S18. The chromVAR transcription factor activity between cell types of poorly-differentiated cSCC sample in scATAC-seq data.
	p_val	avg_log2FC	pct.1	pct.2	p_val_adj	gene
MA1121.1	2.22511e-49	2.72531	1	0.495	1.40849e-46	TEAD2
MA0476.1	5.70441e-47	2.63547	0.983	0.468	3.61089e-44	FOS
MA0808.1	2.66939e-50	2.54452	0.989	0.492	1.68973e-47	TEAD3
MA1634.1	2.79753e-47	2.42359	0.978	0.469	1.77083e-44	BATF
MA0809.2	5.9564e-50	2.36809	1	0.492	3.7704e-47	TEAD4
MA0462.2	3.31886e-47	2.32475	0.978	0.468	2.10084e-44	BATF::JUN
MA0478.1	2.64904e-48	2.32045	0.978	0.467	1.67684e-45	FOSL2
MA0841.1	3.33392e-45	2.28984	0.983	0.471	2.11037e-42	NFE2
MA0090.3	1.86778e-50	2.24371	0.983	0.497	1.18231e-47	TEAD1
MA0835.2	3.18148e-46	2.20344	0.978	0.469	2.01388e-43	BATF3
MA0099.3	6.25765e-50	2.07346	0.978	0.465	3.9611e-47	FOS::JUN
MA1138.1	5.04377e-49	2.05191	0.978	0.463	3.1927e-46	FOSL2::JUNB
MA1134.1	4.59322e-49	1.9868	0.978	0.464	2.90751e-46	FOS::JUNB
MA0106.3	1.94446e-42	1.85364	0.983	0.44	1.23084e-39	TP53
MA1144.1	2.60968e-49	1.78728	0.978	0.461	1.65193e-46	FOSL2::JUND
MA0525.2	1.10938e-36	1.78082	0.944	0.438	7.02235e-34	TP63
MA0655.1	1.14818e-46	1.77566	0.983	0.46	7.26796e-44	JDP2
MA1135.1	2.40736e-49	1.7618	0.978	0.462	1.52386e-46	FOSB::JUNB
MA1643.1	4.17963e-33	1.74272	0.944	0.507	2.64571e-30	NFIB
MA1527.1	2.65643e-36	1.74108	0.944	0.51	1.68152e-33	NFIC(var.2)
MA1130.1	3.41896e-48	1.71979	0.978	0.463	2.1642e-45	FOSL2::JUN
MA1101.2	4.52735e-45	1.6747	0.978	0.467	2.86581e-42	BACH2
MA1528.1	2.67712e-38	1.61423	0.95	0.497	1.69462e-35	NFIX(var.2)
MA0861.1	4.66255e-42	1.61106	0.989	0.435	2.9514e-39	TP73
MA0811.1	3.43375e-37	1.55984	0.928	0.481	2.17357e-34	TFAP2B
MA1516.1	1.55175e-20	1.555	0.761	0.476	9.82257e-18	KLF3
MA0524.2	2.88527e-40	1.55304	0.944	0.478	1.82638e-37	TFAP2C
MA0089.2	6.33115e-36	1.53112	0.961	0.509	4.00762e-33	NFE2L1
MA0491.2	1.88184e-48	1.52263	0.978	0.464	1.19121e-45	JUND
MA1639.1	4.62582e-23	1.5135	0.856	0.481	2.92814e-20	MEIS1(var.2)
MA1128.1	1.11334e-48	1.50836	0.978	0.465	7.04741e-46	FOSL1::JUN
MA0477.2	2.89064e-49	1.4207	0.978	0.464	1.82977e-46	FOSL1
MA0501.1	5.0383e-32	1.41806	0.972	0.506	3.18925e-29	MAF::NFE2
MA0496.3	6.31512e-38	1.40168	0.956	0.5	3.99747e-35	MAFK
MA0003.4	4.25094e-36	1.31057	0.933	0.478	2.69084e-33	TFAP2A
MA0820.1	1.68675e-21	1.30851	0.844	0.493	1.06771e-18	FIGLA
MA0725.1	2.48873e-22	1.27376	0.806	0.487	1.57536e-19	VSX1
MA0810.1	1.56337e-32	1.2662	0.922	0.49	9.89615e-30	TFAP2A(var.2)
MA0119.1	1.88395e-26	1.25007	0.911	0.508	1.19254e-23	NFIC::TLX1
MA0902.2	1.73884e-25	1.22405	0.856	0.476	1.10068e-22	HOXB2
MA0671.1	1.11769e-17	1.22188	0.811	0.497	7.07498e-15	NFIX
MA0812.1	7.09999e-29	1.17518	0.917	0.493	4.49429e-26	TFAP2B(var.2)
MA0814.2	8.55396e-33	1.17404	0.922	0.487	5.41466e-30	TFAP2C(var.2)
MA1569.1	4.53881e-25	1.16077	0.85	0.494	2.87307e-22	TFAP2E
MA0103.3	1.04231e-31	1.14377	0.939	0.493	6.59781e-29	ZEB1
MA0661.1	6.25937e-21	1.13811	0.778	0.491	3.96218e-18	MEOX1
MA0886.1	4.08022e-25	1.13056	0.833	0.487	2.58278e-22	EMX2
MA0642.1	1.96096e-19	1.12437	0.778	0.484	1.24129e-16	EN2
MA0489.1	5.25718e-48	1.10776	0.978	0.465	3.3278e-45	JUN(var.2)
MA1137.1	3.66324e-47	1.10761	0.972	0.464	2.31883e-44	FOSL1::JUNB
MA1113.2	1.90756e-24	1.10422	0.85	0.475	1.20748e-21	PBX2
MA0644.1	7.79284e-21	1.09785	0.811	0.476	4.93286e-18	ESX1
MA0726.1	7.3762e-24	1.09173	0.811	0.486	4.66913e-21	VSX2
MA0612.2	3.00795e-22	1.08855	0.822	0.48	1.90403e-19	EMX1
MA0706.1	1.23011e-22	1.08554	0.861	0.485	7.78657e-20	MEOX2
MA1132.1	2.89343e-46	1.08374	0.978	0.463	1.83154e-43	JUN::JUNB
MA1529.1	5.66229e-16	1.08131	0.8	0.494	3.58423e-13	NHLH2
MA0161.2	3.33734e-25	1.07708	0.917	0.495	2.11253e-22	NFIC
MA0745.2	7.19411e-13	1.05878	0.733	0.515	4.55387e-10	SNAI2
MA1640.1	1.48934e-20	1.05204	0.861	0.484	9.42755e-18	MEIS2(var.2)
MA1142.1	5.80504e-47	1.04913	0.978	0.464	3.67459e-44	FOSL1::JUND
MA0912.2	5.36007e-18	1.0455	0.772	0.491	3.39293e-15	HOXD3
MA0887.1	8.24122e-25	1.03097	0.844	0.478	5.21669e-22	EVX1
MA0075.3	6.80739e-15	1.02965	0.756	0.483	4.30908e-12	PRRX2
MA0882.1	7.36246e-23	1.0279	0.828	0.485	4.66044e-20	DLX6
MA0670.1	4.74942e-22	1.02634	0.85	0.493	3.00638e-19	NFIA
MA0513.1	2.38243e-18	1.02615	0.822	0.501	1.50808e-15	SMAD2::SMAD3::SMAD4
MA0722.1	4.25615e-24	1.02189	0.861	0.485	2.69415e-21	VAX1
MA0723.1	4.25615e-24	1.02189	0.861	0.485	2.69415e-21	VAX2
MA1495.1	7.98155e-20	1.01389	0.783	0.487	5.05232e-17	HOXA1
MA0900.2	7.98155e-20	1.01389	0.783	0.487	5.05232e-17	HOXA2
MA0683.1	8.58487e-17	1.00756	0.772	0.484	5.43422e-14	POU4F2
MA0743.2	3.80784e-19	1.00503	0.806	0.491	2.41036e-16	SCRT1
MA1497.1	1.29597e-22	0.996657	0.856	0.479	8.20348e-20	HOXA6
MA1501.1	3.26708e-23	0.995192	0.811	0.481	2.06806e-20	HOXB7
MA1116.1	1.26781e-19	0.99024	0.861	0.528	8.02525e-17	RBPJ
MA0675.1	4.2191e-16	0.981912	0.772	0.473	2.67069e-13	NKX6-2
MA0878.2	3.33532e-17	0.976879	0.789	0.487	2.11125e-14	CDX1
MA0893.2	1.78861e-21	0.97492	0.817	0.483	1.13219e-18	GSX2
MA0654.1	2.57448e-15	0.959819	0.756	0.486	1.62964e-12	ISX
MA0701.2	2.57448e-15	0.959819	0.756	0.486	1.62964e-12	LHX9
MA0132.2	7.91764e-23	0.95917	0.856	0.478	5.01186e-20	PDX1
MA1481.1	7.91764e-23	0.95917	0.856	0.478	5.01186e-20	DRGX
MA0699.1	7.254e-17	0.957394	0.811	0.475	4.59178e-14	LBX2
MA0888.1	1.18873e-20	0.948586	0.789	0.486	7.52469e-18	EVX2
MA0618.1	6.96591e-14	0.941387	0.722	0.477	4.40942e-11	LBX1
MA0710.1	1.74664e-16	0.938558	0.772	0.482	1.10562e-13	NOTO
MA0901.2	8.89989e-16	0.937027	0.744	0.478	5.63363e-13	HOXB13
MA0158.2	1.27434e-13	0.936624	0.717	0.485	8.06657e-11	HOXA5
MA0890.1	8.85514e-18	0.935502	0.794	0.483	5.6053e-15	GBX2
MA1504.1	6.05586e-08	0.930738	0.711	0.489	3.83336e-05	HOXC4
MA1119.1	2.87586e-10	0.930106	0.733	0.487	1.82042e-07	SIX2
MA0889.1	1.35705e-17	0.928491	0.75	0.486	8.59015e-15	GBX1
MA0830.2	1.98325e-24	0.919114	0.839	0.51	1.2554e-21	TCF4
MA0522.3	1.94467e-21	0.907276	0.85	0.51	1.23098e-18	TCF3
MA0793.1	2.00049e-17	0.900992	0.817	0.489	1.26631e-14	POU6F2
MA1506.1	3.1605e-13	0.896301	0.711	0.474	2.0006e-10	HOXD10
MA1648.1	4.52679e-23	0.895963	0.85	0.509	2.86546e-20	TCF12(var.2)
MA1631.1	3.49778e-22	0.895052	0.833	0.504	2.2141e-19	ASCL1(var.2)
MA1599.1	3.50979e-13	0.891681	0.761	0.494	2.2217e-10	ZNF682
MA0903.1	1.39349e-21	0.89097	0.844	0.48	8.82076e-19	HOXB3
MA0674.1	1.43268e-15	0.885454	0.75	0.485	9.06886e-13	NKX6-1
MA0817.1	2.2307e-06	0.885428	0.683	0.485	0.00141203	BHLHE23
MA0048.2	2.17568e-10	0.883691	0.717	0.496	1.37721e-07	NHLH1
MA0597.1	5.99883e-21	0.879994	0.844	0.492	3.79726e-18	THAP1
MA1100.2	3.32155e-14	0.877497	0.767	0.494	2.10254e-11	ASCL1
MA0731.1	1.4637e-09	0.875435	0.767	0.489	9.26525e-07	BCL6B
MA1635.1	7.74555e-13	0.872758	0.8	0.498	4.90293e-10	BHLHE22(var.2)
MA1124.1	7.76529e-16	0.869249	0.839	0.492	4.91543e-13	ZNF24
MA1473.1	5.51739e-18	0.864744	0.822	0.482	3.49251e-15	CDX4
MA0892.1	1.18031e-16	0.856633	0.778	0.485	7.47136e-14	GSX1
MA0634.1	1.27971e-16	0.852237	0.756	0.474	8.10057e-14	ALX3
MA0027.2	5.85196e-18	0.846675	0.806	0.477	3.70429e-15	EN1
MA1517.1	4.03273e-16	0.843172	0.733	0.48	2.55272e-13	KLF6
MA1577.1	8.43432e-12	0.841882	0.783	0.484	5.33892e-09	TLX2
MA1649.1	1.48062e-12	0.841041	0.794	0.489	9.37233e-10	ZBTB12
MA0791.1	4.84974e-16	0.840402	0.783	0.477	3.06988e-13	POU4F3
MA0744.2	1.96221e-11	0.839552	0.689	0.487	1.24208e-08	SCRT2
MA0846.1	7.11389e-06	0.839328	0.644	0.479	0.00450309	FOXC2
MA1515.1	7.78079e-12	0.83748	0.722	0.48	4.92524e-09	KLF2
MA0716.1	8.12186e-11	0.83466	0.694	0.482	5.14114e-08	PRRX1
MA0721.1	8.12186e-11	0.83466	0.694	0.482	5.14114e-08	UNCX
MA0650.2	1.64554e-17	0.824246	0.844	0.484	1.04163e-14	HOXA13
MA0668.1	5.0691e-07	0.822208	0.65	0.48	0.000320874	NEUROD2
MA0790.1	1.99992e-13	0.821486	0.75	0.489	1.26595e-10	POU4F1
MA1521.1	7.08889e-15	0.821076	0.8	0.493	4.48727e-12	MAFA
MA1565.1	1.28072e-11	0.799133	0.7	0.504	8.10697e-09	TBX18
MA0847.2	3.21992e-08	0.799108	0.683	0.477	2.03821e-05	FOXD2
MA0623.2	0.00404271	0.798656	0.644	0.484	1	NEUROG1
MA0913.2	4.03128e-15	0.796643	0.794	0.487	2.5518e-12	HOXD9
MA0815.1	4.80448e-15	0.790703	0.817	0.496	3.04123e-12	TFAP2C(var.3)
MA0703.2	2.51769e-13	0.785656	0.756	0.472	1.59369e-10	LMX1B
MA0904.2	1.77193e-14	0.784525	0.767	0.489	1.12163e-11	HOXB5
MA0718.1	4.37127e-14	0.77714	0.75	0.488	2.76701e-11	RAX
MA1141.1	1.34256e-48	0.776558	0.978	0.468	8.4984e-46	FOS::JUND
MA1549.1	1.20772e-10	0.776212	0.733	0.487	7.64488e-08	POU6F1(var.2)
MA0907.1	4.56497e-10	0.774443	0.689	0.49	2.88963e-07	HOXC13
MA1518.1	4.52625e-16	0.774156	0.811	0.486	2.86512e-13	LHX1
MA0630.1	1.1036e-10	0.770981	0.706	0.483	6.98579e-08	SHOX
MA0717.1	1.1036e-10	0.770981	0.706	0.483	6.98579e-08	RAX2
MA0490.2	6.6191e-46	0.77088	0.983	0.462	4.18989e-43	JUNB
MA1566.1	3.74391e-14	0.767891	0.733	0.503	2.36989e-11	TBX3
MA0894.1	1.71356e-17	0.756857	0.817	0.476	1.08469e-14	HESX1
MA0658.1	1.036e-18	0.752645	0.833	0.485	6.5579e-16	LHX6
MA0813.1	6.35222e-14	0.748698	0.783	0.498	4.02096e-11	TFAP2B(var.3)
MA1583.1	2.20081e-06	0.746504	0.617	0.497	0.00139311	ZFP57
MA0826.1	4.60342e-05	0.737007	0.644	0.487	0.0291397	OLIG1
MA0818.1	3.73581e-06	0.735349	0.683	0.482	0.00236477	BHLHE22
MA0032.2	0.000346927	0.734589	0.628	0.489	0.219605	FOXC1
MA0666.1	3.6722e-13	0.72887	0.772	0.489	2.3245e-10	MSX1
MA0708.1	3.6722e-13	0.72887	0.772	0.489	2.3245e-10	MSX2
MA0876.1	3.6722e-13	0.72887	0.772	0.489	2.3245e-10	BSX
MA1519.1	4.63549e-13	0.722968	0.761	0.481	2.93427e-10	LHX5
MA0068.2	2.09046e-11	0.722714	0.733	0.487	1.32326e-08	PAX4
MA0700.2	2.02976e-14	0.716466	0.75	0.479	1.28484e-11	LHX2
MA1520.1	2.56586e-12	0.715679	0.767	0.494	1.62419e-09	MAF
MA1463.1	6.1666e-15	0.713078	0.756	0.481	3.90346e-12	ARGFX
MA0702.2	2.70395e-13	0.708413	0.739	0.471	1.7116e-10	LMX1A
MA0829.2	4.72691e-06	0.707068	0.622	0.482	0.00299213	SREBF1(var.2)
MA0872.1	4.17585e-12	0.70675	0.8	0.5	2.64331e-09	TFAP2A(var.3)
MA1496.1	4.70688e-07	0.706555	0.672	0.49	0.000297945	HOXA4
MA1567.1	2.04704e-11	0.70066	0.706	0.504	1.29577e-08	TBX6
MA1637.1	3.34893e-14	0.700433	0.85	0.503	2.11987e-11	EBF3
MA0499.2	7.84547e-14	0.696906	0.761	0.504	4.96618e-11	MYOD1
MA0909.2	2.28963e-11	0.69404	0.744	0.479	1.44934e-08	HOXD13
MA1476.1	4.13406e-09	0.682102	0.7	0.489	2.61686e-06	DLX5
MA0154.4	6.43773e-15	0.682014	0.844	0.515	4.07508e-12	EBF1
MA0689.1	6.28658e-07	0.680738	0.633	0.497	0.000397941	TBX20
MA1500.1	5.3759e-12	0.677562	0.711	0.486	3.40295e-09	HOXB6
MA1588.1	4.34543e-06	0.669033	0.656	0.479	0.00275066	ZNF136
MA0899.1	7.47708e-12	0.6655	0.744	0.488	4.73299e-09	HOXA10
MA1499.1	3.66527e-08	0.665274	0.694	0.486	2.32012e-05	HOXB4
MA1507.1	3.66527e-08	0.665274	0.694	0.486	2.32012e-05	HOXD4
MA1530.1	1.04062e-11	0.664359	0.744	0.49	6.58711e-09	NKX6-3
MA0719.1	1.45544e-10	0.658625	0.711	0.488	9.21294e-08	RHOXF1
MA0801.1	2.70997e-14	0.657795	0.772	0.506	1.71541e-11	MGA
MA0803.1	2.70997e-14	0.657795	0.772	0.506	1.71541e-11	TBX15
MA0500.2	1.82986e-08	0.655979	0.717	0.489	1.1583e-05	MYOG
MA0698.1	2.5066e-11	0.655384	0.772	0.498	1.58668e-08	ZBTB18
MA0682.2	1.53749e-08	0.652854	0.711	0.493	9.73232e-06	PITX1
MA0463.2	5.35061e-08	0.650186	0.717	0.491	3.38694e-05	BCL6
MA1559.1	5.64284e-11	0.645295	0.733	0.517	3.57192e-08	SNAI3
MA0845.1	0.135473	0.64527	0.533	0.48	1	FOXB1
MA1505.1	5.78956e-11	0.638094	0.767	0.477	3.66479e-08	HOXC8
MA0662.1	6.44553e-10	0.636329	0.661	0.483	4.08002e-07	MIXL1
MA1118.1	2.36649e-05	0.63553	0.678	0.488	0.0149799	SIX1
MA1656.1	2.28607e-12	0.626646	0.806	0.503	1.44708e-09	ZNF449
MA0806.1	9.66554e-11	0.619186	0.7	0.508	6.11829e-08	TBX4
MA0807.1	9.66554e-11	0.619186	0.7	0.508	6.11829e-08	TBX5
MA0159.1	3.03807e-11	0.615269	0.75	0.485	1.9231e-08	RARA::RXRA
MA1105.2	2.92257e-19	0.605014	0.817	0.474	1.84999e-16	GRHL2
MA0046.2	7.09672e-09	0.604108	0.672	0.486	4.49222e-06	HNF1A
MA0153.2	6.16954e-09	0.601666	0.728	0.49	3.90532e-06	HNF1B
MA1558.1	9.98961e-14	0.600104	0.772	0.518	6.32342e-11	SNAI1
MA0738.1	2.35624e-09	0.596435	0.75	0.492	1.4915e-06	HIC2
MA1600.1	2.30079e-08	0.589977	0.722	0.489	1.4564e-05	ZNF684
MA0130.1	5.73064e-14	0.587347	0.811	0.486	3.62749e-11	ZNF354C
MA0651.1	0.000251107	0.58655	0.583	0.488	0.158951	HOXC11
MA0038.2	1.87526e-08	0.583698	0.756	0.499	1.18704e-05	GFI1
MA0875.1	1.46913e-08	0.579968	0.739	0.479	9.29962e-06	BARX1
MA0778.1	5.43807e-05	0.573536	0.689	0.478	0.034423	NFKB2
MA0827.1	0.000105251	0.5718	0.639	0.479	0.0666241	OLIG3
MA0465.2	4.3517e-09	0.57177	0.711	0.477	2.75463e-06	CDX2
MA1106.1	2.69171e-07	0.569226	0.694	0.491	0.000170385	HIF1A
MA1117.1	1.96041e-09	0.551104	0.789	0.49	1.24094e-06	RELB
MA0647.1	8.15606e-13	0.547642	0.739	0.48	5.16279e-10	GRHL1
MA0079.4	2.19736e-06	0.547388	0.6	0.487	0.00139093	SP1
MA0795.1	9.83614e-09	0.546868	0.722	0.487	6.22628e-06	SMAD3
MA0596.1	1.42753e-06	0.544685	0.722	0.484	0.000903629	SREBF2
MA0805.1	1.10778e-10	0.53835	0.717	0.502	7.01226e-08	TBX1
MA0713.1	3.9698e-06	0.53732	0.656	0.485	0.00251289	PHOX2A
MA0036.3	0.0358596	0.536778	0.6	0.482	1	GATA2
MA0786.1	0.140646	0.535592	0.539	0.49	1	POU3F1
MA0628.1	6.27131e-08	0.532621	0.678	0.488	3.96974e-05	POU6F1
MA1568.1	6.91859e-05	0.531774	0.65	0.47	0.0437947	TCF21(var.2)
MA1557.1	5.03727e-10	0.530496	0.733	0.484	3.18859e-07	SMAD5
MA1579.1	5.48594e-10	0.530355	0.783	0.507	3.4726e-07	ZBTB26
MA0679.2	3.41122e-05	0.527246	0.633	0.482	0.021593	ONECUT1
MA1503.1	0.000814835	0.523022	0.567	0.491	0.515791	HOXB9
MA0145.3	5.88874e-13	0.520862	0.789	0.481	3.72757e-10	TFCP2
MA1585.1	2.92917e-08	0.514905	0.683	0.495	1.85417e-05	ZKSCAN1
MA1547.1	2.4799e-06	0.511526	0.689	0.487	0.00156978	PITX2
MA0914.1	1.06979e-05	0.50922	0.678	0.496	0.00677179	ISL2
MA0714.1	1.90717e-08	0.509052	0.756	0.488	1.20724e-05	PITX3
MA0715.1	0.00245437	0.506617	0.594	0.481	1	PROP1
MA1511.1	3.8645e-12	0.501332	0.761	0.485	2.44623e-09	KLF10
MA0138.2	1.23538e-06	0.500734	0.711	0.494	0.000781997	REST
MA1155.1	1.70174e-07	0.494359	0.75	0.498	0.00010772	ZSCAN4
MA0802.1	1.0768e-05	0.492264	0.65	0.498	0.00681615	TBR1
MA0077.1	1.04279e-08	0.488831	0.75	0.484	6.60085e-06	SOX9
MA0707.1	1.07391e-08	0.487752	0.706	0.483	6.79782e-06	MNX1
MA0043.3	1.47666e-07	0.484215	0.767	0.483	9.34724e-05	HLF
MA1114.1	2.6237e-05	0.474633	0.672	0.489	0.016608	PBX3
MA0678.1	0.00412224	0.473454	0.561	0.484	1	OLIG2
MA0648.1	1.53505e-07	0.472343	0.706	0.489	9.71684e-05	GSC
MA1601.1	3.00064e-09	0.470928	0.789	0.492	1.8994e-06	ZNF75D
MA0712.2	9.04167e-05	0.470861	0.661	0.489	0.0572338	OTX2
MA0610.1	0.000388837	0.470515	0.611	0.49	0.246134	DMRT3
MA0873.1	2.39506e-05	0.462427	0.617	0.485	0.0151607	HOXD12
MA0906.1	0.00141256	0.462059	0.561	0.484	0.894153	HOXC12
MA0785.1	0.902071	0.460143	0.539	0.486	1	POU2F1
MA1493.1	0.0151679	0.459609	0.55	0.487	1	HES6
MA0672.1	0.00533701	0.452468	0.6	0.478	1	NKX2-3
MA1573.1	0.000190753	0.451307	0.639	0.485	0.120746	THAP11
MA0693.2	0.0014847	0.450359	0.65	0.481	0.939816	VDR
MA0259.1	1.66327e-05	0.449693	0.639	0.485	0.0105285	ARNT::HIF1A
MA0613.1	1.6869e-05	0.44482	0.661	0.483	0.0106781	FOXG1
MA1654.1	1.43033e-10	0.444798	0.789	0.507	9.05401e-08	ZNF16
MA1587.1	0.170392	0.443518	0.544	0.471	1	ZNF135
MA1108.2	1.24941e-05	0.442769	0.672	0.486	0.00790874	MXI1
MA1512.1	7.9118e-06	0.439722	0.622	0.485	0.00500817	KLF11
MA1471.1	6.29854e-05	0.438514	0.628	0.492	0.0398698	BARX2
MA0113.3	4.95049e-05	0.436641	0.633	0.483	0.0313366	NR3C1
MA1498.1	7.34679e-07	0.435224	0.689	0.484	0.000465052	HOXA7
MA1502.1	7.34679e-07	0.435224	0.689	0.484	0.000465052	HOXB8
MA0910.2	7.34679e-07	0.435224	0.689	0.484	0.000465052	HOXD8
MA0047.3	0.00099138	0.431988	0.644	0.49	0.627544	FOXA2
MA0155.1	3.74837e-06	0.430975	0.728	0.472	0.00237272	INSM1
MA0673.1	0.0934037	0.428052	0.589	0.481	1	NKX2-8
MA1633.1	6.14334e-44	0.422389	0.967	0.494	3.88873e-41	BACH1
MA1104.2	0.165215	0.418013	0.572	0.489	1	GATA6
MA0143.4	1.97612e-06	0.417525	0.694	0.475	0.00125088	SOX2
MA0485.2	0.00623786	0.414817	0.572	0.489	1	HOXC9
MA0468.1	2.24337e-05	0.413204	0.711	0.484	0.0142006	DUX4
MA0905.1	0.042811	0.409447	0.55	0.488	1	HOXC10
MA0752.1	0.000319406	0.409035	0.617	0.484	0.202184	ZNF410
MA1636.1	1.18853e-06	0.40614	0.767	0.494	0.000752337	CEBPG(var.2)
MA0780.1	0.00467492	0.404634	0.589	0.483	1	PAX3
MA1581.1	2.32105e-07	0.404245	0.694	0.491	0.000146922	ZBTB6
MA1479.1	0.000605076	0.398898	0.639	0.482	0.383013	DMRTC2
MA1472.1	2.67834e-06	0.398081	0.75	0.493	0.00169539	BHLHA15(var.2)
MA1563.1	2.5769e-05	0.397411	0.667	0.492	0.0163117	SOX18
MA0688.1	6.96698e-05	0.396953	0.578	0.495	0.044101	TBX2
MA0730.1	7.98199e-06	0.396834	0.7	0.473	0.0050526	RARA(var.2)
MA0770.1	2.06644e-06	0.394944	0.7	0.467	0.00130806	HSF2
MA0746.2	0.000685531	0.389196	0.578	0.479	0.433941	SP3
MA1107.2	5.66316e-08	0.385885	0.711	0.484	3.58478e-05	KLF9
MA1533.1	0.00185918	0.380641	0.622	0.482	1	NR1I2
MA0771.1	4.34734e-06	0.379117	0.728	0.474	0.00275187	HSF4
MA0669.1	0.00194651	0.373285	0.644	0.477	1	NEUROG2
MA1641.1	3.08037e-05	0.372808	0.706	0.487	0.0194987	MYF5
MA0767.1	0.0272078	0.372436	0.567	0.486	1	GCM2
MA0852.2	0.00219248	0.369595	0.6	0.486	1	FOXK1
MA0595.1	6.28556e-06	0.364555	0.706	0.489	0.00397876	SREBF1
MA1120.1	1.74828e-07	0.364244	0.722	0.49	0.000110666	SOX13
MA1657.1	0.161905	0.360939	0.572	0.478	1	ZNF652
MA0766.2	7.45031e-05	0.358048	0.656	0.486	0.0471604	GATA5
MA0152.1	3.35521e-07	0.353136	0.728	0.475	0.000212385	NFATC2
MA1683.1	0.00235724	0.349612	0.617	0.487	1	FOXA3
MA1560.1	0.0491768	0.348434	0.572	0.482	1	SOHLH2
MA0690.1	1.66502e-05	0.348236	0.65	0.493	0.0105396	TBX21
MA0088.2	0.00951592	0.33845	0.6	0.485	1	ZNF143
MA1509.1	0.577456	0.335666	0.522	0.489	1	IRF6
MA0863.1	0.00886715	0.331498	0.606	0.489	1	MTF1
MA0697.1	0.0273678	0.331195	0.633	0.475	1	ZIC3
MA0105.4	4.72881e-05	0.329519	0.717	0.471	0.0299333	NFKB1
MA0481.3	0.0201256	0.328113	0.594	0.489	1	FOXP1
MA0800.1	0.00122512	0.321167	0.583	0.492	0.7755	EOMES
MA0891.1	7.63384e-06	0.321052	0.7	0.49	0.00483222	GSC2
MA0084.1	0.0111448	0.320839	0.617	0.484	1	SRY
MA1487.1	3.42094e-05	0.320658	0.689	0.491	0.0216545	FOXE1
MA0884.1	0.000153391	0.311834	0.689	0.488	0.0970963	DUXA
MA1553.1	0.00980052	0.310432	0.611	0.486	1	RARG(var.3)
MA0139.1	0.0220834	0.307439	0.433	0.473	1	CTCF
MA0091.1	0.0061081	0.306508	0.639	0.471	1	TAL1::TCF3
MA1646.1	4.8381e-05	0.306438	0.7	0.485	0.0306251	OSR2
MA0039.4	1.60568e-06	0.297987	0.683	0.49	0.0010164	KLF4
MA1103.2	0.087198	0.296968	0.528	0.486	1	FOXK2
MA0066.1	8.84347e-06	0.295318	0.7	0.482	0.00559791	PPARG
MA0868.2	4.40856e-06	0.288582	0.706	0.478	0.00279062	SOX8
MA1596.1	0.845756	0.287262	0.456	0.483	1	ZNF460
MA1580.1	0.00424236	0.285006	0.622	0.496	1	ZBTB32
MA0009.2	0.000332899	0.280788	0.639	0.501	0.210725	TBXT
MA1478.1	0.0471209	0.27986	0.561	0.479	1	DMRTA2
MA0866.1	0.000192501	0.279507	0.661	0.495	0.121853	SOX21
MA0140.2	0.0413998	0.274341	0.561	0.488	1	GATA1::TAL1
MA1143.1	0.492169	0.273765	0.483	0.486	1	FOSL1::JUND(var.2)
MA0667.1	0.282459	0.267513	0.561	0.475	1	MYF6
MA1589.1	0.000630156	0.265978	0.667	0.477	0.398888	ZNF140
MA1109.1	0.00295559	0.264617	0.661	0.473	1	NEUROD1
MA0685.1	0.707718	0.264457	0.467	0.488	1	SP4
MA0646.1	0.0766884	0.26143	0.6	0.489	1	GCM1
MA1576.1	0.000219178	0.25981	0.678	0.472	0.13874	THRB(var.3)
MA0042.2	0.0519696	0.256968	0.594	0.485	1	FOXI1
MA0033.2	0.0519696	0.256968	0.594	0.485	1	FOXL1
MA0848.1	0.0519696	0.256968	0.594	0.485	1	FOXO4
MA0849.1	0.0519696	0.256968	0.594	0.485	1	FOXO6
MA0850.1	0.0519696	0.256968	0.594	0.485	1	FOXP3
MA1123.2	0.0008431	0.254243	0.65	0.473	0.533683	TWIST1
MA0657.1	0.00140248	0.249053	0.611	0.493	0.887772	KLF13
MA0031.1	0.0254075	0.248496	0.561	0.485	1	FOXD1
MA0157.2	0.0254075	0.248496	0.561	0.485	1	FOXO3
MA0593.1	0.0387862	0.245373	0.589	0.48	1	FOXP2
MA1548.1	0.104667	0.245238	0.606	0.477	1	PLAGL2
MA0740.1	0.891512	0.240138	0.483	0.494	1	KLF14
MA0727.1	0.0188304	0.237083	0.583	0.48	1	NR3C2
MA0025.2	0.000102998	0.234261	0.694	0.479	0.0651976	NFIL3
MA0775.1	0.012749	0.232162	0.611	0.488	1	MEIS3
MA1467.1	0.000282959	0.227463	0.661	0.483	0.179113	ATOH1(var.2)
MA0696.1	0.259432	0.222927	0.578	0.476	1	ZIC1
MA0639.1	0.14	0.22182	0.55	0.474	1	DBP
MA1552.1	0.261547	0.216943	0.55	0.49	1	RARB(var.3)
MA0665.1	0.0344052	0.215434	0.606	0.485	1	MSC
MA0030.1	0.00287821	0.213811	0.639	0.49	1	FOXF2
MA0796.1	0.0700804	0.213078	0.589	0.497	1	TGIF1
MA1655.1	2.8256e-05	0.209904	0.722	0.494	0.0178861	ZNF341
MA0797.1	0.18618	0.20747	0.594	0.493	1	TGIF2
MA0114.4	0.0431379	0.207199	0.611	0.47	1	HNF4A
MA0486.2	0.000127914	0.204264	0.694	0.467	0.0809696	HSF1
MA1468.1	0.0190755	0.202384	0.611	0.469	1	ATOH7
MA0681.2	0.0915389	0.199162	0.594	0.473	1	PHOX2B
MA0680.1	0.00305967	0.197482	0.628	0.483	1	PAX7
MA0783.1	0.00967514	0.197387	0.622	0.495	1	PKNOX2
MA1638.1	0.000166457	0.195565	0.683	0.474	0.105367	HAND2
MA0479.1	0.0114979	0.19537	0.633	0.484	1	FOXH1
MA0867.2	0.000155843	0.194563	0.717	0.486	0.0986485	SOX4
MA1562.1	7.48247e-05	0.191506	0.7	0.486	0.047364	SOX14
MA0787.1	0.682285	0.184834	0.489	0.483	1	POU3F2
MA0482.2	0.111234	0.178538	0.567	0.483	1	GATA4
MA0833.2	0.000445937	0.175371	0.656	0.476	0.282278	ATF4
MA0035.4	0.173643	0.174383	0.578	0.48	1	GATA1
MA1571.1	0.144215	0.173008	0.55	0.49	1	TGIF2LX
MA0908.1	0.547446	0.169415	0.5	0.482	1	HOXD11
MA0069.1	0.0902452	0.165532	0.561	0.489	1	PAX6
MA0784.1	0.353156	0.162523	0.594	0.488	1	POU1F1
MA0724.1	0.0132599	0.161572	0.578	0.491	1	VENTX
MA1494.1	0.0707027	0.155773	0.644	0.475	1	HNF4A(var.2)
MA0037.3	0.19276	0.155567	0.561	0.48	1	GATA3
MA1470.1	0.29948	0.1537	0.461	0.488	1	BACH2(var.2)
MA1480.1	0.0129137	0.153369	0.606	0.487	1	DPRX
MA1561.1	0.0526914	0.152869	0.567	0.478	1	SOX12
MA1149.1	0.00516447	0.15174	0.672	0.469	1	RARA::RXRG
MA0070.1	0.02234	0.149361	0.6	0.497	1	PBX1
MA1597.1	8.77489e-05	0.146578	0.722	0.49	0.055545	ZNF528
MA0148.4	0.0139675	0.142517	0.617	0.487	1	FOXA1
MA1147.1	0.364991	0.139716	0.561	0.468	1	NR4A2::RXRA
MA0733.1	0.624289	0.13112	0.522	0.455	1	EGR4
MA0747.1	0.172374	0.129666	0.578	0.481	1	SP8
MA1489.1	0.42724	0.124846	0.522	0.484	1	FOXN3
MA0599.1	0.0274276	0.123685	0.583	0.485	1	KLF5
MA1575.1	0.00180452	0.11969	0.683	0.473	1	THRB(var.2)
MA1534.1	0.75447	0.118233	0.561	0.475	1	NR1I3
MA0877.2	0.913984	0.116404	0.511	0.484	1	BARHL1
MA0637.1	0.658207	0.112454	0.511	0.486	1	CENPB
MA1602.1	0.00564469	0.0977551	0.611	0.483	1	ZSCAN29
MA1485.1	0.158283	0.0977371	0.589	0.491	1	FERD3L
MA1531.1	0.0125048	0.0975261	0.65	0.48	1	NR1D1
MA1555.1	0.857172	0.096973	0.528	0.479	1	RXRB(var.2)
MA0258.2	0.00380771	0.0906932	0.633	0.471	1	ESR2
MA0788.1	0.314825	0.0887846	0.494	0.489	1	POU3F3
MA0804.1	0.190677	0.0855836	0.533	0.488	1	TBX19
MA0502.2	0.0405419	0.0839225	0.556	0.5	1	NFYB
MA1642.1	0.00874725	0.0837875	0.667	0.471	1	NEUROG2(var.2)
MA0843.1	0.670474	0.075309	0.506	0.481	1	TEF
MA0469.3	0.184696	0.0737471	0.522	0.494	1	E2F3
MA0822.1	0.239124	0.0695686	0.511	0.478	1	HES7
MA0144.2	0.000179739	0.0594778	0.711	0.489	0.113775	STAT3
MA0635.1	0.23713	0.0546908	0.522	0.488	1	BARHL2
MA0819.1	0.589611	0.0528535	0.567	0.484	1	CLOCK
MA0751.1	0.587996	0.0519788	0.5	0.482	1	ZIC4
MA0782.2	0.142121	0.0480763	0.567	0.486	1	PKNOX1
MA1524.1	0.934065	0.0422997	0.544	0.48	1	MSGN1
MA1572.1	0.517536	0.0415003	0.539	0.495	1	TGIF2LY
MA0509.2	0.786135	0.0412895	0.539	0.494	1	RFX1
MA1122.1	0.836286	0.0373178	0.489	0.466	1	TFDP1
MA0659.2	0.101014	0.036364	0.578	0.459	1	MAFG
MA0711.1	0.551232	0.0271343	0.55	0.486	1	OTX1
MA0528.2	0.0144762	0.0267337	0.678	0.479	1	ZNF263
MA0895.1	0.986498	0.0242938	0.5	0.481	1	HMBOX1
MA0753.2	0.944117	0.0233242	0.55	0.468	1	ZNF740
MA0821.1	0.597082	0.0199885	0.517	0.473	1	HES5
MA1539.1	0.0352153	0.0155622	0.622	0.469	1	NR2F6(var.3)
MA0737.1	0.194481	0.0109701	0.65	0.477	1	GLIS3
MA1546.1	0.345747	0.00738512	0.556	0.483	1	PAX3(var.2)
MA1594.1	0.579057	0.00624906	0.561	0.477	1	ZNF382
MA0516.2	0.0264714	0.00275927	0.417	0.487	1	SP2
MA0758.1	0.883987	0.000832813	0.533	0.479	1	E2F7
MA0736.1	0.90408	-0.00375025	0.528	0.467	1	GLIS2
MA0024.3	0.406152	-0.00959086	0.467	0.487	1	E2F1
MA0470.2	0.685346	-0.0096738	0.511	0.493	1	E2F4
MA1584.1	0.156713	-0.0156851	0.522	0.479	1	ZIC5
MA1556.1	0.933038	-0.0179114	0.539	0.478	1	RXRG(var.2)
MA0691.1	0.0297728	-0.0249266	0.611	0.483	1	TFAP4
MA1514.1	0.769215	-0.0250729	0.506	0.48	1	KLF17
MA1592.1	0.216239	-0.0366226	0.622	0.474	1	ZNF274
MA1645.1	0.168342	-0.0403521	0.567	0.485	1	NKX2-2
MA1578.1	0.675438	-0.0407228	0.517	0.463	1	VEZF1
MA1593.1	0.0512511	-0.0440922	0.606	0.475	1	ZNF317
MA0074.1	0.482248	-0.0446235	0.522	0.481	1	RXRA::VDR
MA0798.2	0.453738	-0.0461757	0.511	0.489	1	RFX3
MA0102.4	4.68415e-08	-0.0483793	0.8	0.497	2.96507e-05	CEBPA
MA1152.1	0.930665	-0.049036	0.467	0.469	1	SOX15
MA0789.1	0.295542	-0.0550089	0.472	0.493	1	POU3F4
MA0484.2	0.0946042	-0.0606802	0.639	0.469	1	HNF4G
MA0757.1	0.736858	-0.0729312	0.511	0.48	1	ONECUT3
MA1522.1	0.750142	-0.0757069	0.528	0.466	1	MAZ
MA0466.2	0.000951779	-0.0770232	0.639	0.474	0.602476	CEBPB
MA0163.1	0.919035	-0.0788996	0.544	0.451	1	PLAG1
MA0498.2	0.199448	-0.0841591	0.494	0.487	1	MEIS1
MA0507.1	0.0696994	-0.0852703	0.45	0.482	1	POU2F2
MA0472.2	0.000455292	-0.0878755	0.383	0.466	0.2882	EGR2
MA0442.2	0.883763	-0.0917623	0.556	0.47	1	SOX10
MA0100.3	0.518984	-0.0922166	0.489	0.483	1	MYB
MA0769.2	0.292515	-0.093363	0.456	0.488	1	TCF7
MA1564.1	0.00786558	-0.0952971	0.433	0.491	1	SP9
MA0471.2	0.0982839	-0.102663	0.506	0.451	1	E2F6
MA0792.1	0.0602097	-0.105184	0.444	0.484	1	POU5F1B
MA0131.2	0.00395862	-0.106492	0.383	0.481	1	HINFP
MA1532.1	0.62966	-0.114908	0.544	0.477	1	NR1D2
MA0508.3	0.514822	-0.12912	0.528	0.466	1	PRDM1
MA0837.1	0.0228362	-0.129787	0.583	0.462	1	CEBPE
MA0057.1	0.78682	-0.132251	0.572	0.455	1	MZF1(var.2)
MA0095.2	0.0166793	-0.135421	0.394	0.492	1	YY1
MA1150.1	0.347965	-0.138086	0.589	0.472	1	RORB
MA1115.1	0.0143435	-0.142086	0.428	0.482	1	POU5F1
MA0504.1	0.367317	-0.15428	0.5	0.459	1	NR2C2
MA1523.1	0.663934	-0.157867	0.489	0.479	1	MSANTD3
MA0495.3	0.671664	-0.167939	0.55	0.467	1	MAFF
MA0492.1	0.483492	-0.175992	0.533	0.462	1	JUND(var.2)
MA1421.1	0.239306	-0.176232	0.478	0.484	1	TCF7L1
MA0777.1	0.0128407	-0.176879	0.439	0.49	1	MYBL2
MA0147.3	0.0688244	-0.189864	0.511	0.465	1	MYC
MA1127.1	0.0185114	-0.198559	0.45	0.481	1	FOSB::JUN
MA0756.1	0.264993	-0.200729	0.444	0.482	1	ONECUT2
MA0828.1	0.0219638	-0.204919	0.461	0.485	1	SREBF2(var.2)
MA1542.1	0.350719	-0.205712	0.517	0.491	1	OSR1
MA1651.1	0.0157109	-0.208322	0.456	0.49	1	ZFP42
MA1538.1	0.172405	-0.209542	0.606	0.461	1	NR2F1(var.3)
MA0594.2	0.711131	-0.21529	0.506	0.485	1	HOXA9
MA0842.2	0.64235	-0.217524	0.572	0.479	1	NRL
MA0649.1	0.00565656	-0.219967	0.422	0.471	1	HEY2
MA0794.1	0.0289374	-0.221111	0.422	0.487	1	PROX1
MA1550.1	0.682257	-0.222901	0.544	0.461	1	PPARD
MA0741.1	0.000496145	-0.223177	0.428	0.475	0.31406	KLF16
MA0734.2	0.413149	-0.226311	0.528	0.468	1	GLI2
MA0729.1	0.724019	-0.226465	0.578	0.462	1	RARA
MA1154.1	0.332801	-0.227121	0.611	0.468	1	ZNF282
MA0660.1	0.0213477	-0.232281	0.4	0.465	1	MEF2B
MA1570.1	0.393442	-0.23415	0.472	0.46	1	TFAP4(var.2)
MA0823.1	0.0231785	-0.23985	0.428	0.468	1	HEY1
MA1136.1	0.0470534	-0.250281	0.456	0.475	1	FOSB::JUNB(var.2)
MA0627.2	0.000820975	-0.253591	0.417	0.486	0.519677	POU2F3
MA0063.2	0.0398342	-0.258666	0.456	0.477	1	NKX2-5
MA0735.1	0.204721	-0.269883	0.494	0.483	1	GLIS1
MA0052.4	2.54861e-05	-0.272834	0.394	0.467	0.0161327	MEF2A
MA0773.1	0.0113853	-0.274316	0.422	0.458	1	MEF2D
MA0864.2	0.00511404	-0.27478	0.433	0.495	1	E2F2
MA0774.1	0.098395	-0.283579	0.472	0.481	1	MEIS2
MA1644.1	0.0466927	-0.287229	0.417	0.507	1	NFYC
MA1126.1	0.261777	-0.288036	0.511	0.46	1	FOS::JUN(var.2)
MA0694.1	2.0588e-05	-0.291761	0.422	0.479	0.0130322	ZBTB7B
MA1148.1	0.324996	-0.293168	0.594	0.462	1	PPARA::RXRA
MA0836.2	2.74384e-08	-0.298801	0.817	0.498	1.73685e-05	CEBPD
MA0865.1	0.0177326	-0.301391	0.461	0.468	1	E2F8
MA0839.1	0.031552	-0.30175	0.444	0.482	1	CREB3L1
MA0083.3	0.525581	-0.303567	0.517	0.466	1	SRF
MA1146.1	0.884017	-0.304408	0.528	0.467	1	NR1H4::RXRA
MA0162.4	3.76971e-06	-0.308844	0.322	0.468	0.00238622	EGR1
MA1131.1	0.0170447	-0.313814	0.45	0.47	1	FOSL2::JUN(var.2)
MA0779.1	0.149318	-0.316463	0.444	0.48	1	PAX1
MA1650.1	4.24844e-05	-0.318349	0.367	0.467	0.0268926	ZBTB14
MA0625.1	0.198178	-0.319507	0.5	0.454	1	NFATC3
MA1466.1	0.103065	-0.323181	0.478	0.488	1	ATF6
MA0732.1	8.10289e-06	-0.32386	0.383	0.467	0.00512913	EGR3
MA0112.3	0.996027	-0.324418	0.511	0.463	1	ESR1
MA0523.1	0.00204976	-0.335583	0.372	0.495	1	TCF7L2
MA0104.4	0.182754	-0.335811	0.567	0.472	1	MYCN
MA1474.1	9.90698e-05	-0.337575	0.372	0.48	0.0627112	CREB3L4
MA0056.2	0.992618	-0.346688	0.55	0.464	1	MZF1
MA1574.1	0.604321	-0.347497	0.522	0.45	1	THRB
MA1140.2	3.80229e-05	-0.358877	0.389	0.479	0.0240685	JUNB(var.2)
MA0527.1	0.00312626	-0.359088	0.394	0.483	1	ZBTB33
MA0838.1	0.0589566	-0.359665	0.572	0.459	1	CEBPG
MA0825.1	0.00707794	-0.359761	0.456	0.475	1	MNT
MA0768.1	0.0181423	-0.361632	0.439	0.484	1	LEF1
MA1129.1	0.000504161	-0.363751	0.406	0.482	0.319134	FOSL1::JUN(var.2)
MA0754.1	0.0292793	-0.371158	0.456	0.489	1	CUX1
MA0781.1	0.0168282	-0.373358	0.45	0.485	1	PAX9
MA1151.1	0.0403114	-0.389765	0.489	0.475	1	RORC
MA0072.1	0.00223166	-0.391291	0.417	0.474	1	RORA(var.2)
MA1102.2	2.56743e-06	-0.39978	0.372	0.47	0.00162518	CTCFL
MA0632.2	0.000131542	-0.402126	0.417	0.471	0.0832662	TCFL5
MA1525.1	0.0380668	-0.405286	0.467	0.461	1	NFATC4
MA0799.1	0.00581664	-0.409442	0.444	0.494	1	RFX4
MA0059.1	0.0146538	-0.421592	0.478	0.47	1	MAX::MYC
MA0014.3	0.00035584	-0.427556	0.4	0.471	0.225246	PAX5
MA0616.2	0.000162255	-0.437522	0.406	0.474	0.102708	HES2
MA0755.1	0.000697904	-0.4428	0.383	0.493	0.441773	CUX2
MA0605.2	0.000988131	-0.446308	0.389	0.472	0.625487	ATF3
MA0776.1	0.00017943	-0.449252	0.422	0.49	0.113579	MYBL1
MA0060.3	0.0028861	-0.452113	0.4	0.515	1	NFYA
MA1145.1	0.00455802	-0.452926	0.422	0.463	1	FOSL2::JUND(var.2)
MA1541.1	0.155688	-0.457007	0.467	0.457	1	NR6A1
MA1491.1	0.015107	-0.458861	0.489	0.461	1	GLI3
MA0488.1	0.832413	-0.461217	0.572	0.458	1	JUN
MA0856.1	0.0366434	-0.474831	0.45	0.455	1	RXRG
MA0844.1	0.000282568	-0.475365	0.417	0.482	0.178866	XBP1
MA1099.2	3.0293e-09	-0.475666	0.344	0.48	1.91755e-06	HES1
MA1513.1	1.35162e-10	-0.475713	0.311	0.482	8.55573e-08	KLF15
MA0695.1	1.27078e-07	-0.482356	0.344	0.488	8.04404e-05	ZBTB7C
MA0058.3	5.48138e-05	-0.490952	0.389	0.472	0.0346971	MAX
MA0834.1	0.000144101	-0.491863	0.4	0.48	0.0912159	ATF7
MA0464.2	0.000101895	-0.49664	0.383	0.475	0.0644994	BHLHE40
MA0609.2	1.15938e-06	-0.498017	0.372	0.472	0.00073389	CREM
MA0149.1	0.815744	-0.501217	0.511	0.441	1	EWSR1-FLI1
MA0137.3	0.206335	-0.501802	0.617	0.457	1	STAT1
MA1554.1	0.000196042	-0.502168	0.367	0.508	0.124095	RFX7
MA0073.1	1.20033e-07	-0.506772	0.333	0.47	7.59806e-05	RREB1
MA0749.1	0.000405918	-0.513806	0.394	0.491	0.256946	ZBED1
MA0497.1	3.84346e-05	-0.514208	0.406	0.456	0.0243291	MEF2C
MA1125.1	6.34524e-12	-0.515577	0.317	0.485	4.01654e-09	ZNF384
MA1653.1	3.48658e-11	-0.517112	0.322	0.454	2.20701e-08	ZNF148
MA0656.1	1.6616e-05	-0.523773	0.35	0.473	0.010518	JDP2(var.2)
MA1535.1	0.759301	-0.552187	0.539	0.451	1	NR2C1
MA1537.1	0.277536	-0.557413	0.533	0.458	1	NR2F1(var.2)
MA0510.2	2.29404e-05	-0.565132	0.367	0.498	0.0145213	RFX5
MA0071.1	0.0028856	-0.588133	0.433	0.459	1	RORA
MA0600.2	0.000398504	-0.591209	0.406	0.495	0.252253	RFX2
MA1139.1	1.92455e-05	-0.591332	0.344	0.475	0.0121824	FOSL2::JUNB(var.2)
MA0855.1	0.0413127	-0.59152	0.417	0.457	1	RXRB
MA0101.1	0.000226569	-0.606034	0.711	0.463	0.143418	REL
MA1133.1	6.56882e-07	-0.616783	0.344	0.473	0.000415807	JUN::JUNB(var.2)
MA1632.1	0.077435	-0.650646	0.489	0.444	1	ATF2
MA0638.1	6.24081e-07	-0.653821	0.378	0.488	0.000395043	CREB3
MA1464.1	1.12444e-06	-0.654327	0.344	0.457	0.000711771	ARNT2
MA0862.1	6.55734e-07	-0.677425	0.344	0.493	0.00041508	GMEB2
MA1540.1	0.5293	-0.690859	0.556	0.44	1	NR5A1
MA1110.1	0.841159	-0.692618	0.544	0.461	1	NR1H4
MA0663.1	1.36392e-07	-0.702559	0.344	0.467	8.63363e-05	MLX
MA0107.1	8.92426e-05	-0.720169	0.717	0.458	0.0564905	RELA
MA0115.1	0.00360772	-0.730841	0.406	0.452	1	NR1H2::RXRA
MA0664.1	3.83325e-08	-0.740537	0.383	0.461	2.42645e-05	MLXIPL
MA0636.1	3.29099e-10	-0.789226	0.3	0.467	2.08319e-07	BHLHE41
MA0871.2	4.08798e-09	-0.850666	0.317	0.45	2.58769e-06	TFEC
MA1475.1	4.4372e-11	-0.873552	0.306	0.474	2.80875e-08	CREB3L4(var.2)
MA0506.1	4.97952e-14	-0.920292	0.261	0.468	3.15203e-11	NRF1
MA0592.3	0.0214351	-0.92443	0.4	0.439	1	ESRRA
MA0018.4	0.00228807	-0.979732	0.417	0.442	1	CREB1
MA1545.1	1.20628e-10	-1.02922	0.25	0.488	7.63573e-08	OVOL2
MA1647.1	0.00847461	-1.03703	0.417	0.431	1	PRDM4
MA0141.3	0.00697246	-1.15881	0.389	0.433	1	ESRRB
MA1536.1	0.463781	-1.16838	0.5	0.443	1	NR2C2(var.2)
MA1420.1	4.21754e-16	-1.23226	0.256	0.482	2.6697e-13	IRF5
MA1544.1	5.26128e-13	-1.28316	0.228	0.486	3.33039e-10	OVOL1
MA0748.2	1.15403e-12	-1.29774	0.267	0.486	7.305e-10	YY2
MA0017.2	0.000591827	-1.38938	0.394	0.428	0.374626	NR2F1
MA0772.1	5.05989e-18	-1.52847	0.228	0.464	3.20291e-15	IRF7
MA0686.1	6.73011e-18	-1.60163	0.206	0.493	4.26016e-15	SPDEF
MA0051.1	1.18325e-16	-1.62565	0.25	0.45	7.48998e-14	IRF2
MA0692.1	3.07384e-12	-1.64566	0.272	0.429	1.94574e-09	TFEB
MA1652.1	0.000188367	-1.88642	0.339	0.376	0.119236	ZKSCAN5
MA0831.2	3.71914e-12	-1.88655	0.233	0.43	2.35421e-09	TFE3
MA0684.2	1.51782e-30	-1.88863	0.144	0.48	9.60783e-28	RUNX3
MA0620.3	1.78594e-12	-1.89931	0.239	0.432	1.1305e-09	MITF
MA0093.3	0.0010065	-1.91775	0.378	0.424	0.637115	USF1
MA0160.1	1.18191e-11	-2.19656	0.283	0.424	7.48149e-09	NR4A2
MA0511.2	8.94197e-30	-2.24668	0.128	0.483	5.66027e-27	RUNX2
MA0526.3	0.000152021	-2.34934	0.361	0.417	0.0962295	USF2
MA0652.1	4.34639e-24	-2.41362	0.133	0.46	2.75126e-21	IRF8
MA0028.2	8.35385e-32	-2.55178	0.094	0.49	5.28799e-29	ELK1
MA1419.1	2.16925e-26	-2.56346	0.122	0.478	1.37313e-23	IRF4
MA0653.1	2.54073e-21	-2.57839	0.217	0.469	1.60828e-18	IRF9
MA0050.2	2.39123e-22	-2.57981	0.189	0.403	1.51365e-19	IRF1
MA0759.1	1.74201e-29	-2.63962	0.083	0.488	1.10269e-26	ELK3
MA1112.2	1.01141e-23	-2.70767	0.183	0.43	6.40224e-21	NR4A1
MA1418.1	1.67526e-20	-2.9692	0.2	0.413	1.06044e-17	IRF3
MA0763.1	6.81446e-37	-2.97214	0.061	0.5	4.31355e-34	ETV3
MA1111.1	5.28229e-15	-3.07332	0.239	0.403	3.34369e-12	NR2F2
MA0750.2	3.41808e-42	-3.0935	0.033	0.507	2.16365e-39	ZBTB7A
MA1483.1	1.24881e-40	-3.11976	0.044	0.501	7.905e-38	ELF2
MA0156.2	1.62026e-38	-3.41159	0.039	0.502	1.02563e-35	FEV
MA1484.1	5.49082e-46	-3.66081	0.033	0.502	3.47569e-43	ETS2
MA0475.2	7.62603e-42	-3.69167	0.028	0.516	4.82728e-39	FLI1
MA0517.1	3.86428e-24	-3.78903	0.156	0.379	2.44609e-21	STAT1::STAT2
MA0641.1	2.78427e-42	-3.83052	0.022	0.495	1.76244e-39	ELF4
MA0098.3	2.41004e-43	-3.86409	0.017	0.504	1.52556e-40	ETS1
MA0076.2	7.4171e-47	-3.91664	0.028	0.518	4.69502e-44	ELK4
MA0474.2	5.58838e-43	-4.01807	0.022	0.513	3.53744e-40	ERG
MA0762.1	2.24348e-49	-4.31182	0.022	0.503	1.42012e-46	ETV2
MA0760.1	1.29174e-46	-4.31728	0.028	0.511	8.17669e-44	ERF
MA0765.2	2.34651e-46	-4.33264	0	0.507	1.48534e-43	ETV5
MA0764.2	1.64322e-41	-5.78354	0.022	0.375	1.04016e-38	ETV4
MA0761.2	5.71808e-47	-6.64025	0.011	0.433	3.61954e-44	ETV1
MA0473.3	8.63696e-45	-7.31335	0.006	0.408	5.46719e-42	ELF1
MA1508.1	7.26549e-37	-7.63728	0.017	0.333	4.59906e-34	IKZF1
MA0136.2	1.31902e-49	-7.66942	0	0.419	8.34938e-47	ELF5
MA0062.3	1.62976e-48	-7.68893	0	0.423	1.03164e-45	GABPA
MA0645.1	1.23206e-51	-7.87977	0	0.468	7.79894e-49	ETV6
MA0640.2	1.24778e-42	-9.71238	0.006	0.359	7.89842e-40	ELF3
MA0080.5	4.6136e-31	-10.7559	0.022	0.259	2.92041e-28	SPI1
MA0598.3	9.66761e-45	-12.7448	0	0.363	6.1196e-42	EHF
MA0687.1	3.24047e-31	-12.8739	0.033	0.261	2.05122e-28	SPIC
MA0081.2	5.82179e-33	-13.2454	0.006	0.265	3.68519e-30	SPIB

## Sheet: NKT
	p_val	avg_log2FC	pct.1	pct.2	p_val_adj	gene
MA0057.1	0	-2.10022	0.162	0.635	0	MZF1(var.2)
MA0066.1	0	-2.35235	0.169	0.681	0	PPARG
MA0077.1	0	-2.19533	0.164	0.689	0	SOX9
MA0091.1	0	-2.11061	0.189	0.649	0	TAL1::TCF3
MA0101.1	0	-5.07604	0.082	0.705	0	REL
MA0107.1	0	-5.38851	0.073	0.702	0	RELA
MA0119.1	0	-4.14687	0.05	0.803	0	NFIC::TLX1
MA0130.1	0	-2.16793	0.098	0.736	0	ZNF354C
MA0149.1	0	-2.52055	0.081	0.66	0	EWSR1-FLI1
MA0138.2	0	-2.01306	0.161	0.706	0	REST
MA0152.1	0	-2.7084	0.084	0.723	0	NFATC2
MA0155.1	0	-1.81859	0.17	0.666	0	INSM1
MA0159.1	0	-2.53366	0.135	0.708	0	RARA::RXRA
MA0476.1	0	-11.7496	0.02	0.764	0	FOS
MA0478.1	0	-12.109	0.017	0.764	0	FOSL2
MA0488.1	0	-2.59792	0.166	0.639	0	JUN
MA0489.1	0	-12.6264	0.019	0.76	0	JUN(var.2)
MA0492.1	0	-2.35715	0.168	0.641	0	JUND(var.2)
MA0501.1	0	-5.8028	0.03	0.817	0	MAF::NFE2
MA0513.1	0	-2.3225	0.153	0.727	0	SMAD2::SMAD3::SMAD4
MA0076.2	0	2.08274	0.899	0.264	0	ELK4
MA0258.2	0	-2.51701	0.147	0.673	0	ESR2
MA0137.3	0	-3.25182	0.098	0.681	0	STAT1
MA0144.2	0	-3.40503	0.059	0.758	0	STAT3
MA0595.1	0	-2.03643	0.192	0.679	0	SREBF1
MA0596.1	0	-2.25811	0.169	0.685	0	SREBF2
MA0597.1	0	-2.43836	0.14	0.722	0	THAP1
MA0644.1	0	-2.02477	0.185	0.668	0	ESX1
MA0475.2	0	2.15366	0.883	0.269	0	FLI1
MA0647.1	0	-2.57314	0.187	0.669	0	GRHL1
MA0648.1	0	-2.11403	0.188	0.681	0	GSC
MA0486.2	0	-2.54067	0.139	0.676	0	HSF1
MA0655.1	0	-10.1503	0.019	0.753	0	JDP2
MA0670.1	0	-3.39937	0.1	0.747	0	NFIA
MA0671.1	0	-3.10971	0.113	0.743	0	NFIX
MA0048.2	0	-2.15481	0.161	0.709	0	NHLH1
MA0683.1	0	-1.88276	0.175	0.685	0	POU4F2
MA0691.1	0	-2.49106	0.154	0.687	0	TFAP4
MA0145.3	0	-2.407	0.162	0.689	0	TFCP2
MA0698.1	0	-2.55275	0.123	0.737	0	ZBTB18
MA0706.1	0	-2.17191	0.175	0.691	0	MEOX2
MA0132.2	0	-1.9935	0.2	0.665	0	PDX1
MA0714.1	0	-2.21347	0.156	0.701	0	PITX3
MA0718.1	0	-1.95469	0.206	0.671	0	RAX
MA0719.1	0	-2.31014	0.16	0.697	0	RHOXF1
MA0722.1	0	-2.0872	0.175	0.691	0	VAX1
MA0723.1	0	-2.0872	0.175	0.691	0	VAX2
MA0725.1	0	-2.16824	0.179	0.689	0	VSX1
MA0726.1	0	-2.01437	0.186	0.682	0	VSX2
MA0730.1	0	-2.10908	0.176	0.663	0	RARA(var.2)
MA0731.1	0	-2.66108	0.121	0.725	0	BCL6B
MA0738.1	0	-2.43715	0.14	0.718	0	HIC2
MA0759.1	0	2.05312	0.83	0.261	0	ELK3
MA0760.1	0	1.10158	0.866	0.272	0	ERF
MA0474.2	0	1.54884	0.866	0.275	0	ERG
MA0098.3	0	2.2343	0.874	0.256	0	ETS1
MA0762.1	0	0.892087	0.844	0.272	0	ETV2
MA0763.1	0	1.87192	0.831	0.278	0	ETV3
MA0156.2	0	2.22407	0.869	0.256	0	FEV
MA0770.1	0	-2.75855	0.115	0.691	0	HSF2
MA0771.1	0	-2.32824	0.164	0.673	0	HSF4
MA0790.1	0	-1.66054	0.21	0.67	0	POU4F1
MA0793.1	0	-2.0208	0.189	0.686	0	POU6F2
MA0808.1	0	-7.107	0.021	0.8	0	TEAD3
MA0810.1	0	-2.95427	0.086	0.755	0	TFAP2A(var.2)
MA0811.1	0	-3.75186	0.06	0.757	0	TFAP2B
MA0812.1	0	-3.20677	0.078	0.764	0	TFAP2B(var.2)
MA0813.1	0	-2.33348	0.118	0.741	0	TFAP2B(var.3)
MA0524.2	0	-3.64989	0.065	0.75	0	TFAP2C
MA0815.1	0	-2.3341	0.125	0.736	0	TFAP2C(var.3)
MA0466.2	0	-3.81779	0.088	0.713	0	CEBPB
MA0837.1	0	-4.10835	0.077	0.698	0	CEBPE
MA0838.1	0	-4.25161	0.081	0.691	0	CEBPG
MA0841.1	0	-10.0572	0.02	0.768	0	NFE2
MA0525.2	0	-7.13454	0.047	0.7	0	TP63
MA0106.3	0	-9.51725	0.031	0.715	0	TP53
MA0861.1	0	-9.67132	0.027	0.71	0	TP73
MA0872.1	0	-2.2649	0.126	0.74	0	TFAP2A(var.3)
MA0028.2	0	2.14233	0.83	0.265	0	ELK1
MA0882.1	0	-1.98794	0.193	0.678	0	DLX6
MA0884.1	0	-1.71254	0.202	0.67	0	DUXA
MA0886.1	0	-2.12693	0.196	0.68	0	EMX2
MA0891.1	0	-1.89545	0.201	0.674	0	GSC2
MA0892.1	0	-1.91438	0.2	0.671	0	GSX1
MA0899.1	0	-1.96404	0.172	0.691	0	HOXA10
MA0903.1	0	-2.43984	0.147	0.7	0	HOXB3
MA1109.1	0	-2.38917	0.151	0.676	0	NEUROD1
MA0161.2	0	-4.04476	0.053	0.783	0	NFIC
MA1114.1	0	-2.15542	0.171	0.689	0	PBX3
MA1116.1	0	-3.55095	0.051	0.832	0	RBPJ
MA1117.1	0	-3.12825	0.084	0.748	0	RELB
MA1119.1	0	-1.98928	0.184	0.682	0	SIX2
MA1120.1	0	-2.48235	0.135	0.714	0	SOX13
MA1121.1	0	-6.69957	0.023	0.805	0	TEAD2
MA0750.2	0	1.25982	0.849	0.276	0	ZBTB7A
MA1124.1	0	-2.66642	0.097	0.747	0	ZNF24
MA1154.1	0	-2.06353	0.175	0.65	0	ZNF282
MA1155.1	0	-2.18038	0.159	0.714	0	ZSCAN4
MA0099.3	0	-11.1942	0.019	0.76	0	FOS::JUN
MA1128.1	0	-11.3409	0.018	0.76	0	FOSL1::JUN
MA1130.1	0	-11.3593	0.018	0.757	0	FOSL2::JUN
MA1132.1	0	-9.42075	0.023	0.754	0	JUN::JUNB
MA1134.1	0	-11.1245	0.018	0.758	0	FOS::JUNB
MA1135.1	0	-11.1386	0.018	0.757	0	FOSB::JUNB
MA1137.1	0	-11.1288	0.021	0.756	0	FOSL1::JUNB
MA1138.1	0	-10.8226	0.019	0.757	0	FOSL2::JUNB
MA1141.1	0	-12.5902	0.019	0.765	0	FOS::JUND
MA1142.1	0	-10.9932	0.021	0.757	0	FOSL1::JUND
MA1144.1	0	-10.9195	0.019	0.753	0	FOSL2::JUND
MA1467.1	0	-2.71545	0.132	0.703	0	ATOH1(var.2)
MA1101.2	0	-10.0333	0.018	0.764	0	BACH2
MA1472.1	0	-2.80036	0.116	0.732	0	BHLHA15(var.2)
MA1473.1	0	-2.01871	0.171	0.686	0	CDX4
MA1476.1	0	-1.88417	0.197	0.675	0	DLX5
MA1481.1	0	-1.9935	0.2	0.665	0	DRGX
MA1483.1	0	1.28221	0.813	0.29	0	ELF2
MA1484.1	0	1.1826	0.83	0.28	0	ETS2
MA1487.1	0	-1.95307	0.184	0.686	0	FOXE1
MA1511.1	0	-1.61458	0.167	0.69	0	KLF10
MA1515.1	0	-1.43673	0.196	0.663	0	KLF2
MA1516.1	0	-1.87342	0.167	0.677	0	KLF3
MA1517.1	0	-1.8015	0.17	0.679	0	KLF6
MA1518.1	0	-2.01987	0.189	0.681	0	LHX1
MA1520.1	0	-2.69141	0.139	0.722	0	MAF
MA1521.1	0	-2.72719	0.132	0.726	0	MAFA
MA1527.1	0	-5.09215	0.039	0.816	0	NFIC(var.2)
MA1528.1	0	-4.85656	0.038	0.797	0	NFIX(var.2)
MA1529.1	0	-2.41261	0.133	0.726	0	NHLH2
MA1531.1	0	-2.13708	0.175	0.671	0	NR1D1
MA1533.1	0	-1.83526	0.202	0.656	0	NR1I2
MA1540.1	0	-3.03561	0.145	0.622	0	NR5A1
MA1547.1	0	-2.15708	0.176	0.683	0	PITX2
MA1562.1	0	-1.95956	0.192	0.674	0	SOX14
MA1563.1	0	-1.85918	0.195	0.68	0	SOX18
MA1569.1	0	-2.72192	0.1	0.749	0	TFAP2E
MA1573.1	0	-1.76751	0.192	0.669	0	THAP11
MA1575.1	0	-2.27922	0.166	0.669	0	THRB(var.2)
MA1576.1	0	-2.40554	0.147	0.677	0	THRB(var.3)
MA1579.1	0	-3.15612	0.073	0.781	0	ZBTB26
MA1581.1	0	-2.11194	0.147	0.708	0	ZBTB6
MA1588.1	0	-1.99374	0.177	0.668	0	ZNF136
MA1589.1	0	-2.12849	0.172	0.669	0	ZNF140
MA1593.1	0	-2.16131	0.186	0.654	0	ZNF317
MA1597.1	0	-3.02468	0.082	0.746	0	ZNF528
MA1599.1	0	-1.84466	0.151	0.714	0	ZNF682
MA1600.1	0	-2.51389	0.129	0.717	0	ZNF684
MA1601.1	0	-2.59685	0.102	0.741	0	ZNF75D
MA1100.2	0	-2.36831	0.144	0.718	0	ASCL1
MA0462.2	0	-10.9295	0.019	0.764	0	BATF::JUN
MA0463.2	0	-2.35393	0.146	0.71	0	BCL6
MA0878.2	0	-1.934	0.192	0.68	0	CDX1
MA0038.2	0	-3.00601	0.097	0.753	0	GFI1
MA0893.2	0	-2.06546	0.192	0.676	0	GSX2
MA0650.2	0	-2.05266	0.178	0.686	0	HOXA13
MA0902.2	0	-2.17651	0.174	0.677	0	HOXB2
MA0909.2	0	-1.88448	0.19	0.666	0	HOXD13
MA0912.2	0	-1.93929	0.205	0.678	0	HOXD3
MA0913.2	0	-2.04918	0.185	0.685	0	HOXD9
MA0682.2	0	-2.08759	0.18	0.692	0	PITX1
MA0867.2	0	-2.52059	0.117	0.719	0	SOX4
MA0868.2	0	-2.05661	0.158	0.682	0	SOX8
MA1633.1	0	-11.2958	0.022	0.802	0	BACH1
MA1634.1	0	-11.011	0.021	0.765	0	BATF
MA1635.1	0	-2.63114	0.113	0.745	0	BHLHE22(var.2)
MA1636.1	0	-3.74747	0.062	0.767	0	CEBPG(var.2)
MA1637.1	0	-3.21939	0.068	0.782	0	EBF3
MA1638.1	0	-2.27417	0.168	0.669	0	HAND2
MA1639.1	0	-2.69496	0.123	0.715	0	MEIS1(var.2)
MA1640.1	0	-2.36583	0.136	0.713	0	MEIS2(var.2)
MA1641.1	0	-2.85815	0.121	0.718	0	MYF5
MA1642.1	0	-2.3253	0.163	0.666	0	NEUROG2(var.2)
MA1643.1	0	-4.97235	0.037	0.813	0	NFIB
MA1646.1	0	-2.32836	0.137	0.704	0	OSR2
MA1649.1	0	-2.44618	0.126	0.722	0	ZBTB12
MA1654.1	0	-2.75778	0.096	0.768	0	ZNF16
MA1655.1	0	-2.61852	0.125	0.727	0	ZNF341
MA1656.1	0	-2.68864	0.106	0.757	0	ZNF449
MA0833.2	0	-2.88168	0.108	0.706	0	ATF4
MA0835.2	0	-10.6237	0.019	0.766	0	BATF3
MA0102.4	0	-4.78306	0.038	0.788	0	CEBPA
MA0836.2	0	-4.98352	0.04	0.789	0	CEBPD
MA0154.4	0	-3.54917	0.049	0.812	0	EBF1
MA0765.2	0	0.754134	0.86	0.268	0	ETV5
MA0477.2	0	-11.8159	0.017	0.759	0	FOSL1
MA1105.2	0	-3.25225	0.116	0.708	0	GRHL2
MA0043.3	0	-2.88882	0.104	0.726	0	HLF
MA0114.4	0	-2.61066	0.122	0.686	0	HNF4A
MA0484.2	0	-2.66729	0.12	0.686	0	HNF4G
MA0901.2	0	-1.67688	0.183	0.669	0	HOXB13
MA0490.2	0	-10.4531	0.02	0.755	0	JUNB
MA0491.2	0	-10.2496	0.021	0.757	0	JUND
MA0039.4	0	-1.18093	0.178	0.687	0	KLF4
MA1107.2	0	-1.42443	0.176	0.681	0	KLF9
MA0659.2	0	-2.23129	0.167	0.64	0	MAFG
MA0496.3	0	-5.43224	0.034	0.804	0	MAFK
MA1108.2	0	-2.70442	0.145	0.7	0	MXI1
MA0500.2	0	-2.30703	0.151	0.704	0	MYOG
MA0056.2	0	-2.26105	0.178	0.64	0	MZF1
MA0089.2	0	-7.1536	0.024	0.823	0	NFE2L1
MA0025.2	0	-2.38808	0.138	0.694	0	NFIL3
MA0712.2	0	-2.214	0.161	0.694	0	OTX2
MA1113.2	0	-2.48912	0.128	0.704	0	PBX2
MA0508.3	0	-2.09253	0.157	0.653	0	PRDM1
MA0143.4	0	-2.18385	0.146	0.684	0	SOX2
MA0090.3	0	-6.54666	0.022	0.808	0	TEAD1
MA0809.2	0	-6.90726	0.021	0.802	0	TEAD4
MA0003.4	0	-3.69129	0.052	0.758	0	TFAP2A
MA0814.2	0	-2.68287	0.082	0.753	0	TFAP2C(var.2)
MA1123.2	0	-2.38337	0.16	0.669	0	TWIST1
MA0748.2	0	1.70368	0.764	0.307	0	YY2
MA0528.2	0	-2.03039	0.106	0.713	0	ZNF263
MA0791.1	0	-1.6675	0.2	0.659	0	POU4F3
MA0875.1	0	-1.90665	0.206	0.657	0	BARX1
MA1549.1	0	-1.73858	0.217	0.663	0	POU6F1(var.2)
MA1592.1	0	-1.97817	0.193	0.65	0	ZNF274
MA0866.1	0	-1.73759	0.218	0.67	0	SOX21
MA0105.4	0	-2.09759	0.186	0.655	0	NFKB1
MA0153.2	0	-1.69845	0.215	0.667	0	HNF1B
MA1645.1	0	-1.76989	0.205	0.656	0	NKX2-2
MA0661.1	0	-1.96174	0.213	0.674	1.98143e-307	MEOX1
MA1149.1	0	-1.87593	0.19	0.646	3.77221e-306	RARA::RXRG
MA0599.1	6.81951e-307	-0.975345	0.21	0.654	4.31675e-304	KLF5
MA1501.1	1.00655e-303	-1.80244	0.211	0.661	6.37148e-301	HOXB7
MA0618.1	9.31661e-303	-1.83621	0.211	0.65	5.89741e-300	LBX1
MA1497.1	1.04427e-302	-1.9067	0.218	0.656	6.61022e-300	HOXA6
MA0894.1	2.11593e-302	-1.89193	0.209	0.654	1.33938e-299	HESX1
MA0113.3	2.40414e-302	-1.89622	0.198	0.662	1.52182e-299	NR3C1
MA1522.1	2.31526e-299	-1.37653	0.19	0.635	1.46556e-296	MAZ
MA1647.1	1.79705e-297	-2.60654	0.163	0.59	1.13753e-294	PRDM4
MA0468.1	1.02816e-296	-1.64836	0.21	0.659	6.50827e-294	DUX4
MA0700.2	6.6416e-296	-1.79708	0.22	0.648	4.20413e-293	LHX2
MA1499.1	7.90992e-295	-1.79499	0.209	0.663	5.00698e-292	HOXB4
MA1507.1	7.90992e-295	-1.79499	0.209	0.663	5.00698e-292	HOXD4
MA0665.1	6.4011e-293	-1.80325	0.211	0.656	4.0519e-290	MSC
MA0658.1	1.30463e-292	-1.93215	0.224	0.661	8.25834e-290	LHX6
MA0158.2	2.42223e-292	-1.72919	0.222	0.654	1.53327e-289	HOXA5
MA0027.2	7.47266e-292	-1.75649	0.222	0.647	4.7302e-289	EN1
MA0820.1	3.2267e-288	-2.40649	0.206	0.684	2.0425e-285	FIGLA
MA0729.1	1.12732e-287	-2.18213	0.194	0.628	7.13594e-285	RARA
MA0675.1	2.6945e-286	-1.88738	0.214	0.644	1.70562e-283	NKX6-2
MA0075.3	2.13535e-284	-1.84936	0.229	0.65	1.35167e-281	PRRX2
MA0707.1	1.11873e-283	-1.77253	0.224	0.65	7.08155e-281	MNX1
MA0778.1	1.72957e-283	-1.72512	0.215	0.647	1.09482e-280	NFKB2
MA1530.1	4.69267e-283	-1.61495	0.229	0.661	2.97046e-280	NKX6-3
MA0699.1	9.36246e-280	-1.80295	0.216	0.649	5.92644e-277	LBX2
MA0890.1	3.16865e-279	-1.83862	0.225	0.654	2.00575e-276	GBX2
MA0889.1	5.94675e-279	-1.74558	0.23	0.654	3.76429e-276	GBX1
MA0442.2	8.50931e-279	-1.67569	0.208	0.631	5.38639e-276	SOX10
MA0888.1	1.1093e-277	-1.67024	0.231	0.655	7.02187e-275	EVX2
MA0743.2	5.31243e-277	-2.00094	0.223	0.669	3.36277e-274	SCRT1
MA1495.1	6.16725e-277	-1.65658	0.233	0.654	3.90387e-274	HOXA1
MA0900.2	6.16725e-277	-1.65658	0.233	0.654	3.90387e-274	HOXA2
MA1553.1	2.81209e-275	-1.72792	0.225	0.649	1.78006e-272	RARG(var.3)
MA0046.2	2.33038e-274	-1.48292	0.231	0.649	1.47513e-271	HNF1A
MA0495.3	8.64168e-273	-1.84889	0.208	0.626	5.47018e-270	MAFF
MA1585.1	5.08615e-272	-1.67021	0.239	0.658	3.21953e-269	ZKSCAN1
MA1463.1	2.07473e-271	-1.82104	0.222	0.65	1.3133e-268	ARGFX
MA0686.1	4.18521e-270	1.40294	0.741	0.329	2.64924e-267	SPDEF
MA0612.2	2.31832e-269	-1.74415	0.229	0.649	1.4675e-266	EMX1
MA1148.1	1.25063e-268	-2.01614	0.216	0.616	7.91652e-266	PPARA::RXRA
MA0666.1	2.21763e-266	-1.6986	0.246	0.65	1.40376e-263	MSX1
MA0708.1	2.21763e-266	-1.6986	0.246	0.65	1.40376e-263	MSX2
MA0876.1	2.21763e-266	-1.6986	0.246	0.65	1.40376e-263	BSX
MA1494.1	7.12658e-264	-1.75724	0.221	0.637	4.51112e-261	HNF4A(var.2)
MA0842.2	2.30641e-263	-1.84167	0.231	0.631	1.45995e-260	NRL
MA1632.1	1.08081e-262	-2.82054	0.189	0.599	6.84151e-260	ATF2
MA1504.1	2.72871e-262	-1.65514	0.238	0.652	1.72727e-259	HOXC4
MA0887.1	1.22062e-261	-1.69034	0.233	0.645	7.72652e-259	EVX1
MA0654.1	1.6715e-260	-1.76154	0.246	0.644	1.05806e-257	ISX
MA0701.2	1.6715e-260	-1.76154	0.246	0.644	1.05806e-257	LHX9
MA1118.1	1.75767e-260	-1.60801	0.235	0.649	1.1126e-257	SIX1
MA0674.1	2.48485e-259	-1.73557	0.234	0.649	1.57291e-256	NKX6-1
MA0693.2	3.05016e-257	-1.7968	0.238	0.635	1.93075e-254	VDR
MA1110.1	4.16026e-257	-2.36568	0.218	0.611	2.63344e-254	NR1H4
MA0702.2	1.80106e-255	-1.91052	0.222	0.635	1.14007e-252	LMX1A
MA0499.2	4.22222e-255	-1.90921	0.226	0.684	2.67267e-252	MYOD1
MA1536.1	2.08291e-251	-2.85097	0.192	0.597	1.31848e-248	NR2C2(var.2)
MA0847.2	4.50542e-250	-1.55475	0.236	0.631	2.85193e-247	FOXD2
MA0795.1	2.108e-249	-1.64174	0.243	0.645	1.33436e-246	SMAD3
MA1541.1	1.18068e-247	-2.02937	0.196	0.613	7.47373e-245	NR6A1
MA0088.2	8.71025e-247	-1.54408	0.237	0.64	5.51359e-244	ZNF143
MA0737.1	6.39284e-245	-1.68448	0.242	0.627	4.04667e-242	GLIS3
MA0703.2	1.40327e-242	-1.71682	0.227	0.635	8.88271e-240	LMX1B
MA0713.1	1.49094e-242	-1.48104	0.247	0.637	9.43766e-240	PHOX2A
MA0465.2	2.43047e-242	-1.41907	0.233	0.635	1.53849e-239	CDX2
MA0479.1	7.08942e-242	-1.52344	0.233	0.643	4.4876e-239	FOXH1
MA0782.2	1.19462e-241	-1.7476	0.233	0.641	7.56194e-239	PKNOX1
MA0710.1	2.84206e-239	-1.68558	0.247	0.638	1.79902e-236	NOTO
MA0641.1	3.3914e-238	0.0910796	0.791	0.292	2.14676e-235	ELF4
MA0634.1	3.96018e-235	-1.51159	0.238	0.63	2.50679e-232	ALX3
MA0715.1	9.8474e-234	-1.40055	0.241	0.631	6.23341e-231	PROP1
MA1519.1	1.00055e-232	-1.67418	0.239	0.641	6.33348e-230	LHX5
MA0163.1	1.53795e-231	-1.42152	0.212	0.598	9.73519e-229	PLAG1
MA1537.1	6.1757e-230	-2.06153	0.219	0.605	3.90922e-227	NR2F1(var.2)
MA0103.3	6.07425e-229	-2.41363	0.201	0.692	3.845e-226	ZEB1
MA0727.1	5.11728e-228	-1.63968	0.233	0.634	3.23924e-225	NR3C2
MA1496.1	7.15034e-228	-1.48531	0.259	0.639	4.52617e-225	HOXA4
MA1485.1	3.20439e-225	-1.41528	0.247	0.643	2.02838e-222	FERD3L
MA1557.1	1.76792e-224	-1.69817	0.253	0.636	1.11909e-221	SMAD5
MA0642.1	2.49637e-224	-1.58003	0.259	0.634	1.5802e-221	EN2
MA0630.1	1.20749e-223	-1.59109	0.26	0.628	7.64344e-221	SHOX
MA0717.1	1.20749e-223	-1.59109	0.26	0.628	7.64344e-221	RAX2
MA1577.1	3.93875e-222	-1.60675	0.256	0.636	2.49323e-219	TLX2
MA1500.1	5.91685e-222	-1.55108	0.256	0.636	3.74537e-219	HOXB6
MA1468.1	3.16006e-221	-1.66562	0.232	0.619	2.00032e-218	ATOH7
MA0697.1	4.61455e-221	-1.27602	0.238	0.626	2.92101e-218	ZIC3
MA1535.1	1.87351e-220	-2.26299	0.223	0.592	1.18593e-217	NR2C1
MA0744.2	5.52172e-218	-1.65453	0.253	0.638	3.49525e-215	SCRT2
MA0716.1	3.1268e-217	-1.59712	0.261	0.626	1.97926e-214	PRRX1
MA0721.1	3.1268e-217	-1.59712	0.261	0.626	1.97926e-214	UNCX
MA1652.1	2.12088e-215	-3.17546	0.17	0.497	1.34251e-212	ZKSCAN5
MA0846.1	3.56046e-215	-1.37487	0.249	0.626	2.25377e-212	FOXC2
MA1539.1	1.02098e-212	-1.78321	0.242	0.614	6.46282e-210	NR2F6(var.3)
MA1532.1	1.84512e-212	-1.60533	0.242	0.622	1.16796e-209	NR1D2
MA1150.1	3.73827e-211	-1.67189	0.242	0.616	2.36633e-208	RORB
MA0753.2	8.32226e-208	-1.24932	0.243	0.606	5.26799e-205	ZNF740
MA0783.1	1.84196e-207	-1.55296	0.259	0.644	1.16596e-204	PKNOX2
MA0775.1	3.5582e-206	-1.40115	0.264	0.628	2.25234e-203	MEIS3
MA0093.3	2.97843e-205	-3.38947	0.207	0.551	1.88535e-202	USF1
MA0904.2	9.28631e-204	-1.38549	0.28	0.629	5.87823e-201	HOXB5
MA0914.1	3.63539e-202	-1.3746	0.269	0.642	2.3012e-199	ISL2
MA0907.1	4.77506e-201	-1.39274	0.268	0.633	3.02261e-198	HOXC13
MA0628.1	1.65922e-200	-1.5066	0.274	0.627	1.05029e-197	POU6F1
MA0112.3	4.16454e-200	-1.9284	0.243	0.597	2.63615e-197	ESR1
MA0736.1	4.91452e-199	-1.41243	0.24	0.605	3.11089e-196	GLIS2
MA0610.1	1.01661e-196	-1.35313	0.265	0.631	6.43517e-194	DMRT3
MA0662.1	4.59466e-196	-1.43742	0.267	0.621	2.90842e-193	MIXL1
MA1106.1	9.78888e-196	-1.39446	0.282	0.628	6.19636e-193	HIF1A
MA1479.1	8.73481e-194	-1.31475	0.263	0.621	5.52913e-191	DMRTC2
MA1514.1	3.00702e-193	-1.12955	0.261	0.612	1.90344e-190	KLF17
MA0069.1	5.14704e-192	-1.40193	0.275	0.621	3.25808e-189	PAX6
MA1574.1	2.78125e-191	-1.88912	0.238	0.581	1.76053e-188	THRB
MA0673.1	3.47508e-191	-1.36014	0.261	0.618	2.19973e-188	NKX2-8
MA0526.3	2.86218e-190	-3.70193	0.195	0.546	1.81176e-187	USF2
MA1538.1	4.7726e-190	-1.87852	0.241	0.601	3.02106e-187	NR2F1(var.3)
MA0592.3	9.9434e-189	-2.34039	0.229	0.563	6.29417e-186	ESRRA
MA1631.1	1.15436e-187	-1.89313	0.248	0.675	7.30713e-185	ASCL1(var.2)
MA0506.1	1.22397e-187	0.715977	0.687	0.326	7.74772e-185	NRF1
MA1657.1	5.17966e-187	-1.31908	0.257	0.616	3.27872e-184	ZNF652
MA0593.1	5.75055e-186	-1.28275	0.256	0.619	3.6401e-183	FOXP2
MA1523.1	1.89153e-183	-1.43323	0.258	0.611	1.19734e-180	MSANTD3
MA1480.1	6.58513e-182	-1.31285	0.271	0.623	4.16839e-179	DPRX
MA0801.1	1.9416e-181	-1.62074	0.282	0.655	1.22904e-178	MGA
MA0803.1	1.9416e-181	-1.62074	0.282	0.655	1.22904e-178	TBX15
MA1552.1	1.58784e-179	-1.35447	0.279	0.62	1.0051e-176	RARB(var.3)
MA1550.1	3.94405e-179	-1.78872	0.248	0.594	2.49658e-176	PPARD
MA1545.1	6.84804e-179	1.26472	0.694	0.351	4.33481e-176	OVOL2
MA1544.1	8.86091e-179	1.2132	0.69	0.35	5.60895e-176	OVOL1
MA0852.2	1.45722e-177	-1.37291	0.276	0.617	9.22417e-175	FOXK1
MA0822.1	1.11517e-176	-1.61672	0.26	0.61	7.059e-174	HES7
MA0830.2	7.52796e-174	-1.893	0.259	0.678	4.7652e-171	TCF4
MA0141.3	2.20838e-173	-2.578	0.233	0.55	1.3979e-170	ESRRB
MA0074.1	5.6155e-173	-1.33796	0.273	0.607	3.55461e-170	RXRA::VDR
MA0843.1	6.57741e-172	-1.30027	0.279	0.603	4.1635e-169	TEF
MA1548.1	7.35207e-171	-1.22438	0.259	0.614	4.65386e-168	PLAGL2
MA1505.1	7.47289e-171	-1.37198	0.277	0.612	4.73034e-168	HOXC8
MA0504.1	6.17789e-170	-1.37537	0.25	0.586	3.9106e-167	NR2C2
MA0667.1	1.43552e-169	-1.36651	0.27	0.603	9.08682e-167	MYF6
MA0084.1	2.32928e-169	-1.31943	0.287	0.609	1.47443e-166	SRY
MA0613.1	5.39683e-169	-1.30186	0.279	0.614	3.4162e-166	FOXG1
MA0734.2	4.13169e-168	-1.45253	0.26	0.596	2.61536e-165	GLI2
MA1421.1	1.5842e-167	-1.25006	0.282	0.605	1.0028e-164	TCF7L1
MA0672.1	5.27724e-166	-1.18528	0.278	0.604	3.34049e-163	NKX2-3
MA1512.1	1.0171e-165	-0.875227	0.286	0.612	6.43826e-163	KLF11
MA1568.1	2.994e-165	-1.28523	0.264	0.602	1.8952e-162	TCF21(var.2)
MA0068.2	4.74163e-165	-1.48336	0.295	0.616	3.00145e-162	PAX4
MA0018.4	7.72688e-163	-2.09467	0.236	0.563	4.89111e-160	CREB1
MA1602.1	6.26159e-162	-1.26956	0.289	0.606	3.96358e-159	ZSCAN29
MA0746.2	2.51229e-161	-0.812586	0.284	0.601	1.59028e-158	SP3
MA0821.1	3.48723e-161	-1.7608	0.271	0.597	2.20742e-158	HES5
MA0747.1	6.98545e-161	-0.856921	0.281	0.606	4.42179e-158	SP8
MA0805.1	4.09694e-158	-1.45219	0.29	0.641	2.59336e-155	TBX1
MA0100.3	8.9473e-158	-1.29178	0.269	0.611	5.66364e-155	MYB
MA1493.1	3.5697e-157	-1.24042	0.289	0.609	2.25962e-154	HES6
MA1534.1	7.72777e-157	-1.25978	0.282	0.596	4.89168e-154	NR1I3
MA0259.1	1.68712e-156	-1.23933	0.293	0.608	1.06795e-153	ARNT::HIF1A
MA0752.1	5.4587e-156	-1.13476	0.281	0.612	3.45536e-153	ZNF410
MA0471.2	6.47525e-156	-1.01273	0.241	0.579	4.09883e-153	E2F6
MA0625.1	1.11299e-155	-1.58552	0.255	0.576	7.04521e-153	NFATC3
MA1152.1	1.08958e-154	-1.29227	0.273	0.586	6.89706e-152	SOX15
MA1555.1	2.36402e-153	-1.34503	0.288	0.596	1.49643e-150	RXRB(var.2)
MA0796.1	1.35075e-152	-1.27073	0.286	0.628	8.55023e-150	TGIF1
MA0669.1	1.74908e-152	-1.29998	0.281	0.603	1.10717e-149	NEUROG2
MA1580.1	8.22456e-152	-1.09304	0.308	0.615	5.20615e-149	ZBTB32
MA1556.1	9.08411e-150	-1.40745	0.275	0.602	5.75024e-147	RXRG(var.2)
MA1506.1	4.79954e-149	-1.21667	0.293	0.595	3.03811e-146	HOXD10
MA0639.1	1.48616e-148	-1.23586	0.288	0.59	9.40738e-146	DBP
MA1498.1	1.45398e-147	-1.16986	0.297	0.608	9.20371e-145	HOXA7
MA1502.1	1.45398e-147	-1.16986	0.297	0.608	9.20371e-145	HOXB8
MA0910.2	1.45398e-147	-1.16986	0.297	0.608	9.20371e-145	HOXD8
MA0646.1	6.68216e-147	-1.17	0.303	0.607	4.22981e-144	GCM1
MA0032.2	8.08324e-147	-1.08574	0.291	0.615	5.11669e-144	FOXC1
MA0829.2	5.63296e-146	-1.41651	0.283	0.609	3.56567e-143	SREBF1(var.2)
MA0681.2	1.03485e-145	-1.0015	0.279	0.595	6.55063e-143	PHOX2B
MA1648.1	6.74289e-145	-1.8595	0.292	0.658	4.26825e-142	TCF12(var.2)
MA0047.3	9.71123e-145	-1.14428	0.31	0.606	6.14721e-142	FOXA2
MA0511.2	2.42629e-144	1.01965	0.666	0.354	1.53584e-141	RUNX2
MA1578.1	6.81898e-144	-1.31164	0.277	0.576	4.31642e-141	VEZF1
MA0827.1	1.57327e-143	-1.12254	0.293	0.6	9.95882e-141	OLIG3
MA0797.1	3.68585e-143	-1.27304	0.294	0.618	2.33314e-140	TGIF2
MA0079.4	4.32498e-143	-0.905902	0.318	0.595	2.73771e-140	SP1
MA0104.4	1.55328e-142	-1.33648	0.281	0.591	9.83228e-140	MYCN
MA1566.1	5.92423e-142	-1.29336	0.307	0.633	3.75003e-139	TBX3
MA0502.2	4.26213e-141	-0.976589	0.316	0.613	2.69793e-138	NFYB
MA0679.2	1.19652e-140	-1.08275	0.297	0.601	7.57398e-138	ONECUT1
MA0680.1	4.86106e-139	-1.18966	0.285	0.609	3.07705e-136	PAX7
MA0855.1	1.67322e-138	-1.77249	0.274	0.564	1.05915e-135	RXRB
MA0780.1	1.89639e-138	-1.17294	0.298	0.599	1.20041e-135	PAX3
MA1565.1	1.15156e-137	-1.14457	0.313	0.629	7.28937e-135	TBX18
MA1558.1	1.47405e-136	-1.83483	0.292	0.667	9.33073e-134	SNAI1
MA0668.1	4.32255e-135	-1.19499	0.305	0.594	2.73618e-132	NEUROD2
MA1594.1	2.8429e-134	-1.21998	0.29	0.593	1.79955e-131	ZNF382
MA0696.1	2.99803e-132	-1.01835	0.296	0.589	1.89775e-129	ZIC1
MA1571.1	3.15545e-132	-1.22087	0.307	0.603	1.9974e-129	TGIF2LX
MA0863.1	3.71549e-132	-1.11844	0.303	0.607	2.35191e-129	MTF1
MA0779.1	1.57793e-130	-1.10061	0.308	0.58	9.98827e-128	PAX1
MA1683.1	1.16022e-128	-1.11008	0.309	0.6	7.34417e-126	FOXA3
MA0522.3	4.52843e-127	-1.67143	0.305	0.652	2.8665e-124	TCF3
MA0856.1	2.12614e-126	-1.74931	0.276	0.562	1.34585e-123	RXRG
MA1146.1	2.66638e-126	-1.45871	0.291	0.576	1.68782e-123	NR1H4::RXRA
MA1559.1	1.67923e-125	-1.75319	0.298	0.66	1.06296e-122	SNAI3
MA0745.2	1.79652e-125	-1.88353	0.307	0.652	1.1372e-122	SNAI2
MA1525.1	3.84027e-125	-1.41174	0.281	0.57	2.43089e-122	NFATC4
MA1587.1	1.11638e-124	-1.36576	0.28	0.59	7.06666e-122	ZNF135
MA0645.1	1.6354e-124	-3.70748	0.767	0.264	1.03521e-121	ETV6
MA0481.3	1.66919e-122	-1.16018	0.319	0.597	1.0566e-119	FOXP1
MA0826.1	2.50645e-122	-1.12366	0.317	0.598	1.58658e-119	OLIG1
MA1491.1	8.1179e-122	-1.38814	0.271	0.576	5.13863e-119	GLI3
MA1471.1	1.86433e-121	-0.985686	0.323	0.601	1.18012e-118	BARX2
MA0806.1	3.95816e-120	-1.25859	0.31	0.637	2.50551e-117	TBX4
MA0807.1	3.95816e-120	-1.25859	0.31	0.637	2.50551e-117	TBX5
MA0767.1	1.44165e-119	-1.00378	0.312	0.595	9.12566e-117	GCM2
MA1524.1	2.96037e-119	-1.20027	0.31	0.585	1.87391e-116	MSGN1
MA0030.1	8.84262e-119	-1.06459	0.319	0.6	5.59738e-116	FOXF2
MA0017.2	1.71221e-117	-2.43407	0.256	0.529	1.08383e-114	NR2F1
MA0766.2	1.82711e-116	-1.12028	0.329	0.589	1.15656e-113	GATA5
MA0623.2	9.7545e-116	-1.11335	0.312	0.596	6.1746e-113	NEUROG1
MA1478.1	2.02285e-114	-1.03911	0.307	0.586	1.28047e-111	DMRTA2
MA0819.1	2.09577e-114	-1.05173	0.305	0.595	1.32662e-111	CLOCK
MA1567.1	5.50652e-114	-1.12819	0.321	0.625	3.48563e-111	TBX6
MA1560.1	8.79885e-114	-1.08778	0.31	0.589	5.56967e-111	SOHLH2
MA0063.2	7.75544e-113	-1.08848	0.302	0.581	4.9092e-110	NKX2-5
MA0148.4	2.14406e-112	-1.1259	0.315	0.597	1.35719e-109	FOXA1
MA0140.2	1.57415e-111	-1.06094	0.319	0.594	9.96435e-109	GATA1::TAL1
MA0724.1	4.74654e-111	-1.00517	0.331	0.592	3.00456e-108	VENTX
MA0009.2	5.4148e-110	-1.00141	0.343	0.603	3.42757e-107	TBXT
MA0059.1	7.4525e-110	-1.41215	0.309	0.566	4.71743e-107	MAX::MYC
MA0684.2	5.71482e-108	0.454791	0.644	0.363	3.61748e-105	RUNX3
MA1570.1	9.06359e-107	-1.38318	0.3	0.556	5.73725e-104	TFAP4(var.2)
MA0657.1	1.73831e-106	-0.866183	0.335	0.594	1.10035e-103	KLF13
MA0083.3	1.42496e-104	-1.17002	0.303	0.566	9.01998e-102	SRF
MA0147.3	1.21016e-102	-1.14802	0.298	0.567	7.66031e-100	MYC
MA1147.1	6.84264e-101	-1.21943	0.321	0.561	4.33139e-98	NR4A2::RXRA
MA0751.1	1.41236e-99	-0.907033	0.32	0.579	8.94026e-97	ZIC4
MA0678.1	5.69647e-98	-0.902323	0.325	0.583	3.60587e-95	OLIG2
MA1103.2	4.53639e-96	-1.00784	0.33	0.582	2.87154e-93	FOXK2
MA1572.1	2.21e-95	-0.969029	0.338	0.59	1.39893e-92	TGIF2LY
MA0649.1	3.77583e-95	-1.1791	0.305	0.568	2.3901e-92	HEY2
MA0823.1	3.89425e-95	-1.22055	0.307	0.561	2.46506e-92	HEY1
MA0817.1	6.35262e-95	-1.01793	0.331	0.588	4.02121e-92	BHLHE23
MA0035.4	1.51019e-94	-0.955088	0.328	0.576	9.55953e-92	GATA1
MA0036.3	8.87628e-93	-1.01396	0.323	0.583	5.61868e-90	GATA2
MA0031.1	3.45501e-91	-1.02503	0.326	0.585	2.18702e-88	FOXD1
MA0157.2	3.45501e-91	-1.02503	0.326	0.585	2.18702e-88	FOXO3
MA0784.1	5.02661e-91	-0.717541	0.332	0.587	3.18185e-88	POU1F1
MA0042.2	2.1169e-90	-1.00465	0.331	0.583	1.34e-87	FOXI1
MA0033.2	2.1169e-90	-1.00465	0.331	0.583	1.34e-87	FOXL1
MA0848.1	2.1169e-90	-1.00465	0.331	0.583	1.34e-87	FOXO4
MA0849.1	2.1169e-90	-1.00465	0.331	0.583	1.34e-87	FOXO6
MA0850.1	2.1169e-90	-1.00465	0.331	0.583	1.34e-87	FOXP3
MA0818.1	1.43506e-89	-0.954622	0.331	0.583	9.08393e-87	BHLHE22
MA1513.1	1.9888e-89	0.269206	0.646	0.374	1.25891e-86	KLF15
MA0773.1	2.99377e-89	-1.34605	0.297	0.552	1.89506e-86	MEF2D
MA0873.1	3.9068e-87	-0.892782	0.328	0.586	2.473e-84	HOXD12
MA0071.1	7.34441e-86	-1.2621	0.305	0.55	4.64901e-83	RORA
MA0660.1	8.52398e-85	-1.41038	0.317	0.549	5.39568e-82	MEF2B
MA1542.1	2.87105e-82	-0.930813	0.347	0.578	1.81738e-79	OSR1
MA0758.1	8.34892e-82	-0.90412	0.339	0.566	5.28487e-79	E2F7
MA1126.1	3.61862e-81	-1.20595	0.321	0.545	2.29059e-78	FOS::JUN(var.2)
MA1151.1	1.47407e-80	-0.975858	0.335	0.56	9.33088e-78	RORC
MA0865.1	1.90838e-77	-1.03323	0.323	0.554	1.208e-74	E2F8
MA0498.2	2.34715e-77	-0.893572	0.345	0.573	1.48575e-74	MEIS1
MA1489.1	1.46281e-76	-0.977558	0.348	0.567	9.25959e-74	FOXN3
MA0781.1	2.55304e-73	-0.886933	0.352	0.562	1.61607e-70	PAX9
MA0761.2	6.12902e-73	-3.35594	0.654	0.278	3.87967e-70	ETV1
MA1584.1	9.22333e-73	-0.767582	0.336	0.567	5.83837e-70	ZIC5
MA0735.1	2.39961e-71	-0.914046	0.341	0.568	1.51895e-68	GLIS1
MA0845.1	1.93505e-70	-0.800811	0.348	0.562	1.22489e-67	FOXB1
MA0768.1	3.77405e-69	-0.804706	0.347	0.564	2.38897e-66	LEF1
MA0058.3	2.28051e-67	-1.02375	0.328	0.553	1.44356e-64	MAX
MA1104.2	6.09001e-66	-0.787762	0.349	0.578	3.85498e-63	GATA6
MA1596.1	7.33069e-66	-0.6965	0.337	0.569	4.64033e-63	ZNF460
MA0115.1	1.16165e-65	-1.60516	0.314	0.531	7.35325e-63	NR1H2::RXRA
MA0160.1	1.7966e-65	-2.69856	0.311	0.484	1.13725e-62	NR4A2
MA0139.1	4.67649e-65	0.279371	0.578	0.408	2.96022e-62	CTCF
MA1583.1	1.33628e-64	-0.725022	0.372	0.579	8.45867e-62	ZFP57
MA0689.1	1.72869e-64	-0.707878	0.378	0.576	1.09426e-61	TBX20
MA0497.1	3.7973e-64	-1.22225	0.31	0.54	2.40369e-61	MEF2C
MA0070.1	1.78494e-63	-0.731841	0.375	0.575	1.12987e-60	PBX1
MA0733.1	3.50233e-63	-0.773791	0.325	0.537	2.21697e-60	EGR4
MA0482.2	1.71364e-60	-0.857557	0.355	0.565	1.08473e-57	GATA4
MA1509.1	6.4181e-60	-0.836826	0.364	0.566	4.06266e-57	IRF6
MA0774.1	5.63638e-59	-0.864101	0.348	0.559	3.56783e-56	MEIS2
MA1466.1	1.60492e-58	-0.911378	0.363	0.562	1.01591e-55	ATF6
MA0037.3	2.55647e-58	-0.88244	0.352	0.561	1.61825e-55	GATA3
MA0905.1	1.47283e-57	-0.725218	0.367	0.563	9.323e-55	HOXC10
MA0635.1	9.27431e-56	-0.760312	0.368	0.562	5.87064e-53	BARHL2
MA0651.1	1.02152e-55	-0.809914	0.369	0.565	6.46623e-53	HOXC11
MA0062.3	1.40018e-55	-4.25034	0.635	0.273	8.86313e-53	GABPA
MA0786.1	1.8291e-52	-0.498904	0.372	0.563	1.15782e-49	POU3F1
MA0906.1	2.87302e-52	-0.742226	0.372	0.555	1.81862e-49	HOXC12
MA1419.1	4.2732e-52	-0.629746	0.598	0.386	2.70494e-49	IRF4
MA0804.1	9.34527e-52	-0.692833	0.375	0.558	5.91556e-49	TBX19
MA0757.1	1.25517e-49	-0.669998	0.373	0.545	7.9452e-47	ONECUT3
MA1131.1	3.19516e-48	-0.995381	0.363	0.532	2.02254e-45	FOSL2::JUN(var.2)
MA0685.1	1.4899e-46	-0.492868	0.383	0.55	9.43108e-44	SP4
MA0516.2	1.80251e-46	-0.513037	0.37	0.552	1.14099e-43	SP2
MA1475.1	2.17375e-46	0.484227	0.572	0.406	1.37598e-43	CREB3L4(var.2)
MA0769.2	1.17886e-45	-0.588137	0.376	0.552	7.46217e-43	TCF7
MA0825.1	2.78633e-45	-0.796238	0.353	0.546	1.76375e-42	MNT
MA0136.2	9.18632e-45	-4.6095	0.618	0.278	5.81494e-42	ELF5
MA0014.3	1.01771e-44	-0.948097	0.361	0.533	6.44211e-42	PAX5
MA1145.1	3.51326e-44	-0.943062	0.363	0.52	2.22389e-41	FOSL2::JUND(var.2)
MA0785.1	4.59906e-44	-0.524396	0.375	0.556	2.91121e-41	POU2F1
MA0895.1	8.07468e-44	-0.628513	0.387	0.538	5.11127e-41	HMBOX1
MA0864.2	8.85549e-44	0.587783	0.591	0.434	5.60552e-41	E2F2
MA0052.4	5.88297e-43	-1.00947	0.35	0.532	3.72392e-40	MEF2A
MA1546.1	1.05985e-42	-0.650755	0.381	0.549	6.70882e-40	PAX3(var.2)
MA1503.1	9.00638e-42	-0.605327	0.387	0.557	5.70104e-39	HOXB9
MA1561.1	2.21881e-41	-0.627296	0.375	0.544	1.40451e-38	SOX12
MA0509.2	1.53353e-39	-0.566935	0.393	0.557	9.70727e-37	RFX1
MA0798.2	5.41466e-39	-0.625046	0.39	0.549	3.42748e-36	RFX3
MA0787.1	1.75841e-37	-0.397966	0.388	0.54	1.11307e-34	POU3F2
MA1111.1	3.87758e-37	-3.18089	0.323	0.442	2.45451e-34	NR2F2
MA0690.1	7.1011e-37	-0.527669	0.409	0.553	4.495e-34	TBX21
MA1653.1	7.22612e-37	-0.586347	0.338	0.516	4.57414e-34	ZNF148
MA0473.3	8.50548e-37	-4.52021	0.591	0.276	5.38397e-34	ELF1
MA0788.1	1.44971e-36	-0.488987	0.388	0.55	9.17668e-34	POU3F3
MA0789.1	2.59093e-36	-0.427446	0.398	0.549	1.64006e-33	POU3F4
MA0749.1	9.23789e-36	0.600043	0.576	0.435	5.84759e-33	ZBED1
MA0605.2	1.1179e-34	-0.817603	0.383	0.52	7.07631e-32	ATF3
MA0839.1	9.6481e-34	-0.668126	0.385	0.538	6.10725e-31	CREB3L1
MA0653.1	1.95125e-32	-1.27265	0.569	0.395	1.23514e-29	IRF9
MA0794.1	1.53402e-30	-0.620351	0.39	0.542	9.71033e-28	PROX1
MA1115.1	2.87357e-30	-0.461385	0.381	0.539	1.81897e-27	POU5F1
MA0616.2	1.16772e-29	-0.723329	0.371	0.532	7.3917e-27	HES2
MA0527.1	3.26383e-29	0.304888	0.557	0.433	2.06601e-26	ZBTB33
MA1136.1	4.03693e-29	-0.713006	0.387	0.527	2.55538e-26	FOSB::JUNB(var.2)
MA0485.2	8.82308e-29	-0.519064	0.411	0.54	5.58501e-26	HOXC9
MA0523.1	2.65143e-28	-0.550449	0.409	0.539	1.67835e-25	TCF7L2
MA0908.1	1.60692e-24	-0.485756	0.404	0.53	1.01718e-21	HOXD11
MA0800.1	5.3712e-23	-0.359614	0.417	0.541	3.39997e-20	EOMES
MA0652.1	1.82027e-22	-1.12221	0.548	0.389	1.15223e-19	IRF8
MA0060.3	3.40104e-22	0.410295	0.592	0.462	2.15286e-19	NFYA
MA0792.1	3.7833e-22	-0.293039	0.4	0.531	2.39483e-19	POU5F1B
MA1564.1	9.41533e-22	-0.356986	0.407	0.539	5.95991e-19	SP9
MA0507.1	1.95871e-21	-0.301496	0.409	0.524	1.23986e-18	POU2F2
MA0627.2	4.15903e-21	-0.372448	0.406	0.53	2.63266e-18	POU2F3
MA0080.5	1.48796e-20	-9.62725	0.19	0.287	9.41881e-18	SPI1
MA1554.1	7.00439e-20	0.364547	0.562	0.467	4.43378e-17	RFX7
MA1127.1	1.47963e-18	-0.576347	0.411	0.521	9.36603e-16	FOSB::JUN
MA1122.1	1.83434e-18	-0.569444	0.401	0.506	1.16114e-15	TFDP1
MA0688.1	1.0951e-17	-0.301328	0.424	0.542	6.932e-15	TBX2
MA0600.2	3.66081e-17	0.190859	0.546	0.46	2.3173e-14	RFX2
MA0862.1	5.84341e-17	0.249369	0.546	0.453	3.69888e-14	GMEB2
MA0802.1	1.08191e-16	-0.288784	0.431	0.547	6.84846e-14	TBR1
MA0799.1	1.30919e-16	0.255016	0.54	0.465	8.2872e-14	RFX4
MA0687.1	5.66483e-16	-11.2925	0.204	0.282	3.58584e-13	SPIC
MA0741.1	5.95902e-16	-0.379092	0.403	0.516	3.77206e-13	KLF16
MA1102.2	6.25243e-15	-0.0574968	0.509	0.442	3.95779e-12	CTCFL
MA0072.1	2.3146e-14	-0.553177	0.414	0.506	1.46514e-11	RORA(var.2)
MA0844.1	3.78963e-14	-0.482882	0.42	0.516	2.39883e-11	XBP1
MA0871.2	1.98944e-13	-1.25351	0.391	0.478	1.25931e-10	TFEC
MA0609.2	2.38817e-13	-0.654311	0.41	0.504	1.51171e-10	CREM
MA0656.1	3.68198e-13	-0.593897	0.425	0.495	2.33069e-10	JDP2(var.2)
MA0517.1	3.89492e-12	-3.4119	0.328	0.397	2.46548e-09	STAT1::STAT2
MA0828.1	4.28437e-12	-0.41873	0.423	0.52	2.71201e-09	SREBF2(var.2)
MA0756.1	1.12297e-11	-0.418259	0.43	0.511	7.10838e-09	ONECUT2
MA1470.1	1.29538e-11	-0.430571	0.423	0.525	8.19977e-09	BACH2(var.2)
MA0472.2	6.01069e-11	-0.442558	0.414	0.492	3.80477e-08	EGR2
MA0024.3	2.38005e-10	0.194111	0.54	0.455	1.50657e-07	E2F1
MA0831.2	5.177e-10	-2.06849	0.39	0.443	3.27704e-07	TFE3
MA0131.2	9.53241e-10	-0.0416113	0.525	0.448	6.03402e-07	HINFP
MA1650.1	1.12978e-09	-0.0565119	0.503	0.439	7.15149e-07	ZBTB14
MA0692.1	1.29267e-09	-1.76316	0.377	0.452	8.18263e-07	TFEB
MA0598.3	1.49192e-09	-9.73236	0.492	0.265	9.44388e-07	EHF
MA1418.1	8.44893e-08	-2.89323	0.369	0.428	5.34817e-05	IRF3
MA0081.2	1.23543e-07	-11.472	0.236	0.267	7.82029e-05	SPIB
MA0664.1	1.45912e-07	-0.271941	0.481	0.445	9.23621e-05	MLXIPL
MA0772.1	3.09277e-07	-0.837826	0.499	0.429	0.000195772	IRF7
MA1464.1	3.50166e-07	-0.838147	0.409	0.479	0.000221655	ARNT2
MA1143.1	4.11689e-07	-0.390743	0.44	0.514	0.000260599	FOSL1::JUND(var.2)
MA1139.1	1.08229e-06	-0.501527	0.431	0.494	0.000685089	FOSL2::JUNB(var.2)
MA0755.1	1.676e-06	0.132723	0.525	0.467	0.00106091	CUX2
MA0640.2	2.94997e-06	-7.41558	0.462	0.278	0.00186733	ELF3
MA1651.1	4.11525e-06	-0.283049	0.441	0.518	0.00260495	ZFP42
MA0834.1	1.54571e-05	-0.483779	0.441	0.499	0.00978432	ATF7
MA1644.1	5.0702e-05	0.121108	0.543	0.48	0.0320944	NFYC
MA0510.2	5.73171e-05	-0.0186908	0.518	0.478	0.0362817	RFX5
MA0777.1	8.89962e-05	0.131865	0.502	0.48	0.0563346	MYBL2
MA0470.2	0.000105802	0.0885985	0.524	0.475	0.0669724	E2F4
MA0877.2	0.000144708	-0.277644	0.456	0.503	0.0916002	BARHL1
MA0464.2	0.000146206	-0.597676	0.441	0.491	0.0925485	BHLHE40
MA0051.1	0.000401699	-1.5885	0.426	0.453	0.254275	IRF2
MA0764.2	0.000494684	-4.0606	0.455	0.308	0.313135	ETV4
MA0620.3	0.000507289	-1.83842	0.405	0.437	0.321114	MITF
MA1125.1	0.000783689	-0.443813	0.49	0.472	0.496075	ZNF384
MA0050.2	0.00120676	-2.31413	0.364	0.414	0.76388	IRF1
MA1112.2	0.00148405	-1.69764	0.466	0.395	0.939401	NR4A1
MA0594.2	0.00176449	0.0418694	0.511	0.471	1	HOXA9
MA1129.1	0.00312937	-0.410822	0.462	0.489	1	FOSL1::JUN(var.2)
MA0694.1	0.00427768	-0.393149	0.452	0.492	1	ZBTB7B
MA0637.1	0.00749926	-0.203939	0.464	0.5	1	CENPB
MA0632.2	0.0103117	-0.194971	0.476	0.466	1	TCFL5
MA0695.1	0.0142288	-0.13776	0.494	0.476	1	ZBTB7C
MA1420.1	0.0231753	-0.549833	0.486	0.467	1	IRF5
MA0711.1	0.0242731	-0.0990798	0.472	0.498	1	OTX1
MA1474.1	0.0245775	-0.353935	0.447	0.493	1	CREB3L4
MA0776.1	0.0296085	-0.254084	0.457	0.507	1	MYBL1
MA0469.3	0.0297087	-0.129394	0.473	0.508	1	E2F3
MA0073.1	0.0353113	-0.276941	0.443	0.479	1	RREB1
MA0740.1	0.0604649	-0.168637	0.484	0.499	1	KLF14
MA0636.1	0.0861833	-0.580756	0.473	0.454	1	BHLHE41
MA0162.4	0.0879796	-0.187933	0.463	0.464	1	EGR1
MA0095.2	0.0995493	-0.169888	0.499	0.482	1	YY1
MA0663.1	0.155635	-0.534864	0.461	0.464	1	MLX
MA0732.1	0.309865	-0.229132	0.452	0.471	1	EGR3
MA0638.1	0.320782	-0.233137	0.469	0.493	1	CREB3
MA1099.2	0.586376	-0.27473	0.463	0.482	1	HES1
MA1508.1	0.630404	-5.99666	0.36	0.298	1	IKZF1
MA0754.1	0.636703	-0.0742889	0.474	0.497	1	CUX1
MA1140.2	0.712002	-0.256727	0.468	0.48	1	JUNB(var.2)
MA1133.1	0.969091	-0.359464	0.467	0.47	1	JUN::JUNB(var.2)

## Sheet: DC
	p_val	avg_log2FC	pct.1	pct.2	p_val_adj	gene
MA0687.1	5.25559e-136	7.16189	0.995	0.225	3.32679e-133	SPIC
MA0080.5	7.54346e-136	7.14669	0.989	0.223	4.77501e-133	SPI1
MA1508.1	4.03129e-135	6.04984	0.989	0.297	2.55181e-132	IKZF1
MA0093.3	7.21214e-135	5.05041	0.989	0.401	4.56529e-132	USF1
MA0526.3	9.71567e-135	5.5876	0.995	0.393	6.15002e-132	USF2
MA0640.2	2.45119e-134	7.49169	0.989	0.323	1.5516e-131	ELF3
MA0081.2	4.09982e-133	7.29752	0.989	0.228	2.59519e-130	SPIB
MA0598.3	4.79542e-132	8.30473	0.989	0.326	3.0355e-129	EHF
MA0764.2	3.62966e-131	5.505	0.984	0.34	2.29758e-128	ETV4
MA0473.3	4.17226e-127	5.90348	0.989	0.371	2.64104e-124	ELF1
MA0062.3	1.82495e-126	5.74641	0.989	0.387	1.15519e-123	GABPA
MA0050.2	2.14145e-126	4.49073	0.989	0.373	1.35554e-123	IRF1
MA0831.2	1.33973e-123	4.55535	0.989	0.402	8.48049e-121	TFE3
MA0149.1	2.85188e-123	3.60632	0.984	0.423	1.80524e-120	EWSR1-FLI1
MA0761.2	6.80917e-123	5.41241	0.989	0.397	4.31021e-120	ETV1
MA0136.2	4.54156e-122	5.34424	0.989	0.383	2.87481e-119	ELF5
MA0017.2	5.77148e-120	4.25172	0.978	0.406	3.65335e-117	NR2F1
MA0645.1	1.49908e-117	4.99994	0.989	0.432	9.48918e-115	ETV6
MA1652.1	2.86606e-117	4.32673	0.989	0.351	1.81422e-114	ZKSCAN5
MA1111.1	4.02285e-116	5.32502	0.978	0.376	2.54646e-113	NR2F2
MA0620.3	1.25049e-115	4.41251	0.984	0.404	7.91562e-113	MITF
MA0517.1	5.17409e-115	4.90981	0.984	0.349	3.2752e-112	STAT1::STAT2
MA1647.1	7.41548e-115	3.97719	0.989	0.41	4.694e-112	PRDM4
MA0160.1	8.97091e-115	4.80808	0.984	0.398	5.67859e-112	NR4A2
MA0692.1	1.00646e-114	4.09838	0.973	0.403	6.37089e-112	TFEB
MA1536.1	6.00586e-114	4.61068	0.984	0.425	3.80171e-111	NR2C2(var.2)
MA1418.1	2.40005e-110	5.14417	0.989	0.384	1.51923e-107	IRF3
MA1632.1	1.67583e-108	4.14631	0.973	0.426	1.0608e-105	ATF2
MA0018.4	1.49703e-106	3.82209	0.957	0.422	9.47618e-104	CREB1
MA0137.3	1.46866e-105	3.88629	0.995	0.443	9.29661e-103	STAT1
MA0497.1	9.90356e-102	2.84499	0.989	0.434	6.26895e-99	MEF2C
MA1540.1	4.7672e-101	4.32152	0.973	0.424	3.01764e-98	NR5A1
MA0592.3	2.16737e-99	3.85204	0.989	0.417	1.37195e-96	ESRRA
MA0141.3	3.76124e-99	4.30516	0.984	0.411	2.38086e-96	ESRRB
MA1110.1	4.60566e-99	3.66969	0.962	0.445	2.91538e-96	NR1H4
MA0508.3	1.37253e-98	3.0235	0.973	0.449	8.68813e-96	PRDM1
MA1535.1	1.0414e-96	3.91922	0.978	0.434	6.59204e-94	NR2C1
MA0838.1	6.67273e-96	3.94566	0.995	0.443	4.22384e-93	CEBPG
MA0871.2	8.29289e-96	3.41298	0.968	0.426	5.2494e-93	TFEC
MA0495.3	6.96041e-93	2.97271	0.984	0.45	4.40594e-90	MAFF
MA1112.2	1.8616e-92	4.81846	0.978	0.401	1.17839e-89	NR4A1
MA0488.1	1.2469e-91	3.67744	0.973	0.443	7.89291e-89	JUN
MA0641.1	2.35238e-91	3.08663	0.968	0.46	1.48905e-88	ELF4
MA1537.1	1.25027e-90	3.46132	0.962	0.442	7.91423e-88	NR2F1(var.2)
MA0837.1	5.05351e-89	3.74319	0.995	0.446	3.19887e-86	CEBPE
MA0659.2	6.43264e-89	3.09144	0.984	0.443	4.07186e-86	MAFG
MA0855.1	1.50589e-88	3.3969	0.984	0.436	9.53225e-86	RXRB
MA0052.4	2.85433e-88	2.58762	0.973	0.445	1.80679e-85	MEF2A
MA0102.4	3.20079e-88	4.04228	1	0.489	2.0261e-85	CEBPA
MA0770.1	6.86678e-87	3.11786	0.984	0.457	4.34667e-84	HSF2
MA0115.1	4.02529e-85	3.66905	0.973	0.431	2.54801e-82	NR1H2::RXRA
MA0528.2	4.16577e-85	2.40475	0.984	0.468	2.63694e-82	ZNF263
MA0163.1	6.61497e-85	2.4423	0.973	0.435	4.18728e-82	PLAG1
MA0486.2	9.79517e-85	3.02969	0.978	0.456	6.20034e-82	HSF1
MA1574.1	1.58933e-84	3.36257	0.968	0.434	1.00605e-81	THRB
MA1125.1	4.37077e-84	2.56216	0.957	0.461	2.7667e-81	ZNF384
MA0660.1	4.73767e-84	2.8527	0.957	0.444	2.99895e-81	MEF2B
MA0144.2	1.85821e-82	3.09091	1	0.478	1.17625e-79	STAT3
MA0773.1	2.76639e-82	2.85234	0.968	0.437	1.75112e-79	MEF2D
MA0112.3	3.93157e-82	3.03777	0.957	0.446	2.48869e-79	ESR1
MA0836.2	2.78685e-81	3.86651	1	0.491	1.76408e-78	CEBPD
MA0057.1	1.21183e-80	2.83592	0.973	0.439	7.67085e-78	MZF1(var.2)
MA1541.1	8.04661e-80	2.9024	0.989	0.437	5.0935e-77	NR6A1
MA0484.2	5.33822e-79	3.14828	0.973	0.456	3.37909e-76	HNF4G
MA0492.1	4.11325e-78	3.31465	0.968	0.445	2.60369e-75	JUND(var.2)
MA1538.1	6.57408e-78	3.29318	0.978	0.447	4.16139e-75	NR2F1(var.3)
MA0504.1	8.76355e-78	2.63568	0.973	0.441	5.54733e-75	NR2C2
MA1550.1	2.69564e-77	3.3429	0.968	0.445	1.70634e-74	PPARD
MA0842.2	3.55457e-77	2.74159	0.957	0.464	2.25004e-74	NRL
MA0466.2	3.59083e-77	3.52219	0.973	0.461	2.27299e-74	CEBPB
MA0653.1	5.58225e-77	3.92992	0.978	0.441	3.53356e-74	IRF9
MA1491.1	1.54004e-76	2.84952	0.957	0.443	9.74843e-74	GLI3
MA1636.1	1.54333e-76	3.19656	0.989	0.485	9.76925e-74	CEBPG(var.2)
MA1464.1	6.13703e-76	2.67775	0.951	0.434	3.88474e-73	ARNT2
MA0856.1	2.12388e-75	3.4763	0.957	0.436	1.34441e-72	RXRG
MA1593.1	1.65087e-74	3.02087	0.941	0.462	1.045e-71	ZNF317
MA0107.1	3.87547e-74	4.33587	0.989	0.448	2.45317e-71	RELA
MA0101.1	3.94923e-74	4.47628	0.989	0.453	2.49986e-71	REL
MA0258.2	5.20254e-74	3.03398	0.957	0.458	3.29321e-71	ESR2
MA1522.1	1.12948e-73	2.0894	0.968	0.45	7.14963e-71	MAZ
MA0056.2	2.30487e-73	3.21009	0.968	0.448	1.45898e-70	MZF1
MA0051.1	5.60947e-73	3.42427	0.978	0.423	3.55079e-70	IRF2
MA0071.1	7.76934e-73	2.8618	0.941	0.44	4.91799e-70	RORA
MA0059.1	2.11685e-72	2.85639	0.935	0.453	1.33997e-69	MAX::MYC
MA1146.1	2.23206e-72	2.82066	0.935	0.452	1.41289e-69	NR1H4::RXRA
MA0765.2	2.43307e-72	2.68361	0.984	0.471	1.54013e-69	ETV5
MA0833.2	4.92623e-72	2.90154	0.978	0.464	3.1183e-69	ATF4
MA0114.4	2.75156e-71	2.9834	0.957	0.457	1.74174e-68	HNF4A
MA0729.1	3.64356e-71	2.85053	0.962	0.447	2.30637e-68	RARA
MA0652.1	3.91343e-71	3.45266	0.957	0.43	2.4772e-68	IRF8
MA1597.1	3.64887e-70	2.90641	0.995	0.479	2.30974e-67	ZNF528
MA0771.1	7.56197e-70	2.67671	0.957	0.465	4.78673e-67	HSF4
MA1154.1	8.21432e-70	2.70429	0.968	0.454	5.19966e-67	ZNF282
MA0734.2	1.44093e-69	2.62772	0.935	0.453	9.12111e-67	GLI2
MA1646.1	1.44349e-68	2.56068	0.984	0.474	9.13727e-66	OSR2
MA1539.1	2.81109e-68	2.73794	0.951	0.457	1.77942e-65	NR2F6(var.3)
MA1420.1	3.49125e-68	2.48359	0.946	0.457	2.20996e-65	IRF5
MA1531.1	4.28141e-67	2.32691	0.984	0.467	2.71013e-64	NR1D1
MA0772.1	1.28398e-66	3.26503	0.957	0.437	8.12759e-64	IRF7
MA1576.1	6.82238e-66	2.52285	0.978	0.46	4.31856e-63	THRB(var.3)
MA1556.1	8.77996e-66	2.40514	0.924	0.463	5.55771e-63	RXRG(var.2)
MA1148.1	9.47889e-65	3.03325	0.941	0.449	6.00014e-62	PPARA::RXRA
MA1419.1	1.09182e-64	3.04171	0.951	0.447	6.91124e-62	IRF4
MA0663.1	1.15297e-64	2.70011	0.93	0.445	7.29831e-62	MLX
MA0058.3	1.74976e-63	2.38383	0.93	0.452	1.1076e-60	MAX
MA0691.1	7.22002e-63	2.75336	0.946	0.471	4.57027e-60	TFAP4
MA0730.1	3.97976e-62	2.63273	0.946	0.463	2.51919e-59	RARA(var.2)
MA1589.1	1.49279e-61	2.50853	0.935	0.466	9.44935e-59	ZNF140
MA1653.1	6.85864e-61	1.54752	0.946	0.431	4.34152e-58	ZNF148
MA1131.1	3.20826e-60	2.40837	0.908	0.453	2.03083e-57	FOSL2::JUN(var.2)
MA1467.1	9.57291e-60	2.9703	0.962	0.472	6.05965e-57	ATOH1(var.2)
MA0649.1	1.30896e-59	2.28261	0.924	0.453	8.28573e-57	HEY2
MA0823.1	1.73285e-59	2.38963	0.93	0.449	1.09689e-56	HEY1
MA0636.1	1.07667e-58	2.32191	0.903	0.444	6.8153e-56	BHLHE41
MA0664.1	1.154e-58	2.27653	0.903	0.442	7.30481e-56	MLXIPL
MA1108.2	1.3142e-58	2.89285	0.957	0.475	8.31887e-56	MXI1
MA1109.1	4.98684e-58	2.63433	0.951	0.462	3.15667e-55	NEUROD1
MA1532.1	9.44888e-58	2.3387	0.946	0.462	5.98114e-55	NR1D2
MA0043.3	8.72277e-57	2.44424	0.962	0.476	5.52151e-54	HLF
MA0014.3	1.3016e-56	2.372	0.919	0.452	8.23915e-54	PAX5
MA1523.1	2.90248e-56	2.22783	0.914	0.463	1.83727e-53	MSANTD3
MA1645.1	3.90297e-56	2.13932	0.941	0.471	2.47058e-53	NKX2-2
MA0609.2	4.72625e-56	2.22578	0.914	0.452	2.99172e-53	CREM
MA1126.1	4.88615e-56	2.58481	0.876	0.446	3.09293e-53	FOS::JUN(var.2)
MA0155.1	7.4378e-56	2.02173	0.951	0.463	4.70812e-53	INSM1
MA1150.1	2.46587e-55	2.67368	0.941	0.459	1.5609e-52	RORB
MA1147.1	2.48075e-55	2.39129	0.924	0.454	1.57032e-52	NR4A2::RXRA
MA1655.1	3.03406e-55	2.29368	0.978	0.484	1.92056e-52	ZNF341
MA0782.2	3.39614e-55	2.37867	0.919	0.473	2.14976e-52	PKNOX1
MA0750.2	1.32745e-54	1.88449	0.984	0.472	8.40275e-52	ZBTB7A
MA0104.4	2.91941e-54	2.26472	0.941	0.458	1.84799e-51	MYCN
MA1642.1	3.08882e-54	2.65049	0.957	0.46	1.95522e-51	NEUROG2(var.2)
MA1145.1	3.23096e-54	2.26223	0.886	0.446	2.0452e-51	FOSL2::JUND(var.2)
MA0762.1	3.23814e-54	2.36383	0.962	0.468	2.04974e-51	ETV2
MA0025.2	6.85169e-54	2.35774	0.941	0.469	4.33712e-51	NFIL3
MA0778.1	1.16648e-53	2.61198	0.962	0.468	7.38385e-51	NFKB2
MA1466.1	2.7737e-53	1.9973	0.919	0.471	1.75575e-50	ATF6
MA0147.3	6.01225e-53	2.22881	0.935	0.449	3.80576e-50	MYC
MA0073.1	1.38811e-52	1.62576	0.946	0.447	8.78675e-50	RREB1
MA1533.1	3.53979e-52	1.97222	0.908	0.471	2.24069e-49	NR1I2
MA0684.2	5.65028e-52	2.18926	0.935	0.451	3.57663e-49	RUNX3
MA0463.2	5.02548e-51	2.14784	0.946	0.482	3.18113e-48	BCL6
MA1555.1	5.05265e-51	2.03115	0.908	0.465	3.19833e-48	RXRB(var.2)
MA0737.1	1.09265e-50	2.20305	0.908	0.467	6.9165e-48	GLIS3
MA0605.2	2.79672e-50	2.12944	0.903	0.453	1.77032e-47	ATF3
MA1149.1	4.51792e-50	2.20999	0.93	0.459	2.85985e-47	RARA::RXRG
MA1525.1	9.44967e-50	2.36825	0.93	0.444	5.98164e-47	NFATC4
MA1514.1	9.68578e-50	1.79693	0.941	0.463	6.1311e-47	KLF17
MA0464.2	1.50389e-49	2.02245	0.881	0.457	9.51963e-47	BHLHE40
MA0091.1	1.59037e-49	2.62193	0.924	0.46	1.00671e-46	TAL1::TCF3
MA0105.4	3.21897e-49	2.52018	0.941	0.462	2.03761e-46	NFKB1
MA1494.1	4.85674e-49	2.27043	0.903	0.466	3.07431e-46	HNF4A(var.2)
MA0616.2	6.09692e-49	2.17793	0.897	0.456	3.85935e-46	HES2
MA1575.1	7.62899e-49	2.3282	0.951	0.463	4.82915e-46	THRB(var.2)
MA0066.1	1.05254e-48	2.27801	0.93	0.473	6.66255e-46	PPARG
MA1587.1	1.09375e-48	1.81553	0.93	0.457	6.92345e-46	ZNF135
MA0072.1	1.25085e-48	1.8745	0.908	0.455	7.91785e-46	RORA(var.2)
MA0753.2	5.79369e-48	1.87561	0.93	0.453	3.66741e-45	ZNF740
MA0693.2	6.30741e-48	2.11675	0.892	0.472	3.99259e-45	VDR
MA0595.1	1.50742e-47	1.96464	0.93	0.481	9.54199e-45	SREBF1
MA1594.1	1.90641e-47	1.87697	0.897	0.464	1.20676e-44	ZNF382
MA0442.2	2.49319e-47	2.02699	0.924	0.456	1.57819e-44	SOX10
MA0825.1	1.06784e-46	2.14556	0.892	0.459	6.75943e-44	MNT
MA1578.1	3.4152e-46	2.11959	0.935	0.447	2.16182e-43	VEZF1
MA0760.1	4.33611e-46	2.11913	0.951	0.477	2.74475e-43	ERF
MA0696.1	1.25512e-45	1.80787	0.886	0.464	7.94491e-43	ZIC1
MA1483.1	1.25546e-45	1.6654	0.914	0.469	7.94706e-43	ELF2
MA1654.1	3.27142e-45	2.12469	0.935	0.501	2.07081e-42	ZNF16
MA0656.1	4.1928e-45	1.96627	0.876	0.454	2.65404e-42	JDP2(var.2)
MA1151.1	4.67144e-45	2.00469	0.892	0.46	2.95702e-42	RORC
MA0159.1	5.09201e-45	2.43734	0.935	0.477	3.22324e-42	RARA::RXRA
MA1484.1	8.70116e-45	1.91828	0.946	0.469	5.50783e-42	ETS2
MA1573.1	1.37172e-44	1.7663	0.914	0.475	8.68298e-42	THAP11
MA0083.3	2.77131e-44	2.02166	0.903	0.452	1.75424e-41	SRF
MA1592.1	5.63951e-44	2.37062	0.935	0.462	3.56981e-41	ZNF274
MA1579.1	6.75422e-44	2.01291	0.957	0.5	4.27542e-41	ZBTB26
MA0625.1	6.76066e-44	2.44828	0.946	0.437	4.2795e-41	NFATC3
MA1570.1	1.53876e-43	2.35218	0.897	0.444	9.74035e-41	TFAP4(var.2)
MA1548.1	2.79789e-43	1.94515	0.914	0.465	1.77107e-40	PLAGL2
MA0839.1	7.0922e-43	1.86286	0.876	0.466	4.48936e-40	CREB3L1
MA1114.1	2.2584e-42	2.13909	0.908	0.48	1.42957e-39	PBX3
MA1641.1	3.39034e-42	2.41786	0.919	0.479	2.14609e-39	MYF5
MA0794.1	3.60451e-42	1.59836	0.865	0.471	2.28166e-39	PROX1
MA1552.1	3.94083e-42	1.8565	0.914	0.477	2.49454e-39	RARB(var.3)
MA1102.2	4.35916e-42	1.46857	0.908	0.45	2.75935e-39	CTCFL
MA1601.1	5.04785e-42	2.23018	0.941	0.486	3.19529e-39	ZNF75D
MA0667.1	6.34417e-42	2.01253	0.892	0.463	4.01586e-39	MYF6
MA1553.1	1.38707e-41	1.86524	0.924	0.474	8.78013e-39	RARG(var.3)
MA0100.3	1.53178e-41	1.8417	0.881	0.468	9.69614e-39	MYB
MA0074.1	2.81154e-41	1.90127	0.881	0.468	1.7797e-38	RXRA::VDR
MA1542.1	9.04434e-41	1.61966	0.886	0.477	5.72507e-38	OSR1
MA0843.1	1.49605e-40	1.75512	0.886	0.467	9.46997e-38	TEF
MA0727.1	1.51728e-40	1.86689	0.881	0.469	9.60438e-38	NR3C2
MA0774.1	3.42051e-40	1.81278	0.859	0.466	2.16518e-37	MEIS2
MA1600.1	7.68532e-40	2.11336	0.946	0.48	4.86481e-37	ZNF684
MA0695.1	1.29006e-39	1.81279	0.854	0.469	8.16609e-37	ZBTB7C
MA0596.1	1.67955e-39	1.9175	0.914	0.476	1.06316e-36	SREBF2
MA0063.2	2.47606e-39	1.80083	0.854	0.462	1.56734e-36	NKX2-5
MA1474.1	3.09882e-39	1.80026	0.849	0.462	1.96155e-36	CREB3L4
MA0751.1	3.35308e-39	1.64594	0.892	0.467	2.1225e-36	ZIC4
MA0867.2	3.41417e-39	1.96813	0.924	0.478	2.16117e-36	SOX4
MA0738.1	4.84435e-39	1.85939	0.919	0.486	3.06647e-36	HIC2
MA0821.1	3.29876e-38	1.48663	0.892	0.459	2.08812e-35	HES5
MA0474.2	4.85585e-38	1.82672	0.951	0.479	3.07375e-35	ERG
MA1485.1	1.21028e-37	1.63601	0.886	0.48	7.66105e-35	FERD3L
MA0822.1	2.42999e-37	1.73219	0.881	0.464	1.53818e-34	HES7
MA0735.1	3.74466e-37	1.88484	0.843	0.47	2.37037e-34	GLIS1
MA0479.1	4.12031e-37	1.65079	0.892	0.475	2.60815e-34	FOXH1
MA1472.1	4.16574e-37	2.14539	0.957	0.485	2.63691e-34	BHLHA15(var.2)
MA1133.1	1.07861e-36	1.97525	0.859	0.454	6.82761e-34	JUN::JUNB(var.2)
MA1638.1	1.09133e-36	2.12597	0.914	0.466	6.90811e-34	HAND2
MA0736.1	1.11917e-36	1.84824	0.903	0.453	7.08434e-34	GLIS2
MA1421.1	3.71869e-36	1.60805	0.886	0.469	2.35393e-33	TCF7L1
MA0665.1	6.66888e-36	1.63007	0.924	0.473	4.2214e-33	MSC
MA1571.1	1.02475e-35	1.66237	0.876	0.478	6.48666e-33	TGIF2LX
MA0500.2	1.11175e-35	1.93771	0.897	0.482	7.03737e-33	MYOG
MA0697.1	1.51476e-35	1.71964	0.859	0.467	9.58846e-33	ZIC3
MA1534.1	2.05688e-35	1.76253	0.886	0.463	1.302e-32	NR1I3
MA1581.1	2.23891e-35	1.66368	0.914	0.483	1.41723e-32	ZBTB6
MA0076.2	1.05718e-34	1.13669	0.962	0.484	6.69197e-32	ELK4
MA0038.2	1.81403e-34	1.85148	0.903	0.493	1.14828e-31	GFI1
MA1139.1	3.27901e-34	1.77775	0.849	0.456	2.07562e-31	FOSL2::JUNB(var.2)
MA0471.2	4.53674e-34	1.48726	0.914	0.436	2.87176e-31	E2F6
MA1136.1	1.45678e-33	1.78111	0.838	0.461	9.22143e-31	FOSB::JUNB(var.2)
MA0781.1	1.5035e-33	1.41234	0.843	0.47	9.51714e-31	PAX9
MA1635.1	1.54369e-33	2.04069	0.946	0.493	9.77157e-31	BHLHE22(var.2)
MA0834.1	3.93789e-33	1.77833	0.849	0.463	2.49268e-30	ATF7
MA0673.1	4.65083e-33	1.68129	0.886	0.47	2.94398e-30	NKX2-8
MA0844.1	4.69112e-33	1.48756	0.859	0.466	2.96948e-30	XBP1
MA0498.2	5.4766e-33	1.5027	0.838	0.475	3.46669e-30	MEIS1
MA1572.1	6.68917e-33	1.54187	0.854	0.483	4.23424e-30	TGIF2LY
MA0672.1	1.03145e-32	1.595	0.865	0.468	6.52906e-30	NKX2-3
MA0143.4	3.3446e-32	1.52929	0.93	0.466	2.11713e-29	SOX2
MA1524.1	1.60933e-31	1.62941	0.859	0.468	1.0187e-28	MSGN1
MA0828.1	1.95541e-31	1.50582	0.854	0.47	1.23777e-28	SREBF2(var.2)
MA0865.1	3.06124e-31	1.82353	0.859	0.453	1.93777e-28	E2F8
MA0768.1	3.11191e-31	1.63431	0.865	0.468	1.96984e-28	LEF1
MA1120.1	3.78683e-31	1.59602	0.919	0.482	2.39707e-28	SOX13
MA0694.1	4.10959e-31	1.70617	0.849	0.463	2.60137e-28	ZBTB7B
MA0095.2	4.14251e-31	1.25439	0.838	0.476	2.62221e-28	YY1
MA0797.1	1.16057e-30	1.63801	0.843	0.484	7.34643e-28	TGIF2
MA1649.1	3.00126e-30	1.59999	0.914	0.484	1.8998e-27	ZBTB12
MA1468.1	3.00674e-30	1.77444	0.881	0.459	1.90326e-27	ATOH7
MA1115.1	4.01208e-30	1.45653	0.838	0.467	2.53965e-27	POU5F1
MA0138.2	4.21021e-30	1.61423	0.903	0.487	2.66506e-27	REST
MA1152.1	4.38957e-30	1.43125	0.897	0.453	2.77859e-27	SOX15
MA0113.3	6.76259e-30	1.57786	0.876	0.474	4.28072e-27	NR3C1
MA0741.1	1.00084e-29	0.970408	0.832	0.46	6.33534e-27	KLF16
MA0779.1	1.25375e-29	1.33833	0.832	0.465	7.93621e-27	PAX1
MA1596.1	1.4615e-29	0.792371	0.859	0.468	9.25127e-27	ZNF460
MA0731.1	4.17301e-29	1.7164	0.919	0.483	2.64152e-26	BCL6B
MA0638.1	6.93263e-29	1.4129	0.854	0.47	4.38836e-26	CREB3
MA0130.1	8.47799e-29	1.39918	0.897	0.482	5.36657e-26	ZNF354C
MA0639.1	2.68686e-28	1.41992	0.849	0.463	1.70078e-25	DBP
MA1127.1	4.28172e-28	1.54649	0.784	0.469	2.71033e-25	FOSB::JUN
MA1637.1	1.28667e-27	1.89597	0.946	0.499	8.14463e-25	EBF3
MA0681.2	1.35917e-27	1.3899	0.8	0.465	8.60357e-25	PHOX2B
MA1117.1	1.60448e-27	1.96429	0.914	0.485	1.01563e-24	RELB
MA0069.1	1.6721e-27	1.41599	0.865	0.478	1.05844e-24	PAX6
MA1546.1	3.18494e-27	1.21328	0.854	0.472	2.01607e-24	PAX3(var.2)
MA0525.2	3.94017e-27	-2.23661	0.038	0.472	2.49413e-24	TP63
MA1123.2	4.20971e-27	1.9158	0.924	0.462	2.66475e-24	TWIST1
MA1478.1	4.62366e-27	1.13494	0.827	0.469	2.92677e-24	DMRTA2
MA0154.4	1.98291e-26	1.76879	0.957	0.511	1.25518e-23	EBF1
MA0048.2	2.15708e-26	1.78522	0.876	0.49	1.36543e-23	NHLH1
MA1588.1	3.78946e-26	1.55285	0.908	0.469	2.39873e-23	ZNF136
MA1129.1	4.74951e-26	1.45756	0.789	0.467	3.00644e-23	FOSL1::JUN(var.2)
MA0796.1	5.05398e-26	1.41933	0.849	0.487	3.19917e-23	TGIF1
MA0152.1	7.95475e-26	1.90067	0.914	0.468	5.03536e-23	NFATC2
MA0511.2	1.13323e-25	1.29423	0.795	0.458	7.17337e-23	RUNX2
MA1099.2	2.25552e-25	1.64874	0.816	0.462	1.42774e-22	HES1
MA0106.3	2.47726e-25	0.867245	0.032	0.475	1.5681e-22	TP53
MA0627.2	3.31757e-25	1.29751	0.832	0.47	2.10002e-22	POU2F3
MA0763.1	1.51772e-24	0.966172	0.87	0.47	9.60718e-22	ETV3
MA0775.1	1.72186e-24	1.38318	0.854	0.479	1.08994e-21	MEIS3
MA1479.1	1.87457e-24	1.3519	0.843	0.474	1.1866e-21	DMRTC2
MA0698.1	3.22538e-24	1.53876	0.903	0.493	2.04167e-21	ZBTB18
MA1560.1	1.58905e-23	1.4175	0.816	0.473	1.00587e-20	SOHLH2
MA0088.2	1.74477e-23	1.35551	0.805	0.477	1.10444e-20	ZNF143
MA0861.1	4.00494e-23	1.01522	0.038	0.47	2.53513e-20	TP73
MA0783.1	8.63354e-23	1.30653	0.832	0.487	5.46503e-20	PKNOX2
MA1155.1	9.42096e-23	1.6147	0.881	0.493	5.96347e-20	ZSCAN4
MA1140.2	1.07844e-22	1.24503	0.789	0.464	6.82655e-20	JUNB(var.2)
MA0747.1	2.81155e-22	0.869912	0.822	0.472	1.77971e-19	SP8
MA0140.2	3.36384e-22	1.32079	0.805	0.479	2.12931e-19	GATA1::TAL1
MA0798.2	4.41292e-22	1.19518	0.822	0.477	2.79338e-19	RFX3
MA1584.1	6.35383e-22	1.20572	0.827	0.468	4.02198e-19	ZIC5
MA0516.2	8.08049e-22	0.891942	0.854	0.47	5.11495e-19	SP2
MA0098.3	9.02809e-22	0.525962	0.892	0.472	5.71478e-19	ETS1
MA0655.1	1.01634e-21	-5.96195	0.07	0.494	6.43344e-19	JDP2
MA1487.1	2.63102e-21	1.25277	0.832	0.486	1.66544e-18	FOXE1
MA0507.1	3.58252e-21	0.975789	0.805	0.469	2.26774e-18	POU2F2
MA1135.1	3.89425e-21	-6.64653	0.065	0.496	2.46506e-18	FOSB::JUNB
MA1138.1	4.26464e-21	-6.12685	0.065	0.497	2.69952e-18	FOSL2::JUNB
MA1144.1	6.51166e-21	-6.69412	0.054	0.495	4.12188e-18	FOSL2::JUND
MA0475.2	6.82548e-21	0.519285	0.881	0.484	4.32053e-18	FLI1
MA1132.1	9.23014e-21	-6.22059	0.097	0.495	5.84268e-18	JUN::JUNB
MA0846.1	1.44893e-20	1.20465	0.832	0.472	9.17175e-18	FOXC2
MA0491.2	1.46699e-20	-5.19604	0.081	0.497	9.28604e-18	JUND
MA1142.1	1.92262e-20	-6.61876	0.07	0.498	1.21702e-17	FOSL1::JUND
MA0767.1	3.24049e-20	1.10383	0.811	0.477	2.05123e-17	GCM2
MA0804.1	3.51987e-20	1.18826	0.778	0.479	2.22808e-17	TBX19
MA0712.2	9.19017e-20	1.31391	0.87	0.481	5.81738e-17	OTX2
MA1130.1	1.24255e-19	-7.07232	0.054	0.497	7.86536e-17	FOSL2::JUN
MA0610.1	1.30243e-19	1.07435	0.822	0.482	8.24439e-17	DMRT3
MA0758.1	2.54189e-19	1.29288	0.843	0.468	1.60902e-16	E2F7
MA1134.1	2.58034e-19	-6.53071	0.065	0.497	1.63335e-16	FOS::JUNB
MA0035.4	2.70713e-19	1.07234	0.822	0.471	1.71361e-16	GATA1
MA1137.1	4.09973e-19	-6.86461	0.07	0.497	2.59513e-16	FOSL1::JUNB
MA1651.1	4.5187e-19	1.21487	0.762	0.479	2.86034e-16	ZFP42
MA0490.2	4.63693e-19	-5.83732	0.086	0.495	2.93518e-16	JUNB
MA0099.3	4.68632e-19	-6.04808	0.081	0.498	2.96644e-16	FOS::JUN
MA1128.1	1.045e-18	-6.97196	0.07	0.498	6.61483e-16	FOSL1::JUN
MA0009.2	1.18316e-18	1.01178	0.757	0.497	7.4894e-16	TBXT
MA0162.4	1.35654e-18	0.955473	0.8	0.451	8.58692e-16	EGR1
MA0669.1	1.36336e-18	1.56196	0.822	0.47	8.63009e-16	NEUROG2
MA1480.1	1.41378e-18	1.06226	0.827	0.479	8.94925e-16	DPRX
MA0477.2	1.95812e-18	-6.21257	0.092	0.496	1.23949e-15	FOSL1
MA1568.1	2.5376e-18	1.37152	0.795	0.464	1.6063e-15	TCF21(var.2)
MA0757.1	3.5438e-18	1.09888	0.778	0.47	2.24323e-15	ONECUT3
MA1470.1	7.63937e-18	1.11283	0.757	0.477	4.83572e-15	BACH2(var.2)
MA0523.1	1.00905e-17	1.09796	0.768	0.48	6.38727e-15	TCF7L2
MA0489.1	1.02246e-17	-6.9725	0.086	0.498	6.47219e-15	JUN(var.2)
MA0715.1	1.48818e-17	1.03647	0.784	0.474	9.42018e-15	PROP1
MA0476.1	3.54693e-17	-5.28224	0.108	0.5	2.24521e-14	FOS
MA0884.1	3.69254e-17	1.2065	0.816	0.483	2.33738e-14	DUXA
MA0776.1	3.87175e-17	1.1564	0.773	0.477	2.45081e-14	MYBL1
MA1657.1	4.56573e-17	1.22113	0.838	0.468	2.89011e-14	ZNF652
MA1599.1	5.57675e-17	1.11016	0.822	0.492	3.53008e-14	ZNF682
MA1141.1	6.3093e-17	-7.07781	0.103	0.5	3.99379e-14	FOS::JUND
MA0733.1	6.60471e-17	1.36893	0.784	0.445	4.18078e-14	EGR4
MA1634.1	7.29423e-17	-6.33747	0.141	0.5	4.61725e-14	BATF
MA0156.2	8.86005e-17	0.385723	0.795	0.474	5.60841e-14	FEV
MA0462.2	1.09796e-16	-6.13444	0.135	0.499	6.95007e-14	BATF::JUN
MA1580.1	1.48128e-16	0.902808	0.784	0.49	9.37651e-14	ZBTB32
MA1521.1	2.35955e-16	1.32646	0.865	0.49	1.4936e-13	MAFA
MA0866.1	3.67129e-16	1.06194	0.838	0.488	2.32392e-13	SOX21
MA0719.1	4.02224e-16	1.35321	0.795	0.485	2.54608e-13	RHOXF1
MA0863.1	4.4008e-16	1.08644	0.811	0.481	2.78571e-13	MTF1
MA0835.2	4.61887e-16	-6.28086	0.135	0.5	2.92374e-13	BATF3
MA0829.2	6.98597e-16	0.882978	0.789	0.476	4.42212e-13	SREBF1(var.2)
MA0472.2	1.45465e-15	1.14413	0.762	0.452	9.20796e-13	EGR2
MA0478.1	2.37837e-15	-5.33647	0.124	0.498	1.50551e-12	FOSL2
MA1101.2	2.53219e-15	-5.0508	0.13	0.498	1.60287e-12	BACH2
MA0103.3	6.98863e-15	-1.95161	0.151	0.522	4.4238e-12	ZEB1
MA1520.1	8.56307e-15	1.14393	0.849	0.491	5.42043e-12	MAF
MA1547.1	1.06911e-14	1.1352	0.816	0.482	6.76744e-12	PITX2
MA0819.1	2.00308e-14	1.00323	0.773	0.476	1.26795e-11	CLOCK
MA1602.1	2.03644e-14	1.21431	0.773	0.477	1.28907e-11	ZSCAN29
MA1100.2	2.40743e-14	1.06607	0.811	0.492	1.5239e-11	ASCL1
MA0841.1	6.22972e-14	-4.80011	0.151	0.501	3.94341e-11	NFE2
MA1656.1	1.08154e-13	0.969252	0.816	0.502	6.84616e-11	ZNF449
MA0714.1	1.15276e-13	1.34594	0.8	0.486	7.29696e-11	PITX3
MA1119.1	1.17108e-13	1.181	0.789	0.485	7.41295e-11	SIX2
MA0509.2	2.52636e-13	0.851391	0.762	0.485	1.59919e-10	RFX1
MA0752.1	3.79511e-13	0.837562	0.746	0.479	2.40231e-10	ZNF410
MA1471.1	3.88337e-13	0.897886	0.735	0.488	2.45817e-10	BARX2
MA0862.1	9.09862e-13	0.775207	0.659	0.481	5.75943e-10	GMEB2
MA0032.2	9.7187e-13	0.757132	0.795	0.482	6.15194e-10	FOXC1
MA0593.1	1.68456e-12	0.837481	0.795	0.472	1.06633e-09	FOXP2
MA0037.3	2.66515e-12	1.17476	0.741	0.473	1.68704e-09	GATA3
MA1585.1	4.78183e-12	1.01673	0.751	0.492	3.0269e-09	ZKSCAN1
MA0599.1	5.1478e-12	0.563548	0.773	0.477	3.25856e-09	KLF5
MA0766.2	8.56871e-12	0.767415	0.741	0.482	5.42399e-09	GATA5
MA1143.1	1.42209e-11	1.2756	0.724	0.477	9.00184e-09	FOSL1::JUND(var.2)
MA1104.2	2.02221e-11	0.788506	0.741	0.483	1.28006e-08	GATA6
MA1475.1	2.31195e-11	0.810838	0.692	0.459	1.46346e-08	CREB3L4(var.2)
MA0259.1	2.34756e-11	0.906971	0.751	0.48	1.486e-08	ARNT::HIF1A
MA1124.1	3.2122e-11	0.906631	0.854	0.491	2.03332e-08	ZNF24
MA0845.1	3.74105e-11	0.773063	0.741	0.472	2.36809e-08	FOXB1
MA1106.1	4.21081e-11	0.866871	0.768	0.488	2.66544e-08	HIF1A
MA1562.1	7.62184e-11	0.808332	0.832	0.481	4.82462e-08	SOX14
MA0502.2	1.76335e-10	0.696573	0.768	0.492	1.1162e-07	NFYB
MA0895.1	1.95341e-10	0.813381	0.719	0.473	1.23651e-07	HMBOX1
MA0732.1	2.15766e-10	0.89822	0.735	0.454	1.3658e-07	EGR3
MA1529.1	3.19063e-10	0.977465	0.816	0.493	2.01967e-07	NHLH2
MA0597.1	4.27349e-10	0.88095	0.795	0.494	2.70512e-07	THAP1
MA0068.2	4.95788e-10	-1.02769	0.33	0.502	3.13834e-07	PAX4
MA0623.2	5.34673e-10	0.762636	0.724	0.481	3.38448e-07	NEUROG1
MA0046.2	6.32347e-10	0.876435	0.741	0.483	4.00276e-07	HNF1A
MA0510.2	6.81971e-10	0.604017	0.714	0.485	4.31688e-07	RFX5
MA0909.2	1.0341e-09	0.875349	0.768	0.478	6.54587e-07	HOXD13
MA0686.1	1.40229e-09	0.320203	0.654	0.477	8.87651e-07	SPDEF
MA1493.1	1.48974e-09	0.673161	0.741	0.48	9.43006e-07	HES6
MA0482.2	1.57566e-09	0.755647	0.692	0.479	9.97396e-07	GATA4
MA1118.1	1.72643e-09	0.79272	0.724	0.486	1.09283e-06	SIX1
MA0756.1	1.74269e-09	0.84739	0.708	0.472	1.10312e-06	ONECUT2
MA1116.1	1.81847e-09	0.872133	0.897	0.526	1.15109e-06	RBPJ
MA1564.1	3.53638e-09	0.57121	0.681	0.482	2.23853e-06	SP9
MA0827.1	3.70891e-09	0.753115	0.751	0.475	2.34774e-06	OLIG3
MA0657.1	3.75455e-09	0.703207	0.719	0.489	2.37663e-06	KLF13
MA0788.1	5.29479e-09	0.671546	0.746	0.48	3.3516e-06	POU3F3
MA0847.2	7.2632e-09	0.728187	0.735	0.474	4.5976e-06	FOXD2
MA0036.3	7.42457e-09	0.75609	0.714	0.478	4.69975e-06	GATA2
MA0678.1	9.15892e-09	0.685339	0.73	0.477	5.79759e-06	OLIG2
MA0868.2	9.16781e-09	0.763414	0.757	0.476	5.80323e-06	SOX8
MA0468.1	1.02524e-08	0.835604	0.757	0.482	6.48978e-06	DUX4
MA1648.1	1.22719e-08	-1.57101	0.211	0.532	7.76809e-06	TCF12(var.2)
MA0784.1	1.41788e-08	0.73247	0.778	0.481	8.97517e-06	POU1F1
MA1544.1	1.93597e-08	0.308117	0.697	0.469	1.22547e-05	OVOL1
MA1498.1	1.93791e-08	0.725864	0.724	0.483	1.22669e-05	HOXA7
MA1502.1	1.93791e-08	0.725864	0.724	0.483	1.22669e-05	HOXB8
MA0910.2	1.93791e-08	0.725864	0.724	0.483	1.22669e-05	HOXD8
MA0119.1	2.96823e-08	0.51258	0.87	0.509	1.87889e-05	NFIC::TLX1
MA0769.2	3.42419e-08	0.899684	0.659	0.48	2.16751e-05	TCF7
MA0646.1	3.87933e-08	0.888055	0.659	0.487	2.45561e-05	GCM1
MA0513.1	3.9055e-08	0.635536	0.784	0.502	2.47218e-05	SMAD2::SMAD3::SMAD4
MA0785.1	4.63352e-08	0.980958	0.724	0.479	2.93302e-05	POU2F1
MA0795.1	4.87214e-08	0.767051	0.73	0.486	3.08407e-05	SMAD3
MA0891.1	6.50159e-08	0.958892	0.762	0.487	4.11551e-05	GSC2
MA0759.1	1.00992e-07	0.107994	0.643	0.467	6.3928e-05	ELK3
MA0682.2	1.77527e-07	0.842313	0.741	0.492	0.000112375	PITX1
MA0875.1	1.83258e-07	0.638096	0.73	0.479	0.000116002	BARX1
MA1497.1	2.05692e-07	-0.615456	0.368	0.497	0.000130203	HOXA6
MA1631.1	2.82591e-07	-1.35302	0.276	0.524	0.00017888	ASCL1(var.2)
MA0661.1	4.19757e-07	-0.977262	0.378	0.506	0.000265706	MEOX1
MA0703.2	4.28175e-07	-0.751591	0.384	0.486	0.000271035	LMX1B
MA0702.2	5.13047e-07	-0.973471	0.4	0.483	0.000324758	LMX1A
MA0679.2	5.14414e-07	0.567112	0.714	0.479	0.000325624	ONECUT1
MA1518.1	6.01156e-07	0.615261	0.768	0.487	0.000380532	LHX1
MA0648.1	6.09732e-07	1.03155	0.762	0.486	0.000385961	GSC
MA0830.2	6.72784e-07	-1.38437	0.276	0.53	0.000425873	TCF4
MA0522.3	7.03819e-07	-1.38375	0.27	0.532	0.000445518	TCF3
MA0028.2	7.70796e-07	-0.117487	0.611	0.471	0.000487914	ELK1
MA1563.1	1.15614e-06	0.511681	0.757	0.489	0.000731835	SOX18
MA0668.1	1.74427e-06	0.708763	0.692	0.478	0.00110412	NEUROD2
MA0777.1	2.26906e-06	0.575579	0.665	0.482	0.00143632	MYBL2
MA0481.3	2.53618e-06	0.587255	0.714	0.485	0.0016054	FOXP1
MA0789.1	3.79709e-06	0.543908	0.67	0.486	0.00240356	POU3F4
MA0886.1	5.62212e-06	-0.982701	0.427	0.502	0.0035588	EMX2
MA0039.4	8.14196e-06	0.284396	0.697	0.489	0.00515386	KLF4
MA0872.1	9.62583e-06	0.728758	0.768	0.501	0.00609315	TFAP2A(var.3)
MA0674.1	1.06862e-05	-0.631785	0.373	0.499	0.00676436	NKX6-1
MA1504.1	1.10169e-05	0.539092	0.719	0.489	0.00697367	HOXC4
MA0894.1	1.1179e-05	-0.786217	0.395	0.491	0.00707633	HESX1
MA0808.1	1.21922e-05	-2.59493	0.362	0.515	0.00771768	TEAD3
MA0792.1	1.32994e-05	0.550424	0.681	0.475	0.00841854	POU5F1B
MA0644.1	1.68953e-05	-0.786119	0.395	0.491	0.0106947	ESX1
MA0890.1	1.87045e-05	-0.748909	0.378	0.498	0.0118399	GBX2
MA1506.1	2.04667e-05	-0.463035	0.427	0.484	0.0129554	HOXD10
MA0706.1	2.22816e-05	-0.838762	0.438	0.501	0.0141042	MEOX2
MA0675.1	2.63287e-05	-0.776618	0.378	0.487	0.0166661	NKX6-2
MA1512.1	2.76042e-05	0.35276	0.703	0.482	0.0174735	KLF11
MA0132.2	3.19063e-05	-0.805654	0.395	0.495	0.0201967	PDX1
MA1481.1	3.19063e-05	-0.805654	0.395	0.495	0.0201967	DRGX
MA0809.2	3.43113e-05	-2.91465	0.378	0.515	0.0217191	TEAD4
MA1489.1	3.67235e-05	0.471241	0.659	0.478	0.023246	FOXN3
MA1107.2	4.06983e-05	0.340649	0.697	0.484	0.0257621	KLF9
MA0613.1	4.30498e-05	0.672281	0.676	0.482	0.0272505	FOXG1
MA0813.1	4.60519e-05	0.621829	0.746	0.499	0.0291508	TFAP2B(var.3)
MA1633.1	5.78305e-05	-6.73293	0.438	0.513	0.0366067	BACH1
MA0077.1	7.75731e-05	0.605493	0.681	0.486	0.0491038	SOX9
MA1121.1	8.60875e-05	-2.81059	0.47	0.514	0.0544934	TEAD2
MA1105.2	0.000139858	-1.30569	0.405	0.489	0.0885301	GRHL2
MA0654.1	0.000160057	-0.789361	0.438	0.497	0.101316	ISX
MA0701.2	0.000160057	-0.789361	0.438	0.497	0.101316	LHX9
MA1549.1	0.000179586	0.496228	0.714	0.488	0.113678	POU6F1(var.2)
MA1509.1	0.000179793	0.498118	0.659	0.484	0.113809	IRF6
MA0826.1	0.000213171	0.570419	0.686	0.485	0.134937	OLIG1
MA0148.4	0.000255999	0.447791	0.659	0.486	0.162047	FOXA1
MA1561.1	0.000389046	0.587225	0.622	0.476	0.246266	SOX12
MA0651.1	0.000407715	-0.344674	0.438	0.493	0.258083	HOXC11
MA0710.1	0.000420126	-0.722199	0.422	0.494	0.26594	NOTO
MA1496.1	0.000478408	0.53523	0.703	0.489	0.302832	HOXA4
MA0658.1	0.000488554	-0.613471	0.443	0.499	0.309255	LHX6
MA0524.2	0.00049813	-1.36681	0.438	0.496	0.315316	TFAP2C
MA1519.1	0.000530853	-0.476912	0.405	0.494	0.33603	LHX5
MA0893.2	0.000571933	-0.606593	0.454	0.497	0.362034	GSX2
MA1103.2	0.000589987	0.369646	0.676	0.481	0.373462	FOXK2
MA1463.1	0.000623018	-0.624394	0.476	0.491	0.39437	ARGFX
MA0887.1	0.00063866	-0.681377	0.411	0.494	0.404272	EVX1
MA0637.1	0.000695331	0.405229	0.627	0.481	0.440145	CENPB
MA0787.1	0.000769982	0.444062	0.632	0.478	0.487398	POU3F2
MA0070.1	0.000866187	0.508108	0.616	0.496	0.548297	PBX1
MA0506.1	0.000871333	-0.499435	0.368	0.464	0.551554	NRF1
MA0818.1	0.000899965	0.453366	0.643	0.483	0.569678	BHLHE22
MA0901.2	0.00106688	0.600126	0.681	0.48	0.675336	HOXB13
MA0852.2	0.00138048	0.446658	0.611	0.485	0.873847	FOXK1
MA0820.1	0.00141465	-1.14992	0.357	0.511	0.895474	FIGLA
MA1505.1	0.00147374	-0.436133	0.454	0.488	0.932878	HOXC8
MA0642.1	0.00149455	-0.518266	0.416	0.497	0.946048	EN2
MA0815.1	0.00161812	0.583831	0.697	0.5	1	TFAP2C(var.3)
MA0877.2	0.00163854	0.333921	0.6	0.481	1	BARHL1
MA0740.1	0.00178024	0.293597	0.562	0.491	1	KLF14
MA1650.1	0.0017917	0.356617	0.605	0.458	1	ZBTB14
MA1545.1	0.00202892	-0.0232097	0.568	0.476	1	OVOL2
MA0711.1	0.00205319	0.233758	0.595	0.484	1	OTX1
MA1577.1	0.00207862	-0.748316	0.432	0.496	1	TLX2
MA0090.3	0.00227207	-2.26206	0.486	0.515	1	TEAD1
MA0635.1	0.00227934	0.731512	0.6	0.485	1	BARHL2
MA0647.1	0.00244808	-0.989446	0.432	0.491	1	GRHL1
MA1476.1	0.00247217	0.363503	0.703	0.488	1	DLX5
MA0799.1	0.00264387	0.133175	0.632	0.487	1	RFX4
MA1565.1	0.00290881	0.250243	0.638	0.506	1	TBX18
MA0812.1	0.00321021	-0.912647	0.508	0.508	1	TFAP2B(var.2)
MA0903.1	0.00328931	-0.630563	0.508	0.492	1	HOXB3
MA0031.1	0.00376219	0.327106	0.659	0.481	1	FOXD1
MA0157.2	0.00376219	0.327106	0.659	0.481	1	FOXO3
MA1683.1	0.00411809	0.377665	0.67	0.485	1	FOXA3
MA0780.1	0.00422037	0.263803	0.627	0.481	1	PAX3
MA0084.1	0.00450982	0.294332	0.681	0.481	1	SRY
MA0139.1	0.0046571	0.391356	0.686	0.463	1	CTCF
MA0914.1	0.0048105	0.448475	0.665	0.497	1	ISL2
MA0600.2	0.00496748	0.158437	0.616	0.488	1	RFX2
MA0685.1	0.00531059	0.187559	0.622	0.482	1	SP4
MA0800.1	0.00607776	0.193987	0.589	0.492	1	EOMES
MA0470.2	0.00619683	-0.387845	0.405	0.497	1	E2F4
MA0811.1	0.00626347	-1.23771	0.514	0.496	1	TFAP2B
MA1113.2	0.00643074	-0.680989	0.47	0.489	1	PBX2
MA0889.1	0.00703957	-0.446052	0.449	0.497	1	GBX1
MA1558.1	0.00710901	-1.08676	0.378	0.532	1	SNAI1
MA0810.1	0.00733126	-0.856458	0.541	0.504	1	TFAP2A(var.2)
MA0469.3	0.00783363	-0.190503	0.465	0.496	1	E2F3
MA0713.1	0.00785954	0.317093	0.654	0.485	1	PHOX2A
MA0131.2	0.00811367	0.304184	0.589	0.473	1	HINFP
MA0075.3	0.00892903	-0.515777	0.476	0.493	1	PRRX2
MA0042.2	0.00979024	0.201496	0.659	0.482	1	FOXI1
MA0033.2	0.00979024	0.201496	0.659	0.482	1	FOXL1
MA0848.1	0.00979024	0.201496	0.659	0.482	1	FOXO4
MA0849.1	0.00979024	0.201496	0.659	0.482	1	FOXO6
MA0850.1	0.00979024	0.201496	0.659	0.482	1	FOXP3
MA0699.1	0.0102199	-0.556642	0.476	0.487	1	LBX2
MA0485.2	0.0107176	-0.193795	0.438	0.494	1	HOXC9
MA0905.1	0.0117055	0.352187	0.654	0.484	1	HOXC10
MA0716.1	0.0120445	-0.568297	0.465	0.491	1	PRRX1
MA0721.1	0.0120445	-0.568297	0.465	0.491	1	UNCX
MA0158.2	0.0141165	0.370507	0.649	0.487	1	HOXA5
MA0817.1	0.0154812	0.323558	0.654	0.486	1	BHLHE23
MA1569.1	0.0182775	-0.610496	0.541	0.505	1	TFAP2E
MA0688.1	0.0194678	-0.364241	0.411	0.501	1	TBX2
MA1517.1	0.019748	-0.110868	0.627	0.484	1	KLF6
MA0805.1	0.0202386	0.092319	0.627	0.505	1	TBX1
MA0743.2	0.0219775	-0.741404	0.459	0.504	1	SCRT1
MA0904.2	0.0234544	0.255219	0.589	0.495	1	HOXB5
MA1513.1	0.0237345	0.0315125	0.573	0.472	1	KLF15
MA0030.1	0.0240401	0.248455	0.595	0.491	1	FOXF2
MA1515.1	0.0247415	-0.065276	0.595	0.484	1	KLF2
MA0612.2	0.0257144	-0.443375	0.514	0.491	1	EMX1
MA1516.1	0.0264464	-0.167765	0.6	0.482	1	KLF3
MA0003.4	0.0284689	-1.11419	0.508	0.493	1	TFAP2A
MA0153.2	0.0341681	0.61243	0.638	0.493	1	HNF1B
MA1530.1	0.0374849	0.373407	0.643	0.494	1	NKX6-3
MA1500.1	0.040463	-0.166552	0.503	0.494	1	HOXB6
MA0632.2	0.0404805	0.228629	0.638	0.463	1	TCFL5
MA0718.1	0.0413304	-0.444367	0.541	0.496	1	RAX
MA1499.1	0.0444692	0.442426	0.654	0.488	1	HOXB4
MA1507.1	0.0444692	0.442426	0.654	0.488	1	HOXD4
MA0662.1	0.0462061	-0.417422	0.497	0.488	1	MIXL1
MA0749.1	0.0483915	-0.0135568	0.541	0.486	1	ZBED1
MA0745.2	0.0490899	-1.25971	0.395	0.528	1	SNAI2
MA1554.1	0.0541317	0.170913	0.568	0.5	1	RFX7
MA1583.1	0.056827	-0.111915	0.524	0.501	1	ZFP57
MA1567.1	0.0624022	-0.10454	0.589	0.508	1	TBX6
MA0755.1	0.0661943	0.26382	0.611	0.484	1	CUX2
MA0047.3	0.067418	0.226386	0.622	0.491	1	FOXA2
MA1644.1	0.0691287	-0.531214	0.438	0.506	1	NFYC
MA1501.1	0.072066	-0.45814	0.476	0.493	1	HOXB7
MA0888.1	0.0761458	-0.371638	0.519	0.496	1	EVX2
MA0725.1	0.0802457	-0.52639	0.546	0.496	1	VSX1
MA0786.1	0.08186	0.326178	0.643	0.486	1	POU3F1
MA0878.2	0.0874282	-0.175702	0.535	0.496	1	CDX1
MA0892.1	0.0960985	-0.441531	0.497	0.495	1	GSX1
MA0594.2	0.0964176	-0.392233	0.465	0.487	1	HOXA9
MA0908.1	0.100827	0.339908	0.605	0.478	1	HOXD11
MA0746.2	0.103795	0.0978922	0.562	0.48	1	SP3
MA0024.3	0.106445	-0.12513	0.405	0.49	1	E2F1
MA0060.3	0.108469	-0.559595	0.422	0.514	1	NFYA
MA0814.2	0.111028	-0.590907	0.562	0.5	1	TFAP2C(var.2)
MA0671.1	0.123921	0.217506	0.649	0.502	1	NFIX
MA0802.1	0.130221	-0.392682	0.465	0.505	1	TBR1
MA0689.1	0.13379	0.0187446	0.562	0.5	1	TBX20
MA0465.2	0.137146	0.296857	0.632	0.479	1	CDX2
MA0722.1	0.141331	-0.302663	0.541	0.497	1	VAX1
MA0723.1	0.141331	-0.302663	0.541	0.497	1	VAX2
MA0724.1	0.141676	0.264749	0.6	0.491	1	VENTX
MA0683.1	0.148577	0.258123	0.665	0.488	1	POU4F2
MA1473.1	0.152239	-0.289077	0.535	0.492	1	CDX4
MA1527.1	0.199385	-0.829809	0.751	0.517	1	NFIC(var.2)
MA0079.4	0.2218	-0.318824	0.427	0.494	1	SP1
MA0882.1	0.222087	-0.0458236	0.632	0.492	1	DLX6
MA0744.2	0.234925	0.0914405	0.584	0.491	1	SCRT2
MA1122.1	0.235181	0.257689	0.622	0.461	1	TFDP1
MA1511.1	0.235548	-0.00536751	0.643	0.489	1	KLF10
MA0864.2	0.238952	-0.0911221	0.514	0.492	1	E2F2
MA0666.1	0.248239	0.0156589	0.568	0.497	1	MSX1
MA0708.1	0.248239	0.0156589	0.568	0.497	1	MSX2
MA0876.1	0.248239	0.0156589	0.568	0.497	1	BSX
MA1557.1	0.258986	0.00136434	0.622	0.488	1	SMAD5
MA1639.1	0.26718	0.11092	0.627	0.489	1	MEIS1(var.2)
MA1643.1	0.267808	-0.818684	0.735	0.515	1	NFIB
MA0873.1	0.275505	0.0294197	0.53	0.488	1	HOXD12
MA0630.1	0.287701	-0.421852	0.519	0.489	1	SHOX
MA0717.1	0.287701	-0.421852	0.519	0.489	1	RAX2
MA0089.2	0.339091	-2.05262	0.649	0.52	1	NFE2L1
MA0670.1	0.35152	-0.146853	0.67	0.499	1	NFIA
MA0700.2	0.354723	-0.183115	0.53	0.486	1	LHX2
MA0680.1	0.364886	0.0940342	0.605	0.483	1	PAX7
MA0913.2	0.416313	-0.181751	0.557	0.496	1	HOXD9
MA1640.1	0.427403	-0.23276	0.551	0.495	1	MEIS2(var.2)
MA0912.2	0.446213	-0.0999154	0.535	0.5	1	HOXD3
MA0501.1	0.446802	-0.716044	0.724	0.515	1	MAF::NFE2
MA0628.1	0.472745	-0.197183	0.535	0.494	1	POU6F1
MA0496.3	0.476892	-1.00551	0.703	0.509	1	MAFK
MA0634.1	0.529309	-0.171067	0.53	0.482	1	ALX3
MA0906.1	0.562566	0.241463	0.551	0.484	1	HOXC12
MA0499.2	0.57802	-0.219314	0.557	0.512	1	MYOD1
MA0754.1	0.593163	0.035072	0.541	0.486	1	CUX1
MA0790.1	0.597873	0.23933	0.605	0.494	1	POU4F1
MA1528.1	0.614012	-0.564742	0.659	0.508	1	NFIX(var.2)
MA0748.2	0.615842	-0.537283	0.411	0.48	1	YY2
MA1503.1	0.615971	-0.00714111	0.519	0.493	1	HOXB9
MA0806.1	0.619123	-0.447191	0.578	0.513	1	TBX4
MA0807.1	0.619123	-0.447191	0.578	0.513	1	TBX5
MA0527.1	0.626993	-0.0811356	0.497	0.479	1	ZBTB33
MA0801.1	0.631681	-0.328683	0.541	0.515	1	MGA
MA0803.1	0.631681	-0.328683	0.541	0.515	1	TBX15
MA0793.1	0.639032	-0.0756331	0.632	0.495	1	POU6F2
MA0650.2	0.646366	-0.0725241	0.578	0.493	1	HOXA13
MA1566.1	0.651174	-0.234077	0.541	0.51	1	TBX3
MA0145.3	0.675546	0.0027511	0.6	0.488	1	TFCP2
MA1495.1	0.725269	-0.172278	0.514	0.496	1	HOXA1
MA0900.2	0.725269	-0.172278	0.514	0.496	1	HOXA2
MA0027.2	0.749022	-0.264036	0.53	0.486	1	EN1
MA0726.1	0.775311	-0.162664	0.616	0.493	1	VSX2
MA0161.2	0.851199	-0.132115	0.67	0.504	1	NFIC
MA0899.1	0.869051	-0.0538806	0.632	0.492	1	HOXA10
MA0791.1	0.896408	0.208812	0.557	0.485	1	POU4F3
MA1559.1	0.90239	-0.649204	0.497	0.526	1	SNAI3
MA0907.1	0.934371	0.170799	0.611	0.492	1	HOXC13
MA0618.1	0.943262	-0.141528	0.584	0.482	1	LBX1
MA0902.2	0.950196	-0.074746	0.605	0.485	1	HOXB2
MA0690.1	0.993448	-0.0497163	0.508	0.499	1	TBX21
MA0707.1	0.995695	-0.138503	0.595	0.487	1	MNX1

## Sheet: Langerhans
	p_val	avg_log2FC	pct.1	pct.2	p_val_adj	gene
MA0136.2	0	2.27432	0.985	0.335	0	ELF5
MA0687.1	0	0.634793	0.987	0.165	0	SPIC
MA1508.1	0	1.62208	0.989	0.241	0	IKZF1
MA0598.3	0	-0.524914	0.995	0.272	0	EHF
MA0473.3	0	1.64989	0.987	0.322	0	ELF1
MA0640.2	0	0.238738	0.991	0.269	0	ELF3
MA0764.2	0	1.91815	0.978	0.289	0	ETV4
MA0062.3	0	1.77573	0.987	0.339	0	GABPA
MA0080.5	0	0.639126	0.987	0.162	0	SPI1
MA0081.2	0	0.499244	0.991	0.167	0	SPIB
MA0645.1	0	2.50853	0.987	0.388	0	ETV6
MA0517.1	0	2.23852	0.958	0.301	8.11377e-307	STAT1::STAT2
MA1652.1	3.60397e-304	2.35864	0.947	0.306	2.28131e-301	ZKSCAN5
MA0050.2	2.58419e-293	2.05175	0.958	0.328	1.63579e-290	IRF1
MA0761.2	4.75323e-290	1.83882	0.975	0.351	3.0088e-287	ETV1
MA1418.1	8.99946e-242	1.61284	0.938	0.342	5.69666e-239	IRF3
MA1111.1	4.49021e-211	1.56251	0.902	0.337	2.8423e-208	NR2F2
MA0160.1	3.92437e-181	1.62912	0.877	0.365	2.48413e-178	NR4A2
MA0653.1	8.7069e-160	2.05304	0.875	0.41	5.51147e-157	IRF9
MA0149.1	1.79002e-159	1.36608	0.9	0.389	1.13309e-156	EWSR1-FLI1
MA0526.3	4.75679e-159	1.03099	0.868	0.361	3.01105e-156	USF2
MA0017.2	4.6493e-158	1.62853	0.866	0.374	2.94301e-155	NR2F1
MA0641.1	2.19058e-156	1.85155	0.931	0.424	1.38664e-153	ELF4
MA0652.1	6.69395e-155	2.33187	0.875	0.397	4.23727e-152	IRF8
MA1647.1	9.02668e-154	1.55431	0.866	0.378	5.71389e-151	PRDM4
MA0692.1	2.86017e-152	1.8005	0.869	0.37	1.81049e-149	TFEB
MA1112.2	1.34815e-151	1.31492	0.869	0.368	8.53381e-149	NR4A1
MA0093.3	3.77481e-149	1.41029	0.86	0.37	2.38946e-146	USF1
MA0831.2	1.1603e-147	1.61004	0.862	0.371	7.34468e-145	TFE3
MA0620.3	1.64138e-147	1.62511	0.846	0.375	1.03899e-144	MITF
MA0107.1	4.27857e-145	2.23035	0.875	0.418	2.70833e-142	RELA
MA0592.3	1.22333e-141	1.74487	0.846	0.389	7.74368e-139	ESRRA
MA0141.3	1.97537e-141	1.55636	0.851	0.381	1.25041e-138	ESRRB
MA0051.1	6.32477e-140	1.88293	0.833	0.396	4.00358e-137	IRF2
MA0101.1	2.53085e-133	1.74765	0.869	0.424	1.60203e-130	REL
MA1632.1	2.28621e-132	1.38218	0.857	0.396	1.44717e-129	ATF2
MA1419.1	2.62413e-130	2.14329	0.851	0.419	1.66107e-127	IRF4
MA0855.1	1.14434e-128	1.50898	0.848	0.409	7.24369e-126	RXRB
MA1540.1	2.74207e-128	1.29524	0.846	0.396	1.73573e-125	NR5A1
MA0018.4	1.03098e-121	1.39064	0.838	0.393	6.52611e-119	CREB1
MA0856.1	1.12654e-120	1.39697	0.837	0.409	7.13098e-118	RXRG
MA0765.2	2.04412e-119	1.5069	0.917	0.438	1.29393e-116	ETV5
MA1535.1	3.33875e-119	1.25647	0.846	0.407	2.11343e-116	NR2C1
MA0163.1	1.70619e-117	1.18497	0.824	0.41	1.08002e-114	PLAG1
MA1653.1	5.5114e-115	0.878024	0.838	0.403	3.48871e-112	ZNF148
MA0871.2	9.63567e-114	1.51575	0.817	0.401	6.09938e-111	TFEC
MA1536.1	1.82198e-112	1.1762	0.828	0.399	1.15332e-109	NR2C2(var.2)
MA1537.1	3.85476e-112	1.36948	0.848	0.414	2.44006e-109	NR2F1(var.2)
MA0057.1	1.57465e-111	1.26424	0.833	0.414	9.96752e-109	MZF1(var.2)
MA1574.1	1.08043e-108	1.37072	0.826	0.408	6.83911e-106	THRB
MA0508.3	9.97088e-107	1.21812	0.829	0.424	6.31157e-104	PRDM1
MA1110.1	1.86192e-106	1.46955	0.817	0.422	1.1786e-103	NR1H4
MA0838.1	5.10129e-106	1.81177	0.837	0.418	3.22911e-103	CEBPG
MA0497.1	6.95997e-106	1.18511	0.82	0.41	4.40566e-103	MEF2C
MA1541.1	7.94332e-106	1.58702	0.802	0.416	5.02812e-103	NR6A1
MA1550.1	6.75208e-104	1.23834	0.828	0.421	4.27406e-101	PPARD
MA1420.1	8.8321e-100	1.66801	0.806	0.434	5.59072e-97	IRF5
MA0056.2	2.19603e-98	1.28268	0.811	0.426	1.39009e-95	MZF1
MA0115.1	2.46143e-97	1.27649	0.804	0.408	1.55808e-94	NR1H2::RXRA
MA0772.1	1.94164e-95	1.49229	0.784	0.416	1.22906e-92	IRF7
MA0488.1	2.8809e-94	1.31953	0.815	0.42	1.82361e-91	JUN
MA1522.1	3.19669e-91	0.928094	0.829	0.425	2.0235e-88	MAZ
MA0052.4	9.7963e-90	1.02935	0.8	0.424	6.20106e-87	MEF2A
MA1491.1	1.18881e-89	1.29735	0.779	0.423	7.52514e-87	GLI3
MA0837.1	1.84178e-89	1.54876	0.809	0.425	1.16585e-86	CEBPE
MA0112.3	2.09981e-87	1.22702	0.797	0.425	1.32918e-84	ESR1
MA0729.1	5.08931e-87	1.21421	0.808	0.425	3.22154e-84	RARA
MA0484.2	2.69849e-85	1.23441	0.809	0.434	1.70814e-82	HNF4G
MA0762.1	2.76426e-85	0.961589	0.886	0.438	1.74978e-82	ETV2
MA1484.1	9.98299e-84	1.15706	0.855	0.441	6.31923e-81	ETS2
MA1154.1	2.25199e-83	1.2615	0.8	0.433	1.42551e-80	ZNF282
MA0773.1	6.485e-83	1.01958	0.78	0.418	4.105e-80	MEF2D
MA0105.4	1.07746e-82	1.2917	0.802	0.441	6.8203e-80	NFKB1
MA0660.1	2.04518e-82	1.04062	0.806	0.421	1.2946e-79	MEF2B
MA0760.1	4.6578e-82	1.08601	0.878	0.448	2.94839e-79	ERF
MA1148.1	4.88507e-82	1.34166	0.766	0.431	3.09225e-79	PPARA::RXRA
MA1464.1	7.06985e-82	1.43629	0.744	0.418	4.47522e-79	ARNT2
MA0504.1	3.47202e-81	1.07572	0.793	0.42	2.19779e-78	NR2C2
MA0492.1	7.65699e-80	1.08082	0.791	0.425	4.84687e-77	JUND(var.2)
MA0609.2	1.2304e-78	1.18584	0.762	0.433	7.78842e-76	CREM
MA0636.1	6.56929e-78	1.61345	0.75	0.426	4.15836e-75	BHLHE41
MA0114.4	7.09838e-78	1.17636	0.802	0.435	4.49327e-75	HNF4A
MA0014.3	7.69848e-78	1.12536	0.77	0.432	4.87314e-75	PAX5
MA0466.2	7.98467e-78	1.42597	0.808	0.44	5.0543e-75	CEBPB
MA0750.2	2.65928e-77	0.956352	0.851	0.447	1.68333e-74	ZBTB7A
MA0137.3	3.80645e-77	0.87203	0.806	0.422	2.40948e-74	STAT1
MA0684.2	2.01595e-74	1.31429	0.764	0.432	1.2761e-71	RUNX3
MA1483.1	2.44242e-74	1.10431	0.846	0.442	1.54605e-71	ELF2
MA0258.2	2.82482e-73	1.15033	0.8	0.437	1.78811e-70	ESR2
MA0778.1	4.85205e-73	1.127	0.779	0.451	3.07135e-70	NFKB2
MA0059.1	7.52222e-73	1.22804	0.782	0.433	4.76157e-70	MAX::MYC
MA1125.1	1.52755e-72	0.755499	0.784	0.442	9.66937e-70	ZNF384
MA0734.2	4.36692e-72	1.18081	0.744	0.438	2.76426e-69	GLI2
MA0073.1	5.6758e-72	0.983896	0.755	0.43	3.59278e-69	RREB1
MA1556.1	1.60364e-71	1.12763	0.797	0.442	1.0151e-68	RXRG(var.2)
MA1531.1	5.33587e-71	1.08281	0.797	0.449	3.37761e-68	NR1D1
MA1532.1	1.21151e-70	1.16262	0.779	0.444	7.66888e-68	NR1D2
MA1131.1	2.09697e-70	1.12874	0.755	0.435	1.32738e-67	FOSL2::JUN(var.2)
MA1538.1	2.86416e-70	1.01459	0.77	0.43	1.81301e-67	NR2F1(var.3)
MA1145.1	5.15405e-70	1.19329	0.748	0.427	3.26251e-67	FOSL2::JUND(var.2)
MA0525.2	9.16e-70	-6.23263	0.065	0.503	5.79828e-67	TP63
MA0155.1	6.59314e-69	1.04348	0.78	0.445	4.17346e-66	INSM1
MA1576.1	6.62142e-69	1.16452	0.793	0.441	4.19136e-66	THRB(var.3)
MA0663.1	5.7995e-68	1.23824	0.751	0.428	3.67108e-65	MLX
MA0464.2	7.91866e-68	1.40596	0.722	0.442	5.01251e-65	BHLHE40
MA0474.2	6.36032e-67	0.734905	0.846	0.454	4.02608e-64	ERG
MA0753.2	9.45723e-67	0.885433	0.77	0.435	5.98643e-64	ZNF740
MA0528.2	9.65802e-66	0.819462	0.788	0.45	6.11353e-63	ZNF263
MA0664.1	1.52008e-64	1.2378	0.735	0.425	9.62208e-62	MLXIPL
MA0836.2	5.36809e-63	1.19058	0.782	0.476	3.398e-60	CEBPD
MA1146.1	1.22807e-62	1.09955	0.773	0.433	7.77368e-60	NR1H4::RXRA
MA1597.1	1.72685e-62	0.9614	0.784	0.464	1.09309e-59	ZNF528
MA0106.3	2.16295e-62	-8.36345	0.067	0.507	1.36915e-59	TP53
MA0071.1	3.50184e-62	1.14014	0.726	0.426	2.21666e-59	RORA
MA0486.2	2.9607e-61	0.974216	0.77	0.44	1.87412e-58	HSF1
MA1589.1	2.76047e-60	1.06423	0.748	0.452	1.74738e-57	ZNF140
MA0102.4	1.42927e-59	1.00109	0.773	0.476	9.04728e-57	CEBPA
MA1539.1	1.16147e-58	1.17749	0.731	0.444	7.35209e-56	NR2F6(var.3)
MA0861.1	1.92862e-58	-8.43437	0.06	0.502	1.22082e-55	TP73
MA0605.2	2.08976e-58	1.11417	0.704	0.441	1.32282e-55	ATF3
MA1126.1	2.81895e-58	1.0134	0.735	0.429	1.78439e-55	FOS::JUN(var.2)
MA0656.1	2.13966e-57	1.07365	0.713	0.44	1.3544e-54	JDP2(var.2)
MA0771.1	1.10785e-56	1.01361	0.75	0.451	7.01266e-54	HSF4
MA0770.1	7.02757e-55	0.831316	0.759	0.442	4.44845e-52	HSF2
MA0144.2	9.39413e-55	0.730799	0.773	0.463	5.94649e-52	STAT3
MA0833.2	1.51363e-54	0.853398	0.766	0.449	9.58126e-52	ATF4
MA0730.1	2.48776e-54	0.924477	0.76	0.447	1.57475e-51	RARA(var.2)
MA0511.2	2.92971e-54	0.912678	0.751	0.437	1.85451e-51	RUNX2
MA1555.1	3.70506e-54	1.06392	0.726	0.451	2.3453e-51	RXRB(var.2)
MA1636.1	3.22448e-53	0.73794	0.784	0.47	2.0411e-50	CEBPG(var.2)
MA0066.1	1.61383e-52	1.0913	0.737	0.46	1.02156e-49	PPARG
MA0659.2	4.31102e-52	0.948582	0.73	0.431	2.72887e-49	MAFG
MA0076.2	1.08129e-51	0.409498	0.849	0.459	6.84458e-49	ELK4
MA0103.3	5.63085e-51	-2.11812	0.191	0.547	3.56433e-48	ZEB1
MA1514.1	1.45675e-50	0.776617	0.721	0.452	9.2212e-48	KLF17
MA1494.1	7.46895e-50	1.03983	0.735	0.451	4.72784e-47	HNF4A(var.2)
MA0058.3	1.63871e-49	1.15692	0.699	0.441	1.0373e-46	MAX
MA1133.1	1.64911e-49	0.972691	0.715	0.439	1.04389e-46	JUN::JUNB(var.2)
MA1117.1	6.36944e-49	1.01768	0.751	0.47	4.03186e-46	RELB
MA1147.1	6.77215e-49	0.871335	0.73	0.44	4.28677e-46	NR4A2::RXRA
MA0104.4	4.22773e-48	1.00681	0.693	0.449	2.67615e-45	MYCN
MA1149.1	6.85484e-48	0.886059	0.735	0.445	4.33911e-45	RARA::RXRG
MA1578.1	1.26483e-47	0.894416	0.719	0.434	8.00637e-45	VEZF1
MA1642.1	1.56631e-47	1.05134	0.726	0.449	9.91477e-45	NEUROG2(var.2)
MA1592.1	2.66086e-47	0.935397	0.722	0.45	1.68432e-44	ZNF274
MA1467.1	6.13736e-47	0.794635	0.742	0.459	3.88495e-44	ATOH1(var.2)
MA1466.1	7.33294e-47	0.985972	0.728	0.458	4.64175e-44	ATF6
MA0655.1	1.48004e-46	-8.76072	0.073	0.527	9.36868e-44	JDP2
MA1593.1	1.75271e-46	0.931524	0.75	0.447	1.10947e-43	ZNF317
MA0736.1	1.85649e-46	0.880658	0.739	0.436	1.17516e-43	GLIS2
MA1109.1	2.22237e-46	1.03303	0.728	0.45	1.40676e-43	NEUROD1
MA1150.1	2.43867e-45	0.949931	0.724	0.446	1.54368e-42	RORB
MA1552.1	2.62616e-45	0.834111	0.713	0.466	1.66236e-42	RARB(var.3)
MA0691.1	2.62661e-45	0.799223	0.735	0.458	1.66264e-42	TFAP4
MA1108.2	5.44411e-45	0.845919	0.755	0.461	3.44612e-42	MXI1
MA1646.1	5.68942e-45	0.852789	0.746	0.462	3.6014e-42	OSR2
MA0091.1	6.17105e-45	0.735342	0.733	0.446	3.90628e-42	TAL1::TCF3
MA1570.1	1.77161e-44	1.16684	0.708	0.431	1.12143e-41	TFAP4(var.2)
MA1600.1	7.7559e-44	0.845484	0.744	0.467	4.90948e-41	ZNF684
MA1523.1	3.77865e-43	0.913853	0.737	0.448	2.39189e-40	MSANTD3
MA0741.1	5.72527e-43	0.595068	0.693	0.447	3.62409e-40	KLF16
MA0782.2	9.55304e-43	0.798777	0.724	0.46	6.04707e-40	PKNOX1
MA1468.1	1.17073e-42	0.987622	0.706	0.446	7.41072e-40	ATOH7
MA0673.1	1.55274e-42	0.919394	0.71	0.458	9.82882e-40	NKX2-8
MA0491.2	2.29918e-42	-8.46154	0.098	0.528	1.45538e-39	JUND
MA0834.1	4.47021e-42	0.902229	0.701	0.45	2.82964e-39	ATF7
MA1138.1	1.28014e-41	-9.29297	0.093	0.528	8.10326e-39	FOSL2::JUNB
MA1144.1	1.46155e-41	-9.31943	0.096	0.525	9.25163e-39	FOSL2::JUND
MA0495.3	1.62664e-41	0.781723	0.704	0.441	1.02966e-38	MAFF
MA1132.1	1.98876e-41	-7.75283	0.109	0.526	1.25889e-38	JUN::JUNB
MA0490.2	3.95315e-41	-8.53006	0.082	0.528	2.50234e-38	JUNB
MA1135.1	5.34756e-41	-9.49675	0.1	0.526	3.38501e-38	FOSB::JUNB
MA0147.3	5.41401e-41	0.86691	0.702	0.438	3.42707e-38	MYC
MA1553.1	5.61e-41	0.784408	0.726	0.462	3.55113e-38	RARG(var.3)
MA1151.1	6.55007e-41	0.95786	0.688	0.451	4.14619e-38	RORC
MA1142.1	1.36523e-40	-9.03001	0.098	0.528	8.64188e-38	FOSL1::JUND
MA1648.1	3.094e-40	-1.6144	0.241	0.554	1.9585e-37	TCF12(var.2)
MA0842.2	5.00629e-40	0.876266	0.679	0.458	3.16898e-37	NRL
MA1139.1	6.05184e-40	1.0217	0.675	0.446	3.83081e-37	FOSL2::JUNB(var.2)
MA0475.2	1.83512e-39	0.370425	0.775	0.465	1.16163e-36	FLI1
MA1136.1	1.99809e-39	0.92893	0.681	0.45	1.26479e-36	FOSB::JUNB(var.2)
MA0737.1	2.21707e-39	0.804521	0.697	0.457	1.40341e-36	GLIS3
MA1594.1	3.29935e-39	0.90262	0.704	0.453	2.08849e-36	ZNF382
MA1655.1	4.25666e-39	0.786494	0.735	0.474	2.69446e-36	ZNF341
MA1575.1	7.59306e-39	0.864127	0.713	0.453	4.80641e-36	THRB(var.2)
MA1525.1	1.30064e-38	0.594734	0.728	0.43	8.23308e-36	NFATC4
MA0043.3	1.78604e-38	0.75225	0.724	0.466	1.13056e-35	HLF
MA0763.1	7.3646e-38	0.41779	0.748	0.453	4.66179e-35	ETV3
MA1134.1	1.31178e-37	-9.32521	0.105	0.527	8.30358e-35	FOS::JUNB
MA0074.1	1.62513e-37	0.808373	0.697	0.457	1.02871e-34	RXRA::VDR
MA0063.2	1.65024e-37	0.765945	0.686	0.451	1.0446e-34	NKX2-5
MA1641.1	2.60501e-37	0.659476	0.731	0.466	1.64897e-34	MYF5
MA1579.1	7.62542e-37	0.635544	0.742	0.489	4.82689e-34	ZBTB26
MA1548.1	1.69232e-36	0.70047	0.715	0.453	1.07124e-33	PLAGL2
MA1645.1	1.93102e-36	0.72821	0.715	0.46	1.22234e-33	NKX2-2
MA1130.1	3.92037e-36	-9.48418	0.105	0.526	2.48159e-33	FOSL2::JUN
MA1654.1	4.04868e-36	0.5643	0.74	0.49	2.56281e-33	ZNF16
MA0649.1	4.41852e-36	0.783728	0.708	0.441	2.79692e-33	HEY2
MA0696.1	4.88355e-36	0.655217	0.704	0.452	3.09129e-33	ZIC1
MA1137.1	5.22753e-36	-9.18753	0.113	0.526	3.30902e-33	FOSL1::JUNB
MA0025.2	5.6038e-36	0.63552	0.713	0.459	3.54721e-33	NFIL3
MA0083.3	7.64929e-36	0.839977	0.67	0.444	4.842e-33	SRF
MA0099.3	9.13721e-36	-9.29453	0.123	0.526	5.78385e-33	FOS::JUN
MA0159.1	1.30284e-35	0.527434	0.739	0.464	8.24695e-33	RARA::RXRA
MA0522.3	1.5227e-35	-1.39479	0.258	0.554	9.63867e-33	TCF3
MA1128.1	1.6697e-35	-9.46927	0.109	0.527	1.05692e-32	FOSL1::JUN
MA0156.2	2.00878e-35	0.331994	0.726	0.457	1.27156e-32	FEV
MA0100.3	2.14889e-35	0.803973	0.726	0.454	1.36025e-32	MYB
MA0638.1	3.61498e-35	0.829594	0.675	0.461	2.28829e-32	CREB3
MA0843.1	1.07656e-34	0.80312	0.699	0.456	6.8146e-32	TEF
MA0781.1	1.18623e-34	0.878868	0.675	0.46	7.50884e-32	PAX9
MA1546.1	1.49006e-34	0.798571	0.681	0.463	9.43206e-32	PAX3(var.2)
MA0477.2	1.57116e-34	-9.64175	0.109	0.526	9.94545e-32	FOSL1
MA0489.1	2.33865e-34	-10.434	0.1	0.529	1.48037e-31	JUN(var.2)
MA1631.1	2.86299e-34	-1.49602	0.252	0.547	1.81228e-31	ASCL1(var.2)
MA1601.1	2.05229e-33	0.515589	0.739	0.474	1.2991e-30	ZNF75D
MA0471.2	2.73241e-33	0.443592	0.684	0.425	1.72962e-30	E2F6
MA1114.1	3.49436e-33	0.615939	0.728	0.467	2.21193e-30	PBX3
MA0751.1	6.79745e-33	0.641093	0.699	0.456	4.30279e-30	ZIC4
MA0098.3	7.56295e-33	0.271747	0.762	0.454	4.78735e-30	ETS1
MA0476.1	1.17227e-32	-9.22865	0.114	0.53	7.42047e-30	FOS
MA0779.1	1.75152e-32	0.731698	0.688	0.453	1.10872e-29	PAX1
MA1474.1	3.86531e-32	0.737126	0.699	0.449	2.44674e-29	CREB3L4
MA1101.2	9.57558e-32	-7.44215	0.129	0.528	6.06134e-29	BACH2
MA0823.1	1.37026e-31	0.648519	0.675	0.441	8.67377e-29	HEY1
MA1542.1	1.94396e-31	0.684155	0.691	0.468	1.23053e-28	OSR1
MA0830.2	2.01405e-31	-1.41263	0.267	0.552	1.27489e-28	TCF4
MA1524.1	2.17214e-31	0.767686	0.666	0.46	1.37497e-28	MSGN1
MA0839.1	5.64565e-31	0.668041	0.672	0.457	3.5737e-28	CREB3L1
MA1141.1	6.30396e-31	-9.94008	0.129	0.529	3.99041e-28	FOS::JUND
MA1129.1	6.93284e-31	0.897426	0.655	0.458	4.38849e-28	FOSL1::JUN(var.2)
MA0844.1	7.24194e-31	0.810454	0.673	0.457	4.58415e-28	XBP1
MA0794.1	1.01464e-30	0.75381	0.695	0.46	6.42265e-28	PROX1
MA1634.1	1.47773e-30	-8.61801	0.129	0.53	9.35405e-28	BATF
MA1140.2	1.64397e-30	0.946552	0.677	0.451	1.04063e-27	JUNB(var.2)
MA0442.2	2.14162e-30	0.608589	0.679	0.449	1.35564e-27	SOX10
MA0596.1	2.39063e-30	0.628843	0.713	0.466	1.51327e-27	SREBF2
MA0462.2	2.63875e-30	-8.47116	0.127	0.529	1.67033e-27	BATF::JUN
MA1573.1	3.69171e-30	0.570841	0.704	0.465	2.33685e-27	THAP11
MA0154.4	3.72892e-30	0.435617	0.762	0.498	2.36041e-27	EBF1
MA0625.1	4.69276e-30	0.412431	0.693	0.427	2.97052e-27	NFATC3
MA0835.2	7.78711e-30	-8.21585	0.142	0.528	4.92924e-27	BATF3
MA0516.2	1.29727e-29	0.490877	0.675	0.461	8.21172e-27	SP2
MA0616.2	1.31884e-29	0.678455	0.653	0.45	8.34825e-27	HES2
MA0825.1	3.56847e-29	0.795608	0.673	0.45	2.25884e-26	MNT
MA0068.2	1.74822e-28	-1.0269	0.299	0.519	1.10662e-25	PAX4
MA0478.1	2.53904e-28	-9.52961	0.127	0.528	1.60721e-25	FOSL2
MA0727.1	8.25049e-28	0.910994	0.666	0.462	5.22256e-25	NR3C2
MA1533.1	1.06497e-27	0.634747	0.688	0.463	6.74128e-25	NR1I2
MA1485.1	1.81385e-27	0.645466	0.702	0.47	1.14816e-24	FERD3L
MA0841.1	4.35994e-27	-7.35241	0.152	0.529	2.75984e-24	NFE2
MA0867.2	6.91491e-27	0.414217	0.704	0.468	4.37714e-24	SOX4
MA0695.1	8.61842e-27	0.644054	0.666	0.461	5.45546e-24	ZBTB7C
MA1637.1	1.83092e-26	0.34571	0.717	0.491	1.15897e-23	EBF3
MA0747.1	3.36392e-26	0.439884	0.653	0.464	2.12936e-23	SP8
MA1127.1	6.87318e-26	0.717483	0.67	0.457	4.35072e-23	FOSB::JUN
MA0865.1	1.51776e-25	0.664094	0.67	0.443	9.6074e-23	E2F8
MA0639.1	2.0965e-25	0.690491	0.646	0.457	1.32709e-22	DBP
MA0463.2	7.90762e-25	0.481424	0.691	0.476	5.00552e-22	BCL6
MA1638.1	9.17663e-25	0.507204	0.681	0.458	5.8088e-22	HAND2
MA1472.1	1.42378e-24	0.62478	0.69	0.479	9.0125e-22	BHLHA15(var.2)
MA0768.1	1.91131e-24	0.540971	0.677	0.459	1.20986e-21	LEF1
MA1102.2	2.08272e-24	0.477164	0.659	0.444	1.31836e-21	CTCFL
MA1123.2	2.82004e-24	0.405937	0.673	0.456	1.78509e-21	TWIST1
MA0693.2	2.88867e-24	0.518703	0.673	0.465	1.82853e-21	VDR
MA0595.1	4.68612e-24	0.556869	0.686	0.474	2.96631e-21	SREBF1
MA1587.1	9.63004e-24	0.282512	0.679	0.449	6.09582e-21	ZNF135
MA0697.1	1.58624e-23	0.450209	0.677	0.457	1.00409e-20	ZIC3
MA0500.2	1.64077e-23	0.602473	0.677	0.476	1.03861e-20	MYOG
MA0143.4	3.20946e-23	0.441243	0.679	0.459	2.03159e-20	SOX2
MA1120.1	5.41489e-23	0.360339	0.701	0.473	3.42763e-20	SOX13
MA0738.1	7.8509e-23	0.439751	0.693	0.478	4.96962e-20	HIC2
MA0828.1	7.89937e-23	0.712924	0.652	0.464	5.0003e-20	SREBF2(var.2)
MA1581.1	1.06291e-22	0.493448	0.693	0.475	6.72825e-20	ZBTB6
MA0694.1	1.20145e-22	0.625176	0.644	0.457	7.60521e-20	ZBTB7B
MA0072.1	1.7976e-22	0.824644	0.639	0.452	1.13788e-19	RORA(var.2)
MA1115.1	6.34634e-22	0.646577	0.624	0.463	4.01723e-19	POU5F1
MA1558.1	8.80025e-22	-1.41541	0.323	0.551	5.57056e-19	SNAI1
MA0498.2	1.05978e-21	0.578898	0.632	0.47	6.70844e-19	MEIS1
MA0688.1	2.65982e-21	-0.731032	0.356	0.515	1.68366e-18	TBX2
MA1105.2	3.27875e-21	-1.92951	0.278	0.511	2.07545e-18	GRHL2
MA0774.1	3.51666e-21	0.643845	0.646	0.46	2.22604e-18	MEIS2
MA0667.1	2.35891e-20	0.480802	0.635	0.459	1.49319e-17	MYF6
MA0862.1	4.93e-20	0.57977	0.641	0.469	3.12069e-17	GMEB2
MA0647.1	5.38145e-20	-1.67139	0.316	0.51	3.40646e-17	GRHL1
MA1534.1	7.18458e-20	0.362012	0.639	0.459	4.54784e-17	NR1I3
MA0088.2	1.57587e-19	0.501554	0.648	0.47	9.97528e-17	ZNF143
MA1571.1	1.69751e-19	0.64926	0.655	0.473	1.07453e-16	TGIF2LX
MA0758.1	1.91319e-19	0.569182	0.617	0.465	1.21105e-16	E2F7
MA0479.1	2.2419e-19	0.650383	0.653	0.47	1.41912e-16	FOXH1
MA0703.2	2.79608e-19	-0.91491	0.338	0.5	1.76992e-16	LMX1B
MA0808.1	3.49201e-19	-4.40761	0.247	0.541	2.21044e-16	TEAD3
MA0797.1	5.53243e-19	0.542248	0.655	0.478	3.50203e-16	TGIF2
MA0745.2	7.35986e-19	-1.35077	0.328	0.546	4.65879e-16	SNAI2
MA0820.1	9.36237e-19	-1.4517	0.332	0.526	5.92638e-16	FIGLA
MA0113.3	2.11349e-18	0.71084	0.635	0.471	1.33784e-15	NR3C1
MA1478.1	2.98152e-18	0.509479	0.644	0.462	1.8873e-15	DMRTA2
MA0731.1	3.03442e-18	0.158918	0.679	0.478	1.92079e-15	BCL6B
MA1099.2	4.02088e-18	0.492421	0.613	0.459	2.54522e-15	HES1
MA0665.1	5.63013e-18	0.503357	0.635	0.472	3.56387e-15	MSC
MA1519.1	6.00094e-18	-0.851346	0.339	0.509	3.7986e-15	LHX5
MA1479.1	1.21554e-17	0.498692	0.653	0.467	7.69435e-15	DMRTC2
MA0674.1	1.56577e-17	-0.852685	0.354	0.511	9.91134e-15	NKX6-1
MA0702.2	2.08484e-17	-1.03579	0.318	0.5	1.31971e-14	LMX1A
MA0661.1	4.36312e-17	-1.08571	0.383	0.516	2.76186e-14	MEOX1
MA0735.1	5.56006e-17	0.497839	0.641	0.464	3.51952e-14	GLIS1
MA0796.1	6.97026e-17	0.505544	0.659	0.481	4.41217e-14	TGIF1
MA0654.1	7.3303e-17	-0.973599	0.336	0.514	4.64008e-14	ISX
MA0701.2	7.3303e-17	-0.973599	0.336	0.514	4.64008e-14	LHX9
MA0038.2	9.34769e-17	0.164439	0.664	0.489	5.91709e-14	GFI1
MA1121.1	1.448e-16	-3.92501	0.249	0.544	9.16584e-14	TEAD2
MA1584.1	2.3067e-16	0.387203	0.621	0.464	1.46014e-13	ZIC5
MA0706.1	2.46904e-16	-1.04525	0.354	0.516	1.5629e-13	MEOX2
MA1635.1	2.6775e-16	0.341847	0.672	0.489	1.69485e-13	BHLHE22(var.2)
MA0776.1	2.98445e-16	0.610216	0.626	0.471	1.88916e-13	MYBL1
MA1649.1	2.99603e-16	0.272056	0.673	0.479	1.89649e-13	ZBTB12
MA0669.1	3.31394e-16	0.475864	0.628	0.465	2.09772e-13	NEUROG2
MA1421.1	3.83898e-16	0.59553	0.623	0.468	2.43007e-13	TCF7L1
MA0162.4	4.46287e-16	0.31089	0.619	0.445	2.825e-13	EGR1
MA0502.2	6.19606e-16	0.378856	0.659	0.483	3.92211e-13	NFYB
MA0675.1	6.20642e-16	-0.904303	0.343	0.5	3.92866e-13	NKX6-2
MA0599.1	1.0461e-15	0.268041	0.644	0.469	6.62179e-13	KLF5
MA1577.1	1.25692e-15	-0.822713	0.354	0.511	7.9563e-13	TLX2
MA0809.2	1.3976e-15	-4.10819	0.258	0.541	8.84683e-13	TEAD4
MA0681.2	4.59289e-15	0.375859	0.639	0.457	2.9073e-12	PHOX2B
MA0095.2	5.86911e-15	0.514904	0.613	0.474	3.71515e-12	YY1
MA0821.1	7.34827e-15	0.32288	0.617	0.458	4.65146e-12	HES5
MA0822.1	1.01688e-14	0.470922	0.63	0.461	6.43683e-12	HES7
MA0672.1	1.19232e-14	0.406697	0.626	0.465	7.54737e-12	NKX2-3
MA1572.1	1.99154e-14	0.521134	0.633	0.48	1.26064e-11	TGIF2LY
MA1657.1	2.18145e-14	0.437052	0.632	0.464	1.38086e-11	ZNF652
MA1475.1	3.58785e-14	0.685284	0.57	0.456	2.27111e-11	CREB3L4(var.2)
MA0138.2	1.07979e-13	0.342587	0.648	0.485	6.83504e-11	REST
MA0152.1	1.12045e-13	-0.0538942	0.653	0.464	7.09247e-11	NFATC2
MA0894.1	1.31205e-13	-0.927287	0.348	0.505	8.30526e-11	HESX1
MA1143.1	1.90818e-13	0.446671	0.633	0.469	1.20788e-10	FOSL1::JUND(var.2)
MA0610.1	1.95451e-13	0.446759	0.639	0.477	1.23721e-10	DMRT3
MA0075.3	2.50807e-13	-0.89193	0.358	0.509	1.58761e-10	PRRX2
MA0890.1	3.36274e-13	-0.840109	0.39	0.506	2.12862e-10	GBX2
MA1568.1	3.55984e-13	0.317635	0.621	0.459	2.25338e-10	TCF21(var.2)
MA0887.1	4.86882e-13	-0.850026	0.343	0.509	3.08196e-10	EVX1
MA0507.1	5.29225e-13	0.467462	0.586	0.468	3.34999e-10	POU2F2
MA0627.2	8.96905e-13	0.501393	0.593	0.47	5.67741e-10	POU2F3
MA0069.1	9.80346e-13	0.548275	0.61	0.477	6.20559e-10	PAX6
MA0698.1	1.10906e-12	0.265588	0.657	0.49	7.02033e-10	ZBTB18
MA0472.2	1.1585e-12	0.355593	0.608	0.446	7.33328e-10	EGR2
MA0658.1	1.21728e-12	-0.970344	0.367	0.513	7.70537e-10	LHX6
MA0140.2	1.57511e-12	0.60057	0.623	0.475	9.97044e-10	GATA1::TAL1
MA0759.1	1.61453e-12	0.144467	0.599	0.459	1.022e-09	ELK3
MA1651.1	1.8032e-12	0.418493	0.603	0.476	1.14143e-09	ZFP42
MA0690.1	2.08436e-12	-0.634518	0.361	0.515	1.3194e-09	TBX21
MA1113.2	2.65317e-12	-1.11849	0.347	0.505	1.67946e-09	PBX2
MA0886.1	2.94131e-12	-1.12356	0.348	0.517	1.86185e-09	EMX2
MA1463.1	5.12176e-12	-0.851941	0.367	0.505	3.24207e-09	ARGFX
MA0048.2	5.66888e-12	0.258721	0.632	0.489	3.5884e-09	NHLH1
MA0716.1	5.95403e-12	-0.830057	0.376	0.503	3.7689e-09	PRRX1
MA0721.1	5.95403e-12	-0.830057	0.376	0.503	3.7689e-09	UNCX
MA0725.1	7.93337e-12	-1.07274	0.359	0.515	5.02182e-09	VSX1
MA1560.1	8.8653e-12	0.433966	0.597	0.471	5.61174e-09	SOHLH2
MA0802.1	9.19988e-12	-0.550505	0.374	0.519	5.82352e-09	TBR1
MA1588.1	1.04128e-11	0.292175	0.613	0.469	6.59133e-09	ZNF136
MA1633.1	1.12026e-11	-7.8526	0.274	0.539	7.09122e-09	BACH1
MA0470.2	1.80318e-11	-0.443368	0.383	0.507	1.14141e-08	E2F4
MA0090.3	2.97424e-11	-3.63453	0.296	0.54	1.8827e-08	TEAD1
MA1152.1	3.09016e-11	0.302011	0.615	0.451	1.95607e-08	SOX15
MA0743.2	3.73687e-11	-0.989483	0.381	0.517	2.36544e-08	SCRT1
MA0775.1	5.92636e-11	0.369762	0.617	0.477	3.75138e-08	MEIS3
MA1497.1	7.02793e-11	-0.871587	0.354	0.509	4.44868e-08	HOXA6
MA0030.1	8.09361e-11	-0.565709	0.381	0.509	5.12326e-08	FOXF2
MA0767.1	1.09405e-10	0.409854	0.588	0.477	6.92532e-08	GCM2
MA0699.1	1.22095e-10	-0.818578	0.367	0.502	7.72858e-08	LBX2
MA1544.1	1.54907e-10	0.327218	0.579	0.465	9.80563e-08	OVOL1
MA1155.1	1.95625e-10	0.283359	0.63	0.492	1.23831e-07	ZSCAN4
MA1599.1	3.01149e-10	0.153099	0.646	0.487	1.90628e-07	ZNF682
MA0710.1	3.39258e-10	-0.878305	0.377	0.505	2.1475e-07	NOTO
MA1559.1	3.51501e-10	-1.04529	0.376	0.543	2.225e-07	SNAI3
MA1116.1	3.73638e-10	-0.191349	0.661	0.525	2.36513e-07	RBPJ
MA0630.1	5.83642e-10	-0.682927	0.374	0.504	3.69446e-07	SHOX
MA0717.1	5.83642e-10	-0.682927	0.374	0.504	3.69446e-07	RAX2
MA0524.2	5.93623e-10	-1.79221	0.356	0.511	3.75764e-07	TFAP2C
MA0733.1	9.28689e-10	0.223468	0.581	0.443	5.8786e-07	EGR4
MA1569.1	1.2693e-09	-1.13154	0.381	0.522	8.03465e-07	TFAP2E
MA0783.1	1.32041e-09	0.279242	0.633	0.484	8.35821e-07	PKNOX2
MA0506.1	1.5544e-09	-0.535957	0.341	0.475	9.83933e-07	NRF1
MA0662.1	1.93717e-09	-0.711092	0.388	0.501	1.22623e-06	MIXL1
MA0806.1	2.01362e-09	-0.88781	0.387	0.53	1.27462e-06	TBX4
MA0807.1	2.01362e-09	-0.88781	0.387	0.53	1.27462e-06	TBX5
MA0623.2	2.37416e-09	0.392125	0.581	0.479	1.50284e-06	NEUROG1
MA0913.2	2.84506e-09	-0.79537	0.367	0.514	1.80093e-06	HOXD9
MA0812.1	3.04353e-09	-1.42975	0.405	0.52	1.92655e-06	TFAP2B(var.2)
MA0893.2	4.01376e-09	-0.828332	0.374	0.51	2.54071e-06	GSX2
MA0798.2	7.2602e-09	0.414186	0.586	0.478	4.59571e-06	RFX3
MA0715.1	8.43279e-09	0.228688	0.592	0.472	5.33796e-06	PROP1
MA0594.2	1.53131e-08	-0.370671	0.394	0.497	9.6932e-06	HOXA9
MA1564.1	1.61875e-08	0.192091	0.592	0.477	1.02467e-05	SP9
MA1473.1	1.86672e-08	-0.763328	0.405	0.504	1.18163e-05	CDX4
MA0644.1	1.98901e-08	-0.841459	0.388	0.5	1.25904e-05	ESX1
MA0028.2	2.08001e-08	-0.0684234	0.572	0.465	1.31665e-05	ELK1
MA0810.1	3.51957e-08	-1.23584	0.365	0.522	2.22789e-05	TFAP2A(var.2)
MA0037.3	3.65861e-08	0.447233	0.563	0.473	2.3159e-05	GATA3
MA1656.1	4.46554e-08	-0.0288074	0.632	0.5	2.82669e-05	ZNF449
MA0814.2	4.9795e-08	-1.0679	0.381	0.517	3.15203e-05	TFAP2C(var.2)
MA0650.2	7.85142e-08	-0.820362	0.401	0.508	4.96995e-05	HOXA13
MA0657.1	9.04979e-08	0.249098	0.584	0.487	5.72852e-05	KLF13
MA0132.2	1.48414e-07	-0.782076	0.383	0.504	9.39463e-05	PDX1
MA1481.1	1.48414e-07	-0.782076	0.383	0.504	9.39463e-05	DRGX
MA0700.2	1.89818e-07	-0.667101	0.414	0.497	0.000120155	LHX2
MA0811.1	2.26301e-07	-1.70378	0.379	0.511	0.000143249	TFAP2B
MA0689.1	2.41556e-07	-0.470458	0.414	0.513	0.000152905	TBX20
MA0003.4	2.51346e-07	-1.6527	0.367	0.509	0.000159102	TFAP2A
MA0752.1	3.71921e-07	0.286675	0.592	0.476	0.000235426	ZNF410
MA0804.1	5.50364e-07	0.321444	0.581	0.479	0.00034838	TBX19
MA0651.1	5.8629e-07	-0.422089	0.417	0.5	0.000371122	HOXC11
MA0791.1	6.13729e-07	-0.608861	0.405	0.498	0.00038849	POU4F3
MA0618.1	6.66919e-07	-0.73744	0.405	0.496	0.00042216	LBX1
MA0819.1	6.73525e-07	0.419816	0.568	0.477	0.000426341	CLOCK
MA0744.2	7.75296e-07	-0.756791	0.414	0.504	0.000490762	SCRT2
MA1119.1	8.08684e-07	0.121476	0.588	0.485	0.000511897	SIX2
MA0903.1	1.09387e-06	-0.961239	0.381	0.506	0.000692419	HOXB3
MA0084.1	1.17743e-06	-0.469945	0.416	0.497	0.000745313	SRY
MA0042.2	1.22816e-06	-0.369474	0.417	0.497	0.000777426	FOXI1
MA0033.2	1.22816e-06	-0.369474	0.417	0.497	0.000777426	FOXL1
MA0848.1	1.22816e-06	-0.369474	0.417	0.497	0.000777426	FOXO4
MA0849.1	1.22816e-06	-0.369474	0.417	0.497	0.000777426	FOXO6
MA0850.1	1.22816e-06	-0.369474	0.417	0.497	0.000777426	FOXP3
MA0714.1	1.36334e-06	0.0690008	0.593	0.486	0.000862991	PITX3
MA0878.2	1.49602e-06	-0.676644	0.421	0.507	0.000946979	CDX1
MA0892.1	1.56743e-06	-0.716696	0.399	0.507	0.000992183	GSX1
MA1104.2	2.43906e-06	0.289482	0.57	0.483	0.00154392	GATA6
MA1602.1	2.7992e-06	0.20741	0.568	0.478	0.00177189	ZSCAN29
MA0784.1	3.75205e-06	0.231052	0.57	0.482	0.00237505	POU1F1
MA0035.4	4.09782e-06	0.259034	0.568	0.473	0.00259392	GATA1
MA0888.1	4.48255e-06	-0.686829	0.39	0.509	0.00283746	EVX2
MA1100.2	5.08583e-06	0.0374085	0.595	0.492	0.00321933	ASCL1
MA0130.1	5.49493e-06	0.0158416	0.579	0.488	0.00347829	ZNF354C
MA1583.1	5.68538e-06	-0.371997	0.439	0.509	0.00359885	ZFP57
MA0749.1	5.98063e-06	0.227464	0.577	0.477	0.00378574	ZBED1
MA0827.1	6.9733e-06	0.230546	0.563	0.476	0.0044141	OLIG3
MA1506.1	7.82928e-06	-0.509148	0.385	0.494	0.00495593	HOXD10
MA0801.1	1.01121e-05	-0.782238	0.423	0.527	0.00640099	MGA
MA0803.1	1.01121e-05	-0.782238	0.423	0.527	0.00640099	TBX15
MA1565.1	1.13259e-05	-0.532653	0.436	0.52	0.00716931	TBX18
MA1683.1	1.15752e-05	-0.349827	0.408	0.501	0.00732709	FOXA3
MA1562.1	1.22179e-05	0.0078608	0.588	0.482	0.0077339	SOX14
MA1528.1	1.49111e-05	-2.19329	0.387	0.529	0.00943875	NFIX(var.2)
MA1505.1	1.56688e-05	-0.461659	0.414	0.496	0.00991836	HOXC8
MA0642.1	1.74334e-05	-0.460595	0.392	0.506	0.0110354	EN2
MA0482.2	1.76661e-05	0.597165	0.563	0.477	0.0111826	GATA4
MA0719.1	1.87746e-05	0.00282635	0.577	0.486	0.0118843	RHOXF1
MA0079.4	2.48255e-05	-0.379694	0.417	0.5	0.0157145	SP1
MA1566.1	2.5299e-05	-0.664014	0.423	0.522	0.0160143	TBX3
MA0884.1	2.60577e-05	0.120516	0.568	0.486	0.0164945	DUXA
MA0722.1	2.92416e-05	-0.805565	0.419	0.508	0.0185099	VAX1
MA0723.1	2.92416e-05	-0.805565	0.419	0.508	0.0185099	VAX2
MA1567.1	3.79817e-05	-0.605612	0.434	0.521	0.0240424	TBX6
MA0510.2	4.04117e-05	0.223985	0.57	0.484	0.0255806	RFX5
MA1512.1	4.4596e-05	0.0911547	0.559	0.482	0.0282293	KLF11
MA0047.3	5.16249e-05	-0.388989	0.416	0.505	0.0326786	FOXA2
MA0889.1	6.31637e-05	-0.610991	0.423	0.504	0.0399826	GBX1
MA0732.1	6.78237e-05	0.0799076	0.572	0.451	0.0429324	EGR3
MA1103.2	6.97335e-05	-0.326745	0.425	0.495	0.0441413	FOXK2
MA0678.1	7.01667e-05	0.206862	0.564	0.477	0.0444155	OLIG2
MA0912.2	7.10221e-05	-0.661016	0.443	0.508	0.044957	HOXD3
MA0863.1	8.02511e-05	0.351494	0.574	0.483	0.050799	MTF1
MA0634.1	8.43418e-05	-0.522591	0.41	0.493	0.0533884	ALX3
MA0785.1	9.16703e-05	0.195635	0.541	0.482	0.0580273	POU2F1
MA1644.1	9.19996e-05	-0.166851	0.434	0.512	0.0582358	NFYC
MA0712.2	9.3899e-05	-0.0205177	0.577	0.485	0.059438	OTX2
MA1640.1	9.68129e-05	-0.813535	0.423	0.506	0.0612826	MEIS2(var.2)
MA0766.2	9.74891e-05	0.140258	0.564	0.483	0.0617106	GATA5
MA0671.1	0.000119192	-1.19172	0.43	0.517	0.0754488	NFIX
MA0628.1	0.000128001	-0.476197	0.43	0.503	0.0810244	POU6F1
MA1501.1	0.000131278	-0.576855	0.428	0.5	0.0830991	HOXB7
MA0523.1	0.000137043	0.209231	0.559	0.483	0.0867484	TCF7L2
MA1639.1	0.000183463	-0.827211	0.421	0.502	0.116132	MEIS1(var.2)
MA0612.2	0.000207771	-0.565246	0.426	0.499	0.131519	EMX1
MA1500.1	0.000213286	-0.426563	0.434	0.501	0.13501	HOXB6
MA0139.1	0.000242501	0.268928	0.517	0.466	0.153503	CTCF
MA0895.1	0.000257452	0.283878	0.534	0.476	0.162967	HMBOX1
MA1547.1	0.000316977	-0.040815	0.581	0.483	0.200646	PITX2
MA0899.1	0.000345664	-0.572362	0.441	0.503	0.218806	HOXA10
MA0499.2	0.00044183	-0.645161	0.459	0.52	0.279678	MYOD1
MA0852.2	0.000466676	-0.359141	0.445	0.495	0.295406	FOXK1
MA1516.1	0.000487341	-0.679785	0.417	0.494	0.308487	KLF3
MA0882.1	0.000494863	-0.550234	0.425	0.505	0.313248	DLX6
MA1480.1	0.000548104	0.238119	0.539	0.486	0.34695	DPRX
MA0036.3	0.000741481	0.303492	0.55	0.478	0.469358	GATA2
MA0648.1	0.000783584	0.00854106	0.572	0.487	0.496008	GSC
MA0891.1	0.000876857	0.0859767	0.554	0.49	0.555051	GSC2
MA0789.1	0.00089671	0.241793	0.546	0.486	0.567617	POU3F4
MA1529.1	0.000995749	-0.201715	0.575	0.496	0.630309	NHLH2
MA0496.3	0.00116455	-2.3894	0.441	0.525	0.737162	MAFK
MA0726.1	0.00117529	-0.660966	0.437	0.504	0.743957	VSX2
MA0829.2	0.00122172	-0.141788	0.559	0.478	0.773346	SREBF1(var.2)
MA0805.1	0.00123451	-0.653719	0.446	0.517	0.781447	TBX1
MA0024.3	0.00132408	-0.223885	0.436	0.493	0.838142	E2F1
MA0485.2	0.00155947	-0.283407	0.45	0.497	0.987146	HOXC9
MA0868.2	0.00160978	-0.138661	0.559	0.477	1	SOX8
MA0873.1	0.00166417	-0.217525	0.441	0.495	1	HOXD12
MA0740.1	0.00173026	0.0602164	0.555	0.486	1	KLF14
MA1643.1	0.00186792	-2.27116	0.436	0.533	1	NFIB
MA0161.2	0.00209315	-1.60107	0.437	0.519	1	NFIC
MA1118.1	0.0021119	0.00910377	0.539	0.489	1	SIX1
MA0685.1	0.00211385	0.0745538	0.543	0.481	1	SP4
MA0795.1	0.00230802	0.127985	0.555	0.488	1	SMAD3
MA1107.2	0.00250404	-0.0431971	0.563	0.483	1	KLF9
MA0826.1	0.00254966	0.150816	0.554	0.485	1	OLIG1
MA0597.1	0.00258422	-0.0860071	0.546	0.499	1	THAP1
MA0089.2	0.00269175	-3.33053	0.43	0.536	1	NFE2L1
MA0039.4	0.0027044	0.00773782	0.564	0.488	1	KLF4
MA0509.2	0.0027627	0.1676	0.568	0.486	1	RFX1
MA0031.1	0.00277444	-0.233507	0.452	0.492	1	FOXD1
MA0157.2	0.00277444	-0.233507	0.452	0.492	1	FOXO3
MA0060.3	0.00285185	-0.236418	0.426	0.521	1	NFYA
MA1585.1	0.00342928	0.0146091	0.561	0.494	1	ZKSCAN1
MA0790.1	0.00414845	-0.434319	0.448	0.504	1	POU4F1
MA0757.1	0.00505651	0.151815	0.512	0.477	1	ONECUT3
MA1545.1	0.00509024	0.0578411	0.512	0.475	1	OVOL2
MA0769.2	0.00511273	0.279989	0.555	0.478	1	TCF7
MA0469.3	0.00539846	-0.184172	0.434	0.503	1	E2F3
MA0009.2	0.00540447	0.146374	0.55	0.501	1	TBXT
MA0666.1	0.00597777	-0.369826	0.45	0.505	1	MSX1
MA0708.1	0.00597777	-0.369826	0.45	0.505	1	MSX2
MA0876.1	0.00597777	-0.369826	0.45	0.505	1	BSX
MA0872.1	0.00609626	-0.165084	0.581	0.502	1	TFAP2A(var.3)
MA1124.1	0.00682924	-0.283923	0.577	0.495	1	ZNF24
MA0901.2	0.00695069	-0.416008	0.428	0.495	1	HOXB13
MA0148.4	0.00730181	-0.291016	0.452	0.497	1	FOXA1
MA1499.1	0.00746718	-0.459764	0.457	0.498	1	HOXB4
MA1507.1	0.00746718	-0.459764	0.457	0.498	1	HOXD4
MA0813.1	0.00747915	-0.263707	0.563	0.502	1	TFAP2B(var.3)
MA1580.1	0.00777227	-0.0220034	0.552	0.494	1	ZBTB32
MA1470.1	0.00800322	0.289273	0.543	0.48	1	BACH2(var.2)
MA0748.2	0.0096904	-0.605548	0.436	0.483	1	YY2
MA1509.1	0.0102615	0.182303	0.519	0.487	1	IRF6
MA0800.1	0.0105114	-0.300688	0.459	0.499	1	EOMES
MA0027.2	0.0118261	-0.480385	0.445	0.493	1	EN1
MA0637.1	0.0126394	0.271244	0.528	0.481	1	CENPB
MA0792.1	0.0135828	0.168557	0.515	0.478	1	POU5F1B
MA0668.1	0.0152875	0.025104	0.552	0.478	1	NEUROD2
MA0680.1	0.0158758	-0.363357	0.446	0.493	1	PAX7
MA0683.1	0.0159789	-0.490613	0.454	0.499	1	POU4F2
MA1596.1	0.0161365	-0.0348443	0.566	0.472	1	ZNF460
MA1495.1	0.0164388	-0.431777	0.454	0.502	1	HOXA1
MA0900.2	0.0164388	-0.431777	0.454	0.502	1	HOXA2
MA1554.1	0.0190195	-0.155253	0.456	0.508	1	RFX7
MA0866.1	0.0198191	0.0400347	0.541	0.496	1	SOX21
MA0670.1	0.0217195	-1.19609	0.452	0.512	1	NFIA
MA0793.1	0.0217522	-0.509761	0.459	0.505	1	POU6F2
MA0777.1	0.0241994	0.119605	0.53	0.483	1	MYBL2
MA0465.2	0.0251491	-0.221626	0.452	0.489	1	CDX2
MA0718.1	0.0276924	-0.53607	0.465	0.501	1	RAX
MA0686.1	0.0293561	-0.151172	0.541	0.476	1	SPDEF
MA0153.2	0.0293592	-0.302043	0.454	0.503	1	HNF1B
MA0707.1	0.0311859	-0.479349	0.474	0.493	1	MNX1
MA0907.1	0.0334205	-0.340411	0.468	0.5	1	HOXC13
MA0679.2	0.0334799	-0.221357	0.454	0.491	1	ONECUT1
MA0501.1	0.0364008	-2.24817	0.463	0.53	1	MAF::NFE2
MA0613.1	0.0402875	-0.280571	0.448	0.494	1	FOXG1
MA0908.1	0.0422745	0.187957	0.512	0.48	1	HOXD11
MA0131.2	0.0466669	0.0272696	0.439	0.482	1	HINFP
MA1511.1	0.0568609	-0.172247	0.521	0.491	1	KLF10
MA0600.2	0.0610819	0.0505609	0.53	0.488	1	RFX2
MA0847.2	0.0643095	-0.411433	0.465	0.486	1	FOXD2
MA0711.1	0.0690875	-0.141131	0.45	0.493	1	OTX1
MA1515.1	0.0693587	-0.393291	0.465	0.491	1	KLF2
MA0481.3	0.074662	-0.184716	0.474	0.495	1	FOXP1
MA1487.1	0.0964173	-0.29324	0.554	0.491	1	FOXE1
MA1561.1	0.101054	0.0332285	0.515	0.477	1	SOX12
MA0788.1	0.107837	0.0530459	0.519	0.486	1	POU3F3
MA1471.1	0.155905	-0.0412339	0.552	0.491	1	BARX2
MA0682.2	0.159749	-0.157344	0.55	0.495	1	PITX1
MA1496.1	0.177074	-0.0601312	0.528	0.493	1	HOXA4
MA0902.2	0.177617	-0.512229	0.477	0.491	1	HOXB2
MA1530.1	0.181265	-0.266818	0.472	0.503	1	NKX6-3
MA0724.1	0.18348	-0.00242337	0.548	0.488	1	VENTX
MA1527.1	0.191062	-1.88413	0.472	0.532	1	NFIC(var.2)
MA0845.1	0.197904	-0.0573776	0.512	0.478	1	FOXB1
MA0875.1	0.204368	-0.214918	0.497	0.487	1	BARX1
MA1498.1	0.206164	-0.0853744	0.537	0.486	1	HOXA7
MA1502.1	0.206164	-0.0853744	0.537	0.486	1	HOXB8
MA0910.2	0.206164	-0.0853744	0.537	0.486	1	HOXD8
MA1521.1	0.209375	-0.427557	0.525	0.501	1	MAFA
MA0145.3	0.209487	-0.700317	0.468	0.495	1	TFCP2
MA1476.1	0.229769	-0.348453	0.554	0.489	1	DLX5
MA0818.1	0.240431	-0.0147287	0.51	0.486	1	BHLHE22
MA0914.1	0.249526	-0.170246	0.497	0.503	1	ISL2
MA0905.1	0.25373	0.0663714	0.51	0.488	1	HOXC10
MA1518.1	0.256938	-0.293428	0.519	0.494	1	LHX1
MA0754.1	0.269772	-0.0318815	0.47	0.49	1	CUX1
MA1493.1	0.306078	-0.0233651	0.512	0.486	1	HES6
MA1504.1	0.31795	-0.287128	0.472	0.5	1	HOXC4
MA0632.2	0.318718	-0.144415	0.463	0.47	1	TCFL5
MA0158.2	0.334668	-0.261387	0.445	0.499	1	HOXA5
MA0906.1	0.34746	-0.182859	0.497	0.485	1	HOXC12
MA1517.1	0.350628	-0.486199	0.492	0.489	1	KLF6
MA0593.1	0.366054	-0.0705469	0.523	0.479	1	FOXP2
MA0513.1	0.371664	-0.643207	0.525	0.511	1	SMAD2::SMAD3::SMAD4
MA0259.1	0.390755	-0.0293307	0.488	0.49	1	ARNT::HIF1A
MA0817.1	0.406887	0.162038	0.519	0.488	1	BHLHE23
MA0646.1	0.41482	-0.143645	0.519	0.49	1	GCM1
MA0787.1	0.424166	0.0357415	0.485	0.483	1	POU3F2
MA1489.1	0.424849	-0.18926	0.477	0.486	1	FOXN3
MA0799.1	0.440561	0.00832289	0.497	0.492	1	RFX4
MA1549.1	0.444988	-0.161373	0.517	0.493	1	POU6F1(var.2)
MA0468.1	0.448209	-0.107799	0.515	0.489	1	DUX4
MA1557.1	0.478656	-0.258359	0.474	0.495	1	SMAD5
MA0119.1	0.50344	-1.18986	0.554	0.518	1	NFIC::TLX1
MA1650.1	0.50454	-0.0546486	0.494	0.46	1	ZBTB14
MA0815.1	0.517119	-0.374441	0.526	0.505	1	TFAP2C(var.3)
MA0746.2	0.518178	-0.0772993	0.512	0.479	1	SP3
MA1563.1	0.540006	-0.175115	0.501	0.498	1	SOX18
MA0904.2	0.545183	-0.174562	0.483	0.5	1	HOXB5
MA0527.1	0.607646	-0.126352	0.49	0.478	1	ZBTB33
MA1520.1	0.624081	-0.449423	0.523	0.502	1	MAF
MA0864.2	0.631663	-0.107275	0.477	0.495	1	E2F2
MA1513.1	0.641572	-0.10697	0.485	0.475	1	KLF15
MA0046.2	0.655914	-0.0574892	0.485	0.493	1	HNF1A
MA1106.1	0.682485	-0.0688968	0.497	0.498	1	HIF1A
MA0786.1	0.695992	-0.0398299	0.486	0.492	1	POU3F1
MA0846.1	0.754244	-0.19193	0.51	0.482	1	FOXC2
MA0780.1	0.763273	-0.142944	0.474	0.488	1	PAX3
MA0756.1	0.772148	0.0103578	0.475	0.481	1	ONECUT2
MA0877.2	0.772199	0.0172718	0.494	0.484	1	BARHL1
MA0909.2	0.774388	-0.204252	0.515	0.485	1	HOXD13
MA0070.1	0.784417	-0.061546	0.521	0.498	1	PBX1
MA0077.1	0.784628	-0.401857	0.503	0.492	1	SOX9
MA1503.1	0.81561	-0.0177972	0.497	0.493	1	HOXB9
MA0713.1	0.849036	-0.24412	0.495	0.491	1	PHOX2A
MA1122.1	0.849076	-0.04248	0.485	0.465	1	TFDP1
MA0032.2	0.877474	-0.157809	0.505	0.492	1	FOXC1
MA0635.1	0.896347	-0.0618236	0.503	0.488	1	BARHL2
MA0755.1	0.96991	0.000179617	0.472	0.491	1	CUX2

## Sheet: Fibroblast
	p_val	avg_log2FC	pct.1	pct.2	p_val_adj	gene
MA1559.1	1.27452e-188	-4.58597	0	0.544	8.06768e-186	SNAI3
MA1558.1	5.72403e-184	-4.63221	0	0.547	3.62331e-181	SNAI1
MA0522.3	4.40168e-172	-4.12756	0	0.542	2.78626e-169	TCF3
MA1648.1	1.08795e-171	-4.26627	0	0.54	6.88675e-169	TCF12(var.2)
MA0745.2	3.30964e-171	-4.50603	0	0.543	2.095e-168	SNAI2
MA0830.2	4.81535e-163	-4.03149	0.005	0.541	3.04812e-160	TCF4
MA1631.1	4.00286e-154	-3.88545	0.005	0.535	2.53381e-151	ASCL1(var.2)
MA0103.3	3.00235e-142	-4.21035	0.005	0.528	1.90049e-139	ZEB1
MA0806.1	2.87443e-118	-3.23793	0.043	0.533	1.81952e-115	TBX4
MA0807.1	2.87443e-118	-3.23793	0.043	0.533	1.81952e-115	TBX5
MA1566.1	2.83843e-112	-3.05499	0.022	0.53	1.79673e-109	TBX3
MA1567.1	2.39088e-111	-3.06969	0.054	0.529	1.51343e-108	TBX6
MA0499.2	1.41198e-104	-3.0896	0.038	0.531	8.9378e-102	MYOD1
MA0820.1	2.95089e-104	-3.45615	0.038	0.523	1.86791e-101	FIGLA
MA1513.1	4.83725e-104	2.02776	0.941	0.458	3.06198e-101	KLF15
MA0801.1	1.77927e-102	-3.14923	0.038	0.533	1.12628e-99	MGA
MA0803.1	1.77927e-102	-3.14923	0.038	0.533	1.12628e-99	TBX15
MA0805.1	6.28173e-98	-2.75608	0.07	0.526	3.97634e-95	TBX1
MA1122.1	1.07027e-80	2.17163	0.871	0.452	6.7748e-78	TFDP1
MA0152.1	3.65314e-78	2.73674	0.962	0.466	2.31244e-75	NFATC2
MA0829.2	8.87873e-74	-2.44778	0.038	0.504	5.62024e-71	SREBF1(var.2)
MA1565.1	6.14277e-72	-2.17172	0.065	0.528	3.88837e-69	TBX18
MA0471.2	1.14796e-70	1.72621	0.935	0.435	7.26656e-68	E2F6
MA0506.1	8.45651e-64	2.26663	0.887	0.445	5.35297e-61	NRF1
MA0625.1	1.04986e-60	2.55933	0.914	0.438	6.64561e-58	NFATC3
MA1650.1	1.35883e-60	1.88498	0.898	0.447	8.60137e-58	ZBTB14
MA0732.1	9.221e-60	1.89189	0.887	0.448	5.8369e-57	EGR3
MA0632.2	3.06429e-59	2.13134	0.866	0.455	1.9397e-56	TCFL5
MA1525.1	8.24333e-59	2.36709	0.93	0.444	5.21803e-56	NFATC4
MA0800.1	1.16957e-58	-1.75394	0.108	0.51	7.40337e-56	EOMES
MA0743.2	4.98799e-58	-2.33926	0.091	0.518	3.1574e-55	SCRT1
MA0802.1	6.49966e-56	-1.88166	0.129	0.518	4.11429e-53	TBR1
MA0690.1	3.11385e-55	-1.85937	0.108	0.514	1.97107e-52	TBX21
MA1587.1	2.50638e-54	-1.87161	0.091	0.488	1.58654e-51	ZNF135
MA0162.4	1.42197e-53	1.4125	0.866	0.448	9.00109e-51	EGR1
MA1653.1	1.2445e-50	1.1913	0.914	0.432	7.87769e-48	ZNF148
MA0744.2	2.84267e-50	-2.01217	0.108	0.509	1.79941e-47	SCRT2
MA0600.2	3.10928e-50	1.85348	0.828	0.48	1.96817e-47	RFX2
MA0783.1	1.14604e-47	-1.8963	0.14	0.513	7.25444e-45	PKNOX2
MA0510.2	3.2187e-47	1.8406	0.833	0.48	2.03744e-44	RFX5
MA0688.1	1.46628e-45	-1.63473	0.145	0.511	9.28158e-43	TBX2
MA0131.2	2.54716e-44	1.67336	0.849	0.463	1.61235e-41	HINFP
MA0689.1	2.29871e-42	-1.57747	0.177	0.514	1.45509e-39	TBX20
MA0084.1	4.17676e-42	1.63091	0.876	0.474	2.64389e-39	SRY
MA0593.1	8.46763e-39	1.6045	0.871	0.469	5.36001e-36	FOXP2
MA1102.2	7.55268e-37	1.32673	0.796	0.454	4.78085e-34	CTCFL
MA0782.2	1.10933e-36	-1.79795	0.151	0.501	7.02203e-34	PKNOX1
MA0595.1	1.11091e-36	-1.85825	0.145	0.51	7.03205e-34	SREBF1
MA0137.3	1.46946e-36	1.62382	0.909	0.446	9.3017e-34	STAT1
MA0148.4	4.73366e-35	1.47169	0.828	0.479	2.99641e-32	FOXA1
MA1123.2	1.45656e-33	2.81179	0.839	0.465	9.22001e-31	TWIST1
MA0527.1	9.20865e-32	1.3957	0.823	0.467	5.82908e-29	ZBTB33
MA0613.1	4.14981e-31	1.49912	0.849	0.475	2.62683e-28	FOXG1
MA0733.1	4.53397e-31	1.34241	0.785	0.445	2.87001e-28	EGR4
MA0042.2	1.23611e-30	1.38565	0.796	0.477	7.82456e-28	FOXI1
MA0033.2	1.23611e-30	1.38565	0.796	0.477	7.82456e-28	FOXL1
MA0848.1	1.23611e-30	1.38565	0.796	0.477	7.82456e-28	FOXO4
MA0849.1	1.23611e-30	1.38565	0.796	0.477	7.82456e-28	FOXO6
MA0850.1	1.23611e-30	1.38565	0.796	0.477	7.82456e-28	FOXP3
MA0513.1	1.8329e-30	-1.9075	0.156	0.526	1.16022e-27	SMAD2::SMAD3::SMAD4
MA0105.4	1.56169e-29	-1.77996	0.161	0.492	9.88551e-27	NFKB1
MA0865.1	5.04561e-29	1.54157	0.78	0.456	3.19387e-26	E2F8
MA1103.2	6.30053e-29	1.41014	0.79	0.476	3.98823e-26	FOXK2
MA1114.1	6.67912e-29	-1.58503	0.172	0.507	4.22788e-26	PBX3
MA0797.1	1.80855e-28	-1.31443	0.226	0.507	1.14481e-25	TGIF2
MA0144.2	2.72898e-28	1.38642	0.892	0.482	1.72744e-25	STAT3
MA0516.2	6.56686e-28	0.938894	0.806	0.472	4.15682e-25	SP2
MA0868.2	1.66519e-27	1.84699	0.774	0.475	1.05407e-24	SOX8
MA1638.1	3.48007e-27	1.9754	0.817	0.469	2.20289e-24	HAND2
MA0481.3	4.02882e-27	1.33373	0.812	0.481	2.55025e-24	FOXP1
MA0796.1	9.71343e-27	-1.08107	0.247	0.51	6.1486e-24	TGIF1
MA0031.1	1.36314e-26	1.29064	0.796	0.476	8.62865e-24	FOXD1
MA0157.2	1.36314e-26	1.29064	0.796	0.476	8.62865e-24	FOXO3
MA0852.2	4.44623e-26	1.31124	0.801	0.478	2.81447e-23	FOXK1
MA0799.1	8.32378e-26	1.22404	0.769	0.482	5.26895e-23	RFX4
MA0861.1	1.00112e-25	-8.21333	0.048	0.47	6.33711e-23	TP73
MA0736.1	6.38548e-25	1.44903	0.801	0.456	4.04201e-22	GLIS2
MA0017.2	6.88596e-25	-2.41178	0.172	0.436	4.35881e-22	NR2F1
MA0472.2	7.0909e-25	1.27991	0.78	0.451	4.48854e-22	EGR2
MA0758.1	8.99026e-25	1.28293	0.785	0.47	5.69083e-22	E2F7
MA0106.3	7.68097e-24	-8.07792	0.059	0.474	4.86205e-21	TP53
MA0596.1	9.24975e-24	-1.63286	0.194	0.503	5.85509e-21	SREBF2
MA1571.1	9.76392e-24	-1.28686	0.247	0.502	6.18056e-21	TGIF2LX
MA1561.1	6.71342e-23	1.25679	0.763	0.47	4.2496e-20	SOX12
MA1152.1	2.89373e-22	1.78423	0.726	0.459	1.83173e-19	SOX15
MA1572.1	6.62539e-22	-1.18827	0.242	0.506	4.19387e-19	TGIF2LY
MA1564.1	1.4284e-21	0.71967	0.753	0.479	9.04178e-19	SP9
MA0822.1	2.24052e-21	-1.40754	0.215	0.489	1.41825e-18	HES7
MA0112.3	4.51175e-21	-1.67593	0.237	0.473	2.85594e-18	ESR1
MA1683.1	5.13141e-21	1.10189	0.796	0.48	3.24818e-18	FOXA3
MA1522.1	1.1522e-20	0.889769	0.849	0.454	7.29345e-18	MAZ
MA1596.1	2.01472e-20	-0.910278	0.161	0.494	1.27532e-17	ZNF460
MA1578.1	3.11404e-20	1.24737	0.769	0.453	1.97119e-17	VEZF1
MA1584.1	3.74829e-20	1.19014	0.769	0.47	2.37267e-17	ZIC5
MA1517.1	4.22734e-20	-1.29963	0.194	0.5	2.67591e-17	KLF6
MA0731.1	6.89467e-20	1.23333	0.812	0.487	4.36432e-17	BCL6B
MA0482.2	8.53519e-20	-0.724839	0.306	0.493	5.40278e-17	GATA4
MA0047.3	9.32753e-20	1.00717	0.774	0.485	5.90433e-17	FOXA2
MA0738.1	4.33345e-19	-1.51816	0.253	0.511	2.74308e-16	HIC2
MA0634.1	5.36727e-19	0.990659	0.753	0.474	3.39748e-16	ALX3
MA0741.1	2.00189e-18	0.688891	0.801	0.461	1.2672e-15	KLF16
MA0715.1	2.66197e-18	1.16684	0.758	0.475	1.68503e-15	PROP1
MA1468.1	2.68868e-18	1.53853	0.763	0.463	1.70193e-15	ATOH7
MA0139.1	4.03947e-18	1.51713	0.731	0.462	2.55698e-15	CTCF
MA0908.1	5.2816e-18	1.0158	0.726	0.474	3.34326e-15	HOXD11
MA1515.1	7.13805e-18	-0.945917	0.253	0.497	4.51839e-15	KLF2
MA0032.2	7.44687e-18	0.863658	0.758	0.484	4.71387e-15	FOXC1
MA0036.3	7.68667e-18	-0.791678	0.301	0.493	4.86566e-15	GATA2
MA0847.2	1.03106e-17	0.960414	0.753	0.474	6.52663e-15	FOXD2
MA0681.2	2.62692e-17	0.903088	0.796	0.465	1.66284e-14	PHOX2B
MA1562.1	3.4837e-17	1.16256	0.769	0.483	2.20518e-14	SOX14
MA1657.1	3.89303e-17	1.10737	0.78	0.47	2.46429e-14	ZNF652
MA0700.2	3.91402e-17	0.992352	0.742	0.478	2.47758e-14	LHX2
MA0525.2	4.22594e-17	-5.81949	0.086	0.47	2.67502e-14	TP63
MA0693.2	4.26176e-17	-1.35124	0.231	0.497	2.69769e-14	VDR
MA0707.1	5.21049e-17	1.17558	0.774	0.48	3.29824e-14	MNX1
MA0662.1	8.06239e-17	0.867946	0.774	0.478	5.1035e-14	MIXL1
MA1116.1	8.5612e-17	1.06564	0.882	0.527	5.41924e-14	RBPJ
MA0674.1	9.8617e-17	0.990461	0.763	0.484	6.24246e-14	NKX6-1
MA0766.2	1.00107e-16	-0.79296	0.323	0.498	6.33678e-14	GATA5
MA1500.1	2.03955e-16	0.941021	0.785	0.483	1.29104e-13	HOXB6
MA1489.1	2.19185e-16	0.940219	0.737	0.475	1.38744e-13	FOXN3
MA0713.1	3.44727e-16	1.09774	0.731	0.482	2.18212e-13	PHOX2A
MA0702.2	4.01187e-16	0.872226	0.753	0.47	2.53952e-13	LMX1A
MA0030.1	4.47287e-16	1.0153	0.747	0.486	2.83133e-13	FOXF2
MA0037.3	1.31697e-15	-0.669169	0.306	0.489	8.3364e-13	GATA3
MA0729.1	1.78667e-15	-1.43964	0.242	0.474	1.13096e-12	RARA
MA0051.1	1.92844e-15	1.45181	0.812	0.429	1.2207e-12	IRF2
MA1105.2	3.07186e-15	-2.0441	0.263	0.495	1.94449e-12	GRHL2
MA0091.1	5.49936e-15	1.40449	0.742	0.467	3.4811e-12	TAL1::TCF3
MA1545.1	6.00007e-15	0.616976	0.731	0.47	3.79804e-12	OVOL2
MA1544.1	6.20178e-15	0.658678	0.731	0.468	3.92573e-12	OVOL1
MA0772.1	8.04847e-15	0.822341	0.812	0.442	5.09468e-12	IRF7
MA1556.1	1.08513e-14	-1.04015	0.296	0.487	6.8689e-12	RXRG(var.2)
MA0846.1	1.67212e-14	0.851298	0.72	0.476	1.05845e-11	FOXC2
MA0463.2	1.93617e-14	0.908471	0.78	0.489	1.22559e-11	BCL6
MA1577.1	2.35423e-14	0.91601	0.747	0.485	1.49023e-11	TLX2
MA1463.1	2.69896e-14	0.639945	0.747	0.481	1.70844e-11	ARGFX
MA0778.1	3.9301e-14	-1.27809	0.344	0.491	2.48775e-11	NFKB2
MA0873.1	6.3618e-14	0.80898	0.763	0.479	4.02702e-11	HOXD12
MA0867.2	1.23109e-13	1.09746	0.774	0.483	7.79279e-11	SOX4
MA0509.2	1.56678e-13	0.750994	0.726	0.487	9.91775e-11	RFX1
MA0716.1	1.56701e-13	0.819759	0.774	0.479	9.91919e-11	PRRX1
MA0721.1	1.56701e-13	0.819759	0.774	0.479	9.91919e-11	UNCX
MA1496.1	1.93973e-13	0.892492	0.704	0.489	1.22785e-10	HOXA4
MA0635.1	2.1249e-13	1.16571	0.688	0.482	1.34506e-10	BARHL2
MA0809.2	2.51721e-13	0.774605	0.855	0.497	1.59339e-10	TEAD4
MA0630.1	3.01012e-13	0.973282	0.72	0.482	1.90541e-10	SHOX
MA0717.1	3.01012e-13	0.973282	0.72	0.482	1.90541e-10	RAX2
MA0845.1	3.06459e-13	0.807884	0.715	0.473	1.93988e-10	FOXB1
MA0776.1	3.24758e-13	1.00406	0.742	0.478	2.05572e-10	MYBL1
MA1421.1	3.43853e-13	0.829445	0.747	0.474	2.17659e-10	TCF7L1
MA0528.2	3.86148e-13	0.672248	0.806	0.474	2.44432e-10	ZNF263
MA1487.1	5.17193e-13	0.811085	0.78	0.488	3.27383e-10	FOXE1
MA0735.1	5.6037e-13	1.03537	0.72	0.474	3.54714e-10	GLIS1
MA1104.2	6.42135e-13	-0.696583	0.333	0.498	4.06471e-10	GATA6
MA0821.1	6.56049e-13	-1.30199	0.317	0.481	4.15279e-10	HES5
MA1531.1	7.83976e-13	-1.22145	0.306	0.493	4.96257e-10	NR1D1
MA1099.2	7.9837e-13	0.948871	0.699	0.467	5.05368e-10	HES1
MA0077.1	8.86832e-13	1.24465	0.694	0.485	5.61365e-10	SOX9
MA0808.1	3.16116e-12	0.834183	0.833	0.497	2.00101e-09	TEAD3
MA0753.2	3.3889e-12	0.735673	0.737	0.461	2.14517e-09	ZNF740
MA0651.1	3.67259e-12	0.785477	0.747	0.482	2.32475e-09	HOXC11
MA0751.1	3.72507e-12	0.871075	0.753	0.472	2.35797e-09	ZIC4
MA0905.1	3.72797e-12	0.893537	0.699	0.482	2.35981e-09	HOXC10
MA0618.1	3.80999e-12	0.80672	0.753	0.476	2.41173e-09	LBX1
MA0706.1	3.98858e-12	0.710508	0.747	0.489	2.52477e-09	MEOX2
MA0654.1	5.87731e-12	0.626857	0.704	0.487	3.72034e-09	ISX
MA0701.2	5.87731e-12	0.626857	0.704	0.487	3.72034e-09	LHX9
MA1555.1	6.84414e-12	-0.91105	0.317	0.487	4.33234e-09	RXRB(var.2)
MA0523.1	7.85048e-12	1.00866	0.694	0.483	4.96936e-09	TCF7L2
MA0906.1	9.39529e-12	0.874811	0.72	0.478	5.94722e-09	HOXC12
MA0694.1	9.53769e-12	0.802161	0.715	0.468	6.03736e-09	ZBTB7B
MA0442.2	1.20554e-11	0.870485	0.688	0.465	7.63109e-09	SOX10
MA0892.1	1.32188e-11	0.69974	0.71	0.487	8.3675e-09	GSX1
MA0075.3	1.37485e-11	0.633325	0.747	0.483	8.7028e-09	PRRX2
MA0068.2	1.82389e-11	0.638301	0.715	0.488	1.15452e-08	PAX4
MA1506.1	1.93876e-11	0.693542	0.71	0.473	1.22723e-08	HOXD10
MA0149.1	2.18985e-11	0.479285	0.828	0.429	1.38618e-08	EWSR1-FLI1
MA0025.2	2.26921e-11	0.975708	0.72	0.477	1.43641e-08	NFIL3
MA0637.1	2.3805e-11	0.787962	0.634	0.481	1.50685e-08	CENPB
MA0675.1	2.43844e-11	0.690877	0.704	0.475	1.54353e-08	NKX6-2
MA0699.1	5.86668e-11	0.697271	0.72	0.478	3.71361e-08	LBX2
MA0828.1	6.3443e-11	-0.805939	0.317	0.49	4.01594e-08	SREBF2(var.2)
MA1504.1	7.53924e-11	0.759219	0.72	0.489	4.77234e-08	HOXC4
MA0697.1	8.45119e-11	0.8182	0.715	0.472	5.34961e-08	ZIC3
MA0703.2	9.41669e-11	0.631713	0.72	0.473	5.96077e-08	LMX1B
MA1516.1	1.10436e-10	-1.08346	0.306	0.493	6.99063e-08	KLF3
MA0893.2	1.10982e-10	0.605685	0.731	0.486	7.02515e-08	GSX2
MA0057.1	1.18144e-10	0.74757	0.737	0.448	7.4785e-08	MZF1(var.2)
MA0594.2	1.34661e-10	0.884294	0.661	0.479	8.52404e-08	HOXA9
MA1121.1	2.05579e-10	0.575697	0.828	0.501	1.30132e-07	TEAD2
MA1519.1	2.20809e-10	0.659976	0.699	0.483	1.39772e-07	LHX5
MA0780.1	2.46083e-10	0.750851	0.667	0.48	1.55771e-07	PAX3
MA0465.2	2.55731e-10	0.745956	0.71	0.476	1.61878e-07	CDX2
MA0686.1	2.5852e-10	1.00505	0.624	0.478	1.63643e-07	SPDEF
MA0843.1	2.67325e-10	0.852944	0.704	0.474	1.69216e-07	TEF
MA0755.1	3.30618e-10	0.697612	0.651	0.483	2.09281e-07	CUX2
MA1503.1	3.53083e-10	0.796162	0.683	0.487	2.23502e-07	HOXB9
MA1418.1	3.88689e-10	-0.517485	0.812	0.39	2.4604e-07	IRF3
MA0647.1	5.572e-10	-1.59919	0.296	0.496	3.52708e-07	GRHL1
MA0725.1	1.38978e-09	0.623803	0.726	0.49	8.79731e-07	VSX1
MA0899.1	1.9599e-09	0.694462	0.726	0.488	1.24062e-06	HOXA10
MA0912.2	2.62819e-09	0.604472	0.72	0.493	1.66364e-06	HOXD3
MA0734.2	2.93753e-09	-0.885959	0.366	0.474	1.85945e-06	GLI2
MA0718.1	3.41439e-09	0.745743	0.699	0.49	2.16131e-06	RAX
MA0901.2	4.03492e-09	0.471374	0.769	0.477	2.55411e-06	HOXB13
MA0639.1	6.62852e-09	0.761936	0.704	0.468	4.19585e-06	DBP
MA0775.1	6.68923e-09	-0.763737	0.344	0.498	4.23429e-06	MEIS3
MA0691.1	9.30947e-09	0.732566	0.726	0.479	5.8929e-06	TFAP4
MA0913.2	9.50645e-09	0.567169	0.71	0.49	6.01758e-06	HOXD9
MA0877.2	1.02386e-08	0.754828	0.613	0.481	6.48101e-06	BARHL1
MA0756.1	1.03481e-08	0.590203	0.694	0.472	6.55032e-06	ONECUT2
MA0090.3	1.14111e-08	-0.195676	0.828	0.502	7.22323e-06	TEAD1
MA0597.1	1.34542e-08	-0.886543	0.323	0.511	8.51649e-06	THAP1
MA1647.1	1.48901e-08	0.278294	0.785	0.417	9.42541e-06	PRDM4
MA1576.1	1.56639e-08	-1.10667	0.328	0.485	9.91524e-06	THRB(var.3)
MA0490.2	1.6755e-08	1.75106	0.737	0.47	1.06059e-05	JUNB
MA0683.1	1.70572e-08	0.563472	0.699	0.486	1.07972e-05	POU4F2
MA1553.1	2.52363e-08	-0.782421	0.355	0.496	1.59746e-05	RARG(var.3)
MA1120.1	2.55537e-08	1.46849	0.661	0.492	1.61755e-05	SOX13
MA0790.1	3.38695e-08	0.678716	0.715	0.49	2.14394e-05	POU4F1
MA1493.1	4.29788e-08	-0.863462	0.366	0.494	2.72056e-05	HES6
MA0498.2	4.50625e-08	-0.536808	0.376	0.492	2.85246e-05	MEIS1
MA0862.1	6.72898e-08	0.496938	0.667	0.481	4.25945e-05	GMEB2
MA0698.1	6.90239e-08	1.37545	0.747	0.499	4.36921e-05	ZBTB18
MA1534.1	7.19314e-08	0.986095	0.704	0.47	4.55326e-05	NR1I3
MA0719.1	7.77772e-08	-1.13377	0.317	0.503	4.9233e-05	RHOXF1
MA0769.2	9.86772e-08	0.712409	0.694	0.479	6.24627e-05	TCF7
MA0774.1	1.0509e-07	-0.490319	0.387	0.484	6.65221e-05	MEIS2
MA1640.1	1.12738e-07	0.420215	0.737	0.488	7.13631e-05	MEIS2(var.2)
MA0748.2	1.31183e-07	0.495768	0.624	0.472	8.30388e-05	YY2
MA1107.2	1.33447e-07	-0.619043	0.333	0.498	8.44722e-05	KLF9
MA0484.2	1.43458e-07	0.506963	0.753	0.464	9.08086e-05	HNF4G
MA1499.1	1.53471e-07	0.581555	0.694	0.486	9.71471e-05	HOXB4
MA1507.1	1.53471e-07	0.581555	0.694	0.486	9.71471e-05	HOXD4
MA0680.1	1.63714e-07	0.788769	0.672	0.481	0.000103631	PAX7
MA0153.2	1.87486e-07	0.604917	0.688	0.491	0.000118679	HNF1B
MA1137.1	2.15211e-07	0.513536	0.71	0.473	0.000136228	FOSL1::JUNB
MA1529.1	2.4043e-07	-0.857362	0.344	0.51	0.000152192	NHLH2
MA0685.1	2.63704e-07	0.441409	0.624	0.482	0.000166925	SP4
MA1100.2	3.08404e-07	-0.954096	0.376	0.508	0.00019522	ASCL1
MA1142.1	3.22702e-07	0.43357	0.71	0.474	0.00020427	FOSL1::JUND
MA0485.2	3.5868e-07	0.598653	0.677	0.485	0.000227044	HOXC9
MA0669.1	3.6094e-07	0.901149	0.683	0.475	0.000228475	NEUROG2
MA1472.1	3.66262e-07	0.679897	0.737	0.493	0.000231844	BHLHA15(var.2)
MA0793.1	3.88621e-07	0.552885	0.667	0.494	0.000245997	POU6F2
MA0143.4	3.99763e-07	0.984888	0.656	0.476	0.00025305	SOX2
MA0491.2	4.46423e-07	0.768974	0.71	0.473	0.000282586	JUND
MA1563.1	5.76327e-07	0.5314	0.677	0.492	0.000364815	SOX18
MA0132.2	6.00452e-07	0.568472	0.677	0.484	0.000380086	PDX1
MA1481.1	6.00452e-07	0.568472	0.677	0.484	0.000380086	DRGX
MA0479.1	9.84628e-07	0.46311	0.683	0.482	0.00062327	FOXH1
MA1594.1	1.02613e-06	-0.542253	0.392	0.483	0.000649541	ZNF382
MA0768.1	1.05832e-06	0.520376	0.672	0.475	0.000669916	LEF1
MA1132.1	1.16418e-06	-0.265278	0.726	0.472	0.000736928	JUN::JUNB
MA0003.4	1.19779e-06	-1.61586	0.333	0.5	0.000758202	TFAP2A
MA1138.1	1.22364e-06	-0.155297	0.715	0.472	0.000774564	FOSL2::JUNB
MA1108.2	1.32594e-06	-0.84769	0.414	0.495	0.000839319	MXI1
MA0757.1	1.34922e-06	0.593596	0.667	0.474	0.000854056	ONECUT3
MA0878.2	1.35716e-06	0.649144	0.704	0.49	0.000859081	CDX1
MA0894.1	1.3816e-06	0.33328	0.699	0.48	0.000874551	HESX1
MA0644.1	1.47799e-06	0.249793	0.71	0.48	0.000935566	ESX1
MA1523.1	1.77025e-06	-0.59886	0.409	0.482	0.00112057	MSANTD3
MA1128.1	1.77465e-06	0.0214366	0.72	0.474	0.00112335	FOSL1::JUN
MA1585.1	1.89559e-06	-0.46428	0.387	0.506	0.00119991	ZKSCAN1
MA0754.1	1.96331e-06	0.604566	0.624	0.483	0.00124278	CUX1
MA0711.1	2.14994e-06	0.480579	0.645	0.482	0.00136091	OTX1
MA1656.1	2.36991e-06	-1.06857	0.371	0.519	0.00150015	ZNF449
MA0027.2	2.47215e-06	0.500485	0.613	0.483	0.00156487	EN1
MA0798.2	2.5135e-06	0.61598	0.645	0.484	0.00159104	RFX3
MA0655.1	2.73436e-06	0.205565	0.72	0.47	0.00173085	JDP2
MA0777.1	2.73884e-06	0.505333	0.624	0.483	0.00173369	MYBL2
MA1134.1	3.07733e-06	0.226747	0.71	0.473	0.00194795	FOS::JUNB
MA0074.1	3.19072e-06	-0.63326	0.376	0.486	0.00201972	RXRA::VDR
MA1642.1	3.33565e-06	0.718438	0.715	0.469	0.00211147	NEUROG2(var.2)
MA1130.1	3.67736e-06	0.164011	0.71	0.472	0.00232777	FOSL2::JUN
MA0114.4	3.7499e-06	0.507192	0.726	0.465	0.00237369	HNF4A
MA0043.3	3.91496e-06	0.517547	0.677	0.486	0.00247817	HLF
MA1581.1	4.54842e-06	-0.752333	0.398	0.502	0.00287915	ZBTB6
MA1475.1	4.57115e-06	0.509541	0.613	0.462	0.00289354	CREB3L4(var.2)
MA1144.1	5.01065e-06	-0.7805	0.71	0.47	0.00317174	FOSL2::JUND
MA0696.1	5.24047e-06	0.568908	0.694	0.471	0.00331722	ZIC1
MA0024.3	5.74153e-06	0.618178	0.597	0.482	0.00363439	E2F1
MA1101.2	5.97839e-06	-0.256173	0.699	0.477	0.00378432	BACH2
MA0889.1	6.55183e-06	0.298649	0.677	0.489	0.00414731	GBX1
MA1470.1	6.61977e-06	0.539012	0.677	0.48	0.00419032	BACH2(var.2)
MA0841.1	7.22588e-06	0.0188949	0.731	0.48	0.00457398	NFE2
MA0009.2	8.50359e-06	-0.560484	0.425	0.509	0.00538277	TBXT
MA0476.1	8.75863e-06	-0.59678	0.747	0.476	0.00554421	FOS
MA0066.1	9.62462e-06	-0.916983	0.441	0.491	0.00609239	PPARG
MA0099.3	1.0012e-05	-0.523394	0.715	0.474	0.00633759	FOS::JUN
MA1141.1	1.07646e-05	-0.801906	0.699	0.478	0.00681401	FOS::JUND
MA1570.1	1.21608e-05	0.936116	0.64	0.454	0.00769779	TFAP4(var.2)
MA1637.1	1.23281e-05	0.436213	0.731	0.507	0.00780368	EBF3
MA0477.2	1.25849e-05	-0.470082	0.694	0.474	0.00796624	FOSL1
MA1135.1	1.30422e-05	-0.616773	0.72	0.471	0.00825571	FOSB::JUNB
MA1491.1	1.31775e-05	-0.70258	0.419	0.463	0.00834139	GLI3
MA0095.2	1.43412e-05	-0.407458	0.398	0.492	0.00907795	YY1
MA0890.1	1.68874e-05	0.43624	0.618	0.489	0.0106897	GBX2
MA0159.1	1.89129e-05	-0.968468	0.392	0.498	0.0119719	RARA::RXRA
MA0695.1	2.08542e-05	0.501577	0.634	0.477	0.0132007	ZBTB7C
MA1530.1	2.14698e-05	0.384074	0.661	0.493	0.0135904	NKX6-3
MA1113.2	2.23448e-05	0.258414	0.71	0.48	0.0141442	PBX2
MA0678.1	2.33626e-05	0.659356	0.602	0.482	0.0147885	OLIG2
MA1639.1	2.70957e-05	0.342049	0.683	0.487	0.0171516	MEIS1(var.2)
MA0660.1	2.7438e-05	-0.692811	0.349	0.467	0.0173683	MEF2B
MA1592.1	2.83348e-05	-0.659118	0.419	0.481	0.017936	ZNF274
MA0508.3	3.02584e-05	0.271865	0.753	0.457	0.0191536	PRDM1
MA0154.4	3.15076e-05	0.379274	0.737	0.519	0.0199443	EBF1
MA0903.1	3.19273e-05	0.0567726	0.688	0.486	0.02021	HOXB3
MA1552.1	3.69788e-05	-0.585932	0.419	0.495	0.0234076	RARB(var.3)
MA0875.1	3.81728e-05	0.584916	0.651	0.482	0.0241634	BARX1
MA1478.1	3.98699e-05	0.5085	0.613	0.477	0.0252376	DMRTA2
MA1542.1	4.03351e-05	-0.318463	0.371	0.496	0.0255321	OSR1
MA0489.1	4.12901e-05	-1.30798	0.704	0.474	0.0261367	JUN(var.2)
MA0722.1	5.05137e-05	0.323652	0.688	0.491	0.0319752	VAX1
MA0723.1	5.05137e-05	0.323652	0.688	0.491	0.0319752	VAX2
MA1473.1	5.18146e-05	0.471844	0.694	0.486	0.0327986	CDX4
MA0136.2	6.06171e-05	-4.68427	0.323	0.408	0.0383706	ELF5
MA0656.1	6.19853e-05	0.524556	0.618	0.463	0.0392367	JDP2(var.2)
MA1485.1	6.49817e-05	-0.49829	0.403	0.498	0.0411334	FERD3L
MA0258.2	7.42608e-05	-1.02316	0.446	0.477	0.0470071	ESR2
MA0795.1	7.46539e-05	-0.501743	0.392	0.499	0.0472559	SMAD3
MA1634.1	7.84893e-05	0.351257	0.699	0.479	0.0496837	BATF
MA0163.1	8.34423e-05	0.323125	0.661	0.446	0.052819	PLAG1
MA1471.1	8.39266e-05	0.387185	0.624	0.492	0.0531255	BARX2
MA0835.2	8.54898e-05	0.638555	0.699	0.479	0.0541151	BATF3
MA0462.2	8.61564e-05	0.350877	0.704	0.477	0.054537	BATF::JUN
MA0101.1	9.21299e-05	-0.657931	0.72	0.463	0.0583182	REL
MA0710.1	0.00010293	0.308188	0.656	0.486	0.0651548	NOTO
MA0470.2	0.000102945	0.959906	0.575	0.49	0.0651639	E2F4
MA1601.1	0.000106321	0.238587	0.699	0.495	0.0673011	ZNF75D
MA0902.2	0.000124182	0.295612	0.656	0.483	0.0786069	HOXB2
MA1536.1	0.000139286	-1.43614	0.435	0.446	0.0881681	NR2C2(var.2)
MA0866.1	0.000149752	0.490519	0.661	0.495	0.0947929	SOX21
MA0478.1	0.000189062	-1.46516	0.688	0.477	0.119676	FOSL2
MA1537.1	0.000193869	-0.858385	0.409	0.463	0.122719	NR2F1(var.2)
MA0679.2	0.00019923	0.54352	0.608	0.483	0.126112	ONECUT1
MA0864.2	0.000223034	0.502835	0.581	0.489	0.14118	E2F2
MA1602.1	0.000237923	-0.392123	0.403	0.491	0.150605	ZSCAN29
MA0762.1	0.000252614	1.37685	0.532	0.484	0.159905	ETV2
MA0658.1	0.000269043	0.0955483	0.672	0.491	0.170304	LHX6
MA0517.1	0.000300293	-1.29002	0.758	0.357	0.190085	STAT1::STAT2
MA0791.1	0.000331079	0.336592	0.645	0.482	0.209573	POU4F3
MA0666.1	0.000336517	0.334017	0.634	0.494	0.213015	MSX1
MA0708.1	0.000336517	0.334017	0.634	0.494	0.213015	MSX2
MA0876.1	0.000336517	0.334017	0.634	0.494	0.213015	BSX
MA1547.1	0.000359611	-0.692299	0.371	0.498	0.227634	PITX2
MA1575.1	0.000419987	-0.586826	0.441	0.482	0.265852	THRB(var.2)
MA0827.1	0.000421465	0.564395	0.581	0.481	0.266787	OLIG3
MA0495.3	0.000445379	0.420932	0.672	0.462	0.281925	MAFF
MA0486.2	0.000470047	0.298572	0.688	0.467	0.29754	HSF1
MA0684.2	0.000487509	-0.773441	0.435	0.469	0.308593	RUNX3
MA1125.1	0.000542031	0.336596	0.608	0.474	0.343106	ZNF384
MA1568.1	0.000547951	0.539762	0.651	0.469	0.346853	TCF21(var.2)
MA0811.1	0.000595205	-1.49523	0.409	0.5	0.376765	TFAP2B
MA1645.1	0.000629674	-0.446437	0.462	0.488	0.398583	NKX2-2
MA0667.1	0.000659004	0.617857	0.629	0.472	0.417149	MYF6
MA0726.1	0.000677305	0.287333	0.64	0.492	0.428734	VSX2
MA1476.1	0.000712117	0.354352	0.618	0.491	0.45077	DLX5
MA1511.1	0.00073728	-0.483963	0.392	0.498	0.466698	KLF10
MA0886.1	0.000824853	0.031766	0.656	0.493	0.522132	EMX2
MA0605.2	0.000837169	0.462875	0.624	0.463	0.529928	ATF3
MA0682.2	0.000841182	0.255373	0.677	0.494	0.532468	PITX1
MA0496.3	0.000924629	-1.90691	0.392	0.52	0.58529	MAFK
MA1579.1	0.000927361	0.303189	0.71	0.509	0.587019	ZBTB26
MA1154.1	0.000981591	0.231478	0.71	0.464	0.621347	ZNF282
MA1557.1	0.0010291	-0.456309	0.425	0.496	0.651421	SMAD5
MA0814.2	0.00104814	-0.873967	0.366	0.507	0.663471	TFAP2C(var.2)
MA0747.1	0.00107601	0.262107	0.602	0.48	0.681113	SP8
MA0028.2	0.00109612	-0.145821	0.613	0.471	0.693844	ELK1
MA0612.2	0.0011506	0.247096	0.597	0.488	0.728328	EMX1
MA1533.1	0.00126023	-0.560399	0.409	0.49	0.797723	NR1I2
MA0657.1	0.00126275	-0.41584	0.398	0.501	0.799323	KLF13
MA0524.2	0.00133817	-1.4266	0.414	0.497	0.84706	TFAP2C
MA0844.1	0.0013974	-0.287833	0.425	0.482	0.884556	XBP1
MA0767.1	0.0015724	0.365144	0.64	0.483	0.995328	GCM2
MA0488.1	0.00162575	-0.806885	0.452	0.463	1	JUN
MA0107.1	0.00163313	-0.973656	0.699	0.458	1	RELA
MA0093.3	0.00173051	-1.80667	0.419	0.423	1	USF1
MA0714.1	0.00178286	0.251206	0.661	0.491	1	PITX3
MA0759.1	0.00181044	-0.157836	0.597	0.469	1	ELK3
MA1110.1	0.00192496	-0.0135431	0.661	0.456	1	NR1H4
MA0140.2	0.00216959	-0.250215	0.43	0.493	1	GATA1::TAL1
MA0834.1	0.00217148	0.534444	0.602	0.472	1	ATF7
MA1129.1	0.0023467	0.730269	0.608	0.474	1	FOSL1::JUN(var.2)
MA0475.2	0.00260351	0.0901902	0.591	0.495	1	FLI1
MA0909.2	0.00265671	0.27974	0.613	0.483	1	HOXD13
MA0650.2	0.00308103	0.267647	0.602	0.492	1	HOXA13
MA0089.2	0.00313892	-0.227023	0.672	0.519	1	NFE2L1
MA1589.1	0.00334952	-0.586493	0.446	0.485	1	ZNF140
MA0079.4	0.0033529	-0.36775	0.414	0.494	1	SP1
MA1126.1	0.00347329	0.456257	0.57	0.458	1	FOS::JUN(var.2)
MA0687.1	0.00370816	-10.3759	0.36	0.249	1	SPIC
MA0088.2	0.00379473	-0.44945	0.441	0.491	1	ZNF143
MA1574.1	0.00390463	-0.800114	0.473	0.452	1	THRB
MA1569.1	0.0044191	-0.0919849	0.672	0.501	1	TFAP2E
MA1112.2	0.00455501	-0.872674	0.651	0.413	1	NR4A1
MA0746.2	0.00540373	0.125623	0.538	0.481	1	SP3
MA0819.1	0.00548047	0.37472	0.597	0.483	1	CLOCK
MA0771.1	0.00551198	0.287218	0.618	0.478	1	HSF4
MA0914.1	0.00573334	0.364107	0.618	0.498	1	ISL2
MA1133.1	0.00594952	0.51943	0.591	0.464	1	JUN::JUNB(var.2)
MA1588.1	0.00595394	0.245216	0.651	0.478	1	ZNF136
MA0599.1	0.00603625	0.19981	0.645	0.482	1	KLF5
MA0609.2	0.00616649	0.407899	0.634	0.462	1	CREM
MA1419.1	0.00662451	0.220639	0.597	0.46	1	IRF4
MA1540.1	0.00692742	-1.20191	0.478	0.443	1	NR5A1
MA0659.2	0.00699391	0.263514	0.656	0.456	1	MAFG
MA0724.1	0.00719916	0.362278	0.581	0.491	1	VENTX
MA0773.1	0.00746462	-0.433805	0.435	0.457	1	MEF2D
MA0160.1	0.00777148	-1.56588	0.452	0.418	1	NR4A2
MA0740.1	0.00797144	0.221003	0.527	0.492	1	KLF14
MA0645.1	0.00865541	-4.16028	0.333	0.456	1	ETV6
MA1479.1	0.00867222	0.509455	0.586	0.483	1	DMRTC2
MA0855.1	0.00874381	-0.708641	0.43	0.457	1	RXRB
MA1143.1	0.0092348	0.364434	0.597	0.482	1	FOSL1::JUND(var.2)
MA1139.1	0.00937987	0.422587	0.575	0.466	1	FOSL2::JUNB(var.2)
MA0466.2	0.01005	0.624411	0.597	0.475	1	CEBPB
MA0620.3	0.0102865	-1.39383	0.419	0.425	1	MITF
MA1497.1	0.010457	0.00889996	0.618	0.488	1	HOXA6
MA1554.1	0.0107441	0.202337	0.591	0.499	1	RFX7
MA0098.3	0.0107668	0.0516796	0.559	0.485	1	ETS1
MA0073.1	0.0107675	0.240849	0.591	0.461	1	RREB1
MA0663.1	0.0110129	0.215676	0.608	0.457	1	MLX
MA0628.1	0.0120949	0.164377	0.575	0.492	1	POU6F1
MA1136.1	0.012206	0.391747	0.608	0.47	1	FOSB::JUNB(var.2)
MA0815.1	0.012651	0.103232	0.656	0.502	1	TFAP2C(var.3)
MA0839.1	0.0130901	-0.188663	0.468	0.481	1	CREB3L1
MA0500.2	0.0134513	0.399902	0.634	0.492	1	MYOG
MA0616.2	0.0135549	0.40719	0.597	0.467	1	HES2
MA0035.4	0.0135609	-0.0142365	0.441	0.485	1	GATA1
MA1106.1	0.0143133	-0.373213	0.473	0.499	1	HIF1A
MA0468.1	0.0153965	0.344858	0.613	0.487	1	DUX4
MA0119.1	0.0155248	-1.39944	0.435	0.525	1	NFIC::TLX1
MA0765.2	0.0164769	-1.4702	0.376	0.494	1	ETV5
MA1633.1	0.0166777	-2.06171	0.656	0.505	1	BACH1
MA0760.1	0.0167492	0.825067	0.554	0.492	1	ERF
MA1420.1	0.0175144	0.0998329	0.575	0.47	1	IRF5
MA1117.1	0.017676	0.274498	0.661	0.494	1	RELB
MA0474.2	0.0181419	0.1603	0.581	0.493	1	ERG
MA0502.2	0.018997	0.455573	0.543	0.501	1	NFYB
MA0661.1	0.0193156	-0.132234	0.608	0.497	1	MEOX1
MA0050.2	0.0196488	-0.997983	0.72	0.383	1	IRF1
MA0770.1	0.0198932	0.0663485	0.629	0.47	1	HSF2
MA0526.3	0.0199232	-1.91834	0.468	0.413	1	USF2
MA0737.1	0.0206705	0.178067	0.591	0.479	1	GLIS3
MA0642.1	0.0210571	-0.0195972	0.629	0.489	1	EN2
MA1495.1	0.0224048	0.0648444	0.608	0.493	1	HOXA1
MA0900.2	0.0224048	0.0648444	0.608	0.493	1	HOXA2
MA0907.1	0.0225555	0.17533	0.608	0.492	1	HOXC13
MA1597.1	0.0229027	0.0186904	0.694	0.491	1	ZNF528
MA1464.1	0.0242078	0.178467	0.602	0.447	1	ARNT2
MA0727.1	0.0257054	0.0922284	0.613	0.479	1	NR3C2
MA1131.1	0.0259031	0.420738	0.575	0.465	1	FOSL2::JUN(var.2)
MA0763.1	0.0261647	-0.219727	0.548	0.482	1	ETV3
MA1505.1	0.026244	0.164386	0.527	0.486	1	HOXC8
MA1155.1	0.0283063	0.386828	0.624	0.502	1	ZSCAN4
MA0856.1	0.0294492	-0.650054	0.468	0.454	1	RXRG
MA0071.1	0.0301632	0.229958	0.608	0.453	1	RORA
MA1140.2	0.031751	0.370433	0.554	0.473	1	JUNB(var.2)
MA0598.3	0.0320552	-7.5239	0.36	0.349	1	EHF
MA0882.1	0.0331871	0.012589	0.64	0.491	1	DLX6
MA1509.1	0.0335328	0.164582	0.597	0.487	1	IRF6
MA0842.2	0.0338476	0.273306	0.629	0.476	1	NRL
MA0076.2	0.0340191	-0.433224	0.543	0.5	1	ELK4
MA1109.1	0.0362359	0.32849	0.667	0.472	1	NEUROD1
MA1550.1	0.04072	-0.607193	0.516	0.462	1	PPARD
MA0648.1	0.0409244	0.0591115	0.618	0.492	1	GSC
MA1467.1	0.0418165	0.0925548	0.64	0.484	1	ATOH1(var.2)
MA1580.1	0.0427471	0.307914	0.586	0.497	1	ZBTB32
MA0789.1	0.0436652	-0.194605	0.457	0.494	1	POU3F4
MA0113.3	0.0439277	0.0139582	0.597	0.484	1	NR3C1
MA1150.1	0.0463502	0.273419	0.586	0.472	1	RORB
MA0664.1	0.0474362	0.17247	0.591	0.453	1	MLXIPL
MA0469.3	0.050616	-0.188858	0.468	0.496	1	E2F3
MA0592.3	0.0515512	-1.00199	0.516	0.435	1	ESRRA
MA0156.2	0.0517515	-0.418972	0.57	0.482	1	FEV
MA0138.2	0.0521116	-0.353053	0.484	0.503	1	REST
MA1124.1	0.0553252	0.102444	0.602	0.501	1	ZNF24
MA1636.1	0.0612859	-0.563818	0.495	0.504	1	CEBPG(var.2)
MA0788.1	0.0616804	0.256101	0.543	0.488	1	POU3F3
MA0872.1	0.063737	0.11254	0.629	0.506	1	TFAP2A(var.3)
MA1541.1	0.0649648	-0.404828	0.505	0.455	1	NR6A1
MA1466.1	0.0649667	-0.176231	0.478	0.488	1	ATF6
MA0083.3	0.0650302	0.0779747	0.597	0.463	1	SRF
MA0473.3	0.0651156	-2.83934	0.414	0.393	1	ELF1
MA0826.1	0.0665951	0.377479	0.602	0.488	1	OLIG1
MA1646.1	0.0681441	-0.45816	0.495	0.492	1	OSR2
MA0081.2	0.0688116	-9.77398	0.382	0.251	1	SPIB
MA0640.2	0.0702448	-5.30135	0.425	0.344	1	ELF3
MA0063.2	0.0716775	-0.221332	0.495	0.476	1	NKX2-5
MA1518.1	0.0748295	0.0307316	0.575	0.494	1	LHX1
MA0653.1	0.0826028	-0.825826	0.597	0.455	1	IRF9
MA1520.1	0.08504	-0.33554	0.478	0.505	1	MAF
MA0730.1	0.0924267	-0.57097	0.5	0.48	1	RARA(var.2)
MA1501.1	0.0925431	0.0518064	0.559	0.49	1	HOXB7
MA0130.1	0.09282	-0.263494	0.478	0.498	1	ZNF354C
MA1535.1	0.0929338	-0.872093	0.489	0.453	1	NR2C1
MA0641.1	0.102073	-1.05825	0.414	0.481	1	ELF4
MA0787.1	0.102594	0.194371	0.511	0.482	1	POU3F2
MA0062.3	0.104938	-2.45276	0.392	0.409	1	GABPA
MA1560.1	0.111302	-0.1831	0.516	0.484	1	SOHLH2
MA0504.1	0.115092	0.121683	0.618	0.454	1	NR2C2
MA0712.2	0.119206	-0.42652	0.505	0.494	1	OTX2
MA1127.1	0.121473	0.485258	0.538	0.478	1	FOSB::JUN
MA0046.2	0.12196	0.269621	0.597	0.488	1	HNF1A
MA0817.1	0.129904	0.171478	0.565	0.489	1	BHLHE23
MA1484.1	0.139539	0.182291	0.532	0.484	1	ETS2
MA1599.1	0.140697	-0.257823	0.532	0.503	1	ZNF682
MA0836.2	0.141267	0.214689	0.554	0.507	1	CEBPD
MA0794.1	0.142439	0.187822	0.559	0.482	1	PROX1
MA1119.1	0.147141	0.0744682	0.618	0.491	1	SIX2
MA1573.1	0.151556	-0.32207	0.484	0.491	1	THAP11
MA1651.1	0.155856	0.122986	0.591	0.485	1	ZFP42
MA0056.2	0.163801	-0.475315	0.559	0.464	1	MZF1
MA1649.1	0.173594	-0.477148	0.5	0.499	1	ZBTB12
MA0673.1	0.182686	-0.187267	0.489	0.485	1	NKX2-8
MA0646.1	0.184863	-0.296518	0.478	0.494	1	GCM1
MA0895.1	0.189158	0.2078	0.527	0.48	1	HMBOX1
MA1146.1	0.193479	-0.331388	0.478	0.469	1	NR1H4::RXRA
MA0100.3	0.197214	-0.192773	0.516	0.482	1	MYB
MA0891.1	0.199017	-0.0412114	0.575	0.494	1	GSC2
MA0638.1	0.212241	0.130336	0.543	0.482	1	CREB3
MA0749.1	0.212317	0.149274	0.505	0.487	1	ZBED1
MA0038.2	0.226648	-0.295683	0.613	0.504	1	GFI1
MA1528.1	0.226663	-0.818393	0.64	0.509	1	NFIX(var.2)
MA0671.1	0.227322	-0.661122	0.495	0.508	1	NFIX
MA0048.2	0.228257	-0.293162	0.548	0.502	1	NHLH1
MA0039.4	0.241806	-0.153566	0.5	0.496	1	KLF4
MA0818.1	0.242308	0.323524	0.575	0.486	1	BHLHE22
MA0155.1	0.243937	0.0921248	0.624	0.475	1	INSM1
MA0784.1	0.248646	0.188147	0.565	0.489	1	POU1F1
MA0511.2	0.250572	0.0749826	0.527	0.468	1	RUNX2
MA0497.1	0.251856	0.0191349	0.559	0.45	1	MEF2C
MA0072.1	0.258309	0.194056	0.586	0.467	1	RORA(var.2)
MA0904.2	0.267473	-0.0227453	0.548	0.497	1	HOXB5
MA1512.1	0.281912	-0.135894	0.468	0.491	1	KLF11
MA0810.1	0.283222	-0.635245	0.516	0.505	1	TFAP2A(var.2)
MA1632.1	0.291089	-0.827381	0.565	0.441	1	ATF2
MA0823.1	0.297742	-0.252138	0.516	0.464	1	HEY1
MA0813.1	0.298737	-0.131849	0.608	0.504	1	TFAP2B(var.3)
MA0884.1	0.304147	0.0594085	0.586	0.492	1	DUXA
MA1654.1	0.309306	-0.501375	0.543	0.516	1	ZNF16
MA0652.1	0.318956	-0.554634	0.538	0.445	1	IRF8
MA0069.1	0.324502	0.144481	0.565	0.489	1	PAX6
MA0141.3	0.32794	-0.548749	0.602	0.425	1	ESRRB
MA1539.1	0.336322	-0.305909	0.5	0.474	1	NR2F6(var.3)
MA1641.1	0.338187	0.0724798	0.634	0.49	1	MYF5
MA1524.1	0.341683	-0.0763288	0.495	0.482	1	MSGN1
MA0786.1	0.350838	0.0915762	0.511	0.491	1	POU3F1
MA0501.1	0.353547	-0.185667	0.57	0.521	1	MAF::NFE2
MA1549.1	0.360989	0.0387658	0.522	0.495	1	POU6F1(var.2)
MA1494.1	0.362052	-0.0546333	0.591	0.477	1	HNF4A(var.2)
MA0014.3	0.365258	0.174675	0.565	0.465	1	PAX5
MA1532.1	0.370886	-0.226149	0.522	0.478	1	NR1D2
MA1538.1	0.379984	0.294921	0.57	0.463	1	NR2F1(var.3)
MA0831.2	0.380732	-0.951926	0.548	0.419	1	TFE3
MA0752.1	0.39496	-0.160278	0.5	0.488	1	ZNF410
MA0871.2	0.400028	-0.335976	0.57	0.441	1	TFEC
MA1111.1	0.401211	-1.69114	0.495	0.394	1	NR2F2
MA0750.2	0.413944	-0.24043	0.5	0.49	1	ZBTB7A
MA0059.1	0.414401	-0.0562329	0.57	0.466	1	MAX::MYC
MA1635.1	0.414664	-0.0558332	0.608	0.505	1	BHLHE22(var.2)
MA0060.3	0.414752	0.137041	0.516	0.51	1	NFYA
MA1145.1	0.41563	0.247393	0.489	0.461	1	FOSL2::JUND(var.2)
MA0812.1	0.425245	-0.816741	0.532	0.507	1	TFAP2B(var.2)
MA0507.1	0.441802	-0.0567719	0.489	0.48	1	POU2F2
MA0838.1	0.449756	-0.223765	0.548	0.46	1	CEBPG
MA0692.1	0.449995	-0.965678	0.538	0.42	1	TFEB
MA0672.1	0.460612	0.0477855	0.5	0.481	1	NKX2-3
MA1483.1	0.469766	-0.782931	0.446	0.487	1	ELF2
MA0649.1	0.47151	0.207813	0.538	0.467	1	HEY2
MA1546.1	0.483211	0.1023	0.575	0.483	1	PAX3(var.2)
MA1498.1	0.483213	0.152523	0.516	0.49	1	HOXA7
MA1502.1	0.483213	0.152523	0.516	0.49	1	HOXB8
MA0910.2	0.483213	0.152523	0.516	0.49	1	HOXD8
MA1508.1	0.494706	-2.8686	0.511	0.314	1	IKZF1
MA1521.1	0.500665	-0.218772	0.505	0.504	1	MAFA
MA0627.2	0.50622	-0.166815	0.516	0.482	1	POU2F3
MA1480.1	0.507708	0.227479	0.511	0.491	1	DPRX
MA0259.1	0.520168	-0.0832315	0.548	0.488	1	ARNT::HIF1A
MA0804.1	0.53321	-0.00400449	0.522	0.489	1	TBX19
MA0102.4	0.53718	-0.255174	0.559	0.506	1	CEBPA
MA0058.3	0.55587	-0.0279631	0.532	0.466	1	MAX
MA1151.1	0.559239	-0.105866	0.543	0.473	1	RORC
MA0781.1	0.560739	-0.0344936	0.478	0.484	1	PAX9
MA0887.1	0.561549	-0.130612	0.511	0.49	1	EVX1
MA1643.1	0.573026	-1.48857	0.591	0.52	1	NFIB
MA1600.1	0.57756	-0.331759	0.527	0.496	1	ZNF684
MA0610.1	0.597012	-0.0942927	0.538	0.493	1	DMRT3
MA1149.1	0.606134	-0.257065	0.565	0.472	1	RARA::RXRG
MA1527.1	0.607104	-1.09261	0.645	0.521	1	NFIC(var.2)
MA0492.1	0.616806	-0.336004	0.527	0.462	1	JUND(var.2)
MA1147.1	0.624798	-0.11834	0.495	0.47	1	NR4A2::RXRA
MA1652.1	0.626503	-1.34596	0.516	0.369	1	ZKSCAN5
MA0070.1	0.627507	0.0333976	0.495	0.501	1	PBX1
MA1644.1	0.63395	0.0625467	0.532	0.503	1	NFYC
MA0833.2	0.646636	-0.216308	0.527	0.481	1	ATF4
MA0080.5	0.673274	-7.53604	0.522	0.24	1	SPI1
MA0158.2	0.682004	-0.0952382	0.548	0.491	1	HOXA5
MA0104.4	0.690657	0.0251924	0.532	0.473	1	MYCN
MA0863.1	0.69924	-0.0873815	0.538	0.491	1	MTF1
MA0464.2	0.7027	-0.148328	0.5	0.471	1	BHLHE40
MA1148.1	0.715354	-0.3715	0.538	0.464	1	PPARA::RXRA
MA0115.1	0.716112	-0.234721	0.559	0.446	1	NR1H2::RXRA
MA0888.1	0.727607	-0.211832	0.532	0.495	1	EVX2
MA0792.1	0.730164	0.0416312	0.473	0.483	1	POU5F1B
MA0052.4	0.736352	0.00217046	0.478	0.464	1	MEF2A
MA1514.1	0.744683	0.0198196	0.527	0.479	1	KLF17
MA1115.1	0.744867	-0.0395186	0.548	0.478	1	POU5F1
MA1118.1	0.749156	-0.0632712	0.538	0.493	1	SIX1
MA1583.1	0.756791	-0.0407657	0.516	0.501	1	ZFP57
MA1474.1	0.762959	0.106503	0.511	0.475	1	CREB3L4
MA1593.1	0.771552	-0.0581162	0.527	0.477	1	ZNF317
MA0623.2	0.772019	0.447055	0.543	0.488	1	NEUROG1
MA0665.1	0.79256	0.0168691	0.602	0.485	1	MSC
MA0761.2	0.79442	-0.695899	0.452	0.417	1	ETV1
MA0764.2	0.811711	-1.78964	0.462	0.359	1	ETV4
MA0670.1	0.819555	-0.589616	0.548	0.504	1	NFIA
MA0145.3	0.87219	-0.479584	0.543	0.49	1	TFCP2
MA0837.1	0.875976	-0.320517	0.554	0.463	1	CEBPE
MA1655.1	0.879912	-0.436253	0.591	0.499	1	ZNF341
MA0668.1	0.886108	0.238675	0.538	0.484	1	NEUROD2
MA0825.1	0.889285	-0.184007	0.586	0.47	1	MNT
MA0779.1	0.906531	0.143252	0.495	0.478	1	PAX1
MA0785.1	0.914676	-0.113314	0.527	0.487	1	POU2F1
MA0161.2	0.925221	-0.700642	0.543	0.509	1	NFIC
MA0636.1	0.925616	-0.158272	0.495	0.46	1	BHLHE41
MA1548.1	0.926286	0.173135	0.575	0.478	1	PLAGL2
MA0018.4	0.957012	-0.438966	0.543	0.437	1	CREB1
MA0147.3	0.992341	-0.00674051	0.548	0.463	1	MYC
